# Supplementary material for: Identification of a Goat Intersexuality-Associated Novel Variant Through Genome-Wide Resequencing and Hi-C
Source: Front Genet. 2021 Feb 9;11:616743. doi: 10.3389/fgene.2020.616743 (PMC7901718; doi:10.3389/fgene.2020.616743)
Supplement: Supplementary file 7 [file Table_7.xlsx]

## Sheet: 35 PIS versus 186 normal
Table S7. CNV selective sweep parameters estimation of different experiment grouping (1) 35 intersex goats versus 186 normal goats and (2) 26 intersex goats versus 20 normal goats within the Tangshan dairy goat population.
CHROM	POS	35_vs_186_Fst	35_vs_186_Vst	Gene	Type	CNV_Info	CNV_Type	SILHOUETTESCORE	12	313	39	4	13	40	22	8	305	17	26	6	24	42	11	307	19	37	5	41	23	14	10	18	25	43	16	21	38	BS1	ERR340330	ERR340331	ERR340334	ERR340338	ERR340340	ERR340344	ERR340345	ERR340347	ERR340348	ERR340426	ERR470100
1	1793001	0.0108759	0.00366987	MIS18A(dist=102466),HUNK(dist=167294)	intergenic	1:1793001-1813000	CN0	0.970634	1/1:0.06	1/1:0.02	1/1:0.0	1/1:0.06	1/1:0.06	0/1:1.04	0/1:1.18	1/1:0.02	1/1:0.02	1/1:0.04	1/1:0.0	1/1:0.04	1/1:0.04	0/1:1.2	1/1:0.06	1/1:0.04	1/1:0.0	1/1:0.0	1/1:0.04	1/1:0.06	1/1:0.04	1/1:0.08	1/1:0.04	1/1:0.04	1/1:0.0	1/1:0.06	1/1:0.0	1/1:0.04	1/1:0.02	0/0:1.98	1/1:0.02	1/1:0.0	1/1:0.02	1/1:0.0	1/1:0.02	1/1:0.02	1/1:0.02	1/1:0.02	1/1:0.02	1/1:0.02	1/1:0.04
1	7317001	0.0333227	0.042706	LOC108636748(dist=970285),ADAMTS5(dist=494903)	intergenic	1:7317001-7323500	CN0	0.825996	0/0:2.18	0/0:2.06	0/0:2.04	0/0:2.2	0/0:2.02	0/0:2.0	0/0:2.1	0/0:2.26	0/0:2.02	0/1:1.24	0/0:2.32	0/0:1.9	0/0:2.08	0/0:2.16	0/0:2.16	0/0:2.06	0/0:2.04	0/0:2.1	0/0:2.34	0/0:2.08	0/0:2.14	0/0:2.16	0/0:2.1	0/0:2.14	0/0:1.76	0/0:2.1	0/0:2.3	0/0:2.38	0/0:1.84	1/1:0.02	0/0:1.98	0/0:1.92	0/0:1.96	0/0:1.88	0/0:1.98	0/0:1.98	0/0:1.94	0/0:1.8	0/0:1.74	0/0:1.8	0/0:2.04
1	9910001	-0.00853812	0.00555279	MIR155(dist=647609),NONE(dist=NONE)	intergenic	1:9910001-9913000	CN0	0.731	0/0:2.3	0/1:1.08	0/0:1.78	0/0:2.24	0/0:2.04	0/0:2.12	0/0:2.24	0/0:2.12	0/0:1.98	0/0:2.3	0/0:2.18	0/1:1.1	0/0:2.2	0/1:1.2	0/0:1.84	0/0:2.16	0/0:2.08	0/0:2.18	0/0:2.18	0/0:2.32	0/0:2.44	0/1:1.04	0/0:2.0	0/0:2.14	0/0:1.92	0/0:2.26	0/0:2.64	0/0:2.44	0/0:1.96	0/0:1.68	0/0:2.2	0/0:2.02	0/0:1.9	0/1:1.32	0/0:2.16	0/1:1.36	0/1:1.12	0/0:1.54	0/0:1.62	0/1:1.3	0/1:1.3
1	10298501	0.0641286	0.0323037	MIR155(dist=1036109),NONE(dist=NONE)	intergenic	1:10298501-10302000	CN0,CN2	0.665061	0/0:2.1	0/0:1.96	0/0:1.72	0/1:0.92	0/0:1.84	0/1:0.88	0/0:1.88	0/1:0.8	0/0:1.92	0/0:2.02	0/0:1.86	0/1:1.08	0/0:1.88	0/0:1.9	0/0:2.06	0/1:0.96	0/0:2.32	0/1:1.1	0/1:0.86	0/1:0.94	0/0:2.14	0/1:0.82	0/1:0.96	0/0:2.24	0/0:2.12	0/1:0.92	0/0:2.36	0/0:2.26	0/1:1.04	0/0:1.76	1/1:0.0	0/0:2.02	0/1:0.98	0/0:2.24	0/0:2.1	0/0:1.86	0/0:2.02	0/0:1.68	0/0:1.88	0/1:1.02	0/2:2.86
1	10459501	0.0436837	0.00421222	MIR155(dist=1197109),NONE(dist=NONE)	intergenic	1:10459501-10465500	CN0	0.777916	0/1:1.02	0/0:1.82	0/0:1.62	0/0:2.04	0/0:1.86	0/0:2.04	0/0:1.96	0/0:2.02	0/1:1.12	0/0:2.06	0/0:1.96	0/0:2.12	0/0:2.02	0/1:1.38	0/1:1.26	0/0:1.92	0/1:1.04	0/0:2.36	0/0:2.02	0/0:2.08	0/0:1.88	0/0:2.02	0/0:1.96	0/0:1.88	0/0:2.2	0/0:2.0	0/0:1.8	0/1:0.84	0/0:2.0	0/0:1.78	0/0:1.98	0/0:1.64	0/0:2.02	0/0:1.94	0/0:1.84	0/0:1.76	0/0:1.76	0/0:1.92	0/0:1.9	0/0:1.82	0/0:2.1
1	10466501	0.0182084	0.00216876	MIR155(dist=1204109),NONE(dist=NONE)	intergenic	1:10466501-10481000	CN0	0.82361	0/1:0.98	0/0:2.0	0/0:2.08	0/0:1.94	0/0:1.94	0/0:2.1	0/0:2.14	0/0:1.88	0/1:0.92	0/0:2.12	0/0:1.82	0/0:2.02	0/0:1.84	0/0:1.84	0/1:1.16	0/0:1.9	0/1:1.16	0/0:2.12	0/0:1.84	0/0:1.94	0/0:1.96	0/0:2.08	0/0:2.0	0/0:2.04	0/0:2.1	0/0:2.22	0/0:1.9	0/1:0.92	0/0:1.98	0/0:2.02	0/0:1.96	0/0:1.88	0/0:1.96	0/0:1.68	0/0:1.88	0/0:1.92	0/0:1.92	0/0:2.0	0/0:1.98	0/0:2.06	0/0:2.28
1	11438501	0.00116941	0.00330618	NONE(dist=NONE),NONE(dist=NONE)	intergenic	1:11438501-11443000	CN0	0.776665	0/0:2.18	0/0:2.22	0/1:1.26	0/0:2.04	0/0:1.96	0/0:2.22	0/0:1.46	0/0:2.16	0/0:2.16	0/1:1.24	0/0:2.54	0/1:1.08	1/1:0.06	0/0:2.24	1/1:0.06	1/1:0.02	0/0:2.48	0/0:1.94	0/0:2.5	0/0:1.56	0/0:2.14	1/1:0.08	0/1:1.18	0/0:1.68	0/0:2.5	0/0:2.44	0/1:0.88	0/0:1.64	1/1:0.02	1/1:0.02	0/1:0.88	0/1:0.66	0/1:1.08	0/1:1.06	0/0:1.88	0/0:1.58	0/0:2.0	0/0:2.14	1/1:0.0	0/0:1.66	0/1:1.12
1	11476001	-0.00843846	7.57218e-06	NONE(dist=NONE),NONE(dist=NONE)	intergenic	1:11476001-11484500	CN0	0.780856	0/1:1.2	0/0:2.1	0/1:0.92	0/0:2.26	0/0:2.16	0/0:2.24	0/0:2.16	0/0:2.44	0/0:2.32	0/0:2.1	0/0:2.1	0/1:1.16	0/0:2.06	0/1:1.02	0/0:2.3	0/0:2.1	0/0:2.52	0/1:1.1	0/0:1.88	0/0:2.22	0/0:2.14	0/0:2.26	0/0:2.14	0/0:2.04	0/0:2.18	0/0:2.42	0/0:2.0	0/0:2.28	0/0:2.16	0/0:1.78	0/0:1.88	0/0:1.52	0/0:2.02	0/0:2.02	0/0:2.34	0/0:1.96	0/0:1.84	0/0:2.26	0/0:2.02	0/0:2.06	0/0:1.88
1	11528001	0.00659284	0.0241366	NONE(dist=NONE),NONE(dist=NONE)	intergenic	1:11528001-11535000	CN0	0.819306	0/0:1.96	0/0:2.04	0/0:1.8	0/0:2.18	0/0:1.86	0/0:1.9	0/0:2.08	0/0:1.98	0/0:1.96	0/0:1.94	0/0:1.8	0/0:1.98	0/0:2.0	0/0:1.84	0/0:2.26	0/0:1.96	0/0:2.0	0/0:1.8	0/0:2.18	0/0:2.26	0/0:2.22	0/0:1.84	0/0:2.06	0/0:2.08	0/0:2.2	0/0:2.46	0/0:2.1	0/1:1.04	0/0:2.14	0/0:1.78	0/0:1.78	0/0:1.66	0/0:2.18	0/0:2.08	0/0:1.9	0/0:1.98	0/0:1.94	0/0:2.0	0/0:1.88	0/0:2.0	0/0:1.98
1	11868001	0.063661	0.0460362	NONE(dist=NONE),TRNAS-GGA(dist=1673407)	intergenic	1:11868001-11874500	CN0,CN2	0.770592	0/0:2.06	0/0:2.02	0/0:1.98	0/0:2.08	0/0:2.14	0/0:2.14	0/0:1.94	0/2:2.64	0/0:2.04	0/1:0.86	0/0:2.14	0/0:2.12	0/0:2.24	0/0:2.26	0/0:2.0	0/0:2.14	0/0:2.0	0/0:2.2	0/1:1.4	0/0:2.34	0/0:2.18	0/0:1.96	0/0:2.0	0/0:2.16	0/0:2.12	0/0:2.3	0/1:1.0	0/0:2.14	0/0:2.12	0/0:2.02	0/0:1.96	0/1:0.88	0/1:1.08	0/0:2.02	0/0:2.16	0/0:2.18	0/0:2.02	0/0:2.22	0/0:2.04	0/0:2.1	0/1:0.86
1	12144501	0.0551133	0.0334268	NONE(dist=NONE),TRNAS-GGA(dist=1394407)	intergenic	1:12144501-12153500	CN0	0.873353	0/0:2.12	0/0:1.94	0/0:2.22	0/0:1.94	0/1:0.98	0/0:1.98	0/1:1.1	0/0:2.12	0/1:1.04	0/1:1.06	0/1:0.82	0/0:2.0	0/1:0.98	0/1:0.86	0/0:2.14	0/0:1.94	0/0:2.12	0/1:0.82	0/0:1.82	0/0:2.16	0/0:2.12	0/0:2.12	0/0:2.16	0/0:2.04	0/0:2.26	0/1:1.08	1/1:0.0	0/0:1.96	0/0:1.74	0/0:1.7	1/1:0.0	1/1:0.0	1/1:0.0	0/1:1.06	0/1:1.12	0/0:1.86	0/0:2.0	0/0:1.94	1/1:0.0	0/1:1.02	0/1:0.88
1	12582501	0.00398928	0.00820744	NONE(dist=NONE),TRNAS-GGA(dist=957907)	intergenic	1:12582501-12590000	CN0	0.832201	0/0:2.08	0/0:2.12	0/0:2.12	0/1:1.1	0/0:2.16	0/0:1.9	0/0:2.12	0/1:1.4	0/1:1.06	0/0:2.0	0/0:1.9	0/1:1.18	0/0:2.12	0/0:2.48	0/0:2.34	0/0:1.96	0/1:1.2	0/0:2.28	0/0:2.18	0/1:1.14	0/1:1.0	0/0:1.98	0/0:2.1	0/1:1.36	0/0:2.52	0/1:1.26	0/0:1.9	0/1:1.06	0/0:1.96	0/0:1.98	0/0:2.02	0/0:1.82	0/0:1.8	0/0:1.94	0/1:1.16	0/0:2.04	0/0:2.02	0/0:2.08	0/1:1.0	0/0:2.1	0/0:1.86
1	12626001	0.0203206	0.0208841	NONE(dist=NONE),TRNAS-GGA(dist=912407)	intergenic	1:12626001-12635500	CN0	0.855254	0/0:2.02	0/0:1.98	0/0:1.86	0/1:1.0	0/0:1.88	0/0:2.08	0/0:1.98	0/1:1.0	0/0:2.22	0/0:1.84	0/0:1.84	0/1:1.12	0/0:2.1	0/0:2.26	0/0:2.1	0/0:2.22	0/1:1.04	0/0:2.14	0/0:1.88	0/1:1.0	0/1:1.24	0/0:2.06	0/0:2.0	0/1:1.18	0/0:2.08	0/1:1.04	0/0:1.96	0/0:1.88	0/0:2.22	0/0:1.9	0/0:2.02	0/0:1.8	0/0:2.0	0/0:1.98	0/0:2.0	0/0:1.96	0/0:1.8	0/0:1.94	0/0:1.84	0/0:1.9	0/0:2.3
1	12640001	0.0357026	0.00317579	NONE(dist=NONE),TRNAS-GGA(dist=898907)	intergenic	1:12640001-12649000	CN2,CNH	0.849223	0/0:2.08	2/2:7.02	0/0:2.4	2/2:7.32	0/0:1.72	0/0:1.82	0/0:1.92	0/0:2.36	0/0:2.12	0/0:1.8	0/0:1.96	0/0:2.08	0/0:1.92	0/0:2.24	0/0:2.04	0/0:1.98	2/2:6.64	0/0:2.26	1/2:5.74	0/0:2.1	0/0:2.18	0/0:1.96	0/0:2.1	0/0:2.2	1/2:5.44	0/0:2.1	0/0:2.0	2/2:9.34	0/0:2.06	0/0:1.84	0/0:2.02	0/0:1.78	0/0:1.96	0/0:2.06	0/0:2.02	0/0:1.98	0/0:2.0	0/0:2.0	0/0:1.98	0/0:2.04	0/0:2.28
1	13523001	0.00170973	0.000522962	NONE(dist=NONE),TRNAS-GGA(dist=21907)	intergenic	1:13523001-13526000	CN0,CN2	0.734227	1/1:0.16	1/1:0.16	0/1:1.3	0/2:2.82	0/1:0.98	0/0:2.24	0/0:1.68	0/0:2.3	1/1:0.14	0/0:1.82	0/0:2.22	0/1:0.98	1/1:0.14	0/1:0.82	1/1:0.1	0/1:1.06	0/0:2.38	1/1:0.16	0/0:2.08	0/1:1.2	0/0:2.06	1/1:0.16	0/0:1.9	0/1:1.06	1/1:0.2	0/0:2.14	0/0:1.88	1/1:0.1	1/1:0.14	1/1:0.14	0/1:1.34	0/1:1.14	0/0:2.06	0/0:2.0	0/0:1.98	1/1:0.36	1/1:0.32	1/1:0.14	1/1:0.28	0/1:1.18	0/1:0.7
1	15710501	0.0137553	-0.000970771	NCAM2(dist=1257273),TMPRSS15(dist=1436749)	intergenic	1:15710501-15715000	CN0,CN2	0.727391	1/1:0.06	0/0:2.02	0/1:1.06	0/0:1.92	0/0:1.98	0/2:2.84	0/0:2.02	0/1:1.16	0/1:1.12	0/0:1.96	0/0:2.0	0/0:2.14	0/0:2.1	0/1:1.2	0/0:2.36	0/0:2.0	0/1:1.04	0/1:1.3	1/1:0.1	0/1:0.98	0/1:1.32	0/1:1.08	0/1:1.18	0/0:2.2	0/0:1.86	0/1:1.32	0/0:2.24	0/1:1.2	0/0:2.32	0/0:2.02	0/0:2.06	0/0:1.94	0/0:2.12	0/0:2.32	0/0:1.98	0/0:2.04	0/0:1.94	0/0:2.02	0/0:2.04	0/0:2.16	0/2:3.12
1	15950001	-0.00571491	0.00236142	NCAM2(dist=1496773),TMPRSS15(dist=1196749)	intergenic	1:15950001-15955000	CN0	0.91338	1/1:0.08	0/1:1.12	0/1:1.04	1/1:0.08	1/1:0.06	0/1:1.32	0/0:2.34	1/1:0.0	0/1:1.26	0/1:1.18	1/1:0.08	0/1:1.0	1/1:0.12	1/1:0.08	1/1:0.16	1/1:0.04	1/1:0.0	0/1:1.52	1/1:0.06	0/1:1.36	1/1:0.08	0/1:1.12	1/1:0.06	1/1:0.08	1/1:0.06	1/1:0.22	1/1:0.12	0/1:1.24	0/0:1.9	1/1:0.04	0/0:1.92	0/1:1.12	0/0:1.84	0/0:2.06	0/0:2.04	0/0:1.96	0/0:1.78	0/0:1.9	1/1:0.0	0/0:2.02	0/1:1.08
1	17437501	0.0296366	0.0319192	CHODL(dist=105558),C1H21orf91(dist=390541)	intergenic	1:17437501-17446000	CN0	0.804738	0/0:2.2	0/0:2.16	0/0:1.82	0/0:2.28	0/0:2.04	0/0:2.02	0/0:2.26	0/0:2.2	0/0:2.16	0/0:1.92	0/0:2.12	0/0:2.3	0/0:2.2	0/0:2.12	0/0:2.36	0/0:2.2	0/0:1.98	0/0:2.24	0/0:2.34	0/0:2.06	0/0:2.16	0/0:2.46	0/0:2.22	0/0:1.98	0/0:2.16	0/0:2.18	0/0:1.78	0/0:2.26	0/0:1.9	0/0:2.06	0/0:1.94	0/0:1.78	0/0:2.2	0/0:1.88	0/0:2.22	0/0:1.88	0/0:1.96	0/0:2.2	0/0:2.06	0/0:1.96	0/0:1.78
1	22314501	-0.0108156	-0.0046842	LIPI(dist=668549),ROBO2(dist=703295)	intergenic	1:22314501-22317000	CN2,CNH	0.661199	0/0:2.14	0/0:2.16	0/1:2.6	0/0:2.22	0/0:1.88	0/0:2.34	0/0:2.02	0/0:1.6	1/2:5.56	0/1:3.0	0/0:2.5	0/0:2.02	0/0:2.38	0/0:2.02	0/0:1.66	0/0:2.06	0/1:2.98	0/0:1.62	0/1:3.36	0/1:2.68	0/0:2.04	0/0:2.28	0/0:1.94	0/0:1.94	0/0:2.08	1/2:5.38	0/0:2.0	0/0:2.16	0/0:1.98	0/0:1.62	0/0:2.4	0/0:2.28	0/0:2.1	0/0:2.3	0/0:2.18	0/0:2.14	0/0:2.4	0/0:2.02	0/0:2.26	0/1:2.58	0/0:2.4
1	25797501	0.0288354	0.017693	ROBO1	intronic	1:25797501-25803500	CN0	0.840472	0/1:0.98	0/0:1.82	0/0:2.02	0/0:1.92	0/1:0.78	0/0:1.94	0/1:1.04	0/0:2.0	0/1:1.0	0/0:2.04	0/0:2.06	0/1:1.1	0/0:1.84	0/0:1.9	0/0:2.0	0/0:1.84	0/0:1.88	0/0:1.78	0/0:1.96	0/0:1.84	0/0:2.08	0/1:1.1	0/1:1.14	0/0:2.04	0/1:1.04	0/0:1.92	0/0:2.06	0/1:0.92	1/1:0.04	0/0:1.92	0/0:2.16	0/0:1.72	0/1:0.9	0/0:1.92	0/0:1.84	1/1:0.0	0/1:0.96	0/0:1.92	1/1:0.0	1/1:0.0	0/1:1.24
1	27997501	0.0833264	0.0321099	GBE1	intronic	1:27997501-28005500	CN2,CNH	0.662986	0/0:2.3	0/1:3.18	0/1:2.6	0/0:2.38	0/0:2.2	0/0:2.1	0/0:2.36	0/0:2.36	0/0:2.12	0/1:2.58	0/1:2.9	0/0:2.38	0/0:2.18	0/1:3.34	0/0:2.26	0/0:1.96	0/0:1.9	0/1:2.5	0/0:2.26	0/0:2.4	0/0:2.34	0/0:2.18	0/0:2.32	0/0:2.02	0/1:2.54	0/0:2.38	0/1:2.72	0/1:2.7	0/1:2.68	0/0:2.18	0/0:1.88	0/0:2.18	0/0:2.22	0/0:2.32	0/0:2.04	0/0:2.04	0/0:2.06	0/0:2.08	0/1:3.1	0/0:2.1	0/0:2.12
1	28974501	-0.00202482	-0.00550036	GBE1(dist=839796),TRNAS-GGA(dist=1260432)	intergenic	1:28974501-28977000	CN0,CN2	0.652732	0/0:1.86	0/0:1.82	0/0:1.54	0/0:2.22	0/0:1.78	0/0:2.44	0/0:1.78	0/2:2.82	0/0:1.86	0/0:2.3	0/2:2.78	0/0:2.0	0/0:1.94	0/2:2.72	0/0:1.88	0/0:2.1	0/0:1.8	0/0:1.84	2/2:3.7	0/0:1.84	0/0:1.66	0/0:1.66	0/2:2.7	0/0:1.8	0/0:1.52	0/0:2.24	0/0:1.88	0/0:1.56	0/0:2.04	0/0:1.66	0/0:1.78	0/0:1.96	0/0:1.9	0/0:2.04	0/0:1.9	0/0:1.84	0/0:2.38	0/0:2.0	0/0:1.98	0/0:1.78	0/2:2.72
1	30241501	0.0516545	0.0328082	TRNAS-GGA(dist=3998),CADM2(dist=1355011)	intergenic	1:30241501-30247500	CN0	0.811046	0/0:2.06	0/0:1.92	0/0:1.8	0/0:1.96	0/0:2.1	0/0:2.24	0/0:2.12	0/1:1.3	0/1:1.1	0/0:2.32	0/0:2.1	0/1:1.22	0/0:2.14	0/0:2.3	0/0:2.16	0/1:1.12	0/0:1.92	0/0:2.14	0/0:1.8	0/0:2.44	0/0:2.42	0/1:1.22	0/0:1.96	0/0:2.1	0/0:2.08	0/0:2.2	0/0:2.04	0/1:1.18	0/0:2.0	1/1:0.02	0/0:1.92	0/0:1.86	0/0:1.86	0/0:1.98	0/1:0.86	0/0:2.12	0/1:1.18	0/0:1.82	0/1:0.98	0/0:1.8	0/1:0.98
1	32263501	0.0110997	-0.0021106	CADM2	intronic	1:32263501-32271000	CN0,CN2	0.65909	0/0:2.24	0/0:2.12	0/1:1.32	0/0:2.38	0/0:1.8	0/0:1.86	0/0:2.1	0/1:1.5	0/0:1.96	0/1:1.4	0/1:1.3	0/0:2.02	0/0:2.02	0/0:2.22	1/1:0.56	0/0:1.96	0/1:1.38	0/1:1.44	0/0:2.1	0/0:2.1	0/0:2.24	0/0:1.88	0/1:1.34	0/0:2.06	0/0:2.48	0/0:2.26	0/0:2.16	0/0:2.12	0/0:1.8	0/0:1.88	0/0:2.06	0/0:2.22	0/0:1.98	0/0:2.26	0/0:1.94	0/0:2.04	0/0:2.12	0/0:1.84	0/0:1.88	0/0:2.04	0/1:1.3
1	32972001	-0.0111638	-0.000596548	CADM2(dist=73969),LOC108636757(dist=788252)	intergenic	1:32972001-32976000	CN2,CNH	0.662793	0/0:2.06	0/0:2.04	0/1:2.5	0/0:2.06	0/0:2.0	0/0:2.16	0/0:2.4	0/1:2.58	0/0:2.44	0/0:1.96	0/0:2.28	0/0:2.24	0/1:3.2	0/0:2.22	0/1:2.66	0/1:2.76	0/0:2.22	0/0:2.32	0/0:1.66	0/1:3.3	0/0:2.12	0/0:2.3	0/0:2.24	0/0:2.14	0/1:3.26	0/0:2.22	0/0:2.28	0/0:2.36	0/0:2.0	0/0:1.98	0/0:1.94	0/0:1.72	0/0:1.88	0/0:2.28	0/0:1.96	0/0:2.18	0/0:2.06	0/0:1.86	0/0:1.96	0/0:2.1	0/0:2.3
1	34023001	0.0119787	0.0458684	VGLL3(dist=88360),CHMP2B(dist=171883)	intergenic	1:34023001-34027500	CN0,CN2	0.658413	0/0:2.32	0/0:2.26	0/0:2.42	0/2:3.32	0/2:3.42	0/2:3.52	0/2:3.46	0/2:2.88	0/0:2.3	0/0:2.0	0/0:2.34	0/2:3.06	0/0:2.42	0/2:2.54	0/0:2.22	0/0:2.36	0/0:2.14	0/0:2.26	0/0:2.02	0/2:2.64	0/0:2.2	0/0:2.34	0/0:2.26	0/0:2.0	0/0:2.44	0/2:2.54	0/2:3.1	0/0:2.38	0/0:2.16	0/0:1.86	0/0:2.04	0/0:1.76	0/0:1.96	0/1:1.22	0/0:2.44	0/0:2.16	0/0:2.16	0/0:2.42	0/0:1.8	0/0:2.22	0/0:1.9
1	42246501	-0.00855902	-0.00363388	LOC102188532(dist=12622),LOC102188800(dist=17330)	intergenic	1:42246501-42258500	CN0	0.884749	0/0:1.92	0/0:2.18	0/0:2.06	0/0:2.04	0/0:1.98	0/0:1.9	0/0:2.08	0/0:2.28	0/1:0.98	0/0:2.08	0/1:0.9	0/0:1.94	0/0:2.08	0/0:2.02	0/0:2.0	0/0:2.04	0/0:2.08	0/0:2.0	0/0:2.22	0/0:2.14	0/0:2.02	0/0:1.92	0/0:2.04	0/0:2.06	0/0:1.86	0/0:1.96	0/0:2.0	0/0:2.1	0/0:1.94	0/0:2.04	0/0:1.98	0/0:2.14	0/0:2.02	0/0:1.9	0/0:2.02	0/0:2.1	0/0:1.8	0/0:2.02	0/0:2.06	0/0:2.02	0/0:2.04
1	42485501	-0.00247294	-0.00207727	LOC102191272(dist=12080),LOC102168202(dist=5849)	intergenic	1:42485501-42488000	CN0,CN2	0.671587	0/1:1.26	1/1:0.26	0/0:1.82	0/0:1.94	0/1:1.14	0/1:0.9	0/1:0.82	0/0:2.02	0/1:1.26	0/0:2.1	0/0:1.7	0/1:1.26	1/1:0.38	0/1:1.08	0/0:1.62	0/0:1.96	0/0:1.78	0/2:2.56	0/2:2.56	0/1:1.44	0/0:2.28	0/0:2.08	0/0:1.98	0/0:2.22	0/2:2.4	1/1:0.52	0/0:1.68	0/1:1.12	0/0:1.7	1/1:0.46	0/0:1.98	1/1:0.62	1/1:0.4	0/1:1.36	0/0:1.7	0/1:1.32	0/1:1.42	0/1:1.14	0/0:1.8	0/1:0.98	0/1:0.88
1	46603501	0.0113678	0.0134959	LOC106503198(dist=218896),ZPLD1(dist=25418)	intergenic	1:46603501-46606000	CN2	0.662817	0/0:2.32	0/0:2.0	0/0:1.92	0/1:2.88	0/0:2.1	1/1:3.98	0/0:1.94	0/0:2.16	0/0:2.14	0/0:2.32	0/0:2.1	0/0:2.26	0/1:2.88	0/1:3.32	0/0:2.04	0/0:2.02	0/1:2.7	0/0:1.8	0/0:2.54	0/0:2.26	0/1:2.82	0/0:2.38	0/0:2.12	0/0:2.16	0/0:2.52	0/0:2.4	0/0:2.24	0/0:2.46	0/0:2.0	0/0:1.78	0/0:2.24	0/0:1.96	0/0:1.8	0/0:1.72	0/0:2.14	0/0:1.96	0/0:2.16	0/0:1.8	0/0:1.62	0/0:1.84	0/0:1.74
1	48361501	-0.00426863	0.00873684	TRNAC-GCA(dist=1388428),ALCAM(dist=1463499)	intergenic	1:48361501-48371000	CN0	0.843979	0/0:2.22	0/1:1.04	0/0:1.92	0/0:2.02	0/1:0.98	0/0:2.36	0/0:2.2	0/0:2.18	0/1:1.22	0/0:2.36	0/0:2.24	0/0:2.3	0/0:1.92	0/0:2.04	0/0:2.12	0/1:1.0	0/0:2.0	0/0:2.0	0/0:2.22	0/0:2.18	0/0:2.38	0/0:2.18	0/0:2.02	0/0:1.9	0/0:2.26	0/0:2.18	0/0:2.24	0/0:2.18	0/0:2.3	0/0:1.7	0/1:1.04	0/0:1.86	0/0:1.78	0/0:1.96	0/0:1.9	0/0:2.04	0/1:0.98	0/0:2.16	0/1:0.84	0/0:2.2	0/1:1.14
1	48574501	-0.00348279	-0.0021803	TRNAC-GCA(dist=1601428),ALCAM(dist=1257499)	intergenic	1:48574501-48577000	CN2,CNH	0.651689	0/0:1.86	0/0:2.04	0/0:1.94	0/0:2.14	0/0:2.08	0/0:1.8	0/0:2.12	0/0:1.74	0/1:3.16	0/1:2.52	0/1:2.56	0/0:2.1	0/0:1.94	0/1:2.8	0/0:1.98	0/0:1.92	0/0:2.36	0/0:1.14	0/0:1.96	0/0:1.72	0/0:1.9	0/0:1.98	0/0:2.0	0/0:1.88	0/1:2.72	0/0:1.4	0/0:1.96	0/0:1.68	0/0:2.12	0/0:1.8	0/0:2.02	0/0:1.76	0/0:1.98	0/0:1.82	0/0:1.86	0/0:1.98	0/0:1.8	0/0:1.68	0/0:1.92	0/0:1.92	0/1:3.2
1	56576001	0.0118734	0.0228029	TMPRSS7	intronic	1:56576001-56579500	CN0,CN2	0.671093	0/1:1.14	0/2:2.48	0/2:2.84	0/0:2.36	0/1:1.16	0/0:2.36	0/0:2.22	0/1:1.4	0/0:2.08	0/0:2.4	0/2:2.78	0/0:2.02	0/0:2.22	0/1:1.18	0/0:2.14	0/1:1.26	0/1:0.82	0/0:2.38	0/0:2.24	0/0:2.24	0/1:1.06	0/0:2.36	0/0:2.18	0/0:2.0	0/1:1.26	0/0:2.38	0/0:2.3	0/0:2.08	0/2:2.52	0/0:2.08	0/0:2.1	0/0:1.78	0/0:2.36	0/0:1.78	0/1:1.02	0/1:1.08	0/1:0.9	0/0:2.08	0/0:2.06	0/0:2.0	0/0:2.28
1	56843001	0.040711	0.0216886	CD200(XM_018065468.1:c.-25621_-25602delins0)	UTR5	1:56843001-56847000	CN2,CNH	0.682076	0/0:1.98	0/0:2.06	0/0:1.78	1/1:3.76	0/0:1.98	0/0:1.84	0/0:2.08	0/1:2.26	0/0:1.84	0/1:3.16	0/0:1.8	2/2:5.84	0/0:1.84	0/0:1.72	0/0:2.12	0/0:2.0	0/1:2.92	0/0:1.64	1/1:3.78	0/1:3.34	1/1:4.44	0/0:2.08	1/1:3.86	0/1:3.12	0/0:1.78	0/1:3.14	0/1:3.34	0/0:1.78	0/1:2.38	0/0:1.7	0/0:2.0	0/0:1.96	0/0:2.1	0/1:2.26	0/1:2.4	0/1:2.6	0/1:2.38	0/1:3.38	0/0:2.0	1/1:3.56	1/1:3.86
1	56915501	0.0480278	0.0519745	LOC102173607	exonic	1:56915501-56918000	CN0,CN2	0.656309	0/0:2.64	0/1:1.28	0/1:1.22	0/0:2.42	0/0:2.06	0/0:2.2	0/0:2.3	0/0:2.16	0/0:2.44	0/0:2.22	0/0:2.64	0/0:2.24	0/1:1.44	0/0:2.0	0/0:2.24	1/1:0.34	0/1:1.56	0/1:1.62	0/0:2.0	0/0:1.88	0/0:2.22	0/0:2.08	0/1:1.32	0/0:1.96	0/0:1.9	0/0:1.96	0/0:2.66	0/0:2.32	0/0:2.28	0/0:2.1	0/1:0.98	0/0:2.18	0/0:2.14	0/0:1.98	0/0:2.08	0/0:2.18	0/0:1.8	0/0:1.96	0/1:1.46	0/0:2.04	0/1:1.3
1	63651001	0.114198	0.0737894	IGSF11(dist=40934),C1H3orf30(dist=7326)	intergenic	1:63651001-63657000	CN2	0.746996	0/0:2.16	0/0:2.28	0/1:2.44	0/1:2.64	0/0:2.24	0/0:1.64	0/0:2.18	1/1:4.14	0/0:2.14	0/0:1.94	0/0:2.32	0/0:2.0	0/0:2.02	0/0:1.92	0/0:2.22	0/0:2.12	0/0:1.7	0/0:2.26	0/1:3.0	0/0:2.22	0/1:3.06	0/1:3.02	0/0:2.12	0/1:3.08	0/1:3.22	0/1:3.38	0/1:3.08	0/0:2.04	0/0:1.6	0/0:2.0	0/0:1.98	0/0:1.96	0/0:2.04	0/0:2.08	0/0:2.08	0/0:1.96	0/0:1.94	0/0:2.2	0/0:2.08	0/0:1.88	0/0:1.5
1	65857501	-0.00296736	-0.00335928	GOLGB1	exonic	1:65857501-65861000	CN2	0.672772	0/0:2.24	0/0:1.78	0/0:2.26	0/0:2.18	0/0:2.18	0/0:2.3	0/0:2.26	0/0:2.32	0/0:2.3	0/0:2.16	0/0:2.52	0/0:2.16	0/0:1.94	0/0:2.06	0/0:2.26	0/0:2.18	0/0:2.2	0/0:2.24	0/0:2.38	0/0:2.2	0/0:2.22	0/0:2.22	0/0:2.16	0/0:2.4	0/0:2.48	0/0:2.3	0/0:2.08	0/0:2.0	0/0:1.96	0/1:2.6	0/0:2.24	0/0:2.54	0/0:1.82	0/0:2.28	0/0:2.18	0/0:1.82	0/0:2.34	0/0:2.1	0/0:2.32	0/0:2.24	0/0:2.16
1	74048501	0.0784589	0.0710024	HRASLS(dist=128254),MB21D2(dist=184973)	intergenic	1:74048501-74052500	CN0,CN2	0.707505	0/0:2.16	0/0:2.08	0/1:1.12	0/1:1.4	0/1:1.3	0/0:1.92	0/0:2.28	0/0:2.32	0/0:2.14	0/1:0.98	0/0:2.12	0/0:2.14	0/0:2.0	0/0:2.06	0/0:2.34	0/0:2.06	0/0:2.24	0/0:1.62	0/0:2.0	0/0:2.1	0/0:2.06	0/0:2.16	0/0:2.12	0/0:2.5	0/2:2.88	0/0:2.4	0/0:1.98	0/0:2.34	0/0:1.98	0/1:1.08	0/0:2.04	0/1:0.98	0/0:2.06	0/0:1.94	0/1:1.18	0/0:2.06	0/1:0.92	1/1:0.08	0/0:2.22	0/1:1.0	0/1:1.24
1	80034501	-0.00197135	-0.00210842	ST6GAL1(dist=14248),TRNAK-UUU(dist=27536)	intergenic	1:80034501-80043500	CN2,CNH	0.81171	0/0:2.32	0/0:2.12	0/0:2.32	0/0:2.48	0/0:2.5	0/0:2.44	0/0:2.16	0/0:2.26	0/1:3.18	0/0:2.2	0/0:2.22	0/0:2.14	0/0:2.08	0/0:2.38	0/0:2.32	0/0:2.32	0/0:2.16	0/0:2.2	0/0:2.42	0/0:2.16	0/0:2.32	0/0:2.18	0/0:2.28	0/0:2.22	0/0:2.08	0/0:2.2	0/0:2.12	0/0:2.4	0/0:2.24	0/0:2.3	0/0:2.1	0/0:2.3	0/0:2.24	0/0:2.12	0/0:2.14	0/0:2.24	0/0:2.0	0/0:2.02	0/0:2.28	0/0:2.12	0/0:2.18
1	81519001	0.000492959	0.00151677	MAP3K13	intronic	1:81519001-81526000	CN0,CN2	0.739396	0/0:2.1	0/0:2.14	0/0:1.94	0/0:2.16	0/0:2.28	0/0:2.08	0/0:1.96	0/0:2.16	0/0:2.1	0/0:2.1	0/0:2.12	0/0:2.18	0/1:1.04	0/0:1.94	0/0:1.92	0/0:2.14	0/0:2.18	0/1:0.98	0/0:2.04	0/0:2.46	0/0:1.96	0/0:1.92	0/1:0.98	0/0:2.14	0/0:2.06	0/0:2.1	0/0:1.9	0/0:2.06	0/0:2.14	0/0:2.22	0/0:1.88	0/0:2.18	0/0:2.26	0/0:2.18	0/0:2.1	0/0:2.06	0/0:2.26	0/0:2.0	0/0:2.08	0/0:1.9	0/0:2.24
1	85618001	0.00934277	0.0131337	TRNAS-GGA(dist=386110),DNAJC19(dist=128661)	intergenic	1:85618001-85622500	CN0	0.803139	0/0:2.08	0/0:1.88	0/1:1.0	0/0:1.9	0/0:2.26	0/1:1.06	0/0:2.34	0/0:2.58	0/0:2.22	0/0:1.8	0/0:2.4	0/1:1.1	0/0:2.12	0/0:2.06	0/0:2.28	0/0:2.12	0/0:1.68	0/0:2.32	0/0:2.2	0/0:1.86	0/0:2.22	0/0:2.24	0/1:1.08	0/0:2.26	0/1:1.14	0/0:2.34	0/0:2.22	0/0:2.22	0/1:1.08	0/0:1.92	0/0:2.0	0/0:2.1	0/0:2.02	0/0:1.82	0/0:1.8	0/0:2.12	0/0:1.9	0/0:2.2	0/0:2.08	0/0:2.06	0/0:1.74
1	86646501	0.0128272	0.0134313	TTC14(dist=550516),PEX5L(dist=51401)	intergenic	1:86646501-86658000	CN0	0.936002	0/1:1.2	1/1:0.0	1/1:0.0	0/1:1.12	0/0:2.1	1/1:0.0	0/1:1.1	0/0:2.46	0/0:2.02	0/1:1.1	1/1:0.04	0/1:1.16	0/0:2.1	0/1:1.08	1/1:0.02	1/1:0.0	0/1:1.2	0/0:2.3	0/0:2.18	1/1:0.0	0/1:1.2	0/0:2.18	1/1:0.02	0/1:0.96	0/0:2.06	0/1:1.06	0/1:1.18	0/0:2.48	1/1:0.0	0/1:0.94	0/1:1.0	0/0:1.94	0/1:1.0	0/1:1.28	1/1:0.0	1/1:0.0	1/1:0.0	0/1:0.96	1/1:0.0	1/1:0.0	0/0:2.06
1	90430001	-0.00833399	-0.00523634	TBL1XR1(dist=768230),NAALADL2(dist=451862)	intergenic	1:90430001-90435000	CN0	0.827759	0/0:2.04	1/1:0.06	1/1:0.0	0/0:2.2	0/1:1.14	1/1:0.04	1/1:0.06	0/1:1.24	0/0:2.14	0/0:2.5	0/1:0.94	0/0:2.02	1/1:0.08	0/1:0.92	0/0:2.2	0/1:1.14	0/1:0.86	0/1:0.92	0/0:2.32	1/1:0.06	0/1:1.16	0/0:2.08	0/0:2.14	0/0:2.0	0/0:1.54	0/1:1.04	0/0:2.48	0/1:1.28	0/1:1.12	0/0:1.84	0/1:1.02	0/0:1.86	1/1:0.02	0/1:1.12	0/0:1.92	0/1:1.1	0/1:0.94	0/1:1.04	0/0:1.62	0/1:0.96	0/1:1.2
1	91025001	0.0219591	-0.00218648	NAALADL2	intronic	1:91025001-91031500	CN0	0.797318	0/0:2.18	0/0:2.18	0/0:1.82	0/0:2.16	0/0:1.76	0/0:2.34	0/1:1.02	0/0:1.82	0/0:1.96	0/0:2.42	0/0:2.08	0/0:2.2	1/1:0.0	0/1:1.02	0/0:1.8	0/0:2.04	0/0:2.06	0/1:1.02	0/0:2.14	0/1:1.18	0/1:1.2	0/0:1.88	0/0:2.02	0/0:2.14	0/0:2.3	0/1:1.08	0/0:1.96	0/0:1.98	0/0:2.0	0/0:1.78	0/0:2.26	0/0:2.16	0/0:1.98	0/0:2.02	0/0:2.14	0/0:1.98	0/0:2.06	0/0:2.24	0/0:2.1	0/0:2.08	0/1:1.02
1	103651501	0.0763074	0.035804	SI(dist=1731050),TRNAW-CCA(dist=1678762)	intergenic	1:103651501-103656000	CN0,CN2	0.764844	0/1:1.26	1/1:0.08	1/1:0.0	1/1:0.2	0/1:1.12	0/1:1.22	0/1:1.1	1/1:0.16	0/1:1.04	1/1:0.14	0/1:1.06	0/1:1.06	0/1:1.08	0/1:1.06	0/0:2.0	0/0:1.84	1/1:0.12	1/1:0.04	0/1:1.1	0/1:1.06	0/1:1.4	0/1:1.08	0/1:1.2	1/1:0.32	0/1:1.46	1/1:0.1	0/0:1.74	0/1:0.82	0/0:1.72	0/0:1.7	0/0:2.04	0/0:1.9	0/1:1.08	1/1:0.06	0/0:2.16	1/1:0.06	0/1:0.94	1/1:0.08	0/0:1.86	1/1:0.08	1/1:0.04
1	104288001	0.00316488	-0.000765577	NONE(dist=NONE),TRNAW-CCA(dist=1043262)	intergenic	1:104288001-104291500	CN0	0.814253	1/1:0.12	0/1:1.12	0/1:1.18	1/1:0.0	1/1:0.14	0/0:1.76	0/1:1.28	1/1:0.24	0/0:2.3	0/0:2.26	1/1:0.0	1/1:0.06	0/1:1.18	0/1:0.98	0/1:1.24	1/1:0.04	1/1:0.04	0/1:1.0	0/0:2.16	0/0:1.66	0/1:1.34	0/1:1.3	0/1:1.22	1/1:0.04	1/1:0.14	0/0:2.16	1/1:0.0	1/1:0.04	1/1:0.08	0/0:1.72	1/1:0.02	1/1:0.0	1/1:0.04	0/0:2.52	0/0:2.14	0/0:1.96	0/0:2.08	0/0:2.26	0/0:1.78	0/0:1.8	0/1:1.16
1	104380501	0.0202514	0.0358465	NONE(dist=NONE),TRNAW-CCA(dist=948262)	intergenic	1:104380501-104386500	CN0	0.793871	0/0:2.16	0/0:1.98	0/0:2.42	0/0:2.36	0/0:1.82	0/0:2.5	0/0:2.22	0/0:2.22	0/0:2.3	0/0:2.32	0/1:0.9	0/0:2.24	0/0:2.12	0/0:2.32	0/0:2.4	0/0:1.92	0/0:1.92	0/0:2.14	0/0:2.24	0/0:2.48	0/0:2.36	0/0:2.1	0/0:2.02	0/0:2.08	0/0:2.1	0/0:2.28	0/0:2.44	0/0:2.28	0/0:2.02	0/0:1.8	1/1:0.06	0/0:1.96	0/1:1.24	0/0:1.96	0/0:2.3	0/0:1.9	0/0:2.0	0/0:2.16	0/0:1.9	0/0:2.16	0/0:1.82
1	108620001	0.0274254	0.00443641	RSRC1	intronic	1:108620001-108624500	CN0,CN2	0.665522	0/0:2.16	0/0:2.18	0/0:1.84	0/0:2.24	0/0:2.16	0/0:1.96	0/0:1.98	0/0:1.94	0/0:1.9	0/2:2.58	0/0:1.8	0/0:2.16	0/0:2.12	0/0:1.34	0/0:1.96	0/1:0.96	0/0:2.2	0/0:2.14	0/0:2.28	0/0:2.06	0/0:2.22	0/0:2.18	0/0:2.04	0/0:2.02	0/0:2.26	0/0:1.76	0/0:2.12	0/0:2.08	0/0:1.98	0/0:1.98	0/0:1.96	0/0:2.4	0/0:1.84	0/0:2.16	0/0:2.24	0/0:2.02	0/0:2.18	0/0:2.18	0/0:2.0	0/0:1.98	0/0:1.94
1	112291501	0.165696	0.0573346	MME(dist=81329),TRNAR-UCU(dist=166274)	intergenic	1:112291501-112297500	CN0	0.814049	0/1:1.06	0/0:2.02	0/0:2.14	0/1:0.88	1/1:0.06	1/1:0.0	1/1:0.06	0/0:2.44	0/0:2.14	0/1:1.4	0/0:2.14	0/0:2.08	0/0:2.12	0/1:1.1	0/1:1.28	0/0:1.96	0/0:1.94	0/1:1.16	0/1:1.4	0/0:2.44	0/1:1.24	0/1:1.14	1/1:0.04	0/1:1.18	0/1:1.24	0/1:1.24	0/1:1.36	0/1:1.04	0/0:1.96	0/0:2.12	0/0:1.88	0/0:1.76	0/0:2.04	0/0:1.8	0/1:1.1	0/0:1.98	0/1:0.98	0/0:2.16	0/1:0.98	1/1:0.0	0/0:2.22
1	114293001	-0.00772748	-0.00179442	RAP2B(dist=78101),P2RY1(dist=271590)	intergenic	1:114293001-114296000	CN0,CN2	0.723273	0/1:0.92	0/1:0.94	0/0:1.96	0/0:2.06	0/0:1.66	0/1:1.36	0/0:1.88	0/0:2.06	0/1:1.26	0/0:1.78	0/0:2.34	0/0:1.92	0/0:2.02	0/1:1.4	0/0:1.86	0/0:2.06	0/0:2.02	0/0:2.42	0/0:2.04	0/0:2.02	0/0:2.12	0/0:2.08	0/0:1.96	0/0:2.16	0/0:1.7	0/0:1.94	0/0:2.12	0/0:1.94	0/0:1.84	0/0:1.8	0/0:2.2	0/0:2.1	0/1:0.86	0/0:2.1	1/1:0.0	0/1:0.88	0/1:0.86	1/1:0.0	0/0:1.88	0/1:1.4	0/2:3.18
1	114587001	0.153231	0.0565232	P2RY1(dist=12897),LOC106502324(dist=46836)	intergenic	1:114587001-114591500	CN2,CNH	0.652384	0/0:2.24	1/2:5.48	0/0:1.42	0/0:1.72	0/0:2.06	0/0:1.58	0/0:2.1	0/0:2.16	2/2:7.04	0/0:1.68	0/0:1.92	0/0:2.08	0/0:1.94	0/1:2.7	0/0:2.06	0/0:2.14	0/0:2.04	0/0:2.26	0/0:2.22	0/0:2.3	0/0:2.4	0/0:2.18	0/0:1.98	0/0:2.1	0/0:1.86	0/0:2.04	0/0:2.0	0/0:1.72	0/0:2.08	0/0:1.98	0/0:2.26	0/0:1.84	0/0:1.88	0/0:2.04	0/0:2.02	0/0:1.96	0/0:1.84	0/0:1.86	0/0:1.92	0/0:1.86	0/0:2.26
1	116098501	-0.00650364	-0.00127219	LOC102178896(dist=145023),LOC108636081(dist=79418)	intergenic	1:116098501-116101500	CN0	0.799381	1/1:0.2	0/1:1.16	1/1:0.36	1/1:0.22	1/1:0.32	1/1:0.18	1/1:0.3	1/1:0.42	1/1:0.36	1/1:0.42	1/1:0.42	1/1:0.1	1/1:0.34	0/1:0.72	1/1:0.36	0/1:1.04	1/1:0.26	0/0:1.68	1/1:0.14	1/1:0.28	1/1:0.3	0/1:0.52	1/1:0.22	0/1:0.56	1/1:0.36	0/1:1.16	1/1:0.44	1/1:0.34	1/1:0.4	0/1:1.02	1/1:0.4	1/1:0.18	1/1:0.34	0/0:2.16	1/1:0.28	1/1:0.24	1/1:0.16	1/1:0.32	1/1:0.28	1/1:0.22	1/1:0.28
1	116170501	-0.00214992	-0.0028358	LOC102178896(dist=217023),LOC108636081(dist=4918)	intergenic	1:116170501-116176000	CN0	0.79581	0/0:2.02	0/0:1.98	0/0:2.4	0/1:1.14	0/0:2.0	0/0:2.12	0/0:1.94	0/0:1.78	0/0:1.92	0/0:1.84	0/0:2.28	0/0:1.98	0/0:1.9	0/0:1.68	0/0:1.94	0/0:1.92	0/0:1.7	0/1:1.4	0/0:2.46	0/0:1.96	0/0:1.98	0/0:2.1	0/0:2.14	0/1:1.2	0/0:1.84	0/0:2.14	0/0:1.98	0/0:2.0	0/0:2.1	0/0:2.24	0/0:2.16	0/0:2.06	0/0:2.08	0/0:1.98	0/0:2.06	0/0:2.06	0/0:1.86	0/1:1.14	0/1:1.04	0/0:1.92	0/1:1.06
1	117963501	0.0535914	0.0267465	ANKUB1	downstream	1:117963501-117967000	CN0	0.69925	0/1:1.28	0/0:1.98	0/0:2.02	0/0:1.98	0/0:2.18	0/0:2.12	0/0:1.74	0/0:2.46	0/0:1.78	0/0:1.98	0/0:2.1	0/0:2.02	0/0:1.98	0/1:1.02	0/0:2.28	0/0:1.68	0/0:1.86	0/0:1.64	0/0:2.12	0/0:2.02	0/0:2.1	0/0:2.18	0/0:1.96	0/0:1.94	0/0:2.22	0/0:2.08	0/0:2.16	0/0:2.18	0/0:2.08	0/0:1.94	0/0:1.92	0/0:1.82	0/0:2.3	0/0:1.8	0/0:2.26	0/1:1.2	0/0:1.54	0/0:2.1	0/0:1.84	0/0:1.94	0/0:1.68
1	119565501	-0.0102925	-0.00251296	LOC102174436(dist=264892),LOC108636913(dist=392805)	intergenic	1:119565501-119570500	CN0	0.823819	0/0:2.0	0/1:1.26	0/0:1.88	0/1:1.2	0/0:2.14	0/1:1.28	0/1:1.16	1/1:0.06	1/1:0.06	0/0:2.42	0/0:2.18	0/0:2.12	0/0:2.22	0/0:2.06	0/0:2.58	1/1:0.06	0/0:1.94	0/1:1.04	0/0:1.86	0/0:2.04	0/0:2.2	0/0:2.44	0/0:2.04	0/1:1.08	0/0:2.04	0/0:2.3	0/0:2.2	0/0:2.02	0/0:2.02	0/1:0.98	1/1:0.04	1/1:0.04	1/1:0.06	0/1:0.98	0/1:1.02	0/1:1.28	1/1:0.04	0/1:1.1	1/1:0.02	1/1:0.04	0/1:1.08
1	123188001	0.0218409	0.00516944	PLOD2(dist=1147104),C1H3orf58(dist=1252707)	intergenic	1:123188001-123190500	CN0,CN2	0.758214	1/1:0.22	1/1:0.12	0/0:1.82	0/2:3.1	0/0:2.06	0/0:1.74	0/1:0.88	0/0:1.58	1/1:0.08	0/1:0.92	0/0:2.14	0/1:1.06	0/0:1.58	0/0:2.14	0/0:1.66	0/1:1.0	0/1:1.04	0/0:2.2	0/0:1.52	0/1:0.86	0/0:1.94	0/0:2.08	0/1:1.08	0/0:2.16	0/1:0.98	0/1:1.24	0/0:1.56	0/1:0.94	0/1:1.16	0/1:1.04	0/1:1.14	0/1:0.98	1/1:0.06	0/1:1.0	0/1:1.36	0/1:0.98	0/0:1.52	0/1:1.36	1/1:0.1	0/0:1.7	0/1:0.9
1	123194001	-0.00496377	-0.00223588	PLOD2(dist=1153104),C1H3orf58(dist=1246207)	intergenic	1:123194001-123197000	CN0,CN2	0.795831	1/1:0.04	1/1:0.02	0/0:1.82	0/1:1.06	0/1:0.96	0/1:1.18	0/1:1.26	0/1:1.04	1/1:0.02	0/1:1.12	0/0:1.92	0/1:1.02	0/0:2.04	0/0:1.94	0/0:1.98	0/1:1.0	0/1:1.14	0/0:2.0	0/0:2.26	0/1:1.1	0/0:2.32	0/0:1.7	0/1:1.0	0/1:0.96	0/1:1.0	0/1:1.3	1/1:0.0	0/1:0.72	0/1:0.84	0/1:0.82	0/1:1.12	0/1:0.82	1/1:0.0	0/0:1.86	0/1:0.98	0/1:1.06	0/0:2.16	0/1:0.94	1/1:0.0	0/0:1.94	0/1:0.94
1	123197501	-0.00737465	-0.00363065	PLOD2(dist=1156604),C1H3orf58(dist=1243707)	intergenic	1:123197501-123199500	CN0	0.749383	1/1:0.02	1/1:0.02	0/0:2.08	0/1:1.0	0/1:0.74	0/1:1.14	0/1:0.86	0/1:1.0	1/1:0.02	0/1:0.74	0/0:1.56	0/1:0.92	0/0:1.64	0/1:1.32	0/0:1.82	0/1:1.02	0/1:0.76	0/0:2.08	0/1:1.38	0/1:0.66	0/0:1.62	0/0:1.52	0/1:0.96	0/1:1.04	0/1:0.62	0/1:0.88	1/1:0.0	0/1:0.86	0/1:0.64	0/1:0.84	0/1:0.72	0/1:0.82	1/1:0.04	0/0:1.66	0/1:0.74	0/1:0.74	0/0:1.44	0/1:0.9	1/1:0.02	0/0:1.5	0/1:1.0
1	129423501	0.834565	0.732903	MRPS22(dist=122790),LOC102190268(dist=172336)	intergenic	1:129423501-129435000	CN0	0.828611	1/1:0.3	1/1:0.36	1/1:0.34	1/1:0.2	1/1:0.42	1/1:0.26	1/1:0.4	1/1:0.3	1/1:0.32	1/1:0.34	1/1:0.2	1/1:0.32	1/1:0.32	1/1:0.3	1/1:0.44	1/1:0.28	1/1:0.24	1/1:0.18	1/1:0.5	1/1:0.36	1/1:0.32	1/1:0.4	1/1:0.38	1/1:0.3	1/1:0.18	1/1:0.28	1/1:0.2	1/1:0.24	1/1:0.24	0/0:1.96	0/0:2.2	0/0:1.88	0/0:2.26	0/0:2.06	0/0:2.26	0/0:2.16	0/0:1.82	0/0:2.24	0/0:2.22	0/0:2.08	0/0:2.42
1	132502501	-0.00214065	-0.000958064	PCCB	intronic	1:132502501-132507500	CN0,CN2	0.684091	0/0:2.04	0/1:1.14	0/0:2.06	0/0:2.1	0/2:2.48	0/0:2.16	0/0:2.34	0/0:2.26	0/0:2.04	0/1:1.22	0/0:1.96	0/0:2.16	1/1:0.12	0/1:1.08	0/0:2.28	0/0:2.2	0/1:1.16	0/1:1.38	1/1:0.14	0/0:2.1	0/0:1.84	0/0:2.22	0/1:1.32	0/0:2.14	0/0:1.9	0/0:1.72	1/1:0.0	0/0:2.0	0/0:2.02	1/1:0.0	0/1:1.14	1/1:0.04	0/0:2.06	0/1:1.24	0/1:1.24	0/0:1.96	0/1:1.2	0/1:1.32	0/0:2.14	0/1:1.24	0/1:1.22
1	138266501	0.00747888	0.027542	NEK11	intronic	1:138266501-138269500	CN0,CN2	0.663488	0/1:1.32	1/1:0.18	0/0:1.92	0/0:1.96	0/0:2.28	0/0:1.96	0/1:1.3	0/0:2.4	0/1:1.18	0/0:2.18	0/0:2.22	0/0:2.54	1/1:0.32	0/0:2.4	0/0:2.42	0/1:1.52	0/2:2.84	0/1:1.58	0/0:2.24	0/0:2.02	0/1:1.3	0/0:2.38	0/0:2.26	0/0:2.06	0/0:2.0	0/0:1.92	0/0:2.4	0/2:2.82	0/0:2.32	0/0:2.22	0/1:0.8	0/0:1.84	1/1:0.2	0/1:1.14	0/1:1.02	0/1:1.0	0/1:0.92	0/1:1.2	0/0:1.76	0/1:0.84	1/1:0.32
1	141337501	0.00552175	0.0226822	TMPRSS2(dist=8327),LOC108636430(dist=98277)	intergenic	1:141337501-141343500	CN2	0.783248	0/0:1.92	0/0:2.08	0/0:2.18	0/1:3.02	0/0:2.36	0/0:2.16	0/1:3.4	0/1:3.06	0/0:2.2	0/0:1.92	0/0:2.18	0/0:2.48	0/0:2.04	0/0:2.34	0/0:2.36	0/1:3.2	0/0:2.26	0/0:2.1	0/0:2.2	0/1:2.88	0/0:2.0	0/0:2.02	0/0:2.22	0/0:2.36	0/0:1.96	0/0:1.96	0/0:1.82	0/0:2.34	0/1:3.32	0/0:2.12	0/0:1.98	0/0:1.82	0/0:2.14	0/0:1.86	0/0:2.04	0/0:2.02	0/0:1.78	0/0:2.14	0/0:2.04	0/0:1.78	0/0:1.96
1	141734001	0.00139998	0.00470093	C2CD2	exonic	1:141734001-141736500	CN0	0.70859	0/1:0.94	0/1:0.7	0/1:0.88	0/1:0.78	0/1:0.9	0/1:0.84	0/1:0.88	0/1:1.08	0/0:1.64	0/1:0.9	0/1:0.72	0/1:0.9	0/1:1.02	0/1:0.78	0/1:0.92	0/0:1.64	0/1:0.68	0/1:0.72	0/1:1.18	0/1:1.04	0/1:0.96	0/1:0.94	0/1:1.02	0/1:1.02	0/1:0.88	0/0:1.58	0/1:0.78	0/1:0.78	0/1:1.12	0/1:0.76	0/1:0.68	0/1:0.9	0/1:0.64	0/1:1.26	0/1:0.64	0/1:0.7	0/1:0.8	0/1:0.7	0/1:0.86	0/1:0.76	0/1:0.94
1	144407001	0.0378285	-0.00164491	LOC108636554	exonic	1:144407001-144416000	CN0,CN2	0.784079	0/0:2.12	0/0:2.24	0/0:2.12	0/1:1.24	0/0:2.46	0/0:2.22	0/0:2.34	0/0:2.28	0/0:2.24	0/1:1.18	0/0:2.32	0/0:2.3	0/0:2.14	0/0:2.52	0/0:2.44	0/0:2.24	0/1:1.14	0/0:1.98	0/0:2.48	0/0:1.86	0/1:1.14	0/0:2.24	0/0:2.18	0/1:1.42	0/0:2.52	0/1:1.32	0/0:2.32	0/0:2.06	0/0:2.28	0/0:2.18	0/0:2.08	0/0:1.86	0/0:2.02	0/0:2.18	0/0:2.1	0/0:2.0	0/0:1.98	0/2:3.34	0/1:1.08	0/0:2.16	1/1:0.18
1	144419501	0.0378285	-0.00105206	LOC108636551	exonic	1:144419501-144426500	CN0,CN2	0.760067	0/0:2.22	0/0:2.12	0/0:2.26	0/1:1.02	0/0:2.58	0/0:2.22	0/0:2.12	0/0:2.46	0/0:2.38	0/1:1.42	0/0:2.14	0/0:2.0	0/0:1.98	0/0:2.16	0/0:2.38	0/0:2.16	0/1:1.3	0/0:2.44	0/0:2.08	0/0:2.08	0/1:1.1	0/0:2.1	0/0:2.14	0/1:1.2	0/0:2.16	0/1:1.24	0/0:1.96	0/0:2.22	0/0:1.96	0/0:2.08	0/0:2.22	0/0:1.78	0/0:2.22	0/0:2.04	0/0:2.08	0/0:2.06	0/0:1.9	0/2:3.04	0/1:1.3	0/0:2.14	1/1:0.02
1	146334001	0.0181196	0.00502919	PRMT2(dist=26414),FBXO25(dist=115171)	intergenic	1:146334001-146337000	CN0	0.652703	0/1:1.2	0/0:1.56	0/0:1.74	0/1:1.0	0/0:1.62	0/1:1.08	0/0:1.66	0/0:2.0	0/0:1.84	0/0:1.72	0/0:1.56	0/1:1.16	0/1:1.12	0/0:1.74	0/0:1.62	0/1:1.38	0/1:1.16	0/0:1.5	0/1:0.88	0/1:1.4	0/1:1.0	0/0:1.92	0/0:1.56	0/1:1.14	0/0:1.72	0/1:1.16	0/1:1.24	0/0:1.5	0/0:1.74	0/1:0.98	0/0:1.88	0/1:1.14	0/1:1.04	0/1:1.12	0/1:0.98	0/1:1.04	0/1:1.0	0/0:1.44	0/1:1.4	0/1:1.06	0/0:1.58
1	146627501	0.0671098	0.0346637	TDRP(dist=98907),LOC102177758(dist=136306)	intergenic	1:146627501-146632500	CN0	0.843729	0/1:1.16	1/1:0.02	0/1:1.04	0/1:1.1	1/1:0.02	0/1:1.04	0/1:1.08	0/0:2.06	0/1:0.94	0/0:1.98	0/0:2.24	1/1:0.04	0/1:1.12	0/1:0.9	1/1:0.02	1/1:0.02	0/0:1.62	0/1:1.08	0/0:1.78	1/1:0.0	0/1:1.08	0/1:1.08	1/1:0.04	1/1:0.02	1/1:0.0	0/0:2.24	0/1:1.1	0/1:1.04	0/1:1.2	0/1:0.9	0/0:2.06	0/0:2.02	0/0:1.98	0/0:1.62	0/0:2.24	0/0:1.8	0/1:1.04	0/0:2.08	0/0:2.06	0/0:1.8	1/1:0.04
1	148395501	-0.00875007	-0.00203151	LOC108636584	exonic	1:148395501-148398000	CN0	0.699068	1/1:0.22	1/1:0.44	0/1:0.64	1/1:0.26	1/1:0.32	1/1:0.3	1/1:0.44	1/1:0.24	1/1:0.22	0/1:0.74	1/1:0.32	0/1:0.74	0/1:0.8	1/1:0.38	1/1:0.36	1/1:0.38	1/1:0.54	1/1:0.5	1/1:0.4	1/1:0.26	1/1:0.34	1/1:0.36	1/1:0.34	1/1:0.4	1/1:0.46	0/1:0.92	0/1:0.76	1/1:0.42	1/1:0.34	1/1:0.28	1/1:0.3	1/1:0.26	0/1:0.62	1/1:0.42	1/1:0.5	1/1:0.34	0/1:0.62	1/1:0.4	1/1:0.3	1/1:0.54	1/1:0.32
1	150333501	0.830614	0.740499	ERG,KCNJ15	exonic	1:150333501-150818500	CN2	0.842819	1/1:4.02	1/1:3.72	1/1:3.84	1/1:4.0	1/1:3.84	1/1:3.78	1/1:3.82	1/1:4.12	1/1:3.8	1/1:4.08	1/1:3.92	1/1:3.96	1/1:3.92	1/1:3.98	1/1:3.92	1/1:3.78	1/1:3.92	1/1:3.8	1/1:3.88	1/1:3.96	1/1:3.8	1/1:3.84	1/1:3.72	1/1:4.22	1/1:3.82	1/1:3.9	1/1:4.04	1/1:4.06	1/1:3.94	0/0:2.04	0/0:2.08	0/0:1.86	0/0:2.22	0/0:1.88	0/0:1.94	0/0:1.96	0/0:1.94	0/0:1.92	0/0:1.92	0/0:1.96	0/0:1.98
1	151614001	-0.00352651	0.0144046	COL6A5	exonic	1:151614001-151705500	CN2	0.886781	0/0:2.06	0/0:2.0	0/0:2.04	0/0:2.18	0/0:2.16	0/0:1.98	0/0:2.18	0/0:2.38	0/0:2.02	0/0:2.26	0/0:2.12	0/1:3.18	0/0:2.0	0/0:2.06	0/1:3.34	0/0:2.08	0/0:2.14	0/0:2.18	0/0:2.08	0/0:2.12	0/0:2.06	0/0:2.04	0/0:2.04	0/1:3.06	0/0:2.18	0/0:2.2	0/1:3.2	1/1:4.4	0/0:2.06	0/0:1.96	0/0:1.88	0/0:1.78	0/0:2.0	0/0:2.04	0/0:2.12	0/0:1.96	0/0:1.84	0/0:2.12	0/0:2.06	0/0:1.96	0/0:1.96
1	154998501	-0.00991555	-0.00163453	TBC1D5(dist=473881),SATB1(dist=252093)	intergenic	1:154998501-155010500	CN2,CNH	0.764318	0/0:2.26	0/1:3.18	0/0:2.4	0/1:2.78	0/0:2.08	0/0:2.3	0/0:2.32	0/0:2.24	0/0:2.1	0/0:2.46	0/0:2.42	0/0:2.4	0/0:2.18	0/1:2.7	0/0:2.34	0/0:2.2	0/0:2.36	0/0:2.38	0/0:2.18	0/0:2.42	0/0:2.3	0/0:2.36	0/0:2.18	0/0:2.24	0/0:2.36	0/0:2.06	0/1:3.36	0/0:2.16	0/0:2.26	0/0:2.14	0/0:2.12	0/0:2.06	0/0:2.18	0/0:2.04	0/0:2.14	0/0:1.98	0/0:2.0	0/0:2.24	0/0:1.9	0/1:3.26	0/0:1.9
10	2450501	0.115179	0.0557325	FOXN3(dist=48958),LOC108636902(dist=13090)	intergenic	10:2450501-2452500	CN0,CN2	0.650917	0/0:1.84	0/0:2.02	0/0:1.66	0/0:1.84	0/0:1.96	0/1:1.26	0/1:1.08	0/0:1.64	0/0:1.66	0/0:1.7	0/0:2.1	0/0:1.96	0/1:0.88	0/1:0.66	0/0:1.78	0/0:1.8	0/0:1.86	0/1:1.28	0/0:2.48	0/0:2.12	0/1:0.76	0/0:1.9	1/1:0.0	0/1:1.08	1/1:0.06	0/0:1.6	0/1:1.32	0/1:0.86	0/1:0.98	0/0:2.1	0/0:1.96	0/0:1.92	0/0:1.62	0/0:2.12	0/0:1.9	0/0:2.48	0/0:1.66	0/0:1.92	0/0:1.88	0/0:1.96	0/0:1.86
10	2453001	0.0915188	0.0256147	FOXN3(dist=51458),LOC108636902(dist=9590)	intergenic	10:2453001-2456000	CN0,CN2	0.693226	0/0:2.18	0/0:2.2	0/0:1.94	0/0:1.8	0/0:2.08	0/1:1.1	0/1:1.16	0/0:2.54	0/0:2.36	0/0:2.4	0/0:2.56	0/0:2.1	0/1:1.12	0/0:2.14	0/0:1.9	0/0:2.38	0/0:2.18	0/1:1.28	0/0:1.72	0/0:1.94	0/1:1.2	0/0:2.2	1/1:0.1	0/1:1.16	1/1:0.1	0/0:2.18	0/0:2.38	0/1:1.22	0/1:1.02	0/0:2.1	0/0:2.22	0/0:1.88	0/0:2.0	0/0:2.22	0/0:1.98	0/0:2.32	0/0:2.08	0/0:2.24	0/0:2.32	0/0:2.1	0/0:2.12
10	3080001	0.0903261	0.0773307	SPATA7	exonic	10:3080001-3086000	CN2	0.708648	0/0:2.02	0/0:1.88	0/0:2.18	0/0:2.22	0/0:2.18	0/0:1.7	0/0:2.12	0/1:2.72	0/0:2.14	0/0:1.82	0/0:1.88	0/0:2.14	0/0:2.32	0/0:1.7	0/0:2.16	0/0:2.02	0/0:2.36	0/0:1.96	0/0:1.94	0/0:2.32	0/0:2.04	0/0:2.16	0/0:2.08	0/0:1.9	0/0:2.08	0/0:2.1	0/0:2.26	0/0:2.0	0/0:1.74	0/1:3.34	0/1:2.84	0/1:2.96	0/1:2.66	0/1:2.7	0/1:2.58	0/1:3.04	0/1:2.66	0/1:2.58	0/1:2.82	0/1:2.86	0/0:2.52
10	3471001	-0.0105541	-0.00428365	GALC(XM_018053889.1:c.-5097_-4851delins0)	UTR5	10:3471001-3476500	CN0	0.868385	0/0:1.98	1/1:0.08	0/0:2.14	1/1:0.06	1/1:0.06	0/1:1.14	0/1:1.28	1/1:0.1	1/1:0.04	0/1:1.14	1/1:0.08	0/1:1.28	0/1:1.1	0/0:1.66	1/1:0.08	0/1:1.18	0/0:2.08	0/1:1.32	1/1:0.06	0/0:2.26	0/0:1.94	1/1:0.06	0/1:1.06	0/0:2.0	1/1:0.08	0/1:1.18	0/1:1.38	0/1:1.04	0/0:2.4	0/1:1.14	0/1:0.92	1/1:0.02	0/0:2.2	0/0:1.88	0/0:1.92	1/1:0.04	0/1:1.24	0/1:1.04	0/1:1.12	0/1:1.2	1/1:0.1
10	5064001	0.000739332	-0.00131464	GALC(dist=1539908),TRNAW-CCA(dist=295162)	intergenic	10:5064001-5070000	CN2	0.715852	0/0:2.44	0/0:2.18	0/1:2.64	0/0:2.18	0/0:2.22	0/0:2.4	0/1:3.1	0/1:2.64	0/0:2.18	0/0:2.32	0/0:2.38	0/0:2.32	0/0:2.18	0/0:2.2	0/0:2.5	0/0:2.22	0/0:2.26	0/0:2.18	0/0:2.08	0/0:2.18	0/0:2.16	0/0:2.4	0/0:2.26	0/0:2.16	0/0:2.2	0/0:2.56	0/0:2.22	0/0:2.5	0/0:2.38	0/0:2.08	0/0:2.08	0/0:1.76	0/0:2.12	0/0:2.1	0/0:2.14	0/0:1.86	0/0:1.92	0/0:2.24	0/0:2.08	0/0:2.0	0/0:1.92
10	11873001	0.044311	0.0100837	DIO2(dist=249325),NRXN3(dist=110296)	intergenic	10:11873001-11875500	CN0,CN2	0.652912	0/0:1.92	0/0:1.98	0/1:1.18	0/1:1.4	0/1:1.32	0/1:1.48	0/0:2.3	0/1:1.1	0/0:2.14	0/0:2.06	0/1:1.3	0/1:1.1	0/0:2.12	0/0:1.9	0/0:2.22	0/0:2.1	0/0:1.64	0/0:2.14	0/1:1.0	0/0:2.02	0/1:1.16	0/0:2.08	0/0:2.12	0/1:1.38	0/1:1.52	0/1:1.3	0/0:2.48	0/0:2.62	0/1:1.36	0/1:1.12	0/0:2.12	0/0:1.6	0/0:1.96	0/0:2.02	0/1:1.4	0/1:1.24	0/0:2.1	0/0:2.2	0/0:2.14	0/0:2.44	0/0:1.72
10	13453501	0.0582256	0.0308924	NRXN3	intronic	10:13453501-13456500	CN0,CN2	0.738623	0/0:2.1	0/0:2.12	0/0:2.0	0/0:2.22	0/0:1.9	0/0:2.54	0/0:2.06	0/1:1.3	0/0:2.24	0/0:1.96	0/0:2.14	0/0:1.98	0/0:2.14	0/1:0.74	0/0:2.12	0/1:1.06	0/0:2.34	0/0:2.26	0/0:2.02	0/0:2.34	0/0:1.74	0/0:2.02	0/0:2.1	0/1:1.12	0/0:1.9	0/0:1.98	0/0:2.5	0/0:2.22	0/0:1.6	0/0:1.9	0/0:1.82	0/0:2.12	1/1:0.02	0/0:2.14	0/0:2.24	0/0:1.56	1/1:0.02	0/0:1.98	0/0:2.0	0/0:1.76	0/0:2.1
10	24478001	0.0135118	0.015564	GPHN	intronic	10:24478001-24483500	CN0	0.813699	0/0:1.98	0/0:2.14	0/0:2.12	0/0:2.14	0/0:2.32	0/0:2.46	0/0:2.12	0/1:1.24	0/0:2.1	0/0:2.42	0/0:2.48	0/0:2.04	0/0:2.02	0/0:2.08	0/0:2.28	0/0:2.12	0/1:1.02	0/0:2.26	0/0:2.24	0/0:2.1	0/0:2.2	0/0:2.26	0/0:2.18	0/0:2.0	0/0:2.34	0/0:2.56	0/1:1.0	0/0:1.88	0/0:1.9	1/1:0.04	0/0:2.16	0/0:2.24	0/0:2.14	0/0:1.88	0/0:2.16	0/0:1.96	0/0:1.72	0/0:2.32	0/0:1.92	0/0:1.94	0/0:2.08
10	27279501	-0.00880155	-0.00395165	WDR89(dist=2931),PPP2R5E(dist=36523)	intergenic	10:27279501-27284500	CN0	0.708209	0/0:1.72	1/1:0.4	0/1:1.3	0/1:1.54	0/1:1.48	0/1:1.62	0/1:1.2	0/0:2.42	1/1:0.4	0/1:0.56	0/1:1.38	1/1:0.42	1/1:0.42	0/1:0.6	0/1:1.54	0/1:1.22	1/1:0.24	0/1:1.58	0/1:0.5	0/0:2.18	1/1:0.42	0/1:1.16	0/1:1.26	0/1:0.54	1/1:0.38	1/1:0.44	0/0:1.82	0/0:2.32	0/1:1.58	1/1:0.12	1/1:0.34	1/1:0.32	0/1:1.14	1/1:0.38	1/1:0.42	1/1:0.44	0/1:1.08	1/1:0.34	1/1:0.28	0/1:1.36	0/1:0.54
10	28339501	-0.00719683	-0.00459897	TRNAC-GCA(dist=7741),LOC102181690(dist=566136)	intergenic	10:28339501-28345500	CN0,CN2	0.804665	0/0:2.12	0/0:1.88	0/0:2.24	0/0:2.22	0/1:1.04	0/0:1.8	0/0:2.14	0/1:1.2	0/0:2.1	0/1:1.38	0/0:2.22	0/0:2.16	0/0:2.0	0/1:1.24	0/0:2.18	0/0:1.96	0/0:2.12	0/0:2.18	1/1:0.0	0/0:2.24	0/1:1.2	0/1:1.06	0/1:1.18	0/1:1.34	0/1:0.9	0/1:1.04	0/0:2.4	1/1:0.04	0/0:2.32	0/1:0.94	0/1:1.14	0/0:1.94	0/0:1.9	0/0:2.22	0/0:2.26	0/0:1.96	0/1:1.0	0/1:1.16	0/0:1.92	0/0:2.22	0/0:1.7
10	28356501	-0.00719683	-0.0050659	TRNAC-GCA(dist=24741),LOC102181690(dist=544136)	intergenic	10:28356501-28367500	CN0	0.869819	0/0:2.04	0/0:2.1	0/0:2.1	0/0:2.08	0/1:1.04	0/0:1.84	0/0:2.14	0/1:1.2	0/0:2.2	0/1:1.28	0/0:2.18	0/0:2.06	0/0:2.04	0/1:1.12	0/0:2.16	0/0:2.08	0/0:2.18	0/0:2.26	1/1:0.08	0/0:2.16	0/1:1.14	0/1:1.16	0/1:1.08	0/1:1.34	0/1:0.9	0/1:1.16	0/0:2.34	1/1:0.06	0/0:2.24	0/1:1.0	0/1:1.08	0/0:1.96	0/0:1.98	0/0:2.18	0/0:2.2	0/0:1.88	0/1:1.0	0/1:1.1	0/0:2.04	0/0:2.12	0/0:1.98
10	37398001	0.00233761	0.00748907	LOC108636981(dist=154390),DDHD1(dist=47336)	intergenic	10:37398001-37403000	CN0	0.816951	0/1:1.06	0/1:1.02	0/0:2.02	0/0:1.96	0/0:2.1	0/0:2.36	0/1:1.12	0/0:2.4	0/1:1.0	0/1:1.08	0/0:2.1	0/1:0.9	0/0:2.24	0/0:1.92	0/0:2.0	0/0:2.12	0/0:2.02	0/0:2.26	0/0:2.0	0/0:1.94	0/0:1.96	0/1:1.02	0/0:1.8	0/0:2.02	0/1:1.14	0/1:1.24	0/1:1.12	0/1:1.12	0/0:2.14	0/1:1.08	0/0:1.74	0/0:1.52	0/0:1.92	0/1:0.82	0/0:1.92	0/0:2.0	0/0:2.04	0/0:2.04	0/0:2.08	0/1:0.98	0/0:2.16
10	37460001	-0.00895886	-1.23331e-05	DDHD1	intronic	10:37460001-37468500	CN0	0.861892	0/0:2.08	0/0:2.02	0/0:1.94	0/1:1.08	0/0:1.98	0/1:1.0	0/0:2.0	1/1:0.0	0/0:1.94	0/0:1.84	0/0:1.9	0/0:1.94	0/0:2.04	0/0:1.82	0/0:1.88	0/0:2.14	1/1:0.0	0/0:2.02	0/0:2.22	0/0:2.04	0/0:2.1	0/0:1.96	0/1:0.88	0/0:2.0	0/0:1.64	0/0:2.0	0/0:1.92	0/0:1.86	0/0:2.0	0/0:2.06	0/0:1.9	0/0:2.06	0/0:2.16	0/0:2.16	0/0:2.04	0/0:2.16	0/0:1.98	0/0:2.1	0/0:1.9	0/0:2.1	0/0:1.8
10	42295001	0.0152794	-0.00182959	FAM227B	intronic	10:42295001-42299500	CN0	0.669575	0/0:2.24	0/0:2.2	0/0:2.12	0/0:1.92	0/0:1.72	0/0:1.82	0/0:1.96	0/0:1.96	0/0:1.94	0/0:1.76	0/0:2.0	0/0:2.02	0/0:1.94	0/0:2.24	0/0:1.94	0/0:2.04	0/0:2.2	0/0:2.02	0/0:1.98	0/1:1.28	0/0:2.06	0/1:1.26	0/0:2.04	0/0:2.04	0/0:1.74	0/0:2.0	0/0:2.32	0/0:2.04	0/0:1.9	0/0:1.98	0/0:2.06	0/0:2.42	0/0:1.9	0/0:1.94	0/0:2.14	0/0:2.08	0/0:2.06	0/0:2.1	0/0:2.24	0/0:2.06	1/1:0.56
10	42751001	-0.00305964	-0.00180144	ATP8B4	intronic	10:42751001-42761000	CN2,CNH	0.848583	0/0:2.0	2/2:6.04	0/0:2.3	0/0:2.22	0/0:2.04	0/0:2.02	0/0:2.02	0/0:2.08	1/1:4.2	0/0:2.06	0/0:2.06	0/0:1.88	0/0:2.04	0/0:2.08	0/0:2.06	0/0:2.06	0/0:2.12	0/0:2.22	0/0:2.06	0/0:1.96	0/0:1.98	0/0:1.94	0/0:2.02	0/0:2.02	0/0:2.14	0/0:1.96	0/0:2.1	0/0:1.98	0/0:2.24	0/0:1.88	0/0:2.08	0/0:2.0	0/0:1.98	0/0:1.9	0/0:2.08	0/0:2.1	0/0:2.18	0/0:2.22	0/0:1.98	0/0:2.08	0/0:2.08
10	48315501	0.0202549	0.0181241	DYX1C1	intronic	10:48315501-48328000	CN0	0.907082	0/0:2.06	0/1:1.08	0/1:1.0	0/1:0.98	0/1:1.18	0/1:1.06	0/1:1.12	1/1:0.0	0/1:1.08	0/0:2.14	0/1:0.94	0/0:2.06	0/0:1.96	0/1:1.12	0/0:2.26	0/1:1.14	0/1:1.1	0/1:1.06	0/1:1.14	0/1:1.06	0/1:1.1	0/0:1.98	0/1:1.16	1/1:0.2	0/1:1.24	0/1:0.88	0/1:0.92	0/0:1.74	0/1:1.2	0/1:1.14	1/1:0.0	0/0:1.86	0/0:2.02	1/1:0.02	0/1:1.04	0/0:1.96	1/1:0.02	0/1:1.06	0/1:0.98	0/0:1.92	0/1:1.06
10	52710501	-0.00691243	-0.00173534	BNIP2(dist=132673),FOXB1(dist=196218)	intergenic	10:52710501-52715500	CN0	0.80388	0/0:2.08	0/0:2.02	0/1:1.08	0/0:2.54	0/0:2.26	0/1:1.26	0/1:1.06	0/0:1.94	0/0:2.18	0/0:1.76	0/0:2.24	0/0:2.04	0/0:1.98	0/0:2.28	0/0:2.1	0/0:2.06	0/1:1.04	0/0:1.94	0/0:2.08	0/0:2.28	0/0:1.92	0/0:1.98	0/0:2.08	0/0:1.98	0/0:1.68	0/0:2.3	0/1:1.06	0/0:1.96	0/0:2.08	0/0:2.22	0/0:2.04	0/0:1.96	0/0:2.32	0/0:2.0	0/0:2.16	0/0:2.08	0/0:1.9	0/0:2.34	0/1:1.14	0/0:2.04	0/0:2.22
10	56779001	0.00179401	0.00240372	HERC1	exonic	10:56779001-56782000	CN0	0.752464	0/0:1.96	0/1:0.88	1/1:0.04	0/1:1.18	0/0:2.2	0/0:2.24	0/1:0.98	0/0:2.06	0/1:1.1	0/1:1.02	0/1:0.86	0/1:1.06	0/0:2.0	0/0:2.2	0/1:1.1	0/0:2.12	0/1:1.22	1/1:0.1	0/1:1.08	0/0:2.12	0/1:1.24	0/0:1.86	0/0:1.98	1/1:0.4	0/1:0.92	0/1:1.24	0/0:2.28	0/0:1.8	0/0:2.08	0/0:2.4	0/0:1.86	0/0:2.34	0/0:2.0	0/0:1.94	0/0:2.16	0/0:1.82	0/1:1.26	0/1:1.24	1/1:0.3	0/0:2.08	0/1:1.36
10	59823001	-0.00898915	-0.00237637	ATP5S,L2HGDH	exonic	10:59823001-59833000	CN2,CNH	0.662406	0/0:2.12	0/0:1.98	0/1:2.52	0/0:2.02	0/0:1.9	0/0:2.22	0/0:2.1	0/0:2.12	0/0:2.06	0/0:2.24	0/0:2.12	0/0:2.28	0/0:1.84	0/0:2.26	0/0:1.9	0/0:2.06	0/0:2.26	0/0:2.22	0/0:1.94	0/0:2.04	0/0:2.28	0/0:2.1	0/0:2.08	0/0:2.04	0/0:2.3	0/0:1.9	0/0:2.02	0/0:2.26	0/0:1.94	0/1:2.62	0/0:2.24	0/1:2.48	0/0:2.1	0/0:2.08	0/0:1.72	0/0:2.1	0/0:2.36	0/0:2.08	0/0:1.6	0/0:2.0	0/0:1.84
10	61160001	-0.00846176	0.0019271	RPS29(dist=757518),TRNAC-ACA(dist=925133)	intergenic	10:61160001-61165000	CN0	0.797207	0/1:1.02	0/0:1.86	0/0:2.12	0/0:1.84	0/0:1.92	0/1:0.98	0/1:1.08	0/0:2.08	0/0:1.98	0/0:2.0	1/1:0.0	0/1:0.98	0/0:2.2	0/0:2.54	0/0:2.08	0/0:1.92	0/0:2.0	0/1:1.0	0/1:1.06	0/1:1.2	0/0:2.08	0/0:2.28	0/1:1.1	0/1:1.2	0/0:1.6	0/0:2.22	0/0:1.96	0/0:2.26	0/1:0.98	0/0:1.74	0/1:0.84	0/0:1.74	0/0:1.78	0/0:1.96	0/0:2.02	0/0:1.8	0/0:2.06	0/0:1.9	0/0:1.64	0/1:1.12	0/1:1.02
10	61620001	-0.011036	-0.00158563	RPS29(dist=1217518),TRNAC-ACA(dist=467633)	intergenic	10:61620001-61622500	CN2	0.658114	0/0:1.96	0/0:2.22	0/0:1.72	0/0:2.04	0/0:2.1	0/0:1.48	0/0:2.18	0/0:1.88	0/0:1.82	0/0:1.84	1/1:3.62	0/0:1.9	0/0:2.24	0/0:2.32	0/0:2.16	0/0:2.38	0/0:2.02	0/1:2.68	0/0:1.98	0/0:1.9	0/0:1.96	0/0:2.16	0/0:2.12	0/0:1.78	0/0:2.3	0/0:1.52	0/0:1.98	0/0:2.24	0/0:2.36	0/0:1.76	0/1:2.62	0/0:1.88	0/0:1.98	0/0:2.0	0/0:2.22	0/0:2.02	0/0:1.78	0/0:2.42	0/0:2.28	0/0:1.84	0/1:3.28
10	68911001	0.00317398	0.00219667	RASGRP1	intronic	10:68911001-68914500	CN0,CN2	0.727483	0/0:2.1	0/1:1.0	0/0:2.18	0/0:2.34	0/0:1.88	0/0:2.36	0/0:2.2	0/0:2.06	0/0:2.16	0/0:2.1	0/0:2.16	0/0:2.02	0/0:2.02	0/0:2.0	0/1:1.14	1/1:0.02	0/0:2.16	0/2:2.82	0/0:1.78	0/0:2.06	0/0:1.88	0/0:2.22	0/0:1.96	0/0:1.82	0/0:2.0	0/0:1.96	0/0:2.04	0/0:1.88	0/0:2.1	0/0:1.9	0/0:2.12	0/0:2.46	0/0:2.24	0/0:2.38	0/0:2.0	0/0:1.86	0/0:2.18	0/0:1.82	0/0:1.94	0/0:2.2	0/0:2.2
10	74795001	0.0850646	0.0551306	LPCAT4(dist=27675),LOC102189960(dist=19496)	intergenic	10:74795001-74803500	CN2	0.657693	0/0:2.26	0/0:2.26	0/0:2.34	0/0:2.46	0/1:2.72	0/0:2.42	0/0:2.28	0/1:2.72	0/0:2.2	0/0:2.3	0/0:2.14	0/0:2.32	0/0:2.34	0/1:2.8	0/1:2.74	0/0:2.2	0/1:2.54	0/0:2.36	0/1:2.62	0/1:2.58	0/0:2.3	0/0:2.4	0/0:2.38	0/0:2.16	0/1:2.52	0/0:2.32	0/0:2.38	0/1:2.6	0/0:2.22	0/0:2.2	0/0:2.06	0/0:1.68	0/0:1.94	0/0:2.2	0/0:2.04	0/0:2.12	0/0:1.74	0/0:2.42	0/0:2.26	0/0:2.08	0/0:2.24
10	75116501	0.022003	0.0161795	LOC102188140	exonic	10:75116501-75133500	CN0	0.889417	0/0:2.1	0/0:2.0	0/0:2.24	0/0:2.08	0/0:2.0	0/0:1.96	0/0:2.16	0/0:1.98	0/0:2.02	0/0:1.88	0/0:2.3	0/0:2.0	0/0:1.98	0/0:2.04	0/0:2.06	0/1:1.02	0/0:1.96	0/0:2.1	0/0:1.84	0/0:1.9	0/0:2.06	0/0:1.96	0/0:2.08	0/0:1.94	0/0:2.04	0/0:1.94	0/0:2.02	0/0:2.0	0/0:2.02	0/0:1.88	0/0:2.14	0/0:2.16	0/0:1.94	0/0:2.04	0/0:2.06	0/0:2.02	0/0:2.0	0/0:2.02	0/1:0.98	0/0:2.06	0/0:2.32
10	75814001	0.0722252	0.0339089	LOC102178361(dist=4938),LOC102177801(dist=42643)	intergenic	10:75814001-75817000	CN0	0.719281	0/1:1.12	0/0:2.2	1/1:0.04	0/0:1.74	1/1:0.06	0/1:0.94	0/1:1.06	0/1:0.8	0/1:1.04	1/1:0.36	1/1:0.04	0/1:1.46	0/1:1.06	0/0:1.7	0/1:1.04	0/0:1.92	1/1:0.04	0/0:1.76	0/1:1.22	0/1:1.18	0/1:1.04	1/1:0.04	0/0:2.22	0/1:1.34	0/1:1.1	0/1:0.98	0/1:1.02	1/1:0.06	0/1:1.2	0/0:1.86	0/0:1.94	0/0:2.02	0/0:1.78	0/0:1.9	0/1:1.24	0/1:0.88	0/0:1.84	0/1:0.88	0/0:2.06	0/1:0.98	1/1:0.12
10	76631001	0.230661	0.110993	LOC102174664(dist=20286),LOC102174398(dist=6849)	intergenic	10:76631001-76640500	CN0	0.872975	0/0:2.16	0/1:1.1	1/1:0.08	0/0:1.9	0/0:2.28	0/1:1.24	0/1:1.1	0/1:1.54	0/0:2.06	0/1:1.08	0/1:1.14	0/0:2.1	0/1:1.08	0/0:2.2	0/0:2.18	0/0:2.04	0/1:1.06	0/0:2.18	0/1:1.14	0/0:2.12	0/1:1.02	0/1:1.1	0/0:2.14	0/1:1.18	0/1:1.1	0/1:1.22	0/0:2.18	0/1:1.1	0/1:1.14	0/0:2.04	0/0:1.78	0/0:2.32	0/0:2.04	0/0:2.1	0/0:2.04	0/0:2.36	0/0:2.0	0/1:1.12	0/0:2.18	0/0:2.04	0/0:1.96
10	88618501	-0.00880399	0.000623019	DENND4A	intronic	10:88618501-88626500	CN0,CN2,CNH	0.678169	0/2:2.72	0/0:2.0	0/0:1.76	0/0:2.04	0/2:2.76	0/0:2.18	0/0:2.02	0/0:1.64	0/2:2.56	0/0:2.1	0/2:2.56	0/0:1.94	0/2:2.78	0/2:2.64	0/2:3.0	0/0:1.78	0/2:2.58	0/0:2.06	0/2:2.6	0/0:1.78	0/0:2.22	0/0:1.96	0/0:2.06	0/0:2.0	0/0:1.86	0/0:1.82	0/0:2.0	0/0:1.98	0/0:2.18	0/0:2.32	0/0:1.96	0/0:2.0	0/0:2.3	0/0:2.04	0/0:1.98	0/0:1.92	0/0:2.12	0/0:1.96	0/0:2.22	0/0:2.04	0/2:3.1
10	94989501	-0.00774785	-0.00413893	GCNT4(dist=253055),TRNAG-CCC(dist=157074)	intergenic	10:94989501-94995000	CN0	0.85942	0/1:0.94	0/1:1.14	0/0:2.28	1/1:0.0	0/1:1.3	1/1:0.0	0/1:1.1	1/1:0.0	0/1:1.16	0/1:1.26	0/0:2.08	1/1:0.06	0/1:0.96	0/0:1.7	0/1:1.18	1/1:0.02	1/1:0.08	0/1:1.02	1/1:0.0	0/1:1.22	0/1:1.26	0/0:2.06	0/0:1.9	1/1:0.0	1/1:0.0	0/0:2.06	0/0:2.04	1/1:0.0	0/1:1.14	1/1:0.04	1/1:0.02	0/0:1.9	0/1:1.14	1/1:0.0	0/0:2.34	1/1:0.02	1/1:0.02	0/1:1.08	1/1:0.0	0/0:2.08	1/1:0.02
10	97491001	-0.000226748	-0.00421608	TRIM36(dist=239185),KCNN2(dist=321609)	intergenic	10:97491001-97493500	CN0	0.664747	0/1:0.82	0/1:0.74	0/1:0.56	0/1:0.86	0/1:0.86	0/1:0.94	0/1:0.76	0/1:1.34	0/1:0.72	0/1:1.28	0/1:1.66	0/1:0.9	0/1:0.92	0/1:1.58	0/1:0.92	0/1:0.7	0/1:0.76	0/1:1.18	0/1:1.02	0/1:1.14	0/1:0.86	0/1:1.0	0/1:0.78	0/1:0.92	0/1:0.84	0/1:0.54	0/1:0.78	0/1:1.1	0/1:0.9	0/1:0.64	0/1:1.08	0/1:1.18	0/1:1.28	0/1:1.34	0/1:1.28	0/1:1.04	0/1:0.78	0/1:1.0	0/1:1.18	0/1:1.0	0/1:1.48
10	98190501	0.00638965	0.00742161	KCNN2	intronic	10:98190501-98195500	CN0	0.837239	0/1:1.16	0/1:1.2	0/1:1.28	1/1:0.28	0/1:1.12	1/1:0.22	0/1:1.28	1/1:0.14	1/1:0.18	0/1:1.08	1/1:0.14	1/1:0.24	0/1:1.28	1/1:0.08	0/1:1.5	0/1:1.06	0/1:1.26	1/1:0.3	1/1:0.14	0/1:1.38	1/1:0.18	1/1:0.2	1/1:0.22	1/1:0.36	1/1:0.22	0/1:1.38	1/1:0.16	0/1:1.04	0/1:1.08	1/1:0.26	1/1:0.18	1/1:0.16	1/1:0.22	1/1:0.18	0/1:0.9	1/1:0.26	1/1:0.22	1/1:0.3	1/1:0.26	1/1:0.18	1/1:0.28
10	98863501	-0.00455414	-0.000285177	YTHDC2(dist=1606),NREP(dist=169404)	intergenic	10:98863501-98875000	CN0,CNH	0.816138	0/0:2.16	0/0:2.14	0/1:1.38	0/0:2.02	1/1:0.18	0/0:2.12	0/0:2.18	0/0:2.48	0/0:2.26	0/0:1.52	0/0:2.14	0/0:2.26	0/1:1.2	0/0:1.58	0/1:1.4	0/0:2.08	0/1:1.42	0/0:2.38	0/0:2.12	0/1:1.46	0/0:2.16	0/0:2.2	0/0:2.16	0/0:2.04	0/0:2.12	0/0:2.28	0/0:2.12	0/0:2.34	0/0:1.52	0/0:2.16	0/0:2.04	0/0:1.9	0/0:2.2	0/0:2.06	0/0:2.1	0/0:2.12	0/0:2.12	0/0:2.34	0/0:2.14	0/0:2.04	0/0:1.98
10	100883501	0.0160286	0.0103395	TRNAK-UUU(dist=51998),LOC106502507(dist=148002)	intergenic	10:100883501-100888500	CN0	0.782127	0/0:2.06	0/0:2.02	0/1:0.82	0/1:1.16	0/0:2.0	0/1:1.04	0/0:2.1	0/0:1.9	0/0:1.88	0/1:1.06	0/0:1.66	0/0:1.8	0/0:1.72	0/0:2.22	0/0:2.22	0/0:1.98	0/0:1.78	0/1:0.84	0/0:1.76	0/0:1.58	0/1:0.94	0/0:2.02	0/1:1.02	0/1:1.14	0/0:2.08	0/0:1.78	0/0:2.16	0/0:2.1	0/0:2.02	0/0:1.72	0/0:1.64	0/0:1.9	0/0:2.04	0/0:1.9	0/0:1.92	0/0:2.06	0/0:2.04	0/0:2.04	0/0:1.84	0/0:1.84	0/0:1.84
11	650001	-0.00393932	-0.0019918	TRNAW-CCA(dist=90865),LOC102171344(dist=61502)	intergenic	11:650001-657000	CN0	0.908856	0/0:1.98	0/1:1.08	0/1:0.98	1/1:0.0	1/1:0.0	0/0:2.24	0/0:2.0	1/1:0.0	0/0:2.2	1/1:0.0	1/1:0.0	0/1:1.1	0/0:1.96	0/1:0.82	1/1:0.02	0/1:1.14	1/1:0.0	0/1:0.88	0/1:1.02	0/1:1.12	0/1:1.02	1/1:0.02	1/1:0.0	0/1:1.1	1/1:0.0	0/1:1.12	0/1:0.98	1/1:0.0	0/1:1.02	0/0:2.22	1/1:0.0	1/1:0.0	1/1:0.0	0/1:1.18	1/1:0.0	1/1:0.0	1/1:0.0	1/1:0.0	0/0:2.12	1/1:0.0	1/1:0.0
11	3162001	-0.00118212	-0.00387821	TMEM131	intronic	11:3162001-3171500	CN2	0.839266	0/0:1.94	0/0:2.04	0/0:2.2	0/1:2.94	0/0:2.14	0/0:2.0	0/0:2.0	0/1:3.18	0/0:2.02	0/0:2.06	0/0:2.1	0/0:2.14	0/1:3.12	0/0:1.94	0/0:2.0	0/0:2.04	0/0:1.78	0/0:1.88	0/1:2.9	0/0:1.94	0/0:2.2	0/0:2.06	0/0:2.06	0/0:2.02	0/1:2.92	0/0:2.0	0/0:2.06	0/1:3.16	0/0:2.22	0/0:2.28	0/0:1.98	0/0:2.06	0/0:2.18	0/0:2.02	0/0:1.96	0/0:1.92	0/0:1.98	0/0:2.0	0/0:2.06	0/0:2.1	0/0:2.32
11	6857501	0.0251391	0.0153264	IL1R1(dist=17353),IL1RL2(dist=28219)	intergenic	11:6857501-6877000	CN0,CN2	0.826892	0/0:1.92	0/0:2.1	0/0:2.08	0/0:2.0	0/0:2.32	0/1:0.92	0/0:2.1	0/0:2.0	0/0:2.06	0/0:1.88	0/0:2.24	0/0:1.94	0/0:2.12	0/0:2.02	0/0:2.22	0/0:2.04	0/0:1.9	0/0:2.06	0/1:1.1	0/0:2.06	0/0:1.9	0/0:1.96	0/1:1.2	0/0:2.02	0/0:2.0	0/0:2.16	0/1:1.18	0/0:2.14	0/0:2.06	0/1:1.14	0/1:1.08	0/0:1.82	0/1:1.26	0/1:1.18	0/0:1.96	0/1:1.04	0/1:1.06	0/0:2.1	0/0:2.32	0/1:1.12	0/0:2.32
11	9746501	-0.00755385	-0.0029573	LOC102191530(dist=62110),SEMA4F(dist=69463)	intergenic	11:9746501-9752500	CN0	0.731937	0/0:1.74	0/1:1.2	0/1:1.1	1/1:0.46	0/0:1.96	0/1:1.0	0/1:1.12	0/0:2.12	0/0:1.64	0/0:2.02	0/0:1.98	0/0:1.84	0/0:1.76	0/0:2.1	0/0:1.9	0/0:1.78	0/0:1.82	0/1:1.28	0/1:0.84	0/0:1.86	0/0:1.76	0/1:1.14	0/0:1.88	0/0:1.64	0/1:1.12	0/1:1.48	0/0:1.72	0/1:0.9	0/0:1.82	0/0:2.04	0/0:1.96	0/0:2.06	0/0:2.06	0/0:1.98	0/0:1.88	0/0:1.78	0/0:1.98	0/0:1.74	0/0:2.08	0/0:2.04	0/0:2.1
11	18364501	0.155395	0.0585853	NONE(dist=NONE),CRIM1(dist=279767)	intergenic	11:18364501-18391000	CN0	0.91811	0/0:2.0	0/1:1.0	0/1:1.14	0/0:2.06	0/0:1.86	0/0:1.98	0/0:1.94	0/0:2.06	0/0:2.08	0/0:1.92	0/0:2.0	0/0:1.92	0/0:1.96	0/0:2.08	0/0:1.96	0/0:2.02	0/0:1.94	0/0:2.14	0/0:2.12	0/0:1.94	0/0:2.06	0/0:2.08	0/0:1.94	0/0:2.0	0/0:1.98	0/0:2.08	0/0:2.2	0/0:2.28	0/0:2.1	0/0:1.98	0/0:2.08	0/0:2.3	0/0:2.0	0/0:2.12	0/0:2.06	0/0:2.06	0/0:2.2	0/0:2.1	0/0:2.04	0/0:1.98	0/0:1.9
11	21510001	0.0472102	0.0573334	MAP4K3	intronic	11:21510001-21514500	CN0,CN2	0.710775	0/0:2.44	0/0:2.3	0/0:1.84	0/0:2.34	0/0:2.08	0/2:2.64	0/0:2.26	0/2:2.6	0/0:2.16	0/0:2.46	0/0:2.38	0/0:2.26	0/0:2.12	0/2:3.18	0/0:2.32	0/0:2.22	0/0:2.38	0/0:2.24	0/0:2.44	0/0:2.4	0/0:1.88	0/0:2.24	0/0:2.06	0/0:2.02	0/0:2.0	0/0:2.3	0/0:2.34	0/0:2.04	0/0:1.96	0/1:1.2	1/1:0.0	0/0:2.02	0/1:1.04	0/0:2.12	0/0:1.88	0/1:1.1	0/1:1.1	0/1:1.2	0/0:2.1	0/1:1.22	0/0:1.98
11	23137501	0.0250622	-0.000217281	SLC8A1(dist=492920),TRNAG-UCC(dist=604258)	intergenic	11:23137501-23144500	CN2,CNH	0.713531	0/0:1.92	0/1:3.36	0/0:1.76	0/1:2.42	0/0:1.86	0/0:1.96	0/0:1.86	0/1:2.54	0/1:2.92	0/0:1.92	0/0:2.24	0/0:2.0	0/0:1.88	0/1:2.44	0/0:2.1	0/1:3.0	0/1:3.04	1/1:3.58	0/0:1.64	0/1:2.98	1/1:3.92	0/1:3.04	1/1:3.68	0/1:2.8	0/1:3.1	0/1:3.04	0/0:1.72	0/0:2.06	0/0:2.1	0/0:1.74	0/0:1.82	0/0:1.9	0/0:2.14	0/0:2.1	0/0:2.08	0/0:1.92	0/0:1.98	0/0:2.2	0/0:2.18	0/0:1.94	0/0:2.4
11	23336001	-0.00752842	-0.00606121	SLC8A1(dist=691420),TRNAG-UCC(dist=409758)	intergenic	11:23336001-23339000	CN0,CN2	0.67752	0/0:2.04	0/0:2.04	0/0:2.02	0/0:1.82	0/0:2.06	0/0:1.8	0/0:2.18	0/1:1.36	0/0:2.14	0/0:1.7	0/0:1.94	0/0:2.04	0/0:1.92	0/0:1.98	0/0:2.18	0/1:1.04	0/0:1.98	0/0:1.58	0/2:2.9	0/0:1.62	0/0:1.96	0/0:2.06	0/0:1.9	0/0:1.84	0/0:2.08	0/0:2.34	0/0:2.04	0/0:2.06	0/0:1.9	0/0:2.02	0/0:2.02	0/0:1.66	0/0:1.88	0/0:2.32	0/0:2.02	0/0:1.84	0/0:1.9	0/0:1.76	0/0:2.04	0/0:1.98	0/1:1.22
11	23392501	0.051408	0.0180926	SLC8A1(dist=747920),TRNAG-UCC(dist=353258)	intergenic	11:23392501-23395500	CN0	0.749227	0/0:2.34	0/0:1.96	0/0:2.06	0/0:1.74	0/0:2.32	0/0:1.98	0/0:1.94	0/0:2.1	0/0:1.94	0/0:2.22	0/0:2.48	0/0:1.8	0/0:2.02	0/0:2.44	0/0:1.78	0/0:1.84	0/0:1.68	0/1:1.46	0/0:1.64	0/1:1.14	0/0:2.0	0/0:1.86	0/0:1.86	0/0:2.08	0/0:2.56	0/0:2.08	0/0:1.78	0/0:2.28	0/0:1.88	0/0:1.86	0/0:2.08	0/1:1.02	0/0:1.96	0/1:0.96	1/1:0.0	0/1:0.96	0/1:0.96	0/1:1.22	0/0:1.92	0/0:1.76	0/0:2.08
11	34160501	0.100624	0.0321207	NRXN1(dist=1094513),TRNAC-GCA(dist=548580)	intergenic	11:34160501-34168500	CN0	0.766895	0/0:2.1	0/0:2.0	0/1:1.16	0/0:2.02	0/0:1.94	0/0:2.26	0/1:1.28	0/1:1.24	0/0:2.14	0/1:1.24	0/0:2.14	0/0:2.12	0/0:2.06	0/0:1.86	0/0:2.06	0/0:2.04	0/0:1.94	0/0:1.98	0/0:1.94	0/0:2.08	0/0:2.2	0/0:2.06	0/1:1.22	0/0:2.0	1/1:0.48	0/0:2.08	0/0:1.94	0/1:1.14	0/0:2.04	0/0:1.72	0/0:2.14	0/0:1.88	0/0:1.9	0/0:1.98	0/0:1.9	0/0:2.3	0/0:1.96	0/0:2.1	0/0:1.84	0/0:1.96	0/0:2.36
11	34197501	0.0443913	0.00832989	NRXN1(dist=1131513),TRNAC-GCA(dist=515580)	intergenic	11:34197501-34201500	CN0	0.768715	0/0:1.88	0/0:2.18	0/0:2.12	0/0:2.18	0/1:1.08	0/0:2.16	0/1:1.02	0/1:1.32	0/0:1.82	0/1:1.08	0/1:0.9	0/1:1.06	0/1:1.06	0/0:2.04	0/0:2.16	0/0:1.82	0/1:1.22	0/0:1.66	0/1:1.0	0/0:2.44	0/1:1.2	0/0:2.02	0/0:2.02	0/0:2.1	0/0:2.04	0/0:2.32	0/1:1.1	0/0:2.32	0/0:1.9	0/0:1.8	0/0:1.98	0/0:1.94	0/0:1.9	0/0:1.94	0/0:1.98	0/0:1.98	0/0:1.82	0/0:1.9	0/0:1.82	0/0:1.86	0/0:2.14
11	34942501	0.115359	0.0397042	TRNAC-GCA(dist=225350),ASB3(dist=1059088)	intergenic	11:34942501-34948000	CN0	0.866945	1/1:0.36	1/1:0.26	0/1:1.32	1/1:0.1	1/1:0.28	0/1:1.16	1/1:0.22	0/1:1.32	1/1:0.14	1/1:0.2	1/1:0.16	1/1:0.18	1/1:0.28	1/1:0.36	0/1:1.38	1/1:0.12	1/1:0.24	0/1:1.6	1/1:0.12	1/1:0.26	1/1:0.26	1/1:0.34	0/1:1.26	0/1:0.94	0/0:2.14	0/1:1.44	1/1:0.1	1/1:0.12	1/1:0.12	0/1:0.92	0/1:1.22	0/1:1.28	1/1:0.22	0/1:1.1	1/1:0.12	1/1:0.12	0/0:1.96	0/1:1.22	0/1:1.02	0/0:2.16	0/0:2.48
11	46811501	0.0201943	0.00795479	LOC102184629(dist=2081),NONE(dist=NONE)	intergenic	11:46811501-46817000	CN0,CN2	0.66217	0/0:1.86	0/0:2.0	0/0:1.72	0/0:1.94	0/0:1.94	0/0:1.9	0/0:1.92	0/0:1.94	0/0:2.1	0/0:1.74	0/0:1.9	0/0:1.86	0/0:1.9	0/0:2.12	0/0:1.86	0/0:2.0	0/1:1.16	0/0:1.88	0/0:1.92	0/0:2.08	0/0:1.88	0/0:1.86	0/0:2.04	0/0:1.92	0/0:2.24	0/0:2.22	0/0:2.0	0/0:1.92	0/0:2.06	0/0:1.48	0/0:2.02	0/1:0.94	0/1:0.96	0/0:1.76	0/2:2.6	0/1:0.92	0/2:2.54	0/0:2.08	0/0:1.98	0/0:1.68	0/0:1.94
11	49910001	0.00416235	0.0296203	DNAH6	intronic	11:49910001-49913500	CN0	0.661798	0/1:1.54	0/1:1.06	0/1:0.84	0/1:1.14	0/1:0.88	0/0:2.0	0/0:1.74	0/0:1.8	0/1:1.14	0/0:1.66	0/1:0.86	0/1:1.28	0/1:1.06	0/1:0.94	0/1:0.88	0/1:1.04	0/0:2.14	0/1:0.94	0/1:1.02	0/1:0.8	0/1:0.98	0/1:1.08	0/1:0.8	0/1:1.08	0/1:0.98	0/0:2.08	0/1:0.86	0/0:2.74	0/1:1.12	0/0:2.1	0/1:0.7	0/1:0.58	0/1:0.76	0/1:0.54	0/0:1.7	0/1:0.72	0/1:0.7	0/1:0.92	0/1:0.86	0/1:1.3	0/1:0.6
11	51475001	-0.00658479	-0.000476254	SUCLG1(dist=1402363),NONE(dist=NONE)	intergenic	11:51475001-51482000	CN0	0.863305	0/1:0.96	0/1:0.98	0/0:2.02	0/0:2.04	0/0:2.0	0/0:2.14	0/0:2.22	0/1:1.2	0/1:1.0	1/1:0.0	0/0:1.84	0/1:1.02	0/0:1.96	0/0:1.92	0/0:2.16	0/0:2.02	0/1:1.0	0/0:2.26	0/0:2.1	0/1:1.1	0/0:2.22	0/0:1.98	0/0:1.96	0/0:2.0	0/1:1.14	0/1:1.18	0/0:1.8	0/1:1.14	0/0:2.24	0/0:1.94	0/0:2.02	0/0:1.84	0/0:1.98	1/1:0.0	0/1:1.12	0/1:1.04	0/0:1.94	0/0:2.1	0/1:0.96	0/0:2.14	0/1:1.12
11	52141501	-0.00769384	0.0158212	NONE(dist=NONE),NONE(dist=NONE)	intergenic	11:52141501-52145500	CN0	0.736302	0/0:2.2	0/0:2.18	0/0:1.96	0/0:2.08	0/0:2.22	0/0:2.26	0/0:2.16	0/0:2.12	0/0:1.92	0/0:2.28	0/0:2.1	0/0:2.08	0/0:2.06	0/0:2.48	0/0:2.38	0/0:2.02	0/0:2.08	0/1:1.3	0/0:2.2	0/0:2.44	0/0:2.16	0/0:2.04	0/1:1.06	0/0:2.14	0/0:1.84	0/0:2.2	0/0:1.92	0/0:2.08	0/0:2.06	0/0:1.82	0/0:2.0	0/0:1.88	0/0:1.98	0/0:2.14	0/0:2.12	0/0:2.1	0/0:2.12	0/0:1.9	0/0:1.78	0/0:1.92	0/1:1.5
11	52494001	-0.00950175	-0.00271079	NONE(dist=NONE),CTNNA2(dist=1897323)	intergenic	11:52494001-52496500	CN2,CNH	0.716112	0/0:2.1	0/0:2.06	0/0:1.8	0/1:3.1	0/0:1.76	0/0:2.32	0/0:1.86	0/0:2.06	0/0:1.96	0/0:1.56	0/0:2.2	0/0:2.02	0/0:2.36	0/0:2.28	0/0:2.12	0/0:2.2	0/0:1.86	0/1:2.72	0/0:2.12	0/1:2.86	0/0:2.2	0/0:2.32	0/0:2.04	0/0:2.42	0/0:1.96	0/0:1.88	0/0:2.3	0/0:1.94	0/0:1.88	0/0:2.04	0/0:1.8	0/0:2.2	0/0:2.0	0/0:2.26	0/0:2.14	0/0:1.9	0/0:1.88	0/0:1.78	0/0:2.04	0/0:2.16	0/0:2.32
11	52991001	0.0114888	0.0125367	NONE(dist=NONE),CTNNA2(dist=1396323)	intergenic	11:52991001-52997500	CN0	0.84425	0/0:2.02	0/1:1.12	0/0:2.24	0/0:1.88	0/0:1.98	0/0:1.62	0/0:1.96	0/0:2.08	0/0:2.14	0/0:1.86	0/0:2.06	0/0:2.12	0/0:1.98	0/0:2.12	0/0:2.38	0/0:1.94	0/0:1.92	0/0:2.26	0/1:1.34	0/0:1.7	0/0:2.24	0/0:2.16	0/0:1.96	0/0:1.98	0/0:1.88	0/0:1.96	0/0:2.06	0/0:1.94	0/0:2.26	0/0:2.08	0/0:1.9	0/0:1.78	0/0:1.88	0/0:1.94	0/0:2.12	0/0:2.1	0/0:1.78	0/0:1.92	0/0:2.12	0/0:2.08	0/1:0.94
11	53698501	-0.00371143	0.014375	NONE(dist=NONE),CTNNA2(dist=688323)	intergenic	11:53698501-53705500	CN0,CN2	0.715475	0/0:2.36	0/0:1.98	0/0:2.28	0/0:2.34	0/0:2.12	0/0:2.04	0/0:2.04	0/2:2.46	0/0:2.06	0/0:2.3	0/0:2.2	0/1:1.14	0/0:2.06	0/1:1.26	0/0:2.36	0/0:2.04	0/0:2.14	0/2:2.5	0/0:1.98	0/2:2.52	0/0:2.08	0/0:2.18	0/0:2.06	0/0:1.96	0/0:2.26	0/0:2.0	0/0:2.18	0/0:2.08	0/0:1.96	0/0:1.92	0/0:1.92	0/0:1.8	0/0:2.04	0/0:1.96	0/0:1.86	0/0:2.18	0/0:1.96	0/0:1.78	0/1:1.1	0/0:2.02	0/2:2.72
11	57821501	-0.00949062	-0.00232503	LOC102174037(dist=653974),LRRTM4(dist=395150)	intergenic	11:57821501-57825000	CN0	0.785413	0/1:1.0	0/0:2.06	0/0:2.14	0/0:2.34	0/0:2.24	0/0:2.2	0/0:2.12	0/0:2.5	0/0:2.06	0/1:1.08	0/0:2.14	0/0:1.84	0/0:2.14	0/0:1.64	0/0:2.02	0/0:1.9	0/0:1.98	0/0:2.1	0/0:2.12	0/1:1.16	0/0:1.88	0/1:0.9	0/1:1.02	0/0:2.08	0/0:2.44	0/0:2.46	0/0:2.04	0/0:2.32	0/0:2.16	0/0:1.76	0/0:2.14	0/0:1.86	0/0:2.04	0/0:2.2	0/0:2.08	0/0:1.92	0/0:2.04	0/0:2.32	0/0:1.92	0/0:1.96	0/0:2.32
11	61910001	0.0827044	0.0262768	MDH1(dist=154842),UGP2(dist=99640)	intergenic	11:61910001-61913000	CN0	0.794144	1/1:0.16	0/1:1.04	0/0:1.6	0/1:1.02	0/0:1.92	1/1:0.3	0/1:1.14	0/0:1.72	0/1:0.96	0/0:1.72	0/0:2.36	1/1:0.16	0/0:1.76	1/1:0.22	0/1:1.08	1/1:0.22	0/0:2.0	0/0:1.9	0/0:2.52	0/0:1.64	0/0:1.78	0/1:1.1	0/0:1.84	0/1:0.9	0/1:1.24	0/1:1.02	0/1:0.86	0/1:1.32	0/0:1.66	0/0:2.2	1/1:0.22	0/0:1.6	0/1:0.98	0/1:1.08	1/1:0.24	0/1:1.12	1/1:0.14	1/1:0.3	0/0:1.82	1/1:0.26	1/1:0.22
11	67003001	0.0065193	0.00442293	BMP10(dist=44725),LOC102185846(dist=5425)	intergenic	11:67003001-67006000	CN0	0.762897	0/1:1.16	0/0:2.12	0/1:0.94	0/0:1.82	0/1:1.16	0/0:2.02	1/1:0.04	0/0:2.54	0/1:1.22	0/0:1.5	0/1:1.08	0/0:2.0	0/0:2.18	0/0:1.6	1/1:0.02	0/0:2.46	1/1:0.0	0/1:1.24	0/1:1.06	0/1:1.16	0/1:0.96	0/1:1.18	0/1:1.04	0/0:2.06	0/1:0.96	0/0:1.42	0/0:1.96	0/1:0.9	0/0:2.44	0/1:1.1	0/1:0.96	1/1:0.0	0/0:2.04	0/1:1.06	0/1:0.94	0/0:1.92	0/1:0.98	0/0:2.3	0/0:2.0	1/1:0.0	0/0:2.18
11	68728501	0.0408996	0.0312843	GALNT14	downstream	11:68728501-68731000	CN0	0.793559	1/1:0.02	1/1:0.0	0/0:1.58	0/1:1.1	0/1:0.96	0/1:1.34	0/1:0.86	0/0:1.78	0/0:2.08	1/1:0.0	1/1:0.0	0/1:1.12	0/1:1.36	1/1:0.0	0/0:1.72	0/1:0.84	0/1:0.94	0/0:1.96	0/1:0.96	0/1:0.96	0/1:0.94	0/1:0.98	0/0:1.82	0/1:0.9	0/1:0.92	1/1:0.0	0/1:0.86	0/0:1.88	0/1:1.0	0/0:2.1	0/0:2.22	0/0:2.5	0/0:2.14	0/1:0.94	0/0:2.28	0/0:1.9	0/0:2.12	0/0:2.12	0/0:2.22	0/0:2.32	0/0:2.08
11	69539501	-0.00612399	0.000246059	YPEL5(dist=79233),ALK(dist=138649)	intergenic	11:69539501-69541500	CN2,CNH	0.667514	0/0:2.14	0/0:2.34	1/2:5.38	0/0:2.36	0/1:3.34	0/0:2.28	0/0:2.2	1/2:4.66	0/0:2.28	0/1:2.7	0/0:2.34	0/0:2.04	0/0:1.9	0/0:2.38	0/0:2.14	0/0:1.94	0/0:2.08	0/1:2.74	1/1:4.08	0/0:2.14	0/0:2.22	1/1:4.14	0/0:1.9	0/0:2.0	0/0:2.62	0/1:2.78	0/0:2.4	0/1:2.88	0/0:2.32	0/0:2.06	0/0:1.94	0/0:2.0	0/0:2.24	0/0:2.16	0/0:1.98	0/0:2.08	0/0:2.08	0/0:2.06	0/0:1.56	0/0:2.08	0/0:1.92
11	69590001	-0.00277546	-0.00338315	YPEL5(dist=129733),ALK(dist=85149)	intergenic	11:69590001-69595000	CN0,CN2	0.7762	1/1:0.34	0/1:1.18	1/1:0.1	0/1:1.16	0/1:1.3	1/1:0.12	1/1:0.34	1/1:0.22	0/0:2.32	1/1:0.2	0/1:1.34	1/1:0.2	0/1:1.22	1/1:0.18	0/1:1.34	0/0:2.24	1/1:0.24	1/1:0.16	1/1:0.28	0/2:2.5	0/1:1.22	0/1:1.38	0/1:1.2	0/1:1.36	0/1:1.28	1/1:0.28	0/1:1.02	0/1:1.34	0/0:1.92	0/1:1.18	0/1:1.14	0/1:1.34	0/0:2.34	0/0:2.08	0/1:0.94	0/1:1.02	0/1:1.06	0/2:2.52	0/1:1.2	0/0:2.08	0/1:1.44
11	70167501	-0.0107711	-0.00460939	ALK	intronic	11:70167501-70171000	CN0	0.782766	0/0:2.0	0/0:1.88	0/0:2.26	0/0:1.86	0/0:2.24	0/0:2.46	0/0:1.9	0/0:2.3	0/0:2.14	0/0:2.18	0/1:0.98	0/0:2.1	0/0:1.94	0/0:2.46	0/0:2.16	0/0:2.14	0/0:2.3	0/0:2.3	0/0:2.22	0/0:1.88	0/0:1.96	0/0:1.84	0/0:1.98	0/0:2.12	0/0:1.82	0/0:2.2	0/1:1.24	0/0:2.28	0/1:1.0	0/0:2.14	0/0:2.0	0/0:2.28	0/0:2.5	0/0:2.26	0/0:1.94	0/0:2.2	0/0:1.98	0/0:2.14	0/0:2.02	0/0:2.14	0/0:2.04
11	80491501	0.0360793	0.00594823	KCNS3(dist=19717),MSGN1(dist=26092)	intergenic	11:80491501-80494500	CN0	0.774691	0/0:1.98	0/0:2.02	0/0:2.2	0/0:1.7	0/0:2.16	1/1:0.06	0/0:1.9	0/0:1.84	0/1:1.08	0/0:1.8	0/0:1.96	0/1:0.9	0/0:1.76	0/0:1.94	0/0:2.1	0/1:1.0	0/0:1.66	0/1:1.3	0/0:1.8	0/0:1.98	0/0:1.94	0/0:1.94	0/0:2.12	0/0:1.78	0/0:1.54	0/0:1.6	0/0:2.06	0/0:1.98	0/0:1.92	0/0:1.78	0/1:0.92	0/1:0.98	0/1:1.34	0/1:1.08	1/1:0.04	0/1:0.8	0/0:2.04	0/1:1.06	0/0:1.92	0/0:2.0	0/0:1.86
11	84336501	-0.00872544	-0.00194536	TRNAC-ACA(dist=830667),LOC108637114(dist=445640)	intergenic	11:84336501-84342000	CN0	0.81912	0/0:1.94	0/1:1.18	0/1:1.2	0/0:1.98	0/0:1.98	0/0:2.1	0/0:2.36	0/0:2.16	0/1:1.06	0/0:2.42	0/0:1.68	0/0:2.2	0/0:2.28	0/1:1.22	0/0:2.1	0/0:2.02	0/0:2.22	0/1:0.9	0/0:1.92	0/0:2.32	0/0:2.08	0/0:1.9	0/0:2.0	0/0:1.98	0/0:2.04	0/0:2.34	0/0:2.3	0/0:2.14	0/0:1.98	0/0:1.86	0/0:2.06	0/0:1.98	0/0:1.96	0/0:2.06	0/0:2.26	0/0:1.96	0/0:2.18	0/0:2.24	0/0:1.76	0/0:2.02	0/0:2.16
11	89907501	0.0535584	0.0245865	CMPK2(dist=220294),SOX11(dist=632578)	intergenic	11:89907501-89912000	CN0	0.804946	0/1:0.96	0/0:2.06	0/0:2.22	0/1:1.08	0/0:2.22	0/1:1.44	0/0:2.14	0/0:1.98	0/0:2.24	0/1:0.88	0/0:2.16	0/0:1.98	0/1:1.04	0/0:1.86	0/0:1.78	0/0:2.22	0/0:2.22	0/0:2.14	0/0:2.24	0/1:1.08	0/1:1.16	0/1:1.02	0/1:1.0	0/1:1.36	0/0:2.3	0/0:2.04	0/0:2.22	0/0:1.82	0/1:1.04	0/0:2.02	0/0:2.2	0/0:1.84	0/0:2.12	0/0:1.92	0/0:2.24	0/0:2.28	0/0:1.98	0/0:2.1	0/0:2.2	0/0:1.94	0/0:1.98
11	93046501	0.0328741	0.00779342	LOC102171345	exonic	11:93046501-93069500	CN0	0.884931	0/1:0.96	0/0:1.9	1/1:0.0	0/0:2.1	0/1:1.04	0/0:1.86	0/0:2.02	0/0:2.24	0/0:2.02	0/1:1.14	0/1:1.12	0/1:1.02	0/0:2.04	0/0:2.34	0/1:1.1	0/0:2.08	0/1:1.1	0/1:1.0	0/0:2.08	0/1:1.12	0/0:1.9	0/1:0.96	0/1:1.08	0/0:2.02	0/1:1.02	0/0:2.18	0/1:0.86	0/0:2.06	0/1:1.04	0/0:1.98	0/0:1.96	1/1:0.0	0/0:2.0	0/0:2.06	0/0:1.84	0/0:1.94	0/0:1.86	0/0:2.06	1/1:0.0	0/0:1.96	0/0:2.04
11	93285001	-0.00222169	-0.000760277	LOC102175865,LOC102176137,LOC102176434,LOC102176702	exonic	11:93285001-93345500	CN0	0.866769	0/1:1.04	0/0:2.06	0/1:1.02	0/0:2.02	0/0:1.58	0/0:2.14	0/0:2.06	0/0:2.14	0/1:0.98	0/0:2.12	0/1:1.02	0/1:0.62	0/0:2.12	0/1:1.04	0/1:1.08	0/1:1.02	0/1:1.0	0/1:1.06	0/0:1.96	0/0:2.02	0/0:1.96	0/0:2.02	0/1:1.02	0/0:1.84	0/0:2.08	0/0:2.1	0/1:1.14	0/0:1.52	0/0:2.02	0/1:0.98	0/0:2.0	0/0:1.8	0/1:0.98	0/1:1.02	0/1:1.06	1/1:0.0	1/1:0.0	1/1:0.0	0/0:2.1	0/1:1.0	0/0:2.14
11	93391001	-0.00722399	-0.00383294	LOC102179209,LOC108637121	exonic	11:93391001-93407000	CN0	0.915884	0/0:2.08	0/1:1.14	0/1:1.08	1/1:0.0	0/0:2.1	0/0:1.86	0/1:1.08	0/1:1.0	0/0:2.06	1/1:0.0	0/1:1.04	0/1:1.0	0/1:1.04	0/1:1.46	0/1:0.98	0/1:1.02	0/1:0.86	0/1:0.86	0/0:2.1	1/1:0.0	1/1:0.0	0/1:0.94	0/1:1.06	0/1:0.94	0/1:0.98	0/0:2.16	0/1:1.06	0/0:2.06	1/1:0.0	0/0:1.98	0/0:1.96	0/0:1.94	0/0:1.96	1/1:0.0	0/1:1.04	0/1:1.1	0/1:1.04	0/0:1.98	0/0:2.0	0/0:2.06	0/1:1.02
11	93444001	0.0194551	0.00151431	LOC102183427,LOC102183700	exonic	11:93444001-93453500	CN0,CN2	0.804169	0/0:2.06	0/0:1.92	0/0:1.92	0/0:1.98	0/0:2.1	0/0:2.24	0/0:2.1	0/0:1.8	0/0:2.06	0/0:1.9	0/0:1.88	0/0:2.12	0/0:1.88	0/0:1.68	0/0:2.08	0/0:1.98	0/0:1.6	0/0:2.0	0/0:1.98	0/0:1.96	0/0:2.0	0/0:1.94	0/0:1.94	0/0:1.98	0/0:1.94	0/0:1.88	0/0:2.0	0/0:1.88	0/0:2.0	0/0:1.9	0/0:2.18	0/0:2.0	0/0:2.08	0/0:2.12	0/0:2.1	0/0:2.14	0/0:2.1	0/0:2.02	0/0:2.08	0/0:1.98	0/2:2.96
11	96102001	-0.00629597	-0.000815411	PBX3	intronic	11:96102001-96115500	CN2	0.657161	0/0:2.24	0/0:2.24	0/0:2.4	0/0:2.32	0/0:2.32	0/0:2.02	0/0:2.18	0/0:2.16	0/0:2.04	0/0:2.24	0/0:2.4	0/0:2.08	0/0:2.14	0/1:2.62	0/0:2.2	0/0:2.24	0/0:1.98	0/1:2.5	0/0:2.24	0/0:2.3	0/0:2.24	0/0:2.1	0/0:2.18	0/0:2.22	0/0:2.38	0/0:2.1	0/0:2.34	0/0:2.24	0/0:2.3	0/1:2.48	0/0:2.12	0/0:2.14	0/0:2.3	0/0:1.98	0/0:2.08	0/0:1.96	0/0:1.98	0/0:2.22	0/0:2.1	0/0:2.24	0/1:2.64
11	98012001	-0.00892631	-0.00312606	CDK9(dist=2984),FPGS(dist=1384)	intergenic	11:98012001-98015500	CN0	0.770067	0/0:1.92	0/0:2.18	0/0:2.2	0/0:1.92	0/0:2.44	0/1:1.12	0/0:2.22	0/0:2.44	0/1:1.04	0/1:1.18	0/0:2.1	0/0:2.24	0/0:2.36	0/0:2.44	0/0:2.36	0/0:2.18	1/1:0.08	0/0:2.36	0/0:2.28	0/0:2.06	0/0:1.92	0/1:1.22	0/0:2.08	0/0:2.12	0/0:2.3	0/1:1.42	0/0:1.64	0/0:2.16	0/0:2.46	0/0:2.8	0/1:0.82	0/0:2.46	0/0:2.22	0/0:1.98	0/0:2.44	0/0:2.22	0/0:2.08	0/0:2.26	0/0:2.3	0/1:1.12	0/0:2.08
11	99197501	-0.00563241	-0.00424007	IER5L(dist=96892),LOC102171346(dist=192758)	intergenic	11:99197501-99200000	CN0,CN2	0.679846	0/0:1.92	0/1:1.04	0/0:1.98	0/1:1.48	0/0:2.12	0/0:2.04	0/1:1.12	0/0:2.24	0/1:0.6	0/0:1.74	0/0:2.34	0/1:0.58	0/1:0.46	0/0:2.04	0/0:2.08	0/1:0.92	0/1:1.24	0/1:1.14	0/1:1.2	0/0:2.62	0/1:0.96	0/1:1.1	0/0:1.9	0/1:0.46	0/0:2.12	0/0:2.44	0/0:2.14	0/0:2.1	0/0:1.84	0/0:2.02	0/1:1.08	0/0:1.76	0/0:2.22	0/1:1.2	0/0:1.72	0/0:2.34	0/0:1.84	0/0:2.34	0/0:1.98	0/0:1.98	0/0:1.74
11	102907501	0.0761847	0.0189221	CAMSAP1(dist=7836),UBAC1(dist=9961)	intergenic	11:102907501-102911500	CN0	0.789375	0/0:1.86	0/0:2.0	0/0:2.32	0/0:1.76	0/0:1.92	0/0:2.22	0/0:1.94	0/0:1.94	0/0:1.92	0/0:1.96	0/0:1.78	0/0:1.96	0/0:1.98	0/0:1.58	0/0:1.72	0/0:2.16	0/0:1.7	0/0:1.98	0/0:1.94	0/0:1.82	0/0:1.82	0/0:1.78	0/0:1.84	0/0:1.96	0/0:1.96	0/0:1.62	0/0:2.02	0/0:1.78	0/0:2.14	0/0:2.34	0/0:2.0	0/0:2.16	0/0:2.2	0/0:1.92	0/0:2.22	0/0:2.04	0/0:2.14	0/0:2.4	0/0:1.74	0/0:2.16	0/0:1.88
12	1001	-0.000505635	-0.00241098	LOC102177789	exonic	12:1001-247000	CN0	0.889636	1/1:0.28	1/1:0.38	0/1:1.16	1/1:0.26	1/1:0.3	0/1:1.14	1/1:0.38	1/1:0.38	1/1:0.32	1/1:0.38	1/1:0.3	0/1:1.32	1/1:0.28	0/1:1.42	0/0:2.36	1/1:0.26	1/1:0.26	1/1:0.12	1/1:0.26	1/1:0.36	1/1:0.24	1/1:0.3	1/1:0.42	1/1:0.26	1/1:0.38	1/1:0.3	1/1:0.36	1/1:0.22	1/1:0.28	0/1:1.24	1/1:0.22	1/1:0.26	1/1:0.24	1/1:0.36	1/1:0.26	1/1:0.1	1/1:0.1	1/1:0.12	1/1:0.36	1/1:0.12	1/1:0.26
12	1898501	0.0949728	0.0353464	IRS2(dist=231174),MYO16(dist=84096)	intergenic	12:1898501-1901500	CN0	0.750158	0/0:1.98	0/0:2.18	0/0:2.08	1/1:0.04	0/0:2.18	0/1:1.24	0/0:1.86	0/0:1.76	0/0:2.12	0/0:1.92	0/0:2.3	0/0:2.12	0/0:1.92	0/0:2.1	1/1:0.0	0/0:2.02	0/0:2.02	0/0:2.24	0/1:0.88	0/1:1.12	0/1:1.28	0/1:1.16	0/1:1.14	0/1:1.14	0/1:1.18	0/1:1.08	0/0:1.86	0/0:1.96	0/1:1.26	0/0:2.04	0/0:1.84	0/0:1.82	0/0:1.8	0/0:1.72	0/0:2.32	0/0:1.64	0/0:2.0	0/0:2.12	0/0:2.2	0/0:1.96	0/0:2.24
12	13421501	0.0155684	0.0137391	LOC102187779	exonic	12:13421501-13427500	CN2,CNH	0.710006	0/0:1.9	0/0:2.04	0/0:2.2	0/0:1.9	0/0:2.2	0/1:2.58	0/0:2.06	0/0:2.16	0/0:1.94	0/0:1.74	0/0:2.02	0/1:2.7	0/0:2.1	0/1:2.86	0/0:2.22	0/1:3.02	0/0:2.02	0/0:1.84	0/0:1.88	1/1:3.58	0/0:2.0	0/0:2.06	0/0:1.98	0/0:2.08	0/0:1.86	0/0:1.88	0/0:2.0	0/0:2.12	0/1:2.52	0/1:2.58	0/0:2.06	0/1:2.76	0/1:2.8	0/0:2.1	0/0:2.14	0/0:2.08	0/0:2.2	0/0:1.86	0/1:2.66	0/0:2.02	0/0:2.46
12	13805001	-0.00614368	-0.00391723	LOC108637250	upstream	12:13805001-13807000	CN0	0.865743	0/1:0.94	1/1:0.0	0/1:0.66	1/1:0.0	0/1:1.02	1/1:0.0	1/1:0.04	1/1:0.0	0/1:1.1	1/1:0.0	0/1:0.82	1/1:0.0	1/1:0.0	0/1:1.04	1/1:0.0	1/1:0.02	0/1:1.26	0/1:1.04	1/1:0.0	1/1:0.1	0/1:0.82	0/1:1.16	1/1:0.02	1/1:0.0	1/1:0.0	1/1:0.0	1/1:0.0	1/1:0.04	0/0:1.84	0/1:1.02	1/1:0.24	1/1:0.0	0/0:1.76	0/0:2.18	1/1:0.0	1/1:0.0	1/1:0.0	1/1:0.0	0/0:2.36	1/1:0.0	1/1:0.0
12	14305501	0.0457626	0.0326672	LOC108637254,LOC108637255	exonic	12:14305501-14481000	CN0	0.757163	1/1:0.24	1/1:0.12	1/1:0.12	1/1:0.12	1/1:0.24	1/1:0.14	1/1:0.24	1/1:0.22	1/1:0.24	1/1:0.12	1/1:0.3	1/1:0.16	1/1:0.12	1/1:0.4	1/1:0.06	1/1:0.32	1/1:0.26	1/1:0.2	1/1:0.06	1/1:0.2	1/1:0.16	1/1:0.28	1/1:0.12	1/1:0.12	1/1:0.12	1/1:0.1	1/1:0.1	1/1:0.16	1/1:0.4	1/1:0.46	0/1:0.96	1/1:0.14	0/1:0.6	0/1:0.82	0/1:1.02	0/1:0.58	0/1:1.12	0/1:0.58	0/1:0.52	0/1:0.56	0/1:0.96
12	14563501	-0.00495837	0.0051301	LOC108637255(dist=62639),LOC102173859(dist=28726)	intergenic	12:14563501-14591500	CN0,CN2	0.690635	0/0:2.04	0/0:2.06	0/1:1.12	0/0:2.14	0/0:2.18	0/0:2.16	0/0:2.18	0/0:2.4	0/0:2.14	0/0:2.18	0/1:1.12	0/0:2.12	0/0:2.06	0/2:2.8	0/0:2.24	0/0:2.14	0/0:2.1	0/0:2.22	0/0:2.16	0/1:1.2	0/0:1.98	0/0:2.12	0/0:2.04	0/0:2.08	0/0:2.26	0/0:2.5	0/0:2.1	0/0:2.26	0/2:2.6	0/0:2.06	0/0:2.42	0/0:1.96	0/0:1.96	0/0:2.02	0/0:2.24	0/0:2.04	0/0:1.84	0/0:2.2	0/1:1.08	0/0:2.1	0/0:1.92
12	14599501	-0.00272247	0.0100453	LOC108637255(dist=98639),LOC102173859(dist=14726)	intergenic	12:14599501-14605500	CN0	0.776711	0/0:1.9	0/0:1.72	0/1:1.24	0/0:2.18	0/0:2.12	0/0:1.82	0/0:2.08	0/0:2.3	0/0:1.98	0/0:2.02	0/1:1.14	0/0:2.0	0/0:2.04	0/0:1.68	0/0:1.86	0/0:2.08	0/0:1.88	0/0:2.1	0/0:1.76	0/1:1.1	0/0:1.98	0/0:2.22	0/0:1.86	0/0:1.64	0/0:2.04	0/0:1.96	0/0:1.92	0/0:1.9	0/0:2.2	0/0:1.7	0/0:1.92	0/0:1.82	0/0:1.98	0/0:1.9	0/0:1.8	0/0:1.98	0/0:1.92	0/0:1.82	0/1:1.0	0/0:2.16	0/0:1.56
12	14607501	0.00508818	-0.00218004	LOC108637255(dist=106639),LOC102173859(dist=8726)	intergenic	12:14607501-14611500	CN0	0.791583	0/0:2.06	0/0:1.82	0/1:0.9	0/0:1.9	0/0:2.02	0/0:1.84	0/0:2.1	0/0:2.8	0/0:2.06	0/0:2.1	0/0:1.44	0/0:2.04	0/0:1.82	0/0:1.56	0/0:2.1	0/0:1.96	0/0:2.54	0/0:1.72	0/0:2.14	0/1:0.96	0/0:1.92	0/0:2.06	0/0:2.0	0/0:1.96	0/0:2.12	0/0:2.52	0/0:1.6	0/0:2.22	0/0:1.62	0/0:2.0	0/0:2.04	0/0:2.0	0/0:1.92	0/0:2.06	0/0:2.16	0/0:2.2	0/0:1.78	0/0:2.02	0/1:0.9	0/0:1.82	0/0:2.04
12	14682001	0.00631063	-0.00365516	LOC102185892	exonic	12:14682001-14728000	CN0,CN2,CNH	0.77216	0/1:1.36	0/2:3.08	2/2:4.5	0/1:1.44	0/1:1.3	0/1:1.36	0/1:1.34	0/1:1.42	0/0:2.34	1/1:0.38	0/2:3.4	0/1:1.3	0/1:1.38	0/0:2.46	1/1:0.56	0/1:1.36	0/1:1.14	0/1:1.42	0/1:1.2	0/2:3.16	0/1:1.26	0/1:1.4	0/1:1.14	1/1:0.56	0/1:1.38	0/0:2.3	0/0:2.14	0/1:1.36	0/0:2.14	0/1:1.2	0/0:1.68	0/0:2.16	0/0:2.54	1/1:0.7	0/0:2.18	0/0:2.06	0/0:2.78	0/1:1.28	0/1:1.12	0/0:2.8	0/0:2.36
12	14845501	0.0479815	0.0245108	LOC102185549	exonic	12:14845501-14919500	CN2	0.675461	0/0:2.16	0/0:2.22	0/0:2.3	0/0:2.12	0/0:2.28	0/1:2.96	0/0:2.44	0/0:2.5	0/0:2.4	0/0:2.24	0/0:2.5	0/1:3.02	0/0:2.2	0/1:3.16	0/0:2.24	0/0:2.06	0/0:2.32	0/0:2.16	0/0:2.2	0/1:2.6	0/0:2.06	0/0:2.24	0/0:2.26	0/0:2.12	0/0:2.14	0/0:2.18	0/0:2.24	0/0:2.16	0/0:2.12	0/1:3.02	0/1:2.94	0/0:2.0	0/0:2.14	0/0:2.1	0/0:2.14	0/1:2.58	0/0:2.16	0/0:2.36	0/1:2.84	0/0:2.22	0/0:2.14
12	15638001	0.0263762	0.0130737	LOC102180841	exonic	12:15638001-15648500	CN0	0.796909	0/0:1.9	0/1:1.12	0/0:2.36	0/0:2.0	0/0:1.94	0/1:1.18	0/0:2.0	0/0:1.98	0/1:1.0	0/0:1.92	0/0:2.0	0/1:1.08	0/0:1.96	0/1:1.28	0/0:2.26	0/0:1.9	0/1:1.12	0/0:2.14	0/0:1.84	0/0:1.96	0/0:1.78	0/0:1.92	0/0:1.96	0/0:1.86	0/0:1.84	0/0:2.08	0/0:1.8	0/0:1.96	0/0:1.84	0/1:1.08	0/0:2.06	0/0:1.84	0/1:1.16	0/0:2.02	0/1:1.26	0/1:0.96	0/1:1.12	1/1:0.26	0/1:1.16	1/1:0.28	0/1:0.96
12	15773001	-0.00445564	-0.00318831	LOC102179751	intronic	12:15773001-15776500	CN0	0.685811	0/0:1.94	0/0:1.56	0/0:1.72	0/1:0.74	0/0:1.82	0/0:2.1	0/0:1.9	0/0:1.84	0/0:2.04	0/1:1.26	0/1:0.88	0/0:1.86	0/0:1.82	0/0:2.36	0/0:1.74	0/0:1.64	0/0:2.06	0/0:2.06	0/1:0.98	0/1:0.9	0/1:0.7	0/0:1.82	0/0:1.56	0/1:0.76	0/0:1.96	0/1:0.94	0/0:1.56	0/1:1.5	0/0:2.1	0/1:1.04	0/1:0.92	0/0:1.76	0/0:1.68	0/0:1.76	0/1:1.32	0/0:1.76	0/0:1.76	0/0:1.7	1/1:0.02	0/0:1.64	0/0:2.02
12	16253001	0.0202798	-0.00167635	LOC102179751	intronic	12:16253001-16257500	CN0,CN2	0.769502	0/0:2.08	0/1:1.08	0/1:1.24	1/1:0.04	0/0:2.26	0/1:1.1	0/1:1.14	0/2:2.72	0/1:1.1	1/1:0.06	1/1:0.04	1/1:0.06	0/1:1.08	0/1:1.2	1/1:0.0	1/1:0.04	0/0:1.78	0/0:1.98	1/1:0.0	1/1:0.06	0/1:0.86	0/1:1.08	0/1:1.06	1/1:0.02	0/1:1.34	1/1:0.04	1/1:0.1	1/1:0.0	0/1:1.18	1/1:0.06	0/1:0.94	0/1:0.88	0/0:1.88	0/0:2.06	0/0:2.32	0/1:0.96	0/1:0.92	1/1:0.02	0/0:1.88	1/1:0.06	0/1:0.92
12	24838501	-0.00948821	-0.00497585	SLITRK5(dist=1063207),SLITRK6(dist=485431)	intergenic	12:24838501-24845500	CN0	0.892014	1/1:0.04	0/1:1.1	0/1:1.3	0/1:1.12	1/1:0.02	0/0:2.0	0/0:2.04	0/1:1.26	1/1:0.02	1/1:0.08	0/0:1.96	0/1:1.08	0/0:2.04	0/1:0.98	0/1:1.16	1/1:0.0	0/1:1.28	0/1:1.14	1/1:0.0	0/1:1.22	0/0:2.28	1/1:0.02	1/1:0.02	1/1:0.02	0/1:1.36	0/1:1.04	1/1:0.06	1/1:0.0	1/1:0.0	0/1:0.96	1/1:0.0	1/1:0.0	0/1:0.94	0/1:1.18	1/1:0.02	0/0:2.16	0/0:1.86	0/1:0.96	1/1:0.02	0/1:1.04	0/1:1.44
12	26342001	0.0121075	0.0159852	SLITRK6(dist=1004458),SLITRK1(dist=945325)	intergenic	12:26342001-26346500	CN0,CN2	0.730458	0/0:2.26	0/0:2.1	0/0:2.0	0/0:2.06	0/0:1.9	0/0:2.22	0/0:2.08	0/0:1.66	0/0:2.14	0/0:2.28	0/0:2.5	0/0:2.1	0/0:2.22	0/0:2.54	0/0:1.96	0/1:1.02	0/0:2.48	0/0:2.22	0/0:2.64	0/0:2.12	0/0:2.14	0/0:1.96	0/0:2.08	0/0:2.0	0/0:2.26	0/0:2.38	0/0:2.3	0/0:1.94	0/0:1.98	0/0:2.0	0/1:1.08	0/0:2.14	0/1:1.12	0/0:2.3	0/0:2.22	0/0:2.16	0/0:1.96	0/0:1.96	0/0:1.82	0/0:2.02	0/0:2.36
12	27600501	0.00154946	0.0191738	SLITRK1(dist=304469),TRNAC-GCA(dist=795773)	intergenic	12:27600501-27605000	CN0	0.735994	0/0:2.06	0/0:2.18	0/0:2.12	0/0:2.14	0/0:1.84	0/0:2.46	0/0:2.28	0/1:1.32	0/0:2.16	0/0:2.28	0/0:2.0	0/0:2.2	0/0:1.94	0/0:2.32	0/0:1.8	0/0:2.22	0/1:1.14	0/0:2.48	0/0:1.82	0/0:2.14	0/0:1.96	0/0:2.08	0/0:2.46	0/0:2.06	0/1:1.36	0/0:2.1	0/0:1.9	0/0:2.24	0/0:2.28	0/0:1.8	0/0:1.94	0/1:1.16	0/0:1.92	0/0:2.06	0/0:1.98	0/0:1.94	0/0:1.8	0/0:1.98	0/0:1.78	0/0:2.06	0/0:2.46
12	28690501	0.000174988	-0.00132292	TRNAC-GCA(dist=289657),NONE(dist=NONE)	intergenic	12:28690501-28694000	CN0,CN2	0.712659	0/1:1.0	0/0:1.94	0/0:1.92	0/1:1.3	0/1:0.82	0/1:1.08	0/1:1.04	0/1:1.0	0/1:1.06	0/1:1.14	0/1:1.28	0/1:1.12	0/1:1.12	0/0:2.12	0/0:1.94	0/1:0.94	0/1:1.18	0/0:2.22	0/0:2.24	1/1:0.12	0/1:1.16	0/1:1.1	0/0:2.02	0/0:1.92	0/1:1.22	0/0:1.86	0/1:0.7	0/1:1.08	1/1:0.08	0/1:0.94	0/0:1.82	0/1:1.1	0/0:1.82	0/0:2.32	0/0:2.22	0/0:2.2	0/0:1.88	0/0:1.82	0/0:2.14	0/0:1.7	0/1:1.26
12	29275501	-0.00657471	-0.00337904	TRNAC-GCA(dist=874657),SPRY2(dist=1443616)	intergenic	12:29275501-29282500	CN0,CN2	0.80029	0/0:2.22	0/0:2.0	0/0:2.22	0/0:2.36	0/1:0.94	0/1:1.16	0/0:2.08	0/1:1.2	0/0:1.94	0/0:2.02	0/0:2.34	0/0:2.12	0/0:2.14	0/0:1.94	0/0:2.12	0/0:1.96	0/0:2.02	0/0:2.44	0/0:1.98	0/1:1.14	0/0:2.18	0/0:1.84	0/0:2.26	0/0:2.04	0/0:2.36	0/0:1.98	0/1:1.14	0/1:0.94	0/0:1.98	0/0:1.92	0/0:2.16	0/0:2.1	0/0:2.1	0/0:2.08	0/0:2.2	0/0:1.98	0/0:2.02	0/0:2.2	0/0:2.26	0/0:2.1	0/0:2.52
12	34916501	-0.00818703	-0.00384451	KCTD12(dist=886739),LOC108637258(dist=61121)	intergenic	12:34916501-34919500	CN0	0.89092	0/1:1.06	0/1:1.22	0/1:1.2	1/1:0.0	1/1:0.04	1/1:0.0	1/1:0.04	1/1:0.0	0/1:1.22	0/1:1.24	1/1:0.04	1/1:0.02	0/1:0.78	0/1:1.08	1/1:0.02	1/1:0.04	0/1:0.68	0/1:1.22	1/1:0.04	0/1:1.32	0/1:1.0	1/1:0.02	0/0:1.86	1/1:0.04	1/1:0.0	0/1:1.08	0/1:0.92	0/0:1.76	0/1:1.06	0/1:0.84	1/1:0.04	1/1:0.0	1/1:0.02	0/1:1.0	0/1:1.12	1/1:0.0	0/1:1.08	1/1:0.02	1/1:0.0	0/1:1.24	1/1:0.06
12	38801001	0.0642031	0.0392628	PIBF1	intronic	12:38801001-38806000	CN2	0.730303	0/0:2.06	0/1:2.96	0/0:2.18	1/1:4.42	0/0:2.34	0/1:2.72	0/0:2.2	0/0:2.5	0/0:2.28	0/0:1.96	0/1:3.02	0/0:2.22	0/1:3.02	0/1:3.32	0/0:2.22	0/0:2.22	0/0:1.8	0/1:3.1	1/1:4.12	0/1:3.04	0/1:3.1	0/1:3.4	0/1:3.1	0/1:2.84	0/0:2.38	0/1:2.76	0/0:2.4	1/1:3.8	0/0:2.12	0/1:2.96	0/0:1.84	0/0:2.08	0/0:2.08	0/0:1.88	0/0:1.94	0/0:1.98	0/0:1.86	0/0:2.16	0/0:1.94	0/0:1.96	0/0:1.84
12	42179001	-0.00139664	0.0107873	KLHL1	intronic	12:42179001-42185000	CN0	0.658631	0/0:1.88	0/1:1.18	0/1:1.32	0/0:1.68	0/0:1.56	0/1:1.2	0/1:1.16	0/1:0.92	0/1:1.12	0/1:1.3	0/0:2.34	0/1:1.04	0/1:1.14	0/1:1.14	0/1:1.06	0/0:1.68	0/0:1.64	0/0:1.48	0/1:1.08	0/0:2.48	0/0:1.92	0/1:1.08	0/0:1.62	0/1:1.24	0/0:1.56	0/1:1.12	0/0:2.02	0/0:1.56	0/0:1.78	0/1:0.78	0/1:1.2	0/1:0.8	0/1:1.2	0/0:1.58	0/1:0.94	0/1:0.98	0/1:0.84	0/1:1.06	0/1:1.06	0/1:1.06	0/0:1.72
12	42197001	-0.0076418	-0.000871932	KLHL1	intronic	12:42197001-42204000	CN0	0.894363	0/1:1.08	1/1:0.06	0/1:1.18	0/1:0.96	0/1:1.04	1/1:0.16	1/1:0.08	1/1:0.02	1/1:0.04	1/1:0.04	0/0:2.04	1/1:0.06	1/1:0.08	1/1:0.12	1/1:0.06	0/1:1.1	0/1:1.04	0/1:1.06	1/1:0.04	0/0:2.08	0/0:2.46	1/1:0.14	0/1:1.08	1/1:0.3	0/1:0.96	1/1:0.12	0/1:0.92	0/1:1.26	0/1:1.12	1/1:0.06	1/1:0.02	1/1:0.06	1/1:0.12	0/1:0.9	1/1:0.06	1/1:0.1	1/1:0.06	1/1:0.08	1/1:0.06	1/1:0.04	0/1:1.08
12	42541001	-0.0105697	-0.000315288	KLHL1(dist=48703),NONE(dist=NONE)	intergenic	12:42541001-42544000	CN2,CNH	0.726921	0/0:1.76	0/0:2.02	0/0:1.52	0/0:2.14	0/0:1.9	0/0:1.46	0/0:2.24	0/0:1.84	0/0:2.12	0/0:2.02	0/1:2.72	0/0:2.0	0/0:2.08	0/0:2.36	0/0:2.08	0/0:2.12	0/0:2.0	0/1:3.06	0/0:2.06	0/0:1.74	0/0:1.96	0/0:1.98	0/0:2.0	0/0:1.8	0/0:2.0	0/0:1.96	0/1:2.66	0/0:1.9	0/0:1.96	0/0:1.82	0/0:1.94	0/0:1.8	0/0:1.9	0/0:1.96	0/0:2.18	0/0:1.88	0/0:1.78	0/0:2.18	0/0:2.0	0/0:2.02	0/1:2.86
12	43381501	-0.00966059	-0.00157426	KLHL1(dist=889203),NONE(dist=NONE)	intergenic	12:43381501-43387500	CN0	0.72613	0/0:2.06	0/0:1.86	0/0:1.68	0/0:1.96	0/0:1.94	0/0:2.06	0/0:2.12	0/0:1.96	0/0:1.86	0/1:1.34	0/0:1.78	0/0:2.14	0/0:1.88	0/0:2.34	0/0:2.2	0/1:0.96	0/0:1.7	0/0:1.76	0/0:1.86	0/0:1.92	0/0:2.16	0/0:2.14	0/0:2.12	0/0:1.88	0/0:1.8	0/0:1.76	0/1:1.38	0/0:1.58	0/0:2.3	0/0:1.68	0/0:1.78	0/0:1.8	0/0:1.98	0/0:1.82	0/0:1.8	0/0:1.92	0/0:1.84	0/0:1.6	0/1:1.0	0/0:1.84	0/0:1.82
12	45234001	0.0275415	0.0091112	NONE(dist=NONE),PCDH9(dist=822326)	intergenic	12:45234001-45244000	CN2,CNH	0.815476	0/0:2.0	0/0:1.92	0/0:2.08	0/0:2.0	0/0:1.88	0/0:2.0	0/0:2.14	0/1:2.9	0/0:2.06	0/0:1.96	0/0:2.04	0/0:2.08	0/0:1.94	0/0:1.72	0/0:2.14	0/0:2.02	0/0:2.36	0/0:2.04	0/0:2.16	0/0:2.14	0/0:2.12	0/0:2.1	0/0:2.1	0/0:2.08	0/0:1.8	0/0:2.04	0/0:1.78	0/0:1.88	0/0:2.06	0/0:1.86	0/0:1.94	0/0:1.8	0/0:2.06	0/0:1.96	0/0:2.06	0/0:1.78	0/0:1.78	0/0:1.94	0/0:1.96	0/0:2.0	0/0:2.6
12	48344501	0.0309236	0.0126824	TRNAW-CCA(dist=910354),TRNAS-GGA(dist=287045)	intergenic	12:48344501-48353500	CN2,CNH	0.660449	0/0:2.06	1/1:4.02	0/0:2.42	1/2:5.22	0/0:2.2	0/0:2.12	0/0:2.24	0/1:2.7	1/1:4.14	0/0:2.38	0/0:2.38	0/0:2.18	0/0:2.2	0/0:2.0	0/0:2.22	0/0:1.92	0/0:2.28	0/0:2.2	0/0:2.18	0/0:2.34	0/0:2.04	1/1:4.14	0/0:2.14	1/2:4.52	0/1:2.68	0/0:2.26	0/0:2.1	0/0:2.04	0/0:2.3	0/0:1.94	0/0:2.02	0/0:1.74	0/0:2.0	0/0:2.08	0/0:2.1	0/0:2.08	0/0:2.1	0/0:2.04	0/0:2.08	0/0:1.96	0/0:1.78
12	49389501	0.0150041	0.058309	TRNAS-GGA(dist=748885),ATP12A(dist=690029)	intergenic	12:49389501-49395000	CN0	0.749367	0/0:2.2	0/0:2.04	0/0:2.36	0/1:1.42	0/0:2.1	0/0:2.44	0/0:2.4	0/0:2.38	0/0:2.2	0/0:2.46	0/0:2.5	0/0:2.2	0/0:2.18	0/0:2.0	0/0:2.48	0/0:1.96	0/0:2.28	0/0:2.26	0/0:1.92	0/0:2.38	0/0:2.2	0/0:2.18	0/0:2.38	0/1:1.24	0/0:2.26	0/0:2.44	0/0:2.7	0/0:2.0	0/0:2.18	0/0:1.84	0/1:0.92	0/1:0.92	0/0:1.96	0/1:1.2	0/0:2.28	0/0:2.24	0/0:1.76	0/0:2.34	0/1:1.12	0/0:1.98	0/1:1.2
12	49904001	0.0168051	0.0165747	TRNAS-GGA(dist=1263385),ATP12A(dist=177029)	intergenic	12:49904001-49908000	CN0	0.811758	0/0:2.2	0/0:2.14	0/1:1.12	0/1:1.2	0/1:1.22	0/0:2.38	0/0:2.22	0/0:2.2	0/0:1.88	1/1:0.0	0/1:1.26	0/0:2.02	1/1:0.04	0/0:1.62	0/0:2.28	0/1:1.18	0/1:1.02	0/1:1.34	0/1:1.04	0/1:1.28	0/1:1.16	0/0:2.24	0/0:2.04	0/1:1.06	0/1:1.42	0/0:2.66	1/1:0.06	0/1:0.88	0/1:0.92	0/0:2.06	0/0:1.86	0/1:0.92	0/1:1.16	0/0:1.98	0/1:1.06	1/1:0.0	0/0:2.04	0/0:2.04	0/0:1.96	0/1:1.08	0/1:0.92
12	53373001	0.0314864	0.0261435	ATP8A2(dist=22831),SHISA2(dist=6145)	intergenic	12:53373001-53376500	CN0,CN2	0.71478	0/0:2.22	0/0:2.1	0/1:0.98	0/0:2.08	0/0:2.36	0/0:2.14	0/1:1.1	0/0:1.98	0/0:2.1	0/0:2.04	0/0:1.48	0/0:2.1	0/0:1.98	0/2:3.06	0/0:2.02	0/0:2.06	0/0:2.08	0/0:1.88	0/2:2.56	0/0:2.28	0/0:2.32	0/0:2.18	0/0:2.1	0/0:2.1	0/0:1.96	0/0:2.36	0/0:2.28	0/0:2.06	0/0:2.08	0/0:2.1	0/0:2.08	0/0:2.02	0/0:2.38	0/0:1.92	0/0:1.96	0/0:2.22	0/0:1.96	0/0:2.18	0/0:1.84	0/0:1.94	0/1:1.14
12	57291001	0.032617	0.00722057	B3GLCT(dist=219318),RXFP2(dist=139254)	intergenic	12:57291001-57306500	CN0	0.890684	0/1:1.1	0/0:2.08	0/0:2.24	0/0:2.02	0/1:1.1	0/0:2.06	0/0:2.14	0/0:2.44	0/0:2.14	0/1:1.06	0/1:1.24	0/1:1.04	0/0:2.18	1/1:0.0	0/0:2.08	0/0:2.02	0/0:2.0	0/1:1.12	0/0:2.08	0/0:2.08	0/1:1.02	0/1:1.1	0/0:2.02	0/0:2.08	0/0:2.0	0/1:1.08	0/0:2.16	0/1:1.12	0/0:2.2	0/0:1.9	0/0:2.02	0/0:1.74	0/0:2.02	0/0:2.02	0/0:2.08	0/0:1.94	0/0:1.9	0/0:2.06	0/0:2.22	0/0:1.92	0/0:2.04
12	57371501	-0.00802285	-0.00316403	B3GLCT(dist=299818),RXFP2(dist=62754)	intergenic	12:57371501-57383000	CN2	0.752543	0/0:2.18	0/0:2.22	0/1:2.68	0/0:2.08	0/0:2.36	0/0:2.04	0/0:2.32	0/1:2.5	0/1:3.84	0/0:2.22	0/0:2.34	0/0:2.26	0/0:2.16	0/0:1.74	0/1:2.48	0/0:2.08	0/0:2.26	0/0:2.16	0/0:2.02	0/0:2.3	0/0:2.04	0/0:2.16	0/0:2.2	0/0:2.04	0/0:2.36	0/0:2.24	0/0:2.28	0/0:2.16	0/0:1.94	0/0:2.22	0/0:2.08	0/0:1.94	0/0:2.1	0/0:1.86	0/0:2.24	0/0:2.0	0/0:1.88	0/0:2.2	0/0:2.1	0/0:2.0	0/0:2.06
12	60049001	0.0129152	0.0121442	LOC102178917	ncRNA_intronic	12:60049001-60052500	CN0,CN2	0.792476	0/1:1.48	0/0:2.48	0/2:2.94	1/1:0.34	0/1:1.28	0/1:1.36	0/1:1.52	1/1:0.2	1/1:0.1	0/1:1.08	1/1:0.14	0/2:2.94	0/0:2.64	0/0:1.78	1/1:0.42	0/2:2.72	0/1:1.4	0/2:3.12	1/1:0.18	0/0:2.0	0/1:1.48	1/1:0.24	0/1:1.36	0/1:1.54	1/1:0.12	0/2:2.8	0/1:1.32	0/0:2.0	0/1:1.04	0/1:1.46	1/1:0.1	0/1:1.3	0/1:1.58	1/1:0.12	0/1:1.22	1/1:0.12	0/1:1.1	0/2:2.82	1/1:0.08	0/0:2.32	0/1:1.38
12	66818001	-0.00402388	0.0102503	DLEU7(dist=501906),TRNAG-UCC(dist=134705)	intergenic	12:66818001-66820000	CN2	0.687987	0/0:2.24	0/0:2.1	0/0:2.18	0/1:2.82	0/0:2.46	0/0:2.38	0/0:2.26	0/0:1.98	0/0:2.04	0/0:1.84	0/0:1.96	0/0:1.98	0/0:2.22	0/1:2.94	0/1:2.66	0/0:2.2	0/0:2.18	0/0:1.64	0/0:2.16	0/0:2.2	0/0:2.08	0/0:2.28	0/0:2.42	0/0:2.26	0/1:2.56	0/0:1.78	0/0:2.32	0/0:2.12	0/0:2.28	0/0:2.36	0/0:2.4	0/0:1.82	0/0:2.1	0/0:1.66	0/0:2.02	0/0:1.92	0/0:2.14	0/0:2.06	0/0:2.04	0/0:2.36	0/0:2.32
12	79466001	0.0100459	-0.00296623	LOC108637264	intronic	12:79466001-79474000	CN0	0.840215	0/0:2.1	0/0:1.9	0/0:1.92	0/1:1.38	0/0:1.78	0/0:2.02	0/0:2.16	0/0:2.46	0/1:1.1	0/0:2.3	0/0:1.82	0/1:1.08	0/1:1.02	0/1:1.16	0/0:2.12	0/0:2.0	1/1:0.0	0/0:2.02	0/1:1.0	0/1:1.12	1/1:0.0	0/0:2.1	0/1:1.1	0/1:1.24	0/1:1.08	0/1:1.26	0/1:1.16	0/0:2.02	0/1:1.18	0/0:1.8	0/0:2.0	1/1:0.0	0/0:1.9	0/1:1.12	0/0:2.16	0/0:2.06	0/0:2.06	0/0:1.98	0/1:1.02	0/0:1.82	1/1:0.02
12	79475001	0.0100459	0.00259159	LOC108637264	intronic	12:79475001-79481000	CN0	0.796205	0/0:2.32	0/0:2.0	0/0:1.6	0/1:1.02	0/0:2.14	0/0:2.04	0/0:2.2	0/0:1.72	0/1:0.92	0/0:1.86	0/0:2.26	0/1:1.04	0/1:1.14	0/1:0.9	0/0:2.16	0/0:1.88	1/1:0.04	0/0:1.82	0/1:1.36	0/1:0.92	1/1:0.0	0/0:2.2	0/1:1.1	0/1:1.1	0/1:1.08	0/1:0.98	0/1:1.44	0/0:2.22	0/1:1.24	0/0:1.7	0/0:2.14	1/1:0.0	0/0:2.44	0/1:1.1	0/0:2.06	0/0:1.84	0/0:1.92	0/0:2.16	0/1:1.04	0/0:2.0	1/1:0.04
12	82199001	0.024308	0.00589462	PCDH17(dist=818253),DIAPH3(dist=1592157)	intergenic	12:82199001-82206500	CN0	0.675434	0/0:1.94	0/0:2.0	0/0:2.08	0/0:2.12	0/0:1.88	0/0:1.92	0/0:1.72	0/0:2.3	0/0:1.84	0/0:2.26	0/0:2.12	0/0:2.0	0/0:2.08	0/0:2.1	0/0:2.22	0/0:1.92	0/0:2.28	0/0:1.56	0/0:2.26	0/0:2.14	0/0:2.36	0/0:2.38	0/0:2.16	0/0:2.0	0/0:2.1	0/0:2.32	0/0:1.94	0/0:1.6	0/0:1.92	0/1:1.2	0/0:2.34	0/0:2.12	0/0:2.12	1/1:0.3	1/1:0.3	0/0:2.06	0/1:1.34	0/1:1.32	0/0:2.18	0/0:2.02	0/1:1.16
12	84027501	-0.00497837	-0.000300754	DIAPH3	intronic	12:84027501-84033500	CN0	0.844751	0/1:1.04	1/1:0.0	0/0:2.02	0/0:1.84	0/1:0.92	0/1:1.2	0/0:1.96	0/0:2.38	0/0:2.04	0/1:0.86	0/0:2.08	0/1:0.98	0/0:2.14	0/0:2.08	0/0:1.8	0/1:1.06	0/0:2.0	0/0:1.86	0/0:2.18	0/0:2.08	0/0:2.06	0/0:2.06	0/0:1.88	0/1:0.98	0/0:1.86	0/0:2.02	0/0:1.86	0/0:1.84	0/0:1.96	0/0:1.96	0/0:2.02	0/0:2.18	0/0:2.18	0/0:2.08	0/1:1.12	0/1:1.14	0/1:1.06	0/0:1.96	0/0:2.04	0/0:1.98	0/0:2.18
12	85470501	0.103609	0.0580477	TDRD3(dist=484227),LOC102171501(dist=398993)	intergenic	12:85470501-85473500	CN0	0.686297	0/1:0.94	1/1:0.3	0/1:1.3	0/1:0.92	0/1:0.52	1/1:0.1	0/1:0.52	1/1:0.46	1/1:0.36	0/1:1.0	0/1:0.96	0/1:1.1	1/1:0.42	0/0:2.04	0/1:0.6	1/1:0.28	1/1:0.24	0/1:0.62	1/1:0.28	0/1:0.92	0/1:0.82	0/1:1.02	1/1:0.42	1/1:0.38	0/1:1.1	0/1:0.78	1/1:0.24	0/1:0.58	1/1:0.28	1/1:0.22	1/1:0.46	1/1:0.22	1/1:0.4	1/1:0.32	1/1:0.32	1/1:0.22	1/1:0.22	1/1:0.32	1/1:0.42	1/1:0.42	1/1:0.4
12	86053501	0.0104518	0.0121053	LOC102171501(dist=152855),PCDH20(dist=554352)	intergenic	12:86053501-86056500	CN0	0.781476	1/1:0.24	1/1:0.26	1/1:0.42	1/1:0.26	1/1:0.2	1/1:0.14	1/1:0.34	1/1:0.1	1/1:0.18	1/1:0.08	1/1:0.1	1/1:0.2	1/1:0.24	1/1:0.32	1/1:0.28	1/1:0.2	1/1:0.14	1/1:0.12	1/1:0.14	1/1:0.16	1/1:0.16	1/1:0.32	1/1:0.2	0/1:0.64	1/1:0.1	1/1:0.16	1/1:0.0	1/1:0.0	1/1:0.14	1/1:0.26	0/1:0.78	1/1:0.18	1/1:0.26	0/1:0.86	1/1:0.24	0/1:0.78	1/1:0.24	1/1:0.22	1/1:0.3	1/1:0.38	0/0:1.86
12	87141001	0.169848	0.0802235	PCDH20(dist=526018),NONE(dist=NONE)	intergenic	12:87141001-87145500	CN0,CN2	0.731928	0/0:2.12	0/0:2.08	0/0:2.14	0/1:1.34	0/1:1.2	0/1:1.18	0/0:2.32	1/1:0.08	0/0:2.02	0/1:1.12	0/1:1.36	0/0:2.14	0/0:2.04	0/0:2.4	0/1:1.3	0/0:2.06	1/1:0.12	1/1:0.1	1/1:0.04	0/0:2.16	0/1:1.28	1/1:0.16	0/1:1.1	0/1:1.3	0/1:1.3	1/1:0.18	0/1:1.06	0/1:1.14	0/1:1.06	0/0:1.94	0/0:1.84	0/0:1.68	0/1:1.14	0/0:2.14	0/0:2.16	0/1:0.84	0/0:1.8	0/1:1.1	0/0:2.4	0/0:2.12	0/2:2.94
13	2894001	0.0162486	0.0017085	PAK5(dist=529882),ANKEF1(dist=157472)	intergenic	13:2894001-2902500	CN0,CN2	0.654859	0/0:2.02	0/0:1.96	0/0:1.98	0/0:2.0	0/0:2.04	0/0:2.24	0/0:2.22	0/0:2.14	0/0:2.14	0/0:2.34	0/0:2.14	0/0:2.04	0/0:2.12	0/0:1.86	0/0:2.26	0/0:2.24	0/0:2.02	0/0:2.18	0/0:1.92	0/0:2.02	0/0:2.1	0/0:2.34	0/0:2.26	0/0:1.98	0/0:1.82	0/0:1.98	0/0:2.0	0/0:1.84	0/0:2.12	0/0:2.04	0/0:2.16	0/2:3.2	0/2:2.4	0/2:3.0	0/2:3.08	0/2:3.02	2/2:4.0	0/2:3.22	0/0:2.22	0/0:2.02	0/0:2.12
13	5428501	0.0120814	0.00854578	LOC108637379(dist=68467),SPTLC3(dist=965270)	intergenic	13:5428501-5432000	CN0	0.774565	0/0:2.0	0/0:2.1	0/0:2.14	0/0:2.08	0/0:2.1	0/0:2.08	0/0:2.26	0/0:2.4	0/1:1.14	0/0:2.12	0/0:2.04	0/0:2.14	0/0:2.02	0/1:0.58	0/0:2.22	0/1:0.8	0/0:2.4	0/0:2.36	0/0:1.98	0/0:2.34	0/0:2.16	0/0:2.08	0/0:1.96	0/0:1.72	0/0:2.52	0/0:2.14	0/0:2.22	0/1:1.32	0/0:2.12	0/0:2.02	0/0:2.48	0/0:1.96	0/0:2.34	0/1:1.04	0/1:0.96	0/0:2.32	0/0:1.98	0/1:1.2	0/0:2.02	0/1:1.22	0/0:1.94
13	6180001	-0.00704951	-0.00269757	LOC108637379(dist=819967),SPTLC3(dist=213270)	intergenic	13:6180001-6184000	CN0	0.918544	1/1:0.04	0/1:1.18	1/1:0.0	1/1:0.0	0/1:0.88	0/1:1.54	0/1:1.22	0/1:0.74	0/1:1.1	1/1:0.0	1/1:0.0	0/1:0.98	1/1:0.0	1/1:0.0	1/1:0.02	1/1:0.02	1/1:0.0	0/1:0.94	1/1:0.0	1/1:0.0	1/1:0.02	1/1:0.0	1/1:0.02	1/1:0.02	1/1:0.08	0/1:1.16	1/1:0.0	0/1:1.32	1/1:0.0	1/1:0.0	1/1:0.02	1/1:0.0	1/1:0.0	1/1:0.0	1/1:0.0	1/1:0.0	1/1:0.0	1/1:0.0	0/1:1.3	1/1:0.0	1/1:0.0
13	7365001	0.0191454	0.00179028	MACROD2	intronic	13:7365001-7378000	CN0	0.879776	0/0:1.98	0/0:2.08	0/1:0.94	0/0:2.06	0/0:2.2	0/0:2.12	1/1:0.0	0/0:2.18	0/0:2.16	0/0:2.12	0/0:2.04	0/0:2.12	0/0:2.12	0/0:1.98	1/1:0.02	0/0:2.08	0/0:2.02	0/0:2.08	0/1:1.1	0/1:1.12	0/1:1.12	0/0:1.88	0/0:1.98	0/0:2.16	0/0:1.92	0/0:2.0	0/1:1.02	0/0:1.88	0/1:1.02	0/0:2.18	0/0:2.02	0/0:2.22	0/0:2.18	0/0:2.08	0/0:2.12	0/0:2.08	0/0:2.12	0/0:2.06	0/0:1.94	0/0:1.9	0/1:1.14
13	7458001	0.0199433	-0.00459909	MACROD2	intronic	13:7458001-7463500	CN0,CN2	0.665431	0/0:2.14	0/0:2.34	0/1:1.1	0/0:2.06	0/0:2.26	0/0:2.36	0/1:1.22	0/0:2.28	0/0:2.02	0/0:2.2	0/0:2.24	0/0:2.2	0/0:2.18	0/0:2.24	0/0:2.3	0/0:2.26	0/0:2.24	0/0:1.72	0/1:1.28	0/1:1.46	0/0:2.1	0/0:2.14	0/0:2.14	0/0:2.24	0/0:2.28	0/0:2.2	0/1:1.28	0/0:1.8	0/1:1.36	0/0:2.1	0/0:1.94	0/0:1.76	0/0:2.08	0/0:2.2	0/0:2.3	0/0:1.76	0/1:0.94	0/0:2.36	0/0:2.02	0/0:1.94	0/0:1.98
13	9410001	-0.00417124	-0.00308953	MACROD2	intronic	13:9410001-9416500	CN0	0.76735	0/0:1.84	0/1:1.04	0/0:1.88	0/0:1.76	0/1:1.08	0/0:2.22	0/1:0.96	1/1:0.16	1/1:0.2	0/1:1.22	1/1:0.16	0/0:1.84	0/0:1.92	0/1:1.32	1/1:0.28	0/0:1.98	0/0:1.52	0/1:0.96	0/0:2.34	0/1:1.16	0/0:1.94	0/1:1.12	0/1:1.04	0/1:1.02	0/0:1.98	0/0:1.84	0/0:2.02	0/1:1.0	0/0:1.94	0/0:1.7	0/0:1.8	0/0:2.0	0/1:1.14	0/0:1.94	0/0:1.8	1/1:0.06	0/1:1.12	1/1:0.2	0/1:0.98	0/1:1.1	1/1:0.3
13	12583501	0.265924	0.112061	TRNAE-UUC(dist=109163),TRNAS-GGA(dist=1317812)	intergenic	13:12583501-12587500	CN0	0.810187	0/1:1.06	0/0:2.04	0/0:1.72	0/1:1.1	0/0:1.98	0/0:2.24	0/1:0.98	0/0:1.92	0/0:2.06	0/1:1.18	0/1:0.96	1/1:0.0	0/0:1.96	0/1:0.92	0/1:1.02	0/0:2.24	0/1:0.94	0/0:1.68	0/0:2.46	1/1:0.0	0/1:0.98	0/0:1.84	0/1:1.04	1/1:0.28	0/0:2.4	0/0:2.04	0/1:0.92	0/1:0.96	0/1:1.16	0/0:2.06	0/0:2.22	0/0:1.68	0/0:2.16	0/0:2.22	0/0:1.94	0/0:1.98	0/0:2.0	0/0:2.22	0/0:2.08	0/0:2.2	0/0:2.12
13	20946501	-0.00748539	-0.00560955	PLXDC2	intronic	13:20946501-20950500	CN0	0.813896	0/0:1.92	0/0:1.94	0/0:2.14	0/0:1.78	0/0:2.02	0/1:1.44	0/0:1.98	0/0:2.18	0/0:1.98	0/0:2.06	0/0:2.08	0/0:1.7	1/1:0.0	0/0:2.02	0/0:1.92	0/0:2.24	0/0:1.98	0/1:0.78	0/0:1.96	0/0:2.24	0/0:2.18	0/0:2.04	0/0:2.1	0/1:1.12	0/0:2.44	0/0:2.36	0/0:2.22	0/0:2.66	0/1:0.94	0/0:2.22	0/0:1.96	0/0:2.08	0/0:1.9	0/1:0.92	0/0:1.78	0/0:2.1	0/0:1.8	0/0:2.16	0/0:1.9	0/0:2.04	0/0:2.38
13	22722501	-0.00955386	-0.00423057	DNAJC1(dist=164724),TRNAN-GUU(dist=27843)	intergenic	13:22722501-22727000	CN0,CN2	0.862254	0/1:1.18	0/1:1.26	0/1:1.4	1/1:0.04	0/1:0.96	0/0:1.98	1/1:0.08	0/1:1.0	1/1:0.04	0/1:1.04	1/1:0.04	0/0:2.14	1/1:0.06	0/0:2.34	0/0:2.24	0/1:1.12	0/1:1.26	0/0:2.08	0/1:1.08	0/1:1.18	0/1:1.06	0/1:1.24	0/0:2.32	1/1:0.2	0/0:2.54	1/1:0.06	0/0:2.44	1/1:0.06	1/1:0.08	0/0:2.32	0/0:2.06	0/1:1.02	1/1:0.04	0/1:1.04	1/1:0.02	0/1:1.16	0/0:2.04	0/0:2.28	0/1:1.14	1/1:0.02	0/1:1.14
13	35757001	-0.000179116	-0.00493338	MPP7	intronic	13:35757001-35759500	CN2	0.669303	0/0:2.32	0/0:1.96	0/0:2.44	0/0:1.96	0/0:2.42	0/0:1.74	0/0:2.0	0/0:2.5	0/0:2.26	0/0:1.88	0/1:3.04	0/0:2.02	0/0:2.08	0/1:3.44	0/0:2.0	0/0:1.98	0/0:1.76	0/0:2.06	0/0:2.16	0/0:2.4	0/0:2.46	0/0:2.4	0/0:2.0	0/0:2.02	0/0:1.94	0/0:2.12	0/0:2.5	0/0:2.5	0/0:2.14	0/0:2.18	0/0:2.08	0/0:2.42	0/0:1.86	0/0:2.02	0/0:2.06	0/0:2.06	0/0:2.46	0/1:2.8	0/0:2.3	0/0:2.16	0/0:1.72
13	37860501	-0.000990901	-0.00140333	ZNF133	exonic	13:37860501-37874000	CN2	0.669449	0/1:2.8	0/1:3.04	0/1:2.96	0/1:2.88	0/1:2.84	0/1:2.72	0/1:2.56	0/1:3.14	0/1:2.66	0/1:2.78	0/1:3.36	0/1:2.44	0/1:2.98	0/1:3.12	0/1:3.02	0/1:2.54	0/1:2.72	0/1:2.98	0/1:2.66	1/1:3.6	0/1:2.9	0/1:2.94	0/1:2.8	0/1:2.72	0/1:3.12	0/1:3.0	0/1:2.82	0/1:3.14	0/1:2.76	0/1:2.82	0/1:3.02	0/1:2.84	0/1:2.76	0/1:3.38	0/1:3.08	0/1:2.68	0/1:2.86	0/1:3.06	0/1:2.7	0/1:2.7	1/1:3.48
13	39820001	0.0179881	0.00327326	LOC102181791(dist=205428),KIZ(dist=12366)	intergenic	13:39820001-39829000	CN2	0.759112	0/0:2.28	0/1:3.1	0/0:2.02	0/0:2.3	0/0:2.14	0/0:2.04	0/0:2.1	0/1:2.66	0/1:3.08	0/0:2.22	0/0:2.28	0/0:2.0	0/0:2.26	0/0:2.42	0/0:2.38	0/0:2.14	0/0:2.42	0/0:1.94	0/0:2.3	0/0:2.48	0/0:1.98	0/0:2.36	0/0:2.16	0/0:1.98	0/0:2.14	0/1:2.64	0/0:2.08	0/0:1.92	0/0:2.1	0/0:2.26	0/0:1.94	0/0:1.96	0/0:2.2	0/0:1.96	0/0:2.2	0/0:1.84	0/0:1.86	0/0:2.18	0/0:2.06	0/0:1.94	0/0:2.18
13	41723001	0.057026	0.0263827	LOC102184534(dist=180976),SYNDIG1(dist=42426)	intergenic	13:41723001-41726000	CN0,CN2	0.671715	0/0:2.02	0/0:2.08	0/0:1.54	0/0:1.96	0/0:2.22	0/0:1.52	0/0:2.02	0/1:0.94	0/0:2.18	0/0:1.92	0/0:1.74	0/0:1.8	0/0:1.76	0/2:2.88	0/0:2.16	0/0:2.02	0/0:1.9	0/0:2.24	0/0:2.0	0/0:2.2	0/0:1.68	0/0:1.82	0/0:1.9	0/0:2.1	0/0:2.14	0/0:2.02	0/0:2.02	0/0:2.26	0/0:1.8	0/1:1.3	0/1:0.92	0/0:1.84	0/1:0.96	0/1:1.26	0/0:1.96	0/0:2.24	0/0:1.98	0/0:2.22	0/0:2.08	0/0:1.9	0/0:2.06
13	43366001	0.0101937	-0.00354108	LOC102188953(dist=55525),LOC106502758(dist=11693)	intergenic	13:43366001-43369000	CN0,CN2	0.71407	0/0:2.14	1/1:0.1	0/1:1.22	0/1:0.72	0/1:1.36	0/0:1.74	0/1:1.34	1/1:0.38	0/0:2.42	0/1:1.38	0/1:1.12	0/0:2.28	0/0:2.28	0/1:1.42	0/1:1.32	0/0:2.12	1/1:0.14	0/1:1.18	0/0:1.7	0/2:2.94	0/1:1.36	0/1:1.2	0/1:1.14	1/1:0.4	0/1:1.32	1/1:0.42	1/1:0.14	0/1:1.52	0/1:1.14	0/1:1.42	0/1:1.02	0/0:1.84	1/1:0.02	0/1:1.2	0/1:0.76	1/1:0.02	0/0:1.88	0/1:1.6	0/1:1.02	0/1:1.26	0/1:1.02
13	49636001	0.00471509	0.0156194	LOC108637368(dist=372748),HAO1(dist=375101)	intergenic	13:49636001-49649500	CN0,CN2	0.728912	0/0:2.1	0/0:1.98	0/1:1.3	0/0:1.98	0/1:1.52	0/0:2.14	0/1:1.48	0/0:2.28	0/0:2.12	0/0:1.94	0/0:2.12	0/0:2.04	0/0:2.02	0/0:1.78	0/0:2.28	0/0:1.86	0/0:2.18	0/0:2.12	0/0:2.24	0/1:1.38	0/0:2.1	0/0:2.3	0/0:2.12	0/0:2.06	0/0:2.06	0/1:1.34	0/0:1.94	0/0:1.96	0/0:2.14	0/0:1.92	0/0:1.94	0/0:1.98	0/0:2.02	0/0:2.18	0/0:2.04	0/0:1.92	0/0:2.02	0/0:2.1	0/0:1.98	0/1:1.22	0/2:2.7
13	50133001	-0.000353923	0.00205956	HAO1(dist=46780),ADRA1D(dist=126097)	intergenic	13:50133001-50138500	CN0	0.748155	0/1:1.38	0/1:1.14	0/1:1.02	0/1:1.04	0/1:1.3	0/1:1.06	0/1:1.16	0/1:1.32	0/1:1.2	0/1:1.16	0/1:1.2	0/1:1.18	0/1:1.26	0/0:2.02	0/1:1.54	0/1:1.12	0/1:1.0	0/1:1.06	0/1:1.28	0/1:1.28	0/1:1.0	0/1:1.36	0/1:1.36	0/1:1.28	0/1:1.2	0/1:1.16	0/1:1.42	0/1:1.04	0/1:1.22	0/1:1.0	0/1:1.18	0/1:0.86	0/1:1.42	0/1:1.36	0/1:1.3	0/1:1.02	0/1:1.2	0/1:1.18	0/1:1.14	0/1:1.22	0/1:1.02
13	63128501	0.246709	0.205162	AHCY,ASIP	exonic	13:63128501-63382000	CN2,CNH	0.743499	0/0:2.1	0/0:2.06	1/2:5.44	1/2:5.48	1/1:4.14	1/2:5.26	1/1:3.66	1/1:3.62	0/0:2.06	1/2:5.32	1/2:5.5	1/2:5.54	1/2:5.64	1/2:5.22	1/2:5.8	1/1:3.7	1/2:5.5	1/1:3.74	1/2:5.4	1/2:5.42	1/2:5.54	1/2:5.64	1/2:4.66	1/2:5.36	1/2:5.48	1/2:5.32	1/1:3.7	1/1:3.64	1/2:5.42	0/0:2.18	0/0:2.0	0/0:1.94	0/0:2.22	0/0:2.02	0/0:2.02	0/0:2.0	0/0:1.98	0/0:2.02	0/0:2.06	0/0:2.04	0/0:2.02
13	73671001	0.0337427	0.0151826	LOC102188237(dist=45812),LOC102188515(dist=34535)	intergenic	13:73671001-73675000	CN0	0.863426	1/1:0.18	1/1:0.06	0/1:1.44	0/1:1.1	1/1:0.02	1/1:0.08	0/0:1.98	0/1:0.98	0/1:1.02	1/1:0.08	1/1:0.08	0/0:1.92	1/1:0.04	1/1:0.0	1/1:0.2	0/1:1.12	1/1:0.0	1/1:0.18	1/1:0.26	1/1:0.08	1/1:0.1	1/1:0.16	0/1:0.92	1/1:0.18	1/1:0.06	0/1:1.0	1/1:0.08	1/1:0.14	1/1:0.24	0/1:0.94	1/1:0.0	0/1:1.18	1/1:0.0	1/1:0.04	1/1:0.04	1/1:0.06	1/1:0.08	0/1:1.44	0/0:2.36	0/1:0.94	1/1:0.02
13	73676501	0.0304937	0.0180746	LOC102188237(dist=51312),LOC102188515(dist=30535)	intergenic	13:73676501-73679000	CN0	0.809375	1/1:0.12	1/1:0.04	0/1:0.98	0/1:1.22	1/1:0.06	1/1:0.08	0/0:1.82	0/1:1.26	0/1:1.2	1/1:0.04	1/1:0.0	0/0:2.18	1/1:0.08	1/1:0.0	1/1:0.08	0/1:1.28	1/1:0.0	1/1:0.04	1/1:0.0	1/1:0.04	1/1:0.06	1/1:0.04	0/1:0.98	1/1:0.16	1/1:0.04	0/0:1.4	1/1:0.26	1/1:0.0	1/1:0.02	0/1:1.3	1/1:0.06	0/1:1.14	1/1:0.06	1/1:0.14	1/1:0.1	1/1:0.16	1/1:0.1	0/1:0.98	0/0:2.06	0/1:1.12	1/1:0.12
13	80649501	-0.0110227	-0.00407257	TSHZ2(dist=44788),ZNF217(dist=5512)	intergenic	13:80649501-80653500	CN0	0.806439	0/0:2.18	0/0:2.12	0/1:1.06	0/1:0.82	0/1:1.24	0/0:2.02	0/0:1.88	0/1:1.0	0/0:1.88	0/0:1.9	1/1:0.0	0/0:1.9	0/0:2.06	0/0:2.34	0/0:2.22	0/0:1.9	0/0:2.3	0/1:0.84	0/0:2.0	0/0:2.12	0/1:0.94	0/0:1.92	0/0:1.88	0/0:1.86	0/0:1.62	0/0:1.78	0/1:1.02	0/0:1.9	0/0:2.0	0/0:1.9	0/0:1.68	0/0:1.6	0/0:1.92	0/0:1.94	0/0:1.94	0/0:1.9	0/0:1.84	0/0:2.12	0/0:2.06	0/0:2.0	0/0:2.14
13	81450501	0.0201148	0.0121242	PFDN4(dist=243609),DOK5(dist=9387)	intergenic	13:81450501-81454500	CN2,CNH	0.731102	0/0:2.02	0/0:1.98	0/0:2.02	0/0:2.08	0/0:2.3	0/0:2.04	0/0:2.38	0/0:1.82	0/0:2.14	0/0:2.02	0/0:1.9	0/0:1.98	0/0:2.06	0/1:2.54	0/1:2.54	0/0:1.96	0/0:1.96	0/0:1.9	0/1:2.5	0/0:2.04	0/0:1.98	0/0:2.1	0/0:2.08	0/0:2.02	0/0:1.88	0/0:1.68	0/0:2.1	0/0:1.84	0/0:2.24	0/0:1.94	0/0:1.94	0/0:1.68	0/0:2.14	0/0:1.86	0/0:2.24	0/0:1.96	0/0:1.92	0/0:2.02	0/0:2.28	0/0:2.14	0/0:1.92
13	81476001	0.011681	4.52245e-05	DOK5	intronic	13:81476001-81482000	CN0	0.796307	0/0:1.78	0/1:1.06	0/0:1.64	0/0:1.58	0/0:1.76	0/0:1.82	0/0:2.1	0/0:1.9	0/0:1.94	0/0:1.72	0/0:2.28	0/0:2.02	0/0:2.0	0/0:1.78	0/0:1.92	0/0:2.14	0/0:1.78	0/0:1.88	0/0:2.04	0/0:1.86	0/0:1.76	0/0:1.88	0/0:1.88	0/0:1.96	0/0:1.7	0/0:2.14	0/0:2.1	0/0:1.86	0/0:1.72	0/1:1.14	0/0:1.58	0/0:1.98	0/0:1.96	0/0:2.0	0/0:1.8	0/0:1.94	0/0:1.78	0/0:2.22	0/0:1.98	0/0:2.06	0/0:1.92
14	877001	0.0147757	0.0427808	DEPTOR	exonic	14:877001-884000	CN2	0.653131	0/0:2.18	0/0:2.08	0/0:2.04	0/0:1.88	0/0:2.3	0/0:2.4	0/0:2.04	0/0:2.42	0/0:2.28	0/0:2.0	0/0:2.02	0/0:2.16	0/0:2.14	0/0:2.48	0/0:1.96	0/0:2.3	0/0:2.06	0/0:2.1	0/0:2.22	0/0:2.12	0/0:2.24	0/0:2.12	0/0:2.1	0/0:2.26	0/0:2.18	0/0:2.0	0/0:2.0	0/0:2.02	0/0:2.02	0/0:2.54	0/0:2.1	0/1:2.82	0/0:2.46	0/1:3.08	0/0:2.26	0/0:2.32	0/0:2.48	0/1:2.74	0/0:2.48	0/0:2.4	0/0:2.3
14	2567001	0.0563842	0.057944	LOC106502869(dist=859399),RALYL(dist=1108914)	intergenic	14:2567001-2571500	CN0,CN2	0.885455	0/1:1.48	1/1:0.26	1/1:0.12	0/1:1.52	1/1:0.36	0/1:1.38	1/1:0.36	1/1:0.26	1/1:0.2	1/1:0.3	0/2:3.34	1/1:0.2	0/0:2.26	0/1:1.48	0/1:1.44	0/1:1.3	1/1:0.46	1/1:0.24	1/1:0.3	0/1:1.48	0/1:1.46	0/1:1.3	0/1:1.36	0/1:1.34	1/1:0.22	0/1:1.54	1/1:0.18	0/1:1.46	1/1:0.24	1/1:0.22	1/1:0.16	1/1:0.28	1/1:0.16	1/1:0.16	1/1:0.14	1/1:0.28	1/1:0.32	1/1:0.26	1/1:0.16	1/1:0.16	1/1:0.28
14	4623001	-0.00557454	-0.00394229	RALYL(dist=124735),LOC102173863(dist=6313)	intergenic	14:4623001-4626500	CN0	0.759536	0/0:2.08	0/0:2.34	0/0:2.06	0/1:1.3	0/0:2.22	0/1:1.46	0/0:2.08	0/0:2.72	0/1:1.2	0/0:2.08	0/1:1.16	0/1:1.2	0/0:2.26	0/0:2.46	0/1:1.28	0/0:2.06	0/0:2.38	0/0:2.28	0/0:1.68	0/1:1.52	0/1:1.2	0/0:2.06	0/1:1.26	0/1:1.24	0/1:1.28	0/1:1.44	0/0:1.8	0/0:2.34	0/0:2.04	0/0:1.78	0/1:0.98	0/0:1.82	0/0:2.14	0/0:2.18	0/0:2.18	0/0:2.12	1/1:0.1	0/1:0.88	0/0:2.08	0/0:1.98	0/0:2.48
14	5582501	-0.00650936	-0.00304499	PSKH2(dist=3491),ATP6V0D2(dist=26526)	intergenic	14:5582501-5587000	CN0	0.839227	1/1:0.06	0/1:1.14	1/1:0.0	0/0:2.28	0/1:0.98	0/1:0.88	0/1:1.04	1/1:0.06	0/0:1.92	0/1:1.28	0/0:1.98	0/0:2.1	0/0:1.84	0/1:0.98	0/1:1.0	0/0:2.0	1/1:0.0	0/0:2.26	1/1:0.08	1/1:0.06	0/0:2.0	1/1:0.02	0/0:1.98	0/1:1.12	0/1:0.98	0/0:2.1	1/1:0.0	0/1:1.0	0/1:1.0	0/0:1.78	0/0:2.08	0/0:1.82	0/0:1.7	0/1:1.12	0/0:2.24	0/0:2.32	0/0:2.2	0/0:2.0	0/0:2.16	0/0:2.26	0/0:1.74
14	6500001	0.000482727	-0.00206353	CNBD1	intronic	14:6500001-6504500	CN2,CNH	0.733715	0/0:2.22	0/0:2.1	0/0:2.18	0/0:2.1	0/0:2.18	0/0:2.08	0/0:2.18	0/1:2.62	0/1:3.1	0/0:2.06	0/0:1.9	0/0:2.02	0/0:2.06	0/0:2.2	0/0:2.04	0/0:2.0	0/0:1.68	0/0:2.2	0/0:1.9	0/0:2.34	0/0:2.24	0/0:2.22	0/0:2.08	0/0:1.98	0/0:2.16	0/0:2.36	0/0:2.08	0/0:2.12	0/0:2.08	0/0:2.2	0/0:1.98	0/0:1.88	0/0:1.8	0/0:2.08	0/0:1.96	0/1:2.86	0/0:1.96	0/0:1.96	0/0:2.06	0/1:3.0	0/1:3.42
14	6791501	0.00746084	-0.0055789	CNBD1	intronic	14:6791501-6799000	CN0,CN2	0.683442	0/1:1.36	0/0:2.14	0/1:1.34	0/0:2.2	0/0:2.26	0/0:2.28	1/1:0.42	0/0:2.42	0/0:2.4	0/0:2.16	0/0:2.24	0/1:1.16	0/1:1.28	0/1:1.12	1/1:0.4	0/1:1.24	0/0:2.36	0/0:2.34	0/0:2.08	1/1:0.18	0/1:1.4	0/1:1.18	0/0:2.24	0/1:1.36	0/0:2.14	0/1:1.34	0/0:2.38	0/1:1.32	1/1:0.26	0/1:1.04	1/1:0.2	0/0:1.94	0/1:1.18	1/1:0.2	0/1:1.32	1/1:0.26	1/1:0.16	1/1:0.16	0/0:1.82	1/1:0.14	0/0:2.12
14	7326001	0.0258014	-0.00178632	CNBD1(dist=507963),MMP16(dist=128318)	intergenic	14:7326001-7329000	CN0,CN2	0.663265	0/1:1.16	0/1:1.18	0/0:2.2	0/0:2.3	0/0:1.84	0/0:2.28	1/1:0.06	0/2:2.96	0/1:1.24	1/1:0.16	0/0:1.62	0/1:1.28	0/0:1.96	1/1:0.72	1/1:0.08	0/1:1.02	0/0:2.36	0/2:2.68	1/1:0.48	0/1:1.38	0/1:1.26	0/1:1.28	0/1:1.16	0/1:1.08	0/1:1.1	1/1:0.12	0/1:1.36	0/1:1.3	0/1:1.44	0/1:0.98	0/1:1.1	1/1:0.04	0/0:2.24	1/1:0.1	0/1:1.08	0/1:1.18	1/1:0.04	1/1:0.04	1/1:0.0	0/1:1.04	1/1:0.14
14	9720501	0.0713189	0.0232075	SLC26A7(dist=566155),RUNX1T1(dist=71167)	intergenic	14:9720501-9725500	CN0	0.793423	0/1:0.9	1/1:0.0	0/0:1.72	0/0:1.88	0/0:2.22	1/1:0.0	0/1:1.14	0/0:1.98	0/1:1.06	0/1:0.94	0/0:2.38	0/0:1.82	0/0:1.94	0/0:2.14	0/0:2.3	0/0:1.86	0/0:2.06	0/1:1.28	0/1:0.74	0/0:2.32	0/0:2.06	0/1:1.2	1/1:0.0	0/0:1.72	0/1:1.06	0/0:2.12	0/0:1.96	0/1:1.14	0/0:1.86	0/1:1.1	0/0:2.02	0/0:1.48	0/0:1.94	0/0:1.9	0/1:1.14	0/0:2.02	0/0:1.64	0/0:1.86	0/0:2.3	0/0:2.14	0/0:1.66
14	13501001	0.0274909	0.00927667	TRNAS-AGA(dist=345891),GDF6(dist=635236)	intergenic	14:13501001-13504000	CN0	0.736247	0/0:1.94	0/0:1.78	0/1:1.38	0/0:1.58	0/0:2.26	0/1:1.4	0/1:0.92	0/1:1.28	0/0:2.04	0/1:1.36	0/0:1.88	0/0:2.2	0/1:1.28	0/0:2.32	0/0:2.04	0/1:1.12	0/0:1.96	0/0:2.16	0/0:2.14	1/1:0.26	0/1:1.1	0/1:1.42	0/1:1.46	0/1:1.3	0/1:1.28	0/1:0.94	0/0:2.32	0/1:1.32	1/1:0.42	0/0:1.86	0/0:2.14	0/0:2.5	0/0:2.26	0/1:1.2	0/0:2.0	0/0:1.66	0/0:2.1	0/0:2.16	0/0:1.74	0/0:2.16	0/0:2.04
14	24776501	-0.00649273	-0.000847013	ABRA(dist=440805),ANGPT1(dist=107475)	intergenic	14:24776501-24779500	CN0	0.650414	0/0:1.92	1/1:0.3	0/0:2.06	0/0:1.92	0/0:2.22	0/0:1.74	0/0:1.82	0/0:1.84	1/1:0.16	0/0:1.78	0/0:1.68	0/0:2.16	0/0:2.02	0/0:2.5	0/0:2.22	0/1:1.1	0/0:2.02	0/0:1.94	0/0:2.22	0/0:2.18	0/1:1.5	0/0:1.94	0/0:2.0	0/0:2.0	0/0:1.88	0/0:1.62	0/0:2.04	0/0:1.66	0/0:2.44	0/0:1.68	0/0:1.98	0/0:1.88	0/1:0.94	0/0:2.02	0/0:1.72	0/0:2.02	0/0:2.16	0/0:1.68	0/0:1.86	0/0:1.8	0/0:2.04
14	26513001	0.0852542	0.0344485	EMC2(dist=296431),LOC108637522(dist=17911)	intergenic	14:26513001-26516000	CN0,CN2	0.743594	0/1:0.9	0/0:1.94	0/0:2.06	0/1:1.08	0/1:1.02	0/1:1.1	0/1:0.98	0/1:1.02	0/1:1.22	1/1:0.3	0/1:0.96	0/1:1.02	0/1:1.06	0/2:2.78	1/1:0.22	0/1:0.9	0/1:1.2	1/1:0.52	1/1:0.44	0/1:1.24	0/1:1.18	0/1:1.0	0/1:1.18	0/0:2.0	0/1:1.08	1/1:0.36	0/1:1.24	0/1:0.86	0/1:0.9	0/0:1.9	0/0:1.88	0/1:1.0	0/0:2.12	0/0:2.04	0/1:1.3	1/1:0.3	0/0:2.08	0/1:0.98	0/1:1.18	1/1:0.26	0/1:1.44
14	29720001	0.0021215	-0.00249554	TRNAE-UUC(dist=835788),LOC108633261(dist=181805)	intergenic	14:29720001-29726500	CN0	0.819947	0/0:2.04	0/0:1.78	1/1:0.0	0/0:2.04	0/1:0.82	0/1:1.0	0/0:2.08	0/0:2.02	0/0:1.74	0/0:1.74	0/0:2.22	0/0:1.76	0/1:0.96	0/0:2.16	0/0:2.26	0/0:1.8	1/1:0.06	0/0:2.0	0/0:1.72	0/0:1.62	0/1:0.98	0/0:2.0	0/1:0.98	0/0:1.78	0/1:0.9	0/1:0.94	1/1:0.0	0/0:2.02	0/0:1.76	0/0:1.78	0/1:1.0	0/0:1.72	0/1:0.92	0/0:2.06	1/1:0.04	1/1:0.04	0/0:1.74	0/0:2.06	0/0:1.84	1/1:0.02	0/0:1.66
14	30551001	-0.00222915	-0.00432201	LOC108637478	intronic	14:30551001-30553500	CN2	0.670826	0/0:2.18	0/0:2.34	0/0:1.44	0/0:2.46	0/0:1.92	0/0:2.02	0/0:2.2	0/1:3.12	0/0:1.84	0/0:1.84	0/1:3.16	0/0:1.8	0/0:2.3	0/0:1.96	0/0:2.1	0/0:1.82	0/1:2.56	0/0:1.98	0/0:2.04	0/0:2.4	0/0:2.14	0/0:1.9	0/0:2.36	0/0:1.94	0/0:2.14	0/0:2.42	0/0:2.26	0/0:2.34	0/0:2.28	0/0:1.86	0/0:2.02	0/0:1.84	0/0:1.82	0/0:2.3	0/0:2.34	0/0:1.94	0/0:2.02	0/0:1.76	0/0:1.98	0/0:1.88	0/0:2.3
14	38980501	0.0182203	-0.00104014	MRPS28(dist=55512),HEY1(dist=96862)	intergenic	14:38980501-38992000	CN2	0.842913	0/0:2.12	0/0:2.2	0/0:2.16	0/0:2.1	0/0:2.18	0/0:2.26	0/0:2.22	0/0:2.4	0/0:2.2	0/0:2.12	0/0:2.16	0/0:2.16	0/0:1.9	0/0:2.08	0/0:2.22	0/0:2.2	0/0:2.04	0/0:2.38	0/0:2.04	0/0:2.06	0/0:1.96	0/0:2.16	0/0:2.14	0/0:2.12	0/0:2.14	0/0:2.04	0/0:2.08	0/0:2.06	0/0:2.04	0/0:2.08	0/0:1.98	0/0:1.82	0/0:2.1	0/0:2.06	0/0:2.22	0/0:2.02	0/0:2.0	0/0:2.16	0/0:2.18	0/0:2.12	0/0:2.1
14	39240001	0.0110362	0.027273	STMN2	intronic	14:39240001-39246000	CN0	0.800087	0/0:1.82	0/1:0.96	0/1:1.12	0/0:1.98	0/0:1.86	0/0:1.58	0/0:1.68	0/1:0.9	0/0:2.12	0/1:1.04	0/0:2.52	0/0:1.82	0/0:1.84	0/0:1.44	0/0:1.84	0/1:0.94	0/0:1.96	0/1:1.2	0/0:1.68	0/0:1.8	0/0:1.84	0/0:1.84	0/0:2.14	0/0:1.7	0/0:2.16	0/0:1.98	0/0:1.84	0/0:1.68	0/0:1.98	0/0:2.08	0/0:2.08	0/0:2.2	0/0:1.92	0/0:2.12	0/0:1.96	0/0:2.08	0/0:2.3	0/0:1.9	0/0:1.82	0/0:2.02	0/0:1.86
14	50431001	-0.00806351	-0.00443555	CPA6	intronic	14:50431001-50439500	CN0	0.862668	0/0:2.06	0/0:2.14	0/0:2.1	0/0:1.98	0/0:2.04	0/0:1.92	0/0:2.16	0/0:2.3	0/0:2.04	0/0:1.96	0/0:2.16	0/0:1.86	0/0:1.98	0/0:2.06	0/0:2.14	0/0:2.0	0/0:1.9	0/1:0.92	0/0:1.96	0/0:2.02	0/0:2.22	0/0:2.02	0/1:1.14	0/0:2.14	0/0:1.96	0/0:2.22	0/0:1.78	0/0:2.08	0/0:2.06	0/0:1.92	0/0:1.94	0/0:2.02	0/0:1.8	0/0:1.76	0/0:2.14	0/0:2.08	0/0:1.9	0/0:2.14	0/0:2.0	0/0:2.06	0/0:2.04
14	64545501	0.0970368	0.022785	HAS2(dist=570150),ZHX2(dist=521484)	intergenic	14:64545501-64551500	CN2	0.663733	0/0:2.36	0/0:2.38	0/0:2.4	0/0:2.16	0/0:2.5	0/1:2.64	0/1:2.64	0/1:2.7	0/0:2.42	0/1:2.94	0/0:2.3	0/0:2.32	0/0:2.28	0/1:3.0	0/1:2.84	0/0:2.4	0/0:2.26	0/1:2.7	0/0:2.48	0/0:2.26	0/0:2.32	0/0:2.38	0/1:2.62	0/0:2.32	0/1:2.64	0/1:2.82	0/0:2.2	0/0:2.42	0/0:2.34	0/0:2.4	0/0:2.06	0/0:2.32	0/0:2.26	0/0:2.34	0/0:2.1	0/0:2.18	0/0:2.24	0/1:2.74	0/0:2.42	0/0:2.3	0/0:2.06
14	68307001	-0.00227392	-0.00432543	LOC102180847,LOC108637486	exonic	14:68307001-68400500	CN0,CN2	0.779521	0/2:2.88	0/2:2.94	0/2:3.04	0/2:2.96	0/2:2.96	0/2:2.96	0/0:1.9	0/2:3.04	0/2:2.9	0/2:3.1	0/2:2.92	0/2:2.86	2/2:3.82	0/2:3.42	0/2:2.88	0/2:2.86	0/0:2.02	0/2:3.14	0/2:2.88	0/2:2.82	0/2:2.8	0/2:2.94	0/2:2.84	0/0:1.94	0/2:3.08	0/2:3.02	0/2:3.16	0/2:3.04	0/2:3.04	0/2:2.8	0/2:2.8	0/0:1.86	0/2:2.88	0/2:2.8	0/2:2.88	0/2:2.8	0/2:2.84	0/2:2.92	0/2:3.04	0/2:2.96	2/2:3.68
14	82808501	-0.00678296	-0.00221981	PHF3(dist=687788),TRNAS-GGA(dist=1830411)	intergenic	14:82808501-82812500	CN0	0.770226	0/0:2.02	0/0:1.92	0/0:1.96	0/0:1.8	0/0:2.0	0/0:1.44	0/0:2.04	0/0:1.62	0/0:1.78	1/1:0.0	0/0:1.98	0/0:1.92	0/0:1.9	0/0:1.68	0/0:2.04	0/0:1.96	0/1:0.96	0/0:1.82	0/1:0.84	0/0:2.08	0/0:2.18	0/0:1.92	0/1:1.0	0/0:1.94	0/1:0.94	0/0:1.62	0/0:2.02	0/0:1.76	0/0:2.4	0/0:1.6	0/0:2.08	1/1:0.0	0/1:0.88	0/1:1.14	0/0:1.84	1/1:0.0	1/1:0.0	1/1:0.0	0/1:1.0	1/1:0.0	0/0:2.58
14	83662001	0.0105411	-0.00693444	PHF3(dist=1541288),TRNAS-GGA(dist=972411)	intergenic	14:83662001-83670500	CN0	0.810097	0/0:2.16	0/0:1.96	0/0:2.34	0/0:2.22	0/0:2.14	1/1:0.0	0/0:2.0	0/1:1.18	0/0:1.98	0/1:1.18	0/1:1.12	0/0:2.04	0/0:2.08	1/1:0.08	0/0:2.22	0/0:1.84	0/0:2.22	0/0:2.18	0/0:2.0	0/0:2.1	0/0:2.18	0/0:2.06	0/0:2.04	0/1:1.18	0/1:1.12	0/0:2.12	0/0:2.18	0/0:1.92	0/0:2.16	0/0:1.82	0/0:2.02	0/0:2.08	0/0:2.02	0/0:1.96	0/0:2.08	0/0:1.94	0/0:1.9	0/0:2.04	0/0:1.88	0/0:2.0	0/0:2.66
14	84437001	0.0827539	0.0237584	NONE(dist=NONE),TRNAS-GGA(dist=201911)	intergenic	14:84437001-84441000	CN0	0.674574	0/1:1.02	0/0:1.8	0/1:1.04	0/1:1.0	0/1:1.02	0/0:2.02	0/0:1.78	0/0:2.16	0/0:1.68	0/0:1.62	0/1:0.96	0/1:1.08	0/1:1.06	1/1:0.0	0/1:1.0	0/0:1.96	0/0:1.9	0/0:1.58	0/1:1.14	0/0:2.06	0/0:2.06	0/0:2.1	0/0:2.16	0/1:1.16	0/0:1.86	0/0:1.82	0/1:1.08	0/1:1.0	0/0:1.56	0/0:1.8	0/0:2.38	0/0:1.82	0/0:1.9	0/0:1.88	0/0:1.9	0/0:1.8	0/0:2.02	0/0:1.86	0/0:1.86	0/0:1.8	0/0:1.96
14	84885501	0.00360021	-0.00463727	LOC108637487	ncRNA_exonic	14:84885501-84888500	CN0	0.699287	0/1:1.26	1/1:0.22	1/1:0.2	1/1:0.4	1/1:0.22	1/1:0.14	1/1:0.3	0/0:1.64	1/1:0.22	0/1:0.48	0/1:0.52	1/1:0.32	0/0:1.52	0/0:1.96	1/1:0.32	1/1:0.28	1/1:0.34	1/1:0.42	0/1:1.02	1/1:0.3	1/1:0.32	0/1:1.26	1/1:0.2	0/1:0.84	1/1:0.22	0/1:0.5	0/1:1.36	0/1:0.46	0/1:0.6	1/1:0.4	1/1:0.3	1/1:0.24	1/1:0.22	1/1:0.2	1/1:0.22	1/1:0.22	1/1:0.32	1/1:0.4	1/1:0.26	1/1:0.16	1/1:0.18
14	85682001	0.0257529	0.0159982	LOC108637487(dist=794426),NONE(dist=NONE)	intergenic	14:85682001-85701000	CN0	0.974116	0/1:1.1	1/1:0.02	1/1:0.04	0/1:0.92	0/1:0.96	1/1:0.0	1/1:0.02	1/1:0.08	1/1:0.04	1/1:0.04	0/1:1.14	1/1:0.04	0/1:1.14	1/1:0.0	0/1:1.14	1/1:0.04	1/1:0.04	1/1:0.0	1/1:0.0	1/1:0.06	1/1:0.02	1/1:0.02	1/1:0.04	0/1:0.94	1/1:0.0	1/1:0.0	1/1:0.04	0/1:1.16	1/1:0.06	1/1:0.0	1/1:0.0	1/1:0.02	1/1:0.0	1/1:0.02	1/1:0.0	1/1:0.0	1/1:0.0	1/1:0.02	1/1:0.02	1/1:0.02	1/1:0.04
14	86486001	-0.0101469	0.00423979	LOC108637487(dist=1598426),LOC106502806(dist=1316976)	intergenic	14:86486001-86492500	CN0	0.797676	0/0:2.06	0/0:2.06	0/0:1.94	0/0:2.38	0/0:1.98	0/0:2.34	0/0:2.04	0/0:2.28	0/1:1.02	0/0:2.38	0/0:2.14	0/0:2.34	0/0:2.04	0/0:2.44	0/0:2.32	0/0:1.96	0/0:2.14	0/0:2.4	0/0:2.06	0/0:2.46	0/0:2.2	0/0:1.98	0/0:2.18	0/0:2.12	0/0:1.92	0/0:2.2	0/0:2.36	0/0:2.34	0/0:2.02	0/0:1.96	0/0:2.04	0/0:1.76	0/0:2.26	0/0:2.2	0/0:1.92	0/0:2.28	0/0:2.08	0/1:1.02	0/0:2.04	0/0:1.8	0/0:2.18
14	86833001	0.114192	0.0833452	LOC108637487(dist=1945426),LOC106502806(dist=972476)	intergenic	14:86833001-86837000	CN0,CN2	0.671618	0/0:1.92	0/0:1.84	0/0:1.88	0/0:2.18	0/0:2.14	0/0:1.78	0/1:1.14	0/1:1.46	0/0:2.16	0/0:1.88	0/0:2.18	0/0:2.08	0/0:2.36	0/0:2.18	0/2:2.56	1/1:0.04	0/0:2.4	0/0:2.28	0/2:2.5	0/0:2.0	0/2:2.56	0/0:2.36	0/0:2.1	0/0:1.86	0/0:2.3	0/2:2.56	0/0:2.32	0/0:1.98	0/0:2.08	0/1:0.98	0/0:1.76	0/0:1.94	0/0:2.16	0/0:2.0	0/0:2.42	0/0:1.88	0/0:1.96	0/0:2.24	1/1:0.02	0/0:1.94	0/0:1.66
14	86997001	0.0227167	0.00314431	NONE(dist=NONE),LOC106502806(dist=805476)	intergenic	14:86997001-87004000	CN0	0.80832	0/1:1.1	0/0:1.92	0/0:1.94	0/1:1.06	0/1:1.04	0/1:0.88	0/0:2.16	0/1:1.4	0/1:1.14	0/1:1.02	0/1:1.14	0/0:1.92	0/1:1.12	0/1:0.94	0/1:1.1	0/0:2.12	0/0:2.02	0/0:2.08	0/1:1.26	0/0:2.26	0/0:2.3	1/1:0.02	0/0:1.92	1/1:0.28	0/1:0.94	0/0:2.38	0/0:1.96	1/1:0.04	0/0:2.14	0/0:1.64	0/0:1.98	0/0:1.98	0/0:1.96	0/0:1.84	0/0:2.14	0/0:2.04	1/1:0.02	1/1:0.02	0/0:1.9	0/0:2.0	0/0:2.04
14	87154501	0.0250992	0.000417755	NONE(dist=NONE),LOC106502806(dist=648476)	intergenic	14:87154501-87161000	CN0	0.792522	0/0:2.06	0/0:1.94	0/0:1.66	0/0:2.26	0/0:1.88	0/0:1.92	0/0:2.02	0/1:1.34	0/1:1.06	0/0:2.32	0/1:1.04	0/0:1.82	0/0:1.98	0/1:1.22	0/1:1.1	0/0:1.82	0/0:2.18	0/0:1.86	0/1:1.24	0/0:2.16	0/0:2.16	0/1:1.22	0/0:2.14	0/1:1.28	0/0:2.04	0/0:2.48	0/0:1.8	0/0:2.34	0/0:2.06	0/0:1.92	0/0:1.92	0/0:1.9	0/0:2.08	0/0:2.2	0/0:2.08	0/0:1.96	0/0:2.04	0/0:2.22	0/0:2.02	0/0:2.1	0/0:2.4
14	88084501	0.0294863	0.000859703	LOC106502806(dist=272794),LOC108637501(dist=776495)	intergenic	14:88084501-88090500	CN2,CNH	0.737373	0/0:1.84	0/0:1.94	0/0:2.36	0/0:2.16	0/0:2.2	0/0:2.34	0/0:2.14	0/0:2.36	0/0:2.18	0/0:2.0	0/0:1.98	0/0:2.04	0/0:2.2	0/0:2.04	0/0:2.28	0/0:2.28	0/0:1.7	0/0:2.16	0/0:1.7	0/0:2.02	0/0:2.18	0/0:2.2	0/0:2.14	0/0:2.0	0/0:2.22	0/0:2.26	0/0:1.94	0/0:1.78	0/0:2.2	0/0:1.88	0/0:1.92	0/0:1.76	0/0:2.06	0/0:2.0	0/0:1.98	0/0:1.9	0/0:2.02	0/0:1.96	0/0:1.88	0/0:2.12	0/0:2.02
14	89155501	-0.00343189	-0.00279351	ADGRB3	intronic	14:89155501-89158500	CN0,CN2	0.704835	0/1:1.2	0/1:1.08	0/1:1.16	0/0:2.16	0/1:0.96	0/1:0.72	0/0:2.1	0/1:1.16	0/1:1.02	0/0:1.86	0/0:2.0	0/0:2.28	0/1:1.14	0/1:0.92	0/1:1.1	0/1:1.3	0/1:1.1	1/1:0.08	0/0:2.22	0/1:1.18	0/0:1.96	0/1:0.96	1/1:0.04	0/0:2.14	1/1:0.06	0/0:2.26	0/0:2.24	1/1:0.0	1/1:0.02	0/1:0.9	1/1:0.0	1/1:0.0	0/0:2.26	0/1:1.2	0/0:2.22	0/1:1.06	0/0:1.96	0/0:2.26	0/0:2.12	0/0:2.1	1/1:0.02
14	92542001	0.185443	0.0798156	MIR30A(dist=341801),RIMS1(dist=210865)	intergenic	14:92542001-92545500	CN0,CN2	0.693981	0/1:1.16	0/0:2.12	0/1:1.42	0/1:1.22	0/1:1.28	0/1:1.2	1/1:0.04	1/1:0.0	0/0:2.16	0/0:2.16	1/1:0.0	1/1:0.06	1/1:0.02	0/1:1.04	1/1:0.04	0/1:0.94	1/1:0.0	0/1:1.0	0/0:1.8	1/1:0.04	0/0:2.2	0/1:1.12	0/0:2.18	0/1:1.34	0/0:2.24	0/1:1.4	0/0:2.3	0/1:1.22	1/1:0.0	0/1:0.88	0/0:2.1	0/0:2.04	0/0:2.14	0/0:2.34	0/0:2.28	0/0:2.0	0/0:1.86	0/0:2.16	0/0:2.24	0/0:2.08	0/2:2.58
15	942501	-0.00147672	0.0103616	LOC102168475(dist=6842),LOC102173289(dist=4867)	intergenic	15:942501-952500	CN0,CN2	0.669444	0/2:2.84	0/2:2.84	0/2:2.6	0/2:2.5	0/2:3.08	0/2:2.66	0/2:3.0	0/2:3.06	0/2:2.96	0/2:2.6	0/2:2.64	0/2:2.86	0/2:3.06	0/2:2.54	0/2:3.28	0/2:2.92	0/2:3.06	0/2:3.16	0/2:2.6	0/2:3.04	0/2:2.68	0/2:3.2	0/2:3.14	0/2:2.74	0/2:3.3	0/2:3.04	0/0:2.38	0/2:2.88	0/2:3.04	0/2:2.52	0/2:2.64	0/0:2.42	0/2:2.92	0/2:2.86	0/2:2.96	0/2:2.84	0/2:2.58	0/2:2.76	0/2:3.0	0/2:2.56	0/0:1.96
15	956001	-0.000330902	0.00851167	LOC102173289	exonic	15:956001-968500	CN0,CN2	0.664799	0/0:2.36	0/0:2.28	0/0:2.1	0/0:2.32	0/0:2.4	0/0:2.18	0/0:2.34	0/2:2.52	0/0:2.16	0/0:2.44	0/2:2.56	0/0:2.12	0/0:2.18	0/2:2.54	0/2:2.72	0/0:2.14	0/0:2.22	0/2:2.58	0/0:2.14	0/0:2.24	0/0:2.16	0/0:2.14	0/0:2.3	0/0:2.2	0/0:2.2	0/0:2.34	0/0:2.06	0/0:2.14	0/0:2.2	0/0:2.28	0/0:2.02	0/0:2.1	0/0:2.2	0/0:2.04	0/0:2.16	0/0:2.06	0/0:2.1	0/0:2.32	0/0:2.42	0/0:2.12	0/0:2.06
15	989501	-0.00110561	0.00954321	LOC102168904	exonic	15:989501-1014500	CN0,CN2	0.791571	0/2:2.74	0/2:2.58	0/2:2.72	0/2:2.52	0/2:2.82	0/2:2.56	0/2:2.66	0/2:3.04	0/2:2.74	0/2:2.62	0/2:2.9	0/2:2.64	0/2:2.74	0/2:2.72	0/2:2.86	0/2:2.62	0/2:2.66	0/2:2.66	0/2:2.54	0/2:2.9	0/2:2.58	0/2:2.64	0/2:2.8	0/2:2.68	0/2:2.62	0/2:2.78	0/2:2.76	0/2:2.76	0/2:2.84	0/2:2.7	0/2:2.54	0/0:2.38	0/2:2.64	0/2:2.58	0/2:2.86	0/2:2.66	0/2:2.44	0/2:2.76	0/2:2.7	0/2:2.66	0/2:2.48
15	2827001	0.0254801	0.0251582	APLNR(dist=1437),LRRC55(dist=52099)	intergenic	15:2827001-2830500	CN2	0.719097	0/0:1.9	0/0:1.98	0/0:1.88	0/0:1.98	0/0:1.94	0/0:2.14	0/0:2.3	0/0:2.12	0/0:2.18	0/0:1.44	0/0:2.22	0/0:2.16	0/0:1.96	0/0:1.84	0/0:2.16	0/0:1.96	0/0:1.96	0/0:1.76	0/0:1.92	0/0:1.96	0/0:1.92	0/0:2.02	0/0:1.96	0/0:1.84	0/0:2.28	0/0:1.96	0/0:2.06	0/0:1.9	0/0:2.0	0/0:2.02	0/0:2.44	0/0:1.98	0/0:1.96	0/0:2.14	0/0:1.94	0/0:2.06	0/0:1.82	0/0:2.12	0/1:2.48	0/0:1.92	0/0:1.96
15	3186001	-0.0068613	0.0100391	LOC102169497(dist=62350),LOC102168655(dist=17410)	intergenic	15:3186001-3246000	CN2,CNH	0.752339	0/1:2.9	1/1:3.76	0/1:3.08	1/2:5.04	1/1:4.22	1/2:4.54	1/1:4.12	0/1:3.14	0/1:3.0	1/1:4.06	1/1:4.06	2/2:5.7	1/1:3.92	1/1:4.18	1/2:4.34	0/1:2.96	1/1:3.98	1/1:3.82	1/1:3.78	2/2:5.24	1/1:3.9	1/1:3.98	1/1:4.0	1/1:3.74	2/2:6.74	1/1:4.1	1/2:4.92	1/1:3.82	1/1:3.84	1/1:3.44	0/1:2.8	1/1:4.12	0/1:2.92	0/1:2.88	0/1:2.9	0/0:1.94	1/1:3.52	1/1:3.94	1/1:3.92	0/1:2.84	1/2:4.44
15	3311501	0.0687846	0.0337994	LOC102191446(dist=1220),LOC102182616(dist=6756)	intergenic	15:3311501-3316000	CN2	0.782724	0/1:2.94	0/0:2.08	0/0:1.96	0/0:2.22	0/0:2.02	0/0:1.88	0/0:2.12	0/1:3.02	0/0:2.12	1/1:3.92	1/1:4.5	0/0:2.26	0/1:2.96	0/0:2.3	0/1:3.16	0/0:2.04	0/0:1.72	0/1:3.34	1/1:4.36	0/0:1.84	0/0:2.3	0/0:2.3	0/0:2.0	0/0:1.96	0/0:2.48	0/1:3.32	0/0:1.94	0/0:2.2	0/1:3.02	0/0:1.98	0/0:2.24	0/1:3.46	0/0:2.02	0/0:2.1	0/0:1.96	0/0:2.04	0/0:1.98	0/0:1.7	0/0:2.0	0/0:2.16	0/0:2.06
15	3374001	0.00421421	0.00117298	LOC102181800	exonic	15:3374001-3379000	CN0	0.801714	0/0:1.92	0/0:1.9	0/0:1.94	0/0:1.88	0/0:1.76	0/0:2.22	0/0:2.14	0/0:2.32	0/1:1.14	0/0:1.96	0/0:2.3	0/0:1.92	0/0:1.94	0/0:2.08	0/0:2.12	0/0:1.86	0/0:2.14	0/0:2.02	0/0:1.98	0/0:1.88	0/1:1.12	0/0:1.98	0/0:2.1	0/0:2.02	0/0:1.9	0/0:2.42	0/0:2.18	0/0:2.3	0/0:2.34	0/0:2.02	0/0:1.88	0/0:2.14	0/0:1.84	0/0:2.04	0/0:2.16	0/0:2.08	0/1:1.18	0/0:2.06	0/0:1.74	0/0:1.9	0/0:1.8
15	4196001	-0.00776994	-0.00215609	LOC106501745(dist=2141),LOC102175782(dist=2479)	intergenic	15:4196001-4199000	CN0	0.696884	0/0:2.08	0/0:1.96	0/0:2.5	0/0:2.2	0/0:1.84	0/0:1.92	0/0:2.06	0/0:1.7	0/1:1.52	0/1:1.5	0/0:1.92	0/0:1.98	0/0:2.24	0/0:2.22	0/0:1.78	0/0:1.86	0/0:2.2	0/1:1.36	0/0:2.0	0/1:1.46	0/0:1.74	0/0:2.14	0/0:1.88	0/0:1.9	0/0:2.26	0/0:1.74	0/0:1.72	0/0:1.62	0/0:1.86	0/1:0.96	0/0:1.88	0/1:1.08	0/0:2.1	0/0:2.14	0/0:1.8	0/0:1.76	0/0:2.2	0/0:2.2	0/1:1.3	0/0:2.34	0/0:2.7
15	4258001	0.0249355	0.0130236	LOC102174954(dist=14645),LOC102173320(dist=11789)	intergenic	15:4258001-4263000	CN0	0.769896	0/0:1.9	0/0:1.98	0/0:2.08	0/0:2.16	0/0:1.92	0/0:1.86	0/0:2.04	0/0:2.16	0/0:1.94	0/0:2.02	0/0:1.86	0/1:1.16	0/0:2.14	0/0:1.9	0/0:2.4	0/0:1.98	0/0:1.98	0/0:1.9	0/0:2.36	0/0:2.16	0/0:2.2	0/0:2.06	0/1:1.24	0/0:1.96	0/0:2.38	0/0:1.7	0/1:1.24	0/0:2.12	0/0:2.14	0/0:1.98	0/1:1.16	0/0:1.76	0/0:2.16	0/0:2.12	0/0:2.14	0/0:1.86	0/0:1.94	0/0:1.86	0/0:1.96	0/0:2.36	0/0:2.04
15	4298001	-0.00276134	0.000223273	LOC102171084,LOC102171357,LOC102183146,LOC102183417,LOC102185741,LOC102190601,LOC102190875,LOC108637601,LOC108637602,LOC108637623,LOC108637624,LOC108637625	exonic	15:4298001-4446000	CN0,CN2,CNH	0.777407	0/1:1.04	0/1:1.02	0/1:0.94	0/2:2.78	0/2:2.4	0/1:1.0	0/0:1.76	0/2:2.64	0/2:2.82	0/1:1.02	0/1:1.08	0/1:1.0	0/1:1.04	0/1:1.2	0/1:1.02	0/0:1.7	0/2:2.68	0/0:1.84	0/1:1.1	0/0:1.96	2/2:4.26	0/2:2.7	0/1:1.18	0/2:2.5	0/0:1.92	0/1:0.9	0/1:1.08	0/0:1.86	0/1:1.08	0/0:1.84	0/1:1.06	0/2:2.8	0/2:2.54	0/1:1.04	0/2:3.4	0/2:2.9	0/0:2.02	0/2:2.66	0/0:1.96	2/2:3.84	0/1:1.24
15	4663501	0.0156762	0.0187791	LOC102169979(dist=8239),LOC102169687(dist=13819)	intergenic	15:4663501-4667500	CN0	0.728911	0/0:2.34	0/0:2.28	0/0:2.14	1/1:0.32	1/1:0.22	1/1:0.2	0/0:2.2	1/1:0.22	0/0:2.32	0/0:1.92	0/0:2.68	0/0:2.22	0/0:2.22	0/0:2.54	0/0:1.46	0/0:2.12	0/1:1.34	0/0:1.5	0/0:2.16	0/0:2.48	1/1:0.38	0/1:1.34	1/1:0.3	0/1:1.4	1/1:0.34	0/0:2.56	0/0:1.46	0/0:2.18	0/0:2.28	0/1:1.12	0/0:2.14	0/0:2.16	0/1:1.26	0/0:2.26	0/0:2.12	0/0:1.86	0/0:1.8	0/0:2.0	0/0:1.84	0/0:2.02	0/0:1.56
15	4672001	-0.00496538	0.0155061	LOC102169979(dist=16739),LOC102169687(dist=4819)	intergenic	15:4672001-4676500	CN0,CN2	0.653458	0/0:2.14	0/0:2.12	0/1:1.1	0/0:2.16	0/0:2.16	0/0:2.36	0/0:2.36	0/0:2.46	0/0:2.42	0/0:2.58	0/0:2.24	0/0:2.2	0/0:2.18	0/0:1.76	0/0:2.2	0/0:2.44	0/0:2.06	0/2:2.82	0/0:2.16	0/1:1.14	0/0:2.2	0/0:2.32	0/0:2.14	0/0:2.16	0/0:2.48	0/2:2.7	0/0:2.46	0/0:2.24	0/0:2.14	0/0:2.08	0/0:2.22	0/1:1.0	0/0:1.88	0/0:2.14	0/1:1.12	1/1:0.02	0/1:1.02	0/1:1.18	0/0:2.06	1/1:0.06	1/1:0.08
15	4849001	0.045354	0.0300597	LOC102168280(dist=15899),LOC108637605(dist=5201)	intergenic	15:4849001-4859000	CN0	0.858743	0/0:2.02	1/1:0.0	0/1:0.86	0/0:2.02	0/1:0.96	0/0:1.9	0/1:1.04	0/0:2.2	0/1:1.04	0/0:2.2	0/0:1.98	0/0:2.08	0/1:1.08	0/0:1.98	0/0:2.18	0/0:2.0	0/0:1.96	0/1:1.14	0/0:2.1	0/0:2.06	0/0:2.0	0/0:1.94	0/1:1.16	0/0:1.98	0/0:2.06	0/0:2.02	0/0:2.08	0/0:2.08	0/0:1.78	0/1:0.96	0/0:1.96	0/0:1.76	0/0:1.98	0/0:1.94	0/0:2.14	0/0:2.0	0/0:1.94	0/0:2.12	0/1:1.0	0/0:1.98	0/0:2.26
15	11108001	-0.00892823	-0.00511402	TRNAC-GCA(dist=1538127),LRRC4C(dist=1292045)	intergenic	15:11108001-11111500	CN0	0.824046	0/0:2.2	0/0:2.24	0/0:1.74	0/1:1.08	0/1:1.06	0/1:1.22	0/0:2.22	0/1:1.18	0/0:1.92	0/1:1.24	0/0:2.22	0/0:2.22	1/1:0.0	0/0:1.64	0/0:2.24	0/0:2.14	0/0:2.14	1/1:0.0	0/1:1.14	0/1:1.12	1/1:0.04	0/0:2.1	0/0:2.06	0/1:1.4	1/1:0.0	0/0:2.44	0/1:1.24	0/1:1.22	1/1:0.0	0/0:1.86	1/1:0.02	0/1:1.18	0/0:2.08	1/1:0.02	0/1:1.06	0/1:1.04	0/1:1.14	0/1:1.2	0/0:2.06	0/1:1.14	0/1:1.14
15	14577501	0.0131816	0.0175073	LRRC4C(dist=1981572),C15H11orf74(dist=1256298)	intergenic	15:14577501-14583000	CN0,CN2,CNH	0.707477	0/0:1.88	0/2:2.98	0/0:1.98	0/0:2.08	0/0:1.74	0/0:2.24	0/0:1.78	0/0:1.68	0/0:2.06	0/0:1.94	0/0:2.16	0/0:1.98	0/0:1.8	0/1:1.22	0/0:1.92	0/0:1.98	0/0:2.08	0/0:2.16	0/0:2.0	0/0:2.04	0/0:1.98	0/0:2.0	0/0:1.94	0/0:1.98	0/0:2.0	0/0:1.98	0/0:1.9	0/0:2.08	0/0:1.96	0/0:1.84	0/0:2.08	0/0:2.0	0/0:1.96	0/0:1.92	0/0:2.02	0/0:2.22	0/0:2.04	0/0:1.9	0/2:3.1	0/0:2.14	0/0:1.66
15	19537001	0.0080918	0.0079886	CCDC73	intronic	15:19537001-19540000	CN0,CN2	0.701488	0/0:1.98	0/1:1.04	0/0:2.1	0/0:1.92	0/1:1.08	0/0:1.86	0/1:1.0	0/2:2.64	0/0:1.94	0/0:2.32	0/0:2.36	0/1:1.2	0/0:2.06	0/0:2.04	0/0:2.12	0/1:1.02	0/0:1.96	0/0:2.2	0/0:1.72	0/0:2.38	0/0:2.18	0/1:0.96	0/0:2.0	0/0:1.88	0/0:1.9	0/1:1.38	0/0:1.8	0/0:2.28	0/0:2.36	0/1:0.84	0/1:1.0	0/0:1.8	0/0:1.92	0/0:1.92	0/0:2.0	0/0:2.16	0/0:1.88	0/0:2.34	0/1:1.12	0/0:1.74	0/1:0.96
15	23429501	-0.00790346	-0.00265176	KCNA4(dist=1248543),METTL15(dist=482548)	intergenic	15:23429501-23432000	CN0	0.668783	0/0:2.06	0/0:1.9	0/0:1.82	0/0:1.84	0/0:2.0	0/0:1.68	0/1:0.98	0/1:0.9	0/0:1.72	0/1:1.38	0/0:1.86	0/0:1.98	0/0:1.88	0/0:2.1	0/0:1.88	0/0:1.92	0/0:2.32	0/1:1.32	0/0:1.76	0/0:1.86	0/0:1.9	0/0:2.06	0/1:1.24	0/0:1.88	0/0:2.24	1/1:0.0	0/0:2.1	0/0:2.2	0/0:1.9	0/0:1.54	0/0:2.0	0/0:1.8	0/0:1.58	0/0:1.76	0/0:1.76	0/0:1.82	0/0:1.84	0/0:1.62	0/1:0.86	0/0:2.18	0/0:1.82
15	24641001	0.0306746	0.0126185	BDNF(dist=75113),LIN7C(dist=80859)	intergenic	15:24641001-24644500	CN0,CN2	0.720458	0/0:2.04	0/0:1.9	0/0:1.76	0/0:1.86	0/0:2.16	0/0:1.68	0/0:2.14	0/0:2.14	0/0:1.98	0/0:2.16	0/0:1.92	0/0:1.72	0/0:1.96	0/2:3.18	0/0:2.08	0/0:1.8	0/0:1.96	0/0:1.6	0/0:2.48	0/0:2.08	0/0:1.54	0/0:1.88	0/0:1.86	0/0:1.9	0/1:1.14	0/0:1.64	0/0:1.8	0/0:1.7	0/0:1.92	0/1:0.96	0/0:2.32	0/0:2.06	0/0:1.92	1/1:0.0	0/0:1.88	0/0:2.02	0/1:1.12	0/0:1.86	0/1:1.24	0/1:0.98	0/1:1.14
15	32819001	0.000516318	0.0116212	LOC102173403,LOC108637633	exonic	15:32819001-32827000	CN0,CN2	0.667041	0/2:3.12	0/0:2.18	0/2:3.06	0/2:3.12	0/2:3.26	0/2:3.28	0/2:3.08	0/2:3.44	0/0:2.14	0/2:3.22	0/2:3.24	0/2:3.0	0/2:3.02	0/2:3.46	0/2:3.1	0/2:2.98	0/2:3.12	0/2:3.02	0/2:3.1	0/2:2.98	0/2:2.68	0/2:3.06	0/0:2.2	0/2:2.8	0/2:3.0	0/2:3.26	0/2:3.12	0/2:3.22	0/2:3.16	0/2:2.88	0/2:2.94	0/2:3.0	0/2:3.24	0/2:2.92	0/2:3.12	0/2:3.08	0/2:3.04	0/2:3.02	0/2:3.1	0/2:3.02	0/2:2.52
15	33412501	-0.00709978	-0.00394103	LOC102191443(dist=2892),LOC102191157(dist=2477)	intergenic	15:33412501-33416000	CN0	0.7926	0/1:1.1	0/1:1.0	0/0:1.84	1/1:0.0	0/0:1.88	0/1:1.22	0/0:1.9	0/1:1.1	0/0:2.2	0/1:1.26	0/0:2.36	0/0:2.16	1/1:0.14	0/1:1.34	0/1:1.04	0/0:2.08	0/1:1.04	0/0:2.1	0/0:2.22	0/0:2.34	1/1:0.04	0/1:1.24	0/1:1.24	0/0:2.08	0/1:1.3	0/0:1.86	0/1:1.28	0/0:2.12	0/0:1.88	0/1:0.96	0/1:1.32	0/0:2.26	0/0:1.98	0/0:2.24	0/0:2.26	0/0:2.36	0/1:1.0	0/0:1.84	0/1:0.92	0/0:1.72	0/0:2.54
15	34407001	-0.00507973	-0.00478667	LOC102172282	exonic	15:34407001-34415500	CN0,CN2	0.764164	0/0:1.96	0/0:1.96	0/0:2.04	0/1:1.16	0/0:1.96	0/2:2.62	0/0:2.02	0/0:2.28	0/0:1.92	0/0:2.02	0/0:2.1	0/0:2.08	0/0:2.02	0/0:1.74	0/0:2.1	0/0:2.0	0/0:1.86	0/0:2.2	0/0:1.9	0/0:1.96	0/1:0.94	0/0:2.06	0/0:1.96	0/0:2.12	0/0:1.9	0/0:1.94	0/0:2.18	0/0:2.0	0/0:1.68	0/0:1.86	0/0:2.02	0/0:2.08	0/0:1.96	0/0:2.12	0/0:2.14	0/0:2.06	0/0:1.86	0/0:2.0	0/0:2.22	0/0:2.04	0/0:2.02
15	34785501	-0.00990981	-0.00309827	LOC108637672(dist=11897),LOC102179935(dist=2234)	intergenic	15:34785501-34788500	CN0	0.80919	0/0:2.22	0/1:1.2	0/0:2.02	0/0:2.4	0/1:1.1	0/0:2.06	0/0:2.14	0/0:1.92	0/1:1.1	0/1:1.3	0/1:1.44	1/1:0.12	0/0:2.52	0/0:1.92	0/1:1.3	0/1:1.28	0/1:1.26	0/0:1.88	1/1:0.12	0/0:1.86	0/0:2.0	0/1:1.14	0/1:1.34	0/0:2.06	0/1:1.0	0/0:1.76	0/0:2.1	0/1:0.9	0/1:1.12	0/0:2.16	0/0:1.96	0/0:2.24	0/0:1.98	0/0:1.98	0/0:2.28	0/0:2.14	0/0:2.08	0/0:2.0	0/0:2.08	0/0:1.84	0/0:1.96
15	34971001	0.0238214	0.00955975	LOC102181293	exonic	15:34971001-34984500	CN2	0.80161	0/0:1.98	0/0:1.98	0/1:3.26	0/1:3.04	0/1:2.82	0/1:2.88	1/1:3.86	1/1:3.88	0/0:2.08	0/1:3.22	0/0:2.12	0/0:2.08	0/1:2.84	0/1:2.88	0/1:2.78	0/1:2.92	0/0:1.98	0/0:2.34	0/1:2.88	0/1:3.08	1/1:4.16	0/1:2.84	0/0:2.02	1/1:3.7	0/0:1.94	0/1:2.6	1/1:3.8	0/0:2.16	0/1:3.08	0/0:2.08	0/0:1.94	0/0:2.24	1/1:3.68	0/0:2.08	1/1:3.76	1/1:4.02	0/1:2.9	0/1:2.74	0/0:2.08	1/1:3.92	0/0:2.1
15	35179001	0.0791213	0.0401622	LOC102190977(dist=4340),LOC102182987(dist=4708)	intergenic	15:35179001-35183500	CN0	0.779054	0/0:2.26	0/1:1.26	0/1:1.14	0/1:1.18	0/0:1.52	0/1:1.08	1/1:0.34	1/1:0.2	0/1:1.18	0/1:1.24	0/0:1.92	0/0:2.24	0/0:2.28	1/1:0.5	1/1:0.36	1/1:0.22	0/0:1.9	1/1:0.24	1/1:0.28	0/0:1.46	0/1:1.06	0/0:2.54	0/0:2.1	1/1:0.24	0/1:1.0	0/1:1.16	1/1:0.2	0/0:2.02	0/1:1.32	0/1:1.36	0/1:1.26	0/1:0.94	0/1:1.0	0/1:1.14	0/0:2.04	0/0:2.02	0/1:1.12	0/1:1.24	0/0:1.9	0/0:1.52	0/0:2.02
15	35203001	0.0114828	0.0262088	LOC108637634	exonic	15:35203001-35210500	CN0,CN2	0.753241	0/0:2.06	0/1:1.08	0/2:2.84	1/1:0.08	0/1:1.14	0/0:2.26	0/2:2.96	0/0:2.38	0/0:2.06	0/0:2.04	0/0:2.06	0/0:1.98	0/0:2.08	0/0:1.78	0/2:2.56	0/0:2.24	0/0:2.06	0/0:1.72	0/0:2.12	0/0:2.14	1/1:0.1	0/0:2.12	0/0:2.02	0/0:2.1	0/0:2.26	0/2:2.84	0/2:2.68	0/0:2.04	0/0:2.16	0/0:2.28	0/0:1.76	0/0:1.88	0/0:1.7	0/0:2.1	0/0:1.98	0/0:2.16	0/0:1.82	0/0:2.0	0/0:2.0	0/0:1.82	0/0:2.24
15	37610001	-0.00771204	-0.001971	LOC102185258(dist=24155),LOC102183585(dist=10427)	intergenic	15:37610001-37623000	CN0,CN2	0.888502	0/0:2.08	0/0:1.86	0/1:1.04	0/0:1.9	0/1:1.02	0/0:1.96	1/1:0.0	0/1:1.04	0/0:2.04	0/1:1.06	0/0:1.96	0/1:0.9	0/1:1.06	0/0:1.76	0/1:1.12	0/0:2.02	0/0:1.92	0/0:2.14	0/1:1.02	0/1:1.04	0/0:1.9	0/1:1.04	0/0:1.94	0/0:1.96	0/1:0.9	0/1:1.04	1/1:0.0	0/0:1.92	0/1:0.92	0/1:0.92	0/0:2.16	0/0:2.12	0/1:0.86	0/0:2.12	0/1:1.06	0/0:2.16	0/0:2.04	0/0:1.96	0/1:1.14	0/0:2.1	0/0:2.16
15	37624001	-0.00743898	-0.00363666	LOC102185258(dist=38155),LOC102183585(dist=4927)	intergenic	15:37624001-37628500	CN0,CN2	0.721207	0/0:2.02	0/0:2.02	0/1:0.92	0/0:1.9	0/1:1.14	0/0:2.1	1/1:0.04	0/1:1.48	0/0:2.3	0/1:1.24	0/0:2.12	0/1:1.12	0/1:1.08	0/2:2.78	0/1:1.26	0/0:1.98	0/0:2.34	0/0:1.8	0/1:1.38	0/1:1.22	0/0:2.14	0/1:1.1	0/0:1.96	0/0:2.04	0/1:1.06	0/1:1.18	1/1:0.04	0/0:2.26	0/1:1.3	0/1:1.1	0/0:2.18	0/0:2.28	0/1:1.06	0/0:2.08	0/1:1.04	0/0:1.94	0/0:1.96	0/0:2.34	0/1:1.16	0/0:1.88	0/0:1.98
15	37677001	0.0259325	0.0149682	LOC102184705(dist=4000),LOC102183054(dist=5496)	intergenic	15:37677001-37682000	CN2,CNH	0.729186	0/0:1.92	0/0:2.16	0/0:1.96	0/0:2.16	0/0:1.94	0/0:1.86	0/0:2.02	0/0:2.16	0/0:2.18	0/0:2.18	0/0:2.24	0/0:2.18	0/0:2.1	0/0:1.78	0/0:2.1	0/0:1.88	0/0:2.02	0/0:2.14	0/0:1.94	0/0:2.04	0/0:1.8	0/0:1.8	0/0:2.14	0/0:1.92	0/0:2.0	0/0:2.2	0/0:2.06	0/0:1.88	0/0:2.04	0/0:1.86	0/0:1.84	0/0:2.18	0/0:1.78	0/0:2.1	0/0:2.2	0/0:1.96	0/0:1.86	0/0:2.1	0/0:2.38	0/0:2.08	0/0:2.12
15	38871001	0.077658	0.0397603	SCUBE2	exonic	15:38871001-38897000	CN2,CNH	0.881092	0/0:1.98	0/0:1.94	0/0:2.2	0/0:2.0	0/0:2.08	0/0:2.02	0/0:1.9	0/0:1.96	0/0:1.92	0/0:2.02	0/0:1.94	0/0:1.84	0/0:1.98	0/0:2.12	0/0:1.86	0/0:2.06	0/0:2.1	0/0:2.04	0/0:2.06	0/0:1.96	0/0:2.02	0/0:1.94	0/0:2.08	0/0:1.94	0/0:1.96	0/0:1.94	0/0:2.06	0/0:2.02	0/0:2.06	0/0:2.12	0/0:2.12	0/0:2.18	0/0:2.06	0/0:2.02	0/0:2.06	0/0:2.06	0/0:1.98	0/0:2.08	0/0:2.08	0/0:2.04	0/0:1.92
15	40245501	0.000234052	0.000763271	RNF141(dist=16836),LYVE1(dist=3930)	intergenic	15:40245501-40248500	CN0	0.751335	0/1:1.18	0/0:2.08	1/1:0.26	0/0:1.96	1/1:0.44	0/0:2.22	0/1:1.02	0/0:2.12	0/0:2.1	1/1:0.14	0/0:1.94	0/0:2.1	0/1:1.1	0/0:1.66	1/1:0.28	0/0:2.2	0/0:2.02	0/1:1.18	0/1:1.12	0/1:1.06	0/0:2.3	0/0:1.98	0/1:1.06	0/0:1.78	0/1:1.46	1/1:0.28	0/1:1.2	0/1:1.22	0/1:1.08	0/0:2.36	0/0:1.88	0/0:1.82	0/0:2.28	0/0:1.86	0/0:1.8	0/0:2.08	0/0:1.82	0/0:2.0	0/0:2.2	0/0:2.06	0/0:1.88
15	40762001	-0.000498662	0.00101573	ZBED5(dist=220302),GALNT18(dist=143503)	intergenic	15:40762001-40766000	CN0	0.771975	0/0:1.86	0/0:2.08	0/0:1.92	0/0:1.98	0/1:1.02	0/0:2.14	0/0:1.92	0/0:2.42	0/0:1.96	0/0:2.08	0/0:2.04	0/0:2.04	0/0:2.06	0/0:1.76	0/0:2.0	0/0:2.2	0/0:1.66	0/0:1.84	0/0:2.18	0/0:1.92	0/0:1.96	0/0:1.96	0/1:1.1	0/0:1.82	0/1:1.02	0/0:1.88	1/1:0.0	0/0:1.72	0/1:0.98	0/0:1.96	0/0:1.9	0/0:1.68	0/0:2.08	0/0:2.16	0/0:2.02	0/0:1.82	0/0:1.86	0/0:2.14	0/0:1.88	0/0:2.2	0/0:1.86
15	62656001	0.0366872	0.000612219	ZC3H12C(dist=466049),C15H11orf87(dist=357827)	intergenic	15:62656001-62660500	CN0	0.651347	0/0:2.1	0/0:2.0	0/0:2.56	0/0:2.16	0/1:0.98	0/1:0.78	0/0:2.4	0/1:0.78	0/0:2.26	0/1:1.14	0/0:2.0	0/0:2.38	0/1:0.98	0/0:2.08	0/1:1.18	0/0:2.04	0/0:2.12	0/1:1.06	0/1:0.64	0/0:2.34	0/0:2.02	0/0:1.84	0/0:2.32	0/0:1.94	0/1:1.12	0/0:2.22	0/1:1.42	0/0:1.94	0/1:1.44	0/1:1.36	0/0:1.84	0/0:1.9	0/0:2.06	0/0:1.56	0/1:1.14	0/0:1.92	0/1:0.98	0/1:1.06	0/0:2.32	1/1:0.04	0/1:0.56
15	63116001	-0.00782648	-0.00372691	C15H11orf87(dist=90108),DDX10(dist=571186)	intergenic	15:63116001-63120000	CN0	0.787034	0/1:0.96	0/0:1.68	0/1:1.22	0/0:1.72	0/0:1.96	0/0:2.28	0/0:1.88	0/0:1.78	0/1:1.12	0/1:0.96	0/1:1.08	0/0:2.04	0/0:2.02	0/0:1.72	0/0:2.24	0/0:2.02	0/1:0.96	0/0:1.72	0/0:2.0	0/0:1.66	0/0:2.06	0/1:0.94	0/1:0.96	0/1:1.14	0/0:2.2	0/0:2.06	0/0:2.08	0/0:2.1	0/0:2.4	0/0:1.94	0/0:1.82	0/1:1.06	0/0:1.88	0/0:2.3	0/0:2.16	0/0:1.84	0/0:2.04	0/1:0.92	0/0:1.74	0/0:1.98	0/0:1.34
15	63737001	0.0329357	0.049569	DDX10	intronic	15:63737001-63741000	CN0,CN2	0.689347	0/0:2.04	0/0:2.16	0/0:2.44	0/0:1.98	0/0:2.18	0/0:1.94	0/0:2.18	0/0:2.3	0/0:2.18	0/0:2.2	0/0:2.36	0/0:2.22	0/0:2.12	0/0:1.64	0/0:2.26	0/0:2.2	0/0:1.94	0/2:2.64	0/0:1.86	0/0:2.08	0/0:2.1	0/0:2.1	0/0:2.08	0/0:2.12	0/0:2.3	0/2:2.64	0/0:2.26	0/0:2.18	0/0:2.34	0/0:2.04	0/0:2.18	0/0:1.86	0/0:1.94	0/1:1.1	0/1:0.94	0/1:1.0	0/1:0.92	0/0:2.0	0/1:0.84	0/1:1.02	0/0:1.84
15	64315501	0.0240154	-0.000303145	C15H11orf65	downstream	15:64315501-64319000	CN0,CN2	0.672904	0/0:1.9	0/0:1.82	0/0:2.72	0/0:1.82	0/0:2.06	0/0:1.9	0/1:1.02	0/0:2.2	0/0:1.6	0/0:1.84	0/0:1.86	0/0:1.82	0/0:1.94	0/0:2.62	0/0:1.9	0/0:2.04	0/0:1.62	0/0:1.9	0/0:2.06	0/0:1.76	0/0:1.76	0/0:2.12	0/0:2.02	0/0:1.7	0/0:1.54	0/0:1.76	0/0:1.62	0/0:2.02	0/0:1.62	0/1:1.12	1/1:0.04	1/1:0.04	1/1:0.02	0/0:1.92	0/0:2.0	0/1:1.26	0/0:1.98	0/1:1.0	0/0:2.1	0/0:2.12	0/2:3.02
15	64477501	0.00081205	-0.00224448	ATM	intronic	15:64477501-64480500	CN0	0.70305	0/0:2.08	0/0:2.22	0/0:2.2	0/0:1.78	0/0:2.32	0/0:2.04	0/1:1.24	0/0:1.84	0/0:1.86	0/0:2.1	0/0:1.88	0/0:1.88	0/1:0.88	0/0:2.06	0/0:2.02	0/1:1.0	0/1:1.2	0/0:2.26	0/0:1.88	0/0:1.84	0/0:2.04	0/0:1.8	0/1:1.04	0/1:0.96	0/0:1.72	0/1:0.82	0/0:1.86	0/1:0.9	0/0:1.7	0/0:2.02	0/0:1.96	0/0:1.9	0/0:2.0	0/0:2.12	0/0:1.9	0/0:2.06	0/0:2.24	0/0:1.78	0/0:2.06	0/0:1.96	0/1:1.26
15	64904001	-0.00419151	-0.00420988	RAB39A(dist=67474),SLC35F2(dist=2043)	intergenic	15:64904001-64908000	CN0,CN2	0.795099	1/1:0.2	0/1:1.3	1/1:0.04	1/1:0.18	0/1:1.26	1/1:0.08	0/1:1.26	1/1:0.14	0/1:1.16	1/1:0.18	1/1:0.18	1/1:0.24	1/1:0.2	0/1:0.92	0/0:2.38	1/1:0.14	0/1:1.34	1/1:0.14	0/0:2.26	0/1:1.22	1/1:0.18	1/1:0.22	1/1:0.22	1/1:0.2	0/1:1.4	1/1:0.06	0/1:1.2	1/1:0.26	0/2:2.58	0/1:1.14	0/0:1.9	0/1:0.98	1/1:0.04	0/1:0.94	1/1:0.06	0/1:1.24	1/1:0.02	0/2:2.74	1/1:0.04	0/1:1.12	0/1:0.92
15	68621001	-0.00756175	0.000718384	JRKL(dist=105019),NONE(dist=NONE)	intergenic	15:68621001-68628500	CN0,CN2	0.769041	0/0:2.02	0/0:2.06	0/1:1.04	0/1:1.16	0/0:2.28	0/0:2.02	0/0:2.3	0/0:1.84	0/0:2.08	1/1:0.06	0/0:2.34	0/0:2.14	0/0:1.98	0/0:2.3	0/1:1.16	0/0:1.98	0/0:1.8	0/0:2.0	0/1:1.1	0/0:2.1	0/0:2.2	0/0:2.16	0/1:1.12	1/1:0.38	0/1:1.16	0/0:2.0	0/0:2.16	0/0:1.88	1/1:0.04	0/0:2.12	1/1:0.02	1/1:0.0	0/0:2.08	1/1:0.02	0/1:1.1	1/1:0.02	1/1:0.04	0/1:0.92	0/0:2.06	0/1:1.1	0/1:1.12
15	68875001	0.0116362	0.0319772	JRKL(dist=359019),NONE(dist=NONE)	intergenic	15:68875001-68878000	CN0,CN2	0.68787	0/0:2.36	0/1:1.0	0/2:2.82	0/0:2.42	0/0:2.26	0/0:2.2	0/0:2.2	0/2:2.94	0/0:2.34	0/0:1.78	0/0:1.64	0/0:2.04	0/0:2.26	0/0:1.9	0/0:2.36	0/1:1.0	0/0:1.36	0/0:2.22	0/0:1.94	0/0:2.42	0/0:2.0	0/0:2.38	0/0:2.1	0/0:1.76	0/0:2.06	0/0:2.38	0/1:1.1	0/0:2.38	0/0:2.32	0/0:1.8	0/1:0.9	0/0:1.6	1/1:0.02	0/1:1.1	0/0:2.22	0/0:1.78	0/1:1.16	0/0:1.78	0/0:2.2	0/0:1.98	0/0:1.42
15	69349001	0.0657736	0.0127247	JRKL(dist=833019),NONE(dist=NONE)	intergenic	15:69349001-69367000	CN0	0.814027	0/0:1.98	0/0:2.02	0/1:1.16	0/1:1.3	0/1:1.1	0/1:1.24	0/0:1.94	0/0:2.1	0/0:1.9	0/0:1.96	0/0:1.86	1/1:0.46	1/1:0.46	0/0:2.26	0/0:2.08	0/0:1.94	0/1:1.24	0/1:1.36	0/1:1.34	0/1:1.38	0/1:1.16	0/1:1.2	0/0:1.96	0/0:1.78	0/1:1.34	0/1:1.3	1/1:0.44	0/1:1.16	0/0:1.92	0/1:1.16	0/0:1.8	0/0:1.84	1/1:0.42	0/0:1.82	0/0:2.06	0/0:1.88	0/0:1.78	0/0:2.04	0/0:1.94	0/0:1.86	0/1:1.22
15	70702501	-0.00593597	-0.00141318	NONE(dist=NONE),LOC102175874(dist=1552027)	intergenic	15:70702501-70709500	CN0	0.82806	0/0:2.1	0/0:2.04	0/0:1.6	0/0:2.08	0/0:1.84	0/0:2.12	0/0:2.02	0/0:2.14	0/0:2.06	0/0:1.72	0/0:2.14	0/0:2.22	0/0:2.06	0/0:2.22	0/0:2.14	0/0:2.02	0/0:2.14	0/0:1.86	0/0:1.96	0/1:1.0	0/0:2.16	0/0:2.08	0/0:2.14	0/0:2.02	0/0:2.26	0/0:1.88	0/0:1.92	0/1:1.12	0/0:2.18	0/0:1.98	0/0:1.84	0/0:2.16	0/0:2.08	0/0:2.06	0/0:2.02	0/0:2.14	0/0:1.88	0/0:2.04	0/0:1.92	0/0:2.0	0/0:1.72
15	70803501	-0.000744175	-0.00166627	NONE(dist=NONE),LOC102175874(dist=1447527)	intergenic	15:70803501-70814000	CN0	0.85638	1/1:0.04	0/1:1.14	0/1:0.92	0/1:1.16	0/1:1.0	0/1:1.06	0/1:1.18	0/0:2.42	1/1:0.02	0/1:1.0	1/1:0.0	0/0:2.28	0/0:2.22	0/1:1.12	0/1:1.2	0/1:0.98	0/1:1.14	0/1:1.0	0/0:2.4	0/1:1.2	0/1:1.1	0/1:1.2	1/1:0.04	0/1:0.18	0/1:1.26	1/1:0.04	1/1:0.0	0/1:0.94	1/1:0.0	0/0:1.74	0/1:1.12	0/0:2.14	0/0:2.12	0/1:1.0	0/1:1.08	0/0:2.02	0/1:1.0	0/0:2.06	0/1:1.06	0/0:1.92	0/1:1.04
15	70816001	-0.000273695	-0.000318605	NONE(dist=NONE),LOC102175874(dist=1443027)	intergenic	15:70816001-70818500	CN0	0.802312	1/1:0.08	0/1:1.04	0/1:1.16	0/1:0.84	0/1:1.06	0/1:1.14	0/1:1.08	0/0:2.54	1/1:0.02	0/1:1.14	1/1:0.0	0/0:1.98	0/0:1.78	0/1:1.12	0/1:0.92	0/1:1.18	0/1:1.26	0/1:1.18	0/0:2.52	0/0:1.52	0/1:1.18	0/1:1.06	1/1:0.06	1/1:0.1	0/1:1.42	1/1:0.1	1/1:0.0	0/1:0.92	1/1:0.0	0/0:1.92	0/1:0.86	0/0:1.84	0/0:2.28	0/1:1.0	0/1:0.82	0/0:1.76	0/1:1.0	0/0:2.14	0/1:1.0	0/0:2.36	0/1:0.82
15	70832501	-0.000470498	0.00179396	NONE(dist=NONE),LOC102175874(dist=1419527)	intergenic	15:70832501-70842000	CN0	0.876836	0/0:1.92	0/1:1.1	0/0:2.34	0/1:0.86	1/1:0.06	0/1:1.06	0/1:0.98	0/0:1.98	0/0:2.06	0/1:0.92	0/0:1.86	1/1:0.08	0/0:2.1	0/1:1.2	0/0:1.96	0/1:0.88	0/1:1.04	0/0:2.0	0/0:1.54	0/1:1.2	0/1:1.1	0/0:1.92	0/1:0.98	0/0:1.82	0/1:1.04	0/1:1.08	0/1:0.96	0/1:0.96	0/0:2.18	0/1:0.84	0/1:1.08	1/1:0.02	0/0:2.0	1/1:0.14	1/1:0.02	1/1:0.02	1/1:0.02	1/1:0.08	0/0:1.98	1/1:0.02	0/1:1.24
15	70938501	-0.0073008	-0.000212115	NONE(dist=NONE),LOC102175874(dist=1317527)	intergenic	15:70938501-70944000	CN0	0.779266	0/0:1.94	0/1:1.0	0/0:2.12	0/0:2.12	0/0:2.08	0/0:1.88	0/1:1.12	0/0:2.26	0/0:2.0	0/0:1.88	0/0:1.9	0/1:1.1	0/0:2.1	0/0:2.22	0/0:2.22	0/1:0.86	0/0:1.82	0/0:1.98	0/0:1.96	0/0:1.98	0/0:2.24	0/0:2.04	0/1:1.08	0/0:1.9	0/0:2.22	0/0:2.28	0/0:2.0	0/0:1.92	0/0:1.92	0/0:1.7	0/0:1.98	0/0:1.98	0/0:1.92	0/0:2.22	0/1:0.92	0/0:1.84	0/0:1.9	0/0:2.22	0/0:1.8	0/0:1.94	0/0:2.44
15	71164001	0.00813235	0.00780448	NONE(dist=NONE),LOC102175874(dist=1090027)	intergenic	15:71164001-71171500	CN0	0.898516	0/1:1.12	0/1:0.98	0/1:1.04	1/1:0.0	1/1:0.02	0/1:0.98	0/1:1.06	0/0:2.34	0/1:0.94	0/1:1.08	0/0:2.26	1/1:0.02	0/0:2.2	0/1:1.2	0/1:1.16	0/1:1.08	0/1:1.18	0/1:1.24	0/0:1.62	0/1:1.06	0/1:1.06	0/0:2.18	0/1:1.08	0/0:1.78	1/1:0.0	1/1:0.04	0/1:1.32	0/1:1.04	0/0:1.86	1/1:0.0	1/1:0.02	1/1:0.04	1/1:0.0	0/1:1.12	0/0:2.16	0/0:2.04	0/0:1.84	0/0:2.0	0/1:0.96	0/0:1.96	0/0:2.06
15	71172001	0.0115875	0.00415676	NONE(dist=NONE),LOC102175874(dist=1087027)	intergenic	15:71172001-71174500	CN0	0.840646	0/1:0.88	0/1:0.98	0/1:0.84	1/1:0.0	1/1:0.02	0/1:1.02	0/1:1.02	0/0:1.9	0/1:0.8	0/1:0.96	0/0:1.9	1/1:0.02	0/0:2.02	0/1:1.48	0/1:1.0	0/1:1.12	0/1:0.88	0/1:0.9	0/0:1.76	0/1:1.14	0/1:0.78	0/0:2.04	0/1:0.96	0/0:1.74	1/1:0.0	1/1:0.0	0/1:1.04	0/1:1.26	0/0:1.7	1/1:0.0	1/1:0.02	1/1:0.02	1/1:0.02	0/1:1.2	0/0:1.9	0/0:1.98	0/0:2.16	0/0:1.76	0/1:0.74	0/0:1.92	0/0:1.94
15	71179501	0.00952045	0.00366471	NONE(dist=NONE),LOC102175874(dist=1078527)	intergenic	15:71179501-71183000	CN0,CN2	0.732859	0/1:1.12	0/1:0.94	0/1:0.92	0/0:2.4	0/0:2.0	0/1:0.86	0/1:0.96	1/1:0.06	0/1:0.94	0/1:1.16	1/1:0.04	0/0:1.92	1/1:0.06	0/1:1.22	0/1:1.0	0/1:1.12	0/1:1.18	0/1:1.06	1/1:0.08	0/1:1.16	0/1:1.02	1/1:0.1	0/1:1.12	1/1:0.12	0/0:1.86	0/0:1.84	0/1:1.36	0/1:1.22	1/1:0.04	0/0:1.6	0/0:1.54	0/0:1.52	0/0:1.9	0/1:1.14	1/1:0.0	1/1:0.12	1/1:0.04	1/1:0.02	0/1:0.96	1/1:0.04	1/1:0.06
15	71228001	0.0284643	0.0338734	NONE(dist=NONE),LOC102175874(dist=1028527)	intergenic	15:71228001-71233000	CN0	0.762799	0/0:2.0	0/0:1.92	0/0:2.1	0/0:2.4	0/0:2.14	0/0:1.86	0/0:2.26	0/1:1.14	0/0:2.04	0/0:1.84	0/0:2.24	0/0:2.28	0/0:2.26	0/0:1.78	0/0:2.28	0/0:1.88	0/0:2.08	0/0:2.06	0/0:2.16	0/0:2.4	0/0:2.52	0/0:2.22	0/0:2.08	0/0:2.02	0/0:2.44	0/0:2.32	0/0:2.18	0/0:1.54	0/0:2.2	0/0:1.8	0/1:1.06	0/0:1.98	0/0:2.14	0/0:2.04	0/0:2.22	0/0:2.14	0/0:1.82	0/0:2.0	0/0:1.6	0/0:2.0	0/0:1.74
15	72152501	-0.0041068	0.00376911	NONE(dist=NONE),LOC102175874(dist=100527)	intergenic	15:72152501-72161000	CN0	0.83555	0/0:2.02	0/0:2.12	0/1:1.26	0/0:1.96	0/0:1.96	0/0:2.0	0/1:0.96	0/0:2.4	0/0:1.88	0/0:2.02	0/0:2.14	0/0:1.9	0/0:1.94	0/0:2.16	0/0:2.02	0/0:1.9	0/0:2.0	0/0:2.1	0/0:1.86	0/0:2.12	0/0:2.1	0/0:2.16	0/0:2.06	0/0:2.14	0/0:2.28	0/0:2.34	0/0:2.14	0/0:1.96	0/0:2.02	0/0:1.86	0/0:2.1	1/1:0.0	1/1:0.0	0/0:1.92	0/0:2.04	0/0:2.12	0/0:2.14	0/0:2.08	0/0:1.96	0/0:2.06	0/0:2.32
15	73238001	0.0212316	0.0066197	LOC108637685	intronic	15:73238001-73240500	CN0,CN2	0.693837	0/0:2.38	0/1:1.0	0/1:1.2	0/1:1.22	0/1:1.42	0/1:1.3	0/1:1.36	0/1:0.62	0/0:2.22	0/0:1.66	0/0:1.88	1/1:0.3	1/1:0.3	0/0:1.54	0/1:1.4	0/1:1.0	0/0:2.0	0/0:1.54	1/1:0.34	0/1:1.48	0/1:1.04	0/1:1.26	0/0:2.12	0/0:2.18	0/1:1.4	0/0:2.08	0/0:2.12	0/0:1.58	0/0:2.38	1/1:0.02	0/1:1.18	1/1:0.42	1/1:0.08	0/1:1.44	0/1:1.2	1/1:0.3	0/1:1.36	1/1:0.14	0/1:1.12	1/1:0.34	0/1:1.24
15	73242001	0.00574216	0.00533439	LOC108637685	intronic	15:73242001-73248000	CN0	0.851041	0/0:2.1	0/1:1.14	0/1:0.88	0/1:1.12	0/1:1.2	0/1:1.18	0/1:1.26	1/1:0.1	0/0:2.26	0/1:0.96	0/0:1.9	1/1:0.14	1/1:0.08	0/1:1.3	0/1:1.2	0/1:1.28	0/1:0.86	0/1:1.0	1/1:0.04	0/0:1.4	0/1:1.22	0/1:1.18	0/0:2.3	0/0:2.0	0/1:1.06	0/0:2.48	0/0:2.18	0/1:1.24	0/0:2.1	1/1:0.04	0/1:1.14	1/1:0.0	1/1:0.04	0/1:1.02	0/1:1.22	1/1:0.04	0/1:0.96	1/1:0.04	0/1:1.06	1/1:0.02	0/1:1.04
15	73682501	-0.00854522	-0.000349143	LOC102176145(dist=11271),ARHGAP42(dist=424818)	intergenic	15:73682501-73685000	CN0,CN2,CNH	0.659321	0/0:2.18	0/0:1.92	0/0:2.1	0/0:2.32	0/0:1.96	0/0:1.96	0/0:2.5	0/0:1.98	0/0:2.0	0/0:2.08	0/0:1.9	0/0:2.28	0/0:2.1	0/0:1.86	0/0:2.28	0/0:2.06	0/0:2.48	0/0:2.5	0/0:2.14	0/2:2.68	0/0:2.4	0/0:2.16	0/0:2.12	0/0:2.12	0/2:3.04	0/0:1.96	0/2:2.62	0/0:2.04	0/0:2.26	0/0:1.8	0/0:1.92	0/0:2.46	0/0:1.78	0/0:2.2	0/0:1.86	0/0:2.18	0/0:2.2	0/0:1.8	0/0:2.22	0/0:1.9	2/2:4.06
15	73906501	0.0499088	0.0244788	LOC102176145(dist=235271),ARHGAP42(dist=198818)	intergenic	15:73906501-73911000	CN0	0.879084	0/1:1.14	0/1:0.84	0/0:2.28	0/1:1.0	0/1:1.3	0/1:0.96	1/1:0.12	1/1:0.08	1/1:0.06	1/1:0.12	1/1:0.0	0/1:1.0	1/1:0.08	1/1:0.0	1/1:0.2	1/1:0.08	1/1:0.14	1/1:0.08	0/1:1.08	1/1:0.14	1/1:0.04	1/1:0.12	1/1:0.12	1/1:0.08	1/1:0.14	0/1:1.18	1/1:0.06	0/1:1.1	1/1:0.06	1/1:0.12	1/1:0.04	0/0:1.82	0/0:1.9	0/1:0.86	0/1:1.16	0/0:1.94	0/0:1.78	0/0:2.06	0/0:1.88	0/0:2.1	0/1:1.0
15	73975001	-0.00643694	-0.00208622	LOC102176145(dist=303771),ARHGAP42(dist=132318)	intergenic	15:73975001-73977500	CN0	0.652629	0/0:1.88	0/0:1.6	1/1:0.2	0/0:1.62	0/0:1.78	0/0:1.94	0/1:0.96	0/1:0.92	0/1:0.76	0/1:1.52	0/0:2.48	0/1:1.1	0/0:1.8	0/0:2.7	0/1:1.1	0/0:1.68	0/0:1.96	0/0:2.06	0/1:0.88	0/0:1.8	0/0:1.72	0/1:1.08	0/0:1.96	0/0:1.86	0/0:2.0	0/0:2.02	0/0:1.82	0/0:1.84	0/0:2.16	0/1:1.12	0/0:1.7	0/0:2.08	0/0:1.7	0/0:2.06	0/0:1.86	0/1:0.9	0/0:1.6	0/1:1.14	0/0:2.04	0/0:1.84	0/1:0.8
15	78706501	-4.95272e-05	0.00363392	PDGFD(dist=520176),LOC102191717(dist=495340)	intergenic	15:78706501-78709000	CN0,CN2	0.65093	0/0:2.1	0/0:1.86	0/0:2.28	0/1:1.12	0/0:2.1	0/0:2.38	0/1:1.26	0/0:2.28	0/0:2.16	0/0:2.38	0/2:2.76	0/0:2.12	0/0:2.06	0/2:2.66	0/0:2.08	0/0:2.04	0/0:1.78	0/1:0.94	0/2:2.68	0/0:2.32	0/0:2.4	0/1:0.9	0/0:2.04	0/0:2.02	0/0:2.3	0/0:1.92	0/0:2.08	0/0:2.08	0/1:1.04	0/0:2.0	0/0:1.96	0/0:1.7	0/0:1.96	0/0:1.8	0/0:2.36	0/0:1.98	0/0:1.88	0/0:2.06	1/1:0.0	0/0:2.04	0/0:2.3
15	78978501	0.0354227	0.0346241	PDGFD(dist=792176),LOC102191717(dist=219340)	intergenic	15:78978501-78985000	CN0	0.808644	0/0:2.22	0/0:1.88	0/1:1.34	0/0:2.04	0/0:2.38	0/0:2.1	0/0:2.28	0/0:2.2	0/0:2.1	0/0:2.08	0/0:2.22	0/0:2.08	0/0:2.08	0/0:1.92	0/0:2.36	0/0:1.94	0/0:2.38	0/0:2.36	0/0:2.4	0/1:1.0	0/0:2.2	0/0:2.06	0/0:2.16	0/1:1.1	0/0:2.18	0/0:2.14	0/0:2.0	0/1:1.0	0/0:2.12	0/0:1.76	0/0:2.1	0/0:1.96	1/1:0.02	0/0:2.06	0/1:0.98	0/1:1.12	0/1:1.12	0/1:1.14	0/0:2.14	1/1:0.02	0/1:1.02
15	79790501	0.00665374	0.00504467	LOC102191717(dist=551056),GRIA4(dist=172814)	intergenic	15:79790501-79801000	CN0	0.8569	0/0:2.1	0/0:2.04	0/0:2.3	0/0:1.96	0/1:1.06	0/0:1.96	0/0:2.04	0/0:2.46	0/0:2.14	0/0:1.84	0/0:1.98	0/0:2.0	0/0:2.08	0/0:2.2	0/0:2.14	0/1:1.06	0/0:1.92	0/0:2.18	0/0:1.92	0/0:2.14	0/0:2.1	0/0:2.0	0/1:0.98	0/0:1.96	0/0:1.82	0/0:2.0	0/0:1.96	0/0:2.2	0/0:2.12	0/1:0.96	0/0:2.14	0/0:2.02	0/0:2.1	0/0:1.94	0/0:2.02	0/0:2.16	0/0:2.2	0/0:2.06	0/0:1.9	0/0:2.0	0/1:1.18
16	5093501	0.0284472	0.0206401	CFH,LOC102184713,LOC108637766	exonic	16:5093501-5310000	CN2,CNH	0.671504	0/0:2.2	0/0:2.28	0/0:2.14	1/1:4.26	0/0:2.34	0/0:2.28	0/1:3.3	0/1:3.26	0/1:3.12	0/1:3.22	2/2:5.7	0/1:3.16	1/1:3.9	0/1:2.82	0/1:2.46	0/1:3.06	1/1:4.18	1/1:4.02	1/1:4.3	0/1:3.26	0/1:3.32	0/1:3.24	0/0:2.3	0/0:2.32	1/1:4.18	1/1:3.96	0/1:3.26	0/0:2.24	0/1:3.22	0/1:2.96	1/1:3.84	0/1:3.2	0/0:2.2	1/1:3.82	0/1:3.2	0/0:2.22	0/0:2.18	0/0:2.22	0/1:2.74	0/1:3.2	0/0:2.3
16	6239001	-0.00204102	0.0057195	LOC102189420(dist=23558),TRNAW-CCA(dist=793618)	intergenic	16:6239001-6244000	CN0,CN2	0.72387	0/2:2.88	0/2:3.04	0/0:1.42	0/0:2.22	0/2:2.9	0/0:1.92	0/2:2.9	0/0:2.08	0/0:2.02	0/2:2.8	0/0:2.12	0/0:1.98	0/1:1.1	0/0:2.14	0/1:1.14	0/0:2.08	0/2:2.84	2/2:3.78	0/0:1.7	0/2:2.76	0/2:2.74	0/1:0.98	0/0:2.08	0/0:1.88	0/0:1.8	0/0:1.92	0/2:2.56	0/0:2.02	0/2:2.76	0/1:1.0	0/0:1.56	0/0:1.92	0/0:1.98	0/0:1.9	0/0:2.04	0/2:2.68	0/0:2.3	0/2:2.8	0/1:0.96	0/2:2.64	0/0:1.66
16	6245001	0.0221052	0.0186093	LOC102189420(dist=29558),TRNAW-CCA(dist=786118)	intergenic	16:6245001-6251500	CN2	0.738965	0/1:3.0	0/1:2.84	0/1:2.64	0/1:2.58	0/1:2.78	0/1:2.66	0/1:3.04	0/0:2.2	0/0:2.12	0/1:2.82	0/0:2.08	0/0:1.9	0/0:2.14	0/1:3.18	0/0:2.04	0/0:1.98	0/0:2.48	1/1:3.8	0/1:2.68	0/1:2.94	0/1:2.82	0/0:2.02	0/0:2.16	0/0:2.08	0/0:2.02	0/0:2.16	0/1:2.92	0/0:2.1	0/1:2.96	0/0:2.16	0/1:2.74	0/0:1.74	0/0:1.78	0/0:1.98	0/0:2.08	0/1:2.66	0/0:1.88	0/1:2.96	0/0:2.1	0/1:2.78	0/1:3.42
16	6720001	0.0391637	0.0114392	LOC102189420(dist=504558),TRNAW-CCA(dist=311118)	intergenic	16:6720001-6726500	CN0	0.813545	0/1:1.04	0/0:2.06	0/0:2.12	0/1:1.08	0/0:2.04	0/1:1.18	0/1:0.9	0/0:2.52	0/0:2.12	0/1:1.22	0/1:1.1	0/0:2.06	0/1:1.06	0/1:1.06	0/1:1.2	0/0:1.86	1/1:0.0	0/1:0.96	0/1:0.88	0/1:1.36	0/1:1.06	0/1:1.22	0/0:2.16	0/1:1.04	0/1:1.34	0/1:1.06	0/1:1.02	0/0:2.02	0/1:0.94	0/0:2.0	0/0:1.94	0/0:1.82	0/0:2.12	0/0:1.88	0/0:2.06	0/0:2.06	0/0:2.04	0/0:2.12	0/0:1.94	0/0:1.98	0/0:1.7
16	6931001	0.00253666	0.00535701	LOC102189420(dist=715558),TRNAW-CCA(dist=94118)	intergenic	16:6931001-6943500	CN0	0.87983	0/1:1.06	0/0:1.96	0/1:1.14	0/0:2.1	0/0:1.8	0/0:2.06	0/0:2.18	0/0:1.84	0/1:0.96	0/0:1.92	0/0:2.14	0/1:1.02	0/0:1.92	0/0:2.1	0/0:1.98	0/1:1.04	0/0:2.14	0/0:1.82	0/0:1.76	0/0:2.02	0/0:2.14	0/0:2.06	0/0:2.02	0/0:1.82	0/0:2.1	0/0:2.14	0/0:1.92	0/0:2.02	0/0:2.12	0/0:1.84	0/1:1.0	0/1:1.02	0/0:2.02	0/1:1.02	0/1:1.0	0/1:0.96	0/1:1.08	0/1:1.0	1/1:0.0	0/1:1.0	0/0:2.1
16	7125501	0.00796431	0.013072	TRNAW-CCA(dist=87812),TRNAK-UUU(dist=1203794)	intergenic	16:7125501-7131500	CN0	0.802066	0/0:1.98	0/0:1.9	0/0:1.92	0/0:1.86	0/0:1.98	0/0:2.24	0/0:2.04	0/0:2.32	0/0:1.94	0/0:1.94	0/0:2.06	0/0:2.02	0/0:2.0	0/0:2.08	0/0:1.96	0/0:2.14	0/0:1.78	0/0:1.94	0/0:1.82	0/0:2.0	0/0:1.96	0/0:2.08	0/0:2.06	0/0:1.86	0/0:2.24	0/0:2.36	0/1:1.48	0/0:1.8	0/0:2.0	0/0:1.98	0/0:2.08	0/0:1.7	0/0:1.96	0/0:1.92	0/0:1.98	0/0:1.9	0/1:1.14	0/0:1.96	0/0:1.8	0/0:2.08	0/0:2.28
16	7224501	0.00207157	0.00442908	TRNAW-CCA(dist=186812),TRNAK-UUU(dist=1105794)	intergenic	16:7224501-7229500	CN0	0.74406	0/0:2.12	0/0:2.08	0/0:1.72	0/0:2.14	0/0:2.02	0/0:1.84	0/0:2.14	0/0:2.14	0/0:2.02	0/0:2.06	0/0:2.06	0/0:1.92	0/1:0.96	0/0:2.1	0/0:2.14	0/0:2.24	0/0:1.84	0/0:2.16	0/1:1.24	0/0:2.22	0/0:2.08	0/0:1.94	0/0:2.08	0/0:1.88	0/0:2.02	0/0:1.94	0/1:1.48	0/0:2.08	0/0:1.7	0/0:1.84	0/0:1.98	0/0:1.7	0/0:1.9	0/0:1.88	0/0:2.2	0/0:1.88	0/0:1.92	0/0:1.96	0/0:2.32	0/0:1.68	0/0:1.98
16	9004501	0.0648827	0.0274781	TRNAK-UUU(dist=669135),CDC73(dist=1614917)	intergenic	16:9004501-9009000	CN0	0.85283	0/1:1.04	0/1:1.18	0/0:1.84	0/0:1.86	0/0:1.96	0/0:2.38	0/1:0.94	0/1:0.96	0/0:1.88	0/0:2.18	0/0:1.74	0/0:1.88	0/1:0.98	0/0:2.32	0/0:2.14	0/1:0.94	0/1:0.82	0/0:2.16	0/0:2.02	0/1:1.06	0/0:2.26	0/0:1.82	0/1:0.94	0/1:0.92	0/1:1.1	0/1:1.1	0/1:0.96	0/1:0.84	0/0:2.1	1/1:0.0	1/1:0.0	1/1:0.0	0/0:1.96	1/1:0.0	0/1:1.08	1/1:0.0	1/1:0.0	1/1:0.0	1/1:0.0	1/1:0.0	1/1:0.0
16	9148501	-0.00373363	-0.00447606	TRNAK-UUU(dist=813135),CDC73(dist=1471917)	intergenic	16:9148501-9152000	CN0	0.722095	0/0:2.04	0/0:2.42	1/1:0.38	0/0:2.0	0/0:2.18	0/1:1.5	0/0:2.22	1/1:0.36	0/0:2.38	0/0:1.58	0/1:1.4	1/1:0.38	1/1:0.38	0/0:1.64	1/1:0.38	0/0:2.14	0/0:2.34	0/0:2.32	0/0:2.2	0/1:1.48	0/0:2.42	0/0:2.28	0/1:1.4	0/1:0.7	0/0:1.64	0/0:1.68	0/1:1.26	0/0:2.54	0/0:1.62	0/0:1.84	0/0:2.04	0/0:2.14	1/1:0.4	0/1:1.16	0/1:1.36	0/1:1.26	0/1:1.3	0/1:1.28	0/1:1.24	0/1:1.28	0/0:1.92
16	9209501	0.00846829	-0.000104797	TRNAK-UUU(dist=874135),CDC73(dist=1409417)	intergenic	16:9209501-9214500	CN0	0.810629	0/1:1.18	0/0:2.02	0/0:2.3	0/1:1.04	0/1:0.9	0/0:2.2	0/1:1.04	0/0:2.1	0/0:1.94	0/1:1.04	0/0:1.96	0/0:2.06	0/0:1.96	0/1:1.28	0/0:2.0	0/0:2.0	0/0:1.68	0/0:1.82	0/0:1.58	0/0:1.88	0/1:1.12	0/0:2.08	0/1:1.0	0/1:1.26	0/1:1.22	0/0:2.26	0/1:1.08	0/0:2.02	0/0:2.02	0/0:1.84	0/1:1.14	0/0:2.02	0/0:2.02	0/0:1.94	0/0:2.34	0/0:2.1	0/0:2.02	0/0:2.1	0/0:1.94	0/0:2.08	0/0:1.62
16	10376501	0.0101611	0.00870926	NONE(dist=NONE),CDC73(dist=244417)	intergenic	16:10376501-10379500	CN0	0.871604	0/1:1.2	0/1:0.96	1/1:0.08	0/1:1.36	0/0:1.98	0/1:1.32	0/0:2.08	0/1:1.2	0/0:1.94	0/1:1.04	0/1:0.98	0/1:1.1	0/0:1.9	0/1:1.28	1/1:0.0	0/0:2.02	1/1:0.0	0/0:2.34	1/1:0.08	1/1:0.0	0/0:2.24	1/1:0.0	0/0:1.84	1/1:0.36	0/0:1.74	0/1:1.1	0/1:1.18	1/1:0.0	0/1:0.96	0/0:1.9	1/1:0.02	0/0:1.98	0/0:1.58	0/1:1.14	0/0:2.16	0/0:2.04	0/0:1.94	0/0:1.78	1/1:0.0	0/0:1.78	0/1:1.02
16	10483001	0.0425127	-0.00792089	NONE(dist=NONE),CDC73(dist=137917)	intergenic	16:10483001-10486000	CN0,CN2	0.670022	0/0:2.28	0/0:2.22	0/0:1.92	0/0:2.28	0/0:2.36	0/1:0.76	0/0:2.04	0/0:2.62	1/1:0.08	0/0:2.36	0/0:2.56	0/0:2.2	0/1:1.06	0/0:2.24	0/0:2.4	0/1:1.12	0/0:2.08	0/1:1.24	0/0:2.24	0/0:2.34	0/0:1.82	0/0:2.18	0/1:1.2	0/0:2.04	0/0:2.26	0/0:2.54	0/2:3.06	0/1:1.16	0/0:2.22	0/0:1.92	0/0:1.62	0/0:2.04	0/0:2.12	0/0:2.26	0/0:1.94	0/0:1.82	0/0:2.06	0/0:2.62	0/0:1.76	0/0:1.94	0/0:2.02
16	11894001	-0.00769384	0.00238983	LOC108637735	intronic	16:11894001-11898000	CN2	0.697773	0/0:2.18	0/0:2.34	0/0:2.48	0/0:2.24	0/0:2.32	0/0:1.96	0/0:2.26	0/0:2.54	0/0:2.26	0/0:2.2	0/0:2.08	0/0:2.0	0/1:3.32	0/0:2.36	0/0:2.36	0/0:2.08	0/0:2.34	0/0:2.22	0/0:1.76	0/0:2.32	0/0:2.08	0/1:2.8	0/0:2.24	0/0:2.06	0/0:2.32	0/0:2.6	0/0:2.28	0/1:3.32	0/0:1.96	0/0:2.06	0/0:1.82	0/0:2.1	0/0:2.08	0/0:2.0	0/0:2.02	0/0:1.94	0/0:2.04	0/0:2.14	0/0:2.14	0/0:2.04	0/0:1.94
16	13104501	0.00286891	0.00504012	TRNAS-GGA(dist=217574),LOC102171266(dist=568946)	intergenic	16:13104501-13107500	CN0,CN2	0.825634	0/1:1.0	1/1:0.08	0/1:1.24	1/1:0.1	0/1:1.02	1/1:0.06	0/0:1.78	0/1:1.18	1/1:0.06	0/1:0.78	1/1:0.04	0/1:1.18	1/1:0.08	0/2:2.7	0/1:0.96	0/1:0.94	1/1:0.0	1/1:0.0	0/1:0.82	1/1:0.24	1/1:0.12	0/1:1.0	1/1:0.12	0/1:1.14	1/1:0.08	0/1:1.36	0/1:1.06	0/1:0.84	0/1:0.9	1/1:0.16	1/1:0.36	1/1:0.1	1/1:0.2	0/1:0.7	1/1:0.06	1/1:0.1	0/1:0.96	1/1:0.14	0/1:1.5	0/1:0.92	1/1:0.3
16	18577501	0.00206438	0.00158005	ESRRG	intronic	16:18577501-18579500	CN0	0.804384	1/1:0.32	1/1:0.24	1/1:0.3	1/1:0.4	0/1:1.14	1/1:0.52	1/1:0.24	1/1:0.4	1/1:0.24	1/1:0.3	1/1:0.22	1/1:0.32	0/1:1.24	1/1:0.46	0/1:0.96	1/1:0.26	1/1:0.46	1/1:0.32	0/1:1.08	0/1:0.72	1/1:0.18	1/1:0.34	1/1:0.44	0/1:0.88	1/1:0.16	1/1:0.4	0/1:0.7	1/1:0.14	0/1:1.1	1/1:0.26	1/1:0.16	1/1:0.26	1/1:0.26	0/1:0.68	1/1:0.32	1/1:0.28	1/1:0.22	1/1:0.34	1/1:0.12	1/1:0.34	1/1:0.26
16	20842001	0.0324522	0.0259101	TGFB2(dist=402430),LYPLAL1(dist=334696)	intergenic	16:20842001-20848000	CN0,CN2	0.676803	0/0:2.28	0/0:2.04	0/0:2.0	0/0:2.38	0/0:2.18	0/0:2.22	0/0:2.34	0/1:1.12	0/0:2.18	0/0:2.0	0/0:2.38	0/0:2.24	0/0:2.2	0/0:1.8	0/0:2.56	0/0:2.32	0/0:2.1	0/0:2.26	0/0:1.78	0/0:2.36	0/0:2.06	0/0:2.26	0/0:2.18	0/0:1.98	0/0:2.0	0/0:2.34	0/0:2.0	0/0:2.26	0/0:2.04	0/0:2.12	0/1:0.9	0/0:1.9	0/0:2.3	0/0:2.08	0/0:2.22	0/1:1.14	0/1:1.08	0/1:1.16	0/0:1.82	0/0:1.84	0/0:1.68
16	21103501	-0.00519098	-0.00191298	TGFB2(dist=663930),LYPLAL1(dist=76696)	intergenic	16:21103501-21106000	CN2	0.652748	0/0:2.04	0/0:2.08	0/0:2.16	0/0:1.96	0/0:2.24	0/0:2.36	0/0:2.16	0/0:2.18	0/0:1.94	0/0:1.68	0/0:2.46	0/0:1.94	0/0:2.28	0/0:1.84	0/0:2.02	0/0:2.06	0/0:2.2	0/0:2.36	0/0:1.64	0/0:2.26	0/0:1.86	0/0:2.16	0/0:2.08	0/0:1.94	0/0:2.02	0/1:2.82	0/1:2.92	0/1:2.56	0/0:2.1	0/0:2.06	0/0:1.88	0/0:1.86	0/1:2.54	0/0:2.0	0/0:2.38	0/0:2.1	0/0:2.1	0/0:2.06	0/0:2.14	0/0:2.08	1/1:3.88
16	26674001	-0.00897766	-0.00473412	DNAH14	intronic	16:26674001-26676500	CN2,CNH	0.659607	0/0:2.32	0/0:2.12	0/0:2.16	0/0:2.4	0/0:2.52	1/1:3.62	0/0:2.18	0/0:2.26	0/0:2.38	0/0:2.2	0/0:2.52	0/0:1.7	0/0:2.06	0/0:1.46	1/2:4.58	0/0:2.08	0/0:2.18	0/0:2.2	0/0:1.6	0/0:2.2	0/0:1.74	0/0:2.22	0/1:3.26	0/0:2.04	0/0:2.18	0/0:2.46	0/0:2.22	0/0:2.22	0/0:2.38	0/0:2.24	0/0:2.08	0/1:2.68	0/1:3.1	0/0:2.06	0/0:2.06	0/1:3.08	0/1:2.72	1/1:3.46	0/0:2.08	0/0:2.18	0/1:3.3
16	27592001	0.0332674	0.06252	SDE2(dist=10326),TRNAY-GUA(dist=19831)	intergenic	16:27592001-27595500	CN0	0.727726	0/0:2.06	0/0:2.04	0/0:2.64	0/0:2.34	0/0:2.22	0/0:2.04	0/0:2.08	0/0:2.16	0/0:2.32	0/0:1.86	0/0:2.44	0/0:2.02	0/0:2.08	0/0:2.5	0/0:2.28	0/0:2.32	0/0:2.2	0/0:2.04	0/0:2.04	0/0:2.04	0/0:2.16	0/0:2.0	0/0:2.02	0/0:1.96	0/0:2.48	0/0:1.96	0/0:2.1	0/0:2.1	0/0:2.3	0/0:2.64	0/0:2.12	0/0:1.9	0/0:2.16	0/0:1.98	0/0:1.98	0/0:1.84	0/0:2.14	0/0:1.86	0/0:2.08	0/0:2.32	0/0:2.36
16	32377501	0.00541925	-0.00535498	SDCCAG8	intronic	16:32377501-32380000	CN2	0.658952	0/0:2.22	0/0:2.02	0/0:1.92	0/0:2.32	0/0:2.0	0/0:2.2	0/0:2.04	0/0:2.16	0/0:2.2	0/0:2.16	0/0:2.24	0/0:2.24	0/0:1.88	1/1:3.9	0/0:1.8	0/0:2.14	0/0:2.18	0/1:3.1	0/0:2.38	0/1:2.82	0/0:2.26	0/0:1.74	0/0:2.0	0/0:2.16	0/1:2.72	0/1:2.76	0/0:1.66	0/0:2.22	0/0:1.94	0/0:2.16	0/0:2.24	0/0:2.58	0/0:2.02	0/0:2.44	0/0:1.74	0/0:2.2	0/0:2.22	0/0:1.92	0/0:2.2	0/0:2.38	1/1:3.66
16	36487501	-0.00296986	-0.00398466	LOC108637754(dist=95383),GORAB(dist=142846)	intergenic	16:36487501-36490500	CN2	0.677032	0/1:2.62	0/0:1.82	0/0:2.48	0/0:2.02	0/0:2.1	0/0:2.26	0/1:3.0	0/0:1.78	0/1:2.8	0/1:2.74	0/0:2.26	0/0:1.94	0/0:1.94	0/0:1.62	0/1:2.98	0/0:1.86	0/1:2.96	0/1:3.06	0/0:2.08	0/0:2.06	0/0:2.04	0/0:2.0	0/1:2.7	0/0:1.96	1/1:3.56	0/0:2.06	0/0:1.58	0/0:2.24	0/1:2.54	0/0:2.3	0/0:1.84	0/1:2.5	0/1:3.22	0/0:2.04	0/0:2.02	0/1:2.72	0/0:1.94	0/0:2.06	0/0:2.14	0/1:3.04	0/1:2.76
16	37351501	0.0111585	0.000713344	FMO1	intronic	16:37351501-37354000	CN0,CN2	0.665367	0/0:2.1	0/0:1.96	0/1:1.38	0/0:2.38	0/0:2.1	0/0:1.8	0/0:1.84	0/0:2.2	0/0:1.62	0/0:1.94	0/0:1.9	0/1:0.96	0/0:1.94	0/2:2.72	0/0:1.76	0/1:1.0	0/0:2.0	0/0:1.7	0/0:2.52	0/0:2.04	0/0:1.96	0/0:2.26	0/1:1.14	0/0:1.9	0/0:1.64	0/0:2.18	0/0:2.06	0/0:2.0	0/0:1.88	0/0:1.86	0/0:1.92	0/0:2.12	0/0:1.84	0/0:2.36	0/0:2.08	0/0:1.76	0/0:2.24	0/0:1.98	0/0:2.02	0/0:1.9	0/0:2.06
16	37962001	0.0125791	0.00413872	DNM3	intronic	16:37962001-37967000	CN0	0.863557	0/1:0.96	0/0:1.92	0/1:1.22	0/1:1.22	1/1:0.0	1/1:0.0	0/1:1.18	0/1:1.28	0/0:2.02	0/0:2.1	0/0:2.12	1/1:0.0	0/1:0.96	1/1:0.0	0/1:1.3	1/1:0.02	0/1:1.14	0/1:1.36	0/1:1.28	0/1:0.96	0/1:0.96	0/1:1.14	1/1:0.0	0/1:0.9	0/1:1.04	0/1:1.16	1/1:0.0	0/1:1.0	0/1:1.14	1/1:0.04	0/1:1.06	0/1:0.94	1/1:0.0	1/1:0.02	0/1:1.04	0/0:2.06	0/0:1.94	0/0:2.22	0/0:1.82	0/1:1.02	0/1:1.18
16	42848501	-0.00239865	-0.00278242	GPR157,LOC102178379,LOC106501911	exonic	16:42848501-42986000	CN2,CNH	0.775055	1/1:4.26	0/1:3.52	0/1:3.14	1/2:5.0	0/1:3.4	1/2:5.2	0/1:3.46	1/1:4.28	1/2:5.24	0/1:3.3	1/1:4.38	0/1:3.26	0/1:3.44	1/1:4.42	1/1:4.62	0/1:3.52	1/1:4.24	0/1:3.22	0/1:3.28	0/0:2.48	1/2:4.86	0/1:3.32	1/2:5.12	0/1:3.44	0/1:3.4	0/1:3.36	0/1:3.34	0/1:3.3	0/1:3.56	0/1:3.34	0/1:3.24	0/1:3.18	0/1:3.64	0/1:3.12	0/1:3.6	0/1:3.4	0/1:3.32	0/1:3.44	1/1:4.52	0/1:3.32	1/1:4.18
16	44394001	0.0222565	0.00343786	CAMTA1	intronic	16:44394001-44398000	CN0	0.688637	0/0:1.62	0/0:1.64	0/0:1.82	0/0:2.02	0/0:1.7	0/0:2.14	0/0:1.84	0/0:1.82	0/0:1.82	0/1:1.4	0/0:1.66	0/0:1.8	0/0:1.68	0/0:2.16	0/0:1.76	0/0:1.88	0/0:1.86	0/0:2.32	0/0:1.88	0/0:1.8	0/0:1.72	0/0:1.82	0/0:2.0	0/0:1.66	0/0:2.28	0/0:1.74	0/0:2.04	0/0:1.76	0/0:2.04	0/0:1.8	0/0:1.96	0/0:1.7	0/1:1.5	0/0:2.0	0/0:2.04	0/0:2.0	0/0:2.18	0/0:2.08	0/0:2.32	0/0:1.88	0/0:1.92
16	52042501	0.21961	0.0605252	KAZN(dist=650425),PRDM2(dist=213196)	intergenic	16:52042501-52048000	CN2	0.743567	0/0:1.98	0/0:2.14	0/0:2.14	0/1:2.64	0/0:2.12	0/1:2.96	0/0:2.12	0/1:2.62	0/0:2.08	0/0:2.42	0/0:2.44	0/0:2.14	0/0:2.04	0/0:2.32	1/1:3.72	0/0:2.06	0/0:2.34	0/1:2.76	1/1:3.96	0/0:2.08	0/0:2.04	0/0:2.04	0/0:2.1	0/0:1.9	0/1:3.14	1/1:3.64	0/0:1.98	0/0:2.18	0/1:3.34	0/0:1.88	0/0:1.92	0/0:1.94	0/0:2.16	0/0:2.24	0/0:2.12	0/0:2.04	0/0:1.94	0/0:2.36	0/0:2.06	0/0:2.32	0/0:2.18
16	52819501	0.00765676	0.0109967	LOC102177360(dist=15516),LOC108637745(dist=54320)	intergenic	16:52819501-52823500	CN0,CN2	0.657333	0/0:2.12	0/0:1.72	0/2:2.78	0/0:1.86	0/0:2.06	0/2:2.68	0/0:2.16	0/2:2.56	0/1:1.1	0/0:2.1	0/0:1.8	0/0:1.72	0/0:2.06	0/0:2.2	0/0:2.02	0/1:1.1	0/0:2.08	0/0:1.8	0/0:1.94	0/0:2.4	0/0:2.04	0/0:2.2	0/0:1.96	0/0:2.18	0/0:1.94	0/0:2.2	0/0:2.28	0/0:1.96	0/0:2.34	0/0:2.02	0/0:2.28	0/1:0.88	0/0:2.16	1/1:0.1	0/0:2.12	0/0:1.88	0/0:1.74	0/0:2.1	0/0:1.86	0/0:2.24	0/0:1.98
16	60037001	-0.00784323	0.0376849	LHX4	intronic	16:60037001-60040500	CN0	0.664339	1/1:0.1	1/1:0.06	1/1:0.06	1/1:0.02	1/1:0.04	1/1:0.06	1/1:0.04	1/1:0.24	1/1:0.02	1/1:0.1	1/1:0.02	1/1:0.08	1/1:0.08	1/1:0.2	1/1:0.06	1/1:0.04	1/1:0.02	1/1:0.12	1/1:0.08	1/1:0.1	1/1:0.06	1/1:0.08	1/1:0.08	1/1:0.04	1/1:0.14	1/1:0.04	1/1:0.02	1/1:0.06	1/1:0.14	1/1:0.06	1/1:0.24	1/1:0.24	1/1:0.14	1/1:0.22	1/1:0.36	1/1:0.3	1/1:0.2	1/1:0.24	1/1:0.38	1/1:0.22	1/1:0.28
16	64889001	-0.00887152	0.000689468	IVNS1ABP	exonic	16:64889001-64897500	CN2	0.650535	0/0:2.18	0/0:2.02	0/0:1.96	0/0:2.1	0/0:1.94	0/1:2.58	0/0:1.94	0/0:2.02	0/0:1.98	0/0:2.06	0/0:2.24	0/0:2.08	0/0:2.0	0/1:2.56	0/0:1.78	0/0:1.98	0/0:2.08	0/1:2.68	0/0:2.28	0/0:2.3	0/0:2.22	0/0:2.08	0/0:2.06	0/0:1.96	0/0:2.1	0/0:1.88	0/0:2.24	0/0:1.94	0/0:1.98	0/1:2.54	0/0:2.14	0/1:2.42	0/0:2.1	0/0:2.22	0/0:1.94	0/0:2.18	0/0:2.38	0/0:2.3	0/0:2.0	0/0:2.12	0/0:1.64
16	66370001	-0.00881501	-0.00308259	PTGS2(dist=16806),PLA2G4A(dist=158914)	intergenic	16:66370001-66374000	CN0	0.826064	0/1:1.24	1/1:0.06	0/0:1.82	0/0:1.98	0/1:1.1	0/0:2.08	0/0:2.28	0/1:0.9	1/1:0.02	0/1:0.86	1/1:0.04	0/0:1.7	0/1:1.08	0/0:2.02	0/0:2.16	0/1:1.18	0/0:1.72	0/1:1.1	0/0:1.8	0/1:1.08	0/0:1.8	0/0:2.12	0/1:1.12	0/1:1.1	0/1:0.8	0/0:1.86	0/1:1.22	0/1:1.16	0/0:1.98	0/1:1.04	0/1:1.1	0/1:1.02	0/1:1.28	0/1:1.06	0/0:2.2	0/1:1.06	0/1:1.04	0/0:1.98	1/1:0.04	0/1:1.06	0/1:1.22
16	66489501	0.0429854	0.00913037	PTGS2(dist=136306),PLA2G4A(dist=40914)	intergenic	16:66489501-66492000	CN0,CN2	0.668205	0/0:2.08	0/0:1.94	0/1:1.12	0/0:1.96	0/0:2.08	0/0:2.06	0/0:1.92	0/0:2.18	0/0:1.92	0/0:2.18	0/0:1.68	0/1:1.24	0/0:1.82	0/1:1.3	0/0:1.92	0/0:2.12	0/0:1.98	0/0:2.02	0/0:2.02	0/0:1.96	0/0:2.0	0/0:1.92	0/0:1.98	0/0:1.86	0/0:1.64	0/0:1.7	0/0:2.1	0/0:1.96	0/0:2.38	0/0:1.96	0/0:1.94	0/1:1.06	0/1:1.14	0/1:1.38	0/1:1.02	0/1:1.2	0/1:1.0	0/0:1.86	0/0:2.1	1/1:0.42	0/0:1.54
16	67391501	0.025169	0.0271283	KCNK2(dist=176610),CENPF(dist=176067)	intergenic	16:67391501-67394500	CN0	0.746573	0/1:1.12	1/1:0.22	1/1:0.4	0/1:1.22	0/0:1.72	0/1:0.88	0/0:1.94	0/1:0.92	1/1:0.16	0/1:1.24	1/1:0.26	1/1:0.18	0/1:1.26	1/1:0.16	0/0:2.08	1/1:0.18	1/1:0.26	0/1:1.18	0/1:1.16	0/1:1.24	0/0:1.92	0/1:1.16	0/0:2.06	0/0:1.82	0/0:1.68	0/1:1.08	0/1:1.24	1/1:0.18	0/1:1.02	1/1:0.4	0/1:1.28	0/1:1.38	0/0:2.34	0/1:0.86	0/1:1.2	0/0:1.86	0/0:2.18	1/1:0.2	1/1:0.38	0/1:1.14	0/1:1.3
16	74257501	-6.264e-05	0.0525519	LOC102169209(dist=32834),MIR29C(dist=9116)	intergenic	16:74257501-74261000	CN0	0.760297	0/1:1.14	0/1:1.24	0/1:0.86	0/1:0.94	0/1:1.24	0/1:1.46	0/1:1.04	0/1:1.2	0/1:0.94	0/1:1.18	0/1:1.1	0/1:1.1	0/1:1.12	0/1:1.06	0/1:1.36	0/1:1.26	0/1:1.74	0/1:1.24	0/1:1.28	0/1:1.24	0/1:1.3	0/1:1.3	0/1:1.28	0/1:0.98	0/1:1.04	0/1:1.28	0/1:0.84	0/1:1.44	0/1:0.78	0/1:1.1	0/1:0.9	0/1:0.84	0/1:1.08	0/1:0.74	0/1:0.9	0/1:0.76	0/1:0.88	0/1:1.18	0/1:0.98	0/1:0.82	0/1:1.12
16	74544001	0.00252977	0.00124387	LOC102169690(dist=7661),F13B(dist=4761)	intergenic	16:74544001-74547000	CN0	0.780788	0/0:2.1	0/0:2.14	0/0:1.84	0/0:2.04	0/0:2.08	0/0:2.38	0/0:2.08	0/0:2.18	0/0:1.98	0/0:2.02	0/0:1.9	0/1:0.86	0/0:1.86	0/0:2.3	0/0:1.86	0/0:2.34	0/0:1.86	0/0:2.3	0/0:2.04	0/0:1.7	0/0:1.98	0/0:2.18	0/0:2.16	0/0:2.12	0/0:2.0	0/0:1.52	0/0:2.02	0/0:1.84	0/0:2.12	0/0:2.0	0/0:1.78	0/0:1.88	0/0:2.04	0/0:2.18	0/0:1.86	0/0:1.94	0/0:1.74	0/0:2.04	0/0:1.88	0/0:2.12	0/0:2.2
16	77309001	0.0294702	0.0129165	LOC102174324(dist=894851),NR5A2(dist=100808)	intergenic	16:77309001-77316500	CN2	0.781179	0/0:2.0	0/0:1.8	0/0:2.1	0/0:2.1	1/1:4.18	0/0:2.02	0/1:2.94	0/0:2.32	0/0:2.02	0/1:2.76	1/1:3.98	0/1:2.74	0/1:3.02	0/0:2.32	0/0:2.14	0/1:3.0	0/0:2.0	0/1:3.08	0/0:1.9	0/1:2.9	0/0:1.96	1/1:3.9	0/1:2.8	1/1:3.6	0/1:3.12	0/1:2.76	1/1:3.56	0/1:3.0	0/1:3.04	0/0:2.06	0/0:1.92	0/0:2.02	0/0:2.08	0/0:2.1	0/0:1.94	0/0:1.86	0/0:1.86	0/0:2.0	0/0:2.22	0/0:1.98	0/0:1.86
16	79240001	0.0201063	-0.00236824	CSRP1,PHLDA3	exonic	16:79240001-79304000	CN2,CNH	0.664983	0/1:2.46	0/0:1.94	0/0:2.08	0/0:2.16	0/1:2.5	0/1:2.44	0/0:2.1	0/0:2.42	0/0:1.98	0/0:2.04	0/1:2.98	0/0:2.1	0/1:2.5	0/0:1.98	0/0:2.08	0/0:2.06	0/0:2.02	0/0:2.04	0/0:2.06	0/0:2.06	0/0:2.1	0/1:2.56	0/0:2.02	0/1:2.96	0/0:2.1	0/0:2.06	0/0:2.02	0/0:2.02	0/0:2.04	0/1:2.48	0/0:2.0	0/0:2.36	0/0:2.12	0/0:2.0	0/0:2.16	0/0:2.1	0/0:2.14	0/0:2.08	0/0:2.08	0/0:2.06	0/0:1.94
17	320001	-0.002504	-0.00117743	LOC108637843(dist=6515),LOC102175508(dist=1152)	intergenic	17:320001-338000	CN0	0.839906	0/0:1.92	0/1:1.12	0/1:0.92	0/1:0.9	0/0:2.1	0/1:1.06	0/1:1.06	0/1:1.14	0/0:2.34	0/0:1.8	0/0:1.84	0/0:1.74	0/0:1.96	0/0:1.8	0/1:1.02	0/1:1.08	0/0:2.16	0/0:1.92	0/0:1.94	0/0:1.84	0/0:1.82	0/0:1.98	0/1:1.02	0/0:1.88	0/1:0.96	0/1:0.96	0/0:1.98	0/0:1.46	0/1:1.04	0/1:1.12	0/0:2.04	0/0:1.76	0/1:1.12	0/0:2.1	1/1:0.04	0/1:1.06	1/1:0.04	0/1:1.14	0/1:1.14	1/1:0.04	0/1:1.06
17	6202501	0.00686592	-0.00176856	TRNAS-GGA	ncRNA_exonic	17:6202501-6205000	CN0	0.832045	1/1:0.1	1/1:0.1	1/1:0.08	0/1:1.26	1/1:0.2	0/1:0.88	1/1:0.14	1/1:0.2	1/1:0.14	1/1:0.18	1/1:0.06	1/1:0.22	0/1:1.06	0/1:1.18	0/1:1.26	1/1:0.14	1/1:0.18	1/1:0.18	0/0:1.82	0/1:1.22	0/1:1.04	0/1:1.14	0/0:1.98	0/1:1.1	1/1:0.14	0/1:1.28	0/1:1.06	1/1:0.1	0/1:1.1	1/1:0.22	1/1:0.14	1/1:0.2	0/1:1.14	1/1:0.24	1/1:0.1	1/1:0.28	1/1:0.24	1/1:0.06	1/1:0.16	1/1:0.28	1/1:0.12
17	9697501	-0.00493134	0.00765511	LOC102190983,LOC108637852	exonic	17:9697501-9778000	CN2	0.725759	0/0:2.1	0/0:2.1	0/0:2.42	0/0:2.18	0/0:2.22	0/0:2.26	0/0:2.14	0/0:2.2	0/0:2.08	0/0:2.26	0/0:2.28	0/0:2.12	0/0:2.06	0/0:2.18	0/0:2.2	0/0:2.1	0/0:2.5	0/0:2.12	0/0:2.4	0/0:2.18	0/0:2.04	0/0:2.42	0/0:2.34	0/0:2.16	0/0:2.3	0/0:2.3	0/0:2.22	0/0:2.22	0/1:3.04	0/0:2.2	0/0:2.1	0/0:2.02	0/0:2.36	0/0:2.18	0/0:2.26	0/0:2.16	0/0:2.06	0/0:2.2	0/0:2.2	0/0:2.14	0/0:2.1
17	27439001	-0.0036061	0.00307862	NONE(dist=NONE),GUCY1A3(dist=33745)	intergenic	17:27439001-27444500	CN2,CNH	0.699656	0/0:2.1	0/0:2.32	0/0:2.38	0/0:1.96	0/0:2.26	0/0:2.46	0/0:2.0	0/0:2.46	2/2:6.24	0/0:2.46	0/0:2.12	0/0:2.12	0/0:2.1	0/0:1.84	0/0:2.42	0/0:2.3	0/1:2.7	0/0:2.12	0/0:2.34	0/1:2.6	0/0:2.12	0/0:2.32	0/0:2.16	0/0:2.36	0/0:2.48	0/0:2.24	0/0:2.16	0/0:2.36	0/0:2.24	0/0:2.1	0/0:2.04	0/0:1.84	0/0:1.86	0/0:2.14	0/0:2.26	0/0:2.02	0/0:2.08	0/0:2.38	0/0:2.1	0/0:2.0	0/0:1.84
17	29591001	-0.00775644	-0.00532188	GRIA2(dist=267045),FAM198B(dist=627226)	intergenic	17:29591001-29595500	CN0	0.861644	0/1:1.02	1/1:0.02	0/0:2.04	0/1:1.3	0/1:1.2	1/1:0.0	1/1:0.02	0/0:1.98	1/1:0.0	0/1:1.16	0/0:2.38	0/0:1.92	0/0:2.14	0/0:2.06	1/1:0.02	0/1:1.18	0/1:0.86	0/1:1.18	0/0:2.06	0/0:2.16	0/0:2.34	0/0:2.14	0/1:1.08	0/0:1.88	0/0:2.04	0/0:2.04	0/1:1.14	0/0:1.9	0/1:1.22	0/1:1.1	0/1:1.08	0/0:2.14	0/1:0.92	0/0:2.22	0/0:1.92	0/1:1.2	0/1:1.2	0/1:1.0	0/0:2.1	0/1:1.18	0/0:1.88
17	30493501	-0.0100107	-0.00177587	TMEM144(dist=96396),RXFP1(dist=117574)	intergenic	17:30493501-30498000	CN0,CN2	0.65532	0/0:2.1	0/0:2.12	1/1:0.0	0/0:2.54	0/0:2.18	0/0:2.24	0/0:2.04	0/0:2.34	0/0:2.44	0/0:2.0	0/0:2.26	0/1:1.06	0/0:2.36	0/0:2.46	0/0:2.24	0/0:2.34	0/0:2.1	0/1:1.0	0/1:0.94	0/1:1.24	0/1:1.08	0/1:1.1	0/0:2.12	0/0:2.1	0/0:2.3	0/0:2.3	0/0:1.92	0/1:1.06	0/1:1.28	0/0:1.92	0/0:1.9	0/0:2.08	0/0:2.0	0/0:2.22	0/0:2.02	0/0:1.92	0/0:1.82	0/1:1.04	0/0:2.28	0/1:1.02	0/0:1.94
17	30556001	0.0555766	0.0147202	TMEM144(dist=158896),RXFP1(dist=55574)	intergenic	17:30556001-30560000	CN0	0.805068	1/1:0.18	0/0:2.06	0/0:2.5	0/1:1.2	0/1:1.12	0/1:1.1	0/1:1.0	0/1:1.0	0/0:2.12	0/1:1.02	0/1:1.1	0/0:2.2	0/0:1.84	0/1:1.36	1/1:0.06	1/1:0.1	1/1:0.04	0/1:0.76	0/1:1.5	0/0:2.44	0/0:2.42	0/0:1.92	1/1:0.16	0/1:1.14	0/0:2.36	0/0:2.26	0/1:0.92	0/0:1.9	0/0:2.32	0/0:1.8	0/0:1.98	0/0:1.86	0/0:2.04	0/0:2.04	0/0:2.16	0/0:2.24	0/0:1.9	0/0:1.84	0/0:2.06	0/0:1.96	0/0:2.12
17	31490501	0.196926	0.086713	RAPGEF2(dist=58098),LOC102187701(dist=1152153)	intergenic	17:31490501-31497500	CN0	0.843547	0/0:2.08	0/0:2.16	0/0:1.96	0/0:1.98	0/0:2.12	1/1:0.0	0/0:2.18	0/0:2.14	0/0:1.96	0/1:1.08	0/0:2.12	1/1:0.06	0/1:1.12	0/1:0.86	1/1:0.04	0/1:1.04	0/0:1.82	0/1:1.36	0/1:1.36	1/1:0.0	1/1:0.02	0/1:1.0	1/1:0.0	0/1:1.04	0/0:2.22	0/0:2.14	0/1:0.92	0/0:2.14	1/1:0.04	0/0:2.06	0/0:1.98	0/0:1.98	0/0:2.02	0/0:2.12	0/0:2.18	0/0:1.98	0/0:2.24	0/0:2.14	0/0:2.06	0/0:2.2	0/0:1.82
17	32086501	-0.00754306	0.00079394	RAPGEF2(dist=654098),LOC102187701(dist=557653)	intergenic	17:32086501-32092000	CN2,CNH	0.749352	0/0:2.36	0/1:3.2	0/0:2.44	0/0:2.2	0/0:2.36	0/0:2.24	0/0:2.16	0/0:2.36	0/0:1.98	0/0:2.2	0/0:2.3	0/0:2.22	0/0:2.06	0/0:2.2	0/0:2.26	0/0:2.12	0/0:2.54	0/0:2.38	0/0:2.38	0/0:2.42	0/0:2.2	0/0:2.2	0/0:2.02	0/0:2.2	0/0:2.36	0/1:2.86	0/0:2.06	0/0:2.06	0/0:2.46	0/0:1.96	0/0:2.14	0/0:1.84	0/0:2.08	0/0:1.82	0/0:2.02	0/0:1.9	0/0:1.88	0/0:1.92	0/0:1.74	0/0:1.96	0/0:1.92
17	33128001	-0.00843851	-0.00172072	LOC102187701(dist=477852),LOC102187421(dist=273815)	intergenic	17:33128001-33152000	CN0	0.880338	0/0:2.1	0/0:1.94	0/0:1.94	0/0:1.96	0/0:1.94	0/1:1.14	0/0:2.1	0/0:2.24	0/0:2.08	0/0:2.0	0/0:2.12	0/0:2.0	0/0:2.04	0/1:1.02	0/0:2.08	0/0:2.02	0/0:2.04	0/0:2.0	0/0:1.9	0/0:2.16	0/0:2.06	0/0:1.92	0/1:1.08	0/0:1.96	0/0:1.88	0/0:1.96	0/0:1.98	0/0:1.96	0/0:2.04	0/0:1.94	0/0:1.98	0/1:1.0	0/1:1.02	0/1:1.1	0/1:1.06	0/0:2.0	0/1:0.98	0/0:1.86	0/0:1.9	0/1:0.94	0/0:1.72
17	34534501	-0.00943522	-0.00261526	FSTL5	intronic	17:34534501-34544000	CN0,CN2	0.73739	0/0:1.96	0/0:1.84	0/0:1.88	0/0:2.1	0/0:1.68	0/0:1.86	0/0:1.86	0/0:1.8	0/0:1.84	0/0:1.56	0/1:0.98	0/0:1.92	0/0:1.92	0/0:1.86	0/0:1.76	0/0:2.02	0/0:2.0	0/1:1.2	0/0:1.94	0/0:2.06	0/1:1.0	0/1:1.1	0/0:1.86	0/0:1.84	0/0:1.9	0/0:1.66	0/0:1.88	0/0:2.02	0/0:2.06	0/0:1.7	0/0:2.14	0/0:1.96	0/0:1.82	0/0:1.9	0/0:1.78	0/0:2.04	0/0:2.08	0/0:1.54	0/0:1.94	0/1:0.98	0/2:2.76
17	37383501	0.00155775	-0.0020047	SPRY1(dist=634900),ANKRD50(dist=568053)	intergenic	17:37383501-37387500	CN0,CN2	0.789744	0/0:2.18	0/1:1.16	0/0:1.94	0/0:1.98	0/0:2.36	1/1:0.0	0/0:2.14	0/0:2.6	1/1:0.04	1/1:0.0	0/1:0.96	0/1:0.84	0/1:1.02	0/1:0.82	0/1:1.2	0/0:2.0	0/1:1.06	0/0:2.3	0/1:0.84	0/0:2.2	0/0:1.96	0/0:2.04	0/0:2.18	0/1:1.42	0/1:0.88	0/1:1.44	0/1:1.04	0/0:2.04	0/1:0.9	0/0:1.92	0/0:2.24	0/0:2.26	0/0:2.18	0/0:1.74	0/0:1.92	0/0:2.12	0/1:0.92	0/0:1.92	0/0:2.18	0/0:2.08	0/1:1.16
17	39343001	-0.0135271	-0.00418972	FAT4(dist=570017),INTU(dist=1428294)	intergenic	17:39343001-39348000	CN2,CNH	0.820902	0/0:1.98	0/0:1.92	0/0:1.92	0/0:2.18	0/0:1.86	0/0:1.98	0/0:2.2	2/2:9.6	0/0:1.8	0/0:2.18	0/0:1.84	0/0:2.02	0/0:2.0	0/0:1.84	0/0:2.38	0/0:1.88	0/0:1.72	0/0:1.74	0/0:1.82	0/0:1.86	0/0:1.92	0/0:1.86	2/2:8.52	0/0:2.02	0/0:2.14	0/0:1.96	0/0:1.82	0/0:1.8	0/0:2.2	0/0:2.06	0/0:1.96	0/0:1.68	0/0:1.88	0/0:1.8	0/0:2.04	0/0:2.24	0/0:1.74	0/0:1.94	0/0:1.86	0/0:1.96	0/0:1.74
17	40715501	0.126497	0.0365447	FAT4(dist=1942517),INTU(dist=57794)	intergenic	17:40715501-40718500	CN0,CN2	0.664229	0/0:2.04	0/1:1.44	0/0:2.12	0/1:1.44	0/1:1.28	0/0:1.58	1/1:0.02	0/0:1.52	0/0:1.8	0/0:1.58	0/1:1.26	0/0:1.7	1/1:0.04	0/0:1.48	0/0:1.76	0/1:1.14	0/0:1.52	0/1:1.2	1/1:0.0	1/1:0.16	0/1:1.38	0/0:2.22	0/0:2.1	1/1:0.34	0/0:2.08	0/1:1.3	0/0:1.78	0/0:1.46	1/1:0.0	0/0:1.88	0/1:1.14	0/0:2.28	1/1:0.14	0/0:1.98	0/0:1.5	0/0:2.3	0/0:1.62	0/0:2.16	1/1:0.26	0/0:1.6	1/1:0.44
17	45658501	-0.00505632	-0.00403716	LOC102171361(dist=1321068),TRNAC-GCA(dist=30371)	intergenic	17:45658501-45663000	CN0,CN2	0.663239	0/0:1.94	0/0:1.88	0/0:1.82	0/0:1.94	0/0:1.7	0/0:1.84	0/0:2.04	0/0:1.68	0/0:1.78	0/0:2.02	0/0:2.0	0/0:1.9	0/0:1.98	0/0:1.86	0/0:1.7	0/0:2.12	0/0:2.0	0/0:1.62	0/0:2.44	0/0:1.88	0/0:2.34	0/1:1.0	0/1:1.12	0/0:2.0	0/0:1.92	0/0:1.92	0/0:2.32	0/0:1.78	0/0:1.86	0/0:1.84	0/0:2.28	0/0:2.36	0/0:1.84	0/0:1.96	0/0:2.16	0/0:2.1	0/0:1.98	0/0:1.86	0/0:2.0	0/0:2.08	0/0:1.86
17	46655501	0.0597681	0.0242236	PCDH10(dist=890950),PABPC4L(dist=54716)	intergenic	17:46655501-46683000	CN2,CNH	0.877238	0/0:1.96	0/0:1.96	0/0:1.82	0/0:1.82	0/0:1.86	0/0:1.76	0/0:1.9	0/0:2.1	0/0:1.92	0/0:1.9	0/0:1.88	0/0:1.98	0/0:1.92	0/0:2.04	0/0:2.02	0/0:1.96	0/0:1.98	0/0:2.06	0/0:2.06	0/0:2.0	0/0:2.04	0/0:1.98	0/0:1.98	0/0:1.88	0/0:2.06	0/0:1.98	0/0:1.94	0/0:1.98	0/0:2.0	0/0:1.82	0/0:1.94	0/0:2.04	0/0:2.0	0/0:1.94	0/0:1.8	0/0:1.98	0/0:1.96	0/0:1.88	0/0:1.96	0/0:1.94	0/0:2.26
17	46682501	-0.0103681	-0.00284005	PCDH10(dist=917950),PABPC4L(dist=51716)	intergenic	17:46682501-46686000	CN0	0.797127	0/0:1.54	0/1:1.28	0/1:0.96	0/1:1.4	0/1:1.26	1/1:0.34	0/1:1.06	1/1:0.32	1/1:0.32	0/1:0.94	0/1:1.2	0/1:1.24	0/1:1.24	1/1:0.56	0/1:1.22	1/1:0.34	0/1:1.26	0/1:1.12	0/1:1.32	1/1:0.4	1/1:0.34	1/1:0.34	0/1:1.42	1/1:0.26	0/0:1.82	0/1:1.36	0/1:0.92	1/1:0.38	0/1:0.7	1/1:0.2	1/1:0.4	1/1:0.2	1/1:0.36	1/1:0.44	1/1:0.36	1/1:0.46	1/1:0.3	1/1:0.28	1/1:0.18	1/1:0.36	1/1:0.44
17	48080501	0.0398683	0.0334696	LOC102170541(dist=602807),NONE(dist=NONE)	intergenic	17:48080501-48092000	CN0	0.842575	0/0:2.06	0/0:2.06	0/0:1.84	0/0:1.88	0/0:2.18	0/0:1.88	0/0:2.2	1/1:0.04	0/0:2.0	0/0:2.12	0/1:1.04	0/0:2.12	0/0:2.14	0/0:2.2	0/0:2.26	0/1:0.94	0/0:2.14	0/0:2.26	0/0:2.42	0/1:1.34	0/0:2.3	0/0:2.16	0/0:2.16	0/0:2.02	0/0:2.0	0/0:2.28	0/0:2.16	0/1:1.2	0/1:1.16	1/1:0.0	1/1:0.0	0/0:2.0	1/1:0.04	0/0:1.96	1/1:0.04	1/1:0.0	1/1:0.0	0/1:1.14	0/0:1.8	1/1:0.02	0/1:1.04
17	49087001	-0.00711113	-0.0020405	LOC102170541(dist=1609307),LOC108637880(dist=1235991)	intergenic	17:49087001-49093000	CN0	0.802335	0/1:1.2	0/1:1.08	1/1:0.08	0/1:1.36	1/1:0.28	0/1:1.24	0/1:1.22	0/0:1.88	0/0:2.08	1/1:0.16	0/0:2.04	1/1:0.34	0/1:1.14	0/0:2.2	1/1:0.18	0/1:0.98	1/1:0.14	0/0:1.62	0/1:1.04	0/1:1.1	1/1:0.16	0/1:1.14	1/1:0.18	1/1:0.3	1/1:0.14	0/0:1.96	0/1:1.34	0/1:1.08	0/1:0.84	0/1:1.34	0/0:1.9	1/1:0.22	0/0:1.74	0/1:0.96	0/0:1.88	0/1:1.06	0/1:1.06	1/1:0.22	0/1:1.06	0/1:1.04	0/0:1.74
17	49886501	-0.00837778	-0.000612184	NONE(dist=NONE),LOC108637880(dist=433991)	intergenic	17:49886501-49895000	CN0	0.801441	0/0:2.14	0/1:1.12	0/0:2.28	0/0:2.08	0/0:2.26	0/0:2.2	0/0:2.14	0/0:2.52	0/1:0.94	0/0:2.3	0/0:2.34	0/0:1.94	0/0:2.12	0/0:2.36	0/0:2.22	0/0:2.02	0/0:2.16	0/0:2.16	0/1:1.14	0/0:2.28	0/0:2.3	0/0:2.12	0/0:2.08	0/0:2.0	0/0:2.3	0/1:1.04	0/0:1.96	0/0:2.28	0/0:1.92	0/0:2.12	0/0:2.02	0/0:1.86	0/0:2.0	0/0:1.78	0/0:2.26	0/0:2.0	0/0:1.88	0/0:2.2	0/0:1.76	0/0:1.96	0/0:2.24
17	56423501	-0.0072617	-0.00492249	USP38(dist=113258),TRNAK-UUU(dist=6613)	intergenic	17:56423501-56429500	CN0,CN2,CNH	0.740438	0/0:2.1	0/0:2.06	0/0:1.86	0/0:2.52	0/0:2.48	0/0:2.3	0/1:1.02	0/0:2.32	0/0:2.18	0/1:1.36	3/3:7.16	0/0:2.0	0/0:2.06	0/0:2.14	0/0:2.2	0/0:2.16	0/1:1.16	0/1:1.08	0/0:2.08	0/1:1.32	0/0:1.8	0/0:2.24	0/0:2.18	0/0:1.94	0/1:1.1	0/0:2.32	0/0:2.46	0/0:2.08	0/1:1.18	0/0:2.38	0/0:1.72	0/0:1.58	0/1:1.14	1/1:0.02	0/1:0.94	0/0:1.94	0/0:1.94	0/1:1.08	0/0:2.1	0/1:1.06	0/1:1.24
17	56642001	-0.00129629	0.00516096	FREM3,HHIP,LOC108637865	exonic	17:56642001-57433000	CN2,CNH	0.67492	0/0:2.12	0/0:2.18	0/1:2.54	0/0:2.22	0/0:2.42	0/0:2.08	0/0:2.22	0/0:2.36	0/0:2.1	0/0:2.4	0/0:2.28	0/0:2.18	0/0:2.3	0/0:2.24	0/1:2.52	0/0:2.18	0/0:2.16	0/0:2.3	0/0:2.3	0/0:2.3	0/0:2.24	0/0:2.26	0/0:2.3	0/0:2.04	0/0:2.12	0/0:2.34	0/0:2.28	0/0:2.32	0/0:2.26	0/0:2.14	0/0:2.14	0/0:2.1	0/0:1.96	0/0:2.0	0/0:2.12	0/0:1.96	0/0:2.02	0/0:2.02	0/0:2.0	0/0:2.14	0/0:2.08
17	60061501	0.0513009	0.0259008	ARHGAP10,EDNRA,NR3C2,PRMT9,TMEM184C	exonic	17:60061501-61172000	CN2	0.954957	0/0:1.98	0/0:2.0	0/0:2.02	0/0:2.02	0/0:2.04	0/0:1.96	0/0:2.0	0/0:2.02	0/0:2.0	0/0:1.96	0/0:2.02	0/0:2.0	0/0:2.0	0/0:1.98	0/0:2.04	0/0:1.98	0/0:2.02	0/0:2.06	0/0:2.04	0/0:2.0	0/0:1.98	0/0:2.0	0/0:2.0	0/0:1.98	0/0:2.02	0/0:2.04	0/0:1.98	0/0:2.0	0/0:2.0	0/0:2.12	0/0:2.0	0/0:2.02	0/0:2.0	0/0:2.0	0/0:2.0	0/0:2.02	0/0:2.02	0/0:2.02	0/0:2.0	0/0:2.0	0/0:2.08
17	67678001	0.0185109	0.0167434	DCHS2	intronic	17:67678001-67682500	CN0	0.818945	0/0:1.96	0/1:1.14	0/0:1.9	0/0:2.26	0/0:2.0	0/1:1.1	0/0:2.02	0/1:1.3	0/1:1.28	0/0:2.38	0/0:2.26	0/1:1.18	0/0:2.04	0/0:2.16	0/0:2.02	0/1:1.16	0/0:2.16	0/1:0.82	0/0:2.34	0/1:0.8	0/0:2.1	0/0:2.16	0/1:1.1	0/1:1.2	0/1:1.26	0/0:2.1	0/0:2.42	0/1:1.38	0/1:1.24	0/1:1.1	0/1:1.14	0/0:2.22	0/0:1.86	0/0:2.02	0/1:0.94	0/0:2.08	0/0:2.1	0/1:0.96	0/1:0.98	0/1:1.22	0/0:1.86
17	68259501	-0.00513949	0.00140962	LRAT(dist=41617),RBM46(dist=27390)	intergenic	17:68259501-68271500	CN0	0.88366	0/0:2.12	0/0:2.08	0/0:2.04	0/1:1.1	0/0:1.98	0/0:2.18	0/0:2.18	0/0:2.18	0/0:2.04	0/0:1.92	0/0:2.28	0/0:2.04	0/1:0.98	0/0:2.02	0/0:2.4	0/0:2.02	0/0:1.98	0/0:2.18	0/0:2.26	0/0:1.98	0/0:2.08	0/0:2.08	0/0:2.16	0/1:1.18	0/0:2.04	0/0:2.34	0/0:2.2	0/0:2.1	0/0:2.12	0/0:1.9	0/0:2.08	0/0:2.1	1/1:0.0	0/0:2.06	0/1:1.0	1/1:0.0	1/1:0.0	0/1:1.12	0/0:2.04	1/1:0.0	0/0:2.2
17	68273501	-0.0022591	-0.00112949	LRAT(dist=55617),RBM46(dist=13890)	intergenic	17:68273501-68285000	CN0,CN2	0.832128	0/0:1.98	0/0:1.88	0/0:2.12	0/1:1.06	0/0:2.04	0/0:2.14	0/0:1.98	0/0:2.02	0/0:1.92	0/0:2.12	0/0:2.34	0/0:1.96	0/1:1.12	0/0:2.16	0/0:2.12	0/0:1.96	0/0:2.1	0/0:1.78	0/0:2.34	0/0:2.04	0/0:2.06	0/0:2.02	0/0:2.06	0/1:1.16	0/0:2.14	0/0:2.06	0/0:2.18	0/0:1.88	0/0:2.02	0/0:1.92	0/0:2.2	0/0:2.04	1/1:0.02	0/0:1.96	0/1:1.1	1/1:0.02	1/1:0.02	0/1:1.1	0/0:2.04	1/1:0.02	0/0:2.42
17	68416001	0.0603465	0.0283875	LOC108637882(dist=9647),LOC108637883(dist=11191)	intergenic	17:68416001-68420500	CN2	0.720022	0/0:1.9	0/0:2.02	0/0:2.08	0/0:2.04	0/0:2.0	0/0:2.4	0/0:2.14	0/0:2.12	0/0:2.06	0/0:2.22	0/0:2.24	0/0:2.16	0/0:2.3	0/1:2.68	0/0:2.2	0/0:2.36	0/0:2.24	0/0:2.38	0/0:2.32	0/0:2.26	0/0:2.2	0/0:2.34	0/0:2.18	0/0:2.2	0/0:1.88	0/0:2.52	0/1:2.66	0/0:2.44	0/0:2.32	0/0:2.1	0/0:2.12	0/0:2.42	0/0:2.1	0/0:2.14	0/0:2.44	0/0:2.18	0/0:2.4	0/0:2.14	0/0:2.12	0/0:2.16	0/0:2.14
17	68422501	0.0953103	0.039171	LOC108637883	exonic	17:68422501-68443000	CN2	0.788286	0/0:2.02	0/0:2.12	0/0:2.24	0/0:1.96	0/0:2.28	0/0:1.94	0/0:2.14	0/0:2.22	0/0:2.1	0/0:2.3	0/0:2.16	0/0:1.94	0/0:2.06	0/0:2.3	0/0:2.0	0/0:2.12	0/0:2.3	0/0:2.24	0/0:2.06	0/0:2.16	0/0:2.12	0/0:2.04	0/0:2.22	0/0:2.1	0/0:2.26	0/0:2.14	0/0:2.16	0/0:2.1	0/0:2.14	0/0:2.14	0/0:2.32	0/0:2.28	0/0:2.24	0/0:2.16	0/0:2.22	0/0:2.02	0/0:2.06	0/0:1.98	0/0:2.12	0/0:2.02	0/1:2.56
17	68452501	0.0825114	0.05743	LOC108637883(dist=6406),LOC108637897(dist=32234)	intergenic	17:68452501-68472000	CN2	0.861296	0/0:2.04	0/0:2.02	0/0:1.86	0/0:1.92	0/0:1.92	0/0:1.82	0/0:2.0	0/0:1.98	0/0:2.02	0/0:1.92	0/0:1.96	0/0:1.9	0/0:1.98	0/0:1.98	0/0:2.06	0/0:2.0	0/0:1.86	0/0:2.0	0/0:2.1	0/0:2.02	0/0:1.9	0/0:2.0	0/0:1.94	0/0:1.96	0/0:2.12	0/0:2.0	0/0:1.96	0/0:1.88	0/0:1.96	0/0:1.88	0/0:2.14	0/0:2.14	0/0:2.08	0/0:1.98	0/0:2.24	0/0:1.94	0/0:2.12	0/0:2.06	0/0:1.92	0/0:2.04	0/0:2.0
17	68473001	0.0806103	0.0523592	LOC108637883(dist=26906),LOC108637897(dist=12234)	intergenic	17:68473001-68492000	CN2	0.864496	0/0:2.08	0/0:2.08	0/0:1.98	0/0:1.98	0/0:1.94	0/0:1.96	0/0:2.0	0/0:1.82	0/0:2.06	0/0:2.04	0/0:1.92	0/0:2.0	0/0:1.94	0/0:2.04	0/0:1.94	0/0:2.0	0/0:2.12	0/0:1.9	0/0:2.0	0/0:1.84	0/0:1.92	0/0:2.04	0/0:2.08	0/0:2.04	0/0:1.98	0/0:1.8	0/0:2.12	0/0:1.94	0/0:2.02	0/0:1.96	0/0:2.02	0/0:2.1	0/0:2.04	0/0:2.02	0/0:2.18	0/0:1.98	0/0:2.12	0/0:2.0	0/0:2.12	0/0:2.02	0/0:2.0
17	68518501	0.0806103	0.0426133	LOC108637897(dist=4358),LOC102178931(dist=99398)	intergenic	17:68518501-68653500	CN2	0.874587	0/0:2.06	0/0:2.04	0/0:2.06	0/0:2.04	0/0:2.04	0/0:2.06	0/0:2.1	0/0:2.06	0/0:2.1	0/0:2.1	0/0:2.04	0/0:2.1	0/0:2.02	0/0:2.1	0/0:2.1	0/0:2.06	0/0:2.1	0/0:1.98	0/0:1.96	0/0:2.02	0/0:2.04	0/0:2.1	0/0:2.08	0/0:2.04	0/0:2.06	0/0:2.06	0/0:2.06	0/0:2.0	0/0:2.04	0/0:1.92	0/0:2.04	0/0:1.96	0/0:2.04	0/0:2.04	0/0:2.14	0/0:2.02	0/0:2.0	0/0:2.06	0/0:2.1	0/0:2.1	0/0:2.04
17	68653001	0.00580386	0.0136335	LOC102178931	ncRNA_exonic	17:68653001-68774500	CN0,CN2	0.730967	0/2:2.46	0/2:2.7	0/2:2.64	0/2:2.68	0/2:2.74	0/2:2.62	0/2:2.76	0/2:2.66	0/2:2.66	0/2:2.76	0/2:2.52	0/2:2.64	0/2:2.6	0/2:2.78	0/2:2.74	0/2:2.7	0/2:2.72	0/2:2.74	0/2:2.48	0/2:2.66	0/0:2.4	0/2:2.64	0/2:2.6	0/2:2.48	0/2:2.7	0/2:2.64	0/2:2.66	0/2:2.64	0/2:2.68	0/0:2.28	0/2:2.62	0/2:2.64	0/2:2.68	0/2:2.72	0/2:2.84	0/2:2.68	0/2:2.72	0/2:2.66	0/2:2.52	0/2:2.7	0/2:2.72
17	68974001	-0.00327357	0.0043929	TMEM192(dist=96282),KLHL2(dist=39820)	intergenic	17:68974001-68978500	CN0	0.800341	0/1:1.04	0/1:1.0	0/0:1.82	0/0:2.08	0/1:1.34	0/0:2.38	0/0:2.18	0/1:1.16	0/0:2.16	0/0:2.12	0/1:1.14	0/0:2.06	1/1:0.04	0/0:2.02	0/1:1.3	0/0:2.1	0/1:1.26	0/0:2.14	0/1:1.0	0/1:1.16	0/0:1.84	0/0:1.98	0/1:1.14	0/0:2.04	0/0:2.12	0/1:1.06	0/0:1.82	0/0:1.74	0/0:2.06	0/0:2.2	0/1:0.94	0/0:1.44	0/0:2.04	0/1:1.08	0/0:2.0	0/0:2.24	0/0:1.86	0/0:1.98	0/0:1.9	0/0:1.96	0/0:1.98
17	70986501	-0.00959263	0.00187443	NPY2R(dist=271874),NONE(dist=NONE)	intergenic	17:70986501-70990500	CN0	0.763852	0/0:2.1	0/1:1.14	0/0:2.2	1/1:0.0	0/0:2.16	0/0:1.86	0/0:2.2	0/0:2.28	0/1:1.08	0/0:2.06	0/0:2.16	0/0:2.16	0/0:2.12	0/0:2.04	0/0:2.24	0/0:1.92	0/0:2.06	0/1:0.94	0/1:1.5	0/1:1.08	0/0:1.84	0/0:2.1	0/0:2.02	0/1:1.28	0/0:2.62	0/0:2.42	0/0:1.72	0/0:2.3	0/0:2.02	0/0:1.64	0/1:1.56	0/0:1.74	0/1:1.02	0/1:0.98	0/0:1.86	0/1:0.88	0/0:1.78	0/1:1.04	0/0:1.9	0/1:1.1	0/0:2.22
17	71038001	0.00492646	0.0202951	NPY2R(dist=323374),NONE(dist=NONE)	intergenic	17:71038001-71040500	CN0,CN2	0.681128	0/0:2.3	0/1:1.38	0/0:2.18	0/0:2.38	0/0:1.94	0/0:2.08	0/0:2.26	0/0:2.46	0/1:1.1	0/1:1.22	0/0:1.98	0/0:2.1	0/0:2.26	0/2:3.16	0/0:2.24	0/1:1.26	0/0:1.7	0/0:1.6	0/0:2.5	0/0:2.36	0/0:2.3	0/0:2.32	0/0:2.14	0/0:2.04	0/0:1.76	0/0:2.32	0/1:1.14	0/0:2.4	0/0:2.18	0/1:1.3	0/0:1.7	0/1:1.0	0/1:1.14	0/0:1.8	0/1:0.46	0/0:2.02	0/1:1.08	0/1:0.94	0/0:2.1	0/1:1.5	0/1:0.86
18	2003001	-0.00774785	-0.00222495	LOC102180550(dist=72046),LOC102172289(dist=250713)	intergenic	18:2003001-2008500	CN0	0.868094	0/1:1.16	1/1:0.14	0/1:1.14	0/0:2.0	0/1:1.12	0/0:1.9	0/0:2.08	0/1:1.26	1/1:0.04	0/0:2.06	0/1:1.3	0/0:1.88	1/1:0.02	0/0:1.9	0/1:1.22	0/1:1.12	1/1:0.06	0/0:2.08	1/1:0.22	0/1:1.28	0/1:1.06	0/1:1.22	0/0:2.12	0/1:1.04	0/0:2.26	0/0:2.36	1/1:0.06	0/1:1.08	0/0:2.2	0/1:1.02	0/1:1.06	0/0:1.78	0/0:2.04	0/1:1.26	0/0:2.18	0/0:2.08	0/0:2.36	0/0:2.22	0/1:1.26	0/0:1.98	0/1:1.02
18	2488001	0.0158506	0.00367938	LOC108637948(dist=23525),VSTM2B(dist=67400)	intergenic	18:2488001-2491500	CN0	0.791529	0/0:2.02	0/0:1.9	0/0:1.84	0/0:1.94	0/1:0.96	0/0:2.28	0/0:1.76	0/0:1.98	0/0:1.9	0/0:1.74	0/0:1.9	0/0:1.92	0/0:2.0	0/0:2.38	0/0:1.8	0/1:1.02	0/0:2.28	0/0:1.8	0/0:2.12	0/0:2.14	0/0:1.62	0/0:1.9	0/0:1.96	0/0:1.66	0/0:1.96	0/0:2.12	0/1:1.18	0/0:2.14	0/0:2.08	0/0:2.02	0/0:1.98	1/1:0.0	0/0:2.16	0/0:2.24	0/0:2.02	0/0:1.7	0/0:2.12	0/0:2.04	0/0:2.02	0/0:2.1	0/0:1.82
18	3144501	0.000186184	0.000797484	LOC106503078	exonic	18:3144501-3151500	CN2	0.753373	0/1:2.76	0/1:2.82	0/1:3.0	0/1:3.1	0/1:3.08	0/1:3.02	0/1:3.02	0/1:2.72	0/1:2.86	0/1:2.9	0/1:2.68	0/1:2.86	0/1:2.88	0/1:3.06	0/1:2.92	0/1:2.94	0/1:3.12	0/1:2.7	0/1:2.98	0/1:2.94	0/1:2.72	0/1:2.94	0/1:2.76	0/1:2.8	0/1:2.64	0/1:2.4	0/1:3.08	0/1:2.98	0/1:2.64	1/1:3.94	0/1:2.76	0/1:2.94	0/1:3.12	1/1:4.0	0/1:2.86	0/1:2.88	0/1:2.9	0/1:3.08	0/1:2.64	0/1:3.04	0/1:2.66
18	7937501	-0.00407542	-0.001913	LOC106504012	exonic	18:7937501-7967500	CN2,CNH	0.794706	1/1:3.82	0/1:2.96	1/1:3.7	1/1:3.68	1/1:4.1	1/1:3.56	1/1:3.88	1/1:3.94	1/1:3.88	1/1:3.76	0/1:2.78	1/1:3.64	1/1:3.86	1/1:4.26	1/1:4.12	1/1:4.0	1/1:3.86	1/1:4.06	1/1:3.9	1/1:4.0	1/1:3.68	1/1:4.0	1/1:3.92	1/1:3.82	1/1:3.94	1/1:3.82	1/1:3.64	0/1:2.82	1/1:3.92	1/1:4.02	1/1:3.8	1/1:3.82	1/1:4.18	1/1:3.88	1/2:4.88	1/1:3.56	1/1:3.8	1/1:3.74	1/2:4.9	1/1:3.9	1/1:3.9
18	12330501	0.00210759	0.0173178	USP10(dist=3736),CRISPLD2(dist=40383)	intergenic	18:12330501-12333500	CN2	0.703822	0/1:2.9	0/0:2.1	0/0:2.3	0/0:1.88	0/0:2.18	0/1:3.12	0/0:2.1	0/0:1.94	0/0:2.22	0/0:2.08	0/0:1.66	0/0:2.08	0/0:1.96	0/0:2.34	0/0:2.08	0/0:2.2	0/1:2.64	0/1:2.72	0/0:2.08	0/0:1.92	0/0:2.2	0/0:1.98	0/0:1.94	0/0:2.28	0/0:2.16	0/0:1.52	0/0:2.22	0/1:3.2	0/0:1.94	0/0:2.32	0/1:2.92	0/0:2.48	0/0:2.08	0/0:2.14	0/0:2.0	0/0:2.1	0/0:2.22	0/0:2.22	0/0:1.96	0/0:2.12	0/1:2.7
18	17045001	0.00164202	-0.00544817	LOC106503092(dist=148696),SALL1(dist=715041)	intergenic	18:17045001-17048500	CN0	0.697824	0/0:1.98	0/0:2.2	1/1:0.08	0/0:2.18	0/1:1.34	0/0:2.48	0/0:2.34	0/0:2.1	0/0:2.0	0/1:0.84	0/0:2.12	0/0:2.22	0/0:2.12	0/0:2.4	1/1:0.26	0/0:2.14	0/0:2.04	0/0:1.86	0/0:2.38	0/1:1.06	0/0:1.86	0/0:2.32	0/1:1.12	0/0:2.26	0/0:2.38	0/0:2.46	0/1:1.14	0/0:2.42	0/1:1.4	0/0:1.6	0/0:1.68	0/0:1.94	0/0:2.2	0/0:2.08	0/0:1.8	0/0:1.68	0/0:2.04	0/0:2.36	0/0:2.14	0/0:2.12	0/0:1.96
18	25349501	0.00722618	-0.00282031	LOC102188887	exonic	18:25349501-25390000	CN0,CN2	0.796626	0/0:2.12	0/0:2.02	0/1:1.12	0/0:2.16	0/0:2.06	0/0:2.12	0/0:1.96	0/0:2.08	1/1:0.18	0/0:1.98	0/0:2.04	0/0:1.98	0/0:2.02	0/0:2.2	0/0:2.0	0/1:1.08	0/0:2.06	0/0:2.0	0/0:2.02	0/0:1.9	0/0:2.02	0/0:2.14	0/0:1.96	0/0:1.96	0/0:2.0	0/0:2.02	0/0:2.06	0/0:2.02	0/0:2.1	0/0:2.32	0/0:2.14	0/0:2.28	0/0:2.08	0/0:2.12	0/0:2.08	0/0:2.14	0/0:2.18	0/0:2.1	0/0:2.06	0/0:2.24	0/0:2.06
18	26092501	-0.00489252	0.00317711	LOC102188340	exonic	18:26092501-26136000	CN2,CNH	0.858716	1/1:3.98	0/1:3.06	1/1:4.24	1/1:3.94	1/1:4.24	1/1:3.9	1/1:3.96	1/1:3.94	1/1:4.04	1/1:3.9	0/1:3.0	1/1:3.86	1/1:3.94	1/1:4.22	1/1:4.02	1/1:4.08	1/1:3.94	1/1:4.06	1/1:4.08	1/1:3.96	1/1:3.9	1/1:4.02	1/1:4.0	1/1:3.92	1/1:3.9	1/1:3.94	1/1:3.84	0/1:3.02	1/1:4.02	1/1:4.1	1/1:3.86	1/1:4.06	1/1:4.2	1/1:4.0	1/2:5.18	1/1:3.82	1/1:3.96	1/1:3.92	1/2:5.04	1/1:4.02	1/1:4.0
18	35653001	0.000638075	0.00228386	CMTM4	intronic	18:35653001-35658000	CN0	0.811628	0/0:1.92	0/0:1.98	0/0:1.92	0/0:2.22	0/1:1.14	0/1:1.16	0/0:1.78	0/0:2.1	0/1:1.08	0/0:1.92	0/0:2.12	0/0:1.94	0/0:2.06	0/0:1.98	0/0:2.1	0/0:1.96	0/0:2.22	0/0:1.84	0/0:1.9	0/0:1.98	0/0:1.66	0/0:2.02	0/0:1.92	0/0:2.0	0/0:2.0	0/0:1.82	0/0:1.78	0/1:0.88	0/0:1.98	0/0:2.0	0/1:0.96	0/0:1.94	1/1:0.0	0/1:1.06	0/1:1.1	0/1:1.16	0/1:0.92	1/1:0.0	0/0:2.0	0/1:0.88	0/1:1.2
18	40368001	-0.00966003	-0.00446978	PKD1L3	exonic	18:40368001-40372500	CN2	0.71411	0/0:2.0	0/0:2.06	1/1:3.96	0/1:3.3	0/1:2.86	0/0:2.34	1/1:3.74	0/1:2.76	0/1:2.76	0/1:2.88	1/1:3.9	0/0:2.06	0/0:2.12	0/1:3.28	0/0:1.9	0/0:2.12	0/1:3.2	0/0:1.76	0/1:2.78	1/1:4.02	0/0:1.86	1/1:3.66	0/1:3.2	0/0:2.0	0/1:3.0	1/1:3.92	1/1:4.26	0/0:2.42	0/1:2.7	0/0:2.18	0/1:3.04	1/1:4.12	1/1:3.72	1/1:4.0	1/1:3.76	1/1:4.22	1/1:4.1	1/1:4.02	1/1:3.86	1/1:4.24	1/1:3.68
18	42833501	-0.00731157	0.0194004	ZNF536(dist=441188),TSHZ3(dist=181863)	intergenic	18:42833501-42837500	CN0	0.69492	0/0:1.82	0/0:1.86	0/0:1.58	0/0:1.74	0/0:1.68	0/1:1.32	0/0:1.92	0/0:1.48	0/0:1.66	0/0:1.92	0/0:1.88	0/0:1.78	0/0:1.64	0/0:1.56	0/0:1.7	0/1:1.14	0/0:1.66	0/0:1.72	0/0:1.52	0/0:1.46	0/0:1.72	0/0:1.66	0/0:1.82	0/1:0.76	0/0:1.84	0/0:1.96	0/0:1.82	0/1:1.32	0/0:1.72	0/0:1.9	0/0:2.0	0/0:2.1	0/0:1.72	0/0:2.0	0/0:1.98	0/0:1.86	0/0:1.68	0/0:1.78	0/0:2.38	0/0:1.94	0/0:2.0
18	45495501	0.0625327	0.0295039	LOC102188164(dist=109438),LSM14A(dist=148487)	intergenic	18:45495501-45500000	CN0	0.910523	1/1:0.0	1/1:0.0	1/1:0.0	1/1:0.0	1/1:0.0	1/1:0.0	0/1:1.22	1/1:0.0	1/1:0.0	1/1:0.08	1/1:0.0	1/1:0.0	1/1:0.0	1/1:0.0	1/1:0.0	1/1:0.0	1/1:0.0	1/1:0.2	1/1:0.0	0/1:1.26	0/1:1.24	1/1:0.0	0/1:1.06	1/1:0.0	1/1:0.0	0/0:2.1	1/1:0.0	1/1:0.0	1/1:0.0	0/0:2.24	0/1:1.26	0/0:1.9	0/1:1.14	1/1:0.0	0/0:1.98	0/0:2.12	0/0:1.9	0/1:1.08	0/0:2.22	0/0:2.2	0/1:1.44
18	46144001	0.0033339	-0.00100387	LOC102191453(dist=26028),LOC108638112(dist=17013)	intergenic	18:46144001-46152000	CN0,CN2,CNH	0.739074	0/0:2.06	0/0:2.08	0/0:1.8	0/0:1.96	0/0:2.34	0/0:2.14	0/0:2.1	0/1:1.06	0/0:2.16	2/2:3.98	0/1:1.08	0/0:1.88	3/3:5.72	0/0:1.92	0/0:2.26	0/2:3.1	0/0:2.16	0/0:1.84	0/0:2.04	0/0:2.2	0/0:2.02	0/0:2.16	0/0:2.14	0/0:2.22	0/2:2.52	0/2:3.02	2/2:3.72	0/0:2.32	0/0:1.94	0/2:2.82	0/0:2.0	0/0:1.92	0/0:1.96	0/0:2.02	0/0:2.22	0/0:1.82	0/0:1.62	0/0:1.94	2/2:4.18	0/0:2.16	0/0:1.92
18	46237001	-0.00754074	-0.00252086	LOC102168380,LOC102169125,LOC102169411,LOC108637981	exonic	18:46237001-46297500	CN0,CN2,CNH	0.821734	0/0:1.96	0/0:2.12	0/0:2.1	0/0:2.04	0/0:2.2	0/0:2.02	0/0:2.12	0/1:1.14	0/0:2.06	2/2:4.0	0/1:1.12	0/0:2.02	3/3:5.78	0/0:2.14	0/0:2.18	0/2:2.94	0/0:2.0	0/0:2.08	0/0:2.08	0/0:1.96	0/0:1.94	0/0:2.06	0/0:2.04	0/0:2.18	0/2:3.2	0/2:3.08	2/2:3.9	0/0:2.16	0/0:2.1	0/2:2.8	0/1:1.44	0/0:1.96	0/0:2.22	0/1:1.44	0/0:2.1	0/0:1.96	0/0:2.02	0/0:2.06	2/2:3.72	0/0:2.12	0/0:2.02
18	47862501	-0.00994463	-0.00432413	ZNF260(dist=6919),ZNF260(dist=3130)	intergenic	18:47862501-47868000	CN0	0.817721	0/0:1.82	0/0:2.16	0/0:2.02	0/0:2.36	0/0:2.12	0/0:2.08	0/1:1.06	0/0:2.04	0/0:2.06	0/0:2.14	0/0:2.24	0/0:2.02	0/0:2.06	0/0:2.26	0/0:2.0	1/1:0.0	0/0:1.96	0/0:2.26	0/0:2.02	0/0:1.94	0/0:1.94	0/0:2.0	0/0:2.26	0/0:1.78	0/0:1.9	0/1:1.36	0/0:1.7	0/0:2.0	0/1:1.2	0/0:2.12	0/0:1.88	0/0:2.12	0/0:2.36	0/0:2.08	0/0:2.12	0/0:1.94	0/0:1.94	0/0:2.18	0/0:2.1	0/0:1.98	0/1:1.04
18	48344001	-0.00816517	-0.00348871	ZNF570(dist=3341),LOC106501765(dist=11500)	intergenic	18:48344001-48347000	CN0	0.778837	0/1:0.96	0/0:1.98	0/0:2.04	0/0:2.04	0/0:1.96	0/0:1.82	0/0:2.28	0/0:1.62	0/1:1.2	0/1:1.34	0/0:2.44	0/0:2.02	0/0:2.04	0/0:1.64	0/0:2.18	0/1:0.92	0/0:2.26	0/1:1.04	0/0:2.32	0/0:2.08	0/0:2.48	0/0:2.14	0/0:1.78	0/0:2.0	0/1:1.3	0/1:1.08	0/0:2.0	0/0:1.66	0/0:1.98	0/1:0.94	0/0:1.94	0/0:2.0	0/0:2.28	0/0:2.34	0/0:2.36	0/0:2.16	0/0:2.1	0/0:2.12	0/0:1.9	0/0:1.96	0/0:2.2
18	48572001	0.130775	0.0701186	LOC102176453	downstream	18:48572001-48576500	CN0	0.79763	0/0:2.04	1/1:0.0	0/1:0.78	0/0:1.9	0/1:1.06	0/0:1.8	0/0:2.12	0/0:1.8	0/0:1.9	0/1:1.22	0/1:0.92	0/1:1.08	0/0:2.1	0/0:1.78	0/0:2.06	0/0:2.1	0/1:0.58	0/0:1.92	0/0:1.78	0/0:2.18	0/1:1.08	0/0:2.2	0/0:2.02	0/1:1.06	0/0:1.96	0/1:1.04	0/1:1.06	0/1:0.92	0/1:0.76	0/0:1.8	0/0:2.14	0/0:1.8	0/0:2.2	0/0:2.24	0/0:1.58	0/0:1.94	0/0:2.04	0/0:2.04	0/0:2.02	0/0:1.96	0/0:2.04
18	50175501	-0.00887099	-0.00465661	LGALS15(dist=15622),LOC102184749(dist=2491)	intergenic	18:50175501-50190500	CN0	0.858625	1/1:0.26	0/1:1.22	0/0:2.08	1/1:0.28	0/1:1.48	0/1:1.18	1/1:0.2	0/0:2.14	0/0:2.1	0/0:2.0	0/0:2.04	0/1:1.12	0/0:2.06	0/0:1.96	0/1:1.32	0/0:2.0	0/1:1.26	0/1:1.16	0/1:1.24	0/1:1.42	1/1:0.18	0/0:2.08	0/0:2.06	0/1:1.34	0/1:1.1	0/0:2.16	1/1:0.18	0/1:1.16	1/1:0.14	0/1:1.2	1/1:0.32	0/1:1.12	1/1:0.3	0/0:2.12	0/1:1.1	1/1:0.32	0/1:1.08	1/1:0.26	0/1:1.2	1/1:0.2	1/1:0.2
18	51119501	0.0357461	0.0372013	LOC102169213	intronic	18:51119501-51127500	CN0	0.797943	0/0:2.26	0/1:0.98	0/1:0.94	0/1:1.04	0/0:2.56	0/0:2.1	0/0:2.38	0/0:2.42	0/0:2.24	0/0:2.0	0/1:1.28	0/0:2.18	0/0:2.28	0/0:2.28	0/1:1.3	0/0:2.18	0/0:2.24	0/1:1.2	0/1:1.36	0/0:2.2	0/1:1.06	0/0:2.32	0/0:2.36	0/0:2.12	0/0:2.54	0/0:2.58	0/0:1.86	0/0:1.86	0/0:2.1	0/1:1.0	0/0:2.08	0/0:1.72	1/1:0.0	0/1:1.0	0/1:1.2	0/1:0.98	0/1:0.92	0/1:1.06	0/0:2.24	0/1:1.12	0/1:0.86
18	51196501	0.00295493	0.00813842	LOC108633327	exonic	18:51196501-51201500	CN2,CNH	0.651258	0/0:2.1	0/1:3.02	0/0:2.18	0/1:3.36	0/0:2.3	0/1:2.76	0/0:2.18	0/0:2.32	0/0:2.18	0/1:3.16	0/0:1.9	0/0:1.96	0/0:2.04	0/0:1.5	0/0:2.36	0/1:3.6	0/0:2.04	0/0:2.12	0/0:2.14	0/1:2.86	0/1:2.74	0/0:1.94	0/0:1.94	0/1:2.98	0/0:2.08	0/1:2.82	0/0:2.02	0/1:2.96	0/0:2.12	1/1:4.1	0/0:2.46	0/1:3.54	1/2:5.3	1/1:4.08	1/1:4.28	1/1:3.86	0/1:3.7	0/0:2.26	0/1:2.8	1/1:4.38	1/1:3.94
18	51226501	-0.00219592	-0.00258941	LOC108638071	exonic	18:51226501-51294500	CN2,CNH	0.673612	0/0:1.9	0/1:2.6	0/0:1.86	0/1:2.78	0/0:1.86	0/0:1.76	0/0:1.72	0/0:1.88	0/0:1.86	0/1:2.76	0/0:1.84	0/0:1.78	0/0:1.8	0/0:2.04	0/0:1.8	0/1:3.54	0/0:1.76	0/0:1.76	0/0:1.58	0/1:2.72	0/1:2.66	0/0:1.92	0/0:1.8	0/1:2.84	0/0:1.94	0/1:2.66	0/0:1.82	0/1:2.82	0/0:1.84	1/1:3.62	0/1:2.64	0/1:3.22	1/1:3.8	0/1:3.48	1/1:3.72	0/1:3.44	0/1:3.46	0/0:1.86	0/1:2.78	1/1:3.64	0/1:2.86
18	52790501	0.0251891	0.0407223	LOC102183358	exonic	18:52790501-52826000	CN0,CN2,CNH	0.87904	0/2:3.2	0/0:2.2	0/2:3.26	0/0:2.24	2/2:4.42	0/0:2.38	0/0:2.18	0/2:3.44	0/2:3.2	0/0:2.12	0/1:1.3	0/2:3.1	0/0:2.16	0/2:3.5	0/0:2.28	0/2:3.26	0/1:1.26	0/0:2.36	0/2:3.22	0/2:3.18	0/0:2.14	0/2:3.22	1/1:0.08	0/1:1.42	0/2:3.24	0/1:1.28	0/0:2.1	0/1:1.22	0/0:2.26	0/0:2.36	0/1:1.22	0/0:2.34	1/1:0.1	0/0:2.12	0/0:2.22	1/1:0.04	1/1:0.08	0/1:1.26	0/1:1.32	1/1:0.1	0/0:2.14
18	55110501	-0.00722562	-0.000462453	ARHGAP35(dist=7731),NPAS1(dist=4372)	intergenic	18:55110501-55114000	CN0	0.711157	0/0:1.96	0/1:0.9	0/0:2.1	0/0:2.02	0/0:1.82	0/1:1.02	0/0:1.94	0/1:0.78	0/1:0.88	0/0:1.74	0/1:1.12	0/1:1.26	0/0:1.9	0/0:2.02	0/0:2.0	0/0:1.94	0/0:2.18	0/0:1.78	0/1:0.94	0/0:1.96	0/0:1.84	0/0:1.68	0/1:0.94	0/0:2.1	0/0:1.72	0/0:1.8	0/0:1.84	0/0:1.9	0/0:2.04	0/0:2.26	0/0:2.24	0/0:2.24	0/0:2.16	0/0:1.92	0/0:1.92	0/0:2.02	0/0:2.0	0/0:2.08	0/0:2.22	0/0:2.08	0/0:2.14
18	57684001	-0.00498414	-0.00220359	LOC108638009	exonic	18:57684001-57700500	CN2,CNH	0.690032	1/1:3.78	0/0:2.04	1/1:3.7	1/1:3.68	0/1:2.82	0/1:2.98	1/1:3.98	0/0:2.18	0/0:1.96	0/0:2.2	0/0:2.12	0/1:2.9	0/0:2.06	0/1:3.22	0/1:2.9	1/1:3.72	1/1:3.52	0/1:3.06	1/1:3.96	1/1:3.62	0/1:2.82	1/1:3.56	0/1:2.84	0/1:2.8	1/1:3.86	0/1:2.78	0/0:2.22	1/1:3.58	0/1:2.94	1/1:3.62	1/1:3.8	1/1:3.6	1/1:3.94	1/1:3.88	0/1:3.0	0/1:2.86	0/1:2.94	0/1:2.92	1/1:3.96	0/1:2.98	1/2:5.06
18	59825001	-0.00316515	-0.00112371	LOC108638013,LOC108638080	exonic	18:59825001-59965000	CN0,CN2,CNH	0.656507	0/0:2.44	0/0:2.34	0/0:2.44	0/1:1.5	0/2:2.96	0/0:2.42	2/2:3.94	0/0:2.44	0/0:2.38	0/2:2.92	0/2:2.64	0/0:1.94	0/0:2.42	0/2:3.32	0/0:2.44	0/0:2.46	0/0:2.42	0/0:1.76	0/2:2.68	0/0:2.5	0/0:2.38	0/1:1.48	0/0:2.4	0/0:2.48	0/0:2.52	0/2:2.58	0/0:2.4	0/0:2.46	0/0:2.52	0/0:2.34	0/0:2.3	0/0:2.3	0/0:2.46	0/0:2.46	0/1:1.42	0/1:1.42	0/1:1.34	0/1:1.44	0/0:2.48	0/0:2.54	2/2:4.34
18	59965501	-0.00379191	-0.00319139	LOC108638080	exonic	18:59965501-60008500	CN0,CN2,CNH	0.759718	0/0:2.24	0/2:3.26	0/0:2.2	0/0:2.36	0/0:2.3	0/0:2.28	0/0:2.3	0/0:2.26	0/1:1.12	0/0:2.2	0/2:2.52	0/0:2.32	0/0:2.24	0/2:2.48	0/0:2.22	0/0:2.24	0/0:2.28	0/1:1.36	0/0:2.28	0/0:2.32	0/0:2.18	2/2:4.5	0/0:2.26	0/0:2.16	0/2:2.62	0/0:2.24	0/0:2.26	0/0:2.3	0/0:2.32	0/2:3.02	0/0:2.28	0/0:2.36	0/0:2.3	0/2:3.42	0/0:2.34	0/2:3.38	0/0:2.32	0/2:2.82	0/0:2.44	0/0:2.34	0/0:2.3
18	60023501	-0.00647311	-0.0038543	LOC108638080(dist=51064),LOC108638024(dist=13236)	intergenic	18:60023501-60037000	CN2	0.685447	0/1:2.56	0/0:2.04	0/1:2.9	0/1:3.28	0/0:2.22	0/1:2.66	0/1:2.82	0/0:2.38	0/1:2.66	0/1:2.76	0/1:2.68	0/1:2.76	0/0:2.1	0/1:2.64	0/0:2.22	0/0:2.22	0/0:2.1	0/1:2.98	0/0:2.04	0/1:2.9	0/1:2.68	0/1:2.7	0/1:3.12	0/0:2.16	0/1:3.4	0/0:2.36	0/1:3.26	0/0:2.26	0/1:3.02	0/1:2.64	0/1:2.64	0/1:2.5	0/1:3.4	0/1:2.84	1/1:3.64	0/1:2.78	0/1:3.16	0/0:2.22	0/0:2.14	0/1:2.7	0/1:2.76
18	60206001	0.00387067	1.02842e-05	LOC108638022	exonic	18:60206001-60242500	CN2,CNH	0.748035	1/1:4.1	1/2:4.94	1/1:3.98	1/1:4.04	1/1:3.9	1/1:3.98	1/1:4.1	1/1:4.04	0/1:3.04	1/1:4.14	1/1:4.1	1/1:3.98	1/1:4.04	1/1:4.02	1/1:4.0	1/1:4.02	1/1:4.02	0/1:3.1	1/1:3.82	1/1:3.98	1/1:4.1	2/2:6.18	1/1:4.08	1/1:4.02	1/1:4.06	1/1:4.0	1/1:3.98	1/1:3.76	1/1:4.14	1/2:4.74	1/1:4.2	1/1:4.18	1/1:4.3	1/2:5.22	1/1:4.24	1/2:5.24	1/1:4.34	1/1:4.28	1/1:4.42	1/1:4.3	1/1:4.12
18	60623501	0.00483027	-0.00284581	LOC108638084	exonic	18:60623501-60737000	CN2,CNH	0.754712	1/1:3.98	1/2:4.7	1/1:4.04	1/1:3.94	1/1:3.92	1/1:4.02	1/1:4.12	1/1:4.1	0/1:3.02	1/1:3.82	1/1:3.84	1/1:3.88	1/1:3.94	1/1:4.06	1/1:4.02	1/1:3.88	1/1:4.04	0/1:3.16	1/1:3.96	1/1:4.06	1/1:3.88	2/2:5.82	1/1:4.0	1/1:3.86	1/1:4.12	1/1:3.88	1/1:3.92	1/1:3.8	1/1:3.96	1/1:4.46	1/1:3.86	1/1:3.72	1/1:3.98	1/2:4.72	1/1:4.04	1/2:4.62	1/1:3.76	1/1:4.08	1/1:4.12	1/1:3.98	1/1:4.26
18	62197501	-0.00937937	-0.00494712	LOC106503154	exonic	18:62197501-62216000	CN0,CN2	0.867793	0/0:2.14	0/1:0.96	0/0:1.84	0/0:2.14	0/0:2.04	0/0:2.04	0/0:2.04	0/0:1.98	0/0:1.98	0/1:1.14	0/0:2.12	0/1:1.02	1/1:0.02	0/0:2.14	0/0:2.04	0/0:2.04	0/0:2.0	0/0:2.04	0/0:2.12	0/0:2.22	0/0:2.06	0/0:2.06	0/0:2.04	0/0:2.1	0/0:2.14	0/0:2.16	0/0:2.1	0/0:1.96	0/0:2.18	0/0:2.16	0/0:2.06	0/0:2.1	0/0:2.14	0/0:2.0	0/0:2.22	0/0:2.0	0/0:2.1	0/0:2.16	0/0:2.04	0/0:2.14	0/0:2.0
18	62218001	-0.00930823	-0.00490699	LOC102174010,LOC106503154	exonic	18:62218001-62260500	CN0,CN2	0.864529	0/0:2.02	0/1:1.0	0/0:2.04	0/0:2.08	0/0:2.04	0/0:2.02	0/0:2.08	0/0:2.14	0/0:2.04	0/1:1.04	0/0:1.94	0/1:1.02	1/1:0.04	0/0:2.06	0/0:2.08	0/0:2.06	0/0:1.98	0/0:2.16	0/0:2.02	0/0:2.04	0/0:1.94	0/0:2.08	0/0:2.06	0/0:2.0	0/0:2.12	0/0:2.16	0/0:2.1	0/0:2.14	0/0:2.08	0/0:2.02	0/0:1.98	0/0:1.9	0/0:2.1	0/0:2.04	0/0:2.18	0/0:1.96	0/0:1.96	0/0:2.02	0/0:2.06	0/0:2.0	0/0:2.14
18	62522001	-0.0129159	-0.00472947	LOC108638087	exonic	18:62522001-62527500	CN2,CNH	0.66279	0/0:2.14	0/0:2.06	0/0:2.16	0/0:2.24	0/1:3.14	1/1:3.4	0/0:2.46	0/0:2.2	0/0:2.18	1/1:3.96	0/0:2.54	0/0:2.06	0/0:2.2	0/1:3.18	0/1:3.32	1/2:5.72	0/0:2.24	0/0:2.42	0/0:2.24	0/0:2.08	0/0:1.84	0/0:2.22	0/0:2.14	0/0:2.42	0/0:2.36	1/1:3.46	0/1:2.78	0/0:2.08	1/1:3.54	0/1:3.26	0/0:2.18	0/0:1.66	0/0:2.16	0/0:2.16	0/0:2.22	0/0:1.82	0/0:2.2	0/0:2.12	0/0:2.1	0/0:2.02	0/0:2.24
18	63036501	0.0354137	0.0207705	LOC102169897	exonic	18:63036501-63040000	CN0	0.763826	0/0:1.92	0/0:2.2	0/0:2.48	0/0:1.96	0/0:2.36	0/1:1.34	0/0:2.18	0/1:1.16	0/1:1.22	0/1:1.24	0/0:2.14	0/0:1.9	0/0:2.24	0/0:1.62	0/0:2.18	0/0:1.86	0/1:1.1	0/0:2.42	0/0:1.62	0/1:1.14	0/1:1.1	0/1:1.14	0/0:2.3	0/1:1.32	0/0:2.06	0/0:2.38	0/0:1.98	0/1:1.08	0/1:1.16	0/0:2.06	0/1:1.16	0/0:1.72	0/0:2.34	0/0:2.16	0/0:2.28	0/0:2.1	0/0:2.12	0/0:2.4	0/0:2.22	0/0:2.22	0/0:1.82
18	65410001	0.0181256	0.00236218	LOC102188437,LOC108638099	exonic	18:65410001-65417500	CN0,CN2	0.806269	0/0:2.08	0/1:1.02	0/1:1.0	0/0:1.92	0/1:1.1	0/0:2.22	0/1:1.2	0/0:2.18	1/1:0.02	0/0:2.06	0/1:1.12	0/0:1.96	0/0:2.14	0/0:2.04	0/0:1.98	0/1:1.0	0/1:0.9	0/0:1.98	0/1:1.22	0/1:1.0	0/1:1.16	0/0:1.86	0/0:2.1	1/1:0.18	0/0:1.94	0/1:0.74	0/0:1.9	0/0:1.9	0/0:1.74	0/0:2.48	0/0:2.0	0/0:1.68	0/0:2.04	0/0:1.98	0/0:2.1	0/0:2.2	0/0:1.68	0/0:2.06	0/0:2.0	0/2:2.98	0/0:2.1
19	6001	0.0176474	0.00468855	NONE(dist=NONE),CA10(dist=221988)	intergenic	19:6001-89000	CN0,CN2	0.852283	0/1:1.22	0/0:2.22	0/0:2.08	0/1:1.22	1/1:0.28	0/1:1.3	0/0:2.28	0/1:1.2	0/0:2.18	0/0:2.14	0/1:1.18	1/1:0.24	0/1:1.26	0/0:2.2	0/0:2.28	0/1:1.28	0/1:1.22	0/1:1.24	0/1:1.2	0/1:1.28	0/0:2.32	0/0:2.18	1/1:0.24	1/1:0.36	1/1:0.26	0/1:1.28	1/1:0.24	0/0:2.16	0/1:1.2	0/0:2.0	0/0:2.14	0/0:1.96	0/1:1.22	0/0:2.06	0/0:2.3	0/0:2.16	0/0:2.08	0/0:2.2	0/0:2.3	0/0:2.24	0/0:2.2
19	1576001	0.00280142	0.00408754	CA10(dist=430422),KIF2B(dist=1852498)	intergenic	19:1576001-1588500	CN0	0.871942	0/1:0.96	0/0:2.06	0/0:2.02	0/1:1.02	0/0:2.16	0/0:1.94	0/0:2.26	1/1:0.0	0/0:2.1	0/0:2.04	0/0:2.48	0/0:2.12	0/1:1.04	0/0:1.84	0/0:2.32	0/0:2.04	0/0:2.08	0/0:2.3	0/0:2.02	0/1:1.04	0/0:2.08	0/1:0.96	0/0:2.02	0/0:1.98	0/0:2.3	0/0:2.08	0/0:2.12	0/1:1.04	0/0:2.34	0/1:0.92	0/0:2.08	0/0:1.9	0/0:2.08	0/0:2.02	0/0:2.12	0/0:2.06	0/0:1.96	0/0:2.1	0/0:2.02	0/0:2.02	0/0:1.94
19	1589501	0.0017514	0.00494795	CA10(dist=443922),KIF2B(dist=1834998)	intergenic	19:1589501-1606000	CN0	0.888143	0/1:1.04	0/0:1.96	0/0:1.92	0/1:1.02	0/0:2.18	0/0:2.02	0/0:2.14	1/1:0.0	0/0:2.1	0/0:2.06	0/0:2.16	0/0:2.08	0/1:1.06	0/0:2.34	0/0:2.28	0/0:2.2	0/0:2.02	0/0:2.14	0/0:2.08	0/1:1.04	0/0:2.08	0/1:1.12	0/0:2.2	0/0:1.9	0/0:2.1	0/0:2.04	0/0:2.08	0/1:1.06	0/0:2.3	0/1:0.94	0/0:2.04	0/0:1.82	0/0:1.96	0/0:1.98	0/0:2.14	0/0:1.8	0/0:2.04	0/0:2.16	0/0:2.1	0/0:2.04	0/0:1.92
19	1667501	0.019581	0.00490827	CA10(dist=521922),KIF2B(dist=1762998)	intergenic	19:1667501-1678000	CN0	0.846828	0/0:2.06	0/1:1.0	1/1:0.0	0/0:2.06	0/1:1.0	0/0:1.82	0/1:1.06	0/0:1.64	1/1:0.0	0/1:1.18	0/0:2.1	0/1:1.16	0/1:1.06	0/0:1.8	0/0:2.34	1/1:0.0	0/0:2.02	0/1:1.06	0/1:1.12	0/1:1.26	0/1:1.02	0/0:2.2	0/1:1.02	0/1:0.92	0/1:1.06	0/1:1.04	0/0:1.94	0/0:1.92	0/0:2.16	0/0:1.86	0/0:1.96	0/0:1.98	0/0:2.0	0/0:2.1	0/0:1.88	0/0:1.94	0/0:1.82	0/0:1.9	0/1:1.1	0/1:1.08	0/0:2.0
19	1679501	0.0150572	-0.00299471	CA10(dist=533922),KIF2B(dist=1755498)	intergenic	19:1679501-1685500	CN0	0.763303	0/0:2.3	0/1:0.94	1/1:0.0	0/0:2.12	0/1:0.96	0/0:2.2	0/1:1.08	0/0:2.1	1/1:0.02	0/1:1.24	0/0:2.06	0/1:1.08	0/1:1.02	0/0:2.16	0/0:2.22	1/1:0.04	0/0:2.08	0/1:0.98	0/1:1.0	0/1:1.16	0/1:1.0	0/0:2.22	0/1:1.04	0/1:0.94	0/1:1.28	0/1:1.22	0/0:2.0	0/0:2.3	0/0:1.7	0/0:1.76	0/0:1.78	0/0:1.68	0/0:1.96	0/0:1.68	0/0:2.06	0/0:1.88	0/0:1.84	0/0:2.0	0/1:0.96	0/1:0.94	0/0:1.7
19	1687501	0.019581	0.00603692	CA10(dist=541922),KIF2B(dist=1693498)	intergenic	19:1687501-1747500	CN0	0.87005	0/0:1.96	0/1:1.08	1/1:0.14	0/0:1.84	0/1:1.14	0/0:2.0	0/1:1.18	0/0:1.94	1/1:0.16	0/1:1.1	0/0:2.0	0/1:0.98	0/1:1.04	0/0:1.94	0/0:2.22	1/1:0.18	0/0:1.86	0/1:1.0	0/1:0.88	0/1:1.22	0/1:1.14	0/0:2.04	0/1:1.1	0/1:0.94	0/1:1.14	0/1:1.18	0/0:2.0	0/0:1.96	0/0:1.92	0/0:1.76	0/0:1.94	0/0:1.8	0/0:2.0	0/0:1.94	0/0:1.94	0/0:1.9	0/0:1.76	0/0:2.02	0/1:1.12	0/1:1.04	0/0:1.88
19	1774001	-0.0013738	-0.00231899	CA10(dist=628422),KIF2B(dist=1664498)	intergenic	19:1774001-1776500	CN0	0.677002	0/1:1.3	0/1:1.26	0/1:1.02	0/1:1.44	0/1:1.4	0/0:2.1	0/1:1.36	0/1:1.1	0/1:1.0	0/1:1.12	0/1:1.56	0/1:1.28	0/1:1.14	0/1:1.18	0/1:1.38	0/1:1.02	0/1:1.04	0/1:1.06	0/1:1.18	0/1:1.48	0/0:1.92	0/0:1.7	0/1:1.48	0/1:1.26	0/1:1.46	0/1:1.4	0/1:1.22	0/1:1.48	0/1:0.88	0/1:0.86	0/1:1.34	0/1:1.14	0/1:1.4	0/1:1.2	0/1:1.02	0/1:1.28	0/1:0.98	0/1:1.18	0/1:1.34	0/1:1.38	0/1:0.86
19	1816001	-0.00814379	0.00158027	CA10(dist=670422),KIF2B(dist=1621998)	intergenic	19:1816001-1819000	CN0,CN2	0.70699	0/1:1.08	0/1:0.98	0/0:2.3	0/1:1.02	0/1:1.14	0/0:1.86	0/0:2.3	1/1:0.0	1/1:0.0	0/0:2.14	0/2:2.68	0/1:1.02	1/1:0.0	0/2:2.52	0/1:1.4	1/1:0.02	0/0:2.36	0/0:2.38	0/0:2.14	1/1:0.0	0/0:2.0	0/1:1.46	0/1:1.34	0/1:0.94	0/0:2.44	0/0:2.26	0/1:1.1	0/1:1.2	0/2:2.76	0/1:0.98	0/0:1.98	0/1:0.9	0/0:2.14	0/0:1.96	0/0:2.12	0/0:2.2	0/0:2.12	0/0:2.08	1/1:0.02	0/1:1.32	0/0:1.96
19	2230501	-0.00454235	-0.00301186	CA10(dist=1084922),KIF2B(dist=1198998)	intergenic	19:2230501-2242000	CN0	0.717448	0/0:2.0	0/1:1.28	0/1:1.08	0/0:1.84	0/1:1.38	0/0:2.02	0/0:2.12	0/1:1.3	0/1:1.22	0/0:1.78	0/0:1.92	0/0:1.98	0/0:1.98	0/1:1.22	0/1:1.38	0/1:0.5	0/0:1.76	0/0:1.98	0/0:1.56	0/1:1.26	0/0:2.08	0/1:1.38	0/0:2.06	0/0:1.78	0/0:2.08	0/0:2.04	0/0:2.04	0/0:2.04	0/0:1.92	0/1:1.18	0/0:1.8	0/1:0.46	0/1:0.48	0/0:1.9	0/0:1.96	0/0:1.92	0/0:1.92	0/1:1.18	0/1:0.54	0/0:1.94	0/0:2.04
19	2401001	-0.00906207	-0.0014297	CA10(dist=1255422),KIF2B(dist=1023498)	intergenic	19:2401001-2417500	CN0	0.838053	0/1:1.02	0/0:2.04	0/0:2.08	0/0:2.32	0/0:2.18	0/0:2.24	0/0:2.2	0/0:2.38	0/0:2.16	0/0:1.96	0/0:2.44	0/1:1.02	0/0:2.18	0/0:1.92	0/0:2.36	0/0:2.08	0/0:1.92	0/0:2.24	0/0:2.36	0/0:2.12	0/0:2.04	0/0:2.24	0/1:1.18	0/0:2.0	0/1:0.94	0/0:2.2	0/0:1.92	0/0:2.04	0/1:1.16	0/0:2.04	0/0:1.88	0/0:1.86	0/0:2.06	0/0:2.16	0/0:2.02	0/0:2.0	0/0:1.98	0/0:2.06	0/0:2.1	0/0:2.04	0/0:2.14
19	2460501	0.0408419	-0.00519671	CA10(dist=1314922),KIF2B(dist=977498)	intergenic	19:2460501-2463500	CN0	0.736663	0/0:1.94	0/0:1.96	0/0:1.92	0/0:2.36	0/1:1.04	0/1:1.12	0/1:1.1	0/0:2.1	0/0:2.06	0/0:1.96	0/0:1.92	0/0:1.98	0/0:2.18	0/1:1.22	0/1:1.22	0/0:2.0	0/0:2.3	0/0:1.98	0/0:2.06	0/0:2.46	0/0:2.3	0/0:2.1	0/0:2.16	0/1:1.38	0/0:1.94	0/1:1.24	0/0:2.16	0/1:1.06	0/0:2.02	0/0:1.9	0/0:2.0	0/0:1.96	0/0:2.18	1/1:0.04	0/1:0.92	0/0:1.92	0/0:1.96	0/0:2.1	0/0:1.94	0/0:1.96	0/0:2.16
19	3609001	0.00255011	0.00938735	KIF2B(dist=165775),LOC106503179(dist=878559)	intergenic	19:3609001-3612000	CN0	0.748632	0/1:1.22	0/0:2.2	0/0:1.96	0/0:2.2	0/1:1.28	0/0:2.2	0/0:2.22	0/0:2.1	0/0:1.84	0/0:2.32	0/1:1.38	0/0:2.06	0/1:1.12	0/0:1.86	0/0:1.82	0/1:1.16	0/0:2.28	0/0:1.92	0/0:2.16	1/1:0.02	0/1:1.1	0/0:2.08	0/0:2.34	0/1:1.12	0/0:2.02	0/1:0.94	0/0:1.98	0/0:1.76	0/0:2.8	0/0:1.7	1/1:0.0	0/1:1.02	0/1:1.08	1/1:0.0	0/1:1.3	0/0:1.78	0/1:0.86	0/0:2.02	0/1:1.08	0/1:1.0	1/1:0.0
19	5005001	-0.00904313	-0.00348314	STXBP4(dist=7147),HLF(dist=140005)	intergenic	19:5005001-5015500	CN0	0.841019	0/0:2.18	0/0:2.02	0/0:2.28	0/1:0.8	0/0:2.3	0/0:1.98	0/0:2.26	0/0:1.96	0/0:2.06	0/0:2.08	0/0:1.94	0/0:2.04	0/0:2.04	0/0:1.84	0/1:1.18	0/0:2.0	0/0:1.92	0/0:2.3	0/0:2.06	0/0:2.24	1/1:0.04	0/0:2.26	0/0:2.0	0/0:2.16	0/1:1.14	0/0:2.02	0/0:2.0	0/1:1.0	0/0:1.9	0/0:1.78	0/0:1.94	0/0:1.88	0/0:2.02	1/1:0.04	0/1:1.08	0/0:1.78	0/0:1.82	0/0:1.94	0/0:2.08	0/0:1.84	0/1:1.16
19	5742501	0.0129258	0.00877186	LOC102174834,LOC102180879	exonic	19:5742501-5847500	CN0,CN2,CNH	0.712552	0/2:3.3	0/2:3.42	0/2:3.38	0/2:3.34	2/2:3.82	0/2:3.32	0/2:3.52	2/2:3.74	0/2:3.28	0/2:3.44	0/2:3.5	0/2:3.46	0/2:3.46	2/2:4.18	2/2:3.74	0/2:3.44	0/2:3.36	0/2:3.36	0/2:3.2	0/2:3.36	0/2:3.4	0/2:3.48	0/2:3.46	0/2:3.32	2/2:3.62	0/2:3.52	0/2:3.44	0/2:3.32	2/2:3.56	0/0:2.5	0/2:3.2	0/0:2.28	0/0:2.38	0/1:1.42	0/0:2.32	0/1:1.4	2/2:3.78	2/2:4.4	0/2:3.46	0/1:1.46	0/2:3.16
19	8723001	0.0093965	0.0046671	LOC102186152	exonic	19:8723001-8727000	CN2	0.726907	0/0:1.84	0/0:1.86	0/0:1.56	0/0:1.74	0/0:1.96	0/0:2.16	0/1:3.04	0/0:2.22	0/0:1.98	0/0:1.94	0/0:1.9	0/0:1.7	0/0:2.1	0/0:2.06	0/0:2.08	0/0:2.02	0/0:1.8	0/0:1.98	0/0:1.64	0/1:2.96	0/0:2.06	0/0:1.96	0/0:1.96	0/0:1.7	0/0:1.46	0/0:2.02	0/0:1.78	0/0:1.58	0/0:1.8	0/0:2.04	0/0:1.98	0/0:1.88	0/0:1.84	1/1:3.72	0/0:1.72	0/0:1.88	0/0:2.04	0/0:1.76	0/0:2.1	0/0:1.86	0/0:2.14
19	8731001	0.0586731	0.012759	LOC102186152(dist=6470),LOC102186717(dist=5331)	intergenic	19:8731001-8745000	CN0	0.840114	0/0:1.98	0/0:2.14	0/1:1.08	0/1:1.04	0/0:2.36	0/1:1.12	0/0:2.18	0/1:1.22	0/1:1.14	0/0:1.86	0/0:2.44	0/0:2.08	1/1:0.02	0/0:2.16	0/0:2.42	0/1:1.08	0/0:2.14	1/1:0.0	0/0:2.1	0/1:1.14	0/1:0.96	0/0:2.1	0/0:2.14	0/0:1.98	0/1:1.12	0/1:1.1	0/1:1.16	0/0:2.14	0/0:2.12	0/0:2.04	0/1:0.86	0/0:1.74	0/1:1.1	1/1:0.0	0/1:1.08	0/0:1.96	0/1:0.96	0/0:2.16	0/0:2.06	0/0:1.94	0/1:1.02
19	9211501	-0.00703937	0.000498742	TEX14	intronic	19:9211501-9235500	CN2	0.692342	0/0:2.1	0/0:2.2	0/0:2.12	0/0:2.16	0/1:2.42	0/0:2.26	0/0:2.18	0/0:2.16	0/0:2.24	0/0:2.3	0/0:2.16	0/0:2.12	0/0:2.24	0/0:2.12	0/1:2.48	0/0:2.22	0/0:2.16	0/0:2.22	0/0:2.3	0/0:2.32	0/0:2.2	0/0:2.26	0/0:2.22	0/0:2.2	0/0:2.22	0/0:2.26	0/0:2.12	0/0:2.3	0/0:2.1	0/1:2.7	0/0:1.92	0/0:2.14	0/0:2.16	0/0:2.0	0/0:2.04	0/1:2.9	0/0:2.16	0/0:2.4	0/0:1.92	0/0:2.02	0/1:3.0
19	13849501	0.00752875	0.0237942	LOC102179130	exonic	19:13849501-13855000	CN0,CN2	0.744251	0/2:3.02	1/1:0.3	2/2:3.68	0/2:2.94	0/0:2.38	0/0:2.54	0/0:2.06	0/1:1.62	0/1:1.06	0/2:2.92	0/0:2.38	0/0:2.0	0/1:1.3	0/0:2.52	0/0:2.18	0/1:1.3	0/0:2.24	0/0:2.48	0/0:2.2	0/0:2.3	0/0:2.24	0/1:1.32	0/0:1.98	0/0:2.22	0/0:2.3	0/2:3.12	0/0:2.12	0/2:2.96	2/2:3.64	0/0:2.2	0/1:1.12	0/0:2.16	0/1:1.4	0/0:2.26	0/0:2.1	0/0:2.16	0/1:1.1	1/1:0.06	0/0:2.08	1/1:0.04	0/0:2.02
19	13947001	-0.00432768	0.00691427	LOC102180344	ncRNA_exonic	19:13947001-13966000	CN2,CNH	0.732984	1/1:3.96	0/0:2.18	1/1:4.04	0/1:3.0	1/2:4.38	1/1:4.14	1/2:4.9	1/2:4.74	1/1:4.16	1/1:3.84	1/1:3.94	0/1:2.94	0/0:1.98	0/1:3.32	0/0:2.3	0/1:3.14	0/1:3.26	1/1:4.0	1/1:4.22	1/1:4.1	0/1:2.98	0/0:2.18	0/1:2.86	0/1:2.96	1/1:4.04	1/1:3.84	1/1:4.16	0/1:3.1	1/1:3.86	0/1:2.88	0/1:2.82	0/1:2.82	0/1:3.1	0/0:2.0	1/1:4.18	0/0:2.0	0/0:1.9	0/0:2.1	0/1:3.08	0/1:2.96	0/1:2.9
19	23685501	-0.00451026	-0.00367337	LOC102182725(dist=8666),LOC102178764(dist=8974)	intergenic	19:23685501-23694000	CN0,CN2	0.738667	0/0:2.02	0/0:2.1	0/0:2.34	0/0:2.0	0/1:0.96	0/0:2.02	0/0:2.06	0/0:2.34	0/0:2.14	0/0:2.0	0/0:1.9	0/0:2.02	0/0:2.14	0/1:1.2	0/0:2.04	0/1:1.12	0/0:2.18	0/1:1.1	0/0:1.88	0/0:2.14	0/0:2.08	0/0:1.9	0/0:2.06	0/0:1.8	0/0:2.12	0/0:2.16	0/0:2.32	0/0:2.26	0/0:2.02	0/0:2.14	0/0:1.94	0/0:1.94	0/0:2.4	0/0:1.92	0/0:2.12	0/0:2.06	0/0:1.9	0/0:1.9	0/0:2.32	0/0:2.06	0/0:1.96
19	32641001	0.0343691	0.0276589	CDRT4(dist=17559),LOC102177467(dist=15807)	intergenic	19:32641001-32645500	CN0	0.817072	0/0:2.1	0/0:2.24	0/0:2.06	0/0:1.9	0/0:2.26	0/0:2.48	0/0:1.9	0/0:2.06	0/0:2.38	0/0:1.98	0/0:2.42	0/0:2.14	0/0:1.96	0/0:2.76	0/1:1.04	0/0:2.06	0/0:2.14	0/0:2.12	0/0:2.16	0/1:0.98	0/0:2.1	0/0:2.22	0/0:2.06	0/0:2.26	0/0:2.08	0/0:2.16	0/0:2.26	0/0:1.76	0/0:2.2	0/0:2.4	0/0:2.06	0/0:1.72	0/0:2.34	0/0:2.2	0/0:2.0	0/0:2.14	0/0:2.04	0/0:2.02	0/0:2.44	0/0:2.0	0/0:1.94
19	47847501	0.0805359	-0.00746219	LOC102178303,LOC108633333	exonic	19:47847501-47865500	CN0,CN2,CNH	0.762696	0/0:2.02	0/0:1.94	0/2:3.42	0/0:2.0	0/2:3.78	0/0:1.94	0/2:2.66	0/0:1.86	1/1:0.28	0/0:1.94	0/2:2.54	0/2:3.46	0/2:2.62	0/2:2.74	0/1:1.12	0/1:1.18	0/2:2.64	0/2:2.7	0/1:1.38	0/2:2.72	0/0:1.94	0/0:1.96	0/0:1.98	0/2:2.36	0/2:2.48	0/0:1.9	0/0:1.94	0/0:2.16	0/2:2.72	0/0:2.02	0/0:1.94	0/0:2.02	0/2:3.02	0/0:1.98	0/1:1.48	0/0:1.98	0/1:1.1	0/0:2.14	0/2:2.64	0/0:2.04	0/0:1.96
19	51575501	0.00673672	-0.00202366	RNF213	exonic	19:51575501-51581500	CN2	0.677815	0/0:2.04	0/0:2.22	1/1:3.66	0/0:2.22	0/1:2.9	0/1:3.02	0/1:3.02	0/1:2.8	1/1:3.82	1/1:3.78	0/0:2.24	0/0:1.88	0/1:3.0	0/0:2.16	1/1:3.78	1/1:3.94	0/1:3.24	0/0:2.1	0/1:2.7	0/1:2.92	0/0:2.08	0/1:2.68	1/1:3.6	0/0:2.38	0/0:2.36	0/1:2.92	0/1:3.02	0/1:3.08	0/1:2.8	0/0:2.22	0/0:2.08	1/1:3.5	0/0:2.32	0/1:2.84	0/0:2.18	0/0:2.16	0/0:1.98	0/0:1.88	0/0:2.14	0/0:2.02	0/0:2.0
19	57530501	0.00435182	-5.68238e-05	SLC39A11	intronic	19:57530501-57533500	CN0	0.81441	0/1:1.08	0/1:1.06	1/1:0.04	0/0:1.88	1/1:0.02	0/1:1.2	1/1:0.02	0/0:2.1	0/0:2.48	0/0:2.24	0/0:2.14	0/1:1.06	0/1:1.24	0/0:1.52	0/0:2.2	0/1:1.0	0/1:0.86	0/1:1.1	0/0:1.8	1/1:0.0	1/1:0.0	0/1:0.94	1/1:0.0	0/1:1.12	0/1:0.8	0/0:2.34	0/1:1.06	0/1:1.12	0/1:1.08	0/0:2.02	1/1:0.0	0/1:0.96	1/1:0.02	0/1:1.0	1/1:0.0	1/1:0.0	1/1:0.0	1/1:0.0	0/1:1.2	1/1:0.0	1/1:0.0
19	61990501	0.00842328	0.0143888	PRKCA	intronic	19:61990501-61996500	CN0,CN2	0.691371	0/0:2.06	0/0:2.04	0/0:1.72	0/0:2.1	0/0:2.04	0/0:2.04	0/1:1.04	0/1:1.06	0/0:2.14	0/0:1.98	0/0:2.1	0/0:1.96	0/0:1.94	0/2:2.7	0/0:1.92	0/0:2.0	0/0:2.18	0/0:2.18	0/0:2.3	0/1:1.16	0/1:1.04	0/0:1.98	0/0:1.96	0/1:1.24	0/1:0.96	0/0:1.76	0/0:1.98	0/0:1.86	0/0:2.34	0/0:2.08	0/0:2.04	0/0:1.84	0/0:2.32	0/0:2.02	0/0:2.0	0/0:2.04	0/0:1.9	0/0:2.14	0/0:2.16	0/0:2.08	0/0:1.96
2	2259501	0.0140111	0.0692211	TAS1R2(dist=7856),ALDH4A1(dist=1122)	intergenic	2:2259501-2262000	CN0	0.709276	0/1:0.9	0/1:1.02	0/1:0.92	0/1:1.08	0/1:0.94	0/1:1.16	0/1:0.96	0/0:1.8	0/1:0.58	0/1:0.78	0/1:1.14	0/1:0.98	0/1:0.88	0/1:1.26	0/1:1.16	0/1:0.64	0/1:1.26	0/1:0.92	0/1:0.8	0/0:1.66	0/1:0.66	0/1:0.7	0/1:0.86	0/1:0.66	0/1:1.22	0/0:2.1	0/1:0.86	0/1:1.02	0/1:1.2	0/1:0.72	0/1:0.68	0/1:1.1	0/1:0.58	0/1:0.9	0/1:0.84	0/1:0.58	0/1:0.92	0/1:0.66	0/1:1.14	0/1:0.98	0/1:1.04
2	3196501	-0.0026587	0.0116941	OTUD3(XM_018054901.1:c.*428_*4779delins0,XM_018054897.1:c.*428_*4779delins0)	UTR3	2:3196501-3201000	CN2	0.709248	0/0:1.94	0/0:2.24	0/0:2.28	0/0:1.86	0/0:2.12	0/0:2.14	0/0:1.9	0/1:2.52	0/0:2.0	0/0:2.34	0/0:2.24	0/0:2.28	0/0:1.96	0/0:2.16	0/0:2.18	0/0:2.14	0/0:2.04	0/1:2.46	0/1:2.6	0/0:2.1	0/0:2.12	0/0:2.04	0/0:2.02	0/0:2.08	0/0:2.04	0/0:2.14	0/1:2.5	0/0:2.3	0/0:1.96	0/0:2.2	0/0:2.16	0/0:2.16	0/0:2.26	0/0:2.06	0/0:2.3	0/0:1.78	0/0:2.2	0/0:2.34	0/0:2.06	0/0:2.26	0/0:2.2
2	3242001	-0.00952419	-0.00339536	PLA2G2E(dist=31760),LOC102170564(dist=9655)	intergenic	2:3242001-3247000	CN0	0.813603	0/1:1.28	0/0:2.08	1/1:0.0	0/1:1.28	1/1:0.0	0/0:2.14	0/1:1.16	0/1:1.4	0/1:0.9	0/0:1.92	0/1:1.0	0/1:1.06	0/0:1.94	0/1:1.26	1/1:0.02	0/0:2.36	0/0:2.04	0/0:1.94	0/1:1.06	0/1:1.64	0/1:1.12	0/1:1.08	0/0:2.18	0/1:1.28	0/1:1.54	0/0:2.2	0/1:1.16	0/1:1.26	0/1:1.16	1/1:0.0	1/1:0.0	1/1:0.0	1/1:0.0	1/1:0.0	1/1:0.0	1/1:0.0	1/1:0.0	1/1:0.0	0/1:0.94	1/1:0.0	0/0:2.26
2	3394001	0.139801	0.0812702	LOC102168673,LOC108633234	exonic	2:3394001-3432500	CN0,CN2,CNH	0.742583	2/3:5.26	0/0:2.16	0/0:2.4	2/3:4.54	0/2:3.76	0/0:2.48	2/3:5.4	3/3:6.14	0/2:3.34	2/3:4.46	2/3:4.5	0/0:2.22	3/3:6.36	2/2:4.26	0/0:2.4	0/0:2.22	0/0:2.34	2/2:4.3	2/3:5.34	2/3:5.38	0/0:2.06	0/2:3.34	3/3:6.24	2/2:4.04	0/2:3.66	0/0:2.56	0/0:2.3	2/3:5.44	0/2:3.46	0/0:2.36	0/2:3.1	0/0:1.88	0/0:2.38	0/0:2.2	0/0:2.32	0/2:3.02	0/0:1.94	0/0:2.34	0/0:2.2	0/2:3.16	0/2:3.2
2	12050501	0.0644144	0.0429402	PTPRU(dist=315856),TRNAC-GCA(dist=510280)	intergenic	2:12050501-12054000	CN0	0.66642	1/1:0.24	0/0:2.14	0/0:2.2	0/1:1.4	0/0:1.84	0/1:1.06	0/1:1.14	0/1:1.18	1/1:0.18	1/1:0.26	1/1:0.12	1/1:0.26	0/1:1.18	1/1:0.22	0/0:1.84	0/1:1.1	1/1:0.26	0/1:1.34	0/0:1.74	0/1:0.6	0/1:1.06	0/1:1.14	1/1:0.28	1/1:0.2	0/1:1.04	0/1:0.96	0/1:0.42	0/1:1.28	0/1:1.28	0/0:1.56	0/1:1.32	0/1:0.9	0/1:1.18	0/0:1.98	0/0:2.16	0/0:1.92	0/1:1.4	1/1:0.2	0/0:1.88	0/0:1.84	0/1:0.98
2	19819001	0.114934	0.0508847	LOC108638521	exonic	2:19819001-19843000	CN2,CNH	0.676943	0/0:2.36	0/0:1.62	0/0:2.44	0/0:1.54	0/0:2.56	0/1:2.9	0/0:2.44	0/0:2.52	0/1:3.18	0/0:1.62	0/0:1.8	2/2:5.78	0/1:3.06	0/0:2.46	0/0:1.56	0/1:3.24	0/1:3.22	0/1:3.16	0/0:2.26	1/1:4.12	0/0:2.2	0/0:1.58	0/0:2.36	0/1:3.36	1/2:5.28	0/0:2.5	0/1:3.26	0/1:3.06	0/0:1.44	1/2:5.2	0/1:3.16	0/1:3.22	0/0:2.6	0/1:3.1	0/0:2.68	0/0:2.5	0/0:2.28	0/1:3.1	0/1:3.16	1/2:5.32	0/1:3.2
2	31866501	0.292373	0.124956	MREG(dist=25103),FN1(dist=491490)	intergenic	2:31866501-31915500	CN2	0.928153	1/1:4.1	0/0:2.02	0/0:2.08	0/1:3.0	0/0:2.04	1/1:4.06	0/1:3.0	0/0:2.08	0/0:2.02	1/1:4.12	0/0:2.06	0/0:2.04	0/0:1.98	0/1:3.04	0/0:1.98	0/0:1.98	1/1:4.06	0/0:1.96	0/1:3.0	0/1:3.08	0/0:2.0	0/1:3.04	0/0:2.0	0/1:2.92	0/0:2.0	0/1:3.14	0/1:2.98	0/0:2.16	0/0:2.1	0/0:2.0	0/0:2.08	0/0:2.04	0/0:1.96	0/0:2.02	0/0:2.08	0/0:1.96	0/0:2.0	0/0:1.98	0/0:2.04	0/0:2.0	0/0:2.06
2	33632001	0.0126425	0.00412448	LOC102181821	intronic	2:33632001-33635000	CN0,CN2	0.65416	0/0:1.96	0/0:2.14	0/0:1.74	0/0:2.12	0/0:1.7	0/0:2.22	0/0:1.92	0/0:1.88	0/0:2.0	0/0:1.74	0/0:2.1	0/0:2.04	0/0:1.66	0/0:2.26	0/0:1.76	0/0:2.22	0/0:1.98	0/0:2.1	0/0:2.58	0/0:1.98	0/0:1.96	0/0:1.92	0/0:2.04	0/0:1.92	0/0:1.62	0/0:1.56	0/0:1.82	0/0:2.4	0/0:1.76	0/0:1.64	0/0:2.3	0/0:1.9	0/0:2.02	0/1:1.02	0/0:1.8	0/0:2.18	0/0:1.96	0/0:1.8	0/1:1.5	0/0:2.1	0/1:0.44
2	34511001	0.00416982	-0.00362361	LOC102181821(dist=3121),IKZF2(dist=131035)	intergenic	2:34511001-34524000	CN0	0.871981	0/1:1.02	0/0:1.94	0/0:2.08	0/0:2.22	0/0:2.32	0/0:2.18	0/1:1.1	0/1:1.16	0/0:2.06	0/0:2.12	0/1:1.24	0/1:1.06	1/1:0.04	0/0:2.14	0/1:1.1	0/1:1.12	0/0:2.14	0/0:2.0	0/1:1.02	0/0:2.3	0/0:1.98	0/0:1.96	1/1:0.08	0/0:1.94	1/1:0.04	0/1:1.06	0/1:1.1	1/1:0.0	0/1:1.06	0/0:1.74	0/0:1.88	0/0:1.78	0/0:2.18	0/1:1.02	0/0:2.06	0/1:1.06	0/0:1.94	0/0:2.08	0/0:2.06	0/0:1.9	0/0:2.02
2	38030501	0.0337337	0.0106961	KANSL1L,RPE	exonic	2:38030501-38034000	CN0,CN2	0.668676	0/0:2.22	0/0:2.16	0/0:1.62	0/0:2.3	0/0:2.0	0/0:1.6	0/2:2.82	0/2:3.16	0/0:1.8	0/0:2.18	0/0:1.88	0/2:2.7	0/2:2.86	0/0:2.54	0/0:1.78	0/2:3.04	0/0:2.2	0/2:3.18	0/0:2.24	0/0:2.22	0/0:2.06	0/0:2.02	0/2:2.96	0/2:3.4	0/2:2.74	0/0:1.78	0/2:2.86	2/2:4.48	0/0:1.58	0/0:2.0	0/0:1.98	0/0:2.1	0/0:2.0	0/0:2.08	0/0:1.96	0/0:2.1	0/0:2.26	0/0:2.04	0/0:1.98	0/0:2.24	0/1:0.9
2	39525501	0.0299279	0.00892044	CRYGC(dist=3629),LOC102188265(dist=5132)	intergenic	2:39525501-39528000	CN2	0.663506	0/0:2.04	0/0:2.0	0/0:2.14	0/0:2.24	0/0:2.18	0/1:3.4	0/0:2.06	0/1:3.0	0/0:1.96	0/1:2.6	0/0:2.06	0/0:2.14	0/0:2.1	0/1:3.28	0/0:2.18	0/0:2.08	0/1:2.84	0/1:2.8	0/0:1.8	0/0:2.22	0/0:2.0	0/0:2.28	0/0:1.92	0/0:2.02	0/1:2.72	0/0:2.5	0/0:2.0	0/1:2.78	0/0:2.36	0/0:2.2	0/0:2.22	0/0:2.18	0/0:2.36	0/0:1.96	0/0:2.06	0/0:2.12	0/0:1.86	0/0:1.94	0/0:2.22	0/0:2.2	0/0:1.3
2	45781001	-0.00816558	-0.00412162	ALS2CR11	intronic	2:45781001-45784000	CN0,CN2	0.751965	0/1:1.4	0/0:2.0	0/1:1.28	0/1:1.14	0/0:2.1	0/0:2.22	0/1:1.22	0/0:2.14	0/0:2.16	0/0:1.96	0/0:2.42	0/1:0.96	0/0:1.94	0/0:2.04	0/0:2.04	0/0:2.24	0/0:2.22	0/0:1.94	0/1:0.96	0/0:1.86	0/1:1.08	0/0:2.2	0/0:2.0	0/1:1.14	0/0:2.14	0/1:0.84	0/0:1.98	0/0:2.38	0/0:2.48	0/0:2.48	0/0:1.74	0/1:1.08	0/0:1.92	0/0:1.9	0/0:2.08	0/0:1.94	0/0:1.86	0/0:2.0	0/1:1.06	0/0:1.82	0/0:2.36
2	49324501	0.00760924	0.00377446	PLCL1	intronic	2:49324501-49327500	CN2	0.699884	0/0:2.08	0/0:1.98	0/0:2.06	0/0:2.2	0/0:2.22	0/0:1.76	0/0:1.9	0/0:1.98	0/0:1.98	0/0:1.66	0/0:2.08	0/0:2.24	0/0:2.02	0/0:2.12	0/0:2.02	0/0:2.14	0/0:1.9	0/0:1.58	0/0:1.98	0/0:1.68	0/0:2.16	0/0:1.94	0/0:2.28	0/0:2.16	0/0:2.14	0/0:1.7	0/0:2.0	0/0:2.32	0/0:2.1	0/0:2.14	0/0:1.94	0/0:2.06	0/0:1.72	0/0:2.16	0/0:1.94	0/0:1.98	0/0:2.16	0/0:2.14	0/0:2.1	0/0:1.84	0/0:2.26
2	51041001	-0.00685119	-0.00188747	HECW2	intronic	2:51041001-51043500	CN0,CN2,CNH	0.691028	0/0:1.96	0/0:2.42	0/2:2.74	0/0:2.16	0/0:2.22	0/1:1.02	0/0:2.28	0/2:2.84	1/1:0.18	0/0:1.72	0/0:2.48	0/1:1.02	0/0:2.36	0/0:1.92	0/0:1.9	0/0:1.94	0/1:1.36	0/1:1.38	0/0:1.8	0/1:1.0	0/1:1.08	1/1:0.14	0/0:2.16	0/0:1.7	0/0:2.5	0/0:2.52	0/0:2.22	0/0:2.18	0/0:1.7	0/0:2.22	0/1:1.08	0/0:1.88	0/0:1.9	0/1:1.18	0/0:1.92	0/0:1.9	0/0:1.96	0/0:2.22	0/0:2.22	0/0:2.02	0/1:1.0
2	53638001	0.0355891	0.029512	SLC39A10(dist=1915146),TMEFF2(dist=1482568)	intergenic	2:53638001-53641000	CN0	0.666028	0/0:2.1	0/0:2.08	0/0:1.54	0/0:2.6	0/0:1.72	0/0:2.06	0/0:2.04	0/0:1.58	0/0:1.86	0/1:1.04	0/0:1.56	0/1:1.12	0/0:1.96	0/0:2.32	0/0:2.14	0/0:2.16	0/0:1.54	0/0:2.4	0/0:2.04	0/1:1.32	0/0:2.12	0/1:1.24	0/0:1.96	0/0:1.98	0/0:1.68	0/0:2.5	0/0:2.34	0/0:2.02	0/1:1.32	0/0:1.78	0/0:1.98	0/0:1.92	0/0:1.96	0/0:1.86	0/0:1.88	0/0:1.92	0/0:2.0	0/0:1.82	0/0:1.9	0/0:2.02	0/1:1.24
2	55008001	0.0434104	0.0894793	NONE(dist=NONE),TMEFF2(dist=112068)	intergenic	2:55008001-55011500	CN0,CN2	0.675762	0/0:2.18	0/0:2.2	0/0:1.86	0/1:1.3	0/0:2.18	0/2:2.86	0/0:2.0	0/2:2.56	0/0:2.18	0/0:2.02	1/1:0.24	0/0:2.3	0/1:1.22	0/0:1.88	0/0:2.32	0/0:2.2	0/0:2.22	0/2:2.52	0/2:2.5	0/2:2.94	0/2:2.56	0/2:2.52	0/0:2.34	0/1:1.44	0/0:2.2	0/0:2.2	0/0:2.16	0/2:2.56	0/0:2.22	0/1:1.08	0/1:1.46	1/1:0.02	1/1:0.16	0/0:1.82	1/1:0.04	1/1:0.08	1/1:0.02	1/1:0.12	0/1:1.32	1/1:0.12	1/1:0.16
2	56735001	0.0719309	0.0335103	LOC108637892	ncRNA_exonic	2:56735001-56738500	CN0	0.751812	0/1:1.1	0/0:2.24	0/0:2.66	0/0:1.82	0/0:2.04	0/0:1.88	0/0:2.0	0/0:2.38	0/0:2.08	0/0:2.28	0/0:1.94	0/0:2.0	0/0:1.84	0/0:1.62	0/0:2.18	0/0:2.14	0/0:2.18	0/0:2.16	0/0:2.04	0/0:2.0	0/0:2.26	0/0:1.88	0/0:2.04	0/0:1.98	0/0:2.2	0/0:2.36	0/0:1.98	0/0:1.88	0/0:1.78	0/0:2.02	0/0:2.04	0/0:2.04	0/0:2.06	0/0:2.28	0/0:1.86	0/1:0.74	0/1:0.88	1/1:0.0	0/0:2.16	0/0:2.02	0/0:1.88
2	60774001	0.02292	0.0160216	CNTNAP5(dist=594384),TRNAC-GCA(dist=155379)	intergenic	2:60774001-60778000	CN2,CNH	0.691517	0/0:1.96	1/2:4.68	0/0:2.24	0/0:2.06	0/0:1.9	0/0:1.98	0/0:2.26	0/0:2.22	2/2:10.78	0/0:2.12	0/0:2.48	0/0:1.94	0/0:2.24	0/0:1.76	0/0:2.04	0/0:1.9	0/0:1.56	0/0:1.68	0/0:1.68	0/0:2.22	0/0:2.16	0/0:1.86	0/0:1.8	0/0:2.24	0/0:1.36	0/0:1.7	0/0:2.06	0/0:1.86	0/0:2.0	0/0:1.58	0/0:1.88	0/0:2.16	0/0:1.82	0/0:2.08	0/0:1.96	0/0:1.88	0/0:2.2	0/0:2.16	0/0:1.88	0/0:2.12	0/0:1.82
2	61388001	-0.00911376	-0.00325041	TRNAC-GCA(dist=454551),TRNAR-CCU(dist=68555)	intergenic	2:61388001-61393000	CN0,CN2	0.715637	0/0:2.32	0/0:1.98	0/0:2.12	0/0:1.86	0/0:1.82	0/0:2.32	0/0:2.0	0/0:1.8	1/1:0.02	0/0:2.16	0/1:1.3	0/0:2.06	0/0:2.04	0/0:2.02	0/0:2.12	0/0:2.18	0/0:1.82	0/0:2.28	0/0:1.56	0/0:1.96	0/0:2.06	0/0:2.22	0/0:2.08	0/0:1.94	0/1:1.1	0/0:2.04	0/0:2.02	0/0:2.36	0/0:2.04	0/0:1.88	0/1:0.94	0/0:2.18	0/0:1.88	0/1:0.98	0/1:1.08	1/1:0.0	0/1:0.98	1/1:0.0	0/0:1.9	0/0:1.9	0/0:1.86
2	62390501	0.0396352	0.0294321	TRNAQ-UUG(dist=6298),TSN(dist=312184)	intergenic	2:62390501-62394000	CN0,CN2	0.805282	1/1:0.2	1/1:0.14	0/1:1.08	0/2:2.48	0/2:2.62	0/1:1.34	0/1:1.22	0/2:2.4	1/1:0.12	1/1:0.36	0/1:1.1	0/2:2.56	0/0:2.24	1/1:0.08	0/1:1.36	1/1:0.1	0/1:1.34	1/1:0.18	0/1:1.16	1/1:0.34	0/1:1.12	0/1:1.32	1/1:0.3	0/1:1.28	1/1:0.18	0/0:1.6	1/1:0.16	1/1:0.42	0/1:0.84	1/1:0.16	0/1:1.24	1/1:0.26	0/1:1.16	1/1:0.18	1/1:0.28	1/1:0.08	0/1:1.2	0/1:1.06	1/1:0.18	1/1:0.18	1/1:0.36
2	65334001	-0.00770695	-0.00513286	C1QL2(dist=93719),MARCO(dist=40579)	intergenic	2:65334001-65338000	CN0	0.804154	0/0:2.18	0/0:2.14	1/1:0.0	0/0:2.16	0/0:2.28	0/0:1.82	0/0:2.14	0/0:1.96	1/1:0.04	0/0:2.22	0/0:2.0	0/1:1.14	0/1:1.08	0/1:1.2	0/0:2.24	0/0:1.98	0/0:1.9	0/0:2.22	0/1:1.22	0/1:1.48	0/0:2.14	0/0:2.02	0/0:2.04	0/0:2.1	1/1:0.0	0/0:1.88	0/1:1.0	0/0:2.04	0/0:1.84	0/0:1.96	0/0:1.96	0/0:2.04	0/0:1.94	0/0:1.9	0/0:2.06	0/0:1.8	0/0:2.08	0/0:1.9	0/0:2.38	0/0:1.76	0/0:1.92
2	67330001	0.0161507	0.016667	DDX18(dist=662177),DPP10(dist=1106737)	intergenic	2:67330001-67335500	CN0	0.792864	0/0:1.88	0/0:2.02	0/0:2.0	0/0:1.82	0/0:1.98	0/0:2.04	0/0:2.1	0/0:2.0	1/1:0.04	0/0:2.02	0/0:2.04	0/0:2.3	0/0:2.14	0/1:0.84	0/0:2.06	0/0:1.96	0/0:1.92	0/0:2.0	0/0:2.44	0/0:1.96	0/0:2.0	0/0:1.92	0/0:1.96	0/0:2.02	0/0:2.38	0/0:1.96	0/0:2.04	0/0:1.92	0/0:1.94	0/0:1.92	0/0:2.04	0/0:2.04	0/0:1.92	0/0:2.2	0/0:1.76	0/0:2.3	0/0:1.98	0/0:1.86	0/0:2.02	0/0:1.94	0/0:2.4
2	67723501	-0.00842857	-0.00304986	DDX18(dist=1055677),DPP10(dist=716237)	intergenic	2:67723501-67726000	CN0	0.78351	0/1:1.18	0/0:2.32	0/1:0.78	0/0:1.84	0/0:1.68	0/1:1.18	0/1:1.1	0/0:2.14	0/0:1.96	0/1:1.3	0/1:1.36	1/1:0.08	0/1:1.02	0/0:1.68	0/1:1.02	0/1:1.0	1/1:0.0	0/0:2.14	0/0:2.52	0/1:1.3	0/0:1.88	0/0:1.98	1/1:0.04	0/1:1.24	1/1:0.0	0/0:1.96	1/1:0.0	0/1:1.18	0/0:2.02	0/1:0.78	0/0:1.92	1/1:0.0	1/1:0.02	0/0:1.98	1/1:0.02	0/1:0.98	0/0:2.1	0/1:1.0	0/1:1.08	1/1:0.02	0/1:0.44
2	67755501	0.0218248	0.00565747	DDX18(dist=1087677),DPP10(dist=675737)	intergenic	2:67755501-67766500	CN0	0.863305	0/0:1.98	0/0:1.94	0/0:1.88	0/0:1.72	0/0:1.76	0/0:2.16	0/0:2.0	0/0:2.34	1/1:0.0	0/0:2.14	0/0:2.02	0/0:1.98	0/1:0.94	0/0:2.14	0/0:1.98	0/0:1.94	0/0:2.14	0/0:1.96	0/0:1.82	0/0:2.02	0/0:2.08	0/0:1.92	0/0:1.94	0/0:2.02	0/0:2.16	0/0:2.04	0/0:2.12	0/0:1.88	0/0:2.18	0/0:1.82	0/0:2.08	0/0:1.98	0/0:1.92	0/0:2.06	0/0:1.92	0/0:1.98	0/0:2.0	0/0:1.94	0/0:1.94	0/0:1.94	0/0:2.48
2	69396501	0.030409	0.0227449	DPP10(dist=182643),ACTR3(dist=1271760)	intergenic	2:69396501-69399000	CN0	0.7545	0/1:1.1	0/0:1.96	1/1:0.18	1/1:0.14	1/1:0.16	0/1:1.6	0/1:1.06	0/0:1.7	0/1:1.28	1/1:0.08	0/1:1.16	0/1:1.2	0/0:1.98	0/1:1.1	0/0:1.86	0/0:2.18	0/0:2.42	1/1:0.0	0/0:1.74	0/1:1.2	0/1:1.12	0/1:0.98	0/1:1.2	0/1:1.36	0/0:2.1	1/1:0.1	0/1:0.9	0/1:1.34	0/1:0.82	0/0:2.08	0/0:2.18	0/0:2.42	0/1:1.18	0/0:2.08	0/1:0.92	1/1:0.36	0/1:1.24	1/1:0.14	0/1:1.14	0/1:1.42	0/1:1.12
2	69932001	0.0862164	0.0143846	DPP10(dist=718143),ACTR3(dist=735760)	intergenic	2:69932001-69935000	CN2	0.657386	0/0:2.28	0/0:2.04	0/0:2.26	0/0:1.82	0/1:2.5	0/0:2.06	0/0:2.06	0/0:2.06	0/0:2.24	0/0:1.78	0/1:2.54	0/0:1.8	0/0:2.14	0/1:2.54	1/1:3.96	0/0:2.08	0/0:1.62	0/0:2.0	0/0:1.96	0/0:1.92	0/1:2.82	1/1:3.52	0/0:1.98	1/1:3.6	0/1:2.48	0/0:1.96	0/0:2.32	0/0:2.18	0/0:1.88	0/0:1.66	0/0:2.38	0/0:2.4	0/0:1.96	0/0:2.16	0/0:1.94	0/0:2.22	0/0:2.0	0/0:1.88	0/0:1.92	0/0:1.92	0/0:2.14
2	72552501	0.0798065	0.0362091	NCKAP5(dist=126763),MGAT5(dist=487536)	intergenic	2:72552501-72555500	CN0	0.773071	0/1:0.96	0/0:2.04	1/1:0.0	1/1:0.0	0/0:1.98	0/1:1.18	0/1:1.0	0/0:2.08	0/0:2.14	1/1:0.04	0/0:1.4	0/0:1.76	0/1:1.04	0/0:1.9	0/0:2.24	0/1:0.98	0/0:1.8	1/1:0.0	0/1:1.32	0/0:2.02	0/1:0.86	0/1:1.04	0/1:1.02	0/1:0.86	0/0:2.26	0/1:0.88	0/0:2.02	0/0:2.5	0/0:1.94	0/0:1.74	0/1:1.02	0/0:1.86	0/0:2.02	0/1:0.92	0/0:2.04	0/0:2.1	0/0:2.36	0/0:1.98	0/1:1.04	0/0:2.0	0/0:2.0
2	72702001	-0.00731157	-0.00358168	NCKAP5(dist=276263),MGAT5(dist=336536)	intergenic	2:72702001-72706500	CN0	0.780866	0/0:1.82	0/0:1.82	0/0:1.9	0/0:2.06	0/0:2.06	0/0:2.12	0/1:1.1	0/0:2.2	0/1:1.04	0/0:2.2	0/0:2.06	0/0:2.12	0/0:1.9	0/1:1.36	0/0:2.08	0/0:2.08	0/0:2.04	0/0:2.08	0/0:2.14	0/0:2.16	0/0:1.96	0/0:1.9	0/0:1.92	0/0:1.88	0/0:2.46	0/1:1.28	0/0:1.84	0/0:2.4	0/1:1.16	0/0:1.92	0/0:2.04	1/1:0.02	0/0:2.02	0/0:2.08	0/0:2.16	0/0:1.96	0/0:2.12	0/0:2.18	0/0:1.88	0/0:2.14	0/1:1.08
2	77133501	-0.00791844	0.00292043	HNMT(dist=50596),SPOPL(dist=478333)	intergenic	2:77133501-77137000	CN0,CN2	0.686324	0/0:2.26	0/0:1.88	0/0:2.02	0/1:1.16	0/1:1.14	0/0:1.84	0/0:2.18	0/0:1.96	0/1:1.1	0/0:1.78	0/1:1.5	0/0:2.12	0/0:1.98	0/1:1.06	0/0:2.12	0/0:2.14	0/0:1.92	0/1:1.66	0/0:2.32	0/0:1.9	0/0:2.04	0/0:1.98	0/0:2.06	0/0:2.24	0/0:2.14	0/1:1.12	0/0:2.12	0/1:1.4	0/0:2.38	0/0:1.96	0/0:2.08	0/0:2.3	0/0:1.88	0/0:1.82	0/0:1.9	0/0:2.46	0/0:2.22	0/0:2.0	0/0:2.12	0/0:2.26	0/0:2.04
2	79931501	-0.00759766	-0.00337663	LRP1B	intronic	2:79931501-79940000	CN0	0.820083	0/0:2.1	0/1:0.96	0/0:1.78	0/0:2.2	0/0:1.8	0/0:2.26	0/0:2.04	0/0:2.4	0/0:1.96	0/1:0.96	0/0:2.16	0/0:2.08	0/0:2.06	0/0:1.62	0/0:1.82	0/0:2.12	0/0:2.12	0/0:2.22	0/0:2.32	0/0:2.2	0/0:2.2	0/0:1.9	0/0:2.2	0/1:1.18	0/0:2.14	0/0:2.04	0/0:2.02	0/1:1.24	0/0:1.94	0/0:1.72	0/0:2.16	0/0:1.92	0/0:1.98	0/1:1.12	0/0:1.94	0/0:2.08	0/0:2.02	0/0:1.96	0/0:1.82	0/0:1.98	0/1:0.92
2	80269001	0.110403	0.0557732	LRP1B	intronic	2:80269001-80271500	CN0	0.808424	1/1:0.04	0/1:0.78	1/1:0.0	1/1:0.1	0/0:1.82	1/1:0.0	0/1:1.06	1/1:0.0	1/1:0.04	1/1:0.0	0/1:1.14	0/1:1.02	1/1:0.1	0/0:1.76	1/1:0.02	0/1:0.9	1/1:0.08	1/1:0.08	1/1:0.0	1/1:0.1	1/1:0.02	1/1:0.04	1/1:0.12	1/1:0.14	1/1:0.0	1/1:0.06	0/1:1.16	1/1:0.0	1/1:0.0	1/1:0.1	0/1:1.12	0/0:1.98	1/1:0.04	1/1:0.06	0/1:1.24	0/1:1.2	0/1:0.94	1/1:0.02	0/1:1.08	0/1:1.08	1/1:0.06
2	84091501	-0.00153746	0.0265937	ZEB2	intronic	2:84091501-84096500	CN2	0.653634	0/0:2.02	0/0:2.02	0/0:2.14	0/0:2.18	0/0:1.68	0/0:1.96	0/0:1.9	0/0:1.66	0/0:2.04	0/0:2.28	0/0:1.76	0/0:2.06	0/0:2.02	0/0:2.02	0/0:1.72	0/0:2.08	0/0:1.56	0/0:2.18	0/0:2.24	0/0:1.88	0/0:2.16	0/0:2.08	0/0:2.24	0/0:2.08	0/0:2.02	0/0:1.7	0/0:1.94	0/0:1.98	0/0:2.18	0/0:2.44	0/0:2.18	0/1:2.62	0/0:2.1	0/0:1.98	0/0:1.76	0/0:2.02	0/0:2.1	0/0:2.34	0/0:2.12	0/0:2.18	0/0:1.56
2	85094001	-0.00968365	-0.0030662	TRNAC-GCA(dist=772120),TRNAS-GGA(dist=1144721)	intergenic	2:85094001-85097000	CN0	0.788423	1/1:0.24	0/1:1.22	0/0:2.04	0/0:2.06	0/1:1.02	1/1:0.48	0/0:1.86	0/0:2.4	1/1:0.24	0/1:1.0	0/0:1.94	0/1:1.16	0/0:1.98	1/1:0.16	0/0:2.38	0/1:1.24	0/0:2.06	0/1:1.22	0/0:2.16	0/0:2.06	0/1:1.1	0/0:1.84	0/0:2.06	0/0:2.1	0/0:2.2	0/0:2.26	0/1:1.34	0/1:1.34	0/1:1.28	0/0:1.94	0/0:2.08	0/0:2.1	0/0:2.06	0/0:1.92	0/0:2.14	0/0:2.12	0/0:1.9	0/0:1.86	0/0:1.88	0/0:2.02	0/0:1.96
2	88168501	-0.0110077	-0.00332089	LOC106502907	ncRNA_intronic	2:88168501-88171000	CN2	0.661842	0/0:2.08	0/0:2.12	0/1:2.7	0/0:2.28	0/0:1.92	0/0:2.24	0/0:2.46	0/0:1.94	0/0:2.28	0/0:2.26	0/0:1.82	0/0:2.06	0/0:2.24	0/1:3.38	0/0:2.28	0/0:2.02	0/1:2.74	0/0:2.44	0/0:2.28	0/0:2.0	0/0:2.04	0/0:1.84	0/0:2.32	0/0:2.42	0/0:2.36	0/1:3.06	0/0:2.14	0/0:2.24	0/0:1.7	0/0:2.46	0/0:2.2	0/0:2.22	0/0:2.18	0/0:1.98	0/0:2.0	0/0:1.98	0/0:2.46	0/0:2.14	0/0:2.14	0/0:2.14	1/1:4.16
2	88631001	-0.0102738	-0.00280539	MBD5(dist=75133),EPC2(dist=67589)	intergenic	2:88631001-88637000	CN2	0.728854	0/0:2.16	0/0:2.16	0/0:1.94	0/0:2.24	0/0:2.2	0/0:2.32	0/1:2.84	0/0:2.1	0/0:2.02	0/0:2.06	0/1:2.66	0/1:2.56	0/1:2.8	0/0:2.16	0/0:1.92	0/0:2.32	0/0:1.96	0/0:2.18	0/0:1.94	0/0:2.4	0/0:1.9	0/0:2.14	0/0:2.12	0/0:2.2	0/0:2.4	0/0:1.86	0/0:2.0	0/0:2.04	0/0:1.98	0/0:2.04	0/0:2.04	0/0:2.24	0/0:2.04	0/0:2.02	0/0:2.18	0/0:2.0	0/0:2.04	0/0:2.02	0/0:2.08	0/0:2.16	0/0:2.04
2	88752501	0.0209385	0.0472791	EPC2	exonic	2:88752501-88759500	CN0,CN2	0.739494	0/0:2.18	0/0:2.08	0/1:1.1	0/1:1.28	0/0:2.2	0/0:1.82	0/0:2.04	0/0:2.04	0/0:2.04	0/0:2.12	0/0:1.86	0/1:1.44	0/0:2.1	0/0:2.08	0/0:2.04	0/0:2.02	0/0:2.0	0/0:1.9	0/0:1.98	0/0:2.32	0/1:1.4	0/0:1.96	0/0:2.1	0/1:1.46	0/0:2.34	0/1:0.52	0/1:1.54	0/0:1.9	0/0:2.02	0/0:2.24	0/0:2.1	0/0:2.28	0/0:2.12	0/0:2.18	0/0:2.18	0/0:2.12	0/0:2.12	0/0:2.02	0/0:2.38	0/0:2.2	0/0:2.44
2	89805001	-0.00777919	0.00320568	LOC102186638(dist=77608),LOC102185788(dist=345068)	intergenic	2:89805001-89807500	CN2	0.665315	0/0:2.02	0/0:2.02	0/1:2.78	0/0:2.5	0/0:2.12	0/1:3.12	0/0:1.92	0/0:1.94	0/0:2.36	0/0:2.44	0/0:1.92	0/0:2.04	0/0:2.1	0/0:2.66	0/0:2.0	0/0:1.9	0/1:2.96	0/0:2.44	0/1:2.86	0/0:2.4	0/0:2.16	0/0:2.1	0/0:2.0	0/0:2.14	0/0:2.2	0/0:2.26	0/0:2.52	0/1:2.76	0/1:2.98	0/1:3.06	0/0:1.94	0/0:2.2	0/0:1.76	0/0:2.0	0/0:2.02	0/0:1.98	0/0:2.32	0/0:2.14	0/0:1.82	0/0:2.06	0/0:1.6
2	95368501	0.0713279	0.0503085	LOC102174439(dist=170528),NR4A2(dist=874185)	intergenic	2:95368501-95374000	CN0,CN2	0.742278	0/0:1.98	0/0:1.9	0/1:1.22	0/0:1.9	0/0:1.86	0/0:1.94	0/1:1.0	0/1:1.34	0/0:1.98	0/0:2.12	0/1:0.96	0/0:2.0	0/0:2.06	0/0:2.08	0/1:0.9	0/0:1.82	0/0:2.08	0/0:1.76	0/1:0.74	0/0:2.4	0/0:2.22	0/0:2.04	0/1:1.04	0/0:1.94	0/0:1.92	0/1:1.36	0/1:1.2	0/1:0.9	0/0:2.1	0/0:1.96	0/0:2.1	0/0:2.08	0/0:2.04	0/0:2.18	0/0:2.02	0/0:2.1	0/0:1.96	0/0:2.16	0/0:2.2	0/0:1.9	0/2:2.94
2	101428501	0.0150068	0.00928827	SLC4A10	intronic	2:101428501-101431000	CN0,CN2	0.680226	0/0:2.12	0/0:2.24	0/0:2.5	0/0:1.54	0/0:2.18	0/0:1.76	0/0:2.4	0/0:1.66	0/0:2.14	0/0:2.34	0/0:1.82	0/0:1.9	0/0:2.16	0/0:2.28	0/0:2.4	0/0:2.16	0/0:1.72	0/0:2.3	0/0:1.58	0/0:2.14	0/0:1.96	0/0:2.22	0/0:2.24	0/0:2.16	0/0:2.14	0/0:1.96	0/0:1.94	0/0:2.06	0/0:2.02	0/0:1.84	0/0:1.88	0/0:1.94	0/1:0.98	0/0:2.1	0/0:2.06	0/0:2.34	0/0:1.84	0/0:1.96	0/0:2.42	0/0:1.8	0/2:3.24
2	105752001	-0.00328945	0.00392217	GALNT3(dist=9226),TTC21B(dist=106548)	intergenic	2:105752001-105760000	CN2	0.69185	0/0:2.08	0/0:2.22	0/0:2.34	0/1:2.6	0/0:2.22	0/0:2.44	0/0:2.1	0/0:2.46	0/0:2.22	0/0:2.14	0/0:2.32	0/0:2.3	0/0:2.22	0/1:3.16	0/0:2.24	0/0:2.1	0/1:2.54	0/0:2.18	0/0:2.3	0/0:2.34	0/0:2.22	0/0:2.24	0/0:2.1	0/0:2.14	0/0:2.32	0/0:2.14	0/0:2.42	0/0:2.4	0/1:2.62	0/0:2.16	0/0:2.02	0/0:2.2	0/0:2.16	0/0:2.24	0/0:2.22	0/0:2.06	0/0:2.3	0/0:2.06	0/0:2.02	0/0:2.1	0/0:1.8
2	105765001	-0.00328945	0.00623322	GALNT3(dist=22226),TTC21B(dist=93548)	intergenic	2:105765001-105773000	CN2	0.685422	0/0:2.08	0/0:2.22	0/0:2.34	0/1:2.62	0/0:2.22	0/0:2.48	0/0:2.1	0/0:2.5	0/0:2.22	0/0:2.16	0/0:2.34	0/0:2.3	0/0:2.22	0/1:3.16	0/0:2.24	0/0:2.1	0/1:2.56	0/0:2.2	0/0:2.32	0/0:2.36	0/0:2.22	0/0:2.26	0/0:2.12	0/0:2.14	0/0:2.34	0/0:2.14	0/0:2.44	0/0:2.44	0/1:2.64	0/0:2.16	0/0:2.02	0/0:2.2	0/0:2.16	0/0:2.24	0/0:2.22	0/0:2.06	0/0:2.3	0/0:2.06	0/0:2.02	0/0:2.1	0/0:1.82
2	106610501	0.0229944	0.0256913	SCN7A(dist=146395),XIRP2(dist=610949)	intergenic	2:106610501-106615500	CN0	0.765167	0/0:2.02	0/0:1.92	0/0:1.98	0/0:2.06	0/0:2.06	0/0:2.36	0/0:2.38	0/1:1.34	0/0:2.08	0/0:2.28	0/0:2.48	0/0:2.22	0/0:1.98	0/0:1.84	0/1:1.3	0/0:1.82	0/1:1.12	0/0:2.2	0/0:2.28	0/0:2.14	0/0:2.2	0/1:1.3	0/0:2.34	0/0:2.06	0/0:1.84	0/1:1.06	0/0:2.22	0/0:1.96	0/0:2.4	0/0:2.02	0/0:2.04	0/0:1.84	0/0:1.76	0/0:2.04	0/0:2.1	0/0:1.86	0/0:1.94	0/0:1.92	0/0:1.98	0/0:1.96	0/0:2.1
2	108064501	-0.000659187	-0.0014923	LOC108633447(dist=16012),STK39(dist=27244)	intergenic	2:108064501-108067500	CN0,CN2	0.65982	1/1:0.54	0/1:1.4	0/1:1.4	1/1:0.56	1/1:0.58	0/1:1.24	0/1:0.62	1/1:0.52	1/1:0.42	1/1:0.48	0/1:1.48	1/1:0.5	1/1:0.44	0/1:0.68	0/1:0.72	1/1:0.42	1/1:0.58	1/1:0.54	0/1:0.76	0/1:0.72	1/1:0.3	1/1:0.54	1/1:0.52	1/1:0.38	0/2:3.0	1/1:0.38	0/1:1.26	0/1:1.32	1/1:0.34	1/1:0.46	1/1:0.42	1/1:0.38	1/1:0.54	0/1:1.3	1/1:0.36	0/1:1.24	0/1:1.32	1/1:0.4	1/1:0.48	1/1:0.34	0/1:1.16
2	110221001	-0.00741568	0.0128485	MYO3B	intronic	2:110221001-110225000	CN2	0.709001	0/0:2.16	0/0:2.28	0/0:2.32	0/0:1.84	0/0:2.4	0/0:2.02	0/0:2.32	0/0:1.98	0/0:2.36	0/0:1.6	0/1:3.22	0/0:2.02	0/0:2.02	0/0:2.28	0/1:3.22	0/0:2.18	0/0:1.88	0/0:1.84	0/1:3.2	0/0:2.06	0/0:2.18	0/1:3.22	0/0:2.18	0/0:2.16	0/1:2.82	0/0:2.28	0/0:2.1	0/0:2.44	0/0:2.1	0/0:2.04	0/0:1.98	0/0:1.98	0/0:2.08	0/0:1.96	0/0:2.38	0/0:1.98	0/0:1.94	0/0:2.3	0/0:2.06	0/0:2.2	0/0:2.04
2	110514001	-0.00251867	-0.00148069	MYO3B	intronic	2:110514001-110517000	CN0	0.723538	0/1:1.36	1/1:0.42	0/1:0.64	0/0:2.2	0/1:1.04	0/1:1.48	0/1:1.28	0/0:1.5	0/1:1.22	0/1:1.38	0/1:1.14	1/1:0.4	0/1:1.14	0/0:1.6	1/1:0.4	0/0:2.0	1/1:0.54	1/1:0.46	0/1:1.24	0/0:2.16	0/1:1.24	0/1:1.24	0/1:1.36	0/0:1.82	1/1:0.44	0/1:1.26	0/1:0.62	0/1:1.16	0/1:1.34	1/1:0.38	0/0:1.52	0/0:1.78	0/0:1.92	0/0:2.14	0/0:1.84	0/0:1.74	0/0:2.1	0/0:2.0	0/1:1.42	0/1:1.44	0/1:1.16
2	127296001	-0.00181721	-0.00146209	ZSWIM2(dist=343159),CALCRL(dist=108422)	intergenic	2:127296001-127300500	CN0	0.766344	0/1:0.98	0/0:1.86	0/0:1.82	0/0:1.7	0/0:2.26	0/0:1.8	0/1:1.1	0/0:2.46	0/1:1.04	0/0:1.82	0/0:1.64	0/0:1.82	0/0:2.22	0/1:1.1	0/0:2.14	0/1:1.06	0/1:1.02	0/1:0.94	0/1:1.02	0/1:1.24	0/0:2.08	0/0:2.1	0/1:1.1	0/0:1.92	0/0:1.72	0/0:1.86	0/0:1.76	0/0:2.16	0/0:2.0	0/0:1.88	1/1:0.28	1/1:0.22	0/0:1.94	0/1:1.38	0/0:1.9	0/0:1.98	0/0:1.88	0/0:1.86	0/0:2.18	0/0:1.78	1/1:0.3
2	130103001	0.000581506	0.00327883	PMS1(dist=47192),TRNAE-UUC(dist=105657)	intergenic	2:130103001-130111000	CN0,CN2,CNH	0.743473	0/0:2.12	0/2:3.2	0/0:1.98	2/2:4.24	0/0:2.0	0/0:2.28	0/1:1.08	0/0:2.32	2/3:5.08	0/0:2.2	0/0:1.88	0/0:2.24	0/1:1.08	0/0:1.9	0/0:2.18	0/0:2.12	0/1:1.28	0/0:2.08	0/0:1.82	0/0:2.54	0/0:2.0	0/0:1.92	0/0:2.02	0/0:2.1	0/1:1.34	0/2:3.32	0/0:2.42	0/1:1.4	0/0:2.08	0/0:2.06	0/0:2.08	0/0:2.5	0/0:2.06	0/0:2.2	0/0:2.08	0/0:2.14	0/0:2.04	0/0:2.26	0/2:3.0	0/0:2.12	0/0:2.22
2	134276501	0.0432144	0.00704726	LOC102170001(dist=181910),PLEKHB2(dist=179164)	intergenic	2:134276501-134280500	CN0,CN2	0.77048	1/1:0.18	1/1:0.14	0/0:2.38	0/1:0.96	0/1:1.2	0/1:1.44	0/0:1.96	0/1:1.48	1/1:0.06	0/0:2.1	0/1:1.0	1/1:0.1	0/1:1.02	0/0:1.78	0/1:1.1	1/1:0.04	0/1:1.26	0/1:1.12	0/0:1.94	0/1:1.1	0/1:1.16	1/1:0.26	0/0:2.28	0/1:0.98	1/1:0.06	0/2:2.76	0/1:1.24	1/1:0.1	0/1:1.1	0/0:1.78	1/1:0.08	1/1:0.02	0/1:1.06	1/1:0.06	0/1:1.06	0/0:2.08	0/0:1.94	0/0:2.02	0/0:2.28	0/0:1.94	0/1:1.04
2	135140001	0.048066	0.0304478	AMER3(dist=87159),PTPN18(dist=48655)	intergenic	2:135140001-135144500	CN0	0.847674	0/1:1.1	1/1:0.06	0/0:2.2	0/1:1.04	0/0:2.24	0/1:1.22	0/0:2.12	0/1:1.22	0/1:1.24	1/1:0.12	1/1:0.16	0/0:2.16	0/1:1.1	0/0:2.66	0/0:2.16	0/1:1.0	0/1:1.22	0/1:1.54	0/0:2.42	0/1:1.38	0/0:1.88	0/0:2.3	1/1:0.18	1/1:0.26	1/1:0.18	0/0:2.56	1/1:0.22	0/1:1.16	0/0:2.42	0/1:1.06	0/0:1.88	0/1:1.0	0/0:2.28	1/1:0.08	1/1:0.16	1/1:0.1	1/1:0.12	1/1:0.28	1/1:0.12	1/1:0.12	0/0:1.8
2	136427001	0.00615167	-0.00491335	LGSN(dist=30659),NONE(dist=NONE)	intergenic	2:136427001-136431000	CN0,CN2	0.671864	0/1:1.16	0/0:2.06	0/0:1.82	0/1:1.4	0/0:2.4	0/0:1.98	0/0:2.1	0/0:2.4	0/0:2.0	0/0:2.1	1/1:0.0	0/1:1.24	0/0:2.18	0/2:2.66	0/2:2.54	0/0:2.0	0/0:2.26	0/1:1.4	0/0:1.66	0/1:1.3	0/0:2.24	0/0:2.12	0/0:2.06	1/1:0.36	0/0:1.92	0/0:2.12	0/1:0.9	0/1:1.38	0/0:2.26	0/0:2.04	0/0:2.08	0/0:1.82	0/0:1.88	0/0:1.88	0/0:2.28	0/0:1.74	0/0:2.22	0/0:2.1	0/0:2.26	0/0:2.02	0/0:2.26
20	9803001	0.00756394	0.00440312	MAP1B(dist=297674),CARTPT(dist=71860)	intergenic	20:9803001-9807500	CN2,CNH	0.662492	0/0:1.94	0/0:1.9	0/1:2.7	0/0:1.96	0/0:2.02	0/1:3.22	0/0:1.84	0/1:2.44	0/0:2.16	0/0:2.04	0/0:2.02	0/0:1.82	0/0:1.98	0/1:2.84	0/0:2.12	0/1:2.8	0/0:2.02	0/0:2.28	0/0:1.98	1/1:4.1	0/1:2.74	0/0:1.96	0/0:1.9	0/1:2.42	0/0:2.3	0/0:2.18	0/0:2.02	0/1:3.18	0/1:2.9	0/1:2.5	0/0:1.7	0/0:1.56	0/0:1.94	0/0:1.58	0/0:1.94	0/0:1.84	0/0:1.5	0/0:2.12	0/0:1.88	0/0:1.8	0/0:1.86
20	15098501	0.00606435	0.0121219	RNF180	intronic	20:15098501-15105000	CN0	0.823708	0/1:1.06	0/0:2.06	0/0:2.02	0/0:2.14	0/1:1.28	0/1:0.98	0/0:2.12	0/0:1.98	0/0:2.3	0/0:1.72	0/0:2.2	0/0:2.14	0/0:2.02	0/1:1.26	0/1:1.08	0/0:2.04	0/0:1.94	0/0:1.9	0/0:2.1	0/0:1.98	0/0:2.08	0/0:2.4	0/0:2.2	0/0:2.18	0/0:2.48	0/0:2.16	0/0:1.9	0/0:2.12	0/0:2.36	0/0:2.18	0/0:2.02	0/0:1.94	0/0:2.02	0/0:1.96	0/0:2.12	0/0:1.98	0/0:2.18	0/0:2.28	0/0:1.94	0/0:2.1	0/0:2.34
20	16447001	-0.000167023	-0.00342926	HTR1A(dist=870243),IPO11(dist=335208)	intergenic	20:16447001-16463500	CN0	0.904816	0/0:2.16	0/0:2.06	0/0:2.06	0/0:1.96	0/0:2.06	0/1:0.92	0/0:2.04	0/1:1.12	0/0:2.08	1/1:0.0	0/0:2.14	0/0:2.08	0/0:2.04	0/0:1.86	0/0:2.06	0/0:1.92	0/0:2.02	0/0:2.06	0/0:2.06	0/1:0.98	0/0:1.96	0/0:2.08	0/0:2.12	0/0:2.04	0/0:2.08	0/1:1.12	0/0:1.86	0/0:1.96	0/0:2.08	0/0:2.08	0/0:2.14	0/0:2.04	0/1:0.94	0/0:2.16	0/1:1.06	0/1:1.1	0/1:1.0	0/0:2.1	0/0:1.98	0/0:2.04	0/0:2.1
20	20508001	0.0528276	0.0190348	RAB3C	intronic	20:20508001-20515000	CN0,CN2	0.733176	0/0:1.86	0/1:1.04	0/0:1.98	0/1:0.98	0/0:2.44	0/1:1.2	1/1:0.0	0/1:1.28	0/1:1.06	0/0:2.06	0/0:2.22	0/1:1.08	0/0:1.98	0/0:2.0	0/1:0.92	0/1:1.2	1/1:0.04	0/0:1.92	0/0:2.2	0/0:2.32	0/0:2.0	0/0:1.98	0/0:1.9	0/1:0.96	0/0:2.04	0/2:2.62	0/0:2.0	0/0:2.2	0/0:2.24	0/0:2.0	0/0:2.0	0/0:2.04	0/0:2.08	0/0:2.0	0/0:2.06	0/0:1.94	0/0:2.2	0/0:2.1	0/0:2.18	0/0:1.94	0/0:2.16
20	21378001	0.040021	0.0334694	LOC102185395(dist=255039),TRNAC-GCA(dist=58898)	intergenic	20:21378001-21381500	CN0	0.74742	0/0:1.78	0/0:1.98	0/0:1.58	0/1:1.16	0/1:1.1	0/1:1.06	0/0:1.6	0/1:1.04	0/1:1.14	0/1:1.12	1/1:0.18	0/1:1.08	0/1:1.2	0/1:0.68	0/1:0.94	0/1:1.1	0/1:1.02	0/0:1.52	0/0:2.5	1/1:0.26	0/0:1.88	0/0:1.82	0/1:0.94	0/0:1.88	0/0:1.66	0/0:1.78	0/0:1.88	0/0:1.86	0/0:1.62	0/0:1.76	0/0:2.26	0/0:1.98	0/0:2.04	0/0:2.0	0/0:1.86	0/0:2.06	0/0:1.8	0/0:1.8	0/0:1.9	0/0:1.98	0/1:1.42
20	27154001	-0.0107114	-0.00393234	ITGA1(dist=830328),ISL1(dist=572302)	intergenic	20:27154001-27159000	CN0	0.881603	0/0:2.14	1/1:0.0	1/1:0.0	0/1:1.24	0/1:0.88	0/0:1.46	0/1:0.94	1/1:0.0	1/1:0.0	0/1:0.82	0/1:0.96	1/1:0.06	0/0:1.78	1/1:0.0	0/1:0.86	1/1:0.0	0/1:0.94	1/1:0.0	1/1:0.0	0/1:1.02	0/1:1.04	0/1:0.86	0/0:2.0	0/1:0.84	0/0:1.78	0/1:0.94	0/1:0.76	1/1:0.0	0/0:1.72	1/1:0.0	0/1:0.82	1/1:0.0	0/0:1.72	0/0:1.94	1/1:0.0	0/0:2.12	0/0:2.22	0/0:1.6	0/1:0.86	0/0:1.74	1/1:0.0
20	29890001	0.113972	0.0484293	TRNAC-GCA(dist=37725),MRPS30(dist=153443)	intergenic	20:29890001-29893500	CN0	0.829163	1/1:0.1	0/1:1.0	1/1:0.04	1/1:0.1	1/1:0.06	1/1:0.04	0/1:0.96	1/1:0.18	1/1:0.06	0/1:1.06	1/1:0.1	1/1:0.06	1/1:0.04	1/1:0.48	1/1:0.06	1/1:0.1	0/1:1.58	1/1:0.04	0/1:1.32	1/1:0.04	0/1:1.28	1/1:0.08	0/1:1.04	1/1:0.1	1/1:0.26	0/1:1.4	0/1:1.26	1/1:0.16	1/1:0.06	0/1:1.4	0/1:1.18	0/0:2.04	0/0:2.08	0/1:0.8	0/1:1.38	0/0:2.2	0/0:2.02	1/1:0.08	1/1:0.08	1/1:0.06	0/1:0.96
20	29936501	-0.00307588	0.000332529	TRNAC-GCA(dist=84225),MRPS30(dist=107443)	intergenic	20:29936501-29939500	CN0,CN2	0.66792	0/0:1.86	0/0:1.86	0/0:1.98	0/1:0.98	0/1:1.12	0/0:2.32	0/0:2.1	0/1:1.34	0/0:2.16	0/0:2.4	0/0:2.18	0/0:2.04	0/1:1.14	0/1:0.66	0/0:2.34	0/0:2.08	0/0:1.88	0/2:2.48	0/2:2.5	0/0:2.34	0/0:2.02	0/1:1.2	0/1:1.14	0/1:1.28	0/0:1.94	0/2:2.74	0/1:0.98	0/0:2.02	1/1:0.1	0/0:2.16	0/0:1.92	1/1:0.04	0/0:1.82	0/0:1.9	0/0:2.0	0/0:2.02	0/0:1.7	0/0:2.04	0/0:2.0	0/0:1.96	0/0:1.84
20	39639001	0.0143172	0.00692645	RAI14(dist=182349),C1QTNF3(dist=46808)	intergenic	20:39639001-39646000	CN0,CN2	0.804975	0/1:0.92	0/1:0.94	0/1:1.24	0/1:0.9	1/1:0.0	0/1:1.06	0/1:1.0	0/1:1.14	0/0:2.16	0/0:1.98	0/1:1.16	1/1:0.02	1/1:0.0	0/1:1.18	0/0:2.16	0/1:0.98	1/1:0.0	0/1:0.92	1/1:0.04	1/1:0.0	0/1:0.92	1/1:0.02	0/1:1.0	0/1:0.18	0/0:1.84	0/2:2.52	0/1:0.94	1/1:0.0	0/1:1.06	1/1:0.04	1/1:0.0	1/1:0.02	1/1:0.0	0/1:0.92	0/1:1.1	1/1:0.0	1/1:0.0	1/1:0.0	1/1:0.0	1/1:0.0	0/1:1.1
20	42073501	0.028066	0.0300056	DROSHA(dist=19503),CDH6(dist=60716)	intergenic	20:42073501-42076500	CN0,CN2	0.714177	0/0:2.16	0/0:1.98	0/0:1.6	0/0:1.9	0/0:2.06	0/0:2.14	0/0:1.94	0/0:2.06	0/0:2.14	0/1:1.38	0/0:2.36	0/0:2.32	0/0:1.88	0/0:2.22	0/0:1.94	0/1:1.16	0/0:2.24	0/0:2.36	0/0:2.42	0/0:2.16	0/0:2.06	0/0:2.18	0/0:2.18	0/0:1.88	0/0:2.04	0/0:2.04	0/0:2.12	0/0:2.1	0/0:1.84	0/0:1.98	0/0:2.46	0/0:1.64	0/0:2.04	0/0:1.6	0/0:2.34	0/0:1.86	0/0:2.24	0/0:1.88	0/0:1.9	0/0:2.12	0/0:1.98
20	43658501	-0.00574958	0.00196344	CDH6(dist=1370557),NONE(dist=NONE)	intergenic	20:43658501-43662000	CN0	0.768515	0/0:2.02	0/1:1.1	0/1:0.98	0/0:2.04	0/0:1.9	0/0:2.58	0/0:1.9	0/0:2.34	0/1:1.02	0/0:1.92	0/0:1.6	0/0:2.08	0/0:2.06	0/0:2.04	0/0:1.94	0/1:1.14	0/0:2.0	0/0:2.28	0/0:2.06	0/0:1.86	0/0:2.06	0/0:2.08	0/0:2.24	0/0:1.92	0/0:2.0	0/0:2.54	0/0:2.06	0/0:1.96	0/0:2.26	0/0:2.06	0/0:2.02	0/0:2.38	0/0:1.98	0/0:2.08	0/0:2.44	0/0:2.46	0/0:2.36	0/0:2.16	0/0:2.12	0/0:1.94	0/0:2.54
20	44913501	-0.00801835	-0.00358162	NONE(dist=NONE),CDH9(dist=1635084)	intergenic	20:44913501-44916000	CN0,CN2	0.785894	0/0:2.22	0/1:1.16	1/1:0.1	1/1:0.18	0/1:1.18	0/1:0.94	0/1:1.14	1/1:0.36	1/1:0.12	0/0:1.98	0/1:0.8	1/1:0.18	0/1:1.16	1/1:0.12	0/1:1.14	1/1:0.14	0/1:1.44	0/1:0.78	1/1:0.18	1/1:0.34	1/1:0.08	1/1:0.28	1/1:0.26	1/1:0.14	0/1:0.98	0/1:1.08	0/1:0.98	1/1:0.24	1/1:0.22	0/0:1.88	1/1:0.1	1/1:0.06	1/1:0.16	1/1:0.18	1/1:0.1	1/1:0.18	1/1:0.16	1/1:0.1	1/1:0.06	1/1:0.14	1/1:0.34
20	44918001	-0.00695833	-0.00310708	NONE(dist=NONE),CDH9(dist=1629584)	intergenic	20:44918001-44921500	CN0	0.888013	0/0:1.86	0/1:1.06	1/1:0.0	1/1:0.04	0/1:0.82	0/1:1.0	0/1:1.04	1/1:0.04	1/1:0.08	0/0:2.34	0/1:1.16	1/1:0.02	0/1:0.98	1/1:0.0	0/1:1.04	1/1:0.0	0/1:1.32	1/1:0.0	1/1:0.1	1/1:0.04	1/1:0.0	1/1:0.04	1/1:0.02	1/1:0.02	0/1:0.94	0/1:0.84	0/1:0.86	1/1:0.08	1/1:0.08	0/0:1.76	1/1:0.0	1/1:0.14	1/1:0.02	1/1:0.04	1/1:0.02	1/1:0.1	1/1:0.04	1/1:0.04	1/1:0.1	1/1:0.04	1/1:0.02
20	47893001	0.000816416	0.0045428	CDH9(dist=1203438),LOC102187166(dist=470920)	intergenic	20:47893001-47899000	CN0	0.824673	0/0:2.18	0/1:1.02	0/1:1.16	0/0:2.12	0/0:1.96	0/0:2.38	0/0:2.06	0/0:2.3	0/1:0.88	0/0:2.14	0/0:1.96	0/0:2.08	0/0:2.02	0/0:1.96	0/0:2.0	0/1:1.18	0/1:0.86	0/0:1.9	0/1:1.38	0/0:1.76	0/0:2.24	0/0:1.98	0/1:1.06	0/0:2.0	0/0:2.16	0/0:1.94	0/0:1.98	0/0:1.88	0/0:2.22	0/0:2.06	0/1:1.08	0/0:2.14	0/1:1.06	0/1:1.22	1/1:0.02	0/1:1.04	1/1:0.0	0/0:2.02	0/0:1.84	0/1:0.98	0/0:2.02
20	49632501	-0.00449399	-0.00386882	LOC102187435(dist=670201),LOC102187988(dist=895793)	intergenic	20:49632501-49638500	CN0	0.749767	0/0:1.78	0/0:1.82	0/0:1.68	0/0:1.74	0/0:1.82	0/0:2.12	0/0:1.98	0/0:2.0	0/0:1.9	0/0:1.82	0/0:1.8	0/0:1.88	0/0:2.0	0/0:2.04	0/0:1.84	0/0:1.96	0/1:1.18	0/0:2.04	0/0:2.32	0/0:1.86	0/0:2.02	0/0:1.92	0/0:1.9	0/0:2.14	0/0:1.94	0/0:1.76	0/0:2.02	0/0:2.12	0/0:2.08	0/0:1.68	0/0:2.02	0/0:1.8	0/0:1.76	0/0:2.14	0/0:1.9	0/0:2.1	0/0:2.06	0/0:1.98	0/0:1.92	0/0:2.1	0/0:2.36
20	55130501	0.0588612	0.023673	TRNAS-GGA(dist=849146),TRNAS-GCU(dist=114179)	intergenic	20:55130501-55135500	CN2,CNH	0.765097	0/1:2.82	0/1:2.78	0/0:2.14	0/0:1.7	1/1:3.6	1/1:3.62	0/1:2.96	0/0:1.6	0/0:1.82	1/1:3.4	0/0:2.48	0/0:2.04	1/2:4.96	0/0:1.98	0/0:1.88	0/1:2.98	0/1:2.9	1/1:3.9	0/0:2.08	0/0:1.78	0/0:2.02	1/2:5.06	0/0:1.94	0/0:1.9	0/0:1.94	0/1:2.9	0/0:2.04	0/1:3.2	0/0:1.56	0/0:2.0	0/0:1.9	0/0:1.72	0/0:1.86	0/0:2.16	0/0:2.26	0/0:1.9	0/0:1.94	0/0:1.86	0/0:1.78	0/0:2.1	0/0:2.14
20	55435001	0.026232	0.0280104	TRNAS-GCU(dist=185241),BASP1(dist=399061)	intergenic	20:55435001-55439000	CN0,CN2	0.691941	0/0:2.08	0/0:2.18	0/1:0.86	0/1:0.8	0/0:1.64	0/0:2.06	0/0:2.0	0/2:2.62	0/0:1.82	0/0:2.22	0/0:1.86	0/0:2.14	0/0:1.96	0/0:2.14	0/0:2.02	0/0:1.94	0/0:2.42	0/0:2.04	0/0:1.78	0/2:2.7	0/0:2.12	0/0:2.08	0/0:2.0	0/0:1.76	0/0:1.6	0/1:1.04	0/0:1.92	0/0:2.06	0/0:2.06	0/0:1.78	0/0:2.08	0/0:1.92	0/0:2.06	0/1:0.94	0/1:0.9	0/0:1.88	0/1:0.86	0/0:1.9	0/1:0.64	0/0:2.06	0/0:1.42
20	57303001	1.16662e-05	0.0292152	FBXL7	intronic	20:57303001-57305500	CN0	0.692143	0/1:1.14	0/1:1.14	0/1:0.64	0/1:1.14	0/1:1.18	0/0:1.54	0/1:1.08	0/1:0.74	0/1:0.9	0/1:1.1	0/1:0.7	0/1:1.18	0/1:0.98	0/1:1.34	0/1:0.9	0/1:0.82	0/1:0.92	0/1:0.46	0/1:0.96	0/1:0.62	0/1:1.02	0/1:0.98	0/1:1.02	0/1:0.98	0/1:0.84	0/1:0.78	0/1:1.0	0/1:1.08	0/1:0.76	0/1:1.44	0/1:1.12	0/1:0.98	0/1:1.2	0/1:1.02	0/1:1.22	0/1:1.2	0/1:0.84	0/1:0.9	0/1:0.98	0/1:1.02	0/1:1.28
20	59385001	0.146649	0.0503456	DNAH5	intronic	20:59385001-59391000	CN0	0.796197	0/1:0.98	0/0:2.2	0/1:1.32	0/0:2.14	0/0:2.24	0/0:2.22	0/0:2.14	0/1:1.24	0/0:2.04	1/1:0.1	0/1:0.94	0/1:0.96	1/1:0.08	0/1:1.28	0/1:1.16	0/1:1.1	0/1:1.0	0/1:1.4	0/1:1.12	0/1:1.14	0/1:1.1	0/1:1.1	0/0:2.32	1/1:0.3	0/1:1.36	0/0:1.86	0/1:1.14	0/0:2.34	0/1:1.2	0/0:1.94	0/0:2.1	0/1:1.0	0/1:0.98	0/1:1.02	0/0:2.26	0/1:1.04	0/0:1.78	0/1:1.12	0/0:1.9	0/1:1.02	0/0:2.18
20	60302501	0.0799469	0.0751866	DNAH5(dist=904162),CTNND2(dist=782725)	intergenic	20:60302501-60446500	CN0	0.802262	0/0:2.36	0/0:2.34	0/0:2.28	0/0:2.44	0/0:2.64	0/0:2.26	0/0:2.34	0/0:2.26	0/0:2.52	0/0:2.2	0/0:2.62	0/0:2.34	0/0:2.4	0/0:2.44	0/0:2.5	0/0:2.3	0/0:2.42	0/0:2.38	0/0:2.18	0/0:2.58	0/0:2.5	0/0:2.26	0/0:2.5	0/0:2.36	0/0:2.54	0/0:2.4	0/0:1.64	0/0:2.24	0/0:2.36	0/0:1.94	0/0:2.14	0/0:1.92	0/0:1.8	0/0:2.14	0/0:2.28	0/0:2.2	0/0:2.08	0/0:2.24	0/0:2.3	0/0:2.2	0/0:2.08
20	60757501	-0.00993024	-0.00445904	DNAH5(dist=1359162),CTNND2(dist=462725)	intergenic	20:60757501-60766500	CN0	0.830989	0/0:1.94	0/1:1.18	0/0:1.84	0/0:2.2	0/0:1.92	0/0:1.86	0/0:2.02	0/1:1.14	0/0:1.94	0/0:2.3	0/0:2.12	0/0:2.02	0/0:2.16	0/0:1.7	0/0:2.02	0/1:1.1	0/0:2.02	0/0:2.1	0/0:2.24	0/0:2.06	0/0:2.22	0/0:1.96	0/0:2.22	0/0:1.9	0/0:2.2	0/0:1.96	0/0:1.9	0/0:1.96	0/0:1.8	0/0:1.98	0/0:1.86	0/0:1.68	0/0:2.14	0/1:1.04	0/0:1.84	0/0:2.1	0/0:2.12	0/1:0.78	0/0:2.0	0/0:2.02	0/1:1.12
20	61633501	-0.0088921	-0.00204267	CTNND2	intronic	20:61633501-61638500	CN0	0.806312	0/1:1.04	0/1:1.26	0/1:1.24	0/0:2.0	0/1:0.96	0/0:1.84	0/0:1.92	0/1:1.1	0/1:1.16	0/1:1.12	0/0:1.92	0/1:1.2	1/1:0.06	0/0:2.42	0/1:1.38	0/1:1.28	0/1:1.26	0/0:1.96	0/1:1.18	0/1:1.14	0/0:2.06	0/1:1.24	0/0:2.06	1/1:0.22	0/0:1.96	0/1:1.1	1/1:0.0	0/0:1.72	0/0:1.88	0/1:1.1	0/0:1.98	0/1:0.78	0/0:2.2	0/0:2.04	0/0:2.04	0/0:1.96	0/0:1.76	0/0:1.82	0/1:1.1	0/1:1.12	0/1:1.22
20	66976001	-0.00572675	0.00930122	MED10(dist=190681),ICE1(dist=640514)	intergenic	20:66976001-66978500	CN0,CN2	0.651912	0/1:1.0	0/0:2.18	0/0:1.48	0/0:2.32	0/1:1.3	0/0:2.7	0/0:2.14	0/0:1.52	0/0:2.22	0/0:2.24	0/0:2.02	0/1:1.36	0/0:2.12	0/0:2.58	0/0:2.12	0/1:1.22	0/1:0.94	0/2:3.04	0/0:2.48	0/0:2.38	0/0:2.24	0/0:2.06	0/0:2.08	0/0:1.98	0/0:2.14	0/1:1.46	0/1:0.98	0/0:2.26	0/1:1.08	0/0:1.96	0/0:2.16	0/0:2.04	0/0:1.94	0/0:2.04	0/0:2.64	0/0:2.04	0/0:1.98	0/0:2.06	0/0:2.36	0/0:1.82	0/0:2.02
20	70407501	-0.00921867	-0.00473976	IRX2(dist=380759),TRNAS-GGA(dist=23077)	intergenic	20:70407501-70410500	CN0	0.785409	0/0:2.1	0/0:2.12	0/0:2.42	0/0:1.7	0/0:1.96	0/0:1.96	1/1:0.0	0/0:1.92	0/0:2.14	0/0:2.2	0/0:2.02	0/1:1.18	0/0:2.04	0/0:1.82	0/0:2.24	0/0:2.18	0/0:1.86	0/1:0.9	0/0:1.66	0/0:2.12	0/0:1.96	0/0:2.2	0/0:2.12	0/0:2.1	0/0:2.22	0/0:2.24	0/0:2.22	0/1:1.24	0/1:1.16	0/0:1.88	0/0:2.24	0/0:2.08	0/0:2.16	0/0:2.0	0/0:2.5	0/1:1.0	0/0:1.8	0/0:2.0	0/0:2.16	0/0:2.14	0/0:2.02
21	4317001	-0.00919878	-0.00389148	LOC102178769(dist=18792),GABRG3(dist=79087)	intergenic	21:4317001-4321500	CN0	0.779306	0/1:1.08	0/0:1.9	0/0:1.74	0/0:2.04	0/0:1.96	0/0:2.02	0/0:2.04	1/1:0.0	0/0:2.04	0/0:2.0	0/0:1.88	0/1:0.88	0/0:1.78	0/0:1.92	0/0:2.44	0/1:0.96	0/0:1.84	0/0:1.44	0/1:1.26	0/0:1.76	0/1:0.96	0/0:2.0	0/1:1.08	0/0:1.7	0/0:1.82	0/0:2.18	0/0:1.98	0/0:1.96	0/0:2.38	0/0:2.18	0/0:1.94	0/0:1.58	0/0:2.04	0/0:1.96	0/0:1.9	0/0:1.98	0/0:2.02	0/0:2.0	0/0:2.22	0/0:1.78	0/0:2.24
21	6188001	0.0254871	0.00440879	MEF2A	intronic	21:6188001-6191500	CN2	0.720541	0/0:2.14	0/0:1.92	0/0:2.38	0/0:2.44	0/0:2.28	0/0:2.54	0/0:2.18	0/0:2.44	0/0:2.28	0/0:2.38	0/0:2.32	0/0:2.04	0/0:2.24	0/0:2.44	0/0:2.26	0/0:2.3	0/0:2.34	0/0:2.36	0/0:2.06	0/1:2.72	0/0:2.4	0/0:2.02	0/0:2.26	0/0:2.1	0/0:1.96	0/0:2.36	0/0:2.32	0/0:2.22	0/0:1.82	0/0:2.26	0/0:1.96	0/0:2.26	0/0:2.22	0/0:1.94	0/0:2.02	0/0:2.12	0/0:1.96	0/0:2.56	0/0:1.9	0/0:2.34	0/0:1.9
21	8697001	0.000928139	-0.00155769	LOC108638492(dist=397284),LOC102171923(dist=954075)	intergenic	21:8697001-8700000	CN0	0.659312	0/0:1.7	0/0:1.86	0/0:1.6	0/0:2.04	0/0:1.56	0/0:2.14	0/0:1.96	0/1:1.24	0/1:1.1	0/0:1.96	0/0:1.74	0/0:1.92	0/0:2.02	0/0:1.96	0/1:1.2	0/0:1.88	0/0:1.78	0/0:1.7	0/0:2.02	0/1:1.5	0/0:2.02	0/0:1.68	0/0:2.1	0/0:1.84	0/0:1.58	0/0:1.9	0/0:2.02	0/0:1.8	0/0:1.84	0/0:1.68	0/0:2.04	0/0:1.8	0/0:1.86	0/0:1.82	0/0:2.06	0/0:2.26	0/0:1.86	1/1:0.02	0/0:2.04	0/0:1.96	0/0:2.32
21	18851501	-0.00666374	0.00866704	DET1(dist=25385),AEN(dist=18336)	intergenic	21:18851501-18854500	CN0	0.677587	0/0:1.96	0/0:2.04	0/0:1.6	0/1:1.2	0/1:1.06	0/1:0.74	0/1:1.22	0/1:1.0	0/0:1.78	0/1:0.72	0/1:1.06	0/0:1.9	0/1:1.06	0/0:2.06	0/1:1.0	0/0:1.88	0/1:1.16	0/1:1.06	0/0:2.48	0/0:2.04	0/1:1.16	0/0:1.76	0/1:1.14	0/0:1.96	0/1:1.04	0/1:1.5	0/1:0.84	0/0:1.96	0/1:0.68	0/0:1.74	0/1:0.58	0/0:2.12	0/0:2.3	0/1:0.94	0/1:1.46	1/1:0.32	0/0:2.14	0/0:2.32	0/0:2.1	0/1:1.3	0/0:2.04
21	19496501	0.0123857	0.0300907	LOC102182732(dist=1771),LOC102183270(dist=9917)	intergenic	21:19496501-19502500	CN0	0.709592	0/1:0.84	0/1:0.76	0/1:0.76	0/1:0.82	0/1:0.88	0/1:0.7	0/1:0.76	0/1:0.98	0/1:0.92	0/1:1.06	0/1:0.74	0/1:0.66	0/1:0.86	0/1:0.7	0/1:0.88	0/1:0.98	0/1:1.02	0/1:0.86	0/1:0.86	0/1:0.68	0/1:0.82	0/1:0.88	0/1:0.9	0/1:0.74	0/1:0.6	0/1:0.78	0/1:0.74	0/1:1.1	0/1:0.86	0/1:1.34	0/0:2.0	0/0:1.88	0/0:1.98	0/0:2.06	0/0:2.14	0/0:1.82	0/0:2.0	0/0:2.12	0/1:0.86	0/0:2.18	0/0:1.9
21	19504001	0.00495462	0.0322985	LOC102183270	upstream	21:19504001-19511500	CN0	0.708339	0/1:0.72	0/1:0.74	0/1:0.6	0/1:0.64	0/1:0.78	0/1:0.98	0/1:0.72	0/1:0.84	0/1:0.66	0/1:0.5	0/1:0.66	0/1:0.7	0/1:0.74	0/1:1.0	0/1:0.6	0/1:0.66	0/1:0.66	0/1:0.74	0/1:0.78	0/1:0.62	0/1:0.68	0/1:0.7	0/1:0.78	0/1:0.58	0/1:0.8	0/1:0.72	0/1:0.52	0/1:0.86	0/1:0.96	0/1:1.42	0/0:1.98	0/0:2.0	0/0:2.32	0/0:2.08	0/0:2.4	0/0:2.04	0/0:1.96	0/0:2.12	0/1:0.8	0/0:2.24	0/0:1.94
21	22867501	0.0878661	0.0455208	LOC108638538(dist=8748),LOC108638471(dist=5066)	intergenic	21:22867501-22874500	CN2,CNH	0.694652	1/1:4.12	0/1:3.18	0/0:2.22	0/0:1.72	0/0:1.96	0/1:2.84	0/1:2.88	0/0:1.82	1/2:5.28	0/0:2.12	0/0:2.28	0/1:2.74	0/1:2.94	0/0:1.74	0/0:2.02	1/1:4.16	0/1:3.16	0/0:1.88	0/1:3.06	0/1:3.02	0/0:1.82	0/1:3.1	0/1:3.16	0/1:3.16	0/0:1.72	0/1:2.78	0/1:2.8	0/0:1.74	0/1:2.92	0/1:3.02	0/0:2.12	0/1:2.98	0/1:3.14	1/1:4.28	1/1:4.04	0/0:2.06	0/0:2.04	0/1:2.92	1/2:4.96	1/1:4.08	0/1:2.82
21	22875001	0.0498896	0.0491194	LOC108638471	exonic	21:22875001-22890500	CN0,CN2,CNH	0.729461	0/2:3.1	0/0:2.2	0/1:1.2	0/1:1.16	0/1:1.1	0/0:2.04	0/0:2.16	0/1:1.12	2/2:4.16	0/1:1.14	0/1:1.24	0/0:2.1	0/0:2.28	0/0:1.48	0/1:1.26	0/2:3.1	0/0:2.1	0/1:1.02	0/0:2.28	0/0:2.16	0/1:1.24	0/0:2.18	0/0:2.26	0/0:2.2	0/1:1.04	0/0:2.3	0/0:2.2	0/1:0.96	0/0:2.12	0/0:1.82	0/1:1.16	0/0:2.2	0/0:1.76	0/2:3.26	0/2:3.4	0/1:1.18	0/0:2.06	0/2:2.78	2/2:4.04	0/2:3.22	0/0:2.2
21	22891501	-0.0102661	-0.00326394	LOC108638471(dist=11056),MEX3B(dist=417166)	intergenic	21:22891501-22897500	CN2,CNH	0.732215	0/1:3.22	0/0:2.3	0/1:3.28	0/1:3.1	0/1:3.34	0/1:3.06	0/0:2.4	0/0:2.3	0/1:3.1	0/0:2.64	0/1:3.22	0/1:3.28	0/1:3.28	1/1:3.96	0/1:3.54	0/0:2.4	0/0:2.26	0/0:2.46	0/0:2.32	0/1:2.94	0/1:3.14	0/0:2.32	1/1:4.22	0/0:2.26	0/1:3.58	0/0:2.48	0/0:2.6	2/2:6.04	0/0:2.44	0/0:2.02	1/1:4.2	1/1:4.3	0/1:3.06	0/1:3.4	0/0:2.4	0/0:1.94	0/0:2.08	0/1:3.32	0/0:2.14	0/0:2.26	0/0:2.24
21	22903501	-0.00894282	-0.00200561	LOC108638471(dist=23056),MEX3B(dist=403666)	intergenic	21:22903501-22911000	CN2	0.755249	0/1:3.04	0/0:2.04	0/1:2.74	0/1:2.76	0/0:2.22	0/1:3.08	0/0:2.06	0/0:2.14	0/0:2.06	0/0:1.94	0/0:2.18	0/0:2.02	0/0:2.04	0/0:2.5	0/0:2.24	0/0:1.98	0/0:2.14	0/0:2.16	0/0:2.02	0/1:3.12	0/1:3.0	0/0:2.18	0/0:1.98	0/0:2.08	0/0:2.56	0/0:2.02	0/0:2.16	0/1:2.88	0/0:1.94	0/0:1.9	0/0:2.04	0/0:2.28	0/0:2.26	0/0:2.26	0/0:2.06	0/0:2.18	0/0:2.14	0/0:2.14	0/0:2.42	0/0:2.34	0/0:2.1
21	27427501	0.118691	0.0544998	LOC102178490(dist=36351),LOC102183271(dist=147527)	intergenic	21:27427501-27447500	CN0	0.890336	0/1:1.02	0/0:2.0	0/1:0.98	0/0:1.96	0/0:2.24	0/0:2.12	1/1:0.0	0/0:2.28	0/0:2.14	0/1:1.16	0/1:1.04	0/1:1.0	0/0:1.98	0/0:1.86	0/1:1.06	0/0:2.14	1/1:0.0	0/0:2.0	0/0:2.06	0/0:2.08	0/0:1.9	0/0:2.08	0/1:1.04	0/0:1.94	0/0:2.18	0/0:2.02	0/0:2.08	0/0:1.94	0/0:2.02	0/0:2.06	0/0:1.96	0/0:1.9	0/0:2.0	0/0:1.96	0/0:2.0	0/0:1.98	0/0:1.9	0/0:2.2	0/0:2.04	0/0:2.14	0/0:2.0
21	27453501	0.110303	0.0516837	LOC102178490(dist=62351),LOC102183271(dist=137027)	intergenic	21:27453501-27458000	CN0	0.785008	0/1:1.02	0/0:1.98	0/1:1.44	0/0:1.76	0/0:2.38	0/0:2.5	1/1:0.0	0/0:2.32	0/0:2.18	0/1:1.3	0/1:1.28	0/1:1.0	0/0:1.9	0/0:2.1	0/1:1.02	0/0:1.94	1/1:0.0	0/0:1.9	0/0:2.52	0/0:2.22	0/0:1.94	0/0:2.2	0/1:0.92	0/0:1.74	0/0:1.88	0/0:2.14	0/0:1.88	0/0:1.92	0/0:2.26	0/0:1.9	0/0:2.0	0/0:1.82	0/0:2.28	0/0:2.08	0/0:2.22	0/0:1.9	0/0:1.76	0/0:1.94	0/0:2.04	0/0:2.34	0/0:2.12
21	37462501	0.000933283	0.00169732	TRNAS-GGA(dist=387067),TRNAC-GCA(dist=762510)	intergenic	21:37462501-37465500	CN0	0.763509	0/0:2.12	0/0:2.34	0/0:2.28	0/0:2.48	0/0:1.72	0/0:2.0	0/0:2.14	0/0:2.04	0/0:2.04	0/0:1.64	0/0:1.68	0/0:1.94	0/0:2.14	0/1:1.48	0/0:2.12	0/0:2.28	0/0:2.08	0/0:1.72	0/0:2.0	0/0:2.42	0/0:2.22	0/1:1.06	0/0:2.5	0/0:1.82	0/0:1.78	0/0:2.02	0/0:2.12	0/0:2.76	0/0:1.96	0/0:2.24	0/0:1.88	0/0:1.98	0/0:2.4	0/1:1.14	0/0:2.36	0/0:2.2	0/0:1.84	0/0:2.2	0/0:2.02	1/1:0.04	0/1:1.02
21	39705001	0.00113725	-0.00358243	PRKD1	intronic	21:39705001-39708000	CN0,CN2	0.721975	0/0:2.1	0/0:2.08	0/1:1.06	0/1:1.02	0/0:2.04	0/0:2.18	0/1:1.06	0/0:2.26	0/0:1.88	1/1:0.16	0/1:0.9	0/0:1.94	0/1:1.26	0/2:2.72	0/0:2.14	0/0:1.84	0/0:2.44	1/1:0.08	0/1:1.4	0/0:2.2	1/1:0.16	0/0:2.14	0/1:1.04	0/0:2.18	0/0:2.32	1/1:0.04	0/1:1.18	0/1:0.92	0/0:1.94	0/0:1.86	0/0:1.96	0/1:0.98	0/0:1.92	0/0:1.8	1/1:0.12	0/1:1.12	0/0:2.0	0/0:1.96	0/1:1.04	0/1:1.04	0/2:2.96
21	40362001	0.0562496	0.0242004	TRNAR-CCU(dist=226124),TRNAW-CCA(dist=224433)	intergenic	21:40362001-40364000	CN0,CN2	0.672761	0/0:2.16	0/1:1.14	0/0:1.98	0/0:1.8	1/1:0.0	1/1:0.0	1/1:0.02	0/1:0.82	0/0:2.02	0/0:2.4	0/2:2.52	0/1:1.1	0/1:0.98	0/1:0.9	0/0:2.04	0/0:2.16	1/1:0.0	0/0:1.68	0/1:1.02	0/1:1.08	0/0:1.88	1/1:0.02	1/1:0.02	0/1:1.18	0/1:0.9	0/0:1.66	0/1:1.48	0/0:1.7	0/1:1.32	0/0:1.84	0/0:1.94	0/0:2.2	0/0:2.06	0/0:2.06	0/0:1.96	0/0:2.04	0/0:2.1	0/0:2.26	0/0:1.8	0/0:1.66	0/0:1.84
21	40364501	0.057192	0.0188922	TRNAR-CCU(dist=228624),TRNAW-CCA(dist=218433)	intergenic	21:40364501-40370000	CN0,CN2	0.813296	0/0:2.26	0/1:1.2	0/0:2.18	0/0:2.18	1/1:0.02	1/1:0.0	1/1:0.0	0/1:1.24	0/0:2.04	0/0:2.1	0/0:2.34	0/1:1.0	0/1:1.18	0/1:1.16	0/0:2.4	0/0:2.24	1/1:0.06	0/0:2.16	0/1:0.98	0/1:1.26	0/0:2.26	1/1:0.02	1/1:0.04	0/1:1.32	0/1:1.06	0/0:2.22	0/0:2.02	0/0:2.32	0/1:1.04	0/0:1.8	0/0:2.1	0/0:2.28	0/0:1.88	0/0:2.04	0/0:1.92	0/0:2.06	0/0:1.92	0/0:1.92	0/0:2.42	0/0:2.12	0/0:2.12
21	40628501	-0.0012528	-0.00322193	TRNAW-CCA(dist=39997),G2E3(dist=5218)	intergenic	21:40628501-40631500	CN0	0.713899	1/1:0.42	0/1:1.22	0/1:0.68	1/1:0.48	0/0:1.76	0/0:1.92	0/1:1.06	1/1:0.3	0/0:1.86	0/1:0.64	0/1:1.24	1/1:0.32	0/1:1.16	0/0:1.66	1/1:0.46	1/1:0.42	0/1:1.42	1/1:0.44	1/1:0.32	1/1:0.52	1/1:0.48	0/0:1.72	0/1:1.32	1/1:0.42	1/1:0.54	1/1:0.5	1/1:0.24	1/1:0.5	1/1:0.26	0/0:1.78	1/1:0.36	0/1:1.18	1/1:0.46	0/0:2.08	0/1:1.2	0/1:0.9	1/1:0.38	0/1:1.22	0/1:1.14	0/1:1.3	1/1:0.54
21	45489001	0.0599406	0.0031445	BRMS1L(dist=29672),LOC102184559(dist=350186)	intergenic	21:45489001-45493500	CN2,CNH	0.810716	0/0:2.06	2/2:6.32	0/0:2.06	0/0:2.36	0/0:2.52	1/2:5.4	1/2:5.24	0/0:2.3	0/0:2.06	0/0:2.16	0/0:2.1	0/0:2.08	1/1:4.0	0/0:2.46	0/0:2.38	0/0:2.24	0/0:2.18	0/0:2.16	0/0:2.16	0/0:2.38	0/0:2.02	0/0:2.44	0/0:2.16	1/1:3.62	1/1:2.86	0/0:2.68	1/1:3.68	1/1:3.74	0/0:2.14	1/1:3.96	0/0:2.36	2/2:6.7	0/0:2.06	0/0:2.12	0/0:2.22	0/0:2.04	0/0:2.12	0/0:2.2	1/2:5.64	0/0:2.1	0/0:2.34
21	46377001	0.0021506	0.0029699	SLC25A21	intronic	21:46377001-46381500	CN0	0.80017	0/0:2.14	0/1:1.02	0/1:1.32	0/1:1.28	0/1:1.2	0/1:1.1	0/0:2.08	0/0:2.3	0/1:0.9	0/1:0.94	1/1:0.0	0/1:0.92	0/1:1.16	0/1:0.8	0/0:1.84	0/0:2.26	0/0:1.96	0/1:1.28	0/1:1.22	0/1:0.88	1/1:0.04	0/1:1.04	0/0:2.02	0/0:2.32	0/1:0.9	0/1:1.36	0/0:1.88	0/0:2.12	0/1:1.06	0/0:2.1	0/1:1.08	0/1:1.14	0/1:0.94	0/1:1.18	0/0:2.24	1/1:0.1	0/0:1.86	1/1:0.04	0/0:1.92	0/1:1.1	0/0:2.04
21	48084001	0.0307521	0.0193608	CLEC14A(dist=278609),SEC23A(dist=374088)	intergenic	21:48084001-48087000	CN0	0.674665	0/0:1.72	0/0:1.7	0/0:1.84	0/0:1.58	0/0:1.9	0/0:1.74	0/0:2.06	0/0:1.86	0/0:1.84	0/1:1.24	0/0:2.14	0/0:2.0	0/0:1.92	0/0:1.88	0/0:2.06	0/0:2.0	0/0:1.76	0/0:1.78	0/0:1.96	0/0:2.28	0/0:1.86	0/0:2.14	0/0:1.86	0/0:2.06	0/0:2.34	0/0:1.72	0/0:1.78	0/0:1.94	0/0:1.94	0/0:1.82	0/0:1.6	0/0:1.54	0/0:1.88	0/0:1.82	0/0:2.2	0/0:1.76	0/0:1.82	0/0:1.86	0/0:1.98	0/0:1.88	0/0:2.28
21	48397001	-0.00777239	-0.00205507	CLEC14A(dist=591609),SEC23A(dist=57088)	intergenic	21:48397001-48404000	CN2,CNH	0.812012	0/0:2.1	0/0:2.16	0/0:2.2	0/0:1.9	0/0:2.42	0/0:2.26	0/0:2.08	0/0:2.14	0/0:2.24	0/0:2.32	0/0:1.96	0/0:2.14	0/0:2.24	0/1:3.12	0/0:2.16	0/0:2.0	0/0:2.32	0/0:2.14	0/0:1.88	0/0:2.12	0/0:2.1	0/0:2.18	0/0:2.18	0/0:1.94	0/0:2.02	0/0:2.22	0/0:1.86	0/0:2.14	0/0:2.24	0/0:2.04	0/0:2.0	0/0:1.76	0/0:2.1	0/0:2.04	0/0:2.12	0/0:2.02	0/0:1.88	0/0:2.24	0/0:2.26	0/0:1.98	0/0:2.14
21	49774001	0.0189384	0.00932112	TRNAH-GUG(dist=400311),TRNASTOP-UCA(dist=757683)	intergenic	21:49774001-49776500	CN0	0.66356	0/0:2.12	0/0:2.04	0/0:1.9	0/0:2.16	0/0:1.96	0/1:1.26	0/0:2.04	0/0:1.52	0/0:1.86	0/0:2.3	0/1:1.36	0/0:2.2	0/0:1.82	0/0:2.08	0/0:1.96	0/0:1.92	0/0:2.08	0/0:2.18	0/0:2.0	0/0:2.0	0/0:2.34	0/1:1.22	0/0:2.1	0/0:2.12	0/0:1.86	0/0:2.44	0/0:2.06	0/0:1.68	0/0:1.76	0/0:1.74	0/0:2.12	0/0:2.22	0/0:1.86	0/0:1.88	0/0:2.18	0/0:1.66	0/0:2.12	0/0:1.96	0/0:1.84	0/0:2.1	0/0:1.96
21	50077501	-0.00851875	0.00053873	TRNAH-GUG(dist=703811),TRNASTOP-UCA(dist=450183)	intergenic	21:50077501-50084000	CN0	0.849502	0/0:2.08	0/1:1.06	0/1:1.16	0/1:0.86	0/1:0.88	0/0:1.9	0/0:2.08	0/0:2.32	0/0:2.04	0/0:2.18	0/0:1.94	0/0:2.1	0/0:2.36	0/0:2.36	0/0:2.12	0/0:2.0	0/0:1.94	0/0:2.34	0/0:2.14	0/0:2.12	0/0:2.1	0/0:2.1	0/0:2.1	0/0:2.16	0/0:2.12	0/0:2.5	0/0:1.96	0/0:1.9	0/0:2.3	0/1:1.02	0/0:2.14	0/0:1.84	0/0:2.12	1/1:0.0	0/1:1.0	0/0:1.92	0/0:2.04	0/1:1.02	0/0:1.98	0/0:2.08	0/0:2.1
21	51149501	-0.00866234	-0.00289465	LRFN5(dist=113656),LOC102175621(dist=1287388)	intergenic	21:51149501-51152000	CN0,CN2	0.774591	0/1:1.1	0/1:1.02	0/1:1.1	0/1:1.08	1/1:0.08	1/1:0.16	1/1:0.26	1/1:0.2	0/1:0.96	0/1:0.7	0/0:1.4	1/1:0.18	0/0:1.92	1/1:0.16	1/1:0.26	0/1:0.9	0/1:1.1	1/1:0.24	1/1:0.18	0/0:1.92	0/1:1.08	1/1:0.18	1/1:0.26	0/1:1.06	1/1:0.08	0/1:0.82	0/1:1.02	1/1:0.26	0/1:0.92	0/1:0.9	0/0:2.02	1/1:0.14	1/1:0.08	1/1:0.1	0/0:2.04	0/0:2.14	1/1:0.16	0/0:2.26	0/1:1.12	1/1:0.1	0/1:1.16
21	53519001	-0.00828997	-0.00363663	LOC102175621(dist=1079340),TRNAC-ACA(dist=16388)	intergenic	21:53519001-53524500	CN0	0.770211	0/0:2.24	0/0:2.08	0/0:1.96	0/1:1.16	1/1:0.38	0/0:1.5	1/1:0.48	0/0:1.52	0/1:1.22	1/1:0.3	0/0:2.3	0/1:1.28	0/1:1.28	0/1:1.04	0/0:2.3	0/1:1.12	1/1:0.32	0/1:1.32	0/1:1.12	0/0:1.56	1/1:0.38	0/0:1.52	0/0:2.3	0/1:1.38	0/1:1.28	0/1:1.22	0/1:1.04	0/0:2.1	0/1:1.36	0/1:1.08	0/0:1.84	0/0:1.98	0/1:1.18	0/0:1.76	0/0:2.08	0/1:1.32	0/1:1.08	0/0:1.78	0/0:2.14	0/1:1.28	1/1:0.34
21	62749501	-0.00829417	-0.000492313	TRNAS-GGA(dist=109606),BCL11B(dist=720926)	intergenic	21:62749501-62752500	CN0	0.747569	0/0:2.16	0/0:1.78	0/0:1.78	0/0:1.54	0/0:1.9	0/0:1.9	0/0:2.12	0/0:2.08	0/1:1.16	0/0:2.3	0/1:1.16	0/1:1.1	0/0:2.02	0/0:2.46	0/0:2.06	0/0:1.7	0/0:1.72	0/0:2.12	0/0:2.42	0/0:1.92	0/0:2.02	0/0:2.06	0/0:2.14	0/0:2.06	0/0:2.16	0/0:2.08	0/0:1.98	0/0:1.82	0/0:1.64	0/0:1.72	0/0:1.72	0/0:1.6	0/0:2.22	0/0:2.08	0/0:2.14	0/1:0.96	1/1:0.0	0/0:2.14	0/0:2.14	0/0:1.86	0/0:2.26
21	63870501	0.110213	0.0591847	CCDC85C	intronic	21:63870501-63874500	CN0	0.718135	0/1:1.06	0/1:0.9	0/1:1.0	0/0:1.84	0/1:0.94	1/1:0.06	0/1:0.96	1/1:0.06	0/0:1.58	0/1:1.08	1/1:0.0	0/0:1.62	0/0:1.58	0/0:2.1	0/0:1.62	0/1:1.1	1/1:0.0	0/1:1.22	0/0:1.92	0/0:1.6	0/1:1.44	0/0:1.74	1/1:0.02	1/1:0.14	0/0:2.22	0/0:1.78	1/1:0.0	0/1:1.06	0/1:0.86	0/0:2.48	0/0:1.96	0/0:2.16	0/0:1.88	0/0:1.9	0/0:2.2	0/0:1.98	0/0:1.7	0/0:2.22	0/0:2.1	0/0:1.82	0/0:1.82
21	67054501	-0.0111035	-0.0024525	LOC106501899,LOC108638483,TNFAIP2	exonic	21:67054501-67144500	CN2	0.798857	0/0:2.1	1/1:3.38	0/0:2.1	0/1:2.72	0/1:2.74	0/0:2.16	0/1:2.68	1/1:3.32	0/0:2.08	0/1:2.62	0/1:2.82	0/0:2.12	0/1:2.68	0/0:2.12	0/0:2.12	0/0:2.12	0/1:2.82	0/0:2.2	0/1:2.74	0/1:2.84	1/1:3.38	0/0:2.16	1/1:3.4	0/1:2.6	0/0:2.24	0/1:2.64	0/0:2.12	0/1:2.88	0/1:2.84	1/1:3.9	1/1:3.9	1/1:3.46	1/1:3.56	1/1:3.48	1/1:3.44	1/1:3.52	1/1:3.54	1/1:3.52	1/1:3.56	1/1:3.5	1/1:4.54
22	334501	0.13789	0.0721986	DBNL(dist=27692),VOPP1(dist=47800)	intergenic	22:334501-340500	CN0	0.834191	0/1:1.1	0/0:2.1	1/1:0.08	0/1:1.08	0/1:1.32	0/0:2.08	0/1:1.08	0/1:0.98	0/0:2.0	0/1:0.96	0/0:1.8	0/0:2.02	0/1:1.1	0/1:0.92	1/1:0.0	0/0:2.12	0/0:2.02	1/1:0.08	0/1:1.16	0/0:2.2	1/1:0.02	0/1:1.18	0/1:1.2	1/1:0.34	0/1:0.96	0/1:1.14	0/1:0.9	1/1:0.04	0/0:2.38	0/1:1.04	0/0:1.88	0/1:0.98	0/0:2.28	0/1:1.1	0/1:1.18	0/1:1.0	0/0:1.98	1/1:0.0	0/0:2.2	0/0:2.06	0/0:2.02
22	7369001	0.0993016	0.0383288	CRTAP	intronic	22:7369001-7374500	CN2	0.763028	0/1:2.82	0/0:2.16	0/0:2.22	1/1:3.6	1/1:4.12	0/0:2.56	0/0:2.12	0/0:2.02	0/0:1.96	0/0:1.88	0/0:2.06	0/0:2.06	0/0:2.02	0/0:1.78	0/0:2.14	0/0:2.06	0/0:2.08	1/1:4.0	0/0:2.52	0/1:3.16	0/1:3.32	0/0:2.16	0/1:2.82	0/1:2.84	0/0:2.16	0/1:3.1	1/1:3.78	0/0:2.56	0/0:2.1	0/1:3.28	0/0:2.06	0/0:2.08	0/0:2.1	0/0:2.08	0/0:2.1	0/0:2.24	0/0:2.1	0/0:2.54	0/0:1.94	0/0:2.2	0/0:1.92
22	8732001	0.0156892	-0.000375553	TRNAS-GGA(dist=531772),TRNAQ-CUG(dist=629216)	intergenic	22:8732001-8735500	CN0,CN2	0.679736	1/1:0.06	0/0:1.94	0/1:1.34	1/1:0.06	0/1:1.28	0/1:1.26	0/1:1.22	0/1:0.88	0/1:1.16	0/1:1.04	0/0:2.1	0/0:1.94	1/1:0.08	0/1:1.38	0/2:2.52	0/1:1.02	1/1:0.18	0/1:1.12	0/1:1.22	0/0:2.18	1/1:0.12	0/1:1.18	0/1:0.98	1/1:0.2	0/0:2.36	0/1:1.22	0/0:1.82	0/1:1.24	0/1:0.86	0/0:2.0	0/0:2.22	0/0:1.96	0/0:2.06	0/0:1.96	0/0:2.18	1/1:0.14	0/1:1.08	0/0:2.44	0/1:1.32	1/1:0.2	0/2:2.5
22	9233501	0.00462183	0.000534803	TRNAS-GGA(dist=1033272),TRNAQ-CUG(dist=128716)	intergenic	22:9233501-9236000	CN0	0.827108	0/0:1.94	0/1:1.1	0/1:0.88	0/0:2.76	0/1:0.8	0/1:1.04	0/1:1.06	0/1:1.3	0/1:1.0	0/1:0.7	1/1:0.0	0/0:1.92	0/1:0.94	0/1:1.04	0/0:2.04	1/1:0.02	0/0:2.08	1/1:0.12	0/0:2.3	1/1:0.12	0/0:2.12	0/1:1.06	0/1:1.0	0/0:1.56	1/1:0.0	0/0:1.58	0/0:2.14	0/1:1.08	0/1:1.34	0/0:2.04	1/1:0.02	0/1:1.08	0/0:2.5	1/1:0.04	1/1:0.04	1/1:0.04	1/1:0.04	1/1:0.04	0/1:1.06	1/1:0.02	1/1:0.16
22	9236501	0.00757136	0.00626716	TRNAS-GGA(dist=1036272),TRNAQ-CUG(dist=126216)	intergenic	22:9236501-9238500	CN0,CN2	0.732474	0/0:1.54	0/1:0.98	0/1:0.9	0/0:1.68	0/1:1.14	0/1:1.3	0/1:1.1	0/1:0.7	0/1:0.98	0/1:0.9	1/1:0.1	0/0:1.98	0/1:1.06	0/1:1.3	0/0:2.0	1/1:0.02	0/0:2.0	1/1:0.0	0/2:2.76	1/1:0.04	0/0:2.12	0/1:1.24	0/1:1.2	0/0:1.78	1/1:0.08	0/0:1.48	0/0:2.04	0/1:1.32	0/1:0.84	0/0:2.04	1/1:0.04	0/1:1.32	0/0:2.04	1/1:0.06	1/1:0.0	1/1:0.06	1/1:0.04	1/1:0.02	0/1:0.7	1/1:0.02	1/1:0.1
22	9714501	-0.0109515	-0.0037963	ARPP21(dist=78928),STAC(dist=291538)	intergenic	22:9714501-9718500	CN0	0.824174	0/0:2.14	0/0:2.06	0/0:1.98	0/0:1.98	0/0:1.94	0/0:1.88	0/0:1.92	0/1:0.96	0/0:2.1	0/1:1.26	0/0:2.32	0/0:1.9	0/1:1.06	0/1:0.76	1/1:0.02	0/1:0.98	0/0:2.24	1/1:0.0	0/0:2.06	0/1:1.22	0/0:2.02	0/1:1.14	0/1:1.1	0/0:1.7	1/1:0.0	0/0:2.06	0/0:1.94	0/0:1.94	0/1:1.12	0/0:2.14	0/1:1.04	0/0:2.1	0/0:2.1	0/1:1.12	1/1:0.0	1/1:0.0	1/1:0.0	0/1:1.08	0/0:2.06	1/1:0.0	0/0:2.06
22	13505001	0.00804896	0.000792188	LOC102190827(dist=265309),CTNNB1(dist=162187)	intergenic	22:13505001-13508500	CN0	0.788239	0/0:2.06	0/1:1.22	0/0:1.68	0/1:1.08	0/0:2.06	0/0:2.4	0/1:1.24	0/0:1.74	0/0:2.0	0/1:0.96	0/0:2.04	0/1:1.04	1/1:0.06	0/0:2.12	0/0:1.98	0/0:2.06	0/0:1.96	0/0:1.84	0/1:0.88	0/0:2.22	0/1:1.0	0/1:1.18	0/0:1.94	0/1:1.28	0/0:1.6	0/0:2.04	0/0:2.3	0/0:1.88	0/1:0.86	0/0:2.06	0/1:1.02	1/1:0.08	1/1:0.1	0/1:1.02	1/1:0.12	1/1:0.1	1/1:0.06	1/1:0.08	0/0:2.14	1/1:0.08	0/1:1.06
22	16388001	-0.00331096	-0.0033313	KIF15(dist=1308),TATDN2(dist=57467)	intergenic	22:16388001-16396500	CN0	0.895691	0/0:1.92	1/1:0.0	0/0:1.82	1/1:0.0	0/0:2.12	0/0:1.82	0/0:2.2	0/1:1.16	1/1:0.0	0/0:2.02	0/0:1.9	0/0:1.98	0/0:1.94	0/0:1.64	0/0:2.0	0/0:1.96	0/0:1.8	0/0:2.26	0/0:2.06	1/1:0.0	0/1:0.96	1/1:0.0	0/1:1.08	0/1:1.22	1/1:0.0	0/0:1.92	0/1:1.04	0/1:1.12	1/1:0.02	1/1:0.0	0/0:1.86	0/0:2.0	0/0:2.06	0/1:0.94	0/0:2.02	0/0:2.1	0/0:1.94	0/0:2.14	0/0:2.18	0/0:2.1	0/0:2.02
22	18899001	0.0943831	0.0643627	GRM7	intronic	22:18899001-18902500	CN0	0.841763	0/1:1.08	1/1:0.22	0/1:1.4	1/1:0.1	0/1:1.3	0/1:1.22	0/0:2.44	1/1:0.22	1/1:0.06	0/1:1.1	0/0:1.94	0/1:1.08	0/1:1.28	1/1:0.38	0/0:1.62	1/1:0.14	0/1:1.12	1/1:0.0	1/1:0.18	1/1:0.32	0/1:1.18	0/1:1.2	0/0:2.44	0/1:1.28	0/1:1.18	0/1:1.16	1/1:0.16	0/1:1.22	0/1:1.28	1/1:0.12	0/1:1.2	1/1:0.04	1/1:0.04	1/1:0.08	1/1:0.06	0/1:1.1	1/1:0.06	1/1:0.18	1/1:0.06	1/1:0.04	1/1:0.28
22	19943001	-0.00308409	0.000520392	GRM7(dist=565839),TRNAS-GGA(dist=984870)	intergenic	22:19943001-19946500	CN2,CNH	0.706664	0/0:2.0	0/0:2.1	0/0:2.04	0/0:1.56	0/0:2.08	0/0:2.04	0/0:2.22	0/0:1.4	0/0:1.9	0/0:2.02	0/0:2.22	0/1:2.86	0/0:1.84	0/0:2.04	0/0:2.18	0/1:2.88	0/0:1.78	0/0:2.48	0/0:1.84	0/0:2.34	0/0:2.12	0/0:2.02	0/0:1.96	0/0:2.26	0/0:2.0	0/0:1.78	0/0:2.1	0/0:1.32	0/0:1.94	0/0:1.6	0/1:2.68	0/0:2.22	0/0:1.9	0/0:1.94	0/0:2.12	0/0:2.08	0/0:1.94	0/0:2.0	0/0:2.04	0/0:2.06	0/1:2.8
22	20938001	0.0381267	-0.00275751	TRNAS-GGA(dist=6560),EDEM1(dist=87723)	intergenic	22:20938001-20942000	CN0,CN2	0.717217	0/0:2.16	0/0:2.32	0/0:2.3	0/0:2.1	0/0:2.4	0/0:2.38	0/0:1.92	0/0:2.28	1/1:0.04	0/0:2.22	0/0:2.22	0/0:2.02	0/0:2.18	0/0:2.38	0/1:1.22	0/0:2.28	0/1:1.12	0/1:0.9	0/0:2.06	1/1:0.08	0/0:2.08	0/0:2.18	0/1:1.12	0/0:2.28	0/0:2.08	0/2:2.82	0/1:0.96	0/0:2.46	0/0:2.38	0/0:2.14	0/0:1.88	0/0:2.02	0/0:2.06	0/1:1.08	0/0:2.18	0/0:2.2	0/0:2.16	0/0:1.96	0/1:1.14	0/0:2.0	0/0:2.26
22	25389501	-0.00247185	-0.000284268	CNTN6(dist=205502),CHL1(dist=476312)	intergenic	22:25389501-25396000	CN0,CN2	0.693721	0/0:2.08	0/0:1.84	0/0:1.86	0/0:1.92	0/0:1.86	0/0:2.34	0/0:1.84	0/0:1.82	0/0:1.98	0/0:2.22	0/0:1.8	0/0:1.8	0/0:2.08	0/0:1.92	0/0:2.0	0/0:1.86	0/1:1.04	0/1:1.08	0/0:1.8	0/0:1.82	0/0:2.04	0/0:2.06	0/0:1.84	0/0:2.02	0/0:2.04	0/0:1.72	0/0:1.94	0/0:2.26	0/0:1.74	0/0:1.62	0/0:1.9	0/0:1.82	0/0:2.04	0/0:2.08	0/0:2.1	0/0:1.92	0/0:1.84	0/0:1.74	0/0:1.72	0/0:2.1	0/0:2.18
22	26661501	-0.00223265	-0.00211225	CHL1(dist=559652),CNTN3(dist=382716)	intergenic	22:26661501-26678500	CN0	0.888911	0/1:0.98	0/0:1.96	0/0:1.84	0/0:1.96	0/0:1.96	0/1:0.9	0/0:1.96	0/0:1.96	0/0:1.84	0/0:1.8	0/0:2.12	0/0:1.92	0/0:1.94	0/0:1.74	0/0:2.08	0/0:1.92	0/1:1.0	0/0:1.98	0/0:2.4	0/1:1.04	0/1:1.02	0/1:0.98	0/0:1.96	0/0:1.9	0/0:1.94	0/0:1.92	0/0:1.86	0/0:2.0	0/0:1.86	0/0:1.96	0/0:1.96	0/0:1.86	0/0:1.92	0/1:1.02	0/0:2.1	0/0:2.0	0/0:1.76	0/0:1.92	0/0:2.0	0/0:2.06	0/0:2.28
22	26802501	-0.00737318	-7.35841e-05	CHL1(dist=700652),CNTN3(dist=246216)	intergenic	22:26802501-26815000	CN0	0.818133	1/1:0.26	0/0:2.0	0/0:2.04	0/1:1.36	0/1:1.04	0/0:2.08	0/0:2.06	0/1:1.52	0/0:2.12	0/0:2.12	0/0:2.24	0/0:2.2	0/0:2.12	0/1:0.98	0/1:1.4	0/0:2.12	0/0:2.26	0/0:1.88	0/1:1.2	0/0:2.22	0/1:1.36	0/0:2.08	0/0:2.12	0/1:1.3	0/0:2.14	0/0:2.28	0/1:1.24	0/1:1.26	0/1:1.06	0/0:1.84	0/0:1.94	0/1:1.08	0/0:2.04	0/1:1.2	1/1:0.42	0/1:1.16	0/0:1.82	0/0:2.1	0/0:2.0	0/0:2.12	0/0:2.22
22	26899001	-0.00683873	-0.003782	CHL1(dist=797152),CNTN3(dist=147716)	intergenic	22:26899001-26913500	CN0	0.857389	0/1:1.1	0/1:1.12	0/0:2.24	0/0:2.04	0/1:1.08	0/0:2.24	0/0:2.2	0/0:2.32	0/0:2.12	0/0:2.18	0/0:2.22	0/0:1.98	0/0:2.12	0/1:0.86	0/0:2.3	0/1:1.06	0/0:2.06	0/0:2.08	0/0:2.06	0/0:2.02	0/0:2.12	0/0:2.24	0/0:2.18	0/0:1.78	0/0:2.14	0/0:2.16	0/0:2.34	0/0:1.98	0/1:1.02	0/0:2.02	0/0:2.08	0/0:1.9	0/0:2.04	0/0:2.12	0/0:2.06	0/0:1.94	0/0:1.88	0/0:2.06	0/0:1.88	0/0:1.78	0/0:2.0
22	42054001	-0.00172614	-0.00223478	LOC106503441(dist=193263),C22H3orf67(dist=236457)	intergenic	22:42054001-42058000	CN0,CN2	0.673819	1/1:0.38	0/0:1.62	0/1:1.34	1/1:0.34	1/1:0.36	0/1:1.34	1/1:0.58	1/1:0.52	1/1:0.28	1/1:0.38	0/2:2.6	1/1:0.4	1/1:0.32	0/0:1.56	0/1:1.3	0/1:1.34	0/1:1.38	0/1:1.34	1/1:0.28	0/1:1.36	1/1:0.28	1/1:0.38	0/1:1.22	0/1:1.42	1/1:0.4	1/1:0.5	0/0:1.52	1/1:0.38	1/1:0.4	0/0:2.02	0/1:1.26	1/1:0.4	0/1:1.16	1/1:0.38	1/1:0.48	1/1:0.14	1/1:0.3	1/1:0.42	0/0:2.14	1/1:0.24	1/1:0.3
22	44722501	0.0944876	0.0232523	ERC2	intronic	22:44722501-44727000	CN0,CN2	0.671576	0/1:1.1	0/0:2.34	0/1:1.26	0/1:1.38	1/1:0.04	0/0:1.88	0/0:2.08	0/1:1.42	0/0:2.36	0/0:2.16	0/0:2.4	1/1:0.04	0/0:2.12	0/0:2.12	1/1:0.08	0/1:1.24	0/0:1.98	0/0:1.92	1/1:0.0	0/0:2.12	0/0:2.24	0/1:1.2	0/1:1.08	0/0:1.9	0/1:1.3	0/2:2.9	0/1:1.16	1/1:0.04	0/0:2.32	0/0:2.1	0/0:1.86	0/0:1.82	0/0:2.4	0/0:2.04	0/0:2.28	0/0:2.06	0/0:1.94	0/0:2.34	1/1:0.06	0/0:2.3	0/0:2.0
22	47538501	-0.0101229	-0.00397224	CACNA1D(dist=289292),DCP1A(dist=22201)	intergenic	22:47538501-47546500	CN0	0.837014	0/0:2.04	0/0:2.0	0/0:2.08	0/0:2.06	0/0:2.28	0/0:2.18	0/0:1.94	0/0:2.48	0/0:2.18	0/0:1.92	0/0:2.2	0/0:1.86	0/0:2.04	0/0:1.92	0/0:2.0	0/0:2.02	0/0:2.06	0/0:2.16	0/0:1.86	0/0:2.26	0/0:2.06	0/0:2.14	0/0:2.1	0/0:1.9	0/0:2.4	0/0:2.26	0/0:2.16	0/0:2.0	0/0:1.94	1/1:0.04	0/0:2.08	0/1:1.06	0/0:2.24	0/0:2.02	0/0:2.02	0/0:1.98	0/0:1.94	0/0:2.02	0/0:2.06	0/0:2.02	0/0:1.94
22	48974001	-9.55463e-05	0.0563507	DUSP7(dist=51104),RPL29(dist=54712)	intergenic	22:48974001-48981000	CN0	0.795094	0/1:1.12	0/1:0.92	0/1:1.02	0/1:1.14	0/1:1.08	0/1:1.1	0/1:1.04	0/1:1.1	0/1:0.98	0/1:0.86	0/1:1.04	0/1:0.96	0/1:1.0	0/1:1.44	0/1:1.14	0/1:0.78	0/1:1.06	0/1:0.96	0/1:0.82	0/1:1.14	0/1:0.9	0/1:1.06	0/1:0.9	0/1:0.94	0/1:1.02	0/1:1.08	0/1:1.14	0/1:0.74	0/1:0.9	0/1:1.0	0/1:0.74	0/1:0.7	0/1:1.12	0/1:0.9	0/1:0.92	0/1:0.7	0/1:0.78	0/1:0.92	0/1:1.0	0/1:0.8	0/1:0.86
22	51581501	0.0712955	0.0129574	BAC5,BAC7.5,LOC102169231,LOC102170003,LOC102171106,LOC102181444,MAP28,MAP34-B,NME6,SPINK8	exonic	22:51581501-51718500	CN2,CNH	0.889551	0/0:2.1	0/0:2.22	0/1:3.12	1/1:4.02	0/0:2.16	0/0:2.1	0/0:2.16	0/0:2.18	0/0:2.08	0/1:3.06	0/0:2.24	0/1:3.0	0/0:2.22	0/1:3.18	0/0:2.16	0/0:2.04	0/0:2.14	0/0:2.06	0/1:3.06	0/0:2.08	0/1:3.04	0/1:3.08	0/0:2.16	0/1:2.92	0/1:3.18	0/0:2.2	0/0:2.06	0/0:2.24	0/1:3.26	0/0:2.3	0/0:2.04	0/0:2.04	0/0:2.22	0/0:2.08	0/0:2.12	0/0:2.06	0/0:2.06	0/0:2.08	0/0:2.12	0/0:2.1	0/0:2.04
22	59011501	0.00912726	0.0252463	CNBP	exonic	22:59011501-59015500	CN2,CNH	0.651237	0/0:2.04	0/0:2.1	0/0:2.02	0/0:1.96	0/0:1.88	0/0:2.16	0/0:1.98	0/0:1.62	0/0:1.8	0/0:1.5	0/0:1.82	0/0:2.04	0/0:1.94	0/0:2.14	0/0:1.78	0/0:2.04	0/0:2.06	0/0:2.08	0/0:2.38	0/0:2.3	0/0:2.14	0/0:1.86	0/0:1.92	0/0:2.02	0/0:1.9	0/0:1.9	0/0:1.82	0/0:1.96	0/0:2.4	0/1:3.02	0/0:2.08	0/1:2.64	0/0:2.08	0/0:1.94	0/0:1.58	0/0:1.86	0/0:2.44	0/0:2.34	0/0:1.96	0/0:2.18	0/0:2.22
23	1592001	0.00335025	-0.000504425	LOC108633473	exonic	23:1592001-1610500	CN0,CN2	0.662544	0/0:2.0	0/0:1.84	0/0:1.7	0/0:1.98	0/0:1.98	0/0:1.98	0/0:1.98	0/0:2.12	0/0:2.1	0/0:1.76	0/0:1.86	0/0:1.98	0/0:2.04	0/0:2.12	0/0:2.06	0/0:1.96	0/0:2.1	0/0:1.92	2/2:3.42	0/0:2.0	0/0:2.2	0/0:1.68	0/0:2.0	0/0:2.02	0/0:1.94	0/0:1.76	0/0:1.82	0/0:2.14	0/0:2.06	0/0:2.4	0/0:1.82	0/0:2.36	0/0:2.24	0/0:2.14	0/0:2.26	0/0:2.08	0/0:2.02	0/0:2.24	0/0:2.28	0/0:2.28	0/0:1.98
23	14938501	0.0231008	0.0161747	LOC108633536	exonic	23:14938501-14957500	CN0,CN2,CNH	0.733618	0/0:1.74	0/2:2.9	0/2:2.98	0/2:3.08	2/2:3.94	2/2:4.12	0/0:2.12	0/2:2.98	0/0:2.14	0/1:1.2	2/2:3.52	0/0:2.1	2/2:4.04	0/0:2.06	0/0:2.24	0/0:2.08	0/2:3.18	0/0:2.12	0/2:3.08	2/2:4.34	0/0:2.08	0/2:2.86	0/0:2.04	0/2:3.04	0/0:2.24	0/0:1.88	0/0:2.18	0/0:2.04	0/2:3.3	0/2:3.28	0/2:3.38	0/0:2.08	0/0:2.16	0/0:2.06	0/0:2.12	0/0:2.22	0/0:2.06	0/0:2.24	0/0:2.04	0/0:2.08	0/2:2.78
23	15443501	-0.00887507	-0.00448417	PXDC1	intronic	23:15443501-15447000	CN0	0.768891	0/0:1.68	0/0:2.28	0/0:1.86	0/0:2.3	0/1:1.2	0/0:2.1	0/0:1.84	0/0:1.86	0/0:1.74	0/0:2.12	0/1:1.12	0/1:1.22	0/0:1.88	0/0:2.1	1/1:0.08	0/0:2.14	0/0:1.94	0/0:2.06	0/0:1.62	0/0:1.94	0/1:0.92	0/0:2.0	0/0:1.88	0/1:1.12	0/0:2.28	0/0:1.96	0/0:1.7	0/0:1.92	0/0:1.88	0/0:2.1	0/0:2.14	0/0:2.22	0/1:1.24	0/0:1.86	0/0:2.04	0/1:1.02	0/0:1.94	0/1:1.1	0/0:2.08	0/1:1.32	0/0:1.98
23	20713001	0.00770075	0.00369435	LOC102190086,LOC108633453	exonic	23:20713001-20759000	CN0,CN2	0.766625	0/0:2.36	0/2:3.18	0/0:2.36	0/2:3.22	0/0:2.38	0/2:3.22	0/2:3.3	0/2:3.3	0/2:3.14	0/2:3.18	0/2:3.3	0/0:2.24	0/2:3.08	2/2:4.18	0/2:3.2	0/2:3.18	0/2:3.26	0/0:2.32	0/2:3.36	0/2:3.18	0/2:3.1	0/2:3.08	0/2:3.1	0/2:3.02	0/2:3.36	0/2:3.1	0/2:3.08	0/2:3.18	0/2:3.36	0/2:3.12	0/2:3.16	0/2:3.3	0/2:3.22	0/2:2.94	0/2:3.04	0/2:3.14	0/2:3.2	0/2:3.06	0/2:3.28	0/2:3.16	0/2:3.14
23	20781001	0.00580157	-0.000241166	LOC102187907,LOC108633452	exonic	23:20781001-20809500	CN0,CN2	0.7323	0/0:2.14	0/0:2.08	0/2:3.22	0/1:1.18	0/2:3.14	0/0:2.24	0/2:2.92	0/0:2.66	0/2:3.2	0/1:1.32	0/0:2.18	0/0:2.04	0/1:1.14	2/2:3.64	0/0:2.1	0/2:3.04	0/1:1.3	0/0:2.32	0/2:3.16	0/2:3.08	0/1:1.06	0/2:3.14	0/0:2.24	0/0:2.18	0/2:3.22	0/0:2.24	0/0:2.1	0/2:3.16	0/0:2.02	0/0:1.98	0/2:2.84	0/2:2.96	0/2:3.0	0/0:1.92	0/2:3.06	0/2:2.9	0/2:2.92	0/0:1.86	0/2:3.12	0/0:1.86	0/2:2.94
23	20864001	-0.00162805	-0.00269194	LOC102187359(dist=11695),LOC106504020(dist=23265)	intergenic	23:20864001-20869500	CN0	0.845834	1/1:0.02	0/0:2.2	0/1:0.98	0/0:2.0	0/1:1.2	0/0:2.0	0/1:1.08	0/0:2.18	0/0:2.14	0/0:1.98	0/0:1.86	1/1:0.06	0/0:2.04	0/0:1.9	0/0:2.28	0/0:1.88	0/1:0.9	1/1:0.04	0/1:0.94	0/1:1.1	0/1:1.14	0/1:1.04	0/1:1.04	0/0:2.28	1/1:0.0	1/1:0.08	0/0:1.54	0/0:2.14	0/1:0.92	0/0:2.1	0/0:1.96	0/1:1.12	0/0:1.78	0/1:1.08	1/1:0.0	0/1:1.0	0/0:1.98	0/1:0.96	0/0:1.88	0/1:0.9	0/1:0.94
23	21026001	-0.00269191	-0.00309658	LOC102176375	exonic	23:21026001-21049000	CN2	0.734946	0/0:2.0	1/1:4.0	0/1:2.84	0/1:3.28	0/0:2.08	0/0:2.08	0/0:2.3	0/0:2.1	0/1:3.02	0/0:1.98	0/1:3.3	0/0:1.92	0/0:1.94	0/0:1.68	0/0:2.02	0/1:2.96	0/1:3.26	0/0:2.32	1/1:3.42	1/1:3.48	0/1:2.96	0/1:3.04	0/0:1.94	0/1:2.92	0/1:3.0	0/1:3.28	0/0:2.18	0/0:1.88	0/1:2.54	0/1:2.9	0/0:2.1	0/0:1.86	0/0:2.2	0/0:2.0	0/0:1.98	0/1:2.86	0/0:2.08	0/0:1.78	0/1:2.6	0/1:2.76	0/1:2.92
23	21968001	0.00800866	0.00101366	LOC102168905,LOC102170045	exonic	23:21968001-21976000	CN0,CN2	0.66176	0/0:1.84	0/1:1.18	0/0:1.74	0/0:1.92	0/0:2.12	0/1:1.38	0/0:1.84	0/0:1.78	0/1:1.06	0/0:2.04	0/0:1.92	0/0:1.88	0/1:1.06	0/1:1.5	0/1:1.0	0/0:1.86	0/0:2.06	0/1:1.38	0/1:1.38	0/0:1.72	0/0:1.9	0/0:1.92	0/0:1.88	0/0:1.98	0/0:1.84	0/0:1.76	0/0:1.98	0/0:2.16	0/0:1.86	0/0:1.96	0/0:2.28	0/0:2.12	0/0:2.12	0/0:2.2	0/0:2.12	0/0:2.12	1/1:0.14	0/1:1.06	0/1:0.64	0/1:1.0	0/0:2.06
23	23487501	0.049297	0.0192039	LOC102179937,LOC102180664	exonic	23:23487501-23554000	CN0	0.797427	0/1:1.26	1/1:0.28	0/0:1.9	0/1:0.94	1/1:0.36	0/1:1.0	0/1:1.2	0/1:0.94	0/1:1.2	0/1:1.12	0/1:1.12	0/1:1.16	0/1:1.16	1/1:0.3	1/1:0.34	0/1:0.98	0/1:1.16	0/1:1.28	0/1:1.22	0/1:1.34	0/0:1.7	0/0:2.02	0/0:1.94	0/0:1.58	0/0:2.08	0/1:0.96	0/1:1.2	0/0:1.54	0/1:1.24	0/0:1.8	0/0:1.64	0/0:1.78	0/1:0.92	0/0:1.92	0/1:1.2	0/1:1.18	0/0:1.98	1/1:0.2	0/0:1.78	0/1:1.2	0/0:1.84
23	23573001	0.00613946	0.00421718	LOC102180664	intronic	23:23573001-23576500	CN0	0.738774	0/0:1.64	0/0:1.66	0/0:1.56	0/0:1.84	0/0:1.96	0/0:1.98	0/0:1.94	0/0:2.12	0/0:2.06	0/0:1.72	0/0:2.28	0/0:1.86	0/0:1.76	0/0:1.56	0/0:2.22	0/0:2.08	0/0:1.66	0/0:1.86	0/0:2.04	0/0:2.4	0/0:1.98	0/0:1.98	0/0:1.52	0/0:1.9	0/0:2.04	0/0:2.28	0/0:2.04	0/1:0.86	0/0:2.08	0/1:1.12	0/0:1.72	0/0:1.78	0/1:0.84	0/0:1.62	0/0:1.9	0/0:1.98	0/0:2.24	0/0:1.86	0/1:0.76	0/0:1.92	0/0:2.06
23	36293501	0.248862	0.102548	GLO1	intronic	23:36293501-36297000	CN0,CN2	0.709621	0/1:1.14	0/1:1.22	0/1:1.14	0/1:1.42	0/1:1.26	1/1:0.04	1/1:0.14	0/0:2.1	0/1:1.22	1/1:0.12	1/1:0.18	0/1:1.26	0/1:1.44	1/1:0.34	1/1:0.1	0/0:2.16	0/1:1.38	0/1:1.3	1/1:0.22	0/1:1.38	0/1:1.08	1/1:0.08	1/1:0.22	0/1:1.44	0/0:2.48	0/0:2.18	0/1:1.22	0/1:1.3	1/1:0.16	0/0:2.4	0/0:2.14	0/0:2.12	0/1:1.34	1/1:0.08	0/0:2.32	0/0:2.28	0/0:2.0	0/1:1.1	0/1:1.0	0/0:2.1	0/0:2.36
23	42841501	0.0332085	0.0115406	TINAG(dist=200378),FAM83B(dist=258831)	intergenic	23:42841501-42847500	CN0,CN2	0.755664	0/0:2.16	0/1:1.12	0/1:1.14	0/1:1.44	0/0:2.36	0/0:2.02	0/1:1.22	0/0:2.3	0/0:2.02	0/1:0.94	0/1:1.12	0/0:2.08	0/0:2.3	0/1:1.08	0/0:2.46	0/0:2.04	0/0:2.0	0/0:2.04	0/0:2.0	0/0:2.22	0/0:2.04	0/0:2.24	1/1:0.06	0/0:2.12	0/0:2.02	0/0:2.1	0/1:1.06	0/0:2.16	0/0:2.1	0/0:1.98	0/0:2.0	0/0:1.74	0/0:2.28	0/0:2.16	0/0:2.0	0/0:2.0	0/0:1.82	0/0:2.2	0/0:2.28	0/0:2.08	0/0:1.94
23	43044001	-0.00239995	0.00281244	TINAG(dist=402878),FAM83B(dist=58831)	intergenic	23:43044001-43047500	CN0,CN2	0.689636	1/1:0.2	0/1:1.36	0/0:1.68	1/1:0.2	0/1:1.2	0/0:2.02	1/1:0.2	0/1:1.18	0/0:1.92	1/1:0.28	0/0:1.7	0/1:1.04	0/0:1.96	1/1:0.28	1/1:0.4	0/0:2.08	0/0:2.14	0/1:0.92	0/1:1.44	0/1:1.36	1/1:0.24	0/1:1.4	1/1:0.18	1/1:0.46	0/1:1.2	0/0:2.12	1/1:0.36	0/0:1.72	0/1:1.28	0/1:1.16	0/1:1.16	0/1:1.36	1/1:0.26	0/1:1.32	1/1:0.3	0/1:1.08	1/1:0.24	1/1:0.28	0/1:1.4	0/1:1.04	1/1:0.32
23	43191001	0.150987	0.0981104	FAM83B	intronic	23:43191001-43196000	CN0	0.821012	1/1:0.02	0/0:1.98	0/0:1.84	0/1:0.96	0/0:1.94	0/0:1.88	0/1:0.98	0/1:0.98	0/0:2.02	0/1:0.94	0/0:2.08	0/0:2.12	0/0:1.94	0/0:2.1	1/1:0.02	0/1:1.18	0/1:1.04	0/1:0.82	0/1:1.32	0/0:1.6	1/1:0.0	0/1:1.0	0/1:1.22	0/1:1.04	0/0:1.9	0/0:1.88	0/1:1.24	0/1:1.14	0/1:1.04	0/0:1.76	0/0:2.06	0/0:2.46	0/0:1.98	0/0:2.0	0/0:1.94	0/0:1.98	0/0:1.96	0/0:2.18	0/1:1.18	0/0:2.1	0/0:2.2
23	46747001	0.000330921	0.00118751	PRIM2(dist=621833),KHDRBS2(dist=1122421)	intergenic	23:46747001-46750000	CN0	0.735758	0/0:1.88	0/0:1.92	0/0:2.14	0/0:1.86	0/0:1.84	0/0:2.56	0/1:1.1	0/0:1.88	0/1:1.2	0/0:1.86	0/0:1.8	0/0:1.82	0/0:1.92	0/0:2.58	0/0:1.98	0/0:1.76	0/0:1.64	0/0:1.92	0/0:2.16	0/0:2.5	0/0:1.9	0/0:1.76	0/0:1.94	0/0:2.1	0/0:2.08	0/0:2.04	0/0:1.76	0/0:1.88	0/0:1.92	0/1:1.2	0/0:2.16	0/1:0.94	0/0:1.98	0/0:2.26	0/0:1.88	0/0:2.44	0/0:1.76	0/0:1.9	0/0:1.8	0/0:1.76	0/0:1.96
23	46907501	0.0434115	0.00135569	PRIM2(dist=782333),KHDRBS2(dist=947921)	intergenic	23:46907501-46924500	CN0	0.835536	0/0:2.04	0/1:0.96	0/0:2.06	0/0:1.88	1/1:0.06	0/0:1.92	0/0:2.06	0/0:2.32	0/1:1.12	0/0:1.98	0/0:1.98	0/1:1.12	0/0:2.08	0/0:1.72	0/0:2.08	0/0:2.04	0/1:1.02	0/0:2.16	0/0:2.22	0/0:2.16	0/0:1.96	0/0:2.1	0/1:1.16	0/0:1.88	0/1:1.04	0/0:2.1	0/0:2.14	0/0:1.68	0/0:2.04	0/0:1.98	0/0:1.76	0/0:1.76	0/0:2.0	0/0:1.74	0/0:1.92	1/1:0.0	0/0:1.82	0/0:2.1	0/0:1.86	0/0:1.98	0/0:1.9
23	47222001	0.0609333	0.0185085	PRIM2(dist=1096833),KHDRBS2(dist=643921)	intergenic	23:47222001-47228500	CN0,CN2	0.657822	0/0:2.08	0/0:2.24	0/0:2.34	0/0:2.26	0/0:2.18	0/0:2.24	0/0:2.18	0/2:2.5	0/0:2.14	0/2:2.58	0/0:2.0	0/0:2.0	0/2:3.02	0/2:2.8	0/0:2.36	0/0:2.04	0/0:2.08	0/0:2.32	0/0:2.18	2/2:3.74	0/0:2.2	0/0:2.14	0/0:2.3	0/0:2.26	0/0:2.2	2/2:4.5	0/0:1.78	0/2:3.32	0/2:3.1	0/2:2.74	0/0:1.86	0/0:1.86	0/0:2.26	0/0:2.24	0/0:2.14	0/0:2.1	0/0:1.9	0/0:2.34	0/0:2.06	0/1:1.12	0/0:1.92
23	47382001	0.0109556	0.00920368	PRIM2(dist=1256833),KHDRBS2(dist=480421)	intergenic	23:47382001-47392000	CN0	0.905969	1/1:0.2	1/1:0.12	1/1:0.08	1/1:0.04	1/1:0.2	1/1:0.14	0/1:1.22	0/1:1.32	1/1:0.14	1/1:0.12	0/1:1.3	1/1:0.16	1/1:0.06	1/1:0.14	1/1:0.16	0/1:1.34	0/1:1.16	1/1:0.2	0/1:1.34	1/1:0.28	0/1:1.24	0/1:1.2	1/1:0.16	0/1:1.1	0/1:1.2	1/1:0.1	0/1:1.1	0/1:1.04	1/1:0.08	0/1:1.42	1/1:0.08	1/1:0.16	1/1:0.16	1/1:0.04	0/1:1.18	1/1:0.12	1/1:0.16	1/1:0.08	1/1:0.06	0/1:1.3	1/1:0.14
23	47696501	0.0475504	0.0149099	PRIM2(dist=1571333),KHDRBS2(dist=170921)	intergenic	23:47696501-47701500	CN0	0.815748	0/0:2.04	0/0:2.14	0/0:2.04	0/0:2.0	0/0:2.26	0/1:1.08	0/1:1.0	0/0:2.42	0/0:2.02	1/1:0.04	0/1:1.08	0/1:1.08	0/0:2.04	0/0:2.18	0/0:2.26	0/1:0.92	0/1:1.24	0/1:0.96	0/1:1.06	0/0:1.94	0/0:1.84	0/0:2.06	0/1:0.98	0/0:1.96	0/1:0.84	0/0:2.18	0/0:2.04	0/1:0.86	0/0:2.14	0/0:1.8	0/0:1.96	0/0:1.78	0/0:1.94	0/0:2.02	0/0:2.12	0/0:1.94	0/0:1.96	0/0:1.86	0/0:1.86	0/0:1.94	0/0:1.88
23	47745501	0.00869369	-0.00525483	PRIM2(dist=1620333),KHDRBS2(dist=122921)	intergenic	23:47745501-47749500	CN0	0.770803	0/0:2.12	0/0:2.18	0/0:2.06	0/1:1.12	0/0:2.1	0/1:1.42	0/1:1.2	0/0:2.5	0/0:2.14	1/1:0.04	0/1:1.0	0/1:1.08	0/0:2.08	0/1:1.2	0/0:2.54	0/1:1.22	0/1:0.86	0/1:1.38	0/1:1.4	0/0:2.56	0/0:2.16	0/0:2.18	0/1:1.12	0/0:2.02	0/1:1.1	0/0:2.06	0/0:2.74	0/1:0.84	0/0:1.82	0/1:0.9	1/1:0.0	0/1:0.86	0/0:2.14	0/0:1.84	0/0:1.96	0/0:1.9	0/0:2.06	0/0:2.32	0/1:1.18	0/0:1.86	0/0:1.64
23	48432501	-0.00222374	0.000416646	KHDRBS2	intronic	23:48432501-48436000	CN0	0.676508	0/0:1.84	0/0:1.98	1/1:0.34	0/0:1.86	0/0:1.98	0/0:1.98	0/1:1.26	0/0:2.36	0/1:0.98	0/0:1.8	0/1:1.1	0/0:1.94	0/0:2.04	0/0:2.44	0/0:2.14	0/0:2.34	0/1:1.02	0/1:1.26	0/0:1.76	0/1:1.32	0/1:1.36	0/1:1.4	0/0:2.38	0/0:1.52	0/0:1.56	0/0:2.02	0/1:1.1	0/0:2.16	0/0:2.06	0/1:1.32	0/0:2.06	0/0:1.86	0/0:1.62	0/0:2.16	0/0:2.2	0/0:2.18	0/0:2.1	0/0:1.96	0/0:1.82	0/0:2.14	0/0:2.3
24	83501	0.00646978	-0.00212585	LOC102185965(dist=6454),LOC106503527(dist=18155)	intergenic	24:83501-89500	CN0	0.791166	0/0:2.1	0/1:1.18	0/1:1.02	0/1:1.38	0/1:1.32	0/0:1.62	0/0:2.14	0/1:1.02	0/0:1.88	0/0:1.98	0/1:1.48	0/1:0.98	1/1:0.04	0/1:1.52	0/1:1.26	1/1:0.04	1/1:0.08	0/1:1.24	0/0:1.94	0/0:2.28	0/1:1.04	0/0:2.08	0/1:1.16	0/1:0.88	0/0:2.24	0/1:1.3	0/1:0.96	0/0:1.86	0/1:1.02	0/0:1.94	0/0:2.06	0/1:1.18	0/0:2.06	0/1:1.1	0/0:1.82	0/0:1.94	0/1:1.12	0/0:1.8	0/0:2.02	0/0:2.04	0/1:1.36
24	184501	0.00626178	0.0247882	LOC106503527(dist=75915),PARD6G(dist=35161)	intergenic	24:184501-187000	CN0	0.650927	0/1:0.96	0/0:1.76	0/0:1.76	0/0:1.92	0/0:2.1	0/0:2.58	0/0:1.84	0/0:2.38	0/0:2.14	0/0:1.9	0/0:2.48	0/0:2.06	0/0:1.74	0/0:2.04	0/0:2.2	0/0:2.2	0/0:1.84	0/0:1.86	0/0:1.78	0/0:2.38	0/0:2.18	0/0:2.04	0/0:2.28	0/0:1.88	0/0:1.72	0/0:2.0	0/0:1.6	0/1:1.48	0/0:2.4	0/0:1.6	0/0:2.04	0/0:1.78	0/0:1.84	0/0:1.8	0/0:2.08	0/0:1.66	0/0:1.78	0/0:1.8	0/0:2.16	0/0:1.74	0/0:1.82
24	1315501	0.0844118	0.0510595	LOC102182272	ncRNA_exonic	24:1315501-1322000	CN2	0.669149	0/0:2.36	0/0:2.36	0/1:2.58	0/0:2.22	0/0:2.24	0/1:2.58	0/0:2.06	0/0:2.48	0/0:2.16	0/0:2.16	0/0:2.32	0/0:2.24	0/0:2.24	1/1:3.96	0/0:2.18	0/0:2.24	0/1:2.64	0/0:2.44	0/1:2.56	0/0:2.5	0/0:2.44	0/0:2.16	0/0:2.34	0/0:2.26	0/0:2.38	0/0:2.22	0/1:3.28	0/0:2.0	0/1:2.64	0/0:2.28	0/0:2.0	0/0:2.28	0/0:2.22	0/0:2.22	0/0:2.14	0/0:1.72	0/0:2.36	0/0:2.24	0/0:2.12	0/0:2.18	0/0:2.38
24	4110001	-0.000715739	0.0163232	FAM69C(dist=32436),C24H18orf63(dist=11278)	intergenic	24:4110001-4114000	CN0,CN2	0.716333	0/1:0.9	0/0:1.76	0/1:0.82	0/1:0.88	0/1:1.08	0/1:0.98	0/1:1.02	0/1:1.08	0/1:0.8	0/1:0.92	0/0:2.04	0/1:0.84	0/1:0.92	0/1:1.38	0/1:0.96	0/1:0.76	0/1:0.94	0/1:0.96	0/1:0.82	0/1:1.1	0/1:0.88	0/1:1.12	0/1:0.84	0/1:0.84	0/1:1.12	0/1:1.32	0/1:1.02	0/1:1.04	0/1:1.08	0/1:0.72	0/1:0.74	0/0:1.46	0/1:0.78	0/1:0.7	0/1:0.64	0/1:1.38	0/1:1.34	0/0:1.76	0/1:0.74	0/0:1.5	0/1:0.74
24	9815501	0.113649	0.104808	DSEL(dist=212295),CDH19(dist=455341)	intergenic	24:9815501-9852000	CN0,CN2	0.851604	0/0:1.94	0/0:1.88	0/0:1.84	0/0:1.98	0/0:1.9	0/0:1.84	0/0:1.96	0/0:1.94	0/0:1.92	0/0:2.06	0/0:1.94	0/0:2.02	0/0:1.86	0/0:1.98	0/0:1.86	0/0:1.82	0/0:1.74	0/0:1.86	0/0:2.04	0/0:1.9	0/0:2.04	0/0:1.96	0/0:1.98	0/0:1.92	0/0:1.98	0/0:1.86	0/0:1.98	0/0:1.9	0/0:1.9	0/1:0.96	0/1:1.0	0/1:1.06	0/1:1.0	0/1:1.04	0/1:1.04	0/1:1.06	0/1:1.0	0/1:1.06	0/1:1.1	0/1:1.02	0/1:1.14
24	12879001	0.00989561	0.0234851	SYT4(dist=93166),LOC102171118(dist=1038963)	intergenic	24:12879001-12882500	CN0,CN2	0.664759	0/0:2.2	0/1:1.34	0/2:2.62	0/0:1.56	0/0:2.2	0/2:2.76	0/0:2.14	0/2:2.92	0/0:2.12	0/0:2.06	0/0:2.1	0/0:2.02	0/1:1.06	0/0:1.64	0/0:2.16	0/0:2.14	0/0:2.0	0/0:2.1	0/1:1.32	0/1:1.08	0/0:2.4	0/0:2.02	0/0:2.04	0/1:1.28	0/0:2.06	0/0:2.04	0/0:1.9	0/0:2.38	0/0:1.78	0/1:0.96	0/0:2.08	0/0:2.06	0/1:0.94	0/0:1.92	0/0:1.86	0/0:1.9	0/0:1.9	0/0:2.08	0/0:1.82	0/0:2.24	0/0:1.66
24	12909501	-0.00872977	0.00155587	SYT4(dist=123666),LOC102171118(dist=1006463)	intergenic	24:12909501-12915000	CN0	0.782903	0/0:2.1	0/0:1.94	0/0:1.9	0/0:1.78	0/0:1.82	0/0:2.26	0/0:2.18	0/0:1.98	0/0:2.06	0/0:2.32	0/0:1.78	0/0:1.96	0/1:1.12	0/0:1.78	0/1:1.24	0/0:2.08	0/0:1.98	0/1:1.14	0/0:1.7	0/1:1.08	0/0:2.12	0/0:2.12	0/0:2.14	0/1:1.08	0/0:2.1	0/0:1.96	0/0:2.14	0/0:2.24	0/1:1.12	1/1:0.04	0/0:1.88	0/0:1.94	0/1:1.02	0/0:1.98	0/0:1.86	0/0:2.12	0/0:2.02	0/0:2.02	0/0:1.7	0/0:2.12	0/0:2.02
24	13412501	0.00354774	0.0065084	SYT4(dist=626666),LOC102171118(dist=505463)	intergenic	24:13412501-13416000	CN0	0.751248	0/0:1.94	0/1:0.96	0/0:1.96	0/1:1.1	0/0:2.14	0/0:1.98	0/0:1.88	0/0:2.04	0/0:1.94	0/0:1.92	0/1:1.34	0/0:2.16	0/1:1.18	0/0:1.56	0/0:2.24	0/1:0.96	0/0:1.98	0/0:2.06	0/0:1.94	0/0:2.1	0/0:2.06	0/1:1.24	0/0:1.96	0/0:1.9	0/1:1.22	0/0:1.8	0/0:2.04	0/0:1.74	0/0:2.02	0/1:1.06	0/0:1.66	0/0:1.82	0/0:1.9	0/0:1.78	0/0:1.98	0/0:1.82	0/0:1.6	0/0:2.0	0/1:0.98	0/0:1.8	1/1:0.4
24	24511001	0.00222169	0.0727315	CCDC178(dist=11269),LOC108633811(dist=169936)	intergenic	24:24511001-24516000	CN0,CN2	0.657338	0/2:3.0	0/2:3.12	0/2:2.62	0/2:3.22	0/2:3.24	0/2:3.74	0/2:3.54	0/2:3.5	0/2:3.28	0/2:3.08	0/2:3.26	0/2:3.08	0/2:3.14	0/2:3.54	0/2:3.6	0/2:2.76	0/2:3.08	0/2:2.84	0/2:2.64	0/2:2.98	0/2:2.86	0/2:3.22	0/2:3.04	0/2:2.82	0/2:3.62	0/2:3.46	0/2:2.74	0/2:3.52	0/2:2.94	0/2:3.0	0/2:2.56	0/2:2.72	0/2:2.62	0/2:2.66	0/0:1.78	0/1:0.68	0/0:1.64	0/1:0.74	0/2:2.92	0/1:0.84	0/2:2.96
24	26081501	0.0244757	0.00912809	DSG1(XM_018039432.1:c.*3822_*2923delins0)	UTR3	24:26081501-26086500	CN2	0.755075	0/0:2.2	0/0:2.02	0/0:1.84	0/1:2.9	0/0:1.78	0/0:2.18	0/0:2.04	0/0:1.56	0/0:2.12	0/1:2.94	0/0:2.14	0/0:1.88	0/0:1.98	0/0:1.96	0/0:1.94	0/1:2.68	0/0:2.54	0/0:1.66	0/0:2.38	0/0:1.76	0/1:3.2	0/0:1.98	0/0:1.9	0/1:2.92	0/0:2.0	0/1:2.78	0/1:2.86	0/0:2.4	0/0:1.88	0/0:1.74	0/0:2.06	0/0:2.16	0/0:1.98	0/0:1.86	0/0:1.84	0/0:2.16	0/0:2.08	0/0:2.16	0/0:1.92	0/0:2.08	0/0:2.14
24	27602501	-0.00114575	-0.000247301	LOC108633784(dist=741400),TRNAS-GGA(dist=645079)	intergenic	24:27602501-27607500	CN0	0.741536	0/0:1.9	0/0:1.66	0/0:1.94	0/0:2.3	0/0:1.92	0/1:1.24	0/0:2.08	0/0:1.76	0/0:1.9	0/0:2.34	0/0:2.6	0/0:2.02	0/0:1.94	0/0:2.02	0/0:2.24	0/0:1.72	0/1:0.82	0/0:2.22	0/1:1.36	0/1:1.22	0/0:1.64	0/0:1.84	0/0:2.14	0/0:1.92	0/0:2.1	0/0:1.98	0/0:2.24	0/0:2.3	0/1:1.34	0/1:1.24	0/0:1.88	0/0:2.22	0/0:1.92	0/0:2.16	0/0:1.88	0/0:2.04	0/0:1.98	0/0:2.1	0/1:1.12	0/0:2.08	0/0:2.72
24	36063501	0.00395047	9.4211e-05	TRNAC-GCA(dist=45697),ADCYAP1(dist=9869)	intergenic	24:36063501-36076500	CN2,CNH	0.795005	0/0:2.08	0/0:2.1	0/0:1.98	0/0:2.06	0/0:2.3	0/0:2.12	0/0:2.14	0/0:2.28	0/0:2.06	0/0:2.12	0/0:2.18	0/0:2.04	0/0:2.2	0/0:1.92	0/0:2.14	0/0:2.08	0/0:2.1	0/0:2.06	0/0:2.32	0/0:2.08	0/0:1.98	0/0:2.12	0/0:2.02	0/0:2.06	0/0:2.04	0/0:2.3	0/0:1.96	1/1:4.12	0/0:1.88	0/0:2.02	0/0:1.9	0/0:1.8	0/0:2.1	0/0:1.96	0/0:2.2	0/0:2.0	0/0:1.92	0/0:2.16	0/0:2.0	0/0:1.94	0/0:2.28
24	40537501	-0.00468262	0.000351122	LRRC30(dist=47730),PTPRM(dist=146884)	intergenic	24:40537501-40543000	CN0	0.786972	0/0:1.98	0/0:2.06	0/1:0.76	0/0:2.3	0/0:2.18	0/0:2.24	0/0:1.84	0/1:1.02	0/0:1.72	0/0:1.7	0/0:2.02	0/0:2.0	0/0:2.14	0/0:1.56	0/0:2.08	0/1:0.94	0/0:2.06	0/1:1.08	0/0:2.0	0/0:1.88	0/1:1.06	0/0:1.96	0/0:1.9	0/1:0.88	0/1:0.98	0/0:1.98	0/0:1.8	0/0:1.88	0/0:2.3	0/0:2.18	0/0:1.94	0/0:2.02	0/0:2.06	0/0:1.96	0/0:2.28	0/0:1.78	0/0:1.74	0/0:2.06	0/0:1.84	0/0:2.04	0/0:1.96
24	53001501	0.0385188	0.0356759	LOC108633779	intronic	24:53001501-53006500	CN0	0.825874	0/1:1.14	0/0:2.14	0/1:1.08	0/0:1.9	0/0:2.24	0/0:2.34	0/0:2.1	0/0:2.4	0/1:1.08	1/1:0.04	0/0:1.96	0/0:2.1	0/1:1.06	0/0:2.38	0/0:2.18	0/0:1.96	0/0:2.4	0/0:2.12	0/0:2.14	0/0:2.24	0/0:1.9	0/0:1.94	0/0:2.14	0/0:2.0	0/0:2.14	0/0:2.22	0/0:2.26	0/0:2.18	0/0:2.22	0/0:2.08	0/0:2.06	0/0:1.98	0/0:2.02	0/0:1.76	0/0:2.06	0/0:2.1	0/0:1.9	0/0:2.32	0/0:1.96	0/0:1.92	0/0:1.96
24	61644501	0.013123	0.0527048	BCL2	intronic	24:61644501-61648000	CN2	0.693614	0/0:1.6	0/0:1.72	0/0:1.98	0/0:1.92	0/0:1.76	0/0:2.1	0/0:1.64	0/0:1.78	0/0:1.76	0/0:1.86	0/0:1.98	0/0:1.96	0/0:1.88	0/1:2.72	0/0:1.92	0/0:1.56	0/0:1.68	0/0:1.42	0/0:2.0	0/0:1.9	0/0:1.5	0/0:1.84	0/0:1.6	0/0:1.62	0/0:2.38	0/0:1.96	0/0:1.72	0/0:1.72	0/0:1.78	0/0:2.32	0/0:1.96	0/0:2.18	0/0:2.04	0/0:1.78	0/0:1.74	0/0:1.82	0/0:1.5	0/0:1.94	0/0:1.98	0/0:2.02	0/0:2.06
24	62081501	0.275197	0.280704	LOC108633804	ncRNA_intronic	24:62081501-62084000	CN0	0.735863	0/1:0.58	1/1:0.22	1/1:0.4	1/1:0.26	0/1:0.54	0/1:0.56	1/1:0.46	0/1:0.56	1/1:0.26	1/1:0.32	1/1:0.42	1/1:0.3	0/1:0.62	0/1:0.94	0/1:0.62	1/1:0.14	1/1:0.44	1/1:0.16	1/1:0.36	0/1:0.62	1/1:0.24	0/1:0.64	0/1:0.62	1/1:0.36	0/1:0.74	0/1:0.94	0/1:0.54	0/1:0.56	1/1:0.36	1/1:0.08	1/1:0.08	1/1:0.16	1/1:0.2	1/1:0.22	1/1:0.22	1/1:0.2	1/1:0.04	1/1:0.08	1/1:0.18	1/1:0.14	1/1:0.32
24	62232501	0.0630818	0.0184138	SERPINB7(dist=45218),LOC102181552(dist=19091)	intergenic	24:62232501-62241000	CN0,CN2,CNH	0.707937	0/1:1.12	0/1:1.08	1/1:0.14	1/1:0.06	1/1:0.14	1/1:0.26	1/1:0.18	0/1:1.24	1/1:0.26	1/1:0.44	2/3:4.5	1/1:0.32	1/1:0.16	1/1:0.16	1/1:0.22	0/1:0.88	1/1:0.16	1/1:0.16	1/1:0.22	1/1:0.2	1/1:0.2	0/1:1.18	0/1:0.6	0/1:0.5	1/1:0.34	1/1:0.16	1/1:0.08	0/1:1.28	1/1:0.42	0/1:0.94	0/1:0.64	0/1:1.1	0/1:0.48	0/1:1.34	0/1:1.22	0/1:1.16	0/1:1.38	0/1:0.92	0/0:1.84	0/1:0.96	0/1:1.14
25	438001	0.00497803	-0.00209823	PIGQ,RAB40C	exonic	25:438001-458500	CN2	0.657041	0/0:2.36	0/0:2.2	0/0:2.34	0/0:2.18	0/0:1.94	0/0:2.2	0/0:2.14	0/0:1.94	0/0:2.38	0/0:2.14	0/0:1.96	0/0:2.2	0/0:2.2	0/0:2.08	0/0:2.06	0/0:2.36	0/0:2.28	0/0:2.26	0/0:2.14	0/0:2.34	0/0:2.36	0/0:2.2	0/0:2.22	0/0:2.42	0/0:2.3	0/0:2.06	0/0:2.28	0/0:2.24	0/0:2.26	0/1:2.8	0/0:2.28	0/1:2.7	0/0:2.26	0/0:2.2	0/0:2.14	0/0:2.26	0/0:2.28	0/0:2.12	0/0:2.26	0/0:2.16	0/0:2.2
25	14628001	0.0119966	0.00950521	LOC102178324(dist=160961),XYLT1(dist=750210)	intergenic	25:14628001-14647000	CN2	0.822858	0/1:3.02	0/1:2.96	0/1:2.98	0/0:2.34	0/0:2.3	0/0:2.18	0/0:2.2	0/0:2.1	0/1:3.12	0/0:2.1	0/0:2.12	0/1:2.88	0/0:2.22	0/0:2.28	0/0:2.44	0/0:2.08	0/1:3.06	0/0:2.1	0/0:2.32	0/0:2.38	0/0:2.16	0/1:3.16	0/0:2.26	0/0:2.06	0/0:2.2	0/0:2.16	0/0:2.12	0/0:2.22	0/0:2.18	0/0:2.14	0/0:1.96	0/0:1.96	0/0:2.26	0/0:2.12	0/0:2.18	0/0:2.1	0/0:1.98	0/0:2.26	0/0:2.4	0/0:2.06	0/1:2.66
25	14909001	0.0454084	0.0313369	LOC102178324(dist=441961),XYLT1(dist=471210)	intergenic	25:14909001-14926000	CN0	0.898599	0/0:1.98	0/0:2.1	0/0:1.78	0/0:2.14	0/0:2.04	0/0:2.12	0/0:2.06	0/0:2.26	0/0:2.08	0/0:2.08	0/0:1.82	0/0:1.94	0/0:2.02	0/0:2.12	0/0:2.06	0/0:2.0	0/0:2.08	0/0:2.12	0/0:1.9	0/0:2.06	0/0:2.04	0/0:2.04	0/0:2.06	0/0:1.92	0/0:2.24	0/0:2.0	0/0:2.08	0/0:1.96	0/0:2.12	0/0:2.1	0/0:2.12	0/0:1.84	0/0:2.12	0/0:1.96	0/0:2.02	0/0:1.9	0/0:1.98	0/0:2.04	0/0:2.06	0/0:2.06	0/0:2.08
25	23436501	0.0731504	0.0225481	HS3ST4	intronic	25:23436501-23440500	CN0	0.803234	0/1:1.1	0/0:1.88	0/0:2.1	0/0:1.64	0/1:1.22	0/1:0.92	0/0:2.08	0/1:1.34	0/1:1.04	1/1:0.04	0/1:0.86	0/1:1.06	1/1:0.04	0/0:2.16	0/0:2.12	0/1:1.02	0/1:1.06	0/0:2.16	1/1:0.04	0/1:0.92	0/1:1.02	0/1:0.94	1/1:0.02	0/1:1.12	0/0:2.36	0/1:1.3	0/1:1.1	0/0:1.98	0/0:1.96	0/0:1.96	0/0:2.02	0/0:1.68	0/0:2.02	0/0:1.94	0/0:2.08	0/0:1.96	0/0:1.84	0/0:2.16	0/1:1.12	0/1:1.04	0/0:2.24
25	23887501	-0.00957673	-0.00323611	TRNAC-GCA(dist=5998),LOC108633855(dist=374917)	intergenic	25:23887501-23891500	CN0	0.785782	0/1:1.44	1/1:0.14	0/0:2.42	0/0:1.58	1/1:0.24	0/0:2.38	0/1:1.16	0/0:2.14	0/1:1.1	0/0:2.02	0/0:1.88	0/1:1.32	0/1:1.32	0/1:0.6	0/0:2.46	1/1:0.08	0/0:2.02	1/1:0.26	1/1:0.14	0/1:1.3	0/1:1.08	0/0:2.36	1/1:0.24	1/1:0.2	0/1:0.9	0/1:1.3	1/1:0.2	0/0:2.5	0/0:2.32	0/1:1.2	0/0:1.88	0/0:1.78	0/0:2.24	0/0:1.96	0/0:2.04	0/0:1.78	0/0:1.76	0/0:2.16	0/1:1.4	0/1:1.04	0/1:1.16
25	27782501	-0.00547201	-0.00219211	LOC102174355	exonic	25:27782501-27790500	CN0,CN2	0.680914	0/0:2.14	0/0:2.3	0/0:2.18	0/2:2.76	0/0:2.26	0/0:2.5	0/0:2.22	0/0:2.22	0/0:2.32	0/0:2.24	0/0:2.42	0/0:2.26	0/0:2.38	0/0:2.0	0/0:2.28	0/0:2.18	0/0:2.44	0/0:2.4	0/0:2.48	0/2:3.5	0/0:2.06	0/0:2.36	0/0:2.3	0/0:2.12	0/0:2.5	0/0:2.42	0/0:1.94	0/2:2.54	0/2:3.42	0/0:2.48	0/0:2.44	0/0:2.26	0/0:2.3	0/0:2.16	0/0:2.26	0/0:2.06	0/0:2.04	0/0:2.24	0/0:2.1	0/0:2.38	0/0:2.22
25	34492001	-0.00361334	0.00143382	LOC102190953	exonic	25:34492001-34502000	CN2	0.796724	0/0:2.0	0/0:1.8	0/1:2.5	0/0:2.18	0/0:1.98	0/1:2.52	0/0:1.94	0/0:1.92	0/0:1.94	0/0:2.04	0/0:1.92	0/1:2.6	0/1:2.78	0/0:1.98	0/0:1.76	0/1:2.62	0/0:1.88	0/1:2.68	0/0:1.98	0/0:2.06	0/0:2.04	0/1:2.66	0/0:1.94	0/0:2.12	0/0:1.96	0/0:1.98	0/1:2.92	0/0:1.78	0/0:2.16	1/1:3.58	0/1:3.08	0/1:2.64	0/1:3.0	0/1:2.88	0/0:2.04	0/0:1.96	0/0:2.04	0/0:1.88	0/0:1.9	0/0:2.08	0/1:3.2
25	34645501	-0.00710677	-0.00440713	LOC102181832	intronic	25:34645501-34649000	CN0	0.712036	0/0:1.74	0/0:1.9	0/0:2.0	0/1:1.12	0/0:1.94	0/1:1.36	0/0:2.08	0/0:1.94	0/0:1.6	1/1:0.0	0/0:2.12	0/0:1.94	0/0:1.88	0/0:2.22	0/1:0.98	0/0:1.6	0/0:1.98	0/0:1.94	1/1:0.0	0/0:2.2	0/0:2.02	0/1:0.9	0/0:1.92	0/1:1.06	0/0:2.14	0/1:0.9	0/0:1.9	0/1:1.16	0/1:0.76	0/0:1.76	0/0:1.82	1/1:0.0	0/1:0.96	0/1:1.14	1/1:0.02	0/1:1.08	0/0:1.86	0/0:1.76	0/0:1.9	0/0:1.78	0/1:1.2
25	34724501	-0.00514194	-0.00117249	LOC102181832	intronic	25:34724501-34730000	CN2	0.767511	0/0:1.78	0/0:1.66	0/1:2.7	0/0:1.88	0/0:2.0	0/1:2.86	0/0:1.84	0/0:2.12	0/0:1.88	0/0:1.94	0/0:2.38	0/1:3.08	0/1:2.84	0/0:2.32	0/0:1.96	0/1:2.78	0/0:2.06	0/1:2.78	0/0:2.04	0/0:1.86	0/0:1.96	0/1:2.76	0/0:1.92	0/0:2.14	0/0:2.2	0/0:1.9	0/1:2.94	0/0:2.32	0/0:1.88	1/1:3.68	0/1:2.72	0/1:2.72	0/1:2.86	0/1:3.3	0/0:1.86	0/0:1.72	0/0:1.72	0/0:2.14	0/0:2.06	0/0:1.7	0/1:3.16
25	34730501	-0.00295325	0.00283907	LOC102181832	intronic	25:34730501-34739000	CN2	0.763433	0/0:1.98	0/0:1.78	0/1:2.9	0/0:1.86	0/0:1.84	0/1:2.86	0/0:1.72	0/0:1.84	0/0:2.02	0/0:1.92	0/0:1.92	0/1:2.9	0/1:2.74	0/0:1.82	0/0:1.92	0/1:2.68	0/0:1.94	0/0:2.32	0/0:1.78	0/0:2.14	0/0:1.96	0/1:2.7	0/0:2.04	0/0:1.78	0/0:2.06	0/0:1.9	0/1:2.88	0/0:1.82	0/0:1.82	1/1:3.78	0/1:2.88	0/1:2.66	0/1:2.98	0/1:2.78	0/0:1.88	0/0:1.9	0/0:2.12	0/0:1.82	0/0:2.08	0/0:2.1	0/1:3.06
25	34762001	-0.00684726	-0.0025731	LOC102181832	intronic	25:34762001-34766500	CN2	0.697971	0/0:2.1	0/0:1.98	0/1:2.72	0/0:2.2	0/0:2.36	0/1:3.22	0/0:2.08	0/0:2.28	0/0:1.88	0/0:1.94	0/0:1.88	0/1:3.06	0/1:3.34	0/0:1.96	0/0:1.98	0/1:2.62	0/0:2.36	0/1:2.96	0/0:2.18	0/1:2.52	0/0:2.16	0/1:2.92	0/0:2.06	0/0:2.06	0/0:2.2	0/0:2.36	0/1:3.28	0/0:1.94	0/0:2.2	1/1:3.88	0/1:3.02	0/1:2.9	0/1:2.8	0/1:3.36	0/0:1.86	0/0:2.16	0/0:1.94	0/0:2.32	0/0:2.04	0/0:1.86	0/1:2.92
25	36568001	-0.00840166	-0.00332565	LOC102170961	exonic	25:36568001-36572000	CN0	0.735633	0/1:1.0	0/1:1.04	0/0:1.94	0/1:0.86	0/1:1.18	0/1:0.96	0/0:1.82	0/1:0.84	0/0:1.68	0/0:1.52	0/1:0.92	0/1:1.04	0/0:2.02	0/0:1.52	0/0:2.14	0/0:1.88	0/1:1.02	0/0:1.6	0/1:0.92	0/0:1.6	0/1:1.1	0/1:0.9	0/0:1.98	0/1:1.1	0/0:1.78	0/0:1.88	1/1:0.02	0/0:1.9	0/0:1.52	0/1:1.02	0/0:1.96	0/0:1.86	0/1:1.0	0/0:1.58	0/1:1.02	0/0:1.9	0/0:1.86	0/0:1.7	0/0:2.22	0/1:0.98	0/0:1.84
25	38065501	0.0164108	-0.00216158	SMURF1	intronic	25:38065501-38067500	CN0,CN2	0.679005	0/0:1.72	0/0:1.5	0/0:2.16	0/0:1.84	0/0:2.14	0/0:2.1	0/0:1.94	0/0:2.06	0/1:0.9	0/0:2.14	0/0:1.82	0/0:2.0	0/0:2.06	0/0:1.76	0/0:1.78	0/0:2.06	0/0:2.26	0/0:2.2	0/0:1.52	0/0:1.48	0/0:1.82	0/0:1.9	0/0:1.92	0/0:2.16	0/0:1.88	0/0:2.04	0/0:2.22	0/0:1.9	0/0:2.46	0/0:2.24	0/0:2.1	0/0:2.3	0/0:2.56	0/0:2.28	0/0:2.26	0/0:2.12	0/0:1.56	0/0:2.18	0/0:2.08	0/0:2.22	0/0:2.54
26	2181001	0.0995154	0.0406219	LOC102184588	ncRNA_exonic	26:2181001-2184000	CN0,CN2	0.686936	0/1:1.16	0/0:2.16	0/0:1.88	0/1:1.24	0/0:1.92	0/1:0.76	1/1:0.0	0/0:2.18	0/0:1.94	0/1:1.12	0/0:1.96	0/1:1.14	0/0:2.12	0/1:0.78	0/0:1.78	0/0:1.94	0/1:0.82	0/1:1.14	1/1:0.0	0/1:1.1	1/1:0.0	0/1:0.96	0/1:1.08	1/1:0.3	1/1:0.0	1/1:0.0	0/1:1.08	0/1:1.18	0/0:1.86	0/1:1.08	0/1:1.12	0/1:0.98	0/0:2.24	0/0:2.08	0/0:1.72	0/0:2.04	0/0:2.24	0/0:2.0	0/0:2.02	0/0:2.06	0/0:2.02
26	8803001	-0.00370978	-0.00250046	LOC102181054(dist=125939),TRNAG-GCC(dist=202923)	intergenic	26:8803001-8806000	CN2	0.738384	0/0:2.04	0/0:2.18	0/0:2.38	0/0:1.78	0/0:2.18	0/0:2.5	0/0:1.98	0/0:2.44	0/0:1.94	0/0:1.86	0/0:2.16	0/0:2.12	0/0:1.96	0/1:2.94	0/0:2.26	0/0:2.02	0/0:1.96	0/0:2.1	0/0:1.88	0/0:1.94	0/0:1.98	0/0:2.02	0/0:1.94	0/0:1.8	0/0:1.74	0/0:2.14	0/0:2.04	0/0:2.08	0/0:2.04	0/0:2.16	0/0:2.14	0/0:2.08	0/1:3.32	0/0:1.92	1/1:3.74	0/1:3.02	1/1:3.8	0/1:2.72	0/0:2.22	0/1:2.9	0/0:2.38
26	11146501	-0.00209691	-0.000581096	WDR11	upstream	26:11146501-11153500	CN0	0.891624	0/1:1.24	0/1:1.08	1/1:0.08	1/1:0.08	1/1:0.08	1/1:0.04	1/1:0.1	0/1:1.08	0/0:2.08	0/1:1.14	1/1:0.04	0/1:1.22	1/1:0.14	0/1:1.0	1/1:0.12	1/1:0.12	1/1:0.08	1/1:0.06	0/1:0.92	1/1:0.16	0/1:1.28	0/1:1.22	1/1:0.06	1/1:0.1	1/1:0.04	0/1:1.24	0/0:2.22	1/1:0.14	0/1:1.12	0/0:1.86	0/1:1.18	1/1:0.06	0/0:2.08	0/0:2.22	1/1:0.3	0/1:1.14	0/0:2.06	0/0:2.08	0/0:2.02	0/1:1.06	0/0:2.3
26	16425501	0.0515582	0.0352275	ATRNL1	intronic	26:16425501-16430000	CN0,CN2	0.815827	0/1:1.24	0/0:2.26	1/1:0.08	1/1:0.32	0/0:1.58	1/1:0.32	1/1:0.36	0/0:2.5	1/1:0.2	0/0:2.26	1/1:0.3	0/0:1.64	0/0:2.32	0/2:3.32	1/1:0.4	1/1:0.18	0/1:1.18	0/0:2.02	0/0:2.78	0/0:1.58	0/1:1.4	0/0:2.34	0/1:1.32	0/0:1.98	0/1:0.92	0/1:1.34	0/0:2.42	0/1:1.2	0/1:1.22	0/0:2.14	1/1:0.26	1/1:0.2	0/0:2.1	1/1:0.18	0/0:2.3	0/0:1.92	1/1:0.18	0/1:1.18	0/1:1.1	0/1:1.2	0/1:1.02
26	20174001	-0.003127	0.00199525	GPAM(dist=856738),ADRA2A(dist=247198)	intergenic	26:20174001-20178500	CN0,CN2	0.791145	0/0:2.22	0/1:1.18	0/0:2.16	1/1:0.16	0/1:1.18	0/0:1.84	1/1:0.2	0/1:1.32	0/1:1.32	0/0:2.48	0/1:0.94	0/0:2.04	0/0:2.2	1/1:0.34	1/1:0.2	0/0:1.9	0/1:0.86	0/0:1.6	0/1:1.32	1/1:0.3	0/0:2.22	0/0:2.26	0/1:1.26	0/0:2.04	0/1:1.2	0/1:1.18	0/1:1.1	0/0:2.04	0/1:1.18	0/1:1.14	0/1:0.98	1/1:0.12	1/1:0.16	1/1:0.14	0/1:0.92	0/0:2.04	0/1:1.04	1/1:0.18	1/1:0.16	0/1:1.08	1/1:0.16
26	20179501	-0.00368155	0.00749289	GPAM(dist=862238),ADRA2A(dist=241698)	intergenic	26:20179501-20184000	CN0,CN2	0.683451	0/0:2.2	0/1:1.14	0/0:2.2	1/1:0.16	0/1:1.34	0/0:2.28	1/1:0.14	0/1:1.04	0/1:1.0	0/0:2.18	0/1:1.28	0/0:2.1	0/0:2.24	1/1:0.2	1/1:0.22	0/0:2.08	0/0:1.44	0/1:0.96	0/1:1.26	1/1:0.2	0/0:2.36	0/0:2.28	0/1:1.18	0/0:2.26	0/1:1.2	0/1:1.06	0/1:1.12	0/0:2.48	0/1:1.42	0/1:1.1	0/1:0.96	1/1:0.08	1/1:0.06	1/1:0.06	0/1:1.2	0/0:1.94	0/1:1.04	1/1:0.08	1/1:0.08	0/1:1.04	1/1:0.12
26	23573001	-0.00924519	0.00346265	LOC102168798(dist=269170),TRNAW-CCA(dist=86787)	intergenic	26:23573001-23576000	CN0	0.749826	0/0:2.38	0/0:2.16	0/0:2.36	0/0:2.04	0/0:2.1	0/0:1.9	0/0:2.14	0/0:2.3	0/0:2.2	0/0:2.08	0/0:1.84	0/0:2.34	0/0:2.06	0/0:1.74	0/0:2.36	0/0:1.92	0/0:2.14	0/0:1.74	0/0:1.84	0/0:2.74	0/0:2.14	0/0:2.42	0/0:2.12	0/0:2.12	0/0:1.62	0/0:2.34	0/1:1.26	0/0:2.1	0/0:2.32	0/0:2.24	0/1:0.86	0/0:2.06	0/0:2.16	1/1:0.04	0/0:1.88	0/0:2.1	0/0:2.04	0/0:1.96	0/1:1.0	0/1:1.02	0/1:1.2
26	24642001	0.00993418	0.0189655	LOC102178169(dist=91324),SORCS3(dist=1241651)	intergenic	26:24642001-24650000	CN0	0.812696	0/0:2.32	0/0:1.96	0/0:1.82	0/0:2.14	0/0:2.08	0/0:2.24	0/0:1.84	0/0:2.22	0/1:0.98	0/0:2.14	0/0:2.22	0/0:2.08	0/0:2.06	0/0:1.96	0/0:2.32	0/0:2.2	0/0:1.94	0/0:2.22	0/0:2.5	0/0:2.04	0/0:2.28	0/0:2.14	0/0:2.16	0/0:2.14	0/0:2.3	0/0:2.24	0/0:2.1	0/0:2.42	0/0:2.1	0/0:1.82	0/0:2.0	0/0:1.98	0/0:2.1	0/0:2.1	0/0:2.02	0/0:2.02	0/0:2.12	0/0:2.26	0/0:2.28	0/0:2.08	0/1:1.36
26	24892501	0.0319031	0.0251778	LOC102178169(dist=341824),SORCS3(dist=996151)	intergenic	26:24892501-24895500	CN0	0.692546	0/0:1.8	0/0:1.9	0/0:1.7	0/0:1.98	0/0:1.88	0/0:2.04	0/1:1.0	0/0:1.58	0/0:1.8	0/0:1.82	0/1:1.12	0/0:1.82	0/0:1.98	0/1:1.1	0/0:1.7	0/0:1.94	0/1:1.04	0/0:1.74	0/0:1.68	0/1:1.02	0/0:1.88	0/0:2.0	0/1:1.3	0/0:2.04	0/0:1.64	0/1:0.92	0/0:1.84	0/0:1.48	0/1:0.82	0/0:1.68	0/0:1.72	0/0:2.06	0/0:2.14	0/0:2.16	0/0:1.9	0/0:1.86	0/0:1.9	0/0:1.96	0/0:2.42	0/0:1.86	0/0:2.18
26	28307001	0.000163926	0.000698051	WBP1L	exonic	26:28307001-28314000	CN2	0.660233	0/0:2.28	0/0:1.94	0/0:2.18	0/1:2.5	0/0:2.06	0/0:2.4	0/0:2.08	0/0:2.1	0/0:2.08	0/0:2.32	0/0:2.26	0/0:2.12	0/0:2.24	0/0:1.94	0/0:1.84	0/0:2.24	0/0:2.26	0/0:2.36	0/0:2.34	0/0:2.32	0/0:2.28	0/0:2.1	0/0:2.12	0/0:2.18	0/0:2.46	0/1:2.52	0/0:2.08	0/0:2.0	0/0:1.86	0/0:2.34	0/0:2.44	0/1:2.48	0/0:2.12	0/0:2.34	0/0:2.46	0/0:2.12	0/0:2.2	0/0:2.0	0/0:1.9	0/0:1.92	0/0:2.06
26	34339501	0.126766	0.0777062	ENTPD1	intronic	26:34339501-34342500	CN2	0.660944	0/0:2.18	0/0:2.1	0/1:2.72	0/0:2.1	0/1:3.0	0/1:3.0	1/1:3.7	0/0:2.52	0/0:2.1	0/0:2.42	0/1:2.98	0/0:1.94	0/0:2.12	0/0:2.04	0/0:2.28	0/1:3.24	0/1:2.86	0/1:3.26	1/1:3.54	0/0:2.22	0/1:2.94	0/0:2.0	0/0:2.16	1/1:3.54	0/0:2.6	0/0:2.06	0/0:2.16	0/0:2.28	0/0:2.44	0/0:1.86	0/0:2.64	0/0:2.12	0/0:2.16	0/1:3.06	0/0:1.98	0/0:1.96	0/0:2.16	0/0:2.42	0/0:1.88	0/0:2.02	0/0:1.9
26	34914001	-0.0105519	-0.00533535	PDLIM1(dist=73123),LOC108633308(dist=10454)	intergenic	26:34914001-34918000	CN0,CN2	0.698742	0/0:1.9	0/0:1.84	0/0:1.8	0/0:2.26	0/0:2.52	0/0:2.02	0/0:2.28	0/0:2.24	0/0:2.14	1/1:0.06	0/1:1.28	0/1:1.1	0/0:2.12	0/0:1.44	1/1:0.16	0/0:2.22	0/1:0.96	0/1:0.96	0/0:2.0	1/1:0.14	0/1:0.98	0/0:2.06	0/0:2.16	0/0:1.68	0/0:2.48	0/0:2.28	1/1:0.08	0/0:1.92	1/1:0.04	0/0:2.02	0/0:2.0	1/1:0.08	1/1:0.12	0/1:1.12	0/1:1.3	1/1:0.12	0/1:0.8	0/1:1.24	0/0:2.3	1/1:0.04	0/0:1.96
26	35110001	0.00757973	-0.000876762	LOC100861186	exonic	26:35110001-35125500	CN2,CNH	0.694688	0/0:2.2	0/0:2.14	0/0:2.5	0/0:2.44	0/0:2.12	0/0:2.36	0/0:2.12	0/0:2.46	0/0:2.24	0/0:2.18	0/0:2.34	0/0:2.12	0/0:2.32	0/1:2.64	0/0:2.38	0/0:2.2	0/0:2.28	0/0:2.5	0/0:2.3	0/0:2.18	0/0:2.38	0/0:2.24	0/0:2.3	0/0:2.28	0/0:2.26	0/0:2.34	0/0:2.14	0/0:2.12	0/0:2.18	0/0:2.18	0/0:2.16	0/0:1.72	0/0:1.76	0/0:1.74	0/1:2.92	0/0:2.22	0/0:2.12	0/0:1.94	0/0:2.52	0/0:2.24	0/1:2.98
26	35137001	0.0109607	0.0133637	LOC100861186	exonic	26:35137001-35201000	CN0,CN2	0.82906	0/0:2.06	0/0:2.06	0/0:1.98	0/0:2.12	0/0:2.16	0/0:2.04	0/2:2.98	0/0:2.0	0/0:2.08	0/0:2.16	0/2:3.0	0/0:2.1	0/0:2.1	0/0:2.32	0/0:2.3	0/0:2.06	0/0:2.14	0/0:2.1	0/0:2.08	0/1:1.08	0/0:2.08	0/0:2.24	0/0:2.1	0/0:1.98	0/0:2.24	0/0:2.12	0/0:2.06	0/0:2.22	0/1:1.12	0/0:2.08	0/0:2.1	0/2:3.3	2/2:3.7	2/2:3.62	2/2:3.56	0/0:2.1	0/2:2.66	2/2:3.8	0/0:2.2	0/0:2.12	0/0:2.22
26	38071001	-0.00531918	0.00316362	TNKS2(dist=38063),PPP1R3C(dist=82978)	intergenic	26:38071001-38079000	CN0	0.83982	0/0:2.16	0/0:2.0	0/0:1.54	0/1:1.12	0/1:1.2	0/0:2.4	0/0:2.08	0/0:2.26	0/0:2.22	0/0:2.14	0/0:2.12	0/0:2.02	0/0:2.26	0/1:1.22	0/0:2.14	0/0:2.06	0/0:1.94	0/1:1.16	0/0:2.0	0/0:2.1	0/0:2.1	0/0:2.2	0/0:2.08	0/0:2.08	0/0:2.14	0/0:2.0	0/0:2.12	0/0:2.06	0/0:2.24	0/0:2.34	0/0:2.06	0/0:1.62	0/0:2.0	0/0:2.04	0/0:2.22	0/0:2.1	0/0:1.86	0/0:2.32	0/0:2.12	0/0:2.14	0/0:2.14
26	39847001	0.0171318	0.0112048	LOC108634043(dist=125951),KIF20B(dist=61436)	intergenic	26:39847001-39854500	CN0,CN2	0.753857	0/0:1.94	0/0:2.02	0/0:2.3	0/0:2.18	0/0:2.5	0/0:1.88	0/1:0.98	0/0:1.88	0/1:1.08	0/0:1.94	0/0:2.04	0/0:2.08	0/0:2.02	0/0:2.26	0/0:2.42	0/0:2.06	0/0:2.12	0/0:2.18	0/0:2.14	0/0:2.24	0/0:2.2	0/0:2.2	0/0:2.04	0/0:1.98	0/0:2.12	0/0:2.0	0/0:2.04	0/0:2.26	0/0:2.1	0/0:2.28	0/0:2.08	0/1:0.86	1/1:0.0	0/1:1.06	0/0:2.0	0/1:1.18	0/0:1.86	0/1:1.12	0/1:0.98	0/0:2.08	0/0:1.98
26	40999001	0.19311	0.0673695	LOC108634007,LOC108634009	exonic	26:40999001-41084500	CN0,CN2,CNH	0.791718	0/0:2.22	0/0:2.26	0/0:2.3	0/0:2.22	0/0:2.56	0/0:2.34	0/2:3.38	2/2:3.56	0/0:2.3	2/2:3.66	2/2:3.7	0/2:3.3	0/0:2.28	0/2:3.44	0/0:2.58	2/2:4.18	2/2:3.52	0/2:2.86	2/2:4.02	0/0:2.52	0/0:2.3	0/0:2.18	0/0:2.26	0/0:2.44	0/0:2.42	2/2:4.44	0/0:2.68	0/0:2.32	0/0:2.38	0/0:2.18	0/0:2.06	0/0:2.0	0/0:2.18	0/0:2.1	0/0:2.12	0/0:2.06	0/0:2.06	0/0:2.18	0/0:2.08	0/0:2.14	0/0:2.3
26	41191001	0.00331784	0.00529704	LOC102188374	exonic	26:41191001-41198000	CN0	0.853145	0/1:0.94	0/0:2.08	0/0:1.78	0/1:1.1	0/0:2.26	0/0:2.24	0/0:1.96	0/1:0.94	0/0:2.1	0/1:1.1	0/0:2.1	0/0:1.96	0/0:2.06	0/0:2.26	0/0:2.18	0/0:1.84	0/0:1.8	0/0:2.06	0/1:0.82	0/1:1.06	0/0:2.02	0/0:2.06	0/1:1.08	0/0:1.78	0/0:2.32	0/1:1.0	0/0:2.08	0/1:0.92	0/0:2.06	0/1:1.1	0/0:1.96	0/0:1.74	0/0:2.2	0/0:2.24	0/0:1.88	0/0:2.1	0/0:2.02	0/0:1.88	0/0:1.96	0/0:1.94	0/0:2.18
26	41302501	-0.00716468	9.17869e-05	RNLS	intronic	26:41302501-41305500	CN0	0.707642	0/1:1.06	0/0:2.02	0/0:1.96	1/1:0.62	0/1:1.22	0/0:1.84	0/0:1.74	0/0:2.52	0/0:2.12	0/0:1.9	0/0:2.18	0/1:1.16	0/1:1.22	0/0:1.98	1/1:0.28	0/1:1.06	0/0:1.58	0/1:0.88	0/1:1.2	0/1:1.14	0/0:2.16	0/0:1.8	0/1:1.2	0/0:1.94	0/0:1.66	0/0:1.9	0/1:0.88	1/1:0.14	0/0:1.9	0/0:2.46	0/0:2.1	0/0:2.18	0/1:1.12	0/0:2.0	0/0:1.8	0/0:2.24	0/0:1.74	0/0:2.0	0/0:2.02	0/0:2.34	1/1:0.6
26	43570001	-0.00319333	0.0119313	PRKG1	intronic	26:43570001-43597500	CN0,CN2,CNH	0.737111	0/0:2.22	0/0:2.2	0/0:2.12	0/0:2.16	2/2:4.14	0/2:3.1	2/2:4.38	2/2:3.98	0/0:2.36	2/3:5.04	0/2:3.38	0/2:3.1	0/2:2.98	0/0:2.34	2/3:4.64	0/0:2.32	0/2:3.18	2/2:4.32	0/0:2.62	0/2:3.22	0/0:2.32	0/0:2.32	0/0:2.32	0/0:2.28	2/2:4.16	2/2:3.52	2/2:4.26	0/0:2.24	0/2:3.18	0/0:2.2	0/0:2.08	0/0:2.2	0/0:2.22	0/0:2.14	0/0:2.24	0/0:2.24	0/0:2.24	0/0:2.32	0/0:2.2	0/0:2.12	0/0:2.18
26	45387501	0.0513244	0.0351515	MBL2(dist=342302),PCDH15(dist=430646)	intergenic	26:45387501-45391500	CN0	0.753992	0/0:1.88	0/0:1.98	0/0:2.28	0/0:2.08	0/0:2.22	0/0:1.86	0/0:2.2	0/1:1.4	0/0:1.98	0/0:2.08	0/0:2.02	0/0:2.24	0/0:2.04	0/0:2.28	0/0:2.1	0/0:2.16	0/1:0.92	0/0:1.56	0/0:2.36	0/0:1.56	0/0:2.16	0/0:2.1	0/0:1.94	0/0:2.14	0/0:2.2	0/0:2.3	0/0:2.08	0/0:2.4	0/1:1.16	0/0:1.96	0/0:2.0	0/0:1.58	0/0:2.1	0/1:1.24	0/0:2.06	0/0:1.98	0/0:1.82	0/0:2.36	0/1:1.1	0/0:2.26	0/0:2.52
26	46655501	0.0340516	0.0208699	PCDH15	intronic	26:46655501-46664000	CN0,CN2	0.795803	0/0:2.0	0/0:1.98	0/0:2.38	0/0:1.84	0/0:2.02	0/0:2.3	0/0:2.24	0/0:2.06	0/0:1.94	0/0:1.9	0/0:1.92	0/0:2.08	0/0:2.04	0/0:1.78	0/0:1.96	0/0:2.0	0/0:2.2	0/0:2.1	0/0:1.96	0/0:1.92	0/0:2.08	0/0:1.96	0/0:2.18	0/0:1.76	0/0:2.08	0/0:2.04	0/0:2.14	0/0:1.86	0/0:1.98	0/0:1.74	0/1:0.94	0/0:1.92	0/0:2.02	0/1:0.94	0/0:1.9	0/0:2.08	0/0:2.08	0/0:1.84	0/0:2.0	0/0:1.84	0/1:1.26
26	48373001	0.0111988	0.00463041	LOC106503891,LOC108634010,LOC108634035	exonic	26:48373001-48549500	CN0,CN2	0.788435	0/0:2.0	0/0:1.94	0/0:1.9	0/0:1.96	0/0:2.02	0/0:2.0	0/0:1.9	0/0:2.0	0/0:2.1	0/0:2.22	0/0:1.92	0/0:2.02	0/0:1.98	0/0:2.14	0/0:2.02	0/0:2.04	0/0:1.92	0/0:1.96	0/0:2.14	0/0:2.04	0/0:2.02	0/0:2.18	0/0:1.94	0/0:1.92	0/0:2.22	0/2:2.82	0/0:2.02	0/0:2.14	0/0:1.98	0/0:1.98	0/0:2.1	0/0:1.78	0/0:1.78	0/0:1.76	0/0:1.98	0/2:2.84	0/0:1.84	0/0:1.86	0/0:2.12	0/0:2.14	0/0:2.18
26	49444501	0.0296366	0.0274087	ZWINT(dist=522835),IPMK(dist=1520027)	intergenic	26:49444501-49451000	CN0	0.821274	0/0:1.94	0/0:2.0	0/0:1.78	0/0:2.12	0/0:1.92	0/0:2.12	0/0:2.12	0/0:2.08	0/0:2.08	0/0:2.0	0/0:2.02	0/0:2.14	0/0:2.18	0/0:2.18	0/0:2.04	0/0:1.82	0/0:1.96	0/0:2.0	0/0:2.12	0/0:1.98	0/0:2.32	0/0:2.02	0/0:2.04	0/0:1.9	0/0:2.1	0/0:2.12	0/0:1.74	0/0:1.92	0/0:2.08	0/0:2.04	0/0:2.08	0/0:2.02	0/0:1.88	0/0:2.2	0/0:2.16	0/0:2.1	0/0:2.0	0/0:1.98	0/0:2.06	0/0:2.0	0/0:2.28
26	49735001	0.00597623	0.0176189	ZWINT(dist=813335),IPMK(dist=1229527)	intergenic	26:49735001-49741500	CN0,CN2	0.662015	0/0:2.02	0/0:2.12	0/0:2.34	0/1:1.28	0/0:2.2	0/0:2.26	0/0:2.22	0/0:2.16	0/1:1.38	0/0:2.04	0/1:1.26	0/0:2.18	0/1:1.4	0/1:1.38	0/0:2.08	0/1:1.36	0/0:2.02	0/1:0.56	0/0:1.98	0/0:2.28	0/0:2.22	0/0:2.1	0/0:2.18	0/0:2.06	0/1:1.48	0/0:1.56	0/0:2.08	0/1:1.36	0/0:2.22	0/1:1.16	0/0:2.02	0/0:1.84	0/1:1.42	0/0:1.86	0/0:2.02	0/0:2.16	0/1:1.42	0/0:1.76	0/1:1.22	0/1:1.26	0/2:3.0
26	50574001	-0.00769363	-0.00292808	ZWINT(dist=1652335),IPMK(dist=393027)	intergenic	26:50574001-50578000	CN0,CN2	0.742667	0/1:1.16	0/0:2.16	0/1:1.4	0/1:1.34	0/1:1.04	0/0:1.9	0/0:2.34	0/0:1.98	0/0:2.14	0/0:2.08	0/0:1.96	0/0:2.12	0/0:2.28	0/0:2.36	0/1:1.14	0/0:2.16	0/1:0.8	0/0:1.86	0/0:1.96	0/1:1.46	0/0:1.94	0/0:2.12	0/1:1.16	0/0:2.12	0/0:2.6	0/0:2.14	0/0:1.62	0/0:2.12	0/1:1.4	0/0:2.18	0/0:1.96	0/0:2.06	0/0:2.02	0/0:2.18	0/0:2.12	0/0:2.06	0/0:2.14	0/0:1.94	0/0:2.04	0/0:2.08	0/0:2.02
26	50609501	-0.00904453	-0.00354964	ZWINT(dist=1687835),IPMK(dist=352527)	intergenic	26:50609501-50618500	CN0	0.908669	1/1:0.02	0/1:1.04	0/1:0.84	1/1:0.0	0/1:0.96	1/1:0.0	1/1:0.0	0/1:0.9	0/0:2.04	0/0:2.32	1/1:0.0	0/1:1.0	1/1:0.0	0/0:2.18	0/1:1.14	0/0:2.1	0/1:0.9	0/0:2.14	1/1:0.0	1/1:0.0	0/1:1.18	0/0:2.08	1/1:0.0	1/1:0.2	0/1:1.02	0/1:1.12	0/0:2.26	0/1:1.18	1/1:0.0	1/1:0.0	1/1:0.0	1/1:0.0	1/1:0.0	1/1:0.0	1/1:0.0	0/1:0.86	0/1:0.98	1/1:0.0	1/1:0.0	0/1:1.02	0/1:1.22
26	50943501	0.200154	0.076413	NONE(dist=NONE),IPMK(dist=21527)	intergenic	26:50943501-50949500	CN2,CNH	0.725652	0/0:1.98	0/0:2.18	0/0:1.96	0/1:3.0	1/1:3.7	0/1:2.9	0/0:1.94	0/0:2.28	0/0:2.14	0/1:3.34	0/1:3.34	0/1:3.2	0/0:2.14	0/1:3.24	0/0:2.18	0/0:2.32	0/0:2.36	0/0:2.46	0/1:2.74	0/1:3.38	0/0:2.14	1/1:4.46	0/0:2.06	0/0:1.96	0/0:2.1	0/0:2.3	1/1:4.24	0/1:3.18	0/1:3.18	0/0:1.92	0/0:2.1	0/0:2.18	0/0:2.28	0/0:1.98	0/0:2.04	0/0:1.9	0/0:1.9	0/0:2.24	0/0:1.94	0/0:1.84	0/0:2.2
27	85001	0.025702	-0.00167091	NONE(dist=NONE),ZNF385D(dist=890832)	intergenic	27:85001-299500	CN2	0.721871	0/0:2.02	0/0:1.98	0/0:2.06	0/0:2.46	0/0:2.06	1/1:3.42	0/0:2.06	0/1:2.62	1/1:4.0	0/0:2.08	0/0:2.08	0/0:2.42	0/0:2.04	0/0:1.98	0/0:2.14	0/0:2.44	0/0:2.44	0/0:2.02	0/0:2.44	0/1:3.1	0/0:2.4	0/0:2.08	0/0:2.46	0/1:2.72	0/0:2.5	0/0:2.08	0/0:1.94	0/1:3.0	0/0:2.46	0/0:1.94	0/0:2.38	0/0:1.86	0/0:2.42	0/1:2.92	0/1:3.06	0/0:2.38	0/0:2.3	0/1:3.04	0/0:2.54	0/0:2.02	0/1:2.96
27	616001	0.0655563	0.0371288	NONE(dist=NONE),ZNF385D(dist=569832)	intergenic	27:616001-620500	CN0	0.858643	0/1:1.18	0/0:1.94	0/1:1.26	0/1:1.32	1/1:0.22	0/1:1.24	0/0:2.14	0/0:1.96	1/1:0.14	1/1:0.16	1/1:0.12	0/1:1.24	1/1:0.16	0/1:1.48	1/1:0.24	0/0:2.16	0/0:1.96	1/1:0.12	0/1:1.14	1/1:0.22	0/1:1.08	0/1:1.14	0/1:1.2	0/0:1.84	0/1:1.26	0/1:1.16	1/1:0.24	0/1:1.08	0/0:2.26	0/0:1.88	0/1:0.98	0/1:1.2	0/1:1.08	1/1:0.1	0/1:1.24	0/1:1.04	1/1:0.22	1/1:0.18	0/1:1.1	1/1:0.12	0/1:1.32
27	1143001	-0.00588594	-0.00524296	NONE(dist=NONE),ZNF385D(dist=44332)	intergenic	27:1143001-1146000	CN0	0.653727	0/0:1.84	0/0:1.78	0/0:1.76	0/1:0.68	0/1:1.2	0/0:2.08	0/0:1.94	0/0:2.14	0/0:2.0	0/0:1.84	0/0:2.3	0/0:2.14	0/0:1.88	0/0:2.32	0/0:2.0	0/0:1.84	0/0:1.84	0/0:2.06	0/1:1.04	0/0:1.82	0/0:2.08	0/0:1.92	0/1:1.1	0/0:1.84	0/0:2.26	0/0:1.62	0/0:2.08	0/0:2.38	0/0:1.92	0/0:2.24	0/0:1.9	0/1:1.0	0/0:2.12	0/0:1.84	0/0:2.06	0/0:2.22	0/0:1.58	0/0:1.94	0/0:2.26	0/0:2.0	0/0:2.58
27	6444001	-0.0103497	-0.0043532	LRRC3B(dist=91081),LOC102169935(dist=166658)	intergenic	27:6444001-6447500	CN0,CN2	0.691323	1/1:0.18	1/1:0.12	0/0:1.62	0/0:1.54	0/0:2.14	0/0:1.48	1/1:0.16	0/0:2.6	1/1:0.14	0/1:1.26	0/0:2.32	0/1:1.32	0/1:1.34	0/0:2.46	0/1:1.32	1/1:0.16	0/1:0.9	0/0:1.62	0/1:1.04	0/0:2.22	0/1:1.34	0/0:2.38	0/0:1.48	0/1:1.14	0/1:0.98	0/1:1.36	0/2:2.88	0/0:1.46	1/1:0.12	1/1:0.22	1/1:0.16	0/1:1.34	0/0:2.5	1/1:0.08	0/0:1.96	0/0:2.14	0/1:1.14	0/1:1.28	1/1:0.06	0/1:1.12	0/1:1.28
27	7909001	0.000281718	-0.000803141	FNTA(dist=8730),HOOK3(dist=7838)	intergenic	27:7909001-7916500	CN0	0.82254	0/0:1.92	0/1:0.98	0/0:2.02	0/0:1.74	0/0:2.2	0/0:2.12	0/0:2.06	0/0:1.92	1/1:0.02	0/1:0.98	0/1:1.2	0/0:1.92	0/1:0.96	0/1:0.98	0/0:1.96	0/0:1.98	0/0:2.18	0/0:2.28	0/0:2.16	0/1:1.1	0/0:2.12	0/0:2.02	0/0:2.06	0/0:1.94	0/0:2.04	0/0:2.12	0/0:2.04	0/0:1.98	0/0:1.9	0/0:2.14	0/0:2.04	0/0:2.12	0/0:2.26	0/0:2.02	0/0:1.92	0/0:2.1	0/0:2.04	0/0:2.1	0/0:1.96	0/0:1.9	0/1:1.22
27	8383501	0.0278583	0.0148684	LOC108634066(dist=6664),POLB(dist=2699)	intergenic	27:8383501-8392500	CN2,CNH	0.734241	0/1:2.96	0/0:2.1	0/0:2.44	0/1:3.04	1/1:4.06	0/0:2.04	0/0:1.94	0/1:3.04	0/1:3.04	0/1:3.26	0/1:2.72	0/0:1.98	0/1:3.02	0/0:2.48	0/1:2.94	0/0:2.02	0/0:2.24	0/0:1.94	0/0:2.54	0/1:2.82	1/1:3.72	0/0:1.94	0/1:3.02	0/1:2.82	0/0:2.08	0/1:3.4	0/1:2.86	0/1:3.2	0/1:3.18	1/1:3.86	1/1:3.92	1/1:3.74	1/1:4.1	0/0:1.9	1/1:4.0	1/1:3.8	1/1:3.8	1/1:4.18	0/1:2.9	0/1:3.1	1/1:3.86
27	8393501	-0.00291732	-0.000930019	POLB	exonic	27:8393501-8398000	CN2,CNH	0.656154	1/1:4.42	1/1:4.38	0/1:3.06	0/1:3.14	1/2:5.2	0/0:2.48	0/0:2.26	0/1:3.42	1/2:4.94	0/1:3.56	1/1:4.62	0/1:3.18	0/1:3.14	0/0:2.38	1/1:4.14	0/1:3.24	0/1:2.96	0/1:3.42	1/1:3.74	0/1:3.2	1/1:3.94	0/0:2.16	0/1:3.22	1/1:4.2	1/1:4.36	1/1:3.9	0/1:3.22	0/1:3.54	1/1:4.14	1/1:4.1	1/2:5.12	1/1:4.0	1/1:4.04	1/1:4.36	1/1:4.32	1/1:3.9	1/1:4.12	1/1:4.32	0/1:3.4	0/1:3.22	1/1:4.24
27	26932501	0.0131502	0.0176502	FRG1(dist=542297),LOC102190852(dist=374033)	intergenic	27:26932501-26935500	CN0	0.759523	0/0:1.9	0/0:1.96	0/1:1.46	0/0:2.32	0/0:1.9	0/0:2.26	0/0:2.16	0/0:2.5	0/0:2.08	0/0:1.84	0/0:2.5	0/0:1.92	0/0:2.08	0/1:1.44	0/0:2.06	0/0:2.1	0/0:1.72	0/0:2.44	0/0:1.64	0/0:2.0	0/0:2.04	0/0:1.96	0/0:2.2	0/0:1.98	0/0:1.92	0/0:1.72	0/0:2.28	0/0:2.02	0/0:2.02	0/0:1.58	0/0:2.14	0/0:2.34	0/0:2.02	0/0:2.34	0/0:2.0	0/0:2.06	0/0:2.04	0/0:1.94	0/0:2.02	0/0:1.86	0/0:2.1
27	31864501	-0.00696759	-0.00307811	TENM3	intronic	27:31864501-31868000	CN0	0.800814	0/0:1.82	0/1:0.88	0/0:1.92	0/1:1.08	0/1:0.94	0/1:1.46	0/0:1.78	0/0:1.92	0/0:2.22	0/1:0.9	0/1:1.44	0/0:1.96	0/0:2.24	1/1:0.0	0/1:0.88	0/0:2.06	0/1:0.9	0/0:2.08	0/1:1.06	0/1:1.08	0/1:1.12	0/1:1.06	1/1:0.02	0/0:2.18	0/1:1.16	0/1:1.18	0/0:1.98	0/1:1.12	0/0:2.22	0/0:1.88	0/0:2.32	0/1:1.32	1/1:0.0	1/1:0.0	0/0:2.4	0/1:1.0	1/1:0.0	0/1:1.18	0/1:1.14	0/0:2.04	0/1:1.02
27	32498001	-0.00546574	-0.00422082	LOC102185532(dist=227086),NONE(dist=NONE)	intergenic	27:32498001-32501000	CN2	0.65035	0/0:2.08	0/1:2.72	0/0:2.28	1/1:4.14	0/1:2.76	0/1:2.76	0/0:2.36	1/1:3.74	0/0:2.06	0/1:2.7	0/1:3.34	0/0:1.84	0/0:2.18	0/0:2.26	0/0:2.14	0/0:2.18	0/1:3.14	1/1:3.62	0/0:2.1	0/1:2.84	0/1:2.92	1/1:3.76	0/1:2.7	1/1:3.72	0/1:2.9	0/0:1.84	0/0:2.34	0/1:3.42	0/1:2.96	0/0:1.66	1/1:3.98	1/1:3.52	0/1:2.68	0/1:2.64	0/1:3.08	0/1:2.82	0/1:2.88	0/1:2.92	0/1:3.04	0/1:2.84	0/0:1.74
27	34131501	-0.00454549	-0.00515516	LOC102185532(dist=1860586),TRNAC-GCA(dist=396747)	intergenic	27:34131501-34134500	CN0	0.654363	0/1:0.96	0/1:0.86	0/0:2.0	0/0:1.62	0/0:1.38	0/1:1.18	0/0:2.12	0/0:1.78	0/1:0.8	0/0:1.82	0/1:0.66	0/1:0.94	0/1:1.18	0/1:1.14	0/1:0.82	0/0:1.76	0/1:0.96	0/0:1.74	0/0:2.44	0/0:1.62	0/0:2.46	0/0:2.1	0/1:0.96	0/1:1.14	0/1:1.24	0/0:2.26	0/1:0.64	0/1:0.8	0/1:0.7	0/0:1.44	0/0:1.62	0/1:0.8	0/0:2.26	0/0:2.34	0/0:2.22	0/1:0.98	0/1:1.26	0/0:1.66	0/1:0.7	0/0:2.22	0/1:0.78
27	37045501	-0.0101407	-0.0002408	NEIL3(dist=89160),VEGFC(dist=375926)	intergenic	27:37045501-37051000	CN2,CNH	0.791597	0/0:1.9	0/0:2.14	0/0:1.98	0/0:2.28	0/0:1.92	0/0:2.06	0/0:2.2	0/1:2.98	1/1:3.74	0/0:2.22	0/1:3.08	0/0:2.14	0/0:2.16	0/0:2.04	0/1:2.92	0/0:2.16	0/1:3.04	0/0:2.24	0/0:2.36	0/1:3.24	0/0:2.1	0/1:3.06	0/0:2.02	0/0:1.98	0/0:2.28	0/0:2.0	0/0:2.32	0/1:3.18	0/0:2.14	0/0:1.86	0/0:2.1	0/0:2.24	0/0:1.84	0/0:2.06	0/0:1.94	0/0:1.9	0/0:2.04	0/0:2.22	0/1:3.1	0/0:1.96	0/1:2.5
27	39405501	0.129872	0.0664776	TRNAG-CCC(dist=146044),LOC108634073(dist=58087)	intergenic	27:39405501-39411500	CN0	0.922937	0/0:2.16	1/1:0.14	0/0:2.16	0/1:1.06	1/1:0.08	0/1:1.28	0/1:1.2	0/1:1.3	1/1:0.08	0/0:1.96	1/1:0.18	0/0:2.06	0/1:1.08	1/1:0.0	0/1:1.24	1/1:0.14	0/1:1.24	1/1:0.18	1/1:0.08	1/1:0.22	0/0:1.84	1/1:0.14	1/1:0.2	0/1:0.94	0/0:2.14	0/0:2.18	1/1:0.06	1/1:0.08	1/1:0.1	1/1:0.1	1/1:0.06	1/1:0.06	0/1:1.18	1/1:0.06	1/1:0.12	1/1:0.14	1/1:0.14	1/1:0.18	1/1:0.1	1/1:0.22	1/1:0.14
27	41975501	-0.00358937	-0.00309464	CSMD1	intronic	27:41975501-41979500	CN0,CN2	0.699639	1/1:0.04	0/0:1.96	1/1:0.08	0/1:1.1	0/0:1.72	0/0:1.58	0/1:0.9	1/1:0.0	0/0:1.8	0/0:1.94	0/0:1.72	0/0:1.84	0/1:0.88	0/0:1.64	0/1:0.92	0/0:1.84	1/1:0.04	0/1:1.44	0/1:1.14	0/0:1.62	0/0:1.82	0/0:1.88	0/0:2.1	0/0:1.74	0/1:0.72	0/1:0.8	0/0:1.62	0/0:2.02	0/1:1.04	0/1:0.9	0/1:0.82	0/0:2.02	0/0:1.96	0/1:1.46	0/1:0.8	1/1:0.02	0/1:0.88	0/0:1.74	1/1:0.06	0/0:1.78	1/1:0.02
27	44343501	-0.00788538	-0.0042744	NONE(dist=NONE),TRNAW-CCA(dist=148229)	intergenic	27:44343501-44347500	CN0	0.765283	0/0:1.94	0/0:1.9	0/0:1.88	0/0:2.08	0/0:1.82	0/0:1.98	0/0:2.04	0/1:1.14	0/1:1.06	0/0:2.48	0/0:2.28	0/0:1.98	0/0:1.98	0/0:1.36	0/0:2.12	0/0:1.92	0/0:2.16	0/0:2.18	0/0:1.68	0/0:1.88	0/0:2.22	0/0:1.94	0/0:1.88	0/0:2.04	0/0:2.02	0/0:1.68	0/0:1.94	0/0:1.96	0/0:2.34	0/1:0.9	0/0:2.32	0/0:1.98	0/1:1.0	0/0:2.0	0/0:2.32	0/0:2.06	0/0:2.42	0/0:2.1	0/0:2.24	0/0:2.2	0/0:2.18
28	3246001	0.0022117	0.008135	PTPN20(dist=12305),GDF10(dist=212297)	intergenic	28:3246001-3248000	CN0,CN2	0.749994	0/0:1.96	0/0:2.14	0/1:1.06	1/1:0.24	0/1:0.86	0/1:1.4	0/0:2.08	0/0:1.98	0/0:2.3	0/1:0.94	0/0:2.04	1/1:0.16	0/0:2.2	0/2:3.72	0/1:1.04	0/0:2.26	0/0:1.82	0/1:1.34	0/1:1.4	0/1:1.22	0/1:1.28	0/0:1.86	0/0:1.88	0/1:1.28	0/1:0.98	0/1:1.42	0/1:1.04	1/1:0.28	0/0:2.24	0/1:1.32	1/1:0.08	1/1:0.04	0/0:2.34	1/1:0.06	1/1:0.1	0/1:1.06	0/1:0.92	1/1:0.12	0/1:1.1	1/1:0.04	1/1:0.12
28	5779501	-0.00373271	0.00203237	TRNAG-CCC(dist=54078),LOC106501744(dist=367466)	intergenic	28:5779501-5781500	CN0	0.675772	0/1:1.08	0/0:2.18	0/1:1.08	0/0:2.54	0/0:2.36	0/1:1.3	0/0:2.16	0/1:0.7	0/0:2.28	0/0:1.66	0/1:0.64	0/1:1.02	0/0:1.78	0/0:1.8	1/1:0.02	0/0:1.82	0/1:0.98	0/1:0.88	0/0:1.84	1/1:0.12	0/1:0.92	0/1:1.28	0/0:2.3	0/0:1.86	0/0:2.34	0/0:2.36	0/1:1.32	0/0:2.26	0/1:1.06	0/0:2.3	0/0:1.68	0/0:1.88	1/1:0.08	0/0:1.62	0/0:1.98	0/1:1.44	0/0:1.76	0/0:2.08	0/0:1.88	0/0:1.54	0/1:1.22
28	7502001	-0.00474328	-0.0031264	TRNAC-ACA(dist=159516),NRG3(dist=231782)	intergenic	28:7502001-7506000	CN0	0.822641	1/1:0.26	0/0:1.92	0/0:1.66	1/1:0.32	1/1:0.3	0/0:1.72	1/1:0.24	1/1:0.48	1/1:0.26	1/1:0.24	1/1:0.24	0/0:2.08	0/1:1.26	1/1:0.22	0/1:1.4	1/1:0.32	1/1:0.28	0/0:1.74	1/1:0.42	0/1:1.04	0/1:1.36	1/1:0.24	0/1:1.14	1/1:0.24	1/1:0.44	1/1:0.22	1/1:0.26	1/1:0.24	1/1:0.26	0/1:1.2	0/1:1.2	0/0:1.74	0/0:2.4	0/1:1.14	1/1:0.18	1/1:0.22	1/1:0.16	0/1:1.24	1/1:0.2	1/1:0.18	0/1:1.48
28	7639501	-0.00242213	-0.0031592	TRNAC-ACA(dist=297016),NRG3(dist=95282)	intergenic	28:7639501-7642500	CN0	0.74031	1/1:0.08	0/0:2.1	0/0:2.02	0/1:0.78	0/1:0.82	0/0:1.66	0/0:1.86	0/0:1.78	0/0:1.9	0/0:1.96	0/0:1.68	0/0:1.98	0/0:2.02	0/1:1.34	0/0:1.74	0/0:1.86	0/0:1.8	0/0:2.44	0/1:1.42	0/0:2.0	0/1:0.98	0/0:1.76	0/0:1.94	0/1:1.02	0/0:1.96	0/0:1.74	0/0:2.0	0/1:1.2	0/0:2.12	0/1:1.26	0/1:1.16	0/0:1.94	0/0:2.02	0/0:2.36	0/0:2.04	0/1:1.18	0/0:1.9	0/1:1.32	0/0:2.1	0/1:1.04	0/0:1.88
28	7664001	-0.00560769	-0.00389896	TRNAC-ACA(dist=321516),NRG3(dist=69282)	intergenic	28:7664001-7668500	CN0	0.786528	0/0:2.28	0/0:2.08	0/0:2.16	0/0:2.3	0/0:2.44	0/0:2.46	0/0:2.26	0/0:2.6	0/1:1.22	0/0:2.4	0/0:1.98	0/0:2.16	0/0:2.1	0/0:2.1	0/0:2.46	0/0:2.2	0/1:1.24	0/0:2.36	0/0:2.38	0/1:1.16	0/0:2.3	0/0:1.94	0/0:2.08	0/0:2.0	0/0:2.06	0/0:2.16	0/1:1.24	0/0:2.06	1/1:0.02	0/0:1.96	0/0:2.02	0/0:1.94	0/0:2.24	0/0:2.08	0/0:2.12	0/0:2.08	0/0:1.86	0/0:2.06	0/0:1.8	0/0:2.22	0/0:1.9
28	27315501	0.000205475	0.0162612	RTKN2	intronic	28:27315501-27319000	CN0,CN2	0.65218	0/0:2.04	0/0:2.14	0/1:1.48	0/0:2.22	0/0:2.38	0/0:1.66	0/1:1.16	0/2:2.72	0/0:2.28	0/0:2.32	0/1:1.02	0/0:2.24	0/0:2.28	0/2:2.68	0/0:2.24	0/1:1.22	0/0:2.26	0/0:2.22	0/0:2.12	0/0:2.26	0/0:2.14	1/1:0.04	0/0:1.92	0/1:1.2	0/1:1.34	0/0:2.12	0/0:1.82	0/1:1.42	0/0:2.06	0/0:1.94	0/0:1.9	0/1:0.86	0/0:2.34	0/0:2.26	0/1:1.04	0/0:2.0	0/0:1.88	0/1:1.06	0/0:1.94	0/1:1.06	0/0:1.88
28	29566501	0.119253	0.07039	ANK3	intronic	28:29566501-29570500	CN0	0.795504	0/0:1.78	0/0:2.16	0/1:0.58	0/0:1.78	0/0:1.86	0/1:1.12	0/0:2.04	0/1:0.9	0/0:1.94	0/0:1.88	0/1:0.88	0/0:1.98	0/1:1.06	0/1:1.3	0/0:2.16	0/0:2.0	0/0:2.26	0/0:2.28	0/0:1.6	0/0:1.92	0/0:1.78	0/0:2.22	0/0:1.94	0/0:2.04	1/1:0.0	0/0:2.06	0/0:2.12	0/1:1.06	0/0:2.04	0/0:1.98	0/0:1.9	0/0:2.34	0/0:2.1	0/0:2.24	0/0:2.06	0/0:1.72	0/0:2.06	0/0:1.9	0/1:1.08	0/0:2.22	0/0:1.84
28	32539501	0.00120336	0.0050735	LOC108634143	ncRNA_exonic	28:32539501-32544000	CN0	0.760365	0/0:2.22	1/1:0.12	1/1:0.06	1/1:0.18	0/1:1.18	0/1:1.12	0/1:1.24	0/0:2.38	1/1:0.08	1/1:0.18	0/0:2.3	1/1:0.14	0/1:1.2	0/1:1.36	0/1:1.16	0/1:1.16	0/1:1.46	0/1:1.06	0/1:1.02	0/0:1.76	0/1:1.14	0/0:2.36	0/0:1.92	0/1:1.12	0/1:1.22	0/1:1.32	0/1:0.88	0/1:1.1	0/1:1.16	0/1:0.98	0/1:0.88	0/1:0.84	1/1:0.16	1/1:0.16	0/1:0.74	0/0:2.26	1/1:0.32	0/1:0.84	0/0:2.24	1/1:0.24	0/0:2.04
28	34371001	0.00142394	-0.00497703	LOC102182099(dist=1248200),ZP4(dist=437672)	intergenic	28:34371001-34375000	CN0	0.650717	0/1:1.1	0/1:1.3	0/1:0.8	0/1:0.8	0/1:1.3	0/1:1.36	0/1:1.24	0/1:1.24	0/1:1.18	0/1:1.4	0/1:0.92	0/0:1.64	0/1:1.44	0/1:0.82	0/1:1.46	0/0:1.58	0/1:1.16	0/1:1.0	0/1:1.38	0/0:2.26	0/0:2.0	0/1:1.16	0/0:1.76	0/0:1.58	0/1:0.98	0/1:1.22	0/1:1.16	0/1:1.06	0/0:1.9	0/1:1.02	0/1:1.06	0/0:1.72	0/1:1.14	0/0:1.88	0/1:1.3	0/1:1.32	0/1:1.2	0/1:1.44	0/1:1.14	0/1:1.22	0/1:0.8
28	39687501	0.0200941	0.00406477	LOC108634130(dist=13369),TRNAS-GGA(dist=16182)	intergenic	28:39687501-39695000	CN0,CN2	0.717739	0/0:1.94	0/0:2.0	0/0:1.94	0/0:2.06	0/1:1.42	0/0:1.94	0/0:2.24	0/0:2.42	0/0:1.98	0/0:1.9	0/0:2.16	0/0:2.1	0/1:1.28	0/1:1.24	0/1:1.2	0/1:1.34	0/0:2.04	0/0:2.28	0/0:1.48	0/0:2.24	0/1:1.3	0/1:1.42	0/1:1.46	0/0:1.82	0/0:1.52	0/1:1.28	0/1:1.24	0/0:2.1	0/1:1.34	0/0:1.94	0/1:1.36	0/1:1.2	0/1:0.84	0/0:1.54	0/1:1.22	0/1:1.36	0/1:0.76	0/0:2.1	0/0:2.16	0/1:1.32	0/1:0.7
29	47001	0.0330154	0.08479	NONE(dist=NONE),PANX1(dist=61514)	intergenic	29:47001-57000	CN2	0.652914	0/0:1.88	0/0:1.86	0/0:2.22	0/0:1.94	0/0:2.2	0/0:2.2	0/0:2.16	0/1:2.52	0/0:1.94	0/0:1.9	0/0:1.92	0/0:1.96	0/0:2.12	0/0:2.08	0/0:2.16	0/0:1.68	0/0:2.06	0/0:1.96	0/0:1.82	0/0:2.04	0/0:1.78	0/0:1.72	0/0:1.92	0/0:1.94	0/0:2.02	0/0:2.26	0/0:1.78	0/0:1.9	0/0:1.96	0/0:1.98	0/0:1.96	0/0:2.16	0/0:2.0	0/0:2.24	0/0:2.1	0/0:2.2	0/0:2.1	0/0:2.04	0/0:2.36	0/0:2.02	0/0:2.1
29	687001	-0.00427413	0.00100818	CEP295(dist=46484),LOC102173639(dist=110889)	intergenic	29:687001-693000	CN2,CNH	0.731543	0/0:2.06	0/1:2.82	0/1:2.86	0/0:1.94	0/0:2.18	0/0:2.22	0/0:2.02	1/1:3.74	0/0:2.14	0/0:1.92	0/0:1.82	0/0:1.7	0/0:2.12	0/0:2.1	0/0:2.12	0/0:2.08	0/0:2.08	0/0:1.94	0/0:2.14	0/0:2.04	0/0:1.88	0/0:2.02	0/0:2.12	0/0:1.84	0/0:1.88	0/0:2.06	0/0:1.68	0/0:2.4	0/0:2.24	0/0:1.82	0/0:1.88	0/0:1.64	0/0:1.92	0/0:2.12	0/0:2.04	0/0:1.86	0/0:1.72	0/0:1.8	0/0:1.88	0/0:2.04	0/0:1.92
29	3105501	0.0333062	0.0241792	FAT3(dist=963650),CHORDC1(dist=1479399)	intergenic	29:3105501-3112000	CN0,CN2	0.7102	0/0:1.96	0/1:1.06	0/0:1.82	0/1:0.98	0/0:1.9	0/0:1.8	0/1:0.88	0/1:1.24	0/0:1.94	0/0:2.14	0/0:1.64	0/0:1.8	0/0:1.98	0/0:1.84	0/1:1.16	0/0:1.96	0/1:0.98	0/0:1.98	0/0:1.94	0/0:1.72	0/0:2.26	0/0:2.1	0/0:2.12	0/1:1.1	0/0:2.18	0/0:1.74	0/0:2.0	0/1:0.94	0/0:2.02	0/0:2.0	0/0:2.0	0/0:1.82	0/0:1.92	0/0:2.1	0/0:2.04	0/1:1.14	0/0:1.9	0/0:1.86	0/0:2.02	0/0:1.88	0/1:1.22
29	3262501	-0.005487	-0.00264522	FAT3(dist=1120650),CHORDC1(dist=1325899)	intergenic	29:3262501-3265500	CN0	0.764965	0/1:1.12	0/0:2.06	0/1:1.02	0/0:1.6	0/0:2.0	0/1:1.32	0/0:2.0	0/1:1.34	0/1:1.1	0/1:1.02	0/1:1.38	0/1:1.24	1/1:0.32	0/0:2.04	0/0:2.46	0/1:1.04	0/1:0.96	0/1:1.12	1/1:0.42	0/0:2.12	0/1:1.1	0/0:2.22	0/0:2.02	0/1:0.98	0/1:0.96	0/0:2.2	0/1:1.1	0/0:2.0	1/1:0.5	0/0:1.66	1/1:0.16	0/0:1.78	1/1:0.12	0/1:1.04	1/1:0.1	0/1:1.16	0/0:1.8	0/1:1.1	0/0:1.8	0/1:0.92	0/0:2.18
29	3665001	0.0993286	0.0718288	FAT3(dist=1523150),CHORDC1(dist=921899)	intergenic	29:3665001-3669500	CN0,CN2	0.705638	0/1:1.18	0/1:1.24	0/2:3.16	0/0:2.28	0/1:1.24	0/0:1.56	0/0:2.4	0/2:2.74	0/0:2.18	0/0:2.28	0/1:1.1	0/1:1.16	0/1:1.36	0/0:1.7	0/0:2.32	0/0:2.22	0/1:1.3	0/0:1.5	0/1:1.46	0/0:1.62	0/0:2.3	0/0:2.08	0/1:1.36	0/1:1.22	0/0:2.18	0/1:1.28	0/0:2.38	0/0:2.1	0/0:1.94	0/1:1.12	1/1:0.04	0/0:1.86	1/1:0.0	0/1:0.98	0/0:2.16	1/1:0.0	1/1:0.06	0/1:1.44	1/1:0.04	0/1:0.9	0/0:2.14
29	4978501	0.0104215	0.00809267	LOC102180826(dist=7569),LOC102182032(dist=29227)	intergenic	29:4978501-5003000	CN0	0.940878	1/1:0.04	0/1:1.02	1/1:0.0	1/1:0.0	0/1:1.12	0/1:1.06	1/1:0.04	0/0:2.14	0/0:2.06	0/1:1.14	1/1:0.0	0/1:1.12	1/1:0.02	0/1:1.24	0/1:1.04	0/1:1.04	1/1:0.0	0/0:1.96	1/1:0.0	0/1:1.08	0/1:1.08	0/1:1.18	0/1:1.14	0/0:1.8	0/1:1.06	0/0:2.2	1/1:0.0	0/1:1.08	1/1:0.0	0/1:1.06	1/1:0.0	1/1:0.0	0/0:2.04	0/1:1.0	0/0:2.08	0/1:1.04	0/0:1.96	0/1:1.04	1/1:0.0	0/0:2.06	1/1:0.0
29	5063001	-0.00937937	-0.00196452	LOC102178721	exonic	29:5063001-5124000	CN0,CN2	0.85281	0/0:1.96	0/1:1.04	0/0:1.96	0/0:2.02	0/0:2.0	0/0:1.86	0/0:2.04	0/0:2.12	0/1:1.18	0/0:1.96	0/0:2.12	0/0:2.02	0/0:2.04	0/0:2.2	0/1:1.2	0/0:1.98	0/0:2.08	0/1:1.12	0/0:2.12	0/0:2.06	0/0:1.98	0/1:1.2	0/0:2.0	0/1:1.24	0/1:1.18	0/0:2.04	0/0:1.84	0/0:2.0	0/0:2.06	0/0:1.9	0/0:1.98	0/0:1.84	0/0:1.94	0/1:1.2	0/0:2.08	0/0:1.92	0/2:2.86	0/0:2.06	0/1:1.12	0/0:1.98	0/1:1.22
29	5712001	-0.000519179	0.00160646	NOX4	intronic	29:5712001-5714500	CN0	0.725091	0/1:1.06	0/1:0.98	0/1:0.98	0/1:1.32	0/1:1.08	0/1:0.88	0/1:0.82	0/1:1.12	0/1:0.7	0/1:0.84	0/1:0.72	0/1:0.92	0/1:1.2	0/1:1.26	0/1:1.14	0/0:2.0	0/1:1.16	0/1:0.98	0/1:0.98	0/1:0.96	0/1:0.96	0/1:1.12	0/1:0.94	0/1:1.1	0/1:0.62	0/1:1.24	0/1:1.2	0/1:1.02	0/1:0.84	0/1:0.76	0/1:1.06	0/1:1.2	0/1:0.9	0/0:1.92	0/1:0.96	0/1:0.96	0/1:0.68	0/1:0.78	0/1:0.64	0/1:1.2	0/1:1.06
29	7138001	0.0370493	0.00609989	RAB38(dist=139665),TMEM135(dist=548162)	intergenic	29:7138001-7145000	CN0	0.8237	0/1:1.2	0/0:2.16	0/0:2.18	0/0:2.04	0/0:2.28	0/0:2.14	0/1:1.14	0/1:1.02	0/0:2.3	0/0:2.42	0/0:1.76	0/1:1.02	0/0:2.06	0/1:1.32	0/0:2.3	0/1:1.04	0/1:1.26	0/1:1.24	0/0:2.28	1/1:0.14	0/0:2.12	0/0:1.94	0/0:2.16	0/0:1.78	0/0:1.92	0/0:2.18	0/0:2.22	0/0:2.12	0/0:1.9	0/0:1.96	0/0:1.86	0/0:1.84	0/0:2.26	0/1:0.98	0/0:2.22	0/0:2.04	0/0:2.02	0/0:2.18	0/0:2.22	0/0:1.96	0/0:2.08
29	7354501	0.0631149	0.0437836	RAB38(dist=356165),TMEM135(dist=326162)	intergenic	29:7354501-7367000	CN0	0.773784	0/1:1.26	0/0:1.94	0/1:1.1	0/0:2.02	0/0:1.92	1/1:0.52	0/0:1.94	0/0:1.62	0/0:1.9	0/0:2.14	0/0:1.8	0/0:1.92	0/0:2.02	0/1:1.32	0/0:2.06	0/1:1.28	0/0:1.94	0/1:1.14	0/0:2.06	0/0:1.9	0/1:1.26	0/1:1.38	0/0:1.86	0/0:1.88	0/0:2.0	0/0:2.0	0/1:1.26	0/0:1.98	0/0:2.1	0/0:1.86	0/0:2.06	0/0:1.74	0/0:1.82	0/0:1.92	0/0:2.08	0/0:2.06	0/0:2.06	0/0:1.94	0/0:1.94	0/0:1.94	0/0:2.08
29	10323501	0.000288975	0.0019768	DLG2	intronic	29:10323501-10330500	CN0	0.837208	0/0:2.08	0/0:2.0	0/1:0.84	0/0:1.84	0/0:1.96	0/0:2.02	0/0:1.92	0/0:1.82	0/1:1.0	0/0:1.86	0/0:1.84	0/0:2.0	0/0:1.86	0/0:2.08	0/0:2.04	0/0:1.86	0/0:1.6	0/1:0.98	0/0:1.8	0/0:1.74	0/0:1.82	0/1:1.06	0/0:2.08	0/0:2.02	0/0:1.98	0/0:1.98	0/0:2.12	0/0:1.96	0/0:1.88	0/0:1.86	0/0:1.9	0/0:2.04	0/0:2.04	0/0:1.88	0/0:2.22	0/0:2.08	0/0:1.82	0/0:2.12	0/0:2.04	0/0:2.02	0/0:2.08
29	14263001	0.00399055	0.0188234	LOC102175833(dist=1128876),LOC102176395(dist=165949)	intergenic	29:14263001-14267500	CN0,CN2	0.729213	0/0:2.28	0/0:1.9	1/1:0.0	0/0:1.92	0/1:0.94	0/0:2.02	0/0:2.1	0/0:2.32	0/0:1.96	0/0:2.08	0/0:2.06	0/0:2.04	0/0:2.22	0/0:2.26	0/0:2.28	0/0:2.0	0/0:2.14	0/0:2.38	0/0:2.08	0/0:2.0	0/0:2.1	0/0:2.14	0/0:2.18	0/0:2.16	0/1:1.16	0/0:2.22	0/0:2.06	0/0:2.28	0/0:2.26	0/0:1.84	0/1:1.0	0/1:1.0	0/1:1.14	0/0:2.0	0/0:1.94	0/1:1.06	0/1:1.02	1/1:0.0	0/0:1.86	1/1:0.0	1/1:0.0
29	20589001	0.0149438	0.00452778	TRNAC-GCA(dist=467709),TRNAC-ACA(dist=473080)	intergenic	29:20589001-20598000	CN0	0.900802	1/1:0.02	1/1:0.04	0/1:1.12	0/0:1.84	0/1:1.06	1/1:0.0	1/1:0.04	1/1:0.0	0/1:1.14	1/1:0.0	1/1:0.04	0/1:1.0	1/1:0.06	0/1:1.24	1/1:0.1	0/1:1.12	0/1:1.26	1/1:0.0	1/1:0.08	1/1:0.06	0/1:1.06	1/1:0.06	1/1:0.06	1/1:0.2	0/1:1.34	1/1:0.04	1/1:0.04	0/1:0.96	0/1:1.0	1/1:0.02	1/1:0.02	1/1:0.02	0/1:1.04	1/1:0.02	1/1:0.06	1/1:0.06	1/1:0.0	1/1:0.1	1/1:0.02	1/1:0.02	0/1:1.08
29	20927001	-0.00256628	0.0041044	TRNAC-GCA(dist=805709),TRNAC-ACA(dist=140080)	intergenic	29:20927001-20931000	CN0	0.791768	0/1:1.06	0/0:2.2	0/1:0.84	0/0:2.34	0/0:2.18	0/0:1.96	0/0:2.28	0/1:0.9	0/0:2.36	0/1:1.02	0/1:1.14	0/0:1.92	0/0:1.96	0/0:2.62	0/0:2.18	0/0:1.88	0/0:2.06	0/0:1.82	0/0:1.96	0/0:1.88	0/0:1.96	0/1:1.06	0/0:2.22	0/0:1.9	0/0:2.18	0/0:2.02	0/0:1.84	0/1:0.98	0/0:1.86	0/1:1.06	0/1:1.08	0/1:0.98	0/0:1.9	0/1:0.98	0/1:1.02	0/1:0.84	0/1:1.0	0/1:0.94	0/0:2.04	0/0:2.12	0/0:1.98
29	22323501	0.0149922	0.0281269	ANO5(dist=323705),NELL1(dist=325477)	intergenic	29:22323501-22328500	CN0,CN2	0.667157	0/0:1.68	0/0:1.9	0/0:2.36	0/0:2.06	0/0:2.06	0/0:2.14	0/0:2.1	0/0:1.98	0/1:1.3	0/0:2.08	0/1:1.52	0/0:2.08	0/0:1.96	0/0:2.42	0/0:2.1	0/0:2.12	0/0:2.06	0/1:0.92	0/0:2.02	0/0:1.96	0/0:1.8	0/0:2.12	0/0:2.18	0/1:1.14	0/0:1.74	0/0:1.92	0/0:1.64	0/2:2.66	0/0:1.86	0/0:1.78	0/0:1.88	0/0:1.72	0/0:1.7	0/0:1.76	0/0:1.88	0/0:1.66	0/0:1.9	0/0:1.8	0/0:2.14	0/0:1.96	0/0:1.76
29	26145001	-0.0065703	-0.00490283	LOC108634192(dist=3045),LOC102190107(dist=4275)	intergenic	29:26145001-26149000	CN0,CN2	0.778202	1/1:0.16	1/1:0.06	0/1:1.3	0/1:0.92	1/1:0.22	0/1:1.1	0/1:0.96	0/1:1.14	1/1:0.12	0/0:1.9	0/0:1.54	0/0:1.74	1/1:0.16	0/0:1.52	0/1:1.0	0/0:1.72	1/1:0.16	0/0:1.96	1/1:0.12	0/1:1.0	1/1:0.12	0/1:1.16	0/0:1.96	0/1:1.2	1/1:0.18	0/2:2.54	1/1:0.12	0/1:1.08	0/1:1.2	0/1:0.8	1/1:0.1	0/0:1.88	0/1:1.02	0/1:1.28	1/1:0.1	0/1:1.0	1/1:0.08	0/0:2.06	0/1:1.2	0/1:1.06	0/0:1.78
29	26270501	0.0022894	0.00780664	LOC102172238(dist=17593),LOC102168429(dist=8546)	intergenic	29:26270501-26273500	CN0,CN2	0.698829	0/1:1.1	0/1:1.16	0/0:2.24	0/0:2.1	0/0:2.16	0/2:2.9	0/0:2.24	0/0:1.96	0/1:1.14	0/0:2.18	0/0:2.06	0/0:1.74	0/1:1.1	0/0:2.54	0/0:2.08	0/1:1.24	0/0:2.22	0/0:2.38	0/0:2.4	0/0:2.44	0/1:1.16	0/0:2.08	0/0:2.1	0/0:2.02	0/0:1.9	0/0:1.92	0/0:2.26	0/0:2.18	0/0:2.4	0/1:1.04	0/0:2.0	0/0:2.38	0/0:2.3	0/0:2.0	0/0:1.9	0/0:2.06	0/0:2.1	0/0:2.06	0/0:2.12	0/0:1.94	0/0:2.46
29	26700501	0.0381186	0.0136163	LOC102173719	exonic	29:26700501-26705500	CN0	0.823556	0/0:2.26	0/0:2.14	0/1:1.12	0/1:1.06	0/0:2.04	0/0:2.02	0/0:2.14	0/0:1.72	0/0:1.9	0/1:1.1	0/1:1.12	0/0:1.84	0/0:2.12	0/0:2.14	0/1:1.06	0/1:0.96	0/1:0.82	0/0:1.9	0/0:2.12	0/1:1.2	0/0:2.38	0/1:1.02	0/0:2.22	0/0:2.0	0/0:2.02	0/1:1.08	0/0:2.16	0/0:2.04	0/0:2.04	0/0:2.06	0/0:1.84	0/0:2.14	0/0:1.88	0/0:1.84	0/0:1.98	0/0:2.04	0/0:1.88	0/0:2.0	0/0:1.92	0/0:2.14	0/0:1.96
29	26872501	0.0370419	0.0251566	LOC102177035	exonic	29:26872501-26878500	CN0	0.783076	0/1:0.98	0/0:1.76	0/0:1.96	0/1:1.06	0/0:1.78	0/0:1.62	0/0:1.94	0/0:1.8	0/0:1.82	0/0:2.14	0/0:1.72	0/1:0.92	0/1:1.0	0/0:2.08	0/0:1.72	0/1:0.94	0/0:1.66	0/1:1.14	1/1:0.0	0/0:1.88	0/1:0.94	0/1:0.72	0/0:2.08	0/1:1.0	0/0:1.86	0/0:2.02	0/0:1.74	0/1:1.26	0/1:1.0	0/0:1.7	0/0:1.98	0/0:1.98	0/0:1.94	0/0:1.86	0/0:1.9	0/0:1.68	0/0:2.0	0/0:1.82	0/1:0.84	0/0:1.94	0/0:2.44
29	26892501	-0.00972669	-0.00302861	LOC102176942	exonic	29:26892501-26897000	CN0	0.809111	0/1:1.06	0/0:2.04	0/0:1.82	0/0:2.02	0/1:1.02	0/0:2.14	1/1:0.02	0/0:2.5	0/1:1.04	0/0:2.08	0/1:1.16	0/1:1.02	0/1:1.02	0/0:1.5	0/0:1.76	0/0:2.04	0/1:0.96	0/0:2.22	0/0:2.48	0/0:2.24	0/1:1.06	0/0:2.02	0/0:2.14	0/1:1.2	0/0:2.4	0/0:2.14	0/0:2.18	0/0:2.1	0/1:1.12	0/0:1.76	0/1:1.04	1/1:0.0	0/0:1.86	0/0:2.04	0/0:2.16	0/0:2.3	0/0:2.1	0/0:1.96	0/0:2.04	0/0:1.98	0/0:1.88
29	36793501	0.0212455	0.0210675	LOC102178798,LOC102179918,LOC102180192,LOC102180463,LOC102180731	exonic	29:36793501-36899500	CN2,CNH	0.801164	0/0:2.04	0/0:2.06	0/1:3.1	1/1:3.92	0/1:3.18	1/2:5.2	0/0:2.04	0/0:2.2	0/0:2.04	0/0:2.04	0/1:3.18	0/0:1.98	2/2:6.08	0/1:3.1	0/0:2.12	0/1:3.06	0/0:2.1	1/1:4.04	1/1:4.08	0/1:3.04	1/1:3.88	0/1:3.0	0/1:3.0	1/1:3.86	0/1:3.08	2/2:5.38	0/0:2.04	0/1:3.16	1/1:4.14	0/0:1.92	1/2:4.96	1/1:3.88	1/1:3.9	0/0:1.96	2/2:7.22	1/2:4.96	0/0:1.98	0/0:2.06	0/0:2.08	0/0:2.06	0/1:2.96
29	37122501	0.0241022	0.00980365	LOC102181270	exonic	29:37122501-37151000	CN0,CN2	0.7567	0/0:2.06	0/0:2.02	0/0:2.12	0/0:2.06	0/0:2.0	0/0:2.22	0/0:2.06	0/0:2.16	0/0:2.04	0/0:2.1	0/0:2.02	0/0:2.02	0/0:2.06	0/0:1.88	0/0:2.04	0/0:1.98	0/0:2.1	0/0:2.1	0/0:2.3	0/0:2.1	0/0:2.0	0/0:2.16	0/0:2.0	0/0:2.04	0/0:2.02	0/0:2.12	0/0:2.1	0/0:2.14	0/0:1.94	0/0:1.92	0/0:2.06	0/0:2.08	0/1:1.06	0/0:2.06	0/0:2.14	0/0:2.02	0/1:1.14	0/0:2.16	0/0:2.2	0/0:2.16	0/0:2.04
29	37422001	-0.00853841	-0.00409941	LOC102181567(dist=167893),LOC102177045(dist=102412)	intergenic	29:37422001-37425000	CN0,CN2	0.741768	0/0:2.12	0/0:1.94	0/1:1.04	0/0:1.92	0/1:1.32	0/1:1.18	0/1:1.26	0/0:2.3	0/0:2.12	0/0:2.1	0/1:0.92	1/1:0.04	0/1:1.0	0/0:1.92	0/0:2.38	0/0:1.9	0/1:0.66	0/0:2.5	0/0:2.1	0/1:1.28	0/0:1.76	0/1:0.98	1/1:0.02	0/0:2.02	0/0:1.92	0/0:2.38	0/1:1.52	1/1:0.0	0/1:1.1	0/0:1.76	0/1:0.9	1/1:0.0	0/0:2.08	0/1:0.98	0/1:1.36	0/0:1.94	0/1:1.14	0/0:2.08	1/1:0.0	0/0:2.12	0/0:1.62
29	37431501	0.0120814	0.00834299	LOC102181567(dist=177393),LOC102177045(dist=93412)	intergenic	29:37431501-37434000	CN2	0.658757	0/0:1.96	0/0:2.08	0/1:2.62	0/0:2.0	0/0:2.2	0/0:2.3	0/0:2.08	0/0:2.14	0/0:2.14	0/0:1.88	0/1:2.5	0/0:1.96	0/0:2.22	0/0:1.6	1/1:3.96	0/0:1.9	0/1:3.16	0/0:1.92	0/0:1.96	0/0:1.78	0/0:1.94	0/0:2.04	0/0:2.04	0/0:1.98	0/0:2.0	0/0:2.22	0/0:2.38	0/0:2.12	0/0:2.12	0/0:1.88	0/1:2.58	0/0:2.18	0/0:2.42	0/0:1.78	0/0:1.92	0/0:2.18	0/0:2.34	0/0:2.0	0/1:2.56	0/0:2.02	0/0:1.88
29	37762001	-0.00422521	-0.0012434	LOC102170120(dist=50006),LOC108634229(dist=75453)	intergenic	29:37762001-37821500	CN0	0.978273	1/1:0.02	1/1:0.02	0/1:1.14	1/1:0.0	1/1:0.02	0/1:0.98	0/1:1.02	0/1:0.98	1/1:0.0	0/1:1.04	1/1:0.0	1/1:0.02	1/1:0.02	1/1:0.0	1/1:0.02	0/1:1.0	1/1:0.0	0/1:1.06	1/1:0.0	0/1:1.06	0/1:1.04	1/1:0.02	1/1:0.02	1/1:0.16	1/1:0.0	0/1:1.08	0/1:1.02	1/1:0.0	0/1:1.1	1/1:0.0	1/1:0.0	0/0:2.22	0/1:1.06	0/1:1.04	1/1:0.0	1/1:0.0	0/1:1.06	1/1:0.0	1/1:0.0	1/1:0.0	0/1:0.98
29	37828501	-0.00422521	-8.26898e-06	LOC102170120(dist=116506),LOC108634229(dist=56953)	intergenic	29:37828501-37840000	CN0	0.951121	1/1:0.02	1/1:0.02	0/1:1.14	1/1:0.06	1/1:0.02	0/1:1.26	0/1:1.06	0/1:1.06	1/1:0.0	0/1:1.16	1/1:0.0	1/1:0.02	1/1:0.02	1/1:0.0	1/1:0.02	0/1:1.12	1/1:0.0	0/1:1.28	1/1:0.0	0/1:1.14	0/1:1.12	1/1:0.02	1/1:0.02	1/1:0.18	1/1:0.04	0/1:1.14	0/1:1.12	1/1:0.0	0/1:1.18	1/1:0.0	1/1:0.0	0/0:2.26	0/1:1.04	0/1:0.98	1/1:0.0	1/1:0.0	0/1:1.16	1/1:0.02	1/1:0.0	1/1:0.0	0/1:1.0
29	37970501	-0.00891006	-0.0035923	LOC102178059	exonic	29:37970501-37974000	CN2	0.696831	0/0:2.12	0/0:2.1	0/1:2.72	0/0:2.0	0/0:2.1	0/1:3.44	0/1:2.82	0/1:2.8	0/0:2.06	0/0:2.58	0/0:1.98	0/0:1.9	0/0:1.94	0/0:2.18	0/0:1.94	0/1:3.0	0/0:2.1	0/1:2.92	0/0:2.02	0/1:2.88	0/1:2.68	0/0:2.12	0/0:1.92	0/0:2.14	0/0:2.1	0/1:3.26	0/1:3.06	0/0:1.9	0/0:2.6	0/0:2.08	0/0:2.16	1/1:4.08	0/1:2.74	0/1:2.88	0/0:2.1	0/0:2.46	0/1:2.8	0/0:1.72	0/0:1.88	0/0:2.28	0/1:2.9
29	37983501	0.00557545	0.00616665	LOC102178059(dist=4300),LOC102178345(dist=52453)	intergenic	29:37983501-38019500	CN0	0.735701	1/1:0.08	0/1:1.0	0/1:1.02	0/1:0.54	0/1:0.58	0/1:1.14	0/0:1.58	0/1:1.08	0/1:1.02	0/1:1.08	1/1:0.08	1/1:0.08	1/1:0.08	0/1:0.6	0/1:1.12	0/1:1.08	0/1:0.58	0/1:1.16	1/1:0.06	0/0:1.58	0/0:1.52	1/1:0.08	0/1:0.54	0/1:0.6	1/1:0.06	0/0:1.78	0/1:1.06	1/1:0.04	0/1:1.02	1/1:0.08	1/1:0.06	0/0:2.04	0/1:1.1	0/1:1.0	1/1:0.06	1/1:0.06	0/1:1.08	1/1:0.06	1/1:0.06	0/1:0.58	0/1:1.04
29	38175501	0.00553086	-0.00287671	LOC102178345(dist=95191),LOC102179463(dist=156197)	intergenic	29:38175501-38178500	CN0,CN2	0.684743	0/1:1.14	0/1:1.14	0/1:1.32	0/1:1.44	0/0:2.42	0/0:2.4	0/1:1.28	0/1:1.16	0/0:2.38	1/1:0.1	1/1:0.04	0/0:2.12	1/1:0.16	0/1:1.66	0/2:2.78	0/1:1.26	0/0:2.14	0/1:1.1	1/1:0.32	0/1:1.42	0/1:0.92	0/1:1.36	0/0:2.14	0/0:2.0	0/1:1.5	0/1:1.28	0/1:0.9	0/0:2.14	0/1:1.12	0/1:0.82	0/0:1.92	0/0:2.02	0/0:2.06	0/0:1.86	0/0:2.3	0/0:2.3	0/0:1.96	0/2:2.58	0/0:2.08	0/0:2.28	0/0:1.96
29	39504501	0.113649	0.0948816	PAG-11(dist=114755),LOC102171498(dist=19466)	intergenic	29:39504501-39542500	CN0	0.910056	0/0:2.2	0/0:2.02	0/0:2.1	0/0:2.2	0/0:2.08	0/0:1.86	0/0:2.14	0/0:2.22	0/0:2.02	0/0:2.0	0/0:2.04	0/0:2.02	0/0:2.02	0/0:2.06	0/0:2.18	0/0:2.12	0/0:2.04	0/0:1.96	0/0:1.92	0/0:2.04	0/0:2.0	0/0:2.08	0/0:2.08	0/0:2.1	0/0:2.24	0/0:2.0	0/0:2.04	0/0:2.18	0/0:2.14	0/1:0.9	0/1:1.0	0/1:1.0	0/1:0.98	0/1:1.04	0/1:1.0	0/1:0.98	0/1:1.04	0/1:1.04	0/1:1.04	0/1:1.02	0/1:1.04
29	39544001	0.113649	0.101012	LOC102171498	exonic	29:39544001-39565000	CN0	0.891462	0/0:2.02	0/0:2.04	0/0:2.22	0/0:2.06	0/0:2.1	0/0:2.16	0/0:2.04	0/0:2.34	0/0:1.96	0/0:2.12	0/0:2.14	0/0:2.0	0/0:2.04	0/0:1.98	0/0:2.24	0/0:2.02	0/0:2.22	0/0:2.18	0/0:2.16	0/0:2.2	0/0:2.06	0/0:2.06	0/0:2.0	0/0:2.04	0/0:2.3	0/0:2.12	0/0:1.92	0/0:2.26	0/0:1.86	0/1:0.94	0/1:0.96	0/1:0.94	0/1:1.06	0/1:1.02	0/1:1.0	0/1:1.0	0/1:0.94	0/1:1.06	0/1:0.98	0/1:1.06	0/1:0.78
29	39565501	0.0721421	0.117941	APOOL,LOC102171498	exonic	29:39565501-39725000	CN2	0.748162	0/1:3.02	0/1:2.96	0/1:2.94	0/1:3.1	0/1:3.18	0/1:3.0	0/1:3.12	0/1:3.18	0/1:2.98	0/1:3.16	0/1:3.14	0/1:3.0	0/1:2.98	1/1:3.56	0/1:3.26	0/1:2.86	0/1:2.96	0/1:2.96	0/1:2.96	0/1:2.96	0/1:2.98	0/1:3.06	0/1:3.06	0/1:3.02	0/1:3.1	0/1:2.98	0/1:2.92	0/1:3.04	0/1:3.04	0/0:1.98	0/0:2.04	0/0:1.96	0/0:2.0	0/0:2.02	0/0:2.04	0/0:1.98	0/0:1.96	0/0:2.1	0/0:2.12	0/0:2.06	0/0:1.92
29	42119001	0.0757675	0.034371	LOC102175469	exonic	29:42119001-42134000	CN2,CNH	0.800471	1/1:4.08	1/1:4.02	1/1:4.32	0/1:3.3	1/1:4.46	0/1:3.04	1/1:4.08	1/1:4.46	0/0:2.14	1/1:4.28	1/1:4.38	0/0:2.1	1/1:4.22	0/1:3.2	1/1:4.34	0/1:3.08	0/1:3.12	1/1:4.26	0/1:3.16	1/1:4.42	1/1:4.3	1/1:4.22	0/0:2.16	0/1:3.02	0/1:3.22	0/1:2.98	1/1:3.94	0/1:3.08	1/1:4.02	1/1:4.02	1/1:3.86	1/1:3.84	0/1:3.1	0/1:3.02	1/1:4.28	1/1:4.0	1/1:3.98	1/1:4.12	0/0:2.1	1/1:4.0	1/1:3.88
29	42541001	0.0306648	0.00951356	C29H11orf95(dist=32408),C29H11orf84(dist=8851)	intergenic	29:42541001-42544500	CN0	0.808038	1/1:0.06	0/0:1.98	0/0:2.26	0/1:1.12	0/0:2.32	0/0:2.16	0/1:0.98	0/1:1.18	0/1:1.2	0/0:2.02	0/1:1.1	1/1:0.2	0/1:0.94	0/1:1.12	0/0:2.02	0/1:1.22	1/1:0.0	0/1:1.56	0/1:1.0	1/1:0.1	1/1:0.1	0/0:2.26	0/1:1.28	0/1:1.18	1/1:0.1	0/1:1.28	0/1:1.2	1/1:0.02	0/1:1.46	1/1:0.16	0/0:2.0	0/0:1.78	0/0:2.1	0/0:2.16	0/0:2.26	0/0:1.9	0/0:2.08	0/0:2.42	0/0:2.06	0/0:2.18	0/0:1.88
29	49290501	0.0217277	0.0133348	SHANK2(dist=117951),DHCR7(dist=20324)	intergenic	29:49290501-49296500	CN0	0.787657	0/0:2.08	0/0:1.98	0/0:2.0	0/0:1.96	0/0:2.34	0/0:1.86	0/0:2.02	0/0:2.34	0/0:2.06	0/0:2.0	0/0:2.14	0/0:1.96	0/0:2.08	0/0:2.08	0/0:2.18	0/0:2.14	0/0:1.98	0/0:1.98	0/0:1.74	0/0:2.28	0/0:1.7	0/0:2.0	0/0:1.98	0/0:1.92	0/0:2.2	0/0:1.86	0/0:1.94	0/0:2.2	0/0:1.82	0/0:1.98	0/0:2.06	0/1:1.48	0/1:0.96	0/1:1.0	0/1:1.02	0/1:0.92	0/1:1.04	0/1:1.24	0/0:2.1	0/1:1.14	0/0:2.02
29	49464001	0.0651792	0.0152732	MRGPRG(dist=14968),OSBPL5(dist=13588)	intergenic	29:49464001-49472000	CN2,CNH	0.802274	0/0:2.12	0/0:2.16	0/1:2.96	0/0:1.9	0/0:2.1	0/0:1.98	0/0:2.14	0/0:1.88	0/0:2.08	0/0:2.18	2/2:6.66	0/0:2.04	0/0:2.14	0/0:2.12	0/0:2.1	0/0:1.96	0/0:2.16	0/1:2.92	0/0:1.9	0/0:2.08	0/1:3.22	0/0:2.06	0/0:2.08	2/2:6.34	0/0:2.06	0/0:2.06	0/0:2.3	0/0:2.16	0/0:1.94	0/0:2.18	0/0:1.94	0/0:2.12	0/0:2.22	0/0:2.12	0/0:2.08	0/0:2.1	0/0:1.96	0/0:2.34	0/0:2.26	0/0:2.0	0/0:1.9
29	50832501	-0.00386449	-1.21451e-06	IFITM10(dist=83520),LOC106503767(dist=24288)	intergenic	29:50832501-50843500	CN0,CN2	0.705352	0/0:2.1	0/0:1.98	0/0:2.0	0/0:1.84	0/0:1.94	0/0:2.08	0/0:2.08	0/0:2.24	0/0:2.02	0/0:1.8	0/0:2.14	0/0:2.02	0/0:2.1	0/0:2.14	0/0:2.18	0/0:2.02	0/0:2.2	0/0:2.02	0/0:2.16	0/2:2.56	0/0:2.04	0/2:2.66	0/0:2.0	0/0:2.0	0/0:2.06	0/0:2.04	0/0:2.0	0/0:2.08	0/2:2.86	0/0:2.0	0/0:2.1	0/0:2.2	0/0:2.22	0/0:1.98	0/0:2.06	0/0:2.04	0/0:1.92	0/0:2.2	2/2:4.04	0/0:2.0	2/2:3.56
3	1559501	0.200484	0.0659659	LOC102185912(dist=5290),LOC102186202(dist=5902)	intergenic	3:1559501-1564500	CN0,CN2,CNH	0.701589	0/0:2.08	0/0:2.14	2/2:4.22	2/2:3.84	2/2:4.2	0/0:2.14	0/0:2.14	0/0:2.08	0/0:2.38	0/2:3.26	0/0:1.68	2/2:3.72	0/0:1.96	0/0:2.1	0/0:2.52	0/0:2.24	0/0:2.14	0/0:2.2	0/1:1.12	2/2:4.16	2/2:3.74	3/3:5.92	0/0:2.18	0/1:1.44	2/2:4.1	0/2:3.22	2/2:4.54	2/2:4.06	0/0:2.08	0/0:2.02	0/0:1.8	0/0:1.64	0/0:2.36	0/0:1.88	0/0:1.86	0/0:1.96	0/0:1.72	0/0:2.56	0/0:2.32	0/0:2.1	0/0:1.94
3	2910501	0.141784	0.0683952	LOC102179832(dist=233773),ASB1(dist=71485)	intergenic	3:2910501-2913500	CN0	0.780146	0/0:1.76	0/1:1.24	0/0:1.98	0/0:1.78	0/0:2.46	0/0:2.06	0/0:1.86	0/1:1.42	0/1:1.26	0/0:1.94	0/0:1.84	0/0:1.96	0/0:1.94	0/1:1.42	0/0:2.52	0/0:2.16	0/0:1.64	0/1:1.34	0/0:2.36	0/1:1.18	0/0:2.04	0/1:1.18	0/0:1.9	0/0:2.08	0/0:1.92	0/0:2.18	0/0:2.16	0/0:1.98	0/0:2.44	0/0:2.16	0/0:1.92	0/0:1.98	0/0:2.42	0/0:2.04	0/0:1.96	0/0:1.78	0/0:2.18	0/0:1.74	0/1:1.24	0/0:1.94	0/0:2.1
3	7633501	-0.0110944	-0.0033601	DGKD	intronic	3:7633501-7645000	CN2,CNH	0.740809	0/0:2.14	0/0:2.14	0/0:2.12	0/0:2.22	0/0:2.0	0/0:2.16	0/1:3.08	0/0:2.06	0/0:2.12	0/0:1.96	0/0:2.12	0/0:2.1	0/0:2.04	0/1:2.78	0/0:2.16	0/0:1.96	0/0:2.14	0/0:2.34	0/0:2.26	0/0:2.3	0/0:1.86	0/0:2.12	0/0:2.24	0/1:3.0	0/0:2.14	0/0:2.42	0/0:2.18	0/0:1.9	0/0:2.2	0/0:2.44	0/0:1.98	0/0:2.36	0/0:2.28	0/0:2.22	0/0:1.8	0/0:2.04	0/0:1.94	0/0:2.12	0/0:2.22	0/0:2.02	0/0:2.12
3	9377001	0.0723145	0.038956	C3H1orf94(dist=114538),GJB5(dist=508966)	intergenic	3:9377001-9380000	CN0	0.757899	1/1:0.02	0/0:1.9	0/1:1.18	1/1:0.0	0/0:1.64	0/1:0.9	0/0:2.16	0/1:1.18	0/0:1.88	0/1:0.98	0/0:2.02	0/1:1.12	1/1:0.0	0/0:1.8	1/1:0.04	0/0:2.02	0/1:1.32	1/1:0.08	0/1:1.08	0/1:1.14	0/1:1.0	0/0:2.08	0/0:2.02	0/0:2.1	1/1:0.0	0/0:2.2	0/1:0.82	0/0:2.22	0/1:1.16	0/1:1.04	0/1:1.24	0/0:2.14	0/0:2.0	0/0:1.86	0/0:2.36	0/0:2.48	0/1:1.26	0/0:1.96	0/0:1.66	0/0:2.56	0/1:1.06
3	13858501	0.013143	0.0600543	NDUFS5(dist=25289),LOC102169353(dist=15999)	intergenic	3:13858501-13862000	CN0	0.714766	0/1:1.16	0/1:1.24	0/1:0.9	0/1:1.38	0/1:1.14	0/0:1.9	0/1:1.08	0/1:0.96	0/1:1.0	0/0:1.72	0/1:1.08	0/0:1.98	0/0:2.28	0/1:1.38	0/0:2.18	0/1:1.18	0/1:1.3	0/0:1.66	0/1:1.2	0/1:1.12	0/0:1.66	0/1:1.46	0/0:1.72	0/1:1.32	0/1:0.86	0/0:1.74	0/1:1.2	0/0:1.96	0/0:2.04	0/1:1.2	0/1:0.64	0/1:0.84	0/1:1.06	0/1:0.92	0/1:1.22	0/1:0.96	0/1:1.0	0/1:1.02	0/1:0.9	0/1:0.84	0/1:1.02
3	14332501	0.075532	0.0222519	PABPC4(dist=18519),HEYL(dist=15375)	intergenic	3:14332501-14336000	CN0,CN2	0.672264	0/1:1.02	0/0:2.1	0/2:2.66	0/1:1.06	0/1:1.16	0/0:1.94	0/0:2.12	0/1:0.94	0/0:2.36	0/1:1.42	0/0:1.92	0/0:2.16	0/0:2.02	0/1:1.08	0/0:2.34	0/0:1.94	0/1:0.96	0/1:0.88	0/0:2.08	0/0:2.0	0/1:0.98	0/0:2.14	0/0:2.24	0/0:2.12	1/1:0.0	0/0:1.64	0/1:1.28	0/0:2.32	0/2:2.64	0/0:2.34	0/0:1.92	0/0:2.0	0/0:2.24	0/0:2.08	0/0:2.04	0/0:2.02	0/0:2.0	0/0:2.28	0/0:2.14	0/0:2.2	0/0:2.38
3	29391001	0.0275168	0.013341	DHCR24(dist=19160),TMEM61(dist=8643)	intergenic	3:29391001-29411000	CN0,CN2	0.711646	0/1:1.28	0/1:1.32	0/0:2.3	0/0:2.0	0/0:2.42	0/0:2.22	0/0:2.3	0/0:2.44	0/0:2.2	0/1:1.12	0/0:2.2	0/0:2.26	0/0:2.38	0/0:1.86	0/0:2.4	0/0:2.3	0/0:2.2	0/0:2.24	0/0:2.24	0/0:2.34	0/0:2.16	0/0:2.34	0/1:1.24	0/0:2.32	0/0:2.22	0/0:2.16	0/0:2.2	0/0:2.22	0/0:2.16	1/1:0.2	0/0:2.14	0/0:2.02	0/0:2.24	0/0:2.14	0/0:2.3	0/0:2.34	0/0:2.12	0/0:2.36	0/0:2.3	0/0:2.18	0/0:2.16
3	34739001	0.00294254	0.00869073	LOC102191099	intronic	3:34739001-34741000	CN0,CN2	0.814195	1/1:0.0	0/1:0.96	0/1:1.04	1/1:0.0	1/1:0.02	1/1:0.0	1/1:0.0	0/1:0.98	1/1:0.0	0/1:1.0	1/1:0.0	1/1:0.02	1/1:0.0	0/1:1.0	0/1:0.94	0/1:0.96	0/1:0.06	0/1:0.92	0/1:1.0	0/1:1.14	0/1:1.02	1/1:0.02	1/1:0.0	0/1:0.12	0/1:1.28	1/1:0.0	0/1:0.94	1/1:0.0	1/1:0.0	0/1:0.92	0/1:0.7	0/1:1.08	0/1:0.76	0/1:1.28	1/1:0.0	1/1:0.0	1/1:0.0	1/1:0.0	0/0:1.98	1/1:0.0	0/1:1.64
3	37399001	0.0172318	0.0414756	LOC102188010(dist=78572),KANK4(dist=182897)	intergenic	3:37399001-37410500	CN0,CN2	0.674025	0/0:2.2	0/0:2.16	0/0:1.8	0/0:1.98	0/0:2.44	0/0:2.08	0/0:2.16	0/0:2.46	0/0:2.28	0/0:2.22	0/0:1.94	0/0:2.16	0/0:2.26	0/0:1.98	0/0:2.5	0/0:2.24	0/0:2.16	0/0:2.14	0/0:2.16	0/2:2.54	0/0:2.04	0/0:2.22	0/0:2.14	0/0:2.02	0/2:2.62	0/0:2.38	0/0:2.2	0/0:2.06	0/0:2.24	0/0:1.98	0/1:0.92	0/1:0.94	0/0:2.18	0/0:1.78	0/0:2.06	0/0:2.0	0/0:1.82	0/0:2.2	0/0:1.98	0/0:1.98	0/1:0.98
3	44071001	0.00452182	0.0206188	RPE65(dist=13154),TRNAK-UUU(dist=18674)	intergenic	3:44071001-44076500	CN0,CN2	0.759578	0/0:2.24	0/0:2.16	0/2:2.76	0/1:1.02	0/0:2.16	0/0:1.96	0/0:2.06	0/0:2.34	0/0:2.04	0/1:1.28	0/0:2.26	0/0:2.2	0/0:1.96	0/0:1.96	0/0:2.16	0/0:2.18	0/0:2.4	0/0:2.38	0/0:2.08	0/0:2.1	0/1:1.14	0/0:2.06	0/0:2.22	0/1:1.2	0/0:2.18	0/0:2.18	0/0:2.0	0/0:1.96	0/0:2.18	0/0:1.94	0/1:1.18	0/0:1.92	0/0:2.08	0/0:1.94	0/0:2.1	0/0:1.9	0/0:2.1	0/0:2.02	0/0:1.98	0/0:2.16	0/0:2.32
3	44470501	-0.00557699	0.0159726	TRNAC-GCA(dist=190922),LRRC7(dist=1004288)	intergenic	3:44470501-44476000	CN2,CNH	0.702103	0/0:2.3	0/0:2.12	0/0:2.28	0/0:2.42	0/0:2.02	0/0:1.96	0/0:2.14	0/1:2.66	0/0:2.36	0/0:2.32	0/0:2.44	0/0:2.1	0/0:2.28	0/1:3.06	0/0:2.16	0/0:2.08	0/0:2.22	0/0:2.22	0/0:2.3	0/0:2.48	0/0:2.14	2/2:5.82	0/0:2.42	0/0:2.06	0/0:2.4	0/0:2.46	0/0:2.24	0/0:2.3	0/0:2.5	0/0:2.14	0/0:2.02	0/0:1.72	0/0:1.76	0/0:2.1	0/0:2.36	0/0:2.1	0/0:1.98	0/0:2.2	0/0:2.3	0/0:1.8	0/0:1.74
3	44707501	0.0139797	-0.00236608	TRNAC-GCA(dist=427922),LRRC7(dist=768788)	intergenic	3:44707501-44711500	CN0	0.793755	0/1:0.96	0/0:2.04	0/0:2.26	0/1:1.22	0/0:2.02	0/0:2.14	0/1:1.1	0/1:0.98	0/0:2.22	0/1:0.96	1/1:0.0	0/1:1.08	0/1:0.96	0/0:2.4	0/0:2.14	0/0:2.06	1/1:0.04	0/0:2.44	0/0:1.98	0/0:2.02	1/1:0.02	0/0:2.12	0/0:2.24	1/1:0.32	0/0:2.4	0/0:2.26	0/0:2.28	0/0:1.78	0/1:1.08	0/0:1.98	0/0:2.1	0/0:1.96	0/0:2.1	0/0:1.88	0/0:2.26	0/0:2.0	0/0:2.04	0/0:2.16	0/1:1.0	0/0:1.86	0/0:2.54
3	48924501	-0.0137694	-0.00342726	NEGR1(dist=862099),LRRIQ3(dist=1155492)	intergenic	3:48924501-48930500	CN2,CNH	0.742753	0/0:2.16	0/0:2.02	0/0:1.96	0/0:1.98	0/0:1.94	0/0:2.18	0/0:2.08	0/0:2.1	0/0:2.04	0/0:2.0	0/1:3.0	0/0:2.16	0/0:1.92	0/0:2.08	0/0:2.38	0/0:2.08	0/0:2.38	0/0:2.12	0/0:2.04	0/0:2.14	0/0:2.12	0/0:2.28	0/0:2.08	0/0:2.14	0/0:2.1	0/0:2.46	0/0:1.96	0/0:2.04	0/0:2.16	0/0:1.86	0/0:2.0	0/0:1.82	0/1:2.84	0/0:2.1	0/0:1.8	0/0:1.92	0/0:1.9	0/0:2.18	0/0:1.98	0/0:1.96	0/0:2.3
3	50230501	0.0346786	0.0193413	LRRIQ3	intronic	3:50230501-50236000	CN0	0.892687	0/1:1.12	1/1:0.0	1/1:0.0	0/1:1.22	0/1:1.1	1/1:0.64	0/0:2.1	0/1:1.28	1/1:0.0	1/1:0.0	0/1:1.18	0/1:1.1	0/0:2.08	0/0:1.82	0/1:0.96	1/1:0.02	0/1:1.02	0/1:1.04	1/1:0.0	0/1:0.9	0/1:1.04	0/1:1.1	0/1:1.12	0/0:1.74	0/1:1.16	0/1:0.96	0/1:0.86	0/1:1.3	0/0:2.1	1/1:0.02	1/1:0.0	1/1:0.0	1/1:0.0	0/1:1.06	1/1:0.0	1/1:0.0	1/1:0.0	1/1:0.0	1/1:0.0	1/1:0.0	1/1:0.0
3	51652501	-0.0109268	0.000689706	LOC102179380	exonic	3:51652501-51899500	CN2,CNH	0.833624	0/1:3.22	0/0:2.22	0/0:2.34	0/0:2.32	0/0:2.36	0/0:2.46	0/0:2.3	0/0:2.46	0/0:2.24	0/0:2.3	0/0:2.34	0/0:2.3	0/1:2.66	0/0:2.48	0/0:2.34	0/0:2.3	0/0:2.4	0/0:2.36	0/1:3.22	0/0:2.36	0/0:2.32	0/0:2.3	0/1:3.22	0/0:2.24	0/0:2.4	0/0:2.36	0/0:2.4	0/1:3.2	0/0:2.36	0/0:2.18	0/0:2.18	0/0:2.14	0/0:2.16	0/0:2.2	0/0:2.24	0/0:2.22	0/0:2.2	0/0:2.26	0/0:2.18	0/0:2.28	0/1:3.34
3	51923001	0.0800001	0.0500099	LOC108635392(dist=24015),LOC102190925(dist=119840)	intergenic	3:51923001-51926500	CN0,CN2	0.6832	0/2:3.28	0/0:2.08	0/0:2.16	0/0:1.82	0/0:2.38	0/2:2.86	0/0:2.12	0/0:2.52	0/0:2.48	0/0:1.7	0/0:2.18	0/0:2.02	0/1:1.14	0/0:2.04	0/2:2.62	0/0:2.06	0/0:2.16	0/2:2.62	0/2:3.38	0/0:2.44	0/0:2.4	0/0:2.32	0/2:3.38	0/0:2.16	0/0:2.34	0/0:2.4	0/2:2.72	0/2:3.26	0/0:2.06	0/0:2.02	0/0:1.88	0/0:1.86	0/0:2.06	0/0:2.48	0/0:2.28	0/0:1.94	0/0:2.1	0/0:2.2	0/0:1.82	0/0:2.16	0/0:2.38
3	56816501	0.0683225	0.0356065	TRNAW-CCA(dist=109076),LOC102173355(dist=1028599)	intergenic	3:56816501-56821000	CN2	0.738006	0/0:2.02	0/0:1.94	1/1:3.68	0/1:3.06	0/1:3.14	0/0:2.04	0/1:3.2	1/1:3.44	0/0:2.22	0/0:1.9	1/1:3.58	0/0:1.84	0/0:2.24	0/0:2.24	0/0:2.12	0/0:2.28	0/0:2.08	0/0:2.16	0/1:3.12	0/1:2.86	0/0:2.18	0/0:2.28	0/0:2.04	0/0:1.96	0/1:3.38	1/1:4.2	0/0:1.54	0/0:1.98	1/1:3.76	0/0:1.78	0/0:2.04	0/0:1.92	0/0:1.84	0/0:2.16	0/0:2.1	0/0:2.3	0/0:2.16	0/0:2.14	0/0:1.84	0/0:1.84	0/0:1.68
3	66548501	0.00167911	0.00234879	LOC102186299	upstream	3:66548501-66561500	CN0	0.928981	0/1:1.16	0/0:2.14	1/1:0.0	1/1:0.0	1/1:0.04	1/1:0.0	1/1:0.04	1/1:0.06	0/0:2.1	1/1:0.0	0/0:2.06	0/0:2.12	0/1:1.14	0/1:1.04	0/1:1.24	0/0:2.06	0/1:1.06	0/1:1.1	0/1:1.16	0/1:1.18	0/1:1.0	0/1:1.14	1/1:0.06	0/1:1.3	0/1:1.24	1/1:0.1	0/1:1.02	1/1:0.0	0/1:1.16	0/1:1.06	1/1:0.0	0/0:1.98	1/1:0.0	0/1:1.16	0/0:2.26	0/0:2.0	0/0:2.04	0/0:2.28	1/1:0.02	0/0:1.94	0/1:1.12
3	72232501	-0.00746496	-0.00414676	LOC102182748(dist=24493),RWDD3(dist=17708)	intergenic	3:72232501-72238000	CN0	0.82893	0/1:1.08	0/1:1.08	0/1:0.94	0/1:1.02	0/1:1.18	1/1:0.08	0/1:1.06	1/1:0.12	0/0:2.24	0/1:1.18	1/1:0.18	0/0:2.3	1/1:0.14	0/1:1.2	1/1:0.22	0/0:2.02	0/1:0.94	0/0:1.82	0/1:1.1	0/1:1.28	0/1:0.98	0/0:2.22	0/0:2.14	0/1:1.26	0/1:1.34	0/1:1.26	0/1:0.92	0/0:2.4	1/1:0.1	0/1:1.22	0/0:2.1	0/1:1.12	0/0:2.44	0/1:1.0	0/0:1.88	0/0:1.92	0/0:1.78	0/0:2.0	0/0:1.88	0/0:1.96	0/0:2.04
3	76102501	-0.00394591	0.00358865	SNX7(dist=59947),PLPPR5(dist=46717)	intergenic	3:76102501-76105500	CN2,CNH	0.679482	0/0:2.22	0/0:2.02	0/0:2.04	0/0:1.88	0/0:2.42	0/0:1.88	0/0:2.04	0/0:2.16	0/0:2.18	0/0:2.18	0/0:1.9	0/0:2.18	0/0:2.12	0/1:2.7	0/1:3.14	0/0:1.92	0/0:1.8	0/0:1.9	0/0:1.94	0/0:2.6	0/0:2.14	0/0:2.36	0/0:2.12	0/0:2.06	0/0:2.32	0/1:3.06	0/0:1.96	0/0:2.08	0/0:1.94	0/0:2.2	0/0:2.06	0/0:2.1	0/1:2.84	0/0:2.2	0/0:2.3	0/0:2.26	0/0:1.78	0/0:2.62	0/0:1.9	0/0:2.18	0/0:2.22
3	79177001	0.017569	-0.0014734	OLFM3	intronic	3:79177001-79180000	CN0,CN2	0.658212	0/1:1.06	0/0:2.08	0/0:2.0	0/0:1.94	0/0:1.9	0/0:1.48	0/0:1.9	0/0:1.48	0/0:2.16	0/0:1.66	0/0:1.88	0/1:1.16	0/1:1.22	0/1:1.1	0/0:2.0	0/0:2.0	0/1:1.04	0/0:1.94	0/0:1.96	0/0:1.88	0/0:2.34	0/1:0.9	0/0:2.04	0/0:2.06	0/0:1.86	0/0:2.12	0/0:1.76	0/0:2.16	0/0:2.04	0/1:1.06	0/1:1.06	0/0:2.16	0/0:2.0	0/0:2.46	0/0:1.7	0/0:2.14	0/0:2.2	0/0:1.94	0/0:2.2	0/0:2.32	0/0:2.0
3	80531001	0.0595805	0.0262021	LOC102170571(dist=303855),RNPC3(dist=122449)	intergenic	3:80531001-80534500	CN0,CN2	0.70394	0/0:2.16	0/0:1.9	0/0:2.34	0/0:1.8	0/0:1.84	0/0:1.7	0/0:1.94	0/0:2.32	0/0:2.04	0/0:2.1	0/0:1.58	0/0:2.32	0/0:2.14	0/0:2.42	0/0:2.34	0/0:1.94	0/0:1.92	0/0:2.26	0/0:2.06	0/0:2.08	0/0:2.16	0/0:1.98	0/0:1.74	0/0:1.9	0/0:1.72	0/0:2.06	0/0:1.68	0/0:2.22	0/0:1.6	0/0:1.72	0/1:1.1	0/0:1.86	0/0:1.6	0/1:1.02	0/1:1.12	0/0:2.12	0/0:2.0	0/0:1.58	0/0:1.84	0/1:0.84	0/1:1.36
3	80784001	-0.00731157	-0.00187962	LOC102169350	exonic	3:80784001-80851000	CN0	0.918335	0/0:1.94	0/0:1.88	0/0:2.0	0/0:1.96	0/0:1.88	0/0:1.88	0/0:1.94	0/0:1.9	0/0:1.94	0/0:1.94	0/0:1.92	0/1:0.98	0/1:1.0	0/0:1.94	0/0:1.92	0/0:1.92	0/0:1.9	0/0:1.9	0/0:1.88	0/1:0.96	0/0:1.96	0/1:1.02	0/0:2.0	0/0:1.92	0/0:1.88	0/0:1.9	0/0:1.96	0/0:1.98	0/1:0.96	0/0:1.76	0/0:2.02	0/0:1.98	0/0:1.9	0/0:2.0	0/0:1.94	0/0:2.02	0/0:2.04	0/0:1.86	0/0:1.96	0/0:2.0	0/0:2.16
3	81038001	-0.00545973	-0.00298199	LOC102169350(dist=242816),LOC102190753(dist=1527461)	intergenic	3:81038001-81047000	CN0	0.672244	0/1:1.6	0/0:2.1	0/1:1.1	0/1:1.48	0/1:1.34	0/1:1.48	0/1:0.52	0/0:1.86	0/0:2.14	0/0:2.06	0/0:1.9	0/0:2.22	0/0:2.14	0/1:1.56	0/0:2.06	0/0:2.08	0/1:1.2	0/0:1.76	0/1:0.74	0/0:2.08	0/1:1.36	0/0:1.98	0/0:2.26	0/1:1.32	0/1:0.8	0/1:1.48	0/1:1.4	0/1:1.26	0/1:1.24	0/1:0.66	0/1:1.52	0/1:1.12	0/0:1.98	0/0:1.84	0/1:1.5	0/0:1.86	0/0:1.9	0/1:1.5	0/1:1.44	0/0:2.06	0/0:1.92
3	83125501	0.0542903	0.0202604	LOC102190753(dist=549826),PRMT6(dist=1119318)	intergenic	3:83125501-83128500	CN0	0.776038	0/0:1.88	0/0:2.02	0/0:2.14	0/0:2.22	0/0:1.74	0/0:2.28	0/0:1.86	0/0:2.2	0/0:1.96	0/0:2.1	0/0:1.72	0/0:2.08	0/0:1.68	0/1:0.52	0/0:1.66	0/0:1.88	0/0:1.62	0/1:0.58	0/0:2.04	0/0:2.2	0/0:2.4	0/0:2.1	0/0:2.12	0/0:1.9	0/0:1.74	0/0:2.04	0/0:2.14	0/0:2.18	0/0:1.6	0/1:1.04	0/1:0.8	0/0:1.84	0/0:1.8	0/0:1.84	0/0:2.18	0/0:2.04	0/0:1.82	0/0:2.34	0/0:1.78	0/1:0.74	0/1:0.98
3	86827501	-0.00114688	0.000595174	LOC102189813,LOC106503993,LOC108633298	exonic	3:86827501-86866500	CN2	0.737756	0/1:2.84	0/0:2.32	0/1:2.98	0/1:2.52	0/1:3.18	0/1:2.98	0/1:2.94	0/1:3.0	0/1:2.86	0/1:2.96	0/1:3.0	0/1:2.8	0/1:2.8	0/1:3.12	0/1:2.94	0/1:2.98	0/1:3.04	0/1:2.88	0/1:2.58	0/1:2.9	0/1:2.46	0/1:2.88	0/1:2.84	0/1:2.84	0/1:3.04	0/1:2.44	0/1:3.04	0/1:3.0	0/1:3.02	0/1:3.22	0/1:2.94	0/1:3.12	0/1:3.0	0/1:3.04	0/1:2.74	0/1:2.96	0/1:2.96	0/1:2.9	0/1:2.94	0/1:3.0	0/1:3.08
3	90942001	-0.00879853	-0.0023714	LOC108635585(dist=2170),LOC108635586(dist=12668)	intergenic	3:90942001-90957000	CN0	0.891076	1/1:0.38	1/1:0.32	1/1:0.24	0/1:1.36	1/1:0.3	0/1:1.34	0/1:1.14	0/0:2.3	0/1:1.28	0/0:2.1	0/1:1.32	1/1:0.26	0/1:1.18	0/1:1.24	0/0:2.2	1/1:0.32	1/1:0.26	1/1:0.3	1/1:0.3	0/1:1.36	0/0:2.08	0/1:1.14	0/0:1.94	0/0:1.76	0/1:1.32	0/1:1.34	0/1:1.32	0/0:1.94	0/0:2.16	0/1:1.2	0/0:2.08	0/0:2.08	0/0:2.26	0/0:2.08	0/0:2.12	0/0:1.98	0/0:2.06	0/0:2.16	0/0:2.06	0/0:1.98	0/0:1.96
3	92441001	-0.00122201	0.00310513	TSPAN2(dist=110568),NGF(dist=93346)	intergenic	3:92441001-92444500	CN0	0.668276	0/1:0.92	0/1:1.0	0/0:1.88	0/0:1.94	0/1:0.98	0/1:0.78	0/0:1.58	0/0:2.02	0/1:0.76	0/1:1.36	0/0:1.94	0/1:0.74	0/0:1.56	0/0:1.7	0/1:0.88	0/1:0.74	0/1:0.9	0/1:1.44	0/0:1.72	0/1:0.88	0/0:2.22	0/1:0.82	0/1:1.06	0/1:1.24	0/1:0.72	0/0:1.96	0/1:1.44	0/0:2.46	0/1:0.92	0/1:0.94	0/1:0.64	0/1:0.76	0/1:0.64	0/1:0.66	0/1:0.74	0/1:0.62	0/1:0.62	0/1:0.64	0/1:0.74	0/1:0.8	0/1:0.62
3	95861501	0.258367	0.105966	SPAG17(dist=306150),TBX15(dist=433835)	intergenic	3:95861501-95866000	CN0,CN2	0.656034	0/1:1.0	0/0:2.18	0/0:2.24	0/0:2.12	0/1:1.24	0/0:1.96	0/0:2.14	0/1:1.08	0/0:2.16	0/1:0.84	0/0:2.26	0/0:2.16	0/0:2.16	0/1:1.34	0/0:2.44	0/1:1.02	0/0:1.98	0/0:1.86	0/1:1.54	0/1:1.06	0/0:2.08	0/1:1.08	0/1:1.2	0/1:1.04	0/0:2.12	0/0:2.14	0/1:1.16	0/0:1.9	0/1:0.94	0/0:2.0	0/0:1.94	0/0:1.66	0/0:1.94	0/0:2.0	0/0:2.16	0/0:1.94	0/0:1.78	0/0:2.22	0/1:1.14	0/0:2.04	0/0:2.24
3	99381001	-0.00728314	-0.00137944	LOC102171395,LOC102171676,LOC102171944,LOC102172226,LOC102172676,LOC102172954,LOC102173247,LOC102173518,LOC102180554,LOC106501929,LOC108633254	exonic	3:99381001-99449000	CN2,CNH	0.692537	0/0:2.24	0/0:2.22	0/0:2.34	0/0:2.3	0/0:2.26	0/0:2.26	0/0:2.2	0/0:2.18	0/0:2.18	0/0:2.38	0/0:2.32	0/0:2.28	0/0:2.12	0/1:2.48	0/0:2.24	0/0:2.2	0/0:2.36	0/0:2.34	0/0:2.34	0/0:2.42	0/0:2.28	0/0:2.3	0/0:2.22	0/0:2.16	0/0:2.38	0/0:2.36	0/0:2.28	0/0:2.26	0/0:2.34	0/1:3.22	0/0:2.36	0/0:2.36	0/0:2.26	0/0:2.2	0/0:1.92	0/0:2.22	0/0:2.32	0/0:2.24	0/0:2.02	0/0:2.2	0/0:2.16
3	100257001	-0.0060784	-0.00347769	ARNT	intronic	3:100257001-100260500	CN0	0.73129	0/0:2.32	1/1:0.12	0/0:2.54	0/0:2.34	0/0:2.14	0/0:1.78	0/1:1.2	0/0:1.5	0/1:1.24	0/0:2.32	0/0:2.58	0/1:1.26	0/1:1.12	0/0:1.6	0/0:2.28	1/1:0.16	0/1:0.94	0/1:1.1	0/0:2.52	0/0:2.2	0/0:2.46	0/1:1.14	0/0:2.16	0/1:0.94	0/0:2.22	0/0:2.0	0/0:1.56	0/0:1.96	0/0:1.9	0/0:2.48	0/0:2.4	0/0:2.44	0/0:2.26	0/0:1.86	0/0:2.14	0/0:2.24	0/0:1.88	0/0:2.36	0/0:2.42	0/0:2.16	0/0:2.42
3	101701501	-0.00289406	-0.0033674	TRNAN-AUU,TRNAV-CAC	downstream	3:101701501-101709000	CN2,CNH	0.667427	0/0:2.44	0/1:3.1	0/1:2.96	0/0:2.3	0/0:2.4	0/0:2.4	0/0:2.46	0/0:2.36	0/1:3.14	0/0:2.34	0/1:2.74	0/1:3.28	0/0:2.2	1/1:3.86	0/0:2.32	0/0:2.24	0/0:2.26	1/2:4.58	0/1:2.76	0/1:3.16	0/0:2.32	0/0:2.42	0/0:2.52	0/0:2.4	0/1:3.48	0/0:2.42	0/1:3.16	0/0:2.34	0/1:3.4	0/1:3.2	1/1:3.82	1/1:4.0	1/1:3.96	1/1:3.94	1/1:3.96	0/1:3.2	1/1:4.06	0/0:2.48	1/2:4.64	0/1:3.38	0/0:2.32
3	102844501	0.0772167	0.0318188	LOC102183026(dist=23135),LELP1(dist=74192)	intergenic	3:102844501-102848000	CN0	0.672394	1/1:0.48	0/1:0.56	1/1:0.3	1/1:0.48	1/1:0.16	1/1:0.14	0/1:0.82	0/1:1.2	1/1:0.1	0/1:0.82	1/1:0.32	1/1:0.3	1/1:0.2	0/1:0.94	0/1:0.96	1/1:0.24	0/1:0.6	0/1:0.82	1/1:0.2	0/1:0.8	0/1:0.98	1/1:0.3	1/1:0.46	1/1:0.26	1/1:0.26	1/1:0.46	0/1:0.9	1/1:0.12	0/1:1.14	1/1:0.48	1/1:0.12	1/1:0.18	1/1:0.2	1/1:0.12	1/1:0.06	1/1:0.06	1/1:0.1	1/1:0.12	1/1:0.3	1/1:0.08	1/1:0.18
3	102884501	0.0774401	0.0376869	LOC102183026(dist=63135),LELP1(dist=15192)	intergenic	3:102884501-102907000	CN0	0.90936	0/0:2.0	0/0:2.08	0/1:1.06	0/1:1.02	1/1:0.0	0/1:1.1	0/0:2.0	0/0:2.08	0/0:2.12	0/0:2.1	0/0:2.08	0/0:1.94	0/1:1.04	0/0:1.88	0/0:2.06	0/0:1.98	0/0:1.98	0/0:2.0	0/1:1.04	0/0:1.94	0/0:1.94	0/1:0.98	0/0:1.86	0/1:1.12	0/0:2.1	0/1:1.0	0/0:2.0	0/1:1.1	0/0:2.02	0/0:1.88	0/0:2.06	0/0:2.1	0/0:2.14	0/1:1.04	0/0:2.02	0/0:2.06	0/0:2.0	0/0:2.02	0/0:2.18	0/0:2.1	0/0:2.0
3	106723501	0.0208717	0.0104005	LOC108635661	exonic	3:106723501-106844000	CN2,CNH	0.894499	0/1:2.96	0/1:2.92	0/0:1.98	0/1:2.9	1/1:4.36	0/1:2.96	0/1:2.98	0/1:3.12	0/0:2.06	0/0:2.0	0/0:2.06	0/1:2.9	0/1:3.0	1/1:3.88	0/0:2.18	0/0:1.96	1/1:3.94	0/0:2.0	0/0:1.96	0/1:2.98	0/0:1.96	0/1:2.96	0/0:2.02	0/0:2.02	0/0:2.1	0/1:3.0	0/0:1.98	0/1:2.92	0/0:1.96	0/0:1.92	0/1:2.9	1/1:3.82	0/0:1.98	0/1:2.98	0/0:2.04	0/0:1.96	0/0:2.0	0/0:2.0	0/1:3.08	0/0:2.06	0/0:2.02
3	108619001	-0.00290653	0.0131031	LOC102189080(dist=46673),LOC102174789(dist=7955)	intergenic	3:108619001-108624000	CN0	0.797078	0/0:2.2	0/1:0.88	0/0:2.34	0/1:0.96	0/0:2.2	0/0:2.02	0/0:2.26	0/0:2.6	0/0:2.16	0/0:2.16	0/0:1.9	0/0:2.1	0/1:1.2	0/0:1.86	0/0:2.02	0/0:2.06	0/0:2.16	0/0:2.22	0/0:2.3	0/0:2.22	0/0:2.0	0/0:2.04	0/0:2.18	1/1:0.3	0/0:2.12	0/0:2.04	0/0:2.48	0/0:2.04	0/0:2.22	0/1:1.08	0/0:1.8	0/0:2.12	0/1:0.86	0/0:2.06	0/1:1.02	0/1:0.9	0/0:1.68	0/0:2.4	0/0:2.04	0/0:1.92	0/1:1.24
3	111403501	0.0541288	0.0357626	LOC108635631	upstream	3:111403501-111420500	CN0,CN2	0.785328	0/0:2.24	0/0:2.2	0/0:2.28	0/2:3.1	0/0:2.5	0/0:2.26	0/2:3.22	2/2:3.44	0/0:2.28	0/0:2.1	0/2:3.26	0/2:3.04	0/2:2.98	0/1:1.32	0/0:2.38	0/0:2.16	0/0:1.96	0/2:2.92	0/0:2.44	0/2:3.18	0/0:2.12	0/0:2.18	0/2:3.04	0/2:2.9	0/0:2.32	0/2:3.22	0/2:3.1	0/2:3.2	0/2:3.26	0/0:2.08	0/0:1.98	0/0:1.86	0/0:2.08	0/0:1.92	0/0:2.2	0/0:1.92	0/0:1.82	0/0:2.28	0/0:2.22	0/0:2.08	0/2:3.18
3	111431501	0.0581414	0.0254864	LOC108635631(dist=5384),LOC102180092(dist=13052)	intergenic	3:111431501-111440000	CN2	0.652003	0/0:2.38	0/0:2.26	0/1:2.52	0/0:2.26	0/1:2.66	0/1:2.52	0/0:2.12	0/1:2.54	0/0:2.18	0/0:2.4	0/0:2.42	0/0:2.08	0/0:2.08	0/1:3.24	0/0:2.24	0/0:2.02	0/1:2.52	0/1:2.5	0/0:2.34	0/1:2.58	0/0:2.14	0/0:2.3	0/0:2.08	0/0:1.98	0/0:2.42	0/0:2.28	0/0:2.28	0/0:2.02	0/1:2.52	0/0:2.1	0/0:1.94	0/0:1.98	0/0:2.16	0/0:2.02	0/0:2.1	0/0:2.06	0/0:2.18	0/0:2.26	0/0:2.08	0/0:2.34	0/0:1.6
3	111570001	-0.000273092	0.00639549	LOC102179092	exonic	3:111570001-111574000	CN0,CN2	0.701072	0/1:1.26	0/1:1.2	0/1:1.42	0/0:1.9	0/0:2.06	0/1:1.22	0/0:2.28	0/1:1.5	0/0:1.76	0/1:1.1	0/1:1.64	0/0:1.96	0/1:1.28	0/1:0.78	0/1:1.38	0/0:1.96	1/1:0.38	0/0:2.18	1/1:0.44	0/0:2.44	0/1:1.2	0/1:1.12	0/0:2.0	0/1:1.28	1/1:0.4	0/2:2.54	0/0:1.94	0/0:2.22	0/2:2.62	0/1:1.68	0/0:2.16	0/0:2.2	0/1:1.24	0/0:1.9	0/0:2.28	0/0:1.96	0/0:2.12	0/0:1.84	0/0:2.26	0/0:1.96	0/0:2.32
3	115125501	0.0246237	0.00828209	LOC102176837(dist=544750),LOC108635606(dist=405753)	intergenic	3:115125501-115133000	CN0,CN2	0.742716	0/0:2.18	0/0:1.92	0/0:1.86	0/0:1.96	0/0:2.08	0/0:2.02	0/0:2.16	0/0:2.06	0/0:2.06	0/0:1.94	0/0:2.42	0/0:1.94	0/0:1.96	0/0:2.4	0/0:2.26	0/0:1.96	0/0:1.9	0/0:1.98	0/0:2.12	0/0:2.04	0/0:2.28	0/0:1.98	0/0:2.08	0/0:2.06	0/0:2.16	0/0:2.2	0/0:2.12	0/0:2.08	0/0:2.16	0/0:2.12	0/0:1.86	0/0:1.9	0/0:1.98	0/0:2.24	0/0:2.02	0/0:1.84	0/0:1.84	0/0:2.24	0/0:2.18	0/0:2.04	0/0:1.98
3	117840001	0.0248582	0.008658	LOC102174448	exonic	3:117840001-117845500	CN0	0.821297	1/1:0.0	0/0:1.94	0/1:0.98	0/0:2.2	1/1:0.02	0/0:1.82	0/0:2.02	1/1:0.0	0/0:2.18	1/1:0.0	0/1:0.94	0/1:1.1	1/1:0.02	0/1:1.06	1/1:0.02	0/1:1.0	0/1:1.28	1/1:0.04	0/1:1.06	0/0:2.18	0/1:1.08	0/1:0.98	0/0:1.86	0/1:0.98	0/0:1.78	1/1:0.0	0/0:1.9	0/1:1.06	0/1:1.02	0/0:1.7	0/1:1.06	0/1:0.98	0/0:1.94	0/1:0.96	1/1:0.0	0/0:2.08	0/0:1.9	0/1:0.98	0/0:1.84	0/0:1.9	0/0:1.92
4	4684001	0.00282158	-0.00245716	TRNAW-CCA(dist=101836),ACTR3B(dist=2802)	intergenic	4:4684001-4688000	CN0	0.793161	0/1:1.12	0/0:2.18	0/0:2.24	0/0:2.2	1/1:0.0	0/0:1.76	0/0:2.04	0/0:2.0	0/0:1.96	1/1:0.06	1/1:0.06	0/1:1.22	0/1:1.12	1/1:0.0	0/0:2.0	0/1:0.94	0/0:2.32	0/1:0.96	0/0:2.26	0/1:1.24	0/1:1.02	0/1:0.96	0/1:1.0	0/0:1.94	0/0:1.86	0/0:2.0	0/0:2.08	0/0:2.28	1/1:0.0	0/0:2.06	0/0:1.82	0/0:2.1	0/0:1.94	0/0:2.38	0/0:2.4	0/0:1.9	0/0:1.68	0/0:1.94	1/1:0.0	0/0:2.1	0/0:1.94
4	6216501	-0.00168356	0.00114054	FASTK,LOC102181771,LOC108635825,SLC4A2	exonic	4:6216501-6264000	CN2,CNH	0.889252	0/0:2.14	0/1:3.06	0/0:2.04	0/1:3.22	0/1:3.24	0/0:2.08	0/0:2.18	0/0:2.08	0/0:2.14	0/0:2.08	0/0:2.24	0/0:2.16	0/0:2.14	0/0:2.0	0/0:2.26	0/0:2.08	0/0:2.02	0/0:2.24	0/0:2.12	0/0:2.12	0/1:3.16	0/0:2.18	0/0:2.14	0/1:3.06	0/0:2.14	0/0:2.04	0/1:2.94	0/0:2.08	0/0:1.92	2/2:6.26	0/1:2.98	0/0:2.0	0/1:2.9	0/0:2.02	0/0:2.02	0/0:2.0	0/1:2.9	0/0:2.04	0/0:2.04	0/0:1.98	0/0:1.98
4	6412001	0.00312986	0.0190253	KCNH2(dist=25893),AOC1(dist=32467)	intergenic	4:6412001-6417500	CN2,CNH	0.732219	0/1:2.98	0/1:3.06	0/0:2.16	0/0:2.46	0/1:3.22	0/0:2.32	0/0:2.24	0/0:2.12	0/0:2.12	0/0:2.54	1/1:4.2	0/0:2.12	0/0:2.0	0/1:3.32	0/0:2.04	0/0:2.12	0/0:2.0	0/0:1.96	0/0:1.94	0/0:2.32	0/0:1.94	0/0:2.12	0/1:2.86	0/0:2.04	0/0:2.54	0/0:2.2	0/0:2.44	0/0:2.36	0/0:2.14	0/0:2.12	0/0:2.04	0/0:1.8	0/0:2.1	0/0:2.34	0/0:2.3	0/0:2.1	0/0:1.98	0/0:2.26	0/0:2.0	0/0:1.82	0/0:1.74
4	6549001	0.00281997	0.00635633	TMEM176B(dist=32882),LOC102177217(dist=23448)	intergenic	4:6549001-6569500	CN0,CN2,CNH	0.792943	0/0:2.2	0/2:3.06	0/1:1.22	0/0:2.16	0/2:3.36	0/2:3.24	0/1:1.16	0/0:2.18	2/2:4.12	0/2:3.42	0/0:2.38	0/1:1.18	0/1:1.14	0/1:1.3	0/0:2.28	0/0:2.06	1/1:0.06	0/0:2.1	2/2:3.94	0/0:2.12	0/2:3.04	0/2:3.28	0/0:2.32	0/2:2.82	0/2:3.2	0/1:1.08	0/0:2.18	0/0:2.16	0/1:1.2	3/3:5.5	0/0:1.9	0/0:2.04	0/0:1.98	0/1:1.18	0/0:2.14	0/0:2.04	0/0:1.9	0/0:2.16	0/1:1.16	0/0:2.0	0/2:3.06
4	7427501	0.0359206	0.00682315	LOC102178162(dist=1763),LOC102179185(dist=41498)	intergenic	4:7427501-7431000	CN2	0.678421	0/1:2.74	0/0:1.94	0/0:2.0	0/0:2.18	0/0:2.12	0/1:2.82	0/0:2.06	0/0:2.4	0/0:1.84	0/0:2.28	0/0:2.5	0/0:1.74	0/0:1.98	0/0:2.3	0/0:2.08	0/0:2.1	0/0:2.44	0/0:2.18	0/0:2.26	0/0:2.2	0/0:1.94	0/0:2.12	0/0:1.96	0/0:1.94	0/0:2.44	0/0:2.26	0/0:2.32	0/0:2.34	0/0:2.12	0/1:2.9	1/1:3.66	0/0:2.26	0/0:1.8	0/0:2.58	1/1:3.64	0/1:3.48	0/0:2.42	1/1:3.72	0/1:2.94	0/0:2.4	0/1:2.9
4	10264001	0.00311483	0.0166203	CNTNAP2	intronic	4:10264001-10267000	CN0	0.751827	0/0:1.76	0/0:1.98	0/0:2.3	0/0:1.9	0/0:2.16	0/0:2.1	0/0:2.3	0/1:1.28	0/0:2.08	0/0:2.0	0/0:2.26	0/0:2.24	0/0:2.34	0/0:2.0	0/0:2.36	0/0:1.92	0/0:2.26	0/0:2.24	0/0:1.54	0/0:1.98	0/0:1.74	0/0:2.08	0/0:2.24	0/0:2.06	0/1:1.36	0/0:2.16	0/1:1.26	0/0:1.92	0/0:1.88	0/0:1.86	0/0:2.2	0/0:1.92	0/0:2.18	0/0:1.84	0/0:2.26	0/0:2.02	0/0:1.68	0/0:1.96	0/0:2.04	0/0:1.78	0/0:1.94
4	12271001	-0.00905575	0.00146755	CNTNAP2(dist=973245),TRNAS-GGA(dist=12262)	intergenic	4:12271001-12276000	CN0	0.780252	0/0:1.96	0/0:2.06	0/0:2.14	0/1:1.04	0/0:2.26	0/0:2.02	1/1:0.14	0/1:1.54	0/0:2.06	0/0:2.42	0/0:1.7	0/0:2.22	0/1:0.9	0/1:0.98	0/0:2.48	1/1:0.06	0/0:2.56	0/1:1.4	0/0:2.56	0/1:1.4	0/0:1.96	0/1:1.18	0/0:1.88	0/0:1.68	0/0:2.02	0/1:1.38	0/1:1.22	0/0:2.08	0/1:0.92	0/1:0.92	0/1:0.9	0/1:0.9	0/0:1.98	0/1:0.84	0/0:2.04	0/1:1.02	0/0:1.86	1/1:0.08	0/0:1.78	0/0:1.82	0/0:1.7
4	13134501	0.0625654	0.0453109	LOC102188286,LOC102188468	exonic	4:13134501-13176500	CN0	0.905841	0/0:2.08	0/0:1.96	0/0:1.8	0/0:2.14	0/0:2.02	0/0:2.16	0/0:2.06	0/0:1.96	0/0:1.98	0/1:1.04	0/0:2.22	0/0:2.02	0/0:2.02	0/0:2.12	0/0:2.14	0/0:1.96	0/0:2.02	0/0:2.12	0/0:2.06	0/0:2.16	0/0:2.14	0/0:2.1	0/0:2.06	0/0:2.04	0/0:2.18	0/0:2.08	0/0:2.24	0/0:1.98	0/0:2.04	0/0:1.88	0/0:1.98	0/0:2.18	0/0:1.9	0/0:2.08	0/1:1.06	0/0:2.02	0/1:0.96	0/0:2.04	0/0:2.06	0/0:2.04	0/0:2.2
4	14199001	-0.00749701	-0.00440298	LOC102181470,LOC108635908	exonic	4:14199001-14221000	CN0	0.940829	1/1:0.02	0/1:1.08	0/0:2.18	0/1:1.04	0/1:1.18	0/0:2.1	1/1:0.02	0/1:1.28	0/1:1.06	0/0:2.1	1/1:0.0	0/1:1.1	1/1:0.02	1/1:0.0	1/1:0.02	1/1:0.02	0/0:2.12	0/1:1.0	0/0:2.06	0/1:1.26	0/1:1.08	1/1:0.02	1/1:0.02	0/1:0.94	1/1:0.0	0/1:1.1	1/1:0.0	0/1:1.08	1/1:0.0	0/0:1.98	1/1:0.0	0/1:0.96	0/1:1.02	1/1:0.0	0/0:2.08	0/0:1.96	0/0:1.88	0/0:2.04	0/0:2.0	0/0:2.08	0/1:1.08
4	14227001	-0.00809215	-0.00410319	LOC102181470(dist=5408),LOC108635909(dist=6012)	intergenic	4:14227001-14229500	CN0,CN2	0.702868	1/1:0.16	0/1:1.32	0/0:1.82	0/1:1.24	0/1:1.06	0/2:2.68	1/1:0.28	0/1:1.22	0/1:1.18	0/0:2.12	1/1:0.4	0/1:1.08	1/1:0.2	1/1:0.24	1/1:0.28	1/1:0.12	0/2:2.54	0/1:1.16	0/0:2.36	0/1:1.28	0/1:1.36	1/1:0.2	1/1:0.26	0/1:0.98	1/1:0.1	0/1:1.26	1/1:0.34	0/0:1.58	1/1:0.2	0/0:2.38	1/1:0.16	0/1:1.26	0/1:0.7	1/1:0.1	0/2:2.5	0/2:2.42	0/0:1.74	0/2:2.6	0/2:2.52	0/2:2.42	0/0:1.66
4	14231501	-0.00362158	-0.00412457	LOC102181470(dist=9908),LOC108635909(dist=1512)	intergenic	4:14231501-14234000	CN0,CN2	0.767554	1/1:0.2	0/1:1.16	0/2:2.7	0/1:1.1	0/1:0.98	0/2:2.66	1/1:0.16	0/1:0.96	0/1:1.4	0/0:2.06	1/1:0.14	0/1:1.22	1/1:0.12	1/1:0.14	1/1:0.22	1/1:0.04	0/0:2.38	0/1:0.94	0/2:3.04	0/1:1.52	0/1:1.14	1/1:0.06	1/1:0.24	0/1:0.92	1/1:0.24	0/0:1.72	1/1:0.04	0/1:1.22	1/1:0.08	0/0:2.12	1/1:0.08	0/1:1.06	0/1:1.12	1/1:0.22	0/0:2.24	0/0:2.1	0/0:2.14	0/0:2.22	0/0:2.38	0/2:2.5	0/1:1.3
4	21074501	0.061411	0.0380215	CNOT4	intronic	4:21074501-21084000	CN2,CNH	0.800828	0/0:2.0	1/1:3.94	0/0:2.5	0/0:2.14	0/0:2.28	0/0:2.34	0/1:3.04	0/0:2.08	0/0:2.16	0/0:2.16	1/1:4.02	0/1:2.94	0/0:2.18	0/0:2.16	0/0:2.1	0/1:2.82	0/0:2.04	1/2:4.6	1/2:5.0	0/0:2.38	0/0:2.16	0/0:2.1	0/1:3.2	0/0:2.32	0/0:1.84	0/0:2.48	0/0:1.9	0/0:1.94	0/0:2.2	0/0:2.44	0/0:2.16	0/0:2.1	0/0:2.12	0/0:2.04	0/0:2.24	0/0:2.06	0/0:2.16	0/0:2.22	0/0:1.9	0/0:2.08	0/0:2.36
4	22638001	0.0225797	0.0413929	EXOC4	intronic	4:22638001-22642000	CN0	0.77683	0/0:2.06	0/0:2.26	0/0:1.88	0/0:2.24	0/0:2.3	0/0:2.26	0/0:2.12	0/0:2.32	0/0:2.1	0/0:2.16	0/0:1.88	0/0:2.16	0/0:2.24	0/0:2.28	0/0:2.02	0/0:2.16	0/0:2.4	0/0:2.06	0/0:2.58	0/0:2.42	0/0:2.08	0/0:2.12	0/0:2.26	0/0:2.04	0/0:2.16	0/0:2.4	0/0:2.66	0/0:2.1	0/0:2.3	0/1:1.2	0/1:1.06	0/0:2.06	0/0:2.1	0/0:1.98	0/0:2.06	0/0:1.94	0/0:2.06	0/0:2.0	0/1:1.06	0/0:1.98	0/0:2.14
4	23345001	0.0383177	0.0259284	LOC108635911(dist=19955),CHCHD3(dist=64537)	intergenic	4:23345001-23350500	CN0	0.811696	0/0:2.16	0/1:1.16	0/0:2.08	0/0:2.3	0/0:2.26	0/0:2.34	0/1:1.2	0/0:1.58	0/0:2.52	0/0:2.14	0/1:1.16	0/0:2.44	0/0:2.16	0/0:2.22	0/0:2.28	0/1:1.24	0/0:2.18	0/0:2.34	0/1:1.2	0/0:2.22	0/0:2.1	0/0:2.08	0/0:2.32	0/0:1.92	0/1:1.12	0/0:2.52	0/0:2.3	0/0:1.98	0/0:2.2	0/0:2.22	0/0:1.98	0/0:1.9	0/0:2.28	0/0:1.92	0/0:2.48	0/0:1.96	0/0:1.92	0/0:2.14	0/0:2.12	0/0:1.86	0/0:1.94
4	36695501	0.0872922	0.0365594	TRNAS-GGA(dist=1016246),LOC102168971(dist=435023)	intergenic	4:36695501-36703000	CN2,CNH	0.67245	0/0:2.32	0/1:2.82	1/1:4.52	0/0:2.32	0/0:2.16	0/0:2.18	0/0:2.3	0/1:2.76	0/0:2.18	0/1:3.24	2/2:6.22	0/0:2.24	0/0:2.1	0/0:2.28	0/0:2.3	0/0:2.3	0/0:2.0	1/2:5.54	0/0:2.36	0/1:2.68	1/2:4.92	0/0:2.42	0/0:2.08	0/0:2.06	0/1:2.62	0/0:2.46	0/0:2.42	0/0:2.2	0/0:2.28	0/0:2.08	0/0:1.86	0/0:2.0	0/0:2.08	0/0:1.98	0/0:2.16	0/0:2.18	0/0:1.78	0/0:2.16	0/0:1.8	0/0:2.28	0/0:1.92
4	37009001	-0.00366791	-0.00394557	TRNAS-GGA(dist=1329746),LOC102168971(dist=123023)	intergenic	4:37009001-37015000	CN0,CN2	0.770989	0/1:1.1	0/1:1.06	0/1:1.12	1/1:0.04	0/0:2.04	0/1:1.0	0/0:1.96	0/1:1.02	0/0:2.22	0/1:1.06	0/1:1.2	0/1:1.04	0/1:0.94	1/1:0.14	0/0:2.04	0/1:0.98	0/0:2.34	1/1:0.0	0/1:1.18	0/1:0.9	0/1:1.08	1/1:0.0	0/1:0.96	0/0:1.7	0/0:2.14	0/1:0.82	0/0:1.78	1/1:0.08	0/0:1.96	0/0:1.68	0/0:1.96	0/0:1.72	0/0:1.98	0/0:2.04	0/0:2.02	0/0:1.88	0/0:1.94	0/0:1.68	1/1:0.0	0/0:1.92	0/2:2.6
4	37632001	0.00999878	-0.00252105	LOC108635897	exonic	4:37632001-37638500	CN2,CNH	0.688043	0/0:1.76	0/0:2.06	0/0:2.2	0/0:1.78	0/0:1.54	0/0:1.76	0/0:1.82	0/0:1.8	0/0:2.08	0/0:2.1	0/0:1.62	0/0:1.76	0/0:1.66	0/0:1.56	0/0:1.64	0/0:2.22	0/0:1.92	1/2:4.76	0/0:1.84	1/1:4.06	0/0:1.72	0/0:2.04	0/0:1.68	0/0:1.66	0/0:1.62	0/0:1.86	0/0:1.76	1/1:3.96	0/0:1.52	0/0:1.92	0/0:2.02	0/0:2.12	0/0:1.9	0/0:2.06	0/0:1.8	0/0:2.08	0/0:2.08	0/0:2.08	0/0:1.74	0/0:1.96	0/0:1.94
4	38125501	0.00367491	0.00146449	VPS41	intronic	4:38125501-38129500	CN2	0.68492	0/0:2.04	0/0:2.06	0/0:2.0	0/0:2.0	0/0:2.16	0/0:1.98	0/0:1.94	0/0:1.86	0/0:2.0	0/0:1.86	0/0:1.94	0/0:2.16	0/0:1.92	0/0:1.92	0/0:1.86	0/1:3.06	0/0:2.0	0/0:1.98	0/0:2.26	0/0:1.7	0/0:1.94	0/0:2.08	0/0:1.98	0/0:2.04	0/0:1.7	0/0:2.06	0/0:2.12	0/0:2.08	0/0:1.96	0/0:1.84	0/0:2.02	0/0:2.1	0/0:2.16	0/1:2.86	0/1:2.84	0/0:2.06	0/0:2.18	0/1:2.98	0/0:1.72	0/1:2.6	0/1:2.92
4	40808001	0.128622	0.0963719	LOC102188920(dist=626279),INHBA(dist=48122)	intergenic	4:40808001-40814000	CN2	0.769432	0/0:2.12	0/0:2.1	0/0:2.3	0/1:2.62	0/1:2.84	0/0:2.04	0/1:3.32	0/0:2.3	0/0:2.26	0/1:3.12	0/0:2.26	0/1:3.0	0/1:3.26	0/1:3.32	0/1:3.1	0/0:2.12	0/0:2.14	0/0:1.9	0/0:1.82	0/0:2.04	0/0:2.12	0/1:3.26	0/0:2.1	1/1:3.84	0/0:2.08	0/0:2.32	0/1:2.64	0/1:3.06	0/0:2.02	0/0:2.14	0/0:2.08	0/0:2.06	0/0:2.04	0/0:2.22	0/0:2.38	0/1:2.78	0/1:2.52	0/0:2.04	0/0:1.94	0/1:3.04	0/0:2.4
4	41077001	-0.00848827	-0.00244195	INHBA(dist=200165),GLI3(dist=29673)	intergenic	4:41077001-41080500	CN2	0.685586	0/0:2.4	0/0:1.9	0/0:2.42	0/0:1.82	0/0:2.34	0/0:2.5	0/0:2.14	0/0:2.46	0/0:2.32	0/0:2.5	0/1:2.76	0/0:2.06	0/0:2.14	0/0:2.56	0/0:1.86	0/0:2.24	0/0:2.1	0/0:1.86	0/0:2.14	0/0:2.28	0/0:2.16	0/0:2.22	0/0:2.16	0/0:2.02	0/1:2.9	0/0:2.22	0/0:2.3	0/0:2.18	0/0:2.4	0/0:2.14	0/0:2.2	0/0:1.86	0/0:2.08	0/0:2.66	0/0:2.36	0/0:2.16	0/0:1.88	0/0:2.6	0/0:2.16	0/0:1.82	0/0:2.18
4	48860001	0.000996702	-0.00106851	NPY(dist=241675),MPP6(dist=78078)	intergenic	4:48860001-48863000	CN0	0.692376	0/1:1.02	0/1:1.02	0/1:0.7	0/1:0.92	0/1:1.06	0/1:1.14	0/1:1.08	0/1:1.12	0/1:0.98	0/1:1.0	0/1:1.04	0/1:0.94	0/1:1.14	0/1:1.24	0/1:0.92	0/1:1.1	0/1:1.06	0/1:0.86	0/1:1.46	0/1:0.96	0/1:0.84	0/1:1.14	0/1:1.14	0/1:0.94	0/1:1.04	0/1:0.96	0/1:1.2	0/1:1.3	0/1:1.0	0/1:0.82	0/1:0.82	0/1:0.72	0/1:0.88	0/1:1.0	0/1:0.9	0/1:1.06	0/1:0.8	0/1:0.94	0/1:1.06	0/1:0.88	0/1:0.76
4	49257501	-0.0114294	-0.00653723	OSBPL3	intronic	4:49257501-49261500	CN2	0.759182	1/1:3.98	0/0:1.82	0/0:2.02	0/0:2.02	1/1:4.24	0/0:2.1	0/0:1.98	0/0:1.98	0/0:2.08	0/0:2.18	0/0:2.32	0/0:2.08	0/0:1.94	0/0:1.4	0/0:1.88	0/0:1.82	0/0:2.18	0/0:1.96	0/0:2.02	0/0:2.04	0/0:2.14	0/0:1.78	0/0:1.92	0/1:3.54	0/0:1.98	0/0:2.16	0/0:2.12	0/0:2.14	0/0:1.7	0/0:2.2	0/0:2.22	0/0:2.38	0/0:1.94	0/0:1.94	0/0:2.16	0/0:2.08	0/0:2.12	0/0:2.36	0/0:2.04	0/0:2.02	0/0:1.84
4	49635501	-0.00741568	-0.00313902	NPVF(dist=63425),LOC108635844(dist=573716)	intergenic	4:49635501-49644500	CN2	0.672593	0/0:2.26	0/0:2.18	0/1:2.7	0/0:2.48	0/0:2.1	0/0:2.1	0/0:2.06	0/0:2.26	0/0:2.04	0/0:2.42	0/0:2.46	0/0:2.04	0/0:2.08	0/1:2.64	0/0:2.1	0/0:2.1	0/0:2.36	0/1:2.62	0/0:2.46	0/0:1.9	0/0:2.14	0/0:2.2	0/0:2.1	0/0:2.24	0/0:2.22	0/0:2.12	0/1:2.52	0/0:2.44	0/0:2.32	0/0:2.26	0/0:2.16	0/0:2.24	0/0:2.18	0/0:2.12	0/0:2.12	0/0:1.82	0/0:2.28	0/0:2.16	0/0:2.18	0/0:2.2	0/0:2.12
4	62498001	0.0562685	0.036636	IMMP2L	intronic	4:62498001-62501500	CN0	0.781867	0/1:1.24	0/0:2.02	0/0:1.62	0/0:2.1	1/1:0.12	0/0:2.24	0/1:1.22	0/0:2.22	0/1:1.06	0/0:2.3	0/0:1.78	0/1:1.2	0/0:2.12	0/0:2.32	0/0:2.26	0/0:2.06	1/1:0.08	0/0:1.96	0/0:2.14	0/1:1.32	0/1:1.14	0/1:1.38	0/1:1.28	0/1:1.38	0/0:2.04	0/1:1.16	0/0:2.14	0/1:1.0	0/1:1.16	0/1:1.22	0/0:2.3	0/1:1.0	0/1:1.16	1/1:0.14	0/1:1.2	0/1:1.04	1/1:0.12	0/1:1.12	0/0:2.08	0/0:2.16	0/0:2.76
4	62673501	0.0158742	0.00220111	IMMP2L	intronic	4:62673501-62677000	CN2	0.699802	0/0:2.04	0/0:2.18	0/0:2.08	0/0:2.14	0/0:1.86	0/0:2.36	0/0:2.22	0/0:2.1	0/0:2.1	0/0:2.02	0/0:2.04	0/0:2.16	0/0:1.98	0/1:2.7	0/0:2.36	0/0:2.02	0/0:2.2	0/0:2.32	0/0:1.72	0/0:2.34	0/0:1.82	0/0:2.28	0/0:2.18	0/0:2.06	0/0:2.28	0/0:2.3	0/0:1.9	0/0:2.38	0/0:2.18	0/0:1.96	0/0:2.24	0/0:1.92	0/0:2.08	0/0:1.88	0/0:2.04	0/0:1.82	0/0:1.78	0/0:2.26	0/0:2.0	0/0:2.16	0/0:2.34
4	64584001	0.00416198	0.00805304	TMEM168(XM_018047177.1:c.*4448_*1579delins0,XM_018047176.1:c.*4448_*1579delins0,XM_018047175.1:c.*4448_*1579delins0)	UTR3	4:64584001-64587000	CN0,CN2,CNH	0.69522	0/2:2.72	0/0:2.28	0/0:2.46	0/0:2.06	0/2:3.12	0/0:2.1	0/0:2.0	0/0:1.66	0/0:1.88	0/0:1.98	0/0:2.16	0/2:2.9	0/0:2.02	0/0:2.08	0/2:3.38	0/2:2.68	0/0:1.96	0/0:1.6	0/0:2.08	0/0:2.08	0/0:2.18	0/0:1.86	0/2:2.88	0/0:2.34	0/0:2.5	0/0:1.5	0/2:2.86	0/0:2.16	0/0:2.44	0/2:3.12	0/0:2.08	0/0:1.94	0/0:1.78	0/0:1.9	0/0:1.9	0/0:2.14	0/0:2.06	0/0:2.34	0/2:3.22	0/0:2.18	0/1:0.7
4	67750501	-0.00982324	0.00220828	MDFIC(dist=944753),TFEC(dist=16559)	intergenic	4:67750501-67764000	CN0,CN2	0.673896	0/0:2.1	0/1:1.12	0/0:2.18	0/0:1.92	0/0:2.22	0/0:2.06	0/0:2.16	0/0:2.4	0/1:1.0	0/0:2.32	0/0:2.24	0/0:2.04	0/0:2.12	0/0:2.14	0/2:2.56	0/1:1.1	0/0:2.34	0/0:2.2	0/0:1.96	0/0:2.3	0/0:2.06	0/0:2.34	0/0:2.24	0/0:1.94	0/0:2.22	0/0:2.16	0/0:2.24	0/0:2.06	0/0:2.22	0/1:0.98	0/0:2.0	0/0:2.0	0/0:2.0	0/0:1.8	0/0:2.08	0/0:2.0	0/0:1.86	0/0:2.12	0/0:2.06	0/0:2.08	0/0:2.12
4	70114001	-0.000716631	0.00282685	LOC108635900,LOC108635901	exonic	4:70114001-70132000	CN0,CN2	0.722334	0/2:2.62	0/2:2.68	0/2:2.72	0/2:2.88	0/2:2.72	0/2:2.82	0/2:2.62	0/0:1.78	0/2:2.7	0/2:2.88	0/2:2.56	0/2:2.6	0/0:1.82	0/2:3.2	0/2:2.6	0/0:1.84	0/2:2.5	0/2:2.52	0/1:1.12	0/0:1.8	0/2:2.68	0/2:2.54	0/0:1.84	0/2:2.7	0/0:1.74	0/2:2.9	0/2:2.98	0/2:2.7	0/0:1.86	0/2:2.76	0/2:2.9	0/2:2.84	0/1:0.98	0/2:3.0	0/0:1.9	0/0:2.08	0/2:2.94	0/2:2.82	0/2:2.72	0/2:3.02	2/2:3.62
4	72324001	0.11505	0.0330451	PIK3CG(dist=32396),CCDC71L(dist=153791)	intergenic	4:72324001-72328000	CN0	0.756611	0/0:1.98	0/0:2.06	0/0:1.92	0/0:1.84	0/1:1.22	0/0:2.36	0/1:1.1	0/0:2.5	0/0:2.32	0/0:2.62	0/0:2.0	0/1:1.16	0/0:2.02	0/1:1.48	0/0:2.36	0/0:2.1	0/1:1.12	0/0:1.88	0/1:1.4	0/1:1.1	0/0:1.78	0/1:1.04	0/1:1.28	0/1:1.36	1/1:0.18	0/0:2.16	0/0:2.22	0/0:2.1	0/0:2.26	0/1:1.24	0/0:2.2	0/0:1.9	1/1:0.2	0/0:2.2	0/1:1.12	0/0:2.06	0/1:1.14	0/0:2.24	0/0:1.9	0/0:2.14	0/0:2.16
4	78981501	0.0174509	0.0243427	MAGI2(dist=482761),GNAI1(dist=247760)	intergenic	4:78981501-78985000	CN0	0.718635	0/0:2.14	0/0:1.92	0/0:1.62	0/0:2.16	0/0:1.84	0/0:2.34	0/0:1.92	0/0:1.86	0/0:2.0	0/0:2.28	0/0:2.5	0/0:2.34	0/0:2.08	0/0:2.08	0/0:2.14	0/0:1.96	0/0:2.1	0/0:1.92	0/0:2.18	0/0:2.44	0/0:2.24	0/0:2.2	0/0:1.98	0/0:1.76	0/0:2.06	0/0:2.2	0/1:1.46	0/0:2.06	0/0:2.0	0/0:1.86	0/0:1.72	0/0:1.9	0/0:1.98	0/0:1.96	0/0:2.14	0/1:1.2	0/0:2.0	0/0:1.62	0/0:2.32	0/0:2.1	0/0:2.56
4	79041001	-0.00474776	-0.00578382	MAGI2(dist=542261),GNAI1(dist=186760)	intergenic	4:79041001-79046000	CN0,CN2	0.733799	0/0:2.02	0/0:2.06	0/0:1.86	0/0:2.2	0/0:2.26	0/0:2.42	0/0:2.02	0/0:2.42	0/0:2.28	0/0:2.18	0/0:2.26	0/0:1.88	0/1:0.96	0/0:2.32	0/1:1.04	0/0:2.04	0/0:2.2	0/1:1.2	0/0:2.4	1/1:0.06	0/0:1.84	0/0:2.02	0/1:1.1	0/0:2.08	0/0:1.84	0/0:2.3	0/0:1.96	0/0:2.18	0/1:1.04	0/0:1.7	0/1:1.06	0/0:2.06	0/0:2.1	0/0:2.06	0/0:2.04	0/0:1.96	0/0:2.1	0/0:1.86	0/0:2.1	0/0:2.02	0/0:1.76
4	80035001	-0.00800357	-0.00393489	LOC108633303	intronic	4:80035001-80039500	CN0,CN2	0.662376	0/0:2.0	0/0:2.1	0/0:2.28	0/0:2.14	0/0:2.28	0/0:1.98	0/0:2.18	0/0:2.24	0/0:2.14	0/0:2.16	0/2:2.66	0/0:1.96	0/0:2.04	0/0:2.08	0/0:2.32	0/0:2.06	0/0:2.34	0/0:2.02	0/0:2.42	0/1:1.08	0/0:1.94	0/1:1.0	0/0:2.04	0/0:1.92	0/0:2.42	0/0:2.04	0/0:2.28	0/0:2.1	0/0:1.92	0/0:1.98	0/1:1.2	0/0:1.84	0/0:1.92	1/1:0.02	0/0:2.1	0/0:2.18	0/0:2.0	0/0:2.2	0/0:1.88	0/0:1.94	0/0:2.22
4	80621501	0.00038185	0.00590937	SEMA3C(dist=242185),TRNAC-ACA(dist=679519)	intergenic	4:80621501-80626000	CN0,CN2	0.68504	0/0:2.16	0/0:1.94	0/1:1.28	0/0:1.96	0/1:1.04	0/0:2.42	0/0:2.24	0/1:1.34	0/0:1.9	0/0:2.38	0/0:2.28	0/0:1.84	0/0:2.08	0/2:2.62	0/0:2.02	0/0:1.98	0/0:2.18	0/0:1.76	0/2:2.72	0/0:2.06	0/0:2.04	0/0:2.12	0/0:1.86	0/0:2.1	0/0:2.06	0/1:1.06	0/0:1.98	0/0:2.22	0/0:2.08	0/0:2.04	0/0:2.3	0/1:1.1	0/0:1.9	0/0:2.02	0/0:2.2	0/0:2.16	0/0:2.2	0/0:2.32	0/0:1.9	0/0:1.9	0/1:1.06
4	81783001	0.198157	0.100565	CACNA2D1	intronic	4:81783001-81787000	CN0,CN2	0.663453	0/1:1.1	0/0:2.12	0/0:2.2	0/1:0.94	0/0:1.96	0/0:2.16	0/1:1.0	0/2:2.58	0/0:1.6	0/1:0.82	1/1:0.0	0/1:1.0	0/0:2.18	0/0:2.2	0/0:1.54	0/1:1.02	0/0:2.1	0/0:2.2	0/0:2.4	1/1:0.0	0/1:1.02	0/0:1.9	0/1:1.08	0/0:1.84	0/1:0.94	0/0:2.26	0/0:2.42	0/0:2.1	1/1:0.0	0/0:1.9	0/0:2.1	0/0:2.36	0/0:1.86	0/0:2.26	0/0:2.06	0/0:1.84	0/0:2.14	0/0:2.02	0/0:2.14	0/0:2.28	0/0:2.38
4	81923501	0.0253504	0.0339754	CACNA2D1	intronic	4:81923501-81926500	CN0,CN2	0.651475	0/0:2.1	0/0:1.94	0/0:2.22	0/0:1.84	0/0:1.88	0/0:2.22	0/0:1.92	0/0:1.68	0/0:1.96	0/0:1.86	0/0:2.0	0/0:2.12	0/0:1.9	0/0:2.38	0/0:2.06	0/0:1.98	0/0:1.8	0/2:2.84	0/2:2.58	0/0:2.24	0/0:2.34	0/0:2.12	0/0:2.08	0/0:1.74	0/0:2.48	0/0:2.28	0/0:2.28	0/0:2.32	0/0:2.08	0/0:1.92	0/0:1.88	0/0:2.04	0/0:1.84	0/0:2.12	0/0:1.9	0/0:1.82	0/0:2.06	0/0:1.78	0/0:1.92	0/0:1.78	0/2:2.7
4	85020001	0.0222298	0.00744449	SEMA3D(dist=68490),LOC108635855(dist=619826)	intergenic	4:85020001-85026000	CN0	0.875598	0/1:1.24	1/1:0.22	1/1:0.1	1/1:0.2	0/1:1.2	0/1:0.94	1/1:0.1	1/1:0.12	1/1:0.08	1/1:0.18	1/1:0.08	1/1:0.12	1/1:0.16	1/1:0.3	0/1:1.26	0/1:1.14	1/1:0.14	1/1:0.08	1/1:0.1	0/1:1.22	1/1:0.18	0/1:1.08	0/0:2.28	0/1:1.04	1/1:0.04	0/1:1.18	0/0:2.04	1/1:0.08	0/1:1.2	1/1:0.1	0/1:1.18	1/1:0.12	0/0:2.24	0/1:1.08	0/1:1.04	0/1:1.08	0/0:1.74	0/0:2.04	0/1:1.24	0/1:0.98	1/1:0.16
4	85637501	0.00399975	0.0080042	SEMA3D(dist=685990),LOC108635855(dist=3326)	intergenic	4:85637501-85642500	CN2,CNH	0.716321	0/1:2.32	0/1:2.06	0/1:2.26	0/1:3.36	0/1:2.42	0/1:2.34	0/1:2.34	0/1:2.4	0/1:1.92	0/1:2.38	0/1:2.6	0/1:2.62	0/1:2.32	0/1:2.44	0/1:2.66	0/1:2.5	0/1:2.12	0/1:2.56	0/1:2.64	0/1:2.58	0/1:2.18	0/1:2.24	0/1:2.46	0/1:2.4	0/1:2.56	0/1:3.08	0/1:2.66	0/1:2.88	0/1:2.5	2/2:5.56	2/2:5.62	2/2:11.7	0/1:3.64	2/2:11.74	2/2:20.96	2/2:56.48	2/2:23.6	2/2:45.16	0/1:3.56	2/2:27.24	2/2:10.84
4	85966501	-0.0057873	-0.00296185	LOC108635855(dist=306222),TRNASTOP-UCA(dist=296968)	intergenic	4:85966501-85973000	CN0	0.83203	0/0:2.12	0/0:2.14	0/0:1.84	0/0:1.72	0/1:1.02	0/0:1.78	0/1:0.88	0/0:2.06	0/0:1.98	0/0:1.78	0/0:2.0	0/1:1.12	0/0:1.96	0/0:2.02	0/0:1.96	0/1:1.06	0/0:1.88	0/0:1.88	0/0:1.84	0/0:1.94	0/0:1.92	0/0:2.14	0/0:1.8	0/0:1.9	0/0:2.1	0/1:1.02	0/0:1.76	0/0:2.1	0/0:1.9	0/0:1.94	0/0:1.86	0/0:2.04	0/0:2.02	0/0:2.18	0/0:2.04	0/0:2.12	0/0:1.86	0/0:1.96	0/0:1.98	0/0:1.88	0/1:1.18
4	88078501	0.000890031	0.00881547	LOC102174202	intronic	4:88078501-88087000	CN2,CNH	0.795837	0/0:1.9	0/0:2.1	0/0:1.92	0/0:1.98	0/0:1.96	0/0:2.06	0/0:2.08	0/0:2.02	0/0:2.0	0/0:1.78	0/1:2.8	0/0:2.12	0/0:2.08	0/0:2.24	0/0:1.94	0/0:2.1	0/0:1.96	0/0:2.04	0/0:2.1	0/0:1.78	0/0:2.04	0/0:2.02	0/0:1.94	0/0:1.96	0/1:2.66	0/0:2.12	0/0:2.22	0/0:1.96	0/0:1.96	0/0:2.0	0/0:2.0	0/0:2.24	0/0:2.12	0/0:2.02	0/0:2.02	0/0:2.16	0/0:2.12	0/0:2.26	0/0:2.3	0/0:2.16	0/0:1.76
4	89811001	-0.000963503	0.018773	RAPGEF5(dist=154705),CDCA7L(dist=7374)	intergenic	4:89811001-89814500	CN2	0.650764	0/0:1.84	0/0:1.92	0/0:2.28	0/0:1.86	0/0:2.02	0/0:2.4	0/0:2.0	0/1:2.54	0/0:1.7	0/0:1.74	0/0:1.86	0/0:1.84	0/0:2.16	0/0:2.44	0/0:1.76	0/0:1.9	0/0:2.1	0/0:1.96	0/0:1.9	0/0:2.28	0/0:1.66	0/0:1.7	0/0:1.74	0/0:1.76	0/0:1.98	0/1:2.52	0/0:2.02	0/0:1.94	0/0:2.16	0/0:1.9	0/0:1.88	0/0:2.4	0/0:2.2	0/0:2.3	0/0:1.94	0/0:2.1	0/0:1.68	0/0:1.8	0/0:1.84	0/0:1.64	0/0:2.24
4	92216001	0.0342901	0.00660818	TWISTNB(dist=85337),FERD3L(dist=462873)	intergenic	4:92216001-92219500	CN0	0.713141	0/0:2.04	0/0:1.64	0/0:2.26	0/0:1.74	0/0:2.28	0/0:2.32	0/0:1.8	0/0:1.52	0/0:2.02	0/0:2.2	0/0:1.92	0/0:1.76	0/0:1.74	0/1:1.3	0/0:1.96	0/0:2.28	0/0:1.66	0/0:2.2	0/0:2.2	0/0:2.0	0/0:2.36	0/0:2.0	0/0:2.1	0/0:2.24	0/0:2.44	0/0:2.74	0/0:1.92	0/0:2.24	0/0:2.4	0/0:2.16	0/1:1.24	0/0:1.98	0/0:1.92	0/0:1.98	0/0:2.36	0/0:2.02	0/0:1.98	0/0:2.3	0/0:2.02	0/0:2.42	0/0:1.84
4	95800001	0.0126586	0.0213645	ISPD	intronic	4:95800001-95804000	CN0	0.820003	0/0:2.08	0/0:1.96	0/0:2.26	0/0:1.88	0/0:2.28	0/0:2.1	0/0:2.1	0/0:1.72	0/0:2.06	0/0:2.66	0/0:2.2	0/1:1.0	0/0:1.88	0/0:2.18	0/0:1.78	0/0:1.82	0/0:2.28	0/0:2.2	0/0:2.42	0/0:2.0	0/0:1.88	0/0:1.8	0/0:1.86	0/0:1.98	0/0:1.88	0/0:2.16	0/1:1.16	0/0:2.22	0/0:1.96	0/0:1.86	0/0:2.0	0/0:2.06	1/1:0.0	0/0:1.84	0/0:2.08	0/0:1.9	0/0:1.94	0/0:2.06	0/0:1.96	0/0:2.02	0/0:1.92
4	98993001	-0.00748539	-0.00563658	ETV1(dist=553927),ARL4A(dist=781429)	intergenic	4:98993001-99004000	CN0	0.865566	1/1:0.02	0/0:1.92	0/1:1.34	0/0:2.34	0/0:2.02	0/0:1.92	0/0:2.12	0/1:1.1	0/0:2.08	0/0:2.42	0/0:2.12	0/0:2.0	0/0:2.1	0/1:1.22	0/0:2.14	0/0:2.08	0/0:2.18	0/0:2.24	0/0:2.24	0/0:2.16	0/0:2.24	0/0:2.04	0/0:2.02	0/0:2.1	0/0:2.3	0/0:2.0	0/0:2.44	0/1:1.0	0/1:1.14	0/0:1.82	0/0:2.04	0/0:1.96	0/0:2.04	0/0:2.2	0/0:1.94	0/0:2.1	0/0:2.14	0/1:1.1	0/0:2.1	0/0:2.0	0/0:1.96
4	100817001	0.00698921	0.00844571	THSD7A	intronic	4:100817001-100821000	CN0	0.772049	0/0:1.96	0/0:1.86	0/0:2.0	0/0:2.04	0/0:2.02	0/0:2.34	0/0:2.12	0/0:2.2	0/0:2.0	0/0:2.16	0/0:1.82	0/0:2.12	0/0:2.12	0/0:1.5	0/0:1.92	0/0:1.92	0/0:2.48	0/0:1.68	0/0:2.52	0/0:2.2	0/0:2.22	0/0:1.9	0/0:2.08	0/0:2.2	0/0:1.8	0/0:2.4	0/0:2.18	0/0:1.86	0/0:2.06	0/0:1.88	0/0:2.02	0/0:2.32	0/0:1.96	0/0:1.94	0/0:1.72	0/0:2.12	0/0:2.1	0/0:1.96	0/0:1.76	0/0:2.16	0/0:2.1
4	101074001	0.00821909	-0.00214929	THSD7A(dist=17970),LOC108635920(dist=93602)	intergenic	4:101074001-101079500	CN0,CN2	0.67839	0/0:1.96	0/0:2.02	0/0:2.02	0/0:2.06	0/0:2.02	0/0:2.16	0/0:2.18	0/0:1.94	0/0:2.04	0/0:1.98	0/1:0.9	0/0:2.0	0/0:2.02	0/0:2.06	0/0:1.82	0/0:1.94	0/0:2.08	0/0:1.84	0/0:1.66	0/1:0.96	0/0:1.96	0/0:1.98	0/0:1.82	0/0:2.0	0/0:1.9	0/0:2.36	0/0:1.96	0/0:2.2	0/0:2.1	0/0:2.02	0/1:0.96	0/0:2.2	0/0:2.02	0/0:2.14	1/1:0.0	0/1:1.08	0/0:1.96	0/1:0.98	0/0:2.16	0/0:2.1	0/1:1.0
4	101267501	0.0971675	0.0484719	LOC108635920(dist=68897),PHF14(dist=28737)	intergenic	4:101267501-101271500	CN0	0.780588	1/1:0.02	0/1:1.02	0/1:1.08	0/0:2.24	0/1:1.1	0/0:2.24	0/0:2.34	1/1:0.0	1/1:0.0	0/1:1.24	0/1:1.4	0/0:2.08	0/0:2.0	0/0:2.24	1/1:0.0	0/1:1.08	1/1:0.0	0/1:1.3	0/1:0.74	0/0:2.02	0/0:1.98	0/1:0.96	0/0:1.9	0/1:1.04	1/1:0.0	0/0:1.98	1/1:0.0	0/0:1.88	0/0:2.04	1/1:0.02	0/0:2.06	0/0:1.94	0/0:2.04	0/0:1.96	0/0:1.88	0/0:2.02	0/0:2.08	0/0:2.0	0/0:2.08	0/0:1.9	0/0:1.74
4	103671501	0.00392389	0.00232892	NONE(dist=NONE),NXPH1(dist=83369)	intergenic	4:103671501-103675500	CN0	0.79623	0/0:1.78	0/1:0.88	0/0:2.36	0/0:1.9	0/0:1.88	0/0:1.86	0/0:1.92	0/0:2.1	0/0:2.0	0/0:2.06	0/0:1.78	0/0:1.86	0/0:1.94	0/0:2.5	0/0:1.9	0/0:1.66	0/0:2.06	0/1:1.04	0/0:1.98	0/0:1.8	0/0:2.06	0/0:1.86	0/1:0.9	0/0:1.82	0/0:2.0	0/0:2.08	0/1:1.16	0/0:2.12	0/0:1.68	0/0:1.94	0/0:1.88	0/0:2.0	0/0:1.68	0/0:1.78	0/0:2.2	0/0:2.1	0/0:2.26	0/0:1.78	0/0:2.06	0/0:1.9	0/0:2.08
4	106952501	0.0710967	0.0324476	LOC102184218(dist=16140),SLC25A13(dist=7022)	intergenic	4:106952501-106956000	CN0,CN2	0.650216	0/0:2.28	0/0:2.18	0/0:2.16	0/1:1.02	0/0:1.74	0/1:1.22	0/1:1.1	0/1:1.28	0/0:1.9	0/0:2.3	0/0:2.0	0/0:2.16	0/0:1.96	0/0:1.42	0/0:2.22	0/1:1.2	0/0:1.92	1/1:0.0	0/1:1.2	0/0:1.84	0/1:1.08	0/0:2.22	0/0:2.18	0/1:0.98	0/1:1.04	0/0:1.86	0/0:2.06	0/0:1.48	0/0:2.04	0/0:2.06	0/0:2.06	0/0:2.38	0/0:1.98	0/0:2.04	0/0:1.8	0/0:2.02	0/0:1.88	0/0:2.12	0/0:2.24	0/0:1.98	0/0:2.08
4	114246001	-0.00959123	-0.00304836	ABCA13(dist=894361),VWC2(dist=173778)	intergenic	4:114246001-114250000	CN0	0.785726	0/0:2.08	0/0:1.92	0/0:2.02	0/0:1.84	0/0:2.16	0/0:2.02	0/0:2.1	0/0:2.54	0/0:2.14	0/0:2.16	0/0:2.08	0/1:1.18	0/0:2.16	0/0:1.9	0/0:2.06	0/0:1.94	0/0:1.78	0/1:1.24	0/0:1.9	0/0:2.02	0/0:2.14	0/1:1.18	0/0:1.78	0/0:2.1	0/0:1.78	0/0:2.16	0/1:1.22	0/0:1.7	0/0:2.04	0/0:1.7	0/0:2.08	0/1:1.06	0/0:2.2	0/0:2.1	0/0:2.2	0/0:1.82	0/0:2.12	0/0:2.02	0/0:2.14	0/0:1.94	0/0:2.3
4	119561501	-0.00735169	-0.00365412	NONE(dist=NONE),VSTM2A(dist=416280)	intergenic	4:119561501-119574000	CN0,CN2	0.770416	0/0:1.96	0/1:1.1	0/0:2.0	0/0:2.08	0/1:1.12	0/1:0.86	0/1:1.1	0/0:2.02	0/0:2.16	0/1:1.0	0/0:2.02	0/1:1.06	0/1:1.2	0/0:1.88	0/0:2.36	0/0:1.94	0/0:2.22	0/0:1.94	0/1:0.92	0/0:1.96	0/1:1.22	0/0:2.34	0/1:1.16	0/1:1.08	0/0:1.98	0/0:2.12	0/0:1.98	0/0:2.34	0/0:2.34	0/0:1.76	0/0:2.02	0/0:1.88	0/0:2.14	1/1:0.0	0/0:2.14	0/0:2.0	0/0:1.98	0/0:2.06	0/0:2.12	0/0:1.98	0/1:1.24
4	120391501	0.0325222	0.0252403	VSTM2A(dist=376163),LOC108635927(dist=61899)	intergenic	4:120391501-120398500	CN0,CN2	0.723156	0/0:2.12	0/0:2.04	0/0:2.24	0/0:2.0	0/0:1.94	0/0:2.0	0/0:1.92	0/0:2.12	0/0:1.84	0/1:0.96	0/0:2.3	0/0:2.16	0/0:2.02	0/2:2.58	0/0:2.08	0/0:2.04	0/0:2.28	0/0:2.12	0/1:1.02	0/0:2.22	0/0:2.14	0/1:0.96	0/1:1.22	0/0:2.1	0/0:1.78	0/0:1.96	0/0:1.74	0/0:2.22	0/0:1.9	0/1:1.06	0/0:2.16	0/0:1.98	0/0:2.1	0/0:2.12	0/0:2.08	0/0:1.96	0/1:1.1	0/1:1.1	0/0:1.9	0/1:0.98	0/0:1.82
4	120631501	0.0339377	0.0207531	LOC108635861	ncRNA_intronic	4:120631501-120640000	CN0	0.853798	0/0:2.0	0/0:1.98	0/0:2.26	0/0:2.24	0/0:2.24	0/0:2.44	0/0:2.06	0/0:2.08	0/0:2.12	0/0:2.42	0/0:2.04	0/0:2.08	0/0:2.04	0/0:1.94	0/0:2.16	0/0:2.04	0/0:1.96	0/0:2.08	0/0:2.0	0/0:1.88	0/0:2.1	0/0:2.0	0/0:2.12	0/0:2.08	0/0:2.2	0/0:2.3	0/0:2.02	0/0:2.02	0/0:2.28	0/0:2.02	0/0:2.04	0/0:2.04	0/0:2.0	1/1:0.0	0/0:2.18	0/0:2.06	0/0:2.16	0/0:2.06	0/0:2.08	0/0:2.04	0/0:2.0
4	120642001	0.0339377	0.0313447	LOC108635861	ncRNA_intronic	4:120642001-120665500	CN0	0.885578	0/0:2.18	0/0:2.1	0/0:1.8	0/0:2.1	0/0:2.16	0/0:2.14	0/0:2.08	0/0:2.18	0/0:2.12	0/0:1.82	0/0:2.16	0/0:2.0	0/0:2.16	0/0:2.02	0/0:2.26	0/0:2.04	0/0:2.1	0/0:2.16	0/0:1.94	0/0:2.2	0/0:2.1	0/0:2.12	0/0:2.08	0/0:2.14	0/0:2.1	0/0:2.02	0/0:2.14	0/0:2.0	0/0:2.16	0/0:1.92	0/0:2.0	0/0:1.8	0/0:2.12	1/1:0.0	0/0:2.16	0/0:1.98	0/0:1.96	0/0:2.24	0/0:1.88	0/0:2.02	0/0:2.3
5	9501	0.00847243	0.00683153	NONE(dist=NONE),TSPAN8(dist=390720)	intergenic	5:9501-218500	CN2,CNH	0.882963	0/0:1.98	0/0:1.98	0/0:2.04	0/0:2.04	0/0:2.02	0/0:2.06	0/0:2.08	0/0:2.02	0/0:2.04	0/1:2.96	0/0:2.04	0/0:2.02	0/0:2.04	0/0:2.04	0/0:2.1	0/0:2.0	0/0:1.98	0/0:1.94	0/0:1.98	0/0:2.08	0/0:2.04	0/0:1.98	0/0:1.98	0/0:2.02	0/0:1.98	0/0:2.06	0/0:2.02	0/0:2.0	0/0:1.96	0/0:1.86	0/0:2.04	0/0:1.94	0/0:2.0	0/0:1.98	0/0:2.16	0/0:1.98	0/0:2.04	0/0:2.06	0/0:2.16	0/0:2.08	0/0:1.96
5	3123001	-0.00505632	-0.00197788	LOC102176392(dist=771159),ATXN7L3B(dist=727216)	intergenic	5:3123001-3129000	CN0,CN2	0.758334	0/0:1.92	0/0:2.06	0/0:2.02	0/0:2.0	0/0:1.82	0/0:1.7	0/0:1.9	0/0:1.76	0/0:1.94	0/1:1.14	0/0:1.8	0/0:2.1	0/0:2.06	0/0:1.7	0/0:2.06	0/0:2.04	0/0:2.04	0/0:1.6	0/0:1.9	0/1:1.04	0/0:2.08	0/0:1.82	0/0:2.02	0/0:1.8	0/0:1.96	0/0:1.98	0/0:1.72	0/0:2.04	0/1:0.92	0/0:1.94	0/0:2.1	0/0:1.98	0/0:1.96	0/0:2.04	0/0:2.06	0/0:1.9	0/0:1.74	0/0:1.88	0/0:1.92	0/0:2.0	0/0:2.2
5	5484501	0.0753061	0.0376908	NAP1L1(dist=70793),LOC102180999(dist=53603)	intergenic	5:5484501-5488000	CN0	0.771702	1/1:0.32	1/1:0.24	0/1:1.14	0/0:2.3	0/1:1.14	1/1:0.2	0/1:1.28	0/1:1.02	1/1:0.16	0/1:1.14	0/0:1.82	0/1:1.18	1/1:0.26	0/1:0.84	1/1:0.26	1/1:0.26	0/1:0.76	0/0:2.2	0/0:1.82	1/1:0.3	0/1:1.24	1/1:0.32	1/1:0.24	0/0:1.76	0/1:1.14	0/0:1.78	1/1:0.26	1/1:0.36	1/1:0.28	0/1:1.12	0/0:2.12	0/0:1.98	0/0:1.96	0/0:2.26	0/0:2.08	0/0:2.24	0/0:2.08	0/0:1.88	0/1:1.12	0/0:1.84	0/0:2.18
5	13661001	0.00201998	0.000908802	TMTC2(dist=1215913),SLC6A15(dist=699691)	intergenic	5:13661001-13667000	CN0	0.910857	0/1:1.06	0/1:0.92	0/1:1.0	1/1:0.0	0/1:1.08	0/1:1.26	0/1:1.06	1/1:0.0	0/1:1.1	0/1:1.38	1/1:0.0	1/1:0.02	0/0:2.16	1/1:0.0	0/0:2.02	0/1:1.08	0/1:1.12	0/1:0.96	1/1:0.0	1/1:0.06	0/0:2.36	1/1:0.02	1/1:0.0	0/1:0.96	1/1:0.0	1/1:0.06	1/1:0.0	0/1:0.96	1/1:0.0	1/1:0.0	1/1:0.0	1/1:0.0	1/1:0.0	1/1:0.0	1/1:0.0	1/1:0.0	1/1:0.0	1/1:0.0	0/0:1.9	1/1:0.0	1/1:0.04
5	15506001	0.0298739	0.0109964	NTS(dist=103036),MGAT4C(dist=24616)	intergenic	5:15506001-15509000	CN0	0.743337	0/1:1.26	0/0:1.96	0/0:2.2	1/1:0.2	0/0:2.12	0/1:1.26	0/1:1.1	0/1:1.48	1/1:0.1	0/1:1.32	0/1:0.88	0/1:1.34	0/1:1.24	1/1:0.34	0/0:2.24	1/1:0.12	0/1:1.06	0/1:1.08	0/1:1.08	0/1:1.18	0/1:1.18	0/1:1.0	1/1:0.12	1/1:0.24	0/1:1.08	0/1:1.0	0/0:1.7	0/0:2.26	0/1:0.9	0/1:1.58	0/0:2.08	0/0:1.86	0/0:1.94	0/0:1.8	0/0:2.08	0/0:2.04	0/0:2.14	0/0:1.72	0/1:1.2	0/0:1.92	0/0:2.2
5	15886001	-0.0047814	0.00210526	MGAT4C(dist=282264),TRNAC-ACA(dist=1403612)	intergenic	5:15886001-15892000	CN0	0.804573	0/0:2.02	0/0:2.02	0/0:2.14	0/0:1.82	0/1:0.96	0/1:1.0	0/1:1.04	0/0:2.36	0/0:2.02	0/0:1.88	0/0:2.16	0/0:1.98	0/0:1.92	0/0:1.88	0/0:2.1	0/0:2.1	0/0:1.88	0/0:2.1	0/1:1.02	0/0:2.08	0/0:2.12	0/0:2.08	0/1:1.0	0/0:1.9	0/0:2.04	0/0:1.96	0/0:2.06	0/0:2.14	0/0:2.14	0/0:1.82	0/0:1.94	0/0:1.8	0/0:2.08	0/1:1.14	0/0:1.96	0/0:2.06	0/0:1.78	0/0:2.16	0/0:2.14	0/0:1.96	0/0:2.06
5	17966501	0.0302412	0.0232195	TMTC3(dist=200439),KITLG(dist=48632)	intergenic	5:17966501-17996000	CN0	0.918992	0/0:2.0	0/0:2.12	0/0:1.98	0/0:2.04	0/0:2.08	0/0:2.0	0/0:2.14	0/0:2.14	0/0:2.16	0/0:2.12	0/0:2.08	0/0:2.0	0/0:2.06	0/0:2.0	0/0:2.16	0/0:1.98	0/0:1.98	0/0:2.04	0/0:2.12	0/0:2.02	0/0:2.12	0/0:2.08	0/0:2.12	0/0:2.04	0/0:2.1	0/0:2.1	0/0:2.04	0/0:2.04	0/0:2.1	0/0:2.04	0/0:2.0	0/0:2.08	0/0:2.02	0/0:2.0	0/0:1.98	0/0:2.12	0/0:2.0	0/0:2.0	0/0:2.06	0/0:2.06	0/0:2.06
5	18453001	0.0182203	0.00976386	KITLG(dist=301077),TRNAC-GCA(dist=198099)	intergenic	5:18453001-18472000	CN2	0.874339	0/0:1.96	0/0:1.98	0/0:1.84	0/0:2.06	0/0:2.08	0/0:2.04	0/0:1.94	0/0:2.24	0/0:2.1	0/0:1.96	0/0:2.12	0/0:2.0	0/0:2.02	0/0:2.08	0/0:2.12	0/1:3.2	0/0:1.74	0/0:2.2	0/0:2.14	0/0:2.06	0/0:1.94	0/0:2.08	0/0:2.0	0/0:2.04	0/0:1.96	0/0:2.18	0/0:2.06	0/0:2.02	0/0:2.06	0/0:2.08	0/0:2.06	0/0:2.04	0/0:2.04	0/0:1.96	0/0:1.96	0/0:2.02	0/0:2.06	0/0:2.1	0/0:1.98	0/0:1.98	0/0:2.02
5	20435501	-0.00893412	-0.000610376	LOC102175273(dist=159982),CCER1(dist=204723)	intergenic	5:20435501-20443500	CN0	0.856218	0/0:2.16	0/0:2.02	0/1:1.06	0/0:2.08	0/1:1.1	0/0:1.98	0/0:1.98	0/1:1.26	0/0:2.14	0/0:2.4	0/1:0.98	0/0:2.06	0/1:1.06	0/0:2.28	0/0:2.1	0/0:2.16	0/0:2.38	0/0:2.02	0/0:2.24	1/1:0.0	1/1:0.0	0/1:1.06	0/1:1.1	0/0:2.02	0/0:2.02	0/0:2.4	0/0:1.92	0/1:1.06	1/1:0.0	0/0:1.9	0/0:1.94	0/0:1.94	0/0:2.06	0/0:2.0	0/0:2.0	0/0:1.84	0/0:1.98	0/0:2.32	0/0:1.88	0/0:1.96	0/0:1.96
5	24346501	0.0023267	0.000440708	TMCC3(dist=196400),LOC102180728(dist=32794)	intergenic	5:24346501-24355000	CN0	0.85374	0/0:2.16	0/0:2.24	0/1:1.08	0/0:2.12	0/1:1.18	0/1:1.06	0/1:1.16	0/1:1.12	0/0:2.16	0/1:1.0	0/1:1.16	0/1:1.12	0/0:2.06	0/0:2.1	0/1:1.2	0/0:2.1	0/0:2.02	0/1:1.22	0/1:0.92	1/1:0.0	0/0:1.96	0/0:2.02	1/1:0.02	0/1:1.22	0/0:1.94	0/0:2.02	0/1:1.34	0/0:2.02	1/1:0.02	0/0:1.94	0/0:2.06	0/0:2.08	0/0:2.1	0/0:2.12	0/0:1.94	0/0:1.8	0/0:1.74	0/0:1.96	0/0:2.26	0/0:1.84	0/0:2.04
5	27130501	0.0249056	0.0293947	LOC108633262,LOC108635997	exonic	5:27130501-27155000	CN2,CNH	0.667476	1/1:4.14	0/1:3.26	0/1:3.08	1/1:4.3	2/2:6.04	1/1:4.46	0/1:3.06	0/1:3.36	1/1:4.36	1/1:4.08	0/1:3.08	1/1:3.94	1/1:4.18	0/1:3.54	0/1:3.42	0/1:3.32	1/1:4.54	1/1:4.32	0/1:3.14	0/0:2.4	1/1:3.94	1/1:4.2	0/1:3.12	0/1:2.86	0/1:3.1	1/1:4.34	0/1:3.28	0/1:3.2	0/1:3.1	0/1:3.34	1/1:4.12	1/1:4.42	1/2:4.84	1/1:4.34	1/1:4.22	0/1:3.08	0/1:2.96	0/1:3.54	1/1:4.18	0/1:3.16	1/1:4.12
5	27775501	-0.00776746	0.00220212	SCN8A	intronic	5:27775501-27779000	CN0	0.752753	0/1:1.0	0/1:1.14	1/1:0.06	0/0:1.68	0/0:1.96	0/0:2.22	0/0:2.0	0/0:1.72	0/0:2.22	0/1:0.8	0/0:1.4	0/0:2.14	0/0:1.52	0/1:1.06	0/1:0.82	0/0:2.0	0/1:1.04	0/0:2.14	0/0:1.78	0/0:2.28	0/0:2.04	0/1:1.06	0/0:2.16	0/0:1.66	0/0:1.94	0/1:0.9	0/0:1.44	0/1:0.82	0/0:2.14	0/0:2.54	0/1:1.02	1/1:0.06	0/0:1.94	0/0:2.08	0/0:2.08	0/0:2.16	0/0:2.48	0/0:1.98	0/1:1.24	0/0:2.4	0/1:0.92
5	30981001	0.0316635	0.00316884	LOC102171763(dist=1091),LOC102172036(dist=12787)	intergenic	5:30981001-30988500	CNH	0.943487	0/0:2.3	0/0:1.98	0/0:2.0	0/0:2.16	1/1:7.5	0/0:2.18	0/0:2.22	0/0:2.4	0/0:2.32	0/0:1.96	0/0:2.12	0/0:1.96	0/0:2.1	0/0:2.04	0/0:2.2	0/0:2.12	1/1:6.98	0/0:2.02	0/0:1.8	0/0:2.1	0/0:2.0	0/0:2.18	0/0:1.98	1/1:6.9	1/1:6.1	0/0:2.44	0/0:2.32	0/0:1.92	0/0:2.32	0/0:2.14	0/0:2.02	0/0:1.74	0/0:2.12	0/0:2.1	0/0:1.98	0/0:1.9	0/0:2.14	0/0:2.26	0/0:2.0	0/0:2.12	0/0:2.0
5	33769001	0.0654933	0.00536239	SCAF11	intronic	5:33769001-33776000	CN0,CN2	0.732216	0/0:2.1	0/0:2.3	0/0:2.14	0/0:1.9	0/0:2.44	0/0:2.04	0/0:2.18	0/0:2.1	0/0:2.06	0/1:1.1	1/1:0.0	0/1:1.26	0/0:1.92	0/2:2.8	1/1:0.04	0/0:1.96	0/1:1.1	0/1:1.04	0/1:0.96	0/0:2.1	0/0:2.16	0/1:1.18	0/0:2.1	0/0:1.96	0/0:2.16	1/1:0.06	0/0:2.48	0/1:0.92	0/0:1.9	0/0:2.32	0/0:1.94	0/0:1.86	0/0:1.94	0/0:2.06	0/0:1.94	0/0:1.92	0/0:1.86	0/0:1.84	0/0:1.98	0/0:2.08	0/0:2.14
5	35200501	0.0167123	0.000775092	NELL2	intronic	5:35200501-35203000	CN0,CN2	0.699492	1/1:0.0	0/0:1.96	1/1:0.0	0/0:2.42	0/0:2.18	0/0:2.24	1/1:0.0	0/0:1.86	0/0:2.14	0/0:2.5	0/0:2.38	0/1:1.3	1/1:0.0	0/1:1.36	0/0:2.08	0/1:1.14	0/0:2.12	0/1:1.02	0/1:1.28	0/1:1.12	0/0:2.18	0/1:1.14	0/1:1.04	0/0:1.82	0/0:1.6	0/0:2.24	0/0:1.94	0/0:1.98	0/1:1.08	0/0:2.08	0/0:2.32	0/0:2.14	0/0:1.96	0/0:2.22	1/1:0.06	0/1:1.26	0/0:2.14	0/1:0.74	0/0:2.26	0/0:2.14	0/0:2.32
5	36533001	0.0514523	0.0283424	ADAMTS20	intronic	5:36533001-36551000	CN0	0.882994	0/0:2.12	0/0:2.04	0/0:2.1	0/0:2.2	0/0:1.98	0/0:2.06	0/0:1.94	0/0:2.06	0/0:2.04	0/0:1.96	0/0:1.84	0/0:2.1	0/0:1.96	0/0:1.76	0/0:1.92	0/0:2.08	0/0:2.06	0/0:2.1	0/0:2.14	0/0:2.06	0/0:2.18	0/0:2.0	0/0:2.02	0/0:2.1	0/0:1.88	0/0:2.18	0/0:2.12	0/0:2.2	0/0:2.08	0/0:1.92	0/0:2.08	0/0:1.96	0/0:1.98	0/0:2.04	0/0:2.12	0/0:2.0	0/0:1.98	0/0:2.16	0/0:1.84	0/0:1.92	0/0:2.24
5	36551501	0.0265944	0.0357234	ADAMTS20	exonic	5:36551501-36710000	CN0,CN2	0.722542	0/0:2.38	0/0:2.42	0/2:2.52	0/0:2.44	0/0:2.4	0/0:2.42	0/0:2.44	0/0:2.46	0/0:2.46	0/0:2.42	0/0:2.44	0/0:2.38	0/0:2.36	0/2:2.74	0/2:2.5	0/0:2.38	0/0:2.32	0/0:2.48	0/2:2.56	0/2:2.52	0/0:2.4	0/0:2.44	0/0:2.4	0/0:2.36	0/0:2.38	0/0:2.4	0/0:2.4	0/0:2.42	0/0:2.38	0/0:2.3	0/0:2.26	0/0:2.32	0/0:2.3	0/0:2.36	0/0:2.32	0/0:2.26	0/0:2.3	0/0:2.36	0/0:2.34	0/0:2.34	0/0:2.36
5	37329001	0.0262691	0.0129664	ADAMTS20(dist=717608),PRICKLE1(dist=242622)	intergenic	5:37329001-37332500	CN0	0.760191	0/1:1.04	1/1:0.16	0/0:1.68	0/0:2.24	0/1:1.34	0/0:2.14	0/0:2.16	0/0:2.58	0/0:2.32	0/0:2.48	0/0:2.12	0/1:1.26	0/0:2.32	0/1:1.3	0/0:2.46	0/0:2.38	0/0:2.44	0/0:2.16	0/1:1.22	0/0:1.5	0/0:2.28	0/0:2.5	0/0:2.28	0/0:2.08	0/1:1.42	0/1:1.14	0/1:1.26	0/0:2.54	0/0:1.94	0/0:2.02	0/0:2.0	0/0:1.96	0/0:2.16	0/0:2.18	0/0:2.34	0/0:2.02	0/0:1.92	0/0:2.0	0/0:2.02	0/0:2.0	0/0:2.16
5	40531001	0.22928	0.102849	SLC2A13	intronic	5:40531001-40533500	CN0,CN2	0.722568	1/1:0.02	0/0:2.34	0/1:0.88	0/0:1.44	1/1:0.0	1/1:0.0	1/1:0.0	1/1:0.0	0/0:2.22	1/1:0.0	0/1:0.92	0/1:0.9	0/1:1.2	0/2:3.1	0/1:1.16	0/1:1.2	0/1:1.14	0/1:1.0	0/0:1.56	1/1:0.0	0/1:1.14	0/1:1.26	1/1:0.0	0/1:1.22	0/0:1.92	0/1:1.0	0/1:1.24	1/1:0.0	1/1:0.0	0/0:2.06	0/0:2.16	0/1:0.92	0/0:1.8	0/0:1.92	0/0:2.32	0/0:1.82	0/0:2.2	0/0:2.12	0/0:2.22	0/0:2.04	0/0:1.64
5	41473501	-0.00283728	-0.0052744	KIF21A(dist=18139),CPNE8(dist=190681)	intergenic	5:41473501-41489000	CN0	0.864736	0/1:1.1	0/0:2.1	0/1:1.08	0/1:1.24	0/1:1.12	0/0:2.0	0/0:2.14	0/1:1.08	0/0:2.02	0/0:2.2	0/0:2.1	0/0:1.98	0/0:2.06	0/1:1.28	0/0:2.24	0/0:2.22	0/0:2.22	0/0:2.14	0/0:2.24	0/0:2.02	0/0:2.04	0/1:1.12	0/0:2.26	0/0:2.0	0/0:1.9	0/0:2.3	0/0:2.14	0/0:2.3	0/0:2.06	0/0:2.06	0/0:2.02	0/0:1.9	0/0:1.92	0/0:1.84	0/0:2.22	0/0:2.0	0/0:1.96	0/0:2.3	0/0:1.9	0/0:1.9	0/0:1.96
5	41977001	0.00178279	0.00158493	CPNE8(dist=39711),PTPRR(dist=115235)	intergenic	5:41977001-41983500	CN0	0.968483	1/1:0.02	0/1:1.02	0/1:1.16	1/1:0.0	1/1:0.02	1/1:0.0	1/1:0.0	1/1:0.0	1/1:0.02	1/1:0.0	1/1:0.0	1/1:0.04	1/1:0.02	1/1:0.0	1/1:0.02	1/1:0.02	1/1:0.0	1/1:0.0	0/1:1.26	1/1:0.02	1/1:0.02	0/1:1.02	0/1:1.12	1/1:0.02	0/1:1.34	1/1:0.0	1/1:0.0	0/1:1.32	1/1:0.02	1/1:0.04	1/1:0.0	1/1:0.02	1/1:0.04	1/1:0.0	1/1:0.04	1/1:0.0	1/1:0.1	1/1:0.02	1/1:0.0	1/1:0.02	1/1:0.02
5	49313501	0.0179349	0.00618537	TMEM5(dist=38071),AVPR1A(dist=356350)	intergenic	5:49313501-49317500	CN0	0.776573	1/1:0.24	0/0:2.26	1/1:0.18	0/1:1.24	0/1:1.48	1/1:0.16	1/1:0.22	1/1:0.24	0/1:1.2	0/1:1.08	1/1:0.2	1/1:0.26	0/1:1.18	1/1:0.38	1/1:0.34	0/1:1.22	1/1:0.1	1/1:0.24	1/1:0.14	1/1:0.48	1/1:0.16	1/1:0.26	1/1:0.32	1/1:0.4	1/1:0.28	1/1:0.24	1/1:0.4	0/1:1.52	1/1:0.36	0/1:1.08	1/1:0.24	1/1:0.22	0/1:1.18	0/1:1.3	0/1:1.16	1/1:0.38	0/0:1.92	0/1:1.3	0/1:1.24	0/0:2.0	0/1:1.28
5	49608501	-0.00864874	-0.0037743	TMEM5(dist=333071),AVPR1A(dist=61350)	intergenic	5:49608501-49612500	CN0	0.91862	1/1:0.02	1/1:0.02	1/1:0.0	1/1:0.0	1/1:0.02	0/1:1.04	0/1:1.16	0/1:1.46	1/1:0.0	1/1:0.0	0/1:1.04	0/1:0.96	1/1:0.0	0/1:0.9	1/1:0.04	1/1:0.0	0/1:1.08	1/1:0.0	0/1:0.9	0/1:1.18	1/1:0.02	1/1:0.0	0/1:1.02	0/1:1.1	0/0:1.86	0/1:1.04	1/1:0.04	1/1:0.0	0/1:1.12	1/1:0.0	1/1:0.04	1/1:0.0	0/1:1.08	0/1:0.98	0/1:0.8	1/1:0.0	1/1:0.0	1/1:0.0	0/1:1.26	1/1:0.02	0/1:1.02
5	51151001	-0.00582038	-0.00186881	FAM19A2	intronic	5:51151001-51156000	CN0	0.789001	0/0:2.12	0/0:1.92	0/0:2.12	0/1:0.96	0/0:1.82	0/0:1.76	0/1:0.98	0/0:1.92	0/0:1.94	0/0:2.14	0/1:0.98	0/0:1.82	0/0:2.0	0/1:1.0	0/1:0.98	0/0:1.98	0/0:1.72	0/0:1.96	0/1:1.28	0/0:1.88	0/0:2.18	0/1:1.0	0/1:0.98	0/0:1.94	0/1:0.98	0/0:1.82	0/0:2.1	0/0:1.86	0/0:1.98	0/0:1.86	0/0:1.94	0/0:2.3	0/0:1.5	1/1:0.0	0/0:2.0	0/0:2.12	0/0:1.98	0/0:1.96	0/0:1.96	0/0:1.7	0/0:1.92
5	53308001	0.0393007	0.034407	SLC16A7(dist=146327),LOC102168329(dist=58724)	intergenic	5:53308001-53311000	CN0	0.655364	0/0:2.08	0/0:1.86	0/0:1.52	0/0:1.76	0/0:1.86	0/0:2.04	0/0:2.12	0/0:2.5	0/0:1.62	0/0:1.9	0/0:2.06	0/0:1.84	0/0:1.72	0/0:2.14	0/0:1.9	0/0:1.6	0/0:1.98	0/0:1.98	0/0:2.28	0/0:1.94	0/0:1.62	0/0:2.02	0/0:1.88	0/0:1.84	0/0:2.12	0/0:2.02	0/0:2.3	0/0:1.98	0/0:2.02	0/0:1.7	0/0:1.94	0/0:1.74	0/0:1.66	0/0:1.72	0/0:1.92	0/0:2.04	0/0:2.08	0/0:1.7	0/0:2.1	0/0:1.78	0/0:2.1
5	55782501	0.0435175	0.023191	LOC102183297	exonic	5:55782501-55800500	CN2,CNH	0.77358	0/0:2.28	0/0:2.14	0/0:2.3	0/0:2.16	0/0:2.3	0/0:2.18	0/0:2.14	0/0:2.34	0/0:2.22	0/0:2.08	0/0:2.3	0/0:2.08	0/0:2.08	0/0:2.48	0/0:2.1	0/0:2.18	0/1:3.18	0/0:2.3	0/0:2.12	0/0:2.14	0/0:2.1	0/0:2.02	0/1:3.1	0/0:2.1	1/1:3.9	0/0:2.14	0/0:2.02	0/1:3.2	0/0:2.22	0/0:2.32	1/1:4.18	1/1:4.3	0/0:2.26	0/0:1.98	0/0:2.14	0/1:3.22	0/1:3.2	0/1:3.02	0/0:2.18	0/0:2.16	0/0:2.06
5	55985501	0.0413894	0.00274463	SDR9C7(dist=53793),LOC102185066(dist=38225)	intergenic	5:55985501-56000500	CN0	0.859841	0/0:2.06	0/1:1.06	0/0:2.06	0/0:2.26	0/0:2.38	0/1:1.0	0/0:2.08	0/0:2.04	0/1:1.04	0/1:0.96	0/0:2.04	0/0:2.04	0/0:1.98	0/0:2.24	0/0:2.2	0/0:2.06	0/0:2.08	0/0:2.02	0/0:2.04	0/0:2.2	0/0:2.02	0/0:2.12	0/1:1.08	0/0:1.96	1/1:0.0	0/1:1.22	0/0:2.02	0/1:1.0	0/0:2.12	0/0:2.0	0/0:1.88	0/0:1.68	0/0:2.16	0/0:2.0	0/0:2.02	0/0:1.94	0/0:1.9	0/0:2.0	0/0:2.1	0/0:2.14	0/0:2.14
5	57149501	-0.00295472	-0.00318728	LOC102171767(dist=36789),LOC102181272(dist=4702)	intergenic	5:57149501-57153000	CN0,CN2	0.657232	0/1:1.4	0/1:1.44	0/1:1.16	0/0:1.72	0/1:1.1	0/1:0.94	0/1:1.2	0/1:0.96	0/0:2.64	0/0:1.54	0/1:0.88	0/1:1.08	0/0:1.48	0/1:1.42	0/1:1.34	0/1:0.9	0/1:1.16	0/0:1.76	0/1:1.02	0/1:1.22	0/1:0.98	0/1:1.4	0/0:1.76	0/1:1.14	0/0:1.96	0/0:2.08	0/1:1.02	0/1:1.2	0/1:1.24	0/1:1.04	0/0:1.5	0/0:2.26	0/0:1.64	0/0:1.84	0/0:2.02	0/0:2.68	0/0:2.5	0/0:2.08	0/1:1.14	0/1:1.08	0/1:1.12
5	57207001	-0.00140351	0.000955672	LOC102174004	exonic	5:57207001-57225500	CN2	0.713513	0/1:2.62	0/1:2.8	0/0:2.18	0/1:3.52	0/1:2.76	0/0:1.88	0/0:2.06	0/0:2.04	0/1:2.78	0/1:3.34	0/0:1.94	0/1:2.64	0/0:1.98	0/0:1.78	0/0:2.0	0/1:2.74	0/0:1.96	0/1:3.38	0/0:1.98	0/0:1.92	0/1:2.74	0/1:2.94	0/1:2.66	0/1:3.48	0/1:3.26	0/0:1.92	0/0:2.04	0/1:2.7	0/0:2.04	0/0:1.9	0/1:2.72	0/1:2.74	0/0:2.02	0/1:2.76	0/0:1.82	0/1:2.74	0/1:2.8	0/0:2.54	0/1:2.74	0/0:1.98	0/1:2.64
5	57270001	0.0348321	0.0226743	LOC102182383	exonic	5:57270001-57274500	CN0	0.805515	0/0:2.1	0/1:1.08	0/0:1.92	0/0:2.22	0/0:2.02	0/0:2.46	0/1:1.06	0/0:2.48	0/1:1.12	0/0:2.14	0/0:2.1	0/0:2.02	0/0:2.2	0/0:2.56	0/1:1.06	0/0:2.28	0/0:2.14	0/0:2.02	0/0:2.44	0/0:2.14	0/0:2.3	0/0:2.0	0/0:2.16	0/0:2.04	0/0:2.16	0/0:2.22	0/0:1.94	0/0:2.3	0/0:2.16	0/1:1.08	0/0:2.24	0/0:2.12	0/1:0.88	0/0:1.98	0/0:2.28	0/0:2.18	0/0:2.16	0/0:2.26	1/1:0.0	0/0:2.28	0/0:2.48
5	57539001	-0.00512187	0.00104461	LOC102176500	exonic	5:57539001-57547500	CN2	0.780248	0/1:2.78	0/1:3.12	0/0:2.06	1/1:4.0	0/1:2.72	0/0:2.02	0/0:2.06	0/0:2.24	0/1:2.72	1/1:3.98	0/0:2.0	0/1:3.12	0/0:1.96	0/0:2.06	0/0:1.92	0/1:2.94	0/0:1.64	1/1:4.04	0/0:2.34	0/0:2.14	0/1:3.0	0/1:3.2	0/1:2.86	1/1:3.64	0/1:3.3	0/0:2.06	0/0:1.92	0/1:3.08	0/0:2.06	0/0:1.78	0/1:3.22	0/1:3.14	0/0:2.1	0/1:2.78	0/0:2.04	0/1:2.82	0/1:3.02	0/1:2.68	0/1:2.92	0/0:2.02	0/0:1.88
5	57571001	-0.00637762	0.0041231	LOC102177036	exonic	5:57571001-57583500	CN2	0.734365	0/1:2.86	0/1:2.74	0/0:2.06	0/1:3.3	0/1:2.52	0/0:2.02	0/0:2.08	0/0:1.94	0/1:2.8	1/1:3.66	0/0:2.0	0/1:3.0	0/0:2.02	0/0:2.22	0/0:2.18	0/1:2.76	0/0:1.88	0/1:3.18	0/0:2.14	0/0:2.08	0/1:2.92	0/1:2.9	0/1:2.9	1/1:3.58	1/1:3.48	0/0:2.1	0/0:1.94	0/1:3.0	0/0:2.32	0/0:2.0	0/1:2.66	0/1:2.52	0/0:2.1	0/0:1.8	0/0:2.16	0/1:2.84	0/1:2.74	0/1:2.68	0/1:2.88	0/0:1.96	0/0:2.02
5	57623001	-0.00544431	-0.00339376	LOC102178148	exonic	5:57623001-57635000	CN2	0.741549	0/1:2.72	0/1:2.72	0/0:1.9	1/1:3.56	0/1:2.64	0/0:2.02	0/0:1.98	0/0:2.02	0/1:2.52	0/1:3.4	0/0:2.08	0/1:2.7	0/0:1.96	0/0:2.04	0/0:2.04	0/1:2.72	0/0:2.16	1/1:3.92	0/0:1.82	0/0:1.98	0/1:2.86	0/1:2.7	0/1:2.78	1/1:3.5	0/1:3.34	0/0:2.14	0/0:1.98	0/1:2.36	0/0:2.04	0/0:2.08	0/1:2.94	0/1:2.86	0/0:1.94	0/1:2.64	0/0:2.04	0/1:2.72	0/1:3.0	0/1:2.64	0/1:2.92	0/0:2.04	0/0:1.76
5	57787001	0.000904144	0.00436725	LOC102175276,LOC108636104	exonic	5:57787001-57874000	CN0	0.902197	0/0:2.02	0/0:1.98	0/0:1.96	0/0:2.12	0/0:1.74	0/0:1.96	0/0:2.06	0/0:2.16	0/0:1.96	0/0:1.9	0/0:2.0	0/0:2.08	0/0:2.04	0/1:1.0	0/0:2.04	0/0:2.02	0/0:1.98	0/0:2.06	0/0:2.0	0/0:2.02	0/0:2.06	0/0:2.0	0/0:2.1	0/0:2.02	0/0:2.1	0/0:2.08	0/0:1.98	0/0:1.98	0/0:2.0	1/1:0.06	0/0:2.06	0/0:2.04	0/0:1.94	0/0:2.06	0/0:1.96	0/0:2.02	0/0:2.04	0/0:1.94	0/0:2.0	0/0:1.94	0/0:2.28
5	67231001	0.00975711	0.011293	C5H12orf45	exonic	5:67231001-67234500	CN2	0.653467	0/0:1.98	0/0:2.58	0/0:1.9	0/1:2.78	1/1:3.74	0/0:2.4	0/0:1.82	0/0:2.28	0/1:3.24	0/0:1.96	0/0:1.7	0/1:2.72	0/0:2.52	0/1:2.96	0/0:2.06	0/1:2.8	0/0:2.36	0/0:2.44	0/0:2.36	0/0:2.1	0/1:3.08	0/1:2.72	0/0:2.0	0/0:2.5	0/0:2.1	0/0:2.3	0/0:2.18	0/0:2.22	0/1:3.1	0/0:1.98	0/0:2.02	0/0:1.98	0/0:2.28	0/0:2.06	0/0:2.26	0/0:1.98	0/0:2.12	0/0:2.14	0/0:1.92	0/0:1.92	0/0:1.98
5	71157501	-0.00556619	-0.00258569	LARGE1(dist=66484),TRNAR-CCU(dist=799995)	intergenic	5:71157501-71162000	CN2	0.658789	0/0:2.36	0/0:2.32	0/0:2.52	0/0:1.9	0/0:2.38	0/1:2.6	0/0:2.4	0/0:2.4	0/0:2.14	0/0:2.46	0/0:2.08	0/0:2.3	0/0:2.2	0/0:2.22	0/0:2.24	0/0:2.34	0/0:2.32	0/1:2.7	0/1:2.6	0/0:2.2	0/0:2.22	0/0:2.12	0/0:2.46	0/0:2.3	0/0:2.14	0/0:2.3	0/0:2.12	0/0:2.18	0/0:2.36	0/0:2.34	0/0:2.08	0/0:2.06	0/0:2.36	0/0:2.2	0/0:2.1	0/0:2.44	0/0:2.38	0/0:2.22	0/0:2.22	0/0:1.88	0/0:2.1
5	73246501	0.0776405	0.0375908	LOC102172428	exonic	5:73246501-73255000	CN2,CNH	0.81092	0/0:1.86	0/1:3.04	0/0:1.82	0/0:2.08	0/0:2.16	0/0:2.08	0/0:2.04	0/0:1.98	0/0:2.12	0/0:2.12	0/0:2.1	0/0:1.9	0/0:2.18	0/0:2.5	0/0:2.0	0/0:2.24	0/0:2.08	0/0:1.84	0/0:1.96	0/0:2.06	0/0:1.92	0/0:2.06	0/0:2.06	0/0:1.88	0/0:2.0	0/0:2.2	0/0:2.16	0/0:1.74	0/0:2.1	2/2:5.96	2/2:5.74	1/1:3.98	1/2:4.94	1/1:3.9	1/1:4.14	2/2:5.82	1/2:4.92	2/2:5.56	1/1:3.92	2/2:5.64	1/2:4.76
5	73341001	0.0809933	0.0519442	LOC102172041	exonic	5:73341001-73346000	CN2	0.747011	0/0:2.02	0/1:2.66	0/0:1.64	0/0:2.08	0/0:2.18	0/0:2.18	0/0:2.12	0/0:1.64	0/0:2.02	0/0:1.82	0/0:1.84	0/0:1.9	0/0:1.96	0/0:2.44	0/0:1.92	0/0:2.08	0/0:1.84	0/0:1.76	0/0:1.76	0/0:2.32	0/0:1.92	0/0:2.06	0/0:1.8	0/0:1.88	0/0:1.74	0/0:2.18	0/0:1.98	0/0:1.66	0/0:2.14	1/1:4.56	1/1:4.0	0/1:2.84	1/1:3.8	0/1:3.42	0/1:3.5	1/1:4.14	1/1:4.28	1/1:4.32	1/1:3.84	1/1:4.14	0/1:3.64
5	78439001	-0.00232178	0.00284904	TMTC1	intronic	5:78439001-78447000	CN0	0.848885	0/0:2.0	0/1:1.12	0/0:2.52	0/0:1.88	0/1:1.0	0/0:1.88	0/1:1.0	0/0:2.02	0/0:1.94	0/0:2.26	0/0:1.92	0/0:2.08	0/0:2.02	0/0:1.8	0/0:2.06	0/0:2.08	0/0:2.32	0/0:1.84	0/0:2.24	0/0:2.06	0/0:2.16	0/1:1.06	0/1:1.1	0/0:2.06	0/0:2.0	0/0:2.3	0/1:1.06	0/0:1.98	0/0:2.02	0/0:2.26	0/0:2.06	0/0:2.02	0/0:2.02	0/0:2.22	0/0:1.96	0/0:2.08	0/0:2.0	0/0:2.38	0/0:1.94	0/0:1.86	0/0:1.9
5	87015001	0.0577261	0.0148625	KCNJ8(dist=7384),LDHB(dist=90720)	intergenic	5:87015001-87018500	CN0	0.720264	0/0:1.96	0/0:1.72	0/0:1.6	0/0:1.88	0/0:1.92	0/0:2.22	0/0:1.78	0/0:2.28	0/0:1.64	0/0:1.82	0/0:1.7	0/0:1.56	0/0:1.86	0/0:1.98	0/0:2.02	0/0:1.86	0/0:1.84	0/0:1.86	0/0:2.08	0/0:1.7	0/0:1.76	0/0:2.26	0/0:2.1	0/0:1.78	0/0:1.94	0/0:1.86	0/0:1.76	0/0:1.74	0/0:1.72	0/0:1.74	0/0:1.94	0/1:1.04	0/0:1.84	0/0:1.8	0/0:2.2	0/0:1.76	0/0:2.08	0/0:2.0	0/0:1.98	0/0:1.9	0/0:2.28
5	87836501	-0.00795877	0.00107224	PDE3A	intronic	5:87836501-87840500	CN0,CN2	0.71196	0/0:2.32	1/1:0.04	0/0:2.5	0/1:1.38	0/0:1.9	0/1:0.9	0/0:2.22	0/1:1.52	0/1:1.04	0/1:1.16	0/0:2.38	0/0:2.26	0/0:2.34	0/0:2.26	0/0:2.26	0/0:2.0	0/1:1.44	0/1:1.2	1/1:0.1	0/0:2.5	0/1:1.1	0/1:1.24	0/1:1.2	1/1:0.48	0/1:1.26	0/1:1.12	0/1:1.14	0/0:2.34	0/1:1.42	0/1:1.18	0/1:1.04	0/0:2.3	0/0:2.18	1/1:0.02	0/0:1.96	0/0:1.9	0/1:1.08	0/1:1.06	0/0:1.94	0/0:2.16	0/1:1.66
5	88387001	-0.00805188	-0.00377768	TRNAW-CCA(dist=210381),AEBP2(dist=628277)	intergenic	5:88387001-88390000	CN0,CN2	0.687465	0/0:2.18	0/0:2.04	0/0:1.64	0/0:1.76	0/0:1.92	0/0:1.84	0/0:1.86	0/2:2.84	0/0:1.84	0/1:1.22	0/0:1.54	0/0:1.64	0/0:1.66	0/0:1.76	1/1:0.02	0/1:1.1	0/1:0.88	0/1:0.9	0/1:1.0	0/0:2.16	0/0:2.0	0/0:1.54	0/0:1.98	0/1:0.96	0/0:2.06	0/0:2.04	0/0:1.68	0/0:1.74	0/0:1.7	0/0:2.08	0/1:0.82	0/1:1.44	0/1:0.84	0/0:1.82	0/0:1.92	0/0:1.66	0/1:1.02	0/0:1.62	0/0:1.86	0/0:1.78	0/0:2.3
5	91113001	0.00234989	0.00524004	TRNAS-GGA(dist=115636),LMO3(dist=742803)	intergenic	5:91113001-91124000	CN0	0.861159	0/0:2.06	0/0:1.98	0/0:1.94	0/0:2.02	0/0:1.94	0/0:2.26	0/0:2.12	0/0:2.22	0/1:0.94	0/0:1.92	0/0:2.02	0/0:1.9	0/0:1.92	0/0:2.16	0/0:2.24	0/0:2.0	0/0:2.02	0/0:1.98	0/0:1.98	0/0:2.26	0/0:2.06	0/0:2.06	0/0:2.18	0/0:1.92	0/0:2.26	0/0:2.04	0/0:1.9	0/0:1.88	0/0:1.96	0/0:1.74	0/0:1.94	0/0:1.82	0/0:1.92	0/0:2.12	0/1:0.96	0/0:2.04	0/0:2.0	0/0:2.08	0/0:1.84	0/0:2.18	0/0:2.0
5	91124501	-0.000987813	-0.00222052	TRNAS-GGA(dist=127136),LMO3(dist=739303)	intergenic	5:91124501-91127500	CN0	0.741626	0/0:1.92	0/0:1.84	0/0:2.08	0/0:2.28	0/0:1.8	0/0:2.3	0/0:1.98	0/0:1.68	0/1:0.98	0/0:2.2	0/0:2.02	0/0:1.82	0/0:1.9	0/0:2.14	0/0:1.88	0/0:1.92	0/0:2.04	0/0:1.72	0/1:1.3	0/0:2.2	0/0:1.92	0/0:2.06	0/0:2.04	0/0:1.98	0/0:1.98	0/0:1.7	0/0:1.6	0/0:1.86	0/0:2.08	0/0:1.82	0/0:2.2	0/0:2.18	0/0:2.24	0/0:1.94	0/1:1.06	0/0:1.94	0/0:2.16	0/0:2.24	0/0:1.92	0/0:2.1	0/0:1.66
5	92717001	-0.000993482	0.00619824	STRAP(dist=84872),EPS8(dist=1068)	intergenic	5:92717001-92719500	CN0	0.653688	0/1:1.0	0/0:1.6	0/1:1.36	0/1:1.18	0/1:1.04	0/1:0.8	0/1:1.06	0/1:0.78	0/1:0.9	0/1:1.32	0/1:1.28	0/1:1.06	0/1:0.98	0/1:0.98	0/1:1.02	0/1:0.98	0/1:1.38	0/1:1.04	0/1:0.72	0/1:0.8	0/1:0.98	0/1:1.16	0/1:1.16	0/1:0.94	0/1:1.04	0/1:0.5	0/1:1.12	0/0:1.66	0/1:0.94	0/1:0.84	0/1:1.1	0/1:1.16	0/1:1.02	0/1:1.0	0/1:0.96	0/1:1.16	0/1:1.06	0/1:0.7	0/1:1.18	0/1:0.94	0/1:0.94
5	96342001	0.0117122	0.00433178	LRP6(dist=13529),BCL2L14(dist=3247)	intergenic	5:96342001-96349000	CN0	0.864722	0/0:2.06	0/1:1.1	0/0:1.88	0/1:1.02	0/1:1.12	1/1:0.0	1/1:0.0	0/0:1.88	0/1:1.06	0/1:0.88	0/1:0.86	0/1:0.96	0/1:1.12	1/1:0.0	1/1:0.02	0/1:0.92	1/1:0.04	0/0:1.58	0/1:1.2	0/1:1.36	0/0:1.82	1/1:0.04	1/1:0.02	0/1:0.98	1/1:0.0	0/0:2.0	0/0:1.98	0/0:1.86	1/1:0.0	0/0:1.88	0/1:0.98	1/1:0.0	0/0:1.86	0/0:1.84	1/1:0.0	0/1:1.1	1/1:0.0	0/0:2.16	0/0:1.94	1/1:0.0	1/1:0.0
5	97108501	0.0384512	0.0254858	LOC102170599(dist=15838),LOC102178801(dist=30754)	intergenic	5:97108501-97117000	CN0,CN2	0.797284	0/0:2.24	0/0:2.22	0/0:2.18	0/0:2.26	0/0:2.4	0/0:2.02	0/1:1.46	0/0:2.18	0/0:2.0	0/0:1.94	0/0:2.34	0/0:2.34	0/0:1.96	0/0:2.44	0/0:2.54	0/0:2.12	0/0:2.3	0/0:1.92	0/0:2.0	0/0:2.26	0/0:2.18	0/0:2.24	0/0:2.34	0/0:2.16	0/1:1.04	0/0:2.24	0/0:2.24	0/0:2.18	0/0:2.0	0/0:2.16	0/0:1.9	0/0:2.36	0/1:1.02	0/0:2.14	0/0:2.14	0/0:2.16	0/0:2.06	0/0:2.24	0/0:2.32	0/0:1.86	0/0:2.24
5	97777001	0.012107	0.0140644	LOC102182286	exonic	5:97777001-97780000	CN0	0.843772	1/1:0.28	1/1:0.12	1/1:0.16	1/1:0.34	1/1:0.02	1/1:0.14	1/1:0.1	1/1:0.14	1/1:0.3	0/1:0.8	0/1:0.96	1/1:0.04	0/1:1.06	1/1:0.48	1/1:0.08	1/1:0.02	1/1:0.0	0/1:0.78	1/1:0.0	1/1:0.24	1/1:0.12	1/1:0.06	1/1:0.14	1/1:0.14	1/1:0.0	1/1:0.12	1/1:0.28	1/1:0.32	1/1:0.0	0/1:1.26	1/1:0.3	1/1:0.28	1/1:0.2	0/0:2.14	0/0:2.06	0/1:0.98	1/1:0.2	0/0:2.12	1/1:0.14	1/1:0.16	0/1:1.0
5	98849501	0.0671308	0.0439578	LOC102190765(dist=80165),LOC108636060(dist=7760)	intergenic	5:98849501-98922000	CN2,CNH	0.863228	0/1:2.92	0/1:2.88	0/0:2.08	0/0:2.06	0/1:3.12	0/1:2.88	0/0:2.0	1/1:3.92	1/1:3.92	0/1:2.88	0/0:2.04	0/0:2.08	0/0:2.02	0/1:2.94	1/1:3.82	0/1:2.84	0/1:2.8	0/1:2.88	0/1:2.88	0/0:2.06	0/0:2.06	0/1:2.92	1/2:4.92	0/1:2.96	0/1:3.02	0/0:1.98	0/0:2.02	0/0:2.04	0/0:2.04	0/0:1.88	1/1:3.8	0/1:2.88	0/1:2.78	0/0:2.02	1/1:3.92	1/1:3.88	1/1:3.72	1/1:3.82	0/0:1.9	0/1:2.86	0/1:2.94
5	98929501	0.117892	0.0615177	LOC108636060	exonic	5:98929501-98935000	CN0	0.870452	0/1:1.2	0/1:1.14	0/0:1.92	0/0:1.92	0/1:1.28	0/1:0.86	0/0:1.94	1/1:0.38	1/1:0.12	0/1:1.18	0/0:2.3	0/0:2.14	0/0:1.86	0/1:1.02	1/1:0.24	0/1:1.06	0/1:1.1	0/1:1.16	0/1:1.28	0/0:2.2	0/0:2.34	0/1:1.06	0/1:1.1	0/1:1.32	0/1:1.14	0/0:2.14	0/1:1.44	0/0:2.12	0/0:2.02	0/0:2.1	1/1:0.16	0/1:1.28	0/1:1.18	0/0:2.1	0/1:1.12	1/1:0.16	1/1:0.14	0/0:2.04	0/0:1.96	1/1:0.12	0/0:2.4
5	98936001	0.0826525	0.0447699	LOC108636060	exonic	5:98936001-98943000	CN0	0.667612	0/1:1.1	0/1:1.14	0/0:1.8	0/0:2.1	0/1:1.08	0/1:1.42	0/0:1.92	0/1:0.54	1/1:0.16	0/1:1.4	0/0:1.96	0/0:2.0	0/0:1.8	0/1:1.2	1/1:0.2	0/1:1.04	0/1:1.04	0/1:1.16	0/1:1.34	0/0:1.94	0/0:2.16	0/1:1.16	0/1:1.18	0/1:1.26	0/1:1.36	0/0:1.76	0/0:2.06	0/0:1.84	0/0:2.02	0/0:1.94	0/1:0.54	0/1:1.24	0/1:1.38	0/0:1.98	0/1:1.34	0/1:0.58	0/1:0.64	0/0:2.24	0/0:2.18	1/1:0.44	0/0:2.04
5	98958501	0.0646236	0.0438186	LOC108636138	exonic	5:98958501-99171500	CN0,CN2,CNH	0.85418	0/1:1.02	0/1:1.14	1/1:0.06	1/1:0.06	0/1:1.26	0/1:0.98	1/1:0.08	0/0:1.96	0/0:2.18	0/1:1.1	1/1:0.08	1/1:0.1	1/1:0.08	0/1:1.14	0/0:2.3	0/1:1.08	0/1:1.14	0/1:1.22	0/1:1.12	1/1:0.1	1/1:0.08	0/1:1.16	0/2:3.02	0/1:0.98	0/1:1.2	1/1:0.06	1/1:0.06	1/1:0.06	1/1:0.06	1/1:0.18	0/0:1.82	0/1:0.88	0/1:0.92	1/1:0.06	0/0:1.88	0/0:1.8	0/0:1.74	0/0:1.82	1/1:0.14	0/1:1.0	0/1:1.02
5	99172501	-0.00265977	0.00362726	LOC102181491,LOC108633342	exonic	5:99172501-99307000	CN0,CN2	0.681294	0/2:2.7	2/2:3.64	0/2:2.74	0/2:2.74	0/2:2.96	0/0:1.94	0/0:2.34	0/2:2.64	0/2:2.78	0/0:2.38	0/2:2.84	0/2:2.76	0/2:2.72	0/2:2.68	0/2:2.92	0/0:2.34	0/2:2.86	0/2:2.92	0/0:2.46	0/2:2.86	0/2:2.8	0/0:2.42	0/2:2.74	0/2:2.72	0/0:2.46	0/2:2.78	0/0:2.36	0/2:2.84	0/2:2.76	0/0:1.76	0/0:2.32	0/1:1.52	0/0:1.94	0/2:2.76	0/2:2.82	0/1:1.18	0/1:1.12	0/1:1.2	0/0:2.08	0/2:2.74	0/0:2.08
5	99410001	0.0141739	0.0307405	LOC102184231	ncRNA_exonic	5:99410001-99430500	CN0,CN2	0.823193	0/1:1.1	0/1:1.14	0/1:1.34	0/0:2.18	0/1:1.12	0/0:1.96	0/0:2.02	0/1:1.24	0/1:1.08	0/1:1.16	0/1:1.3	0/1:1.12	0/1:1.06	0/0:2.4	0/1:1.4	0/1:1.04	0/1:1.08	0/0:2.0	0/0:2.28	0/0:2.02	0/0:1.94	0/1:1.22	0/0:2.06	0/0:1.92	0/1:1.18	0/0:2.2	0/0:2.04	0/1:1.18	0/0:2.02	0/1:1.16	0/0:1.82	0/1:0.98	0/1:1.28	0/1:1.16	0/0:2.2	0/1:1.22	0/1:1.16	0/1:1.3	0/0:2.34	0/0:2.12	0/1:1.3
5	100434501	0.02899	0.0210014	KLRG1(dist=101684),LOC102175560(dist=33098)	intergenic	5:100434501-100438000	CN0	0.663074	0/0:2.18	0/0:1.9	0/0:2.08	0/0:1.9	0/0:2.34	0/1:1.32	0/0:2.22	0/0:2.02	0/0:1.94	0/0:1.74	0/0:2.36	0/0:2.02	0/0:1.9	0/0:1.92	0/0:2.16	0/0:1.7	0/0:2.32	0/0:1.94	0/0:2.1	0/0:2.1	0/0:1.82	0/0:2.18	0/0:2.3	0/0:1.72	0/0:2.26	0/0:1.82	0/0:1.86	0/0:1.98	0/0:1.78	0/0:1.64	0/0:1.92	0/0:1.8	0/0:1.76	0/0:2.02	0/0:1.74	0/0:1.88	0/0:1.7	0/0:2.12	0/0:2.18	0/0:1.84	0/0:2.28
5	100878001	0.00624084	-0.00127238	LOC102186205(dist=24355),LOC108636063(dist=165227)	intergenic	5:100878001-100881000	CN0,CN2	0.751715	0/1:1.24	0/0:2.36	1/1:0.18	1/1:0.06	0/1:1.14	0/0:2.14	0/0:2.18	1/1:0.34	0/1:1.12	0/1:1.52	1/1:0.28	1/1:0.24	1/1:0.32	1/1:0.26	0/2:2.46	0/1:1.22	0/0:1.8	1/1:0.2	0/1:1.54	1/1:0.38	1/1:0.24	0/0:2.32	1/1:0.16	1/1:0.4	0/1:1.58	0/1:1.52	0/1:1.2	1/1:0.36	0/1:1.02	0/1:1.24	1/1:0.28	1/1:0.42	1/1:0.2	1/1:0.14	0/1:0.9	1/1:0.14	1/1:0.14	1/1:0.12	0/2:2.44	0/1:1.12	1/1:0.04
5	101232501	-0.00366829	-0.00559049	LOC102185542	ncRNA_exonic	5:101232501-101335000	CN0,CN2	0.768347	0/2:2.7	0/2:2.66	0/2:2.64	0/2:2.62	0/2:2.96	0/2:2.66	0/2:2.82	0/0:1.78	0/0:1.7	0/2:2.76	0/2:2.78	0/2:2.7	0/2:2.62	0/2:3.34	0/2:2.94	0/2:2.7	0/2:2.76	0/0:1.68	0/0:1.92	0/0:1.7	0/0:1.68	0/2:2.8	0/2:2.74	0/0:1.8	0/0:1.9	0/2:2.64	0/0:1.84	0/2:2.58	0/2:2.82	0/0:2.42	0/2:2.5	0/0:2.42	0/2:2.56	0/2:2.56	0/0:1.7	0/0:1.64	0/0:1.58	0/2:2.58	0/0:1.72	0/0:1.64	0/2:2.58
5	101523001	-0.00887728	-0.00371123	LOC102186669(dist=1592),LOC102168248(dist=272047)	intergenic	5:101523001-101538500	CN2	0.851207	0/0:1.88	0/0:2.06	1/1:3.76	0/1:2.74	0/0:2.0	0/0:2.0	0/0:2.14	0/1:2.86	0/0:2.04	0/1:2.96	0/1:2.8	0/0:1.9	0/1:2.84	0/0:1.86	0/0:2.08	0/0:2.0	0/1:3.08	0/1:3.2	0/0:1.96	0/0:1.82	0/1:2.68	0/0:1.92	0/1:2.78	0/1:2.88	0/0:2.1	0/0:2.0	0/0:2.02	0/1:2.98	0/0:2.0	0/0:1.9	0/0:2.04	0/0:2.12	0/1:2.66	0/1:3.02	0/0:2.1	0/0:1.92	0/0:2.0	0/0:2.1	0/1:3.12	0/0:2.1	0/1:2.88
5	101539501	0.087482	0.0888086	LOC102186669(dist=18092),LOC102168248(dist=267047)	intergenic	5:101539501-101543500	CN2	0.684391	0/0:1.96	0/0:2.12	1/1:4.06	0/1:2.98	0/0:2.16	0/0:1.92	0/0:1.96	0/1:3.06	0/0:2.24	0/1:2.86	0/1:3.08	0/0:2.16	0/1:2.78	0/0:1.76	0/0:2.24	0/0:1.92	0/1:2.88	0/1:2.78	0/0:2.2	0/1:2.54	0/1:2.62	0/0:2.18	0/1:2.94	0/1:3.1	0/0:2.34	0/0:2.06	0/0:2.18	0/1:3.22	0/0:1.88	0/0:1.94	0/0:1.48	0/0:1.78	0/0:1.54	0/0:1.74	0/0:2.36	0/0:2.0	0/0:1.72	0/0:1.84	0/0:2.2	0/0:1.98	0/0:2.02
5	101545001	0.00365726	0.00307281	LOC102186669(dist=23592),LOC102168248(dist=24547)	intergenic	5:101545001-101786000	CN0,CN2	0.869171	0/0:2.24	0/2:3.02	0/1:1.32	0/1:1.32	0/0:2.28	0/2:3.14	0/2:3.08	0/1:1.42	0/0:2.26	0/0:2.22	0/1:1.32	0/1:1.36	0/1:1.36	0/1:1.42	0/2:3.16	0/0:2.2	0/0:2.24	0/1:1.44	0/0:2.22	0/1:1.28	0/1:1.38	0/2:3.14	0/1:1.32	0/1:1.48	0/0:2.18	0/0:2.14	0/0:2.26	0/1:1.32	0/0:2.22	0/0:2.1	0/1:1.32	0/1:1.32	0/1:1.22	0/1:1.26	0/0:2.22	0/1:1.26	0/1:1.28	0/1:1.28	0/2:3.06	0/0:2.2	0/1:1.26
5	115498001	0.00580782	0.00724245	LOC108636121	exonic	5:115498001-115517000	CN2	0.831382	1/1:3.86	0/1:2.7	0/1:3.0	0/1:2.76	0/1:2.86	0/1:2.92	0/1:2.84	0/1:2.7	0/1:2.8	1/1:3.84	0/1:2.78	0/1:2.76	0/1:2.74	1/1:4.06	1/1:3.86	0/1:2.86	0/1:2.78	1/1:3.62	0/1:2.7	0/1:2.8	0/1:2.66	0/1:2.72	0/1:2.76	0/1:2.9	0/1:2.72	0/1:3.16	0/1:2.8	1/1:3.8	0/1:2.88	0/1:3.08	0/1:2.76	0/1:2.92	0/1:2.9	0/1:2.72	0/1:2.8	0/1:2.92	0/1:2.68	0/1:2.9	0/1:2.9	0/1:2.74	0/1:2.72
5	115749001	0.00560654	0.0434657	CELSR1	exonic	5:115749001-115753000	CN0,CN2	0.660346	0/1:1.02	0/1:1.46	0/1:1.42	0/1:1.28	0/1:1.32	0/0:1.86	0/1:1.44	0/0:1.84	0/1:1.4	0/1:1.3	0/1:1.36	0/1:1.18	0/1:1.36	0/0:1.76	0/1:1.16	0/1:1.4	0/1:1.28	0/1:1.06	0/1:1.52	0/0:1.72	0/1:1.36	0/1:1.04	0/1:1.24	0/1:1.34	0/1:1.44	0/0:1.84	0/1:1.26	0/1:1.3	0/1:1.26	0/1:1.12	0/1:1.12	0/1:1.02	0/1:1.12	0/1:1.18	0/1:1.14	0/1:0.92	0/1:1.18	0/1:1.46	0/1:1.1	0/1:1.22	0/1:1.06
[truncated: 219 more rows]
[truncated: 222 more columns]

## Sheet: 26 PIS versus 20 normal
Table S6.CNV genotype in individuals with annotation and Fst&Vst results between two comparisons (2) 26 PIS versus 20 normal Tanshan milk goats
[truncated: 1,059 more rows]
[truncated: 222 more columns]
