# Supplementary material for: Identification of a Goat Intersexuality-Associated Novel Variant Through Genome-Wide Resequencing and Hi-C
Source: Front Genet. 2021 Feb 9;11:616743. doi: 10.3389/fgene.2020.616743 (PMC7901718; doi:10.3389/fgene.2020.616743)
Supplement: Supplementary file 8 [file Table_8.xlsx]

## Sheet: Hic_0357_loop_enriched_pixels_5
Table S8. Loop information of intersex goat obtained via Hi-C analysis.
#chr1	x1	x2	chr2	y1	y2	name	score	strand1	strand2	color	observed	expectedBL	expectedDonut	expectedH	expectedV	binBL	binDonut	binH	binV	fdrBL	fdrDonut	fdrH	fdrV
# juicer_tools version 1.9.9
10	120000	125000	10	195000	200000	.	.	.	.	0,0,0	18	4.74533	4.81677	6.60539	6.12503	6	6	8	7	0.000711911	0.00136262	0.0405628	0.010062
10	120000	125000	10	200000	205000	.	.	.	.	0,0,0	16	4.10676	3.92057	5.07205	6.07976	6	5	7	7	0.00461177	0.00256764	0.0419077	0.0437082
10	120000	125000	10	220000	225000	.	.	.	.	0,0,0	26	8.69682	7.51092	11.0772	6.15111	9	8	10	7	0.000299597	4.27594e-05	0.0097313	3.73418e-06
10	135000	140000	10	220000	225000	.	.	.	.	0,0,0	27	7.2204	7.71216	7.83298	6.63824	8	8	8	8	6.8662e-06	1.53397e-05	2.88206e-05	2.53e-05
10	220000	225000	10	485000	490000	.	.	.	.	0,0,0	12	2.86043	2.94287	3.69947	2.34737	4	4	5	3	0.0209391	0.0353788	0.0986332	0.0224049
10	315000	320000	10	500000	505000	.	.	.	.	0,0,0	20	4.78234	4.39071	3.82083	6.4227	6	6	5	8	8.77235e-05	0.000185581	2.89253e-05	0.010513
10	545000	550000	10	595000	600000	.	.	.	.	0,0,0	19	3.04795	5.51343	7.78073	9.23461	4	7	8	9	5.56238e-06	0.0027782	0.0225188	0.0835667
10	560000	565000	10	595000	600000	.	.	.	.	0,0,0	19	2.40142	6.68178	5.61026	6.99909	3	8	7	8	3.6129e-07	0.0110845	0.00440181	0.0214388
10	1240000	1245000	10	1285000	1290000	.	.	.	.	0,0,0	15	2.48511	2.83947	4.32888	3.29141	3	4	6	5	0.00020407	0.00185495	0.0275802	0.00963794
10	1350000	1355000	10	1580000	1585000	.	.	.	.	0,0,0	24	8.21632	5.25988	11.2068	7.89818	9	7	10	9	0.00139856	2.39246e-05	0.0294512	0.00427756
10	10270000	10275000	10	10570000	10575000	.	.	.	.	0,0,0	56	11.2501	8.77843	9.51876	13.6474	10	9	9	11	8.31213e-17	4.56075e-20	6.99133e-20	1.32844e-12
10	10275000	10280000	10	10570000	10575000	.	.	.	.	0,0,0	15	4.6654	3.66535	3.15519	4.84158	6	5	5	6	0.0107279	0.00690573	0.00832192	0.0288497
10	14290000	14295000	10	14440000	14445000	.	.	.	.	0,0,0	19	5.47418	6.39259	6.69341	6.17973	7	8	8	7	0.00143139	0.0110845	0.0225188	0.00453518
10	14440000	14445000	10	14780000	14785000	.	.	.	.	0,0,0	11	2.07614	1.78951	1.39878	1.81374	3	2	1	2	0.0246042	0.0253787	0.0109955	0.0255303
10	14830000	14835000	10	14885000	14890000	.	.	.	.	0,0,0	27	7.65699	10.2104	9.40154	10.7262	8	10	9	10	6.8662e-06	0.00243569	0.00049474	0.00579741
10	14830000	14835000	10	14890000	14895000	.	.	.	.	0,0,0	36	10.7739	14.2977	18.3456	16.5823	10	11	12	12	1.27911e-06	0.000102075	0.00572233	0.00648461
10	14835000	14840000	10	14890000	14895000	.	.	.	.	0,0,0	28	4.66729	7.34647	10.1581	10.3893	6	8	10	10	3.18613e-09	5.47935e-06	0.00269227	0.00303266
10	14840000	14845000	10	14890000	14895000	.	.	.	.	0,0,0	19	3.64567	5.90842	8.80225	9.77683	5	7	9	9	3.76889e-05	0.0027782	0.0811282	0.0835667
10	16615000	16620000	10	16650000	16655000	.	.	.	.	0,0,0	37	11.4291	14.543	18.2686	14.9577	10	11	12	11	4.93615e-07	4.69472e-05	0.00326503	0.000110166
10	16615000	16620000	10	16715000	16720000	.	.	.	.	0,0,0	53	15.4981	18.3085	29.1946	19.032	11	12	14	12	7.09913e-12	1.19545e-08	0.00148348	3.50205e-08
10	16615000	16620000	10	16740000	16745000	.	.	.	.	0,0,0	40	12.7569	9.58682	14.3439	14.0835	11	9	11	11	2.89359e-06	2.72585e-10	1.01265e-05	1.19731e-05
10	16615000	16620000	10	16745000	16750000	.	.	.	.	0,0,0	26	10.9778	7.36089	8.73584	10.7679	10	8	9	10	0.00350961	4.27594e-05	0.00104429	0.0106321
10	16615000	16620000	10	16750000	16755000	.	.	.	.	0,0,0	57	22.521	14.0973	16.3847	16.9966	13	11	12	12	1.98909e-07	1.99229e-13	8.42668e-10	8.12561e-10
10	16620000	16625000	10	16715000	16720000	.	.	.	.	0,0,0	35	8.81481	11.2464	15.6813	12.7436	9	10	12	11	5.13126e-08	5.73657e-06	0.00995103	0.000480434
10	16625000	16630000	10	16735000	16740000	.	.	.	.	0,0,0	12	2.75636	2.73125	2.36995	2.83376	4	4	3	4	0.0209391	0.0353788	0.0224015	0.0489862
10	16635000	16640000	10	16715000	16720000	.	.	.	.	0,0,0	64	16.7884	23.7124	29.6785	18.6657	12	13	14	12	1.28699e-13	7.4559e-10	3.06052e-06	5.7649e-13
10	16635000	16640000	10	16725000	16730000	.	.	.	.	0,0,0	26	8.1773	11.1061	12.4257	9.37455	9	10	11	9	0.000299597	0.00450532	0.0708907	0.000948172
10	16635000	16640000	10	16740000	16745000	.	.	.	.	0,0,0	45	12.0683	13.2965	15.2408	17.403	10	11	11	12	9.73058e-11	5.52855e-08	1.30654e-07	2.23466e-05
10	16715000	16720000	10	16750000	16755000	.	.	.	.	0,0,0	27	8.72015	11.5442	9.48637	11.2548	9	10	9	10	0.000132942	0.00243569	0.00049474	0.00579741
10	17100000	17105000	10	17335000	17340000	.	.	.	.	0,0,0	11	2.63568	2.36974	2.48395	1.92021	4	3	3	2	0.0491346	0.0472408	0.0538051	0.0255303
10	17335000	17340000	10	17675000	17680000	.	.	.	.	0,0,0	13	1.9747	2.30939	3.22107	2.35845	2	3	5	3	0.000990835	0.00654614	0.0486373	0.00750925
10	17335000	17340000	10	17775000	17780000	.	.	.	.	0,0,0	16	1.80507	1.9637	3.31809	2.10416	2	2	5	3	6.88078e-06	1.39668e-05	0.00314124	0.000151239
10	17675000	17680000	10	17775000	17780000	.	.	.	.	0,0,0	38	12.2053	9.73672	4.50436	13.2779	10	9	6	11	1.83632e-07	3.21982e-09	2.70032e-16	5.35069e-05
10	17775000	17780000	10	17855000	17860000	.	.	.	.	0,0,0	20	7.027	5.77497	5.69195	7.06848	8	7	7	8	0.00365306	0.00125312	0.00186628	0.010513
10	17775000	17780000	10	17945000	17950000	.	.	.	.	0,0,0	22	6.04407	7.66794	10.0914	8.16274	7	8	10	9	9.34461e-05	0.00131262	0.0787497	0.0160889
10	17775000	17780000	10	17955000	17960000	.	.	.	.	0,0,0	28	7.91392	9.00385	14.6022	7.62066	9	9	11	8	5.39532e-05	9.23762e-05	0.0287076	9.32257e-06
10	17905000	17910000	10	17955000	17960000	.	.	.	.	0,0,0	15	4.06037	4.73688	5.78821	4.49015	6	6	7	6	0.0107279	0.0174153	0.0779212	0.0288497
10	17920000	17925000	10	17955000	17960000	.	.	.	.	0,0,0	28	6.93749	18.0568	9.26257	9.32921	8	12	9	9	2.43993e-06	0.0911664	0.00021104	0.000187249
10	18200000	18205000	10	18280000	18285000	.	.	.	.	0,0,0	23	11.5787	10.6825	10.9349	11.5914	10	10	10	10	0.0210034	0.0232949	0.0495526	0.051787
10	18200000	18205000	10	18355000	18360000	.	.	.	.	0,0,0	16	5.60862	5.99187	5.2988	6.09529	7	7	7	7	0.0151448	0.0236047	0.0419077	0.0437082
10	18200000	18205000	10	18665000	18670000	.	.	.	.	0,0,0	19	4.61871	4.96304	7.19728	4.6108	6	7	8	6	0.000269132	0.0027782	0.0225188	0.000789944
10	18585000	18590000	10	18665000	18670000	.	.	.	.	0,0,0	30	5.14667	5.90726	6.7302	4.58447	7	7	8	6	7.04179e-09	1.29659e-08	1.06878e-06	3.80667e-10
10	20170000	20175000	10	20220000	20225000	.	.	.	.	0,0,0	23	11.5787	10.1267	9.25108	12.3559	10	10	9	10	0.0210034	0.0232949	0.00841452	0.051787
10	20175000	20180000	10	20210000	20215000	.	.	.	.	0,0,0	16	3.06001	5.29489	4.4421	4.77751	4	7	6	6	0.000268037	0.0236047	0.0124265	0.0132102
10	20515000	20520000	10	20560000	20565000	.	.	.	.	0,0,0	14	3.73882	3.67857	3.19774	4.43562	5	5	5	6	0.00871876	0.0163433	0.0211163	0.0587062
10	21615000	21620000	10	21650000	21655000	.	.	.	.	0,0,0	19	7.15085	7.91829	9.31011	7.03799	8	9	9	8	0.00762887	0.0407966	0.0811282	0.0214388
10	21615000	21620000	10	21755000	21760000	.	.	.	.	0,0,0	49	16.4102	20.7288	19.8635	29.4261	12	13	13	14	2.75987e-07	5.92585e-05	0.000154891	0.00882035
10	21650000	21655000	10	21755000	21760000	.	.	.	.	0,0,0	39	16.5474	16.1543	18.948	23.6009	12	12	12	13	0.000417066	0.000423736	0.00104077	0.0253346
10	21650000	21655000	10	21760000	21765000	.	.	.	.	0,0,0	30	11.0085	9.74464	10.5329	13.4149	10	9	10	11	0.000210039	1.58798e-05	0.000638216	0.0103054
10	21665000	21670000	10	21730000	21735000	.	.	.	.	0,0,0	18	3.32037	5.60947	7.45014	5.8056	5	7	8	7	0.000129896	0.00597717	0.0405628	0.010062
10	21665000	21670000	10	21755000	21760000	.	.	.	.	0,0,0	38	14.8685	16.4442	22.443	18.7443	11	12	13	12	1.46076e-05	0.00077613	0.0371362	0.00211685
10	21665000	21670000	10	21760000	21765000	.	.	.	.	0,0,0	29	9.80166	9.72035	12.1679	13.1093	9	9	10	11	2.20184e-05	3.74098e-05	0.00133429	0.0178204
10	21710000	21715000	10	21760000	21765000	.	.	.	.	0,0,0	24	4.22114	5.46115	4.10924	9.21648	6	7	6	9	7.98413e-07	2.39246e-05	1.96474e-06	0.00427756
10	21720000	21725000	10	21760000	21765000	.	.	.	.	0,0,0	34	4.88277	7.0182	5.89717	14.2761	6	8	7	11	1.82235e-13	5.70892e-09	5.60726e-11	0.000899618
10	21725000	21730000	10	21760000	21765000	.	.	.	.	0,0,0	26	7.82978	12.6839	7.75073	4.89158	8	11	8	6	1.93359e-05	0.0339882	8.40075e-05	1.74717e-07
10	21755000	21760000	10	22520000	22525000	.	.	.	.	0,0,0	11	1.72626	1.90677	2.03162	2.13124	2	2	3	3	0.0128071	0.0253787	0.0538051	0.0568751
10	22155000	22160000	10	22205000	22210000	.	.	.	.	0,0,0	14	4.67929	4.40371	3.76671	4.29585	6	6	5	6	0.0228825	0.0356873	0.0211163	0.0587062
10	22500000	22505000	10	23080000	23085000	.	.	.	.	0,0,0	12	2.45157	2.015	2.72676	1.83409	3	3	4	2	0.00902681	0.0201631	0.0483231	0.00774442
10	22500000	22505000	10	23450000	23455000	.	.	.	.	0,0,0	13	2.10259	2.22864	3.2552	3.55447	3	3	5	5	0.00279279	0.00654614	0.0486373	0.0522406
10	22645000	22650000	10	22700000	22705000	.	.	.	.	0,0,0	15	3.68226	4.60614	5.08326	5.592	5	6	7	7	0.00346019	0.0174153	0.0779212	0.0788116
10	22860000	22865000	10	22895000	22900000	.	.	.	.	0,0,0	17	3.11006	7.41229	5.16333	6.3397	4	8	7	8	7.70591e-05	0.0372598	0.0209371	0.0701872
10	23590000	23595000	10	23660000	23665000	.	.	.	.	0,0,0	31	15.0712	13.6797	16.3564	17.3786	11	11	12	12	0.00210759	0.00256187	0.0549939	0.0597068
10	23605000	23610000	10	23645000	23650000	.	.	.	.	0,0,0	15	3.7603	4.31626	3.5006	6.08174	5	6	5	7	0.00346019	0.0174153	0.00832192	0.0788116
10	23605000	23610000	10	23660000	23665000	.	.	.	.	0,0,0	27	10.2542	10.8934	14.4601	10.6262	10	10	11	10	0.00183564	0.00243569	0.0474394	0.00579741
10	23660000	23665000	10	23810000	23815000	.	.	.	.	0,0,0	17	4.80482	6.11075	6.8873	6.5041	6	7	8	8	0.00197485	0.0124709	0.0725713	0.0701872
10	25900000	25905000	10	26075000	26080000	.	.	.	.	0,0,0	17	4.10388	5.5725	6.08267	6.4943	6	7	7	8	0.00197485	0.0124709	0.0209371	0.0701872
10	23765000	23770000	10	23810000	23815000	.	.	.	.	0,0,0	22	9.49576	10.254	11.7456	10.7959	9	10	10	10	0.0054492	0.0377448	0.0787497	0.0805399
10	25625000	25630000	10	25795000	25800000	.	.	.	.	0,0,0	15	3.57486	3.30604	4.58916	4.00212	5	5	6	6	0.00346019	0.00690573	0.0275802	0.0288497
10	26075000	26080000	10	26435000	26440000	.	.	.	.	0,0,0	17	5.33711	5.28922	5.33139	6.36933	7	7	7	8	0.00735115	0.0124709	0.0209371	0.0701872
10	26215000	26220000	10	26280000	26285000	.	.	.	.	0,0,0	14	3.60485	4.62095	4.70106	3.81774	5	6	6	5	0.00871876	0.0356873	0.0591247	0.0239566
10	26265000	26270000	10	26315000	26320000	.	.	.	.	0,0,0	15	3.9354	4.93819	4.17478	6.0062	5	6	6	7	0.00346019	0.0174153	0.0275802	0.0788116
10	26280000	26285000	10	26315000	26320000	.	.	.	.	0,0,0	36	12.2115	13.652	11.4359	17.8378	10	11	10	12	1.27911e-06	0.000102075	4.82889e-06	0.00648461
10	26320000	26325000	10	26435000	26440000	.	.	.	.	0,0,0	18	4.31956	5.97619	5.62287	6.80128	6	7	7	8	0.000711911	0.00597717	0.00955531	0.0395652
10	27130000	27135000	10	27225000	27230000	.	.	.	.	0,0,0	22	6.38116	6.5338	8.42874	7.56334	8	8	9	8	0.000735879	0.00131262	0.0153007	0.00247951
10	27130000	27135000	10	27320000	27325000	.	.	.	.	0,0,0	26	8.39551	9.56732	12.8035	9.2238	9	9	11	9	0.000299597	0.00045167	0.0708907	0.000948172
10	27135000	27140000	10	27185000	27190000	.	.	.	.	0,0,0	41	11.6284	11.8764	14.2366	9.90459	10	10	11	10	8.66655e-09	1.92826e-08	4.58324e-06	4.02115e-08
10	27135000	27140000	10	27220000	27225000	.	.	.	.	0,0,0	39	9.19216	9.99999	17.1582	10.3955	9	10	12	10	4.59177e-10	1.34465e-07	0.00104077	3.09047e-07
10	27135000	27140000	10	27225000	27230000	.	.	.	.	0,0,0	39	9.90058	10.7041	16.3597	11.3039	10	10	12	10	7.0096e-08	1.34465e-07	0.00104077	3.09047e-07
10	27135000	27140000	10	27320000	27325000	.	.	.	.	0,0,0	53	13.1054	15.494	20.0162	12.5053	11	11	13	11	7.09913e-12	1.38916e-11	1.22597e-05	3.50675e-11
10	27185000	27190000	10	27225000	27230000	.	.	.	.	0,0,0	29	10.956	10.3961	11.7758	7.54636	10	10	10	8	0.000436949	0.000631809	0.00133429	2.93172e-06
10	27185000	27190000	10	27320000	27325000	.	.	.	.	0,0,0	23	8.77533	9.80273	8.78004	10.7502	9	9	9	10	0.00280214	0.00412107	0.00841452	0.051787
10	27225000	27230000	10	27320000	27325000	.	.	.	.	0,0,0	31	8.14633	10.4859	15.4951	11.7261	9	10	11	10	3.29237e-06	0.000147501	0.00590373	0.000368122
10	29280000	29285000	10	29505000	29510000	.	.	.	.	0,0,0	30	15.2417	13.1321	13.1606	17.1048	11	11	11	12	0.00383566	0.00450241	0.0103142	0.0855084
10	29280000	29285000	10	29590000	29595000	.	.	.	.	0,0,0	17	5.73705	6.3435	7.61569	7.08067	7	8	8	8	0.00735115	0.0372598	0.0725713	0.0701872
10	29290000	29295000	10	29330000	29335000	.	.	.	.	0,0,0	20	7.70228	7.47486	7.40169	6.61109	8	8	8	8	0.00365306	0.00552989	0.0117797	0.010513
10	29290000	29295000	10	29525000	29530000	.	.	.	.	0,0,0	15	6.10177	4.70191	5.68124	5.04915	7	6	7	7	0.0291065	0.0174153	0.0779212	0.0788116
10	29335000	29340000	10	29370000	29375000	.	.	.	.	0,0,0	21	3.51614	10.7249	5.08164	9.09229	5	10	7	9	2.62742e-06	0.0599944	0.000729734	0.029154
10	29335000	29340000	10	29480000	29485000	.	.	.	.	0,0,0	30	8.0821	10.6405	14.3586	13.6162	9	10	11	11	8.73644e-06	0.000301853	0.0103142	0.0103054
10	29335000	29340000	10	29505000	29510000	.	.	.	.	0,0,0	30	11.0419	10.7658	13.1795	13.2794	10	10	11	11	0.000210039	0.000301853	0.0103142	0.0103054
10	29335000	29340000	10	29585000	29590000	.	.	.	.	0,0,0	25	8.61893	7.8971	8.46565	9.49109	9	9	9	9	0.000657915	0.000982892	0.00214828	0.00202776
10	29465000	29470000	10	29505000	29510000	.	.	.	.	0,0,0	23	8.94555	8.90535	5.663	10.6752	9	9	7	10	0.00280214	0.00412107	0.000100436	0.051787
10	29505000	29510000	10	29540000	29545000	.	.	.	.	0,0,0	33	7.58946	16.0106	9.1491	8.88018	8	12	9	9	8.53328e-09	0.011366	2.09885e-06	1.79733e-06
10	29520000	29525000	10	29580000	29585000	.	.	.	.	0,0,0	26	7.71057	8.41735	8.54481	10.7311	8	9	9	10	1.93359e-05	0.00045167	0.00104429	0.0106321
10	29520000	29525000	10	29585000	29590000	.	.	.	.	0,0,0	50	11.5961	12.0471	12.066	21.4404	10	10	10	13	2.31305e-13	4.98194e-13	7.19786e-13	8.79529e-05
10	29525000	29530000	10	29595000	29600000	.	.	.	.	0,0,0	20	6.46525	6.33048	6.78303	9.12271	8	8	8	9	0.00365306	0.00552989	0.0117797	0.0503354
10	29530000	29535000	10	29585000	29590000	.	.	.	.	0,0,0	37	11.5194	13.5686	12.6993	14.9393	10	11	11	11	4.93615e-07	4.69472e-05	0.000112298	0.000110166
10	29540000	29545000	10	29575000	29580000	.	.	.	.	0,0,0	18	3.2309	7.71515	6.68797	5.57181	5	8	8	7	0.000129896	0.020608	0.0405628	0.010062
10	29550000	29555000	10	29585000	29590000	.	.	.	.	0,0,0	24	5.55015	9.69424	10.2048	6.91407	7	9	10	8	1.10059e-05	0.00206957	0.0294512	0.000447412
10	32635000	32640000	10	32675000	32680000	.	.	.	.	0,0,0	26	10.0729	12.0279	11.8937	14.2766	10	10	10	11	0.00350961	0.00450532	0.0097313	0.0691806
10	32635000	32640000	10	32710000	32715000	.	.	.	.	0,0,0	31	13.4436	12.0536	17.5068	15.4326	11	10	12	11	0.00210759	0.000147501	0.0549939	0.00594302
10	32640000	32645000	10	32680000	32685000	.	.	.	.	0,0,0	21	8.13242	7.74405	8.17913	7.49979	9	8	9	8	0.0104689	0.00266206	0.0277717	0.00508086
10	32675000	32680000	10	32710000	32715000	.	.	.	.	0,0,0	23	6.18749	11.9614	5.37957	9.82137	7	10	7	9	3.42638e-05	0.0232949	0.000100436	0.0085689
10	35410000	35415000	10	35455000	35460000	.	.	.	.	0,0,0	21	5.84206	8.11266	8.28969	6.83803	7	9	9	8	0.000236683	0.0139646	0.0277717	0.00508086
10	35410000	35415000	10	35625000	35630000	.	.	.	.	0,0,0	24	8.64282	8.30077	9.5037	7.23516	9	9	9	8	0.00139856	0.00206957	0.00452125	0.000447412
10	35410000	35415000	10	36180000	36185000	.	.	.	.	0,0,0	17	1.79016	2.3577	2.07337	4.26328	2	3	3	6	1.19063e-06	2.89054e-05	2.99291e-05	0.00571705
10	37950000	37955000	10	38115000	38120000	.	.	.	.	0,0,0	22	5.62383	7.16326	5.44322	5.79565	7	8	7	7	9.34461e-05	0.00131262	0.0002794	0.000261144
10	38295000	38300000	10	38360000	38365000	.	.	.	.	0,0,0	15	4.37642	3.84238	4.4504	5.33791	6	5	6	7	0.0107279	0.00690573	0.0275802	0.0788116
10	40950000	40955000	10	41090000	41095000	.	.	.	.	0,0,0	15	2.09431	2.08025	2.06668	2.05608	3	3	3	3	0.00020407	0.000561407	0.000626702	0.000640135
10	43015000	43020000	10	43260000	43265000	.	.	.	.	0,0,0	14	3.5134	3.19873	3.94721	3.21481	5	5	6	5	0.00871876	0.0163433	0.0591247	0.0239566
10	43510000	43515000	10	43685000	43690000	.	.	.	.	0,0,0	13	1.94875	2.80404	3.5594	3.39812	2	4	5	5	0.000990835	0.0159952	0.0486373	0.0522406
10	43570000	43575000	10	43685000	43690000	.	.	.	.	0,0,0	16	3.10663	3.12061	3.26131	3.59587	4	4	5	5	0.000268037	0.000542519	0.00314124	0.0035613
10	44715000	44720000	10	44750000	44755000	.	.	.	.	0,0,0	21	6.44874	8.39451	7.26058	9.09938	8	9	8	9	0.00167172	0.0139646	0.00581603	0.029154
10	48090000	48095000	10	48175000	48180000	.	.	.	.	0,0,0	16	6.02916	5.00892	4.31955	5.94998	7	7	6	7	0.0151448	0.0236047	0.0124265	0.0437082
10	48100000	48105000	10	48165000	48170000	.	.	.	.	0,0,0	35	9.50514	10.0462	14.7052	13.1666	9	10	11	11	5.13126e-08	5.73657e-06	0.000461986	0.000480434
10	48100000	48105000	10	48170000	48175000	.	.	.	.	0,0,0	36	12.7211	11.424	13.4967	12.0489	11	10	11	10	7.05814e-05	2.37673e-06	0.000238407	5.64738e-06
10	48100000	48105000	10	48175000	48180000	.	.	.	.	0,0,0	29	10.5897	10.6746	14.6014	11.1062	10	10	11	10	0.000436949	0.000631809	0.0173458	0.00154329
10	48105000	48110000	10	48175000	48180000	.	.	.	.	0,0,0	23	6.83042	7.64796	11.6159	8.1373	8	8	10	9	0.000326575	0.000599721	0.0495526	0.0085689
10	48105000	48110000	10	48275000	48280000	.	.	.	.	0,0,0	13	2.94807	2.76073	3.50726	2.53459	4	4	5	4	0.00846838	0.0159952	0.0486373	0.0198157
10	49535000	49540000	10	49775000	49780000	.	.	.	.	0,0,0	17	1.69137	1.6647	2.97972	2.53587	2	2	4	4	1.19063e-06	2.21395e-06	0.000176244	0.000174104
10	51150000	51155000	10	51215000	51220000	.	.	.	.	0,0,0	23	8.49862	7.81985	9.56536	8.49267	9	8	9	9	0.00280214	0.000599721	0.00841452	0.0085689
10	51150000	51155000	10	51230000	51235000	.	.	.	.	0,0,0	36	12.1729	10.2118	12.9308	11.1399	10	10	11	10	1.27911e-06	2.37673e-06	0.000238407	5.64738e-06
10	51150000	51155000	10	51295000	51300000	.	.	.	.	0,0,0	16	5.30411	4.58418	5.46141	5.97833	7	6	7	7	0.0151448	0.00815994	0.0419077	0.0437082
10	51150000	51155000	10	51645000	51650000	.	.	.	.	0,0,0	19	6.64864	6.15454	6.09069	3.81425	8	7	7	5	0.00762887	0.0027782	0.00440181	0.000117658
10	51225000	51230000	10	51275000	51280000	.	.	.	.	0,0,0	19	3.37033	4.35343	6.29492	4.90195	5	6	8	6	3.76889e-05	0.000566444	0.0225188	0.000789944
10	51845000	51850000	10	51880000	51885000	.	.	.	.	0,0,0	19	5.21346	9.5093	7.01818	5.97984	7	9	8	7	0.00143139	0.0407966	0.0225188	0.00453518
10	51845000	51850000	10	51885000	51890000	.	.	.	.	0,0,0	27	7.60632	8.85335	11.7776	11.9046	8	9	10	10	6.8662e-06	0.000208112	0.00512333	0.00579741
10	51845000	51850000	10	51940000	51945000	.	.	.	.	0,0,0	26	7.42798	8.47759	9.89188	8.41914	8	9	10	9	1.93359e-05	0.00045167	0.0097313	0.000948172
10	56395000	56400000	10	56460000	56465000	.	.	.	.	0,0,0	15	3.61154	5.40307	5.69741	4.88747	5	7	7	6	0.00346019	0.0443084	0.0779212	0.0288497
10	56555000	56560000	10	56595000	56600000	.	.	.	.	0,0,0	34	10.6983	12.8154	15.3834	18.7157	10	11	11	12	7.72474e-06	0.000391567	0.000880541	0.0168279
10	56560000	56565000	10	56595000	56600000	.	.	.	.	0,0,0	35	10.6824	12.5583	12.1043	17.872	10	11	10	12	3.24305e-06	0.000207326	1.20937e-05	0.0106003
10	56565000	56570000	10	56625000	56630000	.	.	.	.	0,0,0	15	4.39202	5.56691	5.14317	4.86827	6	7	7	6	0.0107279	0.0443084	0.0779212	0.0288497
10	56565000	56570000	10	56630000	56635000	.	.	.	.	0,0,0	15	4.17518	5.25223	5.60849	4.9649	6	7	7	7	0.0107279	0.0443084	0.0779212	0.0788116
10	56595000	56600000	10	56630000	56635000	.	.	.	.	0,0,0	22	3.64631	12.2599	6.861	7.16157	5	10	8	8	5.97413e-07	0.0377448	0.00271474	0.00247951
10	56565000	56570000	10	57045000	57050000	.	.	.	.	0,0,0	12	3.14779	3.41033	3.43387	2.49879	5	5	5	4	0.0434891	0.0690511	0.0986332	0.0489862
10	56595000	56600000	10	56905000	56910000	.	.	.	.	0,0,0	18	2.79081	4.09252	4.66355	4.39369	4	6	6	6	1.92072e-05	0.00136262	0.00223808	0.00212992
10	56595000	56600000	10	57180000	57185000	.	.	.	.	0,0,0	23	10.3439	9.85467	8.27959	10.31	10	10	9	10	0.0210034	0.0232949	0.00841452	0.051787
10	56935000	56940000	10	56985000	56990000	.	.	.	.	0,0,0	26	8.71602	9.74705	10.2751	12.3454	9	9	10	10	0.000299597	0.00045167	0.0097313	0.0106321
10	56935000	56940000	10	57045000	57050000	.	.	.	.	0,0,0	22	7.48016	9.14275	6.05656	11.8495	8	9	7	10	0.000735879	0.00767982	0.0002794	0.0805399
10	56945000	56950000	10	56985000	56990000	.	.	.	.	0,0,0	31	14.8114	15.0796	13.8675	13.0937	11	11	11	11	0.00210759	0.00256187	0.00590373	0.00594302
10	56945000	56950000	10	57045000	57050000	.	.	.	.	0,0,0	20	7.90928	9.19303	9.23627	8.48133	9	9	9	9	0.0189875	0.0239339	0.0479493	0.0503354
10	56945000	56950000	10	57070000	57075000	.	.	.	.	0,0,0	14	3.19286	4.17197	4.94093	4.13487	5	6	6	6	0.00871876	0.0356873	0.0591247	0.0587062
10	57180000	57185000	10	57235000	57240000	.	.	.	.	0,0,0	14	4.5152	4.11107	4.82276	3.9524	6	6	6	6	0.0228825	0.0356873	0.0591247	0.0587062
10	57185000	57190000	10	57240000	57245000	.	.	.	.	0,0,0	20	4.04387	4.97144	6.16031	2.40031	6	7	7	3	8.77235e-05	0.00125312	0.00186628	3.14939e-07
10	57440000	57445000	10	57665000	57670000	.	.	.	.	0,0,0	22	4.01692	4.5128	8.21158	5.80853	6	6	9	7	8.79751e-06	1.75017e-05	0.0153007	0.000261144
10	57665000	57670000	10	57700000	57705000	.	.	.	.	0,0,0	14	1.53303	3.19248	4.2167	3.30218	1	5	6	5	4.42753e-05	0.0163433	0.0591247	0.0239566
10	57665000	57670000	10	57775000	57780000	.	.	.	.	0,0,0	28	7.08484	7.50934	8.94419	10.4885	8	8	9	10	2.43993e-06	5.47935e-06	0.00021104	0.00303266
10	57665000	57670000	10	57780000	57785000	.	.	.	.	0,0,0	26	7.11772	8.64211	9.82668	11.7894	8	9	9	10	1.93359e-05	0.00045167	0.00104429	0.0106321
10	57675000	57680000	10	57780000	57785000	.	.	.	.	0,0,0	18	4.15445	4.58624	5.49306	5.59892	6	6	7	7	0.000711911	0.00136262	0.00955531	0.010062
10	57775000	57780000	10	57835000	57840000	.	.	.	.	0,0,0	22	6.43069	7.31693	8.51562	8.36336	8	8	9	9	0.000735879	0.00131262	0.0153007	0.0160889
10	57780000	57785000	10	57835000	57840000	.	.	.	.	0,0,0	20	4.88816	6.91279	9.25819	7.15513	6	8	9	8	8.77235e-05	0.00552989	0.0479493	0.010513
10	57780000	57785000	10	57855000	57860000	.	.	.	.	0,0,0	23	8.58587	8.64778	11.4952	10.4188	9	9	10	10	0.00280214	0.00412107	0.0495526	0.051787
10	57790000	57795000	10	57825000	57830000	.	.	.	.	0,0,0	20	5.06118	6.99196	7.72527	5.84961	7	8	8	7	0.000595801	0.00552989	0.0117797	0.00181023
10	59260000	59265000	10	59365000	59370000	.	.	.	.	0,0,0	19	8.84819	9.0729	9.18858	8.48984	9	9	9	9	0.033828	0.0407966	0.0811282	0.0835667
10	59265000	59270000	10	59365000	59370000	.	.	.	.	0,0,0	23	6.58438	7.96413	8.59745	8.86272	8	9	9	9	0.000326575	0.00412107	0.00841452	0.0085689
10	59370000	59375000	10	59455000	59460000	.	.	.	.	0,0,0	17	4.4682	5.08081	5.50251	5.37371	6	7	7	7	0.00197485	0.0124709	0.0209371	0.0222102
10	59830000	59835000	10	60215000	60220000	.	.	.	.	0,0,0	16	4.33855	4.14315	5.14862	3.71567	6	6	7	5	0.00461177	0.00815994	0.0419077	0.0035613
10	59890000	59895000	10	60215000	60220000	.	.	.	.	0,0,0	17	6.22428	6.26636	6.46519	7.73851	7	8	8	8	0.00735115	0.0372598	0.0725713	0.0701872
10	59990000	59995000	10	60195000	60200000	.	.	.	.	0,0,0	24	8.25001	6.95409	6.88134	8.86201	9	8	8	9	0.00139856	0.000255271	0.000526658	0.00427756
10	59990000	59995000	10	60215000	60220000	.	.	.	.	0,0,0	26	15.1508	11.6236	12.7639	12.0066	11	10	11	10	0.0322498	0.00450532	0.0708907	0.0106321
10	60000000	60005000	10	60180000	60185000	.	.	.	.	0,0,0	19	5.06625	4.92032	6.3344	3.9102	7	6	8	5	0.00143139	0.000566444	0.0225188	0.000117658
10	60000000	60005000	10	60205000	60210000	.	.	.	.	0,0,0	22	5.668	4.41013	5.75655	5.86042	7	6	7	7	9.34461e-05	1.75017e-05	0.0002794	0.000261144
10	60175000	60180000	10	60215000	60220000	.	.	.	.	0,0,0	21	5.58472	9.43378	9.50022	9.59879	7	9	9	9	0.000236683	0.0139646	0.0277717	0.029154
10	60180000	60185000	10	60215000	60220000	.	.	.	.	0,0,0	29	2.55684	8.36986	9.94737	9.54815	4	9	10	9	1.19985e-13	3.74098e-05	0.00133429	7.83373e-05
10	60215000	60220000	10	60285000	60290000	.	.	.	.	0,0,0	28	12.795	11.5555	14.5531	15.3914	11	10	11	11	0.0118725	0.00124135	0.0287076	0.0287996
10	60215000	60220000	10	60375000	60380000	.	.	.	.	0,0,0	22	11.0239	9.13836	11.3082	11.9304	10	9	10	10	0.0353406	0.00767982	0.0787497	0.0805399
10	60285000	60290000	10	60365000	60370000	.	.	.	.	0,0,0	32	9.09145	10.8037	14.9309	14.7434	9	10	11	11	1.24884e-06	7.03013e-05	0.00327101	0.00336471
10	60285000	60290000	10	60420000	60425000	.	.	.	.	0,0,0	15	4.60425	5.16572	5.74103	5.37751	6	7	7	7	0.0107279	0.0443084	0.0779212	0.0788116
10	65310000	65315000	10	65420000	65425000	.	.	.	.	0,0,0	19	7.96532	8.03288	9.67944	8.76473	9	9	9	9	0.033828	0.0407966	0.0811282	0.0835667
10	65420000	65425000	10	65460000	65465000	.	.	.	.	0,0,0	39	10.2787	12.3526	19.0692	19.87	10	10	12	13	7.0096e-08	1.34465e-07	0.00104077	0.0253346
10	65680000	65685000	10	65750000	65755000	.	.	.	.	0,0,0	14	4.47798	5.04544	3.94856	4.52836	6	7	6	6	0.0228825	0.0783645	0.0591247	0.0587062
10	65680000	65685000	10	65755000	65760000	.	.	.	.	0,0,0	16	5.5747	5.27539	4.38868	4.58082	7	7	6	6	0.0151448	0.0236047	0.0124265	0.0132102
10	65995000	66000000	10	66040000	66045000	.	.	.	.	0,0,0	17	5.60593	5.84913	7.50003	3.62594	7	7	8	5	0.00735115	0.0124709	0.0725713	0.00138412
10	66275000	66280000	10	66440000	66445000	.	.	.	.	0,0,0	22	4.17748	5.91149	4.67905	9.89296	6	7	6	10	8.79751e-06	0.000186378	2.64616e-05	0.0805399
10	66275000	66280000	10	66640000	66645000	.	.	.	.	0,0,0	24	7.45226	7.41744	6.15623	8.54382	8	8	7	9	0.000133047	0.000255271	3.42544e-05	0.00427756
10	66440000	66445000	10	66640000	66645000	.	.	.	.	0,0,0	30	10.2137	9.55098	11.5709	8.4573	10	9	10	9	0.000210039	1.58798e-05	0.000638216	3.14116e-05
10	66585000	66590000	10	66640000	66645000	.	.	.	.	0,0,0	21	9.11345	7.27076	4.07914	9.11222	9	8	6	9	0.0104689	0.00266206	8.29506e-05	0.029154
10	66640000	66645000	10	66890000	66895000	.	.	.	.	0,0,0	15	5.38278	4.83418	3.44703	3.66597	7	6	5	5	0.0291065	0.0174153	0.00832192	0.00963794
10	66640000	66645000	10	66900000	66905000	.	.	.	.	0,0,0	16	6.6803	6.01318	5.31639	4.02678	8	7	7	6	0.0509687	0.0236047	0.0419077	0.0132102
10	66640000	66645000	10	66910000	66915000	.	.	.	.	0,0,0	18	7.17461	6.502	6.53649	3.15985	8	8	8	5	0.0149558	0.020608	0.0405628	0.000390363
10	66810000	66815000	10	66890000	66895000	.	.	.	.	0,0,0	24	7.3502	7.82698	10.0822	11.0427	8	8	10	10	0.000133047	0.000255271	0.0294512	0.0318924
10	66810000	66815000	10	66900000	66905000	.	.	.	.	0,0,0	27	6.98768	7.79902	9.56992	9.22887	8	8	9	9	6.8662e-06	1.53397e-05	0.00049474	0.000441327
10	66910000	66915000	10	66955000	66960000	.	.	.	.	0,0,0	18	7.79227	6.79509	4.65218	6.62232	8	8	6	8	0.0149558	0.020608	0.00223808	0.0395652
10	67130000	67135000	10	67170000	67175000	.	.	.	.	0,0,0	24	6.77393	7.29938	10.7681	8.15842	8	8	10	9	0.000133047	0.000255271	0.0294512	0.00427756
10	67130000	67135000	10	67305000	67310000	.	.	.	.	0,0,0	14	3.33945	3.75066	4.68607	4.20621	5	5	6	6	0.00871876	0.0163433	0.0591247	0.0587062
10	68750000	68755000	10	68785000	68790000	.	.	.	.	0,0,0	20	3.52087	3.99703	4.41417	6.40405	5	6	6	8	9.25108e-06	0.000185581	0.000276454	0.010513
10	68785000	68790000	10	68870000	68875000	.	.	.	.	0,0,0	21	3.51691	4.42896	4.09367	7.51312	5	6	6	8	2.62742e-06	5.8423e-05	8.29506e-05	0.00508086
10	68785000	68790000	10	68915000	68920000	.	.	.	.	0,0,0	11	1.45438	1.81858	1.90728	2.28971	1	2	2	3	0.0056938	0.0253787	0.0244088	0.0568751
10	74395000	74400000	10	74430000	74435000	.	.	.	.	0,0,0	23	7.57635	10.3747	10.0617	7.08938	8	10	10	8	0.000326575	0.0232949	0.0495526	0.00108839
10	74395000	74400000	10	74740000	74745000	.	.	.	.	0,0,0	13	2.98249	2.65792	3.94039	2.7257	4	4	5	4	0.00846838	0.0159952	0.0486373	0.0198157
10	74540000	74545000	10	74645000	74650000	.	.	.	.	0,0,0	19	6.20197	7.24084	8.19093	8.66936	7	8	9	9	0.00143139	0.0110845	0.0811282	0.0835667
10	74645000	74650000	10	74740000	74745000	.	.	.	.	0,0,0	29	9.32437	11.0985	12.7214	14.4053	9	10	11	11	2.20184e-05	0.000631809	0.0173458	0.0178204
10	74650000	74655000	10	74740000	74745000	.	.	.	.	0,0,0	18	4.52824	4.98416	4.96029	5.77629	6	7	7	7	0.000711911	0.00597717	0.00955531	0.010062
10	76215000	76220000	10	76320000	76325000	.	.	.	.	0,0,0	16	5.72838	5.36205	5.94867	5.26208	7	7	7	7	0.0151448	0.0236047	0.0419077	0.0437082
10	76225000	76230000	10	76570000	76575000	.	.	.	.	0,0,0	14	3.22735	3.20802	4.1956	2.94754	5	5	6	4	0.00871876	0.0163433	0.0591247	0.00726851
10	76320000	76325000	10	76495000	76500000	.	.	.	.	0,0,0	26	3.95174	7.41636	10.5456	8.78481	6	8	10	9	6.52362e-08	4.27594e-05	0.0097313	0.000948172
10	76410000	76415000	10	76445000	76450000	.	.	.	.	0,0,0	12	1.72822	2.51326	2.17681	2.4263	2	4	3	3	0.00370862	0.0353788	0.0224015	0.0224049
10	76495000	76500000	10	76560000	76565000	.	.	.	.	0,0,0	32	9.94299	10.8914	12.5784	12.0819	10	10	11	10	4.35595e-05	7.03013e-05	0.00327101	0.000178515
10	76525000	76530000	10	76560000	76565000	.	.	.	.	0,0,0	16	3.62147	5.63038	5.07346	3.23071	5	7	7	5	0.00124328	0.0236047	0.0419077	0.0035613
10	76530000	76535000	10	76570000	76575000	.	.	.	.	0,0,0	21	2.64516	4.63787	4.97332	5.57117	4	6	7	7	2.52085e-07	5.8423e-05	0.000729734	0.000745968
10	76585000	76590000	10	76665000	76670000	.	.	.	.	0,0,0	13	2.77882	2.62991	3.04881	1.99774	4	4	4	3	0.00846838	0.0159952	0.0195784	0.00750925
10	77145000	77150000	10	77200000	77205000	.	.	.	.	0,0,0	17	4.99271	5.18754	4.55336	5.87929	7	7	6	7	0.00735115	0.0124709	0.00586356	0.0222102
10	77200000	77205000	10	77245000	77250000	.	.	.	.	0,0,0	31	13.2692	13.2778	16.4493	12.7674	11	11	12	11	0.00210759	0.00256187	0.0549939	0.00594302
10	79220000	79225000	10	79430000	79435000	.	.	.	.	0,0,0	22	7.69424	6.6154	7.47382	8.18424	8	8	8	9	0.000735879	0.00131262	0.00271474	0.0160889
10	79220000	79225000	10	79480000	79485000	.	.	.	.	0,0,0	15	6.00265	4.46351	5.84077	4.45525	7	6	7	6	0.0291065	0.0174153	0.0779212	0.0288497
10	79220000	79225000	10	79845000	79850000	.	.	.	.	0,0,0	14	4.80471	3.6667	3.48534	2.95852	6	5	5	4	0.0228825	0.0163433	0.0211163	0.00726851
10	79225000	79230000	10	79430000	79435000	.	.	.	.	0,0,0	17	5.357	4.50797	5.95771	5.02676	7	6	7	7	0.00735115	0.00372722	0.0209371	0.0222102
10	79250000	79255000	10	79425000	79430000	.	.	.	.	0,0,0	17	5.21118	5.9391	7.27587	6.69266	7	7	8	8	0.00735115	0.0124709	0.0725713	0.0701872
10	79250000	79255000	10	79465000	79470000	.	.	.	.	0,0,0	24	9.62796	10.7945	11.3449	7.3175	9	10	10	8	0.00139856	0.0139666	0.0294512	0.000447412
10	79250000	79255000	10	79845000	79850000	.	.	.	.	0,0,0	14	3.82469	3.90382	4.68022	3.242	5	5	6	5	0.00871876	0.0163433	0.0591247	0.0239566
10	79250000	79255000	10	79970000	79975000	.	.	.	.	0,0,0	19	2.26362	2.10324	1.90549	1.99847	3	3	2	3	3.6129e-07	1.50934e-06	6.81899e-08	1.5728e-06
10	79430000	79435000	10	79560000	79565000	.	.	.	.	0,0,0	17	5.77147	5.21978	6.74612	6.09709	7	7	8	7	0.00735115	0.0124709	0.0725713	0.0222102
10	79560000	79565000	10	79600000	79605000	.	.	.	.	0,0,0	19	6.25286	5.98827	7.62658	6.67863	8	7	8	8	0.00762887	0.0027782	0.0225188	0.0214388
10	79560000	79565000	10	79620000	79625000	.	.	.	.	0,0,0	13	4.22054	4.65021	3.73407	3.48524	6	6	5	5	0.0452055	0.0652956	0.0486373	0.0522406
10	79580000	79585000	10	79845000	79850000	.	.	.	.	0,0,0	15	2.81889	3.13769	2.89039	3.65728	4	4	4	5	0.000962873	0.00185495	0.00238489	0.00963794
10	79685000	79690000	10	79745000	79750000	.	.	.	.	0,0,0	14	3.83187	3.74474	2.75639	4.50567	5	5	4	6	0.00871876	0.0163433	0.00793464	0.0587062
10	79685000	79690000	10	79845000	79850000	.	.	.	.	0,0,0	27	8.98103	7.75071	13.6547	9.85377	9	8	11	10	0.000132942	1.53397e-05	0.0474394	0.00579741
10	79685000	79690000	10	79970000	79975000	.	.	.	.	0,0,0	18	4.83236	3.16243	3.89218	2.82985	6	5	5	4	0.000711911	0.00032402	0.000344693	4.48753e-05
10	79800000	79805000	10	79855000	79860000	.	.	.	.	0,0,0	14	2.82464	2.74981	3.62989	3.15996	4	4	5	5	0.00312035	0.00587831	0.0211163	0.0239566
10	79800000	79805000	10	79970000	79975000	.	.	.	.	0,0,0	19	3.96206	5.48726	6.55592	8.17076	6	7	8	9	0.000269132	0.0027782	0.0225188	0.0835667
10	79820000	79825000	10	79970000	79975000	.	.	.	.	0,0,0	24	5.76716	6.78835	6.72574	11.336	7	8	8	10	1.10059e-05	0.000255271	0.000526658	0.0318924
10	79845000	79850000	10	79970000	79975000	.	.	.	.	0,0,0	56	14.4653	13.4029	7.35823	28.8609	11	11	8	14	2.35893e-13	5.35813e-13	1.22594e-24	0.000351157
10	79845000	79850000	10	80495000	80500000	.	.	.	.	0,0,0	15	2.34066	3.14658	5.07281	2.54723	3	5	7	4	0.00020407	0.00690573	0.0779212	0.00248769
10	80330000	80335000	10	80400000	80405000	.	.	.	.	0,0,0	18	5.6689	5.29709	5.85655	7.68773	7	7	7	8	0.00326602	0.00597717	0.00955531	0.0395652
10	80330000	80335000	10	80440000	80445000	.	.	.	.	0,0,0	17	4.85151	4.34613	6.52017	3.76071	6	6	8	5	0.00197485	0.00372722	0.0725713	0.00138412
10	80330000	80335000	10	80495000	80500000	.	.	.	.	0,0,0	21	5.69839	3.86486	8.17434	5.67154	7	5	9	7	0.000236683	6.43377e-06	0.0277717	0.000745968
10	80330000	80335000	10	80560000	80565000	.	.	.	.	0,0,0	18	3.37907	3.75661	5.44662	4.01601	5	5	7	6	0.000129896	0.00032402	0.00955531	0.00212992
10	80400000	80405000	10	80495000	80500000	.	.	.	.	0,0,0	28	14.1133	11.7179	11.4687	14.929	11	10	10	11	0.0118725	0.00124135	0.00269227	0.0287996
10	80425000	80430000	10	80495000	80500000	.	.	.	.	0,0,0	27	10.9393	11.8511	14.3296	11.7104	10	10	11	10	0.00183564	0.00243569	0.0474394	0.00579741
10	80425000	80430000	10	80560000	80565000	.	.	.	.	0,0,0	17	6.56602	6.34881	5.95101	7.82913	8	8	7	8	0.0279685	0.0372598	0.0209371	0.0701872
10	80440000	80445000	10	80690000	80695000	.	.	.	.	0,0,0	18	4.68741	4.33453	4.00434	7.64798	6	6	6	8	0.000711911	0.00136262	0.00223808	0.0395652
10	80470000	80475000	10	80505000	80510000	.	.	.	.	0,0,0	39	8.29095	20.0542	13.9449	13.7408	9	13	11	11	4.59177e-10	0.012357	2.37995e-05	2.46565e-05
10	80495000	80500000	10	80560000	80565000	.	.	.	.	0,0,0	48	13.9729	16.3138	13.7485	19.9168	11	12	11	13	1.53172e-09	7.25118e-07	7.22219e-09	0.000304048
10	80495000	80500000	10	80690000	80695000	.	.	.	.	0,0,0	22	5.11335	5.9896	8.19058	10.0722	7	7	9	10	9.34461e-05	0.000186378	0.0153007	0.0805399
10	80505000	80510000	10	80560000	80565000	.	.	.	.	0,0,0	75	18.509	17.8786	23.6845	16.3769	12	12	13	12	2.60237e-19	5.10869e-19	8.80429e-14	1.03213e-18
10	81925000	81930000	10	82010000	82015000	.	.	.	.	0,0,0	15	4.36735	4.64271	4.5376	4.9221	6	6	6	6	0.0107279	0.0174153	0.0275802	0.0288497
10	82230000	82235000	10	82335000	82340000	.	.	.	.	0,0,0	21	6.18146	6.86242	3.81681	7.10475	7	8	5	8	0.000236683	0.00266206	7.69857e-06	0.00508086
10	82235000	82240000	10	82335000	82340000	.	.	.	.	0,0,0	31	8.15793	9.3704	7.75813	11.1157	9	9	8	10	3.29237e-06	6.09248e-06	3.46725e-07	0.000368122
10	83845000	83850000	10	84265000	84270000	.	.	.	.	0,0,0	14	4.50871	3.67912	3.44833	4.22219	6	5	5	6	0.0228825	0.0163433	0.0211163	0.0587062
10	83855000	83860000	10	83890000	83895000	.	.	.	.	0,0,0	31	9.4149	13.3089	14.7391	6.6116	9	11	11	8	3.29237e-06	0.00256187	0.00590373	2.91662e-07
10	83855000	83860000	10	84250000	84255000	.	.	.	.	0,0,0	21	5.61344	6.65335	7.10787	6.89129	7	8	8	8	0.000236683	0.00266206	0.00581603	0.00508086
10	83855000	83860000	10	84260000	84265000	.	.	.	.	0,0,0	23	6.67089	7.0014	7.87534	7.70198	8	8	9	8	0.000326575	0.000599721	0.00841452	0.00108839
10	83855000	83860000	10	84615000	84620000	.	.	.	.	0,0,0	34	8.13684	12.5511	17.8481	12.7277	9	11	12	11	1.4607e-07	0.000391567	0.0157276	0.000899618
10	83855000	83860000	10	84645000	84650000	.	.	.	.	0,0,0	22	8.3944	7.98272	10.663	10.4888	9	9	10	10	0.0054492	0.00767982	0.0787497	0.0805399
10	83855000	83860000	10	84650000	84655000	.	.	.	.	0,0,0	22	7.96922	6.86853	11.0078	9.67303	9	8	10	9	0.0054492	0.00131262	0.0787497	0.0160889
10	83870000	83875000	10	84615000	84620000	.	.	.	.	0,0,0	18	3.10321	5.89893	6.31167	7.14647	4	7	8	8	1.92072e-05	0.00597717	0.0405628	0.0395652
10	83875000	83880000	10	84200000	84205000	.	.	.	.	0,0,0	19	6.47832	7.66276	8.4916	8.78624	8	8	9	9	0.00762887	0.0110845	0.0811282	0.0835667
10	83875000	83880000	10	84265000	84270000	.	.	.	.	0,0,0	22	5.28618	6.58474	7.13438	10.4879	7	8	8	10	9.34461e-05	0.00131262	0.00271474	0.0805399
10	83875000	83880000	10	84615000	84620000	.	.	.	.	0,0,0	28	5.94875	10.6378	12.7494	12.4529	7	10	11	11	9.60529e-08	0.00124135	0.0287076	0.0287996
10	83875000	83880000	10	84650000	84655000	.	.	.	.	0,0,0	19	5.08351	6.54283	7.72892	9.39023	7	8	8	9	0.00143139	0.0110845	0.0225188	0.0835667
10	84265000	84270000	10	84615000	84620000	.	.	.	.	0,0,0	17	3.64183	5.59648	5.34934	6.76135	5	7	7	8	0.000427159	0.0124709	0.0209371	0.0701872
10	84615000	84620000	10	84650000	84655000	.	.	.	.	0,0,0	37	7.74676	16.0079	7.85016	6.56494	8	12	9	8	5.24704e-11	0.0013852	3.308e-08	2.12455e-10
10	84615000	84620000	10	84655000	84660000	.	.	.	.	0,0,0	31	5.86312	10.2018	15.8934	13.9437	7	10	12	11	1.95586e-09	0.000147501	0.0549939	0.00594302
10	84645000	84650000	10	84710000	84715000	.	.	.	.	0,0,0	15	4.84204	4.96078	4.40477	5.59733	6	7	6	7	0.0107279	0.0443084	0.0275802	0.0788116
10	84900000	84905000	10	84960000	84965000	.	.	.	.	0,0,0	12	3.79015	3.24426	3.64169	1.77934	5	5	5	2	0.0434891	0.0690511	0.0986332	0.00774442
10	85555000	85560000	10	85720000	85725000	.	.	.	.	0,0,0	17	2.4893	3.0646	5.02861	3.94817	3	4	7	6	1.05904e-05	0.000149312	0.0209371	0.00571705
10	89135000	89140000	10	89305000	89310000	.	.	.	.	0,0,0	17	2.41959	2.92976	3.56503	3.07273	3	4	5	4	1.05904e-05	0.000149312	0.00113376	0.000174104
10	89345000	89350000	10	89440000	89445000	.	.	.	.	0,0,0	18	4.06284	4.57133	6.10119	6.79961	6	6	7	8	0.000711911	0.00136262	0.00955531	0.0395652
10	89725000	89730000	10	89775000	89780000	.	.	.	.	0,0,0	15	2.81826	3.2969	3.67845	5.15061	4	5	5	7	0.000962873	0.00690573	0.00832192	0.0788116
10	90650000	90655000	10	90690000	90695000	.	.	.	.	0,0,0	17	3.23976	4.24312	4.95122	7.45082	5	6	6	8	0.000427159	0.00372722	0.00586356	0.0701872
10	91795000	91800000	10	91860000	91865000	.	.	.	.	0,0,0	11	2.26405	1.90378	1.53796	1.50862	3	2	1	1	0.0246042	0.0253787	0.0109955	0.00835868
10	92925000	92930000	10	93065000	93070000	.	.	.	.	0,0,0	12	2.27511	2.11374	3.36642	1.70439	3	3	5	2	0.00902681	0.0201631	0.0986332	0.00774442
10	93545000	93550000	10	93600000	93605000	.	.	.	.	0,0,0	17	7.19363	7.02191	7.34477	7.47348	8	8	8	8	0.0279685	0.0372598	0.0725713	0.0701872
10	94320000	94325000	10	94490000	94495000	.	.	.	.	0,0,0	33	9.90063	9.05335	13.9317	6.90861	10	9	11	8	1.86509e-05	7.80281e-07	0.00172605	2.38525e-08
10	94490000	94495000	10	94560000	94565000	.	.	.	.	0,0,0	40	13.0859	11.7844	14.378	15.9157	11	10	11	12	2.89359e-06	5.27872e-08	1.01265e-05	0.000650675
10	94490000	94495000	10	94625000	94630000	.	.	.	.	0,0,0	15	3.46461	3.68838	3.51854	4.49066	5	5	5	6	0.00346019	0.00690573	0.00832192	0.0288497
10	95195000	95200000	10	95405000	95410000	.	.	.	.	0,0,0	13	2.44891	2.27865	3.67823	2.78883	3	3	5	4	0.00279279	0.00654614	0.0486373	0.0198157
10	96520000	96525000	10	96830000	96835000	.	.	.	.	0,0,0	20	3.58036	3.58274	5.35777	2.8855	5	5	7	4	9.25108e-06	2.53967e-05	0.00186628	2.05676e-06
10	96740000	96745000	10	96830000	96835000	.	.	.	.	0,0,0	37	14.773	14.609	14.428	16.6554	11	11	11	12	3.21996e-05	4.69472e-05	0.000112298	0.00363813
10	96740000	96745000	10	96930000	96935000	.	.	.	.	0,0,0	20	6.21036	5.17023	5.75172	8.18608	7	7	7	9	0.000595801	0.00125312	0.00186628	0.0503354
10	96740000	96745000	10	97080000	97085000	.	.	.	.	0,0,0	21	7.9012	5.31214	6.03013	6.0732	9	7	7	7	0.0104689	0.000498246	0.000729734	0.000745968
10	96775000	96780000	10	97070000	97075000	.	.	.	.	0,0,0	11	1.41716	1.63206	2.31665	2.41575	1	2	3	3	0.0056938	0.0253787	0.0538051	0.0568751
10	96830000	96835000	10	96865000	96870000	.	.	.	.	0,0,0	20	4.5632	12.1157	6.27562	7.58226	6	10	8	8	8.77235e-05	0.0909338	0.0117797	0.010513
10	96830000	96835000	10	96895000	96900000	.	.	.	.	0,0,0	41	14.7804	15.8886	23.5259	16.5102	11	12	13	12	1.28208e-06	0.000124006	0.0110692	0.00036115
10	96830000	96835000	10	96930000	96935000	.	.	.	.	0,0,0	64	22.0689	23.6308	33.0581	13.8295	13	13	15	11	7.2695e-10	7.4559e-10	0.00112429	8.5498e-17
10	96830000	96835000	10	97080000	97085000	.	.	.	.	0,0,0	23	9.95585	7.46274	6.95134	7.10951	10	8	8	8	0.0210034	0.000599721	0.00126515	0.00108839
10	96890000	96895000	10	96930000	96935000	.	.	.	.	0,0,0	31	11.3975	13.2845	18.7129	14.2124	10	11	12	11	9.8328e-05	0.00256187	0.0549939	0.00594302
10	96895000	96900000	10	96930000	96935000	.	.	.	.	0,0,0	37	13.7865	15.0743	15.5241	12.8359	11	11	11	11	3.21996e-05	4.69472e-05	0.000112298	0.000110166
11	755000	760000	11	1115000	1120000	.	.	.	.	0,0,0	22	3.24164	3.29017	4.66457	6.18699	5	5	6	7	5.97413e-07	1.76596e-06	2.64616e-05	0.000261144
11	795000	800000	11	840000	845000	.	.	.	.	0,0,0	24	7.49687	9.188	8.95054	10.4739	8	9	9	10	0.000133047	0.00206957	0.00452125	0.0318924
11	795000	800000	11	905000	910000	.	.	.	.	0,0,0	14	3.18184	4.51037	4.66903	4.47521	5	6	6	6	0.00871876	0.0356873	0.0591247	0.0587062
11	805000	810000	11	840000	845000	.	.	.	.	0,0,0	29	7.8853	11.1598	9.49298	10.6601	9	10	9	10	2.20184e-05	0.000631809	9.31885e-05	0.00154329
11	805000	810000	11	845000	850000	.	.	.	.	0,0,0	22	7.9725	7.84999	6.18629	9.58867	9	9	7	9	0.0054492	0.00767982	0.0002794	0.0160889
11	2095000	2100000	11	2260000	2265000	.	.	.	.	0,0,0	12	1.31624	1.82699	3.46375	1.48764	1	2	5	1	0.00130973	0.0078592	0.0986332	0.0018916
11	2210000	2215000	11	2250000	2255000	.	.	.	.	0,0,0	27	6.55171	7.72995	10.0647	7.85742	8	8	10	9	6.8662e-06	1.53397e-05	0.00512333	0.000441327
11	2210000	2215000	11	2300000	2305000	.	.	.	.	0,0,0	21	6.25981	6.23493	8.36224	5.5719	8	8	9	7	0.00167172	0.00266206	0.0277717	0.000745968
11	2215000	2220000	11	2250000	2255000	.	.	.	.	0,0,0	48	12.1368	15.4603	18.5436	11.8168	10	11	12	10	2.64796e-12	2.76967e-09	2.38014e-06	1.25915e-11
11	2215000	2220000	11	2290000	2295000	.	.	.	.	0,0,0	22	6.73104	7.38389	8.93499	7.72997	8	8	9	8	0.000735879	0.00131262	0.0153007	0.00247951
11	2215000	2220000	11	2305000	2310000	.	.	.	.	0,0,0	22	7.05506	6.54952	9.23098	7.1199	8	8	9	8	0.000735879	0.00131262	0.0153007	0.00247951
11	2220000	2225000	11	2295000	2300000	.	.	.	.	0,0,0	16	4.40841	4.73653	5.83387	4.7497	6	6	7	6	0.00461177	0.00815994	0.0419077	0.0132102
11	2250000	2255000	11	2305000	2310000	.	.	.	.	0,0,0	19	6.11164	6.55104	8.00918	7.74284	7	8	9	8	0.00143139	0.0110845	0.0811282	0.0214388
11	2095000	2100000	11	2545000	2550000	.	.	.	.	0,0,0	12	2.34931	2.65584	3.26654	1.61658	3	4	5	2	0.00902681	0.0353788	0.0986332	0.00774442
11	2215000	2220000	11	2480000	2485000	.	.	.	.	0,0,0	16	6.18603	4.1165	4.72607	5.45048	7	6	6	7	0.0151448	0.00815994	0.0124265	0.0437082
11	2220000	2225000	11	2480000	2485000	.	.	.	.	0,0,0	11	2.56751	1.93152	1.99805	2.32131	4	2	3	3	0.0491346	0.0253787	0.0538051	0.0568751
11	3175000	3180000	11	3210000	3215000	.	.	.	.	0,0,0	18	5.76343	8.13522	7.41088	7.04377	7	9	8	8	0.00326602	0.0662561	0.0405628	0.0395652
11	3860000	3865000	11	3895000	3900000	.	.	.	.	0,0,0	16	3.88128	5.37495	4.26744	5.42733	5	7	6	7	0.00124328	0.0236047	0.0124265	0.0437082
11	6085000	6090000	11	6120000	6125000	.	.	.	.	0,0,0	24	3.54509	7.79437	5.86358	4.53769	5	8	7	6	3.0566e-08	0.000255271	3.42544e-05	2.27628e-06
11	6085000	6090000	11	6125000	6130000	.	.	.	.	0,0,0	36	10.9546	12.37	13.8435	15.3566	10	10	11	11	1.27911e-06	2.37673e-06	0.000238407	0.000236202
11	6085000	6090000	11	6130000	6135000	.	.	.	.	0,0,0	39	16.367	19.2727	20.9684	16.9681	12	12	13	12	0.000417066	0.000423736	0.0255814	0.00118106
11	6085000	6090000	11	6430000	6435000	.	.	.	.	0,0,0	15	5.90801	4.95589	5.28475	5.2556	7	6	7	7	0.0291065	0.0174153	0.0779212	0.0788116
11	6160000	6165000	11	6500000	6505000	.	.	.	.	0,0,0	14	2.10433	2.0936	2.73377	2.81113	3	3	4	4	0.000848655	0.00211409	0.00793464	0.00726851
11	6365000	6370000	11	6400000	6405000	.	.	.	.	0,0,0	20	3.73344	11.1565	9.79314	4.47973	5	10	9	6	9.25108e-06	0.0909338	0.0479493	0.000258067
11	6555000	6560000	11	6605000	6610000	.	.	.	.	0,0,0	24	7.94665	8.66278	11.2133	10.2094	9	9	10	10	0.00139856	0.00206957	0.0294512	0.0318924
11	6555000	6560000	11	6610000	6615000	.	.	.	.	0,0,0	54	15.3852	14.4932	17.7207	15.3697	11	11	12	11	2.31484e-12	4.50824e-12	1.45151e-08	1.13449e-11
11	6565000	6570000	11	6605000	6610000	.	.	.	.	0,0,0	26	3.5422	6.99637	8.19119	11.7508	5	8	9	10	1.32806e-09	4.27594e-05	0.00104429	0.0106321
11	6570000	6575000	11	6610000	6615000	.	.	.	.	0,0,0	25	12.5052	11.1764	12.1418	12.0589	11	10	10	10	0.0499474	0.00803229	0.0174733	0.0189756
11	9620000	9625000	11	9660000	9665000	.	.	.	.	0,0,0	19	5.67625	6.70403	9.1799	6.61573	7	8	9	8	0.00143139	0.0110845	0.0811282	0.0214388
11	9625000	9630000	11	9665000	9670000	.	.	.	.	0,0,0	17	6.9954	6.54607	7.03796	7.45297	8	8	8	8	0.0279685	0.0372598	0.0725713	0.0701872
11	9895000	9900000	11	9950000	9955000	.	.	.	.	0,0,0	15	2.57707	3.74496	5.19002	3.91615	4	5	7	5	0.000962873	0.00690573	0.0779212	0.00963794
11	9900000	9905000	11	9935000	9940000	.	.	.	.	0,0,0	15	1.66623	4.47026	2.62398	2.07406	2	6	4	3	4.03619e-05	0.0174153	0.00238489	0.000640135
11	9930000	9935000	11	9965000	9970000	.	.	.	.	0,0,0	23	4.2217	10.8587	4.1533	6.2629	6	10	6	8	2.61366e-06	0.0232949	7.94883e-06	0.00108839
11	9970000	9975000	11	10005000	10010000	.	.	.	.	0,0,0	20	4.66851	12.2081	6.72565	6.51963	6	10	8	8	8.77235e-05	0.0909338	0.0117797	0.010513
11	10335000	10340000	11	10710000	10715000	.	.	.	.	0,0,0	18	7.64354	6.05833	6.02748	6.4049	8	7	7	8	0.0149558	0.00597717	0.00955531	0.0395652
11	11155000	11160000	11	11195000	11200000	.	.	.	.	0,0,0	17	5.92805	5.93603	3.54729	6.56574	7	7	5	8	0.00735115	0.0124709	0.00113376	0.0701872
11	11195000	11200000	11	11240000	11245000	.	.	.	.	0,0,0	27	8.28818	10.7847	13.4418	11.1618	9	10	11	10	0.000132942	0.00243569	0.0474394	0.00579741
11	11195000	11200000	11	11425000	11430000	.	.	.	.	0,0,0	13	2.19493	1.82552	2.43076	3.79838	3	2	3	5	0.00279279	0.00201123	0.00773561	0.0522406
11	13115000	13120000	11	13275000	13280000	.	.	.	.	0,0,0	23	3.86628	6.47272	6.78572	7.53916	5	8	8	8	1.36611e-07	0.000599721	0.00126515	0.00108839
11	13115000	13120000	11	13300000	13305000	.	.	.	.	0,0,0	14	3.1943	4.05772	2.96574	3.67887	5	6	4	5	0.00871876	0.0356873	0.00793464	0.0239566
11	19850000	19855000	11	19970000	19975000	.	.	.	.	0,0,0	28	9.60122	10.4039	14.2765	9.25286	9	10	11	9	5.39532e-05	0.00124135	0.0287076	0.000187249
11	20805000	20810000	11	20840000	20845000	.	.	.	.	0,0,0	14	1.26498	3.35746	2.46627	3.24772	1	5	3	5	4.42753e-05	0.0163433	0.00238482	0.0239566
11	22640000	22645000	11	22745000	22750000	.	.	.	.	0,0,0	18	6.34716	5.83126	6.63368	7.42255	8	7	8	8	0.0149558	0.00597717	0.0405628	0.0395652
11	24400000	24405000	11	24435000	24440000	.	.	.	.	0,0,0	38	17.9104	15.9152	18.6168	18.9838	12	12	12	12	0.000776937	0.00077613	0.001847	0.00211685
11	24400000	24405000	11	24590000	24595000	.	.	.	.	0,0,0	16	4.28493	4.3843	5.09113	4.1992	6	6	7	6	0.00461177	0.00815994	0.0419077	0.0132102
11	24400000	24405000	11	24595000	24600000	.	.	.	.	0,0,0	22	8.77034	8.45633	9.65616	10.1816	9	9	9	10	0.0054492	0.00767982	0.0153007	0.0805399
11	24400000	24405000	11	24600000	24605000	.	.	.	.	0,0,0	35	9.18387	7.98469	11.7931	8.55592	9	9	10	9	5.13126e-08	9.61738e-08	1.20937e-05	2.44849e-07
11	24400000	24405000	11	24605000	24610000	.	.	.	.	0,0,0	17	4.95302	3.9482	5.7274	5.41961	6	6	7	7	0.00197485	0.00372722	0.0209371	0.0222102
11	24415000	24420000	11	24485000	24490000	.	.	.	.	0,0,0	14	3.96446	4.491	4.39605	4.62552	6	6	6	6	0.0228825	0.0356873	0.0591247	0.0587062
11	25200000	25205000	11	25305000	25310000	.	.	.	.	0,0,0	19	6.63743	7.25605	6.98876	9.15344	8	8	8	9	0.00762887	0.0110845	0.0225188	0.0835667
11	25200000	25205000	11	25390000	25395000	.	.	.	.	0,0,0	28	9.62268	9.85821	9.08205	13.2108	9	10	9	11	5.39532e-05	0.00124135	0.00021104	0.0287996
11	25210000	25215000	11	25305000	25310000	.	.	.	.	0,0,0	19	6.14923	6.61855	7.01746	6.1619	7	8	8	7	0.00143139	0.0110845	0.0225188	0.00453518
11	25235000	25240000	11	25365000	25370000	.	.	.	.	0,0,0	16	3.72507	4.74675	4.31381	4.10328	5	6	6	6	0.00124328	0.00815994	0.0124265	0.0132102
11	25285000	25290000	11	25390000	25395000	.	.	.	.	0,0,0	25	10.5412	7.81516	9.87745	11.6883	10	8	10	10	0.00663746	0.000106803	0.0174733	0.0189756
11	25290000	25295000	11	25355000	25360000	.	.	.	.	0,0,0	17	5.32001	7.36376	7.27455	6.20185	7	8	8	7	0.00735115	0.0372598	0.0725713	0.0222102
11	25290000	25295000	11	25390000	25395000	.	.	.	.	0,0,0	38	18.1928	15.1938	19.4461	16.7926	12	11	12	12	0.000776937	2.26092e-05	0.001847	0.00211685
11	25295000	25300000	11	25390000	25395000	.	.	.	.	0,0,0	21	9.756	8.60289	8.10561	9.7426	9	9	9	9	0.0104689	0.0139646	0.0277717	0.029154
11	25305000	25310000	11	25340000	25345000	.	.	.	.	0,0,0	22	9.38746	12.1195	9.04174	11.1094	9	10	9	10	0.0054492	0.0377448	0.0153007	0.0805399
11	25305000	25310000	11	25385000	25390000	.	.	.	.	0,0,0	39	10.1136	11.3727	12.3299	21.6628	10	10	10	13	7.0096e-08	1.34465e-07	2.78164e-07	0.0253346
11	25305000	25310000	11	25390000	25395000	.	.	.	.	0,0,0	47	16.5671	16.1184	16.6504	24.6225	12	12	12	14	1.39635e-06	1.59843e-06	4.97448e-06	0.0193417
11	25310000	25315000	11	25345000	25350000	.	.	.	.	0,0,0	39	17.177	17.8211	17.8074	18.5334	12	12	12	12	0.000417066	0.000423736	0.00104077	0.00118106
11	25310000	25315000	11	25380000	25385000	.	.	.	.	0,0,0	31	8.49483	12.9175	14.4832	18.9219	9	11	11	12	3.29237e-06	0.00256187	0.00590373	0.0597068
11	25310000	25315000	11	25385000	25390000	.	.	.	.	0,0,0	52	12.3504	13.8766	13.5495	26.7934	10	11	11	14	1.8317e-14	4.01072e-11	9.74162e-11	0.00249121
11	25310000	25315000	11	25390000	25395000	.	.	.	.	0,0,0	53	20.1932	19.3752	16.8709	30.69	13	12	12	14	4.02812e-06	1.19545e-08	3.49212e-08	0.00156193
11	25345000	25350000	11	25380000	25385000	.	.	.	.	0,0,0	36	7.14129	12.8851	11.5403	15.7251	8	11	10	12	2.06796e-10	0.000102075	4.82889e-06	0.00648461
11	25345000	25350000	11	25390000	25395000	.	.	.	.	0,0,0	53	16.0524	17.9565	34.2657	25.4388	12	12	15	14	8.00581e-09	1.19545e-08	0.060928	0.00156193
11	25350000	25355000	11	25385000	25390000	.	.	.	.	0,0,0	21	6.59138	8.6632	7.53288	9.81706	8	9	8	9	0.00167172	0.0139646	0.00581603	0.029154
11	26070000	26075000	11	26220000	26225000	.	.	.	.	0,0,0	14	2.35077	3.02745	4.39592	2.45752	3	4	6	3	0.000848655	0.00587831	0.0591247	0.00232403
11	27675000	27680000	11	27810000	27815000	.	.	.	.	0,0,0	13	2.1418	2.5543	2.83382	2.07049	3	4	4	3	0.00279279	0.0159952	0.0195784	0.00750925
11	28505000	28510000	11	28635000	28640000	.	.	.	.	0,0,0	14	4.35221	3.36327	4.08725	4.38203	6	5	6	6	0.0228825	0.0163433	0.0591247	0.0587062
11	28540000	28545000	11	28575000	28580000	.	.	.	.	0,0,0	24	7.03414	7.70417	9.61686	6.47052	8	8	9	8	0.000133047	0.000255271	0.00452125	0.000447412
11	28575000	28580000	11	29165000	29170000	.	.	.	.	0,0,0	17	7.07552	5.78816	6.27625	5.57042	8	7	8	7	0.0279685	0.0124709	0.0725713	0.0222102
11	28950000	28955000	11	28995000	29000000	.	.	.	.	0,0,0	32	7.95933	8.92538	8.82781	10.0637	9	9	9	10	1.24884e-06	2.20662e-06	5.50303e-06	0.000178515
11	28995000	29000000	11	29030000	29035000	.	.	.	.	0,0,0	22	5.25661	9.87561	8.26424	6.98916	7	10	9	8	9.34461e-05	0.0377448	0.0153007	0.00247951
11	29020000	29025000	11	29165000	29170000	.	.	.	.	0,0,0	20	7.11631	7.34226	9.68859	8.86835	8	8	9	9	0.00365306	0.00552989	0.0479493	0.0503354
11	29025000	29030000	11	29165000	29170000	.	.	.	.	0,0,0	24	8.14599	8.01901	12.0883	8.95596	9	9	10	9	0.00139856	0.00206957	0.0294512	0.00427756
11	29030000	29035000	11	29165000	29170000	.	.	.	.	0,0,0	44	12.6156	13.1293	18.8239	13.883	11	11	12	11	8.38441e-08	1.43339e-07	4.60663e-05	3.50937e-07
11	29035000	29040000	11	29165000	29170000	.	.	.	.	0,0,0	47	11.8691	13.2345	16.3882	16.514	10	11	12	12	9.14259e-12	7.56538e-09	4.97448e-06	4.91526e-06
11	29825000	29830000	11	29890000	29895000	.	.	.	.	0,0,0	20	6.34713	8.29584	7.46184	8.59631	8	9	8	9	0.00365306	0.0239339	0.0117797	0.0503354
11	29825000	29830000	11	30325000	30330000	.	.	.	.	0,0,0	19	8.16921	6.86755	6.84269	7.29515	9	8	8	8	0.033828	0.0110845	0.0225188	0.0214388
11	37330000	37335000	11	37365000	37370000	.	.	.	.	0,0,0	12	2.79485	2.60981	3.6436	1.99083	4	4	5	3	0.0209391	0.0353788	0.0986332	0.0224049
11	42750000	42755000	11	42785000	42790000	.	.	.	.	0,0,0	15	4.10582	4.03311	4.82838	3.60083	6	6	6	5	0.0107279	0.0174153	0.0275802	0.00963794
11	43135000	43140000	11	43225000	43230000	.	.	.	.	0,0,0	15	4.09985	4.10636	5.87495	3.02706	6	6	7	4	0.0107279	0.0174153	0.0779212	0.00248769
11	43145000	43150000	11	43225000	43230000	.	.	.	.	0,0,0	27	10.2423	10.4053	10.6842	12.3047	10	10	10	10	0.00183564	0.00243569	0.00512333	0.00579741
11	43155000	43160000	11	43225000	43230000	.	.	.	.	0,0,0	24	7.8228	8.11118	7.55896	8.87423	8	9	8	9	0.000133047	0.00206957	0.000526658	0.00427756
11	43225000	43230000	11	43355000	43360000	.	.	.	.	0,0,0	15	3.56897	4.1597	4.41399	5.11252	5	6	6	7	0.00346019	0.0174153	0.0275802	0.0788116
11	45845000	45850000	11	45890000	45895000	.	.	.	.	0,0,0	15	6.87273	5.44822	5.74814	4.21426	8	7	7	6	0.0866935	0.0443084	0.0779212	0.0288497
11	45975000	45980000	11	46010000	46015000	.	.	.	.	0,0,0	24	7.17286	9.14679	10.3611	8.31152	8	9	10	9	0.000133047	0.00206957	0.0294512	0.00427756
11	46010000	46015000	11	46235000	46240000	.	.	.	.	0,0,0	15	3.97779	4.011	5.20833	6.11283	6	6	7	7	0.0107279	0.0174153	0.0779212	0.0788116
11	46470000	46475000	11	46590000	46595000	.	.	.	.	0,0,0	20	8.00479	7.29458	2.36287	8.07482	9	8	3	9	0.0189875	0.00552989	1.43132e-07	0.0503354
11	46495000	46500000	11	46530000	46535000	.	.	.	.	0,0,0	25	7.04338	12.2482	8.46745	7.43835	8	10	9	8	5.23604e-05	0.00803229	0.00214828	0.000177305
11	46530000	46535000	11	46725000	46730000	.	.	.	.	0,0,0	14	4.56176	6.07258	4.701	4.57326	6	7	6	6	0.0228825	0.0783645	0.0591247	0.0587062
11	46555000	46560000	11	46740000	46745000	.	.	.	.	0,0,0	15	3.39475	3.63332	2.29919	5.38247	5	5	3	7	0.00346019	0.00690573	0.000626702	0.0788116
11	46590000	46595000	11	46725000	46730000	.	.	.	.	0,0,0	29	7.41283	10.7626	11.8649	9.29373	8	10	10	9	8.33648e-07	0.000631809	0.00133429	7.83373e-05
11	46590000	46595000	11	47040000	47045000	.	.	.	.	0,0,0	18	6.82455	7.21776	5.18907	4.5149	8	8	7	6	0.0149558	0.020608	0.00955531	0.00212992
11	46605000	46610000	11	46740000	46745000	.	.	.	.	0,0,0	24	5.61353	7.78864	8.44259	8.12991	7	8	9	9	1.10059e-05	0.000255271	0.00452125	0.00427756
11	46700000	46705000	11	46740000	46745000	.	.	.	.	0,0,0	24	7.46707	7.47602	6.64657	7.81306	8	8	8	8	0.000133047	0.000255271	0.000526658	0.000447412
11	46725000	46730000	11	46990000	46995000	.	.	.	.	0,0,0	12	4.84741	3.61478	3.59929	1.58673	6	5	5	2	0.0852293	0.0690511	0.0986332	0.00774442
11	46725000	46730000	11	47040000	47045000	.	.	.	.	0,0,0	19	9.37082	7.81719	8.41644	5.26347	9	8	9	7	0.033828	0.0110845	0.0811282	0.00453518
11	46800000	46805000	11	47040000	47045000	.	.	.	.	0,0,0	13	2.24774	4.00269	3.78014	3.25952	3	6	5	5	0.00279279	0.0652956	0.0486373	0.0522406
11	46955000	46960000	11	47040000	47045000	.	.	.	.	0,0,0	22	10.0818	10.8865	12.296	12.0698	10	10	10	10	0.0353406	0.0377448	0.0787497	0.0805399
11	47005000	47010000	11	47040000	47045000	.	.	.	.	0,0,0	67	23.1016	26.3442	23.0905	28.2581	13	14	13	14	5.37832e-11	1.46645e-07	1.94252e-10	5.30517e-07
11	47005000	47010000	11	47085000	47090000	.	.	.	.	0,0,0	50	9.80724	8.70715	14.8587	13.3154	9	9	11	11	9.57484e-17	3.47592e-16	8.8924e-10	8.47688e-10
11	47005000	47010000	11	47090000	47095000	.	.	.	.	0,0,0	18	4.58429	3.95365	6.44597	5.9551	6	6	8	7	0.000711911	0.00136262	0.0405628	0.010062
11	47015000	47020000	11	47085000	47090000	.	.	.	.	0,0,0	22	6.69719	7.29384	8.24735	11.5314	8	8	9	10	0.000735879	0.00131262	0.0153007	0.0805399
11	47040000	47045000	11	47075000	47080000	.	.	.	.	0,0,0	37	18.7372	20.4433	14.2772	24.1267	12	13	11	13	0.00139352	0.0290156	0.000112298	0.0547185
11	47040000	47045000	11	47085000	47090000	.	.	.	.	0,0,0	82	31.7133	29.3727	29.6172	26.8659	15	14	14	14	2.88057e-08	1.07472e-12	2.98812e-12	3.33259e-12
11	47045000	47050000	11	47085000	47090000	.	.	.	.	0,0,0	20	9.00981	9.69197	8.24167	9.6182	9	9	9	9	0.0189875	0.0239339	0.0479493	0.0503354
11	47020000	47025000	11	47885000	47890000	.	.	.	.	0,0,0	11	1.50946	1.49173	1.66211	2.15182	1	1	2	3	0.0056938	0.0100755	0.0244088	0.0568751
11	47885000	47890000	11	48045000	48050000	.	.	.	.	0,0,0	16	6.13828	4.95311	5.70163	5.00511	7	6	7	7	0.0151448	0.00815994	0.0419077	0.0437082
11	48045000	48050000	11	48275000	48280000	.	.	.	.	0,0,0	12	3.02288	2.55614	2.40605	2.3594	4	4	3	3	0.0209391	0.0353788	0.0224015	0.0224049
11	48575000	48580000	11	48645000	48650000	.	.	.	.	0,0,0	15	3.60108	3.28535	2.76458	4.57314	5	5	4	6	0.00346019	0.00690573	0.00238489	0.0288497
11	48915000	48920000	11	49185000	49190000	.	.	.	.	0,0,0	21	10.2878	6.97762	8.76409	7.87918	10	8	9	9	0.0574395	0.00266206	0.0277717	0.029154
11	48990000	48995000	11	49100000	49105000	.	.	.	.	0,0,0	39	14.1583	14.2227	17.069	15.541	11	11	12	11	6.55908e-06	1.06053e-05	0.00104077	2.46565e-05
11	49160000	49165000	11	49205000	49210000	.	.	.	.	0,0,0	15	5.39595	4.95049	5.92697	3.62626	7	6	7	5	0.0291065	0.0174153	0.0779212	0.00963794
11	59785000	59790000	11	59860000	59865000	.	.	.	.	0,0,0	27	11.0164	9.57084	10.9084	11.4454	10	9	10	10	0.00183564	0.000208112	0.00512333	0.00579741
11	59785000	59790000	11	60160000	60165000	.	.	.	.	0,0,0	15	4.71849	3.95889	4.4791	4.90123	6	6	6	6	0.0107279	0.0174153	0.0275802	0.0288497
11	59860000	59865000	11	60160000	60165000	.	.	.	.	0,0,0	14	2.57321	2.53527	3.66674	2.88471	4	4	5	4	0.00312035	0.00587831	0.0211163	0.00726851
11	60065000	60070000	11	60160000	60165000	.	.	.	.	0,0,0	15	3.60632	3.72826	2.85411	4.64565	5	5	4	6	0.00346019	0.00690573	0.00238489	0.0288497
11	60330000	60335000	11	60410000	60415000	.	.	.	.	0,0,0	19	6.98863	7.60124	9.16847	7.45949	8	8	9	8	0.00762887	0.0110845	0.0811282	0.0214388
11	62010000	62015000	11	62650000	62655000	.	.	.	.	0,0,0	16	6.09307	4.361	2.68414	5.83973	7	6	4	7	0.0151448	0.00815994	0.000719294	0.0437082
11	62015000	62020000	11	62070000	62075000	.	.	.	.	0,0,0	12	2.39194	2.66349	2.80946	1.80232	3	4	4	2	0.00902681	0.0353788	0.0483231	0.00774442
11	62295000	62300000	11	62435000	62440000	.	.	.	.	0,0,0	31	13.1867	13.6072	15.7576	17.0062	11	11	12	12	0.00210759	0.00256187	0.0549939	0.0597068
11	62345000	62350000	11	62445000	62450000	.	.	.	.	0,0,0	21	8.99653	7.93768	8.88683	7.71275	9	9	9	8	0.0104689	0.0139646	0.0277717	0.00508086
11	62355000	62360000	11	62425000	62430000	.	.	.	.	0,0,0	45	15.741	16.2332	19.4323	16.2517	12	12	12	12	6.76516e-06	7.35597e-06	2.28404e-05	2.23466e-05
11	62355000	62360000	11	62435000	62440000	.	.	.	.	0,0,0	42	16.1215	17.3211	21.3054	20.3755	12	12	13	13	5.79e-05	6.45147e-05	0.00722942	0.00714479
11	62365000	62370000	11	62425000	62430000	.	.	.	.	0,0,0	39	14.0939	15.6998	17.5849	16.0545	11	12	12	12	6.55908e-06	0.000423736	0.00104077	0.00118106
11	62365000	62370000	11	62435000	62440000	.	.	.	.	0,0,0	51	11.1288	15.7865	19.0797	19.5455	10	12	12	12	6.91636e-14	6.58593e-08	1.98116e-07	1.85998e-07
11	62445000	62450000	11	62650000	62655000	.	.	.	.	0,0,0	16	7.65877	6.29721	5.96377	5.32778	8	8	7	7	0.0509687	0.0650454	0.0419077	0.0437082
11	62650000	62655000	11	62775000	62780000	.	.	.	.	0,0,0	20	4.50221	5.70009	5.54481	7.92727	6	7	7	9	8.77235e-05	0.00125312	0.00186628	0.0503354
11	62650000	62655000	11	62785000	62790000	.	.	.	.	0,0,0	18	5.86677	5.65926	6.30435	4.85253	7	7	8	6	0.00326602	0.00597717	0.0405628	0.00212992
11	62650000	62655000	11	63325000	63330000	.	.	.	.	0,0,0	13	2.5631	2.19329	1.88263	2.54663	4	3	2	4	0.00846838	0.00654614	0.0020789	0.0198157
11	62775000	62780000	11	62855000	62860000	.	.	.	.	0,0,0	21	4.95109	5.66564	6.14266	8.13368	6	7	7	9	2.79519e-05	0.000498246	0.000729734	0.029154
11	62775000	62780000	11	63005000	63010000	.	.	.	.	0,0,0	25	2.84725	4.1362	7.56828	6.76931	4	6	8	8	3.42763e-10	4.47046e-07	0.000218788	0.000177305
11	62785000	62790000	11	63005000	63010000	.	.	.	.	0,0,0	21	3.14998	5.2034	4.39141	8.7369	5	7	6	9	2.62742e-06	0.000498246	8.29506e-05	0.029154
11	62875000	62880000	11	63005000	63010000	.	.	.	.	0,0,0	20	5.21605	5.54068	6.09183	7.49115	7	7	7	8	0.000595801	0.00125312	0.00186628	0.010513
11	66485000	66490000	11	66550000	66555000	.	.	.	.	0,0,0	15	4.3347	4.55121	5.77843	4.25183	6	6	7	6	0.0107279	0.0174153	0.0779212	0.0288497
11	66585000	66590000	11	66795000	66800000	.	.	.	.	0,0,0	20	5.06604	5.85763	8.73203	4.45094	7	7	9	6	0.000595801	0.00125312	0.0479493	0.000258067
11	66785000	66790000	11	66825000	66830000	.	.	.	.	0,0,0	24	7.17898	8.63285	11.3091	8.31616	8	9	10	9	0.000133047	0.00206957	0.0294512	0.00427756
11	66790000	66795000	11	66825000	66830000	.	.	.	.	0,0,0	42	12.4492	15.597	18.1859	12.7336	11	12	12	11	5.37477e-07	6.45147e-05	0.000172437	2.18951e-06
11	66790000	66795000	11	66835000	66840000	.	.	.	.	0,0,0	43	8.67632	8.81519	11.1689	10.5464	9	9	10	10	2.31071e-12	5.73949e-12	4.03386e-09	4.82878e-09
11	66795000	66800000	11	66830000	66835000	.	.	.	.	0,0,0	28	8.35023	11.9869	10.0086	12.0665	9	10	10	10	5.39532e-05	0.00124135	0.00269227	0.00303266
11	66800000	66805000	11	66835000	66840000	.	.	.	.	0,0,0	32	12.0412	13.1907	15.3307	10.6259	10	11	11	10	4.35595e-05	0.00145406	0.00327101	0.000178515
11	66800000	66805000	11	66880000	66885000	.	.	.	.	0,0,0	17	5.66272	5.78991	5.806	6.16407	7	7	7	7	0.00735115	0.0124709	0.0209371	0.0222102
11	66835000	66840000	11	66870000	66875000	.	.	.	.	0,0,0	19	8.71731	9.54444	9.19068	9.54065	9	9	9	9	0.033828	0.0407966	0.0811282	0.0835667
11	66855000	66860000	11	66890000	66895000	.	.	.	.	0,0,0	20	6.76961	8.17405	9.16901	6.4218	8	9	9	8	0.00365306	0.0239339	0.0479493	0.010513
11	67105000	67110000	11	67420000	67425000	.	.	.	.	0,0,0	13	1.75399	2.51333	2.71846	3.22846	2	4	4	5	0.000990835	0.0159952	0.0195784	0.0522406
11	67495000	67500000	11	67540000	67545000	.	.	.	.	0,0,0	15	4.23768	4.29786	3.98523	5.49667	6	6	6	7	0.0107279	0.0174153	0.0275802	0.0788116
11	67500000	67505000	11	67725000	67730000	.	.	.	.	0,0,0	11	2.5208	2.11695	1.67579	2.28474	4	3	2	3	0.0491346	0.0472408	0.0244088	0.0568751
11	67540000	67545000	11	67725000	67730000	.	.	.	.	0,0,0	14	2.79967	2.99026	3.05216	4.27027	4	4	4	6	0.00312035	0.00587831	0.00793464	0.0587062
11	67985000	67990000	11	68020000	68025000	.	.	.	.	0,0,0	30	6.89201	15.171	5.31944	7.48259	8	11	7	8	2.54925e-07	0.00450241	1.81033e-08	8.66373e-07
11	67985000	67990000	11	68050000	68055000	.	.	.	.	0,0,0	37	16.9231	14.7615	14.5259	20.7903	12	11	11	13	0.00139352	4.69472e-05	0.000112298	0.0547185
11	67985000	67990000	11	68105000	68110000	.	.	.	.	0,0,0	65	27.3287	29.2421	30.9406	36.7227	14	14	15	15	5.91583e-07	5.98484e-07	0.000776548	0.000596045
11	67985000	67990000	11	68195000	68200000	.	.	.	.	0,0,0	18	5.88993	5.5905	7.5301	6.14009	7	7	8	7	0.00326602	0.00597717	0.0405628	0.010062
11	67985000	67990000	11	68210000	68215000	.	.	.	.	0,0,0	22	7.94247	7.13826	9.48656	5.69505	9	8	9	7	0.0054492	0.00131262	0.0153007	0.000261144
11	67985000	67990000	11	68280000	68285000	.	.	.	.	0,0,0	11	1.53784	1.74616	2.43822	2.35179	1	2	3	3	0.0056938	0.0253787	0.0538051	0.0568751
11	67985000	67990000	11	68330000	68335000	.	.	.	.	0,0,0	22	5.16322	5.50865	6.29065	4.86547	7	7	8	6	9.34461e-05	0.000186378	0.00271474	2.69565e-05
11	67990000	67995000	11	68050000	68055000	.	.	.	.	0,0,0	65	21.3867	19.6783	19.9078	38.7589	13	13	13	15	3.10532e-10	3.12689e-10	1.15195e-09	0.000596045
11	67990000	67995000	11	68105000	68110000	.	.	.	.	0,0,0	103	32.8653	37.7761	51.2858	47.6225	15	15	17	16	2.1236e-15	1.0382e-15	1.45633e-05	8.33978e-10
11	67990000	67995000	11	68120000	68125000	.	.	.	.	0,0,0	49	21.8738	18.0768	25.3974	25.3521	13	12	14	14	6.2814e-05	3.47347e-07	0.00878481	0.00882035
11	67990000	67995000	11	68140000	68145000	.	.	.	.	0,0,0	115	65.6504	42.0458	69.665	50.9602	18	16	18	17	0.000183685	8.58423e-14	0.000642898	7.4489e-08
11	67990000	67995000	11	68195000	68200000	.	.	.	.	0,0,0	26	7.04272	7.44529	12.385	8.32869	8	8	11	9	1.93359e-05	4.27594e-05	0.0708907	0.000948172
11	68000000	68005000	11	68050000	68055000	.	.	.	.	0,0,0	25	7.85472	7.42557	8.43527	8.31793	9	8	9	9	0.000657915	0.000106803	0.00214828	0.00202776
11	68000000	68005000	11	68105000	68110000	.	.	.	.	0,0,0	48	11.4964	14.8103	21.7812	15.2556	10	11	13	11	2.64796e-12	2.76967e-09	0.000274883	7.55351e-09
11	68000000	68005000	11	68120000	68125000	.	.	.	.	0,0,0	20	7.36472	7.26523	7.948	8.53032	8	8	9	9	0.00365306	0.00552989	0.0479493	0.0503354
11	68010000	68015000	11	68140000	68145000	.	.	.	.	0,0,0	32	18.9298	16.726	17.0888	14.7548	12	12	12	11	0.0198601	0.0182033	0.0386574	0.00336471
11	68015000	68020000	11	68050000	68055000	.	.	.	.	0,0,0	52	7.07916	12.3397	7.49956	13.7488	8	10	8	11	1.07533e-21	3.99054e-14	2.13674e-21	9.53863e-11
11	68015000	68020000	11	68060000	68065000	.	.	.	.	0,0,0	17	5.03809	6.9108	7.38526	6.99766	7	8	8	8	0.00735115	0.0372598	0.0725713	0.0701872
11	68015000	68020000	11	68125000	68130000	.	.	.	.	0,0,0	34	14.8983	13.5483	13.3759	16.604	11	11	11	12	0.000299525	0.000391567	0.000880541	0.0168279
11	68015000	68020000	11	68135000	68140000	.	.	.	.	0,0,0	27	12.1089	10.3187	10.9395	11.0815	10	10	10	10	0.00183564	0.00243569	0.00512333	0.00579741
11	68020000	68025000	11	68105000	68110000	.	.	.	.	0,0,0	94	18.7913	29.6255	25.3318	45.7773	12	14	14	16	1.91361e-30	1.20685e-17	5.12645e-17	2.46105e-07
11	68020000	68025000	11	68125000	68130000	.	.	.	.	0,0,0	33	14.1762	14.47	11.6175	18.5157	11	11	10	12	0.000585825	0.000751241	6.45432e-05	0.0263629
11	68040000	68045000	11	68105000	68110000	.	.	.	.	0,0,0	30	11.0424	13.4064	10.1538	16.9033	10	11	10	12	0.000210039	0.00450241	0.000638216	0.0855084
11	68045000	68050000	11	68105000	68110000	.	.	.	.	0,0,0	55	17.9542	23.9689	20.4092	35.9293	12	13	13	15	1.27795e-09	9.51737e-07	3.19122e-06	0.0305411
11	68050000	68055000	11	68100000	68105000	.	.	.	.	0,0,0	31	12.6291	13.3723	17.0799	15.0052	11	11	12	11	0.00210759	0.00256187	0.0549939	0.00594302
11	68050000	68055000	11	68105000	68110000	.	.	.	.	0,0,0	109	30.4088	29.1172	20.6941	34.4028	14	14	13	15	4.5994e-25	1.60742e-24	6.85238e-32	1.13184e-17
11	68050000	68055000	11	68115000	68120000	.	.	.	.	0,0,0	28	6.75167	7.94874	8.72856	10.1227	8	9	9	10	2.43993e-06	9.23762e-05	0.00021104	0.00303266
11	68050000	68055000	11	68125000	68130000	.	.	.	.	0,0,0	40	12.3921	14.4797	15.482	17.8523	11	11	11	12	2.89359e-06	4.70879e-06	1.01265e-05	0.000650675
11	68060000	68065000	11	68105000	68110000	.	.	.	.	0,0,0	41	14.8946	17.1684	12.0078	21.43	11	12	10	13	1.28208e-06	0.000124006	3.68266e-08	0.0109561
11	68105000	68110000	11	68140000	68145000	.	.	.	.	0,0,0	87	46.2262	53.0554	53.5151	47.0541	16	17	17	16	4.40678e-06	0.00359629	0.00779197	1.1935e-05
11	68105000	68110000	11	68185000	68190000	.	.	.	.	0,0,0	30	13.5974	15.8426	14.5808	18.3439	11	12	11	12	0.00383566	0.0429895	0.0103142	0.0855084
11	68140000	68145000	11	68185000	68190000	.	.	.	.	0,0,0	47	17.9717	22.2431	28.5873	28.3339	12	13	14	14	1.39635e-06	0.000198643	0.0192441	0.0193417
11	68140000	68145000	11	68195000	68200000	.	.	.	.	0,0,0	41	12.4002	12.3555	20.9929	16.1728	11	10	13	12	1.28208e-06	1.92826e-08	0.0110692	0.00036115
11	68140000	68145000	11	68200000	68205000	.	.	.	.	0,0,0	23	12.0924	10.0582	10.6077	11.6157	10	10	10	10	0.0210034	0.0232949	0.0495526	0.051787
11	68150000	68155000	11	68185000	68190000	.	.	.	.	0,0,0	23	5.95645	8.5721	8.63525	6.83998	7	9	9	8	3.42638e-05	0.00412107	0.00841452	0.00108839
11	69425000	69430000	11	69460000	69465000	.	.	.	.	0,0,0	17	5.58868	6.87983	6.37506	2.96323	7	8	8	4	0.00735115	0.0372598	0.0725713	0.000174104
11	71915000	71920000	11	72010000	72015000	.	.	.	.	0,0,0	17	3.52937	4.47653	6.34617	6.22195	5	6	8	7	0.000427159	0.00372722	0.0725713	0.0222102
11	71965000	71970000	11	72010000	72015000	.	.	.	.	0,0,0	22	4.00878	5.66142	8.20683	8.18168	6	7	9	9	8.79751e-06	0.000186378	0.0153007	0.0160889
11	71965000	71970000	11	72260000	72265000	.	.	.	.	0,0,0	12	1.73543	2.68167	3.72845	2.43711	2	4	5	3	0.00370862	0.0353788	0.0986332	0.0224049
11	72140000	72145000	11	72235000	72240000	.	.	.	.	0,0,0	20	5.49989	7.354	9.19901	5.55714	7	8	9	7	0.000595801	0.00552989	0.0479493	0.00181023
11	72225000	72230000	11	72260000	72265000	.	.	.	.	0,0,0	17	3.27952	6.6336	5.92	4.6523	5	8	7	6	0.000427159	0.0372598	0.0209371	0.00571705
11	72225000	72230000	11	72270000	72275000	.	.	.	.	0,0,0	18	4.9602	5.13355	7.1551	7.75186	7	7	8	8	0.00326602	0.00597717	0.0405628	0.0395652
11	72235000	72240000	11	72270000	72275000	.	.	.	.	0,0,0	20	6.71746	7.56477	8.02804	7.29523	8	8	9	8	0.00365306	0.00552989	0.0479493	0.010513
11	72515000	72520000	11	72550000	72555000	.	.	.	.	0,0,0	14	1.80337	3.6189	4.21857	4.28389	2	5	6	6	0.000210062	0.0163433	0.0591247	0.0587062
11	73055000	73060000	11	73120000	73125000	.	.	.	.	0,0,0	15	3.43918	4.42572	5.88902	3.9044	5	6	7	5	0.00346019	0.0174153	0.0779212	0.00963794
11	73055000	73060000	11	73145000	73150000	.	.	.	.	0,0,0	24	5.82268	8.09783	9.56546	7.22439	7	9	9	8	1.10059e-05	0.00206957	0.00452125	0.000447412
11	73060000	73065000	11	73160000	73165000	.	.	.	.	0,0,0	15	2.63234	3.43822	4.42554	4.54901	4	5	6	6	0.000962873	0.00690573	0.0275802	0.0288497
11	73120000	73125000	11	73155000	73160000	.	.	.	.	0,0,0	33	9.89987	13.3977	9.96373	14.4758	10	11	10	11	1.86509e-05	0.000751241	6.45432e-05	0.00180921
11	73975000	73980000	11	74135000	74140000	.	.	.	.	0,0,0	18	5.04567	3.90385	3.99488	2.10572	7	5	6	3	0.00326602	0.00032402	0.00223808	7.35248e-06
11	74115000	74120000	11	74450000	74455000	.	.	.	.	0,0,0	14	2.21594	2.55779	1.86607	4.84529	3	4	2	6	0.000848655	0.00587831	0.000500297	0.0587062
11	74500000	74505000	11	74665000	74670000	.	.	.	.	0,0,0	25	3.08795	4.2222	4.44999	5.56002	4	6	6	7	3.42763e-10	4.47046e-07	4.53679e-07	1.20295e-05
11	74665000	74670000	11	74780000	74785000	.	.	.	.	0,0,0	20	4.07283	4.95819	2.69742	6.09474	6	6	4	7	8.77235e-05	0.000185581	2.32956e-06	0.00181023
11	77925000	77930000	11	78515000	78520000	.	.	.	.	0,0,0	16	5.6847	4.52924	5.42194	3.21934	7	6	7	5	0.0151448	0.00815994	0.0419077	0.0035613
11	77935000	77940000	11	78115000	78120000	.	.	.	.	0,0,0	16	4.94065	3.55725	4.43384	3.34849	6	5	6	5	0.00461177	0.00256764	0.0124265	0.0035613
11	77945000	77950000	11	78000000	78005000	.	.	.	.	0,0,0	22	9.80376	10.3379	7.95603	11.6893	9	10	9	10	0.0054492	0.0377448	0.0153007	0.0805399
11	77965000	77970000	11	78000000	78005000	.	.	.	.	0,0,0	40	12.766	16.8243	18.6906	15.2521	11	12	12	11	2.89359e-06	0.000233978	0.000608558	1.19731e-05
11	77970000	77975000	11	78105000	78110000	.	.	.	.	0,0,0	19	4.55176	5.39797	5.27691	8.27249	6	7	7	9	0.000269132	0.0027782	0.00440181	0.0835667
11	77990000	77995000	11	78105000	78110000	.	.	.	.	0,0,0	25	6.87428	7.41281	6.19934	12.0348	8	8	7	10	5.23604e-05	0.000106803	1.16326e-05	0.0189756
11	78000000	78005000	11	78115000	78120000	.	.	.	.	0,0,0	26	10.5507	10.2204	9.11089	12.601	10	10	9	11	0.00350961	0.00450532	0.00104429	0.0691806
11	78105000	78110000	11	78200000	78205000	.	.	.	.	0,0,0	17	4.08486	5.34266	5.23436	5.0188	6	7	7	7	0.00197485	0.0124709	0.0209371	0.0222102
11	78105000	78110000	11	78515000	78520000	.	.	.	.	0,0,0	15	4.60714	4.2431	3.35292	1.9399	6	6	5	2	0.0107279	0.0174153	0.00832192	0.000110848
11	78515000	78520000	11	78560000	78565000	.	.	.	.	0,0,0	15	5.60725	5.84008	5.16113	4.9509	7	7	7	6	0.0291065	0.0443084	0.0779212	0.0288497
11	78515000	78520000	11	78595000	78600000	.	.	.	.	0,0,0	22	7.46177	8.87791	9.85392	9.40094	8	9	10	9	0.000735879	0.00767982	0.0787497	0.0160889
11	78515000	78520000	11	78625000	78630000	.	.	.	.	0,0,0	31	9.20504	8.56511	7.33363	10.9808	9	9	8	10	3.29237e-06	6.09248e-06	3.46725e-07	0.000368122
11	78515000	78520000	11	78630000	78635000	.	.	.	.	0,0,0	16	4.19419	3.65246	3.27433	4.36492	6	5	5	6	0.00461177	0.00256764	0.00314124	0.0132102
11	81510000	81515000	11	81550000	81555000	.	.	.	.	0,0,0	71	11.2861	19.0684	24.7213	23.5239	10	12	14	13	1.10335e-26	7.67121e-17	2.16107e-08	4.36399e-12
11	81515000	81520000	11	81550000	81555000	.	.	.	.	0,0,0	28	7.54909	14.3165	7.56861	10.4701	8	11	8	10	2.43993e-06	0.013347	1.12735e-05	0.00303266
11	85090000	85095000	11	85155000	85160000	.	.	.	.	0,0,0	16	3.4777	4.70553	4.9335	5.5669	5	6	6	7	0.00124328	0.00815994	0.0124265	0.0437082
11	85740000	85745000	11	85775000	85780000	.	.	.	.	0,0,0	15	5.7083	5.60779	5.07268	5.31091	7	7	7	7	0.0291065	0.0443084	0.0779212	0.0788116
11	86570000	86575000	11	86790000	86795000	.	.	.	.	0,0,0	15	5.79275	4.78772	4.0978	3.28654	7	6	6	5	0.0291065	0.0174153	0.0275802	0.00963794
11	86790000	86795000	11	86925000	86930000	.	.	.	.	0,0,0	31	14.7012	15.0942	17.8839	13.6458	11	11	12	11	0.00210759	0.00256187	0.0549939	0.00594302
11	86790000	86795000	11	87075000	87080000	.	.	.	.	0,0,0	23	8.24651	6.54523	6.97446	7.59307	9	8	8	8	0.00280214	0.000599721	0.00126515	0.00108839
11	86790000	86795000	11	87090000	87095000	.	.	.	.	0,0,0	49	23.8958	14.1999	19.7829	18.0484	13	11	13	12	6.2814e-05	9.85594e-10	0.000154891	1.00376e-06
11	86790000	86795000	11	87095000	87100000	.	.	.	.	0,0,0	55	25.3077	14.3129	20.779	15.2901	14	11	13	11	0.000256528	1.51055e-12	3.19122e-06	4.09619e-12
11	86790000	86795000	11	87155000	87160000	.	.	.	.	0,0,0	24	7.83478	5.32111	5.07416	4.35419	8	7	7	6	0.000133047	2.39246e-05	3.42544e-05	2.27628e-06
11	86900000	86905000	11	87090000	87095000	.	.	.	.	0,0,0	17	4.12377	4.42466	2.63366	7.73621	6	6	4	8	0.00197485	0.00372722	0.000176244	0.0701872
11	86925000	86930000	11	87155000	87160000	.	.	.	.	0,0,0	17	5.62326	3.66085	3.48289	6.26386	7	5	5	8	0.00735115	0.000994097	0.00113376	0.0701872
11	87120000	87125000	11	87155000	87160000	.	.	.	.	0,0,0	26	6.54407	10.3112	8.11791	7.27487	8	10	9	8	1.93359e-05	0.00450532	0.00104429	6.84484e-05
11	86790000	86795000	11	87475000	87480000	.	.	.	.	0,0,0	12	1.88911	2.61973	2.71623	2.50355	2	4	4	4	0.00370862	0.0353788	0.0483231	0.0489862
11	87120000	87125000	11	87615000	87620000	.	.	.	.	0,0,0	12	2.74264	2.23875	2.11642	2.73721	4	3	3	4	0.0209391	0.0201631	0.0224015	0.0489862
11	87365000	87370000	11	87475000	87480000	.	.	.	.	0,0,0	12	3.43701	3.33319	3.73269	2.83895	5	5	5	4	0.0434891	0.0690511	0.0986332	0.0489862
11	87475000	87480000	11	87525000	87530000	.	.	.	.	0,0,0	21	8.0913	6.87654	7.3797	6.98018	9	8	8	8	0.0104689	0.00266206	0.00581603	0.00508086
11	87475000	87480000	11	87615000	87620000	.	.	.	.	0,0,0	29	9.88712	9.27739	10.2495	7.2813	10	9	10	8	0.000436949	3.74098e-05	0.00133429	2.93172e-06
11	88210000	88215000	11	88325000	88330000	.	.	.	.	0,0,0	21	6.95187	6.16847	9.19895	7.4855	8	7	9	8	0.00167172	0.000498246	0.0277717	0.00508086
11	88210000	88215000	11	88330000	88335000	.	.	.	.	0,0,0	19	7.4455	5.96495	8.59116	6.37317	8	7	9	8	0.00762887	0.0027782	0.0811282	0.0214388
11	88210000	88215000	11	88385000	88390000	.	.	.	.	0,0,0	26	6.15219	7.76065	14.8146	7.99623	7	8	11	9	1.07353e-06	4.27594e-05	0.0708907	0.000948172
11	88210000	88215000	11	88435000	88440000	.	.	.	.	0,0,0	30	9.84591	9.21507	13.9607	7.26553	9	9	11	8	8.73644e-06	1.58798e-05	0.0103142	8.66373e-07
11	88210000	88215000	11	88595000	88600000	.	.	.	.	0,0,0	15	6.28094	5.25521	6.23047	3.76191	8	7	7	5	0.0866935	0.0443084	0.0779212	0.00963794
11	88215000	88220000	11	88325000	88330000	.	.	.	.	0,0,0	20	5.42932	4.91679	8.6332	5.24313	7	6	9	7	0.000595801	0.000185581	0.0479493	0.00181023
11	88215000	88220000	11	88435000	88440000	.	.	.	.	0,0,0	24	7.48879	7.07572	11.2355	4.98502	8	8	10	7	0.000133047	0.000255271	0.0294512	3.59681e-05
11	88295000	88300000	11	88435000	88440000	.	.	.	.	0,0,0	18	5.53976	5.32808	5.27614	7.46036	7	7	7	8	0.00326602	0.00597717	0.00955531	0.0395652
11	88385000	88390000	11	88435000	88440000	.	.	.	.	0,0,0	60	10.8466	15.9952	19.9321	20.5882	10	12	13	13	2.82122e-19	1.80845e-11	7.83624e-08	8.10553e-08
11	88435000	88440000	11	88480000	88485000	.	.	.	.	0,0,0	19	6.36475	7.97118	7.36027	8.89101	8	9	8	9	0.00762887	0.0407966	0.0225188	0.0835667
11	88530000	88535000	11	88570000	88575000	.	.	.	.	0,0,0	14	2.9491	4.22762	4.945	4.46553	4	6	6	6	0.00312035	0.0356873	0.0591247	0.0587062
11	89530000	89535000	11	89625000	89630000	.	.	.	.	0,0,0	15	3.748	4.18562	5.33988	5.12539	5	6	7	7	0.00346019	0.0174153	0.0779212	0.0788116
11	92575000	92580000	11	92725000	92730000	.	.	.	.	0,0,0	12	2.5173	2.60969	3.62561	2.71018	4	4	5	4	0.0209391	0.0353788	0.0986332	0.0489862
11	92580000	92585000	11	93510000	93515000	.	.	.	.	0,0,0	15	2.64189	1.88003	2.32311	1.94144	4	2	3	2	0.000962873	7.64417e-05	0.000626702	0.000110848
11	92595000	92600000	11	92725000	92730000	.	.	.	.	0,0,0	14	2.99821	3.35734	3.9449	3.67128	4	5	5	5	0.00312035	0.0163433	0.0211163	0.0239566
11	93500000	93505000	11	93575000	93580000	.	.	.	.	0,0,0	39	15.2039	14.9093	16.7172	12.5473	11	11	12	11	6.55908e-06	1.06053e-05	0.00104077	2.46565e-05
11	93510000	93515000	11	93575000	93580000	.	.	.	.	0,0,0	48	14.4053	15.0576	26.7322	9.02725	11	11	14	9	1.53172e-09	2.76967e-09	0.0132258	9.75058e-15
11	93575000	93580000	11	93610000	93615000	.	.	.	.	0,0,0	22	3.74651	9.23703	8.76214	6.16249	5	9	9	7	5.97413e-07	0.00767982	0.0153007	0.000261144
11	95290000	95295000	11	95360000	95365000	.	.	.	.	0,0,0	17	2.85242	2.43952	3.27525	3.55701	4	3	5	5	7.70591e-05	2.89054e-05	0.00113376	0.00138412
11	95295000	95300000	11	95360000	95365000	.	.	.	.	0,0,0	14	1.94089	1.56986	1.76171	1.61941	2	1	2	2	0.000210062	6.19824e-05	0.000500297	0.000542969
11	95550000	95555000	11	95590000	95595000	.	.	.	.	0,0,0	17	3.31239	4.95778	3.97533	4.3279	5	6	6	6	0.000427159	0.00372722	0.00586356	0.00571705
11	96020000	96025000	11	96055000	96060000	.	.	.	.	0,0,0	21	5.98816	5.73568	2.53107	8.80925	7	7	4	9	0.000236683	0.000498246	5.49096e-07	0.029154
11	96055000	96060000	11	96145000	96150000	.	.	.	.	0,0,0	22	2.02242	3.79842	6.25332	4.96576	3	5	8	7	1.53569e-09	1.76596e-06	0.00271474	0.000261144
11	97955000	97960000	11	98000000	98005000	.	.	.	.	0,0,0	19	6.85385	6.03753	5.77899	7.2817	8	7	7	8	0.00762887	0.0027782	0.00440181	0.0214388
11	97960000	97965000	11	97995000	98000000	.	.	.	.	0,0,0	23	3.34291	7.08866	6.20039	5.06222	5	8	7	7	1.36611e-07	0.000599721	0.000100436	0.000103363
11	97960000	97965000	11	98000000	98005000	.	.	.	.	0,0,0	33	11.65	11.573	15.616	12.267	10	10	12	10	1.86509e-05	3.12467e-05	0.0248815	8.02338e-05
11	98000000	98005000	11	98255000	98260000	.	.	.	.	0,0,0	45	13.7861	15.2397	21.6688	20.0923	11	11	13	13	3.11734e-08	5.52855e-08	0.00158353	0.00164863
11	98015000	98020000	11	98150000	98155000	.	.	.	.	0,0,0	17	5.05872	5.47123	6.78411	4.34607	7	7	8	6	0.00735115	0.0124709	0.0725713	0.00571705
11	98015000	98020000	11	98255000	98260000	.	.	.	.	0,0,0	17	5.22437	6.38235	7.77053	6.90368	7	8	8	8	0.00735115	0.0372598	0.0725713	0.0701872
11	98150000	98155000	11	98210000	98215000	.	.	.	.	0,0,0	31	11.5645	11.9289	14.0918	12.2124	10	10	11	10	9.8328e-05	0.000147501	0.00590373	0.000368122
11	98190000	98195000	11	98225000	98230000	.	.	.	.	0,0,0	26	6.73235	9.64204	9.34102	8.70614	8	9	9	9	1.93359e-05	0.00045167	0.00104429	0.000948172
11	98190000	98195000	11	98255000	98260000	.	.	.	.	0,0,0	62	24.2491	29.7464	35.9537	22.5859	13	14	15	13	3.90262e-09	4.41551e-06	0.00267826	1.62388e-08
11	98255000	98260000	11	98500000	98505000	.	.	.	.	0,0,0	13	3.62819	3.30293	2.5263	3.09498	5	5	4	4	0.0201229	0.0350944	0.0195784	0.0198157
11	98275000	98280000	11	98330000	98335000	.	.	.	.	0,0,0	28	6.75863	8.81248	9.71119	15.1403	8	9	9	11	2.43993e-06	9.23762e-05	0.00021104	0.0287996
11	98275000	98280000	11	98375000	98380000	.	.	.	.	0,0,0	15	4.84485	5.1926	4.25132	5.57678	6	7	6	7	0.0107279	0.0443084	0.0275802	0.0788116
11	98360000	98365000	11	98420000	98425000	.	.	.	.	0,0,0	15	3.17314	3.96837	4.3782	2.08527	5	6	6	3	0.00346019	0.0174153	0.0275802	0.000640135
11	99095000	99100000	11	99175000	99180000	.	.	.	.	0,0,0	23	6.59972	6.87685	7.89552	7.31356	8	8	9	8	0.000326575	0.000599721	0.00841452	0.00108839
11	99095000	99100000	11	99240000	99245000	.	.	.	.	0,0,0	27	11.2784	9.32553	12.3422	10.8567	10	9	10	10	0.00183564	0.000208112	0.00512333	0.00579741
11	99095000	99100000	11	99315000	99320000	.	.	.	.	0,0,0	28	6.45619	6.91193	12.3697	9.01575	8	8	10	9	2.43993e-06	5.47935e-06	0.00269227	0.000187249
11	99175000	99180000	11	99230000	99235000	.	.	.	.	0,0,0	27	6.96803	9.4383	6.99831	14.1089	8	9	8	11	6.8662e-06	0.000208112	2.88206e-05	0.0456097
11	99175000	99180000	11	99510000	99515000	.	.	.	.	0,0,0	16	5.54911	4.6926	3.79693	5.87938	7	6	5	7	0.0151448	0.00815994	0.00314124	0.0437082
11	99230000	99235000	11	99315000	99320000	.	.	.	.	0,0,0	30	14.9858	15.6734	19.3247	18.6681	11	12	12	12	0.00383566	0.0429895	0.0799876	0.0855084
11	99240000	99245000	11	99315000	99320000	.	.	.	.	0,0,0	80	20.1257	22.3846	37.6465	26.0861	13	13	15	14	1.57343e-16	9.17834e-17	1.77211e-07	1.68815e-11
11	99240000	99245000	11	99375000	99380000	.	.	.	.	0,0,0	31	11.523	11.2978	17.6844	12.8202	10	10	12	11	9.8328e-05	0.000147501	0.0549939	0.00594302
11	99250000	99255000	11	99315000	99320000	.	.	.	.	0,0,0	19	3.86443	5.80828	9.45866	6.08754	5	7	9	7	3.76889e-05	0.0027782	0.0811282	0.00453518
11	99260000	99265000	11	99315000	99320000	.	.	.	.	0,0,0	20	6.95998	8.79168	7.69112	8.99481	8	9	8	9	0.00365306	0.0239339	0.0117797	0.0503354
11	99310000	99315000	11	99345000	99350000	.	.	.	.	0,0,0	16	1.86682	6.45584	2.42061	4.75472	2	8	3	6	6.88078e-06	0.0650454	0.000151215	0.0132102
11	99315000	99320000	11	99350000	99355000	.	.	.	.	0,0,0	46	9.33008	13.6867	14.7968	16.2355	9	11	11	12	3.97884e-14	2.07521e-08	5.19485e-08	1.06857e-05
11	99345000	99350000	11	99385000	99390000	.	.	.	.	0,0,0	17	4.20159	5.13221	6.03032	5.85909	6	7	7	7	0.00197485	0.0124709	0.0209371	0.0222102
11	99765000	99770000	11	99855000	99860000	.	.	.	.	0,0,0	14	2.48143	3.35461	3.44381	3.04626	3	5	5	4	0.000848655	0.0163433	0.0211163	0.00726851
11	99790000	99795000	11	99875000	99880000	.	.	.	.	0,0,0	20	5.58971	7.18627	7.58677	7.94941	7	8	8	9	0.000595801	0.00552989	0.0117797	0.0503354
11	101190000	101195000	11	101250000	101255000	.	.	.	.	0,0,0	13	2.65016	2.80682	3.06181	2.23218	4	4	4	3	0.00846838	0.0159952	0.0195784	0.00750925
11	101235000	101240000	11	101270000	101275000	.	.	.	.	0,0,0	28	6.47493	10.5556	13.2205	7.25022	8	10	11	8	2.43993e-06	0.00124135	0.0287076	9.32257e-06
11	103070000	103075000	11	103240000	103245000	.	.	.	.	0,0,0	13	3.54215	3.92338	3.82221	2.79218	5	5	5	4	0.0201229	0.0350944	0.0486373	0.0198157
11	103240000	103245000	11	103300000	103305000	.	.	.	.	0,0,0	21	4.21242	4.07944	5.54285	5.5426	6	6	7	7	2.79519e-05	5.8423e-05	0.000729734	0.000745968
11	103240000	103245000	11	103390000	103395000	.	.	.	.	0,0,0	33	2.1467	3.00738	7.28334	6.6655	3	4	8	8	1.9897e-20	1.20594e-17	3.46829e-08	2.38525e-08
11	103240000	103245000	11	103395000	103400000	.	.	.	.	0,0,0	22	2.45859	2.86422	5.26411	6.45616	3	4	7	8	1.53569e-09	6.84155e-08	0.0002794	0.00247951
11	103335000	103340000	11	103390000	103395000	.	.	.	.	0,0,0	33	12.4621	9.80606	6.76313	3.98116	11	9	8	6	0.000585825	7.80281e-07	3.46829e-08	2.04933e-12
11	103335000	103340000	11	103395000	103400000	.	.	.	.	0,0,0	36	7.73803	7.42793	5.72046	7.61544	8	8	7	8	2.06796e-10	5.71047e-10	2.43839e-12	8.09649e-10
11	103335000	103340000	11	103450000	103455000	.	.	.	.	0,0,0	28	2.21031	4.59526	6.01233	4.97137	3	6	7	7	3.39314e-15	5.07554e-09	2.51058e-07	2.58436e-07
11	103390000	103395000	11	103450000	103455000	.	.	.	.	0,0,0	54	10.6061	8.90598	9.81478	9.47011	10	9	9	9	1.40342e-15	5.57369e-19	1.42402e-18	1.42651e-18
11	103390000	103395000	11	103455000	103460000	.	.	.	.	0,0,0	39	5.99017	6.9586	10.5219	14.584	7	8	10	11	6.62295e-15	9.58158e-12	2.78164e-07	2.46565e-05
11	103395000	103400000	11	103450000	103455000	.	.	.	.	0,0,0	54	5.97402	7.84881	15.4214	11.3963	7	9	11	10	5.51069e-27	5.57369e-19	1.06259e-11	4.8673e-15
11	103395000	103400000	11	103455000	103460000	.	.	.	.	0,0,0	37	6.33753	6.93508	10.0329	11.9711	8	8	10	10	5.24704e-11	1.49845e-10	1.89428e-06	2.23704e-06
12	1035000	1040000	12	1095000	1100000	.	.	.	.	0,0,0	27	11.1557	9.69941	11.4202	8.4161	10	9	10	9	0.00183564	0.000208112	0.00512333	0.000441327
12	1035000	1040000	12	1125000	1130000	.	.	.	.	0,0,0	29	5.20239	7.03811	8.02145	3.57493	7	8	9	5	2.75115e-08	1.86671e-06	9.31885e-05	2.35511e-11
12	1040000	1045000	12	1105000	1110000	.	.	.	.	0,0,0	16	3.15825	3.45052	5.05543	1.94974	5	5	7	2	0.00124328	0.00256764	0.0419077	1.77855e-05
12	1095000	1100000	12	1175000	1180000	.	.	.	.	0,0,0	22	4.28752	4.24887	3.47424	7.7131	6	6	5	8	8.79751e-06	1.75017e-05	1.74626e-06	0.00247951
12	2650000	2655000	12	2685000	2690000	.	.	.	.	0,0,0	35	14.7799	10.6452	10.1908	15.1218	11	10	10	11	0.000148622	5.73657e-06	1.20937e-05	0.000480434
12	2650000	2655000	12	2690000	2695000	.	.	.	.	0,0,0	26	11.118	9.95718	14.0554	7.93319	10	10	11	9	0.00350961	0.00450532	0.0708907	0.000948172
12	7220000	7225000	12	7270000	7275000	.	.	.	.	0,0,0	24	7.20498	7.03955	9.65478	7.92044	8	8	9	9	0.000133047	0.000255271	0.00452125	0.00427756
12	10060000	10065000	12	10095000	10100000	.	.	.	.	0,0,0	16	2.67269	4.95117	3.48705	3.91645	4	6	5	5	0.000268037	0.00815994	0.00314124	0.0035613
12	10080000	10085000	12	10125000	10130000	.	.	.	.	0,0,0	22	4.15383	6.27982	6.85485	5.67546	6	8	8	7	8.79751e-06	0.00131262	0.00271474	0.000261144
12	10080000	10085000	12	10130000	10135000	.	.	.	.	0,0,0	18	3.72105	4.24939	5.03068	3.18243	5	6	7	5	0.000129896	0.00136262	0.00955531	0.000390363
12	10080000	10085000	12	10140000	10145000	.	.	.	.	0,0,0	17	3.58807	5.07981	7.7566	5.49895	5	7	8	7	0.000427159	0.0124709	0.0725713	0.0222102
12	10185000	10190000	12	10245000	10250000	.	.	.	.	0,0,0	22	7.05812	6.65224	7.01815	9.09654	8	8	8	9	0.000735879	0.00131262	0.00271474	0.0160889
12	10225000	10230000	12	10300000	10305000	.	.	.	.	0,0,0	17	2.95144	3.57072	4.46886	4.47097	4	5	6	6	7.70591e-05	0.000994097	0.00586356	0.00571705
12	10300000	10305000	12	10340000	10345000	.	.	.	.	0,0,0	14	3.45733	3.40465	4.03669	4.88849	5	5	6	6	0.00871876	0.0163433	0.0591247	0.0587062
12	10300000	10305000	12	10345000	10350000	.	.	.	.	0,0,0	37	9.16175	7.98875	10.2836	6.82505	9	9	10	8	5.13375e-09	1.02993e-08	1.89428e-06	2.12455e-10
12	10700000	10705000	12	10745000	10750000	.	.	.	.	0,0,0	17	3.11872	3.6511	4.22082	6.38308	4	5	6	8	7.70591e-05	0.000994097	0.00586356	0.0701872
12	10700000	10705000	12	10750000	10755000	.	.	.	.	0,0,0	29	7.15043	8.76016	9.27133	11.983	8	9	9	10	8.33648e-07	3.74098e-05	9.31885e-05	0.00154329
12	10715000	10720000	12	10750000	10755000	.	.	.	.	0,0,0	21	4.21918	6.52126	6.95634	7.24456	6	8	8	8	2.79519e-05	0.00266206	0.00581603	0.00508086
12	11485000	11490000	12	11670000	11675000	.	.	.	.	0,0,0	14	2.92711	2.64486	2.83336	3.62573	4	4	4	5	0.00312035	0.00587831	0.00793464	0.0239566
12	11510000	11515000	12	11545000	11550000	.	.	.	.	0,0,0	20	6.71559	8.44679	6.88827	9.81076	8	9	8	9	0.00365306	0.0239339	0.0117797	0.0503354
12	16485000	16490000	12	17010000	17015000	.	.	.	.	0,0,0	12	2.04461	2.19503	2.55458	2.71595	3	3	4	4	0.00902681	0.0201631	0.0483231	0.0489862
12	16960000	16965000	12	17010000	17015000	.	.	.	.	0,0,0	39	8.96568	10.5892	8.54667	22.9811	9	10	9	13	4.59177e-10	1.34465e-07	3.12015e-09	0.0253346
12	16965000	16970000	12	17010000	17015000	.	.	.	.	0,0,0	60	11.8368	12.7308	8.25583	19.4481	10	11	9	12	2.82122e-19	7.31806e-15	1.21622e-22	4.32672e-11
12	16965000	16970000	12	17015000	17020000	.	.	.	.	0,0,0	33	7.42893	8.04841	11.9824	9.44939	8	9	10	9	8.53328e-09	7.80281e-07	6.45432e-05	1.79733e-06
12	31440000	31445000	12	31480000	31485000	.	.	.	.	0,0,0	37	9.96663	12.7005	22.9279	13.766	10	11	13	11	4.93615e-07	4.69472e-05	0.05285	0.000110166
12	31440000	31445000	12	31515000	31520000	.	.	.	.	0,0,0	23	5.38819	7.06761	9.85625	10.2003	7	8	10	10	3.42638e-05	0.000599721	0.0495526	0.051787
12	31475000	31480000	12	31510000	31515000	.	.	.	.	0,0,0	14	4.25313	4.8573	3.86366	4.92085	6	6	5	6	0.0228825	0.0356873	0.0211163	0.0587062
12	31480000	31485000	12	31515000	31520000	.	.	.	.	0,0,0	34	7.50578	14.4449	11.7469	12.9062	8	11	10	11	2.389e-09	0.000391567	2.77784e-05	0.000899618
12	32770000	32775000	12	33155000	33160000	.	.	.	.	0,0,0	17	4.17916	4.15265	7.16949	4.00863	6	6	8	6	0.00197485	0.00372722	0.0725713	0.00571705
12	33620000	33625000	12	33655000	33660000	.	.	.	.	0,0,0	18	4.32206	5.8327	6.25896	4.77164	6	7	8	6	0.000711911	0.00597717	0.0405628	0.00212992
12	33895000	33900000	12	33930000	33935000	.	.	.	.	0,0,0	22	5.13656	8.329	9.13839	6.90825	7	9	9	8	9.34461e-05	0.00767982	0.0153007	0.00247951
12	33915000	33920000	12	33980000	33985000	.	.	.	.	0,0,0	22	6.84467	7.27296	8.47816	9.89564	8	8	9	10	0.000735879	0.00131262	0.0153007	0.0805399
12	33920000	33925000	12	33980000	33985000	.	.	.	.	0,0,0	22	7.07496	7.09043	6.8617	6.40825	8	8	8	8	0.000735879	0.00131262	0.00271474	0.00247951
12	33930000	33935000	12	33970000	33975000	.	.	.	.	0,0,0	15	3.46688	5.48112	6.2017	5.72096	5	7	7	7	0.00346019	0.0443084	0.0779212	0.0788116
12	34025000	34030000	12	34105000	34110000	.	.	.	.	0,0,0	19	6.0629	6.42694	9.02613	5.6926	7	8	9	7	0.00143139	0.0110845	0.0811282	0.00453518
12	34025000	34030000	12	34150000	34155000	.	.	.	.	0,0,0	21	5.29449	6.52982	9.12544	6.19607	7	8	9	7	0.000236683	0.00266206	0.0277717	0.000745968
12	34025000	34030000	12	34220000	34225000	.	.	.	.	0,0,0	21	4.47853	5.03765	6.7213	5.50472	6	7	8	7	2.79519e-05	0.000498246	0.00581603	0.000745968
12	34175000	34180000	12	34210000	34215000	.	.	.	.	0,0,0	17	4.45911	7.34896	7.21445	4.11812	6	8	8	6	0.00197485	0.0372598	0.0725713	0.00571705
12	44360000	44365000	12	44425000	44430000	.	.	.	.	0,0,0	10	1.34215	1.53165	1.86983	1.4111	1	1	2	1	0.0196098	0.0333707	0.068945	0.029624
12	50820000	50825000	12	50920000	50925000	.	.	.	.	0,0,0	15	3.76251	4.767	5.36354	4.15098	5	6	7	6	0.00346019	0.0174153	0.0779212	0.0288497
12	50820000	50825000	12	51215000	51220000	.	.	.	.	0,0,0	15	3.34835	4.14314	5.70933	5.37206	5	6	7	7	0.00346019	0.0174153	0.0779212	0.0788116
12	51095000	51100000	12	51135000	51140000	.	.	.	.	0,0,0	35	9.215	9.25591	15.5041	8.97732	9	9	11	9	5.13126e-08	9.61738e-08	0.000461986	2.44849e-07
12	51095000	51100000	12	51225000	51230000	.	.	.	.	0,0,0	21	3.41621	3.51567	4.73459	4.85311	5	5	6	6	2.62742e-06	6.43377e-06	8.29506e-05	8.12278e-05
12	51100000	51105000	12	51180000	51185000	.	.	.	.	0,0,0	17	3.26298	5.11047	7.25141	5.03506	5	7	8	7	0.000427159	0.0124709	0.0725713	0.0222102
12	51100000	51105000	12	51195000	51200000	.	.	.	.	0,0,0	19	4.50149	6.4976	8.77055	7.40396	6	8	9	8	0.000269132	0.0110845	0.0811282	0.0214388
12	51160000	51165000	12	51195000	51200000	.	.	.	.	0,0,0	16	2.89614	6.12274	3.66881	4.26382	4	7	5	6	0.000268037	0.0236047	0.00314124	0.0132102
12	56490000	56495000	12	56610000	56615000	.	.	.	.	0,0,0	17	5.68829	5.81004	6.37737	7.59786	7	7	8	8	0.00735115	0.0124709	0.0725713	0.0701872
12	56505000	56510000	12	56610000	56615000	.	.	.	.	0,0,0	19	6.97541	7.49932	8.12774	8.68322	8	8	9	9	0.00762887	0.0110845	0.0811282	0.0835667
12	56545000	56550000	12	56610000	56615000	.	.	.	.	0,0,0	27	9.93862	10.5012	10.5008	10.9426	10	10	10	10	0.00183564	0.00243569	0.00512333	0.00579741
12	62000000	62005000	12	62045000	62050000	.	.	.	.	0,0,0	20	6.25047	4.99794	3.12893	3.49973	8	7	4	5	0.00365306	0.00125312	2.32956e-06	3.10196e-05
12	65590000	65595000	12	65655000	65660000	.	.	.	.	0,0,0	12	3.12458	3.59827	2.30434	2.89985	4	5	3	4	0.0209391	0.0690511	0.0224015	0.0489862
12	65590000	65595000	12	65710000	65715000	.	.	.	.	0,0,0	13	2.43998	3.11924	2.79959	3.44303	3	4	4	5	0.00279279	0.0159952	0.0195784	0.0522406
12	66605000	66610000	12	67160000	67165000	.	.	.	.	0,0,0	12	1.69045	2.19955	3.15712	2.2448	2	3	5	3	0.00370862	0.0201631	0.0986332	0.0224049
12	66980000	66985000	12	67025000	67030000	.	.	.	.	0,0,0	17	5.52052	6.56388	7.11006	6.62473	7	8	8	8	0.00735115	0.0372598	0.0725713	0.0701872
12	67020000	67025000	12	67070000	67075000	.	.	.	.	0,0,0	29	6.36248	9.20617	12.4089	12.9349	8	9	11	11	8.33648e-07	3.74098e-05	0.0173458	0.0178204
12	67020000	67025000	12	67170000	67175000	.	.	.	.	0,0,0	18	5.07546	4.68515	6.25729	4.80399	7	6	8	6	0.00326602	0.00136262	0.0405628	0.00212992
12	67030000	67035000	12	67065000	67070000	.	.	.	.	0,0,0	20	5.42799	7.6585	8.25049	6.66265	7	8	9	8	0.000595801	0.00552989	0.0479493	0.010513
12	67030000	67035000	12	67070000	67075000	.	.	.	.	0,0,0	17	4.86327	6.02841	6.16545	5.65861	6	7	7	7	0.00197485	0.0124709	0.0209371	0.0222102
12	67185000	67190000	12	67400000	67405000	.	.	.	.	0,0,0	20	5.02989	4.98864	5.60352	8.26643	7	7	7	9	0.000595801	0.00125312	0.00186628	0.0503354
12	67720000	67725000	12	67800000	67805000	.	.	.	.	0,0,0	17	7.01097	6.9481	5.94394	6.46301	8	8	7	8	0.0279685	0.0372598	0.0209371	0.0701872
12	67800000	67805000	12	67860000	67865000	.	.	.	.	0,0,0	29	8.3454	9.18392	9.5977	8.46067	9	9	9	9	2.20184e-05	3.74098e-05	9.31885e-05	7.83373e-05
12	68515000	68520000	12	68555000	68560000	.	.	.	.	0,0,0	20	5.61234	6.79118	6.66522	7.47503	7	8	8	8	0.000595801	0.00552989	0.0117797	0.010513
12	68535000	68540000	12	68620000	68625000	.	.	.	.	0,0,0	25	6.67969	7.77074	10.7268	9.71048	8	8	10	9	5.23604e-05	0.000106803	0.0174733	0.00202776
12	68535000	68540000	12	68655000	68660000	.	.	.	.	0,0,0	32	14.0837	14.2498	19.0201	8.03941	11	11	12	9	0.00114759	0.00145406	0.0386574	4.61687e-06
12	68585000	68590000	12	68620000	68625000	.	.	.	.	0,0,0	15	2.41759	4.47512	4.42199	2.59547	3	6	6	4	0.00020407	0.0174153	0.0275802	0.00248769
12	69960000	69965000	12	70070000	70075000	.	.	.	.	0,0,0	16	4.38909	5.37129	5.28225	5.33472	6	7	7	7	0.00461177	0.0236047	0.0419077	0.0437082
12	69970000	69975000	12	70065000	70070000	.	.	.	.	0,0,0	16	3.58058	4.26469	4.58957	5.73581	5	6	6	7	0.00124328	0.00815994	0.0124265	0.0437082
12	70015000	70020000	12	70070000	70075000	.	.	.	.	0,0,0	26	8.52228	8.50924	11.0354	7.10003	9	9	10	8	0.000299597	0.00045167	0.0097313	6.84484e-05
12	70015000	70020000	12	70295000	70300000	.	.	.	.	0,0,0	13	2.52999	2.95395	3.63845	2.31719	4	4	5	3	0.00846838	0.0159952	0.0486373	0.00750925
12	70150000	70155000	12	70185000	70190000	.	.	.	.	0,0,0	28	13.2288	13.5592	11.2451	15.2575	11	11	10	11	0.0118725	0.013347	0.00269227	0.0287996
12	70150000	70155000	12	70210000	70215000	.	.	.	.	0,0,0	38	14.4125	14.2595	18.2355	13.2689	11	11	12	11	1.46076e-05	2.26092e-05	0.001847	5.35069e-05
12	70210000	70215000	12	70290000	70295000	.	.	.	.	0,0,0	41	11.7345	15.3752	21.6199	20.6067	10	11	13	13	8.66655e-09	2.03795e-06	0.0110692	0.0109561
12	70210000	70215000	12	70295000	70300000	.	.	.	.	0,0,0	29	8.01557	10.2091	14.3768	14.2616	9	10	11	11	2.20184e-05	0.000631809	0.0173458	0.0178204
12	70215000	70220000	12	70290000	70295000	.	.	.	.	0,0,0	62	12.5284	18.2093	22.5042	24.1735	11	12	13	13	1.68014e-16	2.17505e-12	1.64956e-08	1.62388e-08
12	70215000	70220000	12	70295000	70300000	.	.	.	.	0,0,0	43	8.91861	12.3066	15.7685	16.2514	9	10	12	12	2.31071e-12	2.26906e-09	9.20703e-05	9.51877e-05
12	70220000	70225000	12	70290000	70295000	.	.	.	.	0,0,0	30	7.69492	10.9011	10.9412	11.2823	8	10	10	10	2.54925e-07	0.000301853	0.000638216	0.000781155
12	70260000	70265000	12	70295000	70300000	.	.	.	.	0,0,0	16	3.62435	4.73241	5.45512	4.30056	5	6	7	6	0.00124328	0.00815994	0.0419077	0.0132102
12	70975000	70980000	12	71010000	71015000	.	.	.	.	0,0,0	27	8.95708	10.3144	9.87385	11.2126	9	10	10	10	0.000132942	0.00243569	0.00512333	0.00579741
12	70975000	70980000	12	71015000	71020000	.	.	.	.	0,0,0	33	11.4573	14.9982	18.6957	17.8847	10	11	12	12	1.86509e-05	0.000751241	0.0248815	0.0263629
12	70975000	70980000	12	71050000	71055000	.	.	.	.	0,0,0	30	8.9516	8.25202	10.7095	11.381	9	9	10	10	8.73644e-06	1.58798e-05	0.000638216	0.000781155
12	71010000	71015000	12	71045000	71050000	.	.	.	.	0,0,0	17	4.59726	5.96074	4.94833	6.8545	6	7	6	8	0.00197485	0.0124709	0.00586356	0.0701872
12	71010000	71015000	12	71050000	71055000	.	.	.	.	0,0,0	31	11.0994	12.2077	13.0112	15.0445	10	10	11	11	9.8328e-05	0.000147501	0.00590373	0.00594302
12	71010000	71015000	12	71080000	71085000	.	.	.	.	0,0,0	28	8.02724	8.7281	11.2625	8.26447	9	9	10	9	5.39532e-05	9.23762e-05	0.00269227	0.000187249
12	71010000	71015000	12	71450000	71455000	.	.	.	.	0,0,0	12	1.9853	1.98195	1.96923	2.94363	2	2	2	4	0.00370862	0.0078592	0.00762797	0.0489862
12	71015000	71020000	12	71050000	71055000	.	.	.	.	0,0,0	39	18.8614	16.7972	19.0165	19.4168	12	12	12	12	0.000417066	0.000423736	0.00104077	0.00118106
12	71025000	71030000	12	71080000	71085000	.	.	.	.	0,0,0	15	5.6816	5.5359	5.67285	6.01994	7	7	7	7	0.0291065	0.0443084	0.0779212	0.0788116
12	71395000	71400000	12	71445000	71450000	.	.	.	.	0,0,0	21	4.40248	5.18814	4.07535	6.39529	6	7	6	8	2.79519e-05	0.000498246	8.29506e-05	0.00508086
12	71395000	71400000	12	71450000	71455000	.	.	.	.	0,0,0	34	11.9165	13.3015	16.6924	17.8904	10	11	12	12	7.72474e-06	0.000391567	0.0157276	0.0168279
12	75060000	75065000	12	75095000	75100000	.	.	.	.	0,0,0	18	6.40403	8.19272	6.11872	7.60295	8	9	7	8	0.0149558	0.0662561	0.00955531	0.0395652
12	75060000	75065000	12	75120000	75125000	.	.	.	.	0,0,0	36	10.8206	10.8794	19.3445	11.6438	10	10	12	10	1.27911e-06	2.37673e-06	0.00572233	5.64738e-06
12	75060000	75065000	12	75125000	75130000	.	.	.	.	0,0,0	22	5.52265	5.64981	10.2517	7.26738	7	7	10	8	9.34461e-05	0.000186378	0.0787497	0.00247951
12	75060000	75065000	12	75175000	75180000	.	.	.	.	0,0,0	19	4.90477	4.64264	6.90851	4.50537	6	6	8	6	0.000269132	0.000566444	0.0225188	0.000789944
12	75260000	75265000	12	75315000	75320000	.	.	.	.	0,0,0	27	6.88795	8.51135	9.23025	8.89725	8	9	9	9	6.8662e-06	0.000208112	0.00049474	0.000441327
12	75285000	75290000	12	75325000	75330000	.	.	.	.	0,0,0	17	3.03845	5.37157	6.39207	5.09642	4	7	8	7	7.70591e-05	0.0124709	0.0725713	0.0222102
12	75350000	75355000	12	75385000	75390000	.	.	.	.	0,0,0	22	8.57974	8.33061	10.4733	10.2288	9	9	10	10	0.0054492	0.00767982	0.0787497	0.0805399
13	3510000	3515000	13	3560000	3565000	.	.	.	.	0,0,0	23	6.68175	6.62895	6.84723	9.48832	8	8	8	9	0.000326575	0.000599721	0.00126515	0.0085689
13	3515000	3520000	13	3560000	3565000	.	.	.	.	0,0,0	20	8.62982	7.17631	8.54181	7.79028	9	8	9	8	0.0189875	0.00552989	0.0479493	0.010513
13	10695000	10700000	13	10930000	10935000	.	.	.	.	0,0,0	22	6.32528	6.93252	10.7122	5.81211	8	8	10	7	0.000735879	0.00131262	0.0787497	0.000261144
13	10695000	10700000	13	11125000	11130000	.	.	.	.	0,0,0	16	4.19124	4.08892	4.14513	3.44106	6	6	6	5	0.00461177	0.00815994	0.0124265	0.0035613
13	10770000	10775000	13	10930000	10935000	.	.	.	.	0,0,0	22	10.0304	10.2179	10.2941	12.0638	10	10	10	10	0.0353406	0.0377448	0.0787497	0.0805399
13	10880000	10885000	13	10930000	10935000	.	.	.	.	0,0,0	49	10.4322	11.4714	16.952	9.64142	10	10	12	9	8.57509e-13	1.85818e-12	1.09905e-06	3.19288e-15
13	10880000	10885000	13	10980000	10985000	.	.	.	.	0,0,0	12	3.07391	2.92181	3.21909	1.69935	4	4	5	2	0.0209391	0.0353788	0.0986332	0.00774442
13	10880000	10885000	13	11125000	11130000	.	.	.	.	0,0,0	19	7.24281	6.74695	8.76282	7.81391	8	8	9	8	0.00762887	0.0110845	0.0811282	0.0214388
13	10930000	10935000	13	10965000	10970000	.	.	.	.	0,0,0	20	3.97472	7.11618	5.51519	8.87127	6	8	7	9	8.77235e-05	0.00552989	0.00186628	0.0503354
13	10930000	10935000	13	10970000	10975000	.	.	.	.	0,0,0	64	14.4716	13.1347	16.5248	19.6321	11	11	12	13	1.25387e-17	4.92641e-17	6.15917e-13	3.03242e-09
13	10930000	10935000	13	11030000	11035000	.	.	.	.	0,0,0	17	3.35973	5.19718	5.42155	4.40623	5	7	7	6	0.000427159	0.0124709	0.0209371	0.00571705
13	10930000	10935000	13	11125000	11130000	.	.	.	.	0,0,0	49	16.9641	16.0678	13.083	18.7196	12	12	11	12	2.75987e-07	3.47347e-07	2.62844e-09	1.00376e-06
13	10930000	10935000	13	11135000	11140000	.	.	.	.	0,0,0	31	13.3409	10.8558	7.56783	13.0219	11	10	8	11	0.00210759	0.000147501	3.46725e-07	0.00594302
13	10935000	10940000	13	10970000	10975000	.	.	.	.	0,0,0	23	5.42048	5.44101	6.17409	4.78455	7	7	7	6	3.42638e-05	7.1809e-05	0.000100436	7.96476e-06
13	16050000	16055000	13	16110000	16115000	.	.	.	.	0,0,0	17	5.8444	6.0573	5.88676	6.86286	7	7	7	8	0.00735115	0.0124709	0.0209371	0.0701872
13	17280000	17285000	13	17350000	17355000	.	.	.	.	0,0,0	37	18.8048	19.6216	23.6167	16.8289	12	13	13	12	0.00139352	0.0290156	0.05285	0.00363813
13	17350000	17355000	13	17400000	17405000	.	.	.	.	0,0,0	43	12.353	14.6397	25.0024	24.6262	10	11	14	14	1.01259e-09	3.54131e-07	0.0787388	0.0763864
13	17505000	17510000	13	17610000	17615000	.	.	.	.	0,0,0	17	4.8114	4.91703	3.12589	4.54298	6	6	4	6	0.00197485	0.00372722	0.000176244	0.00571705
13	17565000	17570000	13	17610000	17615000	.	.	.	.	0,0,0	19	7.44603	8.21414	9.46334	7.19557	8	9	9	8	0.00762887	0.0407966	0.0811282	0.0214388
13	19130000	19135000	13	19255000	19260000	.	.	.	.	0,0,0	12	1.61726	1.63169	1.60703	2.51095	2	2	2	4	0.00370862	0.0078592	0.00762797	0.0489862
13	22770000	22775000	13	22935000	22940000	.	.	.	.	0,0,0	11	2.35508	2.74293	1.84191	2.01218	3	4	2	3	0.0246042	0.0773483	0.0244088	0.0568751
13	22830000	22835000	13	22935000	22940000	.	.	.	.	0,0,0	12	2.74085	2.77057	3.75275	2.56975	4	4	5	4	0.0209391	0.0353788	0.0986332	0.0489862
13	30670000	30675000	13	30780000	30785000	.	.	.	.	0,0,0	16	3.17972	3.89336	4.94996	5.8127	5	5	6	7	0.00124328	0.00256764	0.0124265	0.0437082
13	30745000	30750000	13	31010000	31015000	.	.	.	.	0,0,0	21	6.10828	7.0096	7.03486	8.64585	7	8	8	9	0.000236683	0.00266206	0.00581603	0.029154
13	28560000	28565000	13	28700000	28705000	.	.	.	.	0,0,0	18	5.38274	5.00263	4.48282	4.30306	7	7	6	6	0.00326602	0.00597717	0.00223808	0.00212992
13	28560000	28565000	13	28805000	28810000	.	.	.	.	0,0,0	29	10.0521	11.8194	13.4265	15.3013	10	10	11	11	0.000436949	0.000631809	0.0173458	0.0178204
13	30795000	30800000	13	31005000	31010000	.	.	.	.	0,0,0	19	5.14851	6.17823	7.7049	6.97338	7	7	8	8	0.00143139	0.0027782	0.0225188	0.0214388
13	30795000	30800000	13	31010000	31015000	.	.	.	.	0,0,0	26	8.27798	8.47119	10.7996	7.25121	9	9	10	8	0.000299597	0.00045167	0.0097313	6.84484e-05
13	30975000	30980000	13	31010000	31015000	.	.	.	.	0,0,0	33	9.67543	11.3584	11.5366	11.3325	9	10	10	10	4.30607e-07	3.12467e-05	6.45432e-05	8.02338e-05
13	34065000	34070000	13	34175000	34180000	.	.	.	.	0,0,0	19	5.50438	5.53733	4.85612	7.49986	7	7	6	8	0.00143139	0.0027782	0.000831562	0.0214388
13	34135000	34140000	13	34175000	34180000	.	.	.	.	0,0,0	27	7.631	9.84282	13.4612	14.9623	8	9	11	11	6.8662e-06	0.000208112	0.0474394	0.0456097
13	34140000	34145000	13	34175000	34180000	.	.	.	.	0,0,0	36	13.2503	12.0874	5.33548	22.3397	11	10	7	13	7.05814e-05	2.37673e-06	2.43839e-12	0.0781764
13	34630000	34635000	13	34770000	34775000	.	.	.	.	0,0,0	12	3.89572	2.71989	3.51301	3.11079	5	4	5	4	0.0434891	0.0353788	0.0986332	0.0489862
13	34635000	34640000	13	34770000	34775000	.	.	.	.	0,0,0	18	6.92017	5.16541	5.20244	5.72456	8	7	7	7	0.0149558	0.00597717	0.00955531	0.010062
13	37480000	37485000	13	37680000	37685000	.	.	.	.	0,0,0	16	3.19843	3.86472	5.34571	3.67695	5	5	7	5	0.00124328	0.00256764	0.0419077	0.0035613
13	39490000	39495000	13	39525000	39530000	.	.	.	.	0,0,0	14	2.61547	4.1312	2.10107	2.4697	4	6	3	3	0.00312035	0.0356873	0.00238482	0.00232403
13	42215000	42220000	13	42260000	42265000	.	.	.	.	0,0,0	53	14.6865	18.5469	10.1297	24.9009	11	12	10	14	7.09913e-12	1.19545e-08	1.68578e-14	0.00156193
13	43735000	43740000	13	43800000	43805000	.	.	.	.	0,0,0	15	4.26931	5.33903	4.09284	6.14666	6	7	6	7	0.0107279	0.0443084	0.0275802	0.0788116
13	43800000	43805000	13	43955000	43960000	.	.	.	.	0,0,0	19	3.6677	5.34762	5.29915	5.81938	5	7	7	7	3.76889e-05	0.0027782	0.00440181	0.00453518
13	43805000	43810000	13	44020000	44025000	.	.	.	.	0,0,0	14	3.02248	3.91274	3.58365	4.15899	4	5	5	6	0.00312035	0.0163433	0.0211163	0.0587062
13	43880000	43885000	13	43935000	43940000	.	.	.	.	0,0,0	16	3.75932	4.4733	3.37068	4.98429	5	6	5	7	0.00124328	0.00815994	0.00314124	0.0437082
13	43890000	43895000	13	43935000	43940000	.	.	.	.	0,0,0	22	6.21572	7.62751	8.12687	10.4116	7	8	9	10	9.34461e-05	0.00131262	0.0153007	0.0805399
13	43890000	43895000	13	43990000	43995000	.	.	.	.	0,0,0	21	5.41435	6.46165	7.33914	6.30921	7	8	8	8	0.000236683	0.00266206	0.00581603	0.00508086
13	43935000	43940000	13	43990000	43995000	.	.	.	.	0,0,0	30	10.4825	13.0142	14.0712	18.719	10	11	11	12	0.000210039	0.00450241	0.0103142	0.0855084
13	43955000	43960000	13	43990000	43995000	.	.	.	.	0,0,0	24	4.67653	14.3844	8.878	8.25203	6	11	9	9	7.98413e-07	0.0764531	0.00452125	0.00427756
13	46590000	46595000	13	46905000	46910000	.	.	.	.	0,0,0	30	5.32377	6.75384	10.1809	7.01108	7	8	10	8	7.04179e-09	5.62558e-07	0.000638216	8.66373e-07
13	46600000	46605000	13	46855000	46860000	.	.	.	.	0,0,0	14	2.61072	3.20517	3.68999	4.82975	4	5	5	6	0.00312035	0.0163433	0.0211163	0.0587062
13	46870000	46875000	13	46905000	46910000	.	.	.	.	0,0,0	20	5.14241	10.3443	3.3428	4.93307	7	10	5	6	0.000595801	0.0909338	2.89253e-05	0.000258067
13	46875000	46880000	13	47280000	47285000	.	.	.	.	0,0,0	16	6.66689	5.80162	5.61544	5.97365	8	7	7	7	0.0509687	0.0236047	0.0419077	0.0437082
13	47235000	47240000	13	47275000	47280000	.	.	.	.	0,0,0	17	4.09436	5.36089	6.47107	5.45316	6	7	8	7	0.00197485	0.0124709	0.0725713	0.0222102
13	47240000	47245000	13	47275000	47280000	.	.	.	.	0,0,0	21	5.1635	7.03033	7.33276	6.23764	7	8	8	8	0.000236683	0.00266206	0.00581603	0.00508086
13	47280000	47285000	13	47340000	47345000	.	.	.	.	0,0,0	40	18.2068	20.779	15.0126	22.8221	12	13	11	13	0.000220654	0.00775705	1.01265e-05	0.0166018
13	47280000	47285000	13	47370000	47375000	.	.	.	.	0,0,0	46	13.2389	15.6679	23.9757	18.6836	11	12	13	12	1.19949e-08	3.5356e-06	0.000913554	1.06857e-05
13	47280000	47285000	13	47435000	47440000	.	.	.	.	0,0,0	58	21.0298	20.4917	25.4477	28.1422	13	13	14	14	9.23985e-08	1.02244e-07	0.000117965	0.000139537
13	47280000	47285000	13	47440000	47445000	.	.	.	.	0,0,0	30	10.6935	10.6677	14.9327	17.4931	10	10	11	12	0.000210039	0.000301853	0.0103142	0.0855084
13	47355000	47360000	13	47435000	47440000	.	.	.	.	0,0,0	31	10.8732	10.9993	11.1922	12.1506	10	10	10	10	9.8328e-05	0.000147501	0.000313698	0.000368122
13	47370000	47375000	13	47435000	47440000	.	.	.	.	0,0,0	30	9.60905	11.1746	11.5886	15.6273	9	10	10	12	8.73644e-06	0.000301853	0.000638216	0.0855084
13	47375000	47380000	13	47435000	47440000	.	.	.	.	0,0,0	34	12.4573	13.511	14.4027	18.1484	11	11	11	12	0.000299525	0.000391567	0.000880541	0.0168279
13	47375000	47380000	13	47440000	47445000	.	.	.	.	0,0,0	18	6.54033	7.04799	7.11062	7.45577	8	8	8	8	0.0149558	0.020608	0.0405628	0.0395652
13	50520000	50525000	13	50665000	50670000	.	.	.	.	0,0,0	22	4.74702	5.73766	8.20984	5.84157	6	7	9	7	8.79751e-06	0.000186378	0.0153007	0.000261144
13	50665000	50670000	13	50785000	50790000	.	.	.	.	0,0,0	27	5.58583	6.38561	8.67093	6.93259	7	8	9	8	3.24471e-07	1.53397e-05	0.00049474	2.53e-05
13	50665000	50670000	13	50790000	50795000	.	.	.	.	0,0,0	17	3.94463	4.9514	7.07041	5.18204	5	6	8	7	0.000427159	0.00372722	0.0725713	0.0222102
13	50735000	50740000	13	50770000	50775000	.	.	.	.	0,0,0	19	6.0089	7.28643	8.31292	6.08301	7	8	9	7	0.00143139	0.0110845	0.0811282	0.00453518
13	50735000	50740000	13	50775000	50780000	.	.	.	.	0,0,0	26	5.73448	7.2149	9.15344	6.95518	7	8	9	8	1.07353e-06	4.27594e-05	0.00104429	6.84484e-05
13	50735000	50740000	13	50785000	50790000	.	.	.	.	0,0,0	26	8.42219	8.43344	7.90546	10.8798	9	9	9	10	0.000299597	0.00045167	0.00104429	0.0106321
13	50735000	50740000	13	50790000	50795000	.	.	.	.	0,0,0	19	5.31971	4.77823	3.15238	8.44408	7	6	5	9	0.00143139	0.000566444	9.6188e-05	0.0835667
13	51345000	51350000	13	51385000	51390000	.	.	.	.	0,0,0	37	13.5421	14.8689	18.1775	20.0503	11	11	12	13	3.21996e-05	4.69472e-05	0.00326503	0.0547185
13	51345000	51350000	13	51430000	51435000	.	.	.	.	0,0,0	25	7.04067	9.80203	11.7107	7.23584	8	9	10	8	5.23604e-05	0.000982892	0.0174733	0.000177305
13	51385000	51390000	13	51430000	51435000	.	.	.	.	0,0,0	20	9.04195	8.84856	9.31111	9.58999	9	9	9	9	0.0189875	0.0239339	0.0479493	0.0503354
13	51430000	51435000	13	51465000	51470000	.	.	.	.	0,0,0	20	4.22575	6.22498	5.04346	4.99645	6	7	7	7	8.77235e-05	0.00125312	0.00186628	0.00181023
13	54170000	54175000	13	54415000	54420000	.	.	.	.	0,0,0	14	2.47153	2.96428	3.72204	1.52099	3	4	5	1	0.000848655	0.00587831	0.0211163	9.53348e-05
13	54300000	54305000	13	54415000	54420000	.	.	.	.	0,0,0	17	4.17768	5.63997	7.11363	7.11731	6	7	8	8	0.00197485	0.0124709	0.0725713	0.0701872
13	54345000	54350000	13	54390000	54395000	.	.	.	.	0,0,0	32	11.7904	13.3832	18.5209	18.0191	10	11	12	12	4.35595e-05	0.00145406	0.0386574	0.0414278
13	54360000	54365000	13	54415000	54420000	.	.	.	.	0,0,0	25	8.03779	8.3877	8.68246	8.3762	9	9	9	9	0.000657915	0.000982892	0.00214828	0.00202776
13	54370000	54375000	13	54420000	54425000	.	.	.	.	0,0,0	17	4.33926	4.89638	3.3726	6.31874	6	6	5	8	0.00197485	0.00372722	0.00113376	0.0701872
13	52500000	52505000	13	52665000	52670000	.	.	.	.	0,0,0	33	6.93827	6.88962	6.96384	9.38353	8	8	8	9	8.53328e-09	1.92265e-08	3.46829e-08	1.79733e-06
13	52570000	52575000	13	52610000	52615000	.	.	.	.	0,0,0	20	9.14527	10.8775	7.72076	9.43859	9	10	8	9	0.0189875	0.0909338	0.0117797	0.0503354
13	52570000	52575000	13	52665000	52670000	.	.	.	.	0,0,0	27	5.54228	6.10246	6.62592	5.49992	7	7	8	7	3.24471e-07	6.88992e-07	2.88206e-05	9.46201e-07
13	52575000	52580000	13	52665000	52670000	.	.	.	.	0,0,0	20	5.62609	6.01859	7.58722	7.03598	7	7	8	8	0.000595801	0.00125312	0.0117797	0.010513
13	52610000	52615000	13	52665000	52670000	.	.	.	.	0,0,0	22	11.1848	9.69956	9.58857	7.81318	10	9	9	8	0.0353406	0.00767982	0.0153007	0.00247951
13	52665000	52670000	13	52710000	52715000	.	.	.	.	0,0,0	24	6.61054	7.88738	10.1217	7.67848	8	9	10	8	0.000133047	0.00206957	0.0294512	0.000447412
13	52710000	52715000	13	52750000	52755000	.	.	.	.	0,0,0	18	8.21904	8.28749	5.86284	7.80682	9	9	7	8	0.0581021	0.0662561	0.00955531	0.0395652
13	52710000	52715000	13	52870000	52875000	.	.	.	.	0,0,0	20	4.85196	7.67693	6.93149	7.76454	6	8	8	8	8.77235e-05	0.00552989	0.0117797	0.010513
13	53115000	53120000	13	53255000	53260000	.	.	.	.	0,0,0	26	9.76378	9.21986	9.22977	14.1569	9	9	9	11	0.000299597	0.00045167	0.00104429	0.0691806
13	53255000	53260000	13	53460000	53465000	.	.	.	.	0,0,0	33	7.87991	7.54732	4.77173	17.6352	9	8	6	12	4.30607e-07	1.92265e-08	1.70436e-12	0.0263629
13	53275000	53280000	13	53460000	53465000	.	.	.	.	0,0,0	22	5.77772	5.16634	4.8124	5.06249	7	7	6	7	9.34461e-05	0.000186378	2.64616e-05	0.000261144
13	53355000	53360000	13	53460000	53465000	.	.	.	.	0,0,0	15	7.51418	4.73613	3.41384	5.87024	8	6	5	7	0.0866935	0.0174153	0.00832192	0.0788116
13	53405000	53410000	13	53460000	53465000	.	.	.	.	0,0,0	34	11.3778	11.0472	9.73462	5.24577	10	10	9	7	7.72474e-06	1.33892e-05	8.35911e-07	5.15182e-11
13	53415000	53420000	13	53460000	53465000	.	.	.	.	0,0,0	31	12.5259	12.3105	5.56353	16.9078	11	10	7	12	0.00210759	0.000147501	4.41501e-09	0.0597068
13	53745000	53750000	13	53795000	53800000	.	.	.	.	0,0,0	14	3.94739	3.10425	2.4895	3.7683	6	4	3	5	0.0228825	0.00587831	0.00238482	0.0239566
13	53795000	53800000	13	53900000	53905000	.	.	.	.	0,0,0	17	2.36942	2.90618	1.84475	4.73995	3	4	2	6	1.05904e-05	0.000149312	2.95089e-06	0.00571705
13	53795000	53800000	13	54015000	54020000	.	.	.	.	0,0,0	13	2.22245	3.87296	2.72611	3.04802	3	5	4	4	0.00279279	0.0350944	0.0195784	0.0198157
13	53905000	53910000	13	54015000	54020000	.	.	.	.	0,0,0	12	4.4869	3.87305	3.83286	1.43162	6	5	5	1	0.0852293	0.0690511	0.0986332	0.0018916
13	54015000	54020000	13	54170000	54175000	.	.	.	.	0,0,0	19	4.10311	5.13775	4.48722	7.99136	6	7	6	9	0.000269132	0.0027782	0.000831562	0.0835667
13	54170000	54175000	13	54265000	54270000	.	.	.	.	0,0,0	14	1.93538	2.94817	4.09408	2.91121	2	4	6	4	0.000210062	0.00587831	0.0591247	0.00726851
13	54265000	54270000	13	54300000	54305000	.	.	.	.	0,0,0	17	1.68189	4.70592	5.48439	3.45	2	6	7	5	1.19063e-06	0.00372722	0.0209371	0.00138412
13	54265000	54270000	13	54345000	54350000	.	.	.	.	0,0,0	24	5.01713	4.66195	7.4848	6.31972	7	6	8	8	1.10059e-05	1.55452e-06	0.000526658	0.000447412
13	54300000	54305000	13	54345000	54350000	.	.	.	.	0,0,0	15	5.01	5.96029	6.18516	3.16773	7	7	7	5	0.0291065	0.0443084	0.0779212	0.00963794
13	58030000	58035000	13	58065000	58070000	.	.	.	.	0,0,0	19	3.69756	7.35373	3.2634	4.34079	5	8	5	6	3.76889e-05	0.0110845	9.6188e-05	0.000789944
13	58800000	58805000	13	58835000	58840000	.	.	.	.	0,0,0	18	6.63765	6.5423	6.39775	7.18294	8	8	8	8	0.0149558	0.020608	0.0405628	0.0395652
13	60005000	60010000	13	60065000	60070000	.	.	.	.	0,0,0	11	2.08838	2.10619	1.7597	1.30367	3	3	2	1	0.0246042	0.0472408	0.0244088	0.00835868
13	60365000	60370000	13	60415000	60420000	.	.	.	.	0,0,0	29	12.4975	11.2949	13.6979	8.44932	11	10	11	9	0.00688303	0.000631809	0.0173458	7.83373e-05
13	60415000	60420000	13	60500000	60505000	.	.	.	.	0,0,0	19	6.04126	6.95817	6.31234	9.79705	7	8	8	9	0.00143139	0.0110845	0.0225188	0.0835667
13	60415000	60420000	13	60580000	60585000	.	.	.	.	0,0,0	32	7.62047	6.97391	6.8474	11.0628	8	8	8	10	2.62757e-08	5.21144e-08	1.09524e-07	0.000178515
13	60415000	60420000	13	60595000	60600000	.	.	.	.	0,0,0	35	14.4189	10.1292	7.23179	9.98697	11	10	8	10	0.000148622	5.73657e-06	3.10506e-09	1.41805e-05
13	60415000	60420000	13	60930000	60935000	.	.	.	.	0,0,0	18	3.7869	4.07661	6.00578	4.08868	5	6	7	6	0.000129896	0.00136262	0.00955531	0.00212992
13	60505000	60510000	13	60580000	60585000	.	.	.	.	0,0,0	22	6.52071	6.23741	4.10023	9.9256	8	8	6	10	0.000735879	0.00131262	2.64616e-05	0.0805399
13	60525000	60530000	13	60580000	60585000	.	.	.	.	0,0,0	17	3.56269	3.90981	4.83415	5.57843	5	5	6	7	0.000427159	0.000994097	0.00586356	0.0222102
13	60525000	60530000	13	60590000	60595000	.	.	.	.	0,0,0	13	2.35074	2.14667	1.79725	2.01743	3	3	2	3	0.00279279	0.00654614	0.0020789	0.00750925
13	60580000	60585000	13	60930000	60935000	.	.	.	.	0,0,0	15	4.42927	4.50657	3.56793	5.25722	6	6	5	7	0.0107279	0.0174153	0.00832192	0.0788116
13	60695000	60700000	13	60840000	60845000	.	.	.	.	0,0,0	12	2.30492	2.49715	3.70105	2.47474	3	4	5	3	0.00902681	0.0353788	0.0986332	0.0224049
13	60700000	60705000	13	60840000	60845000	.	.	.	.	0,0,0	36	7.67417	8.44225	15.2913	8.87882	8	9	11	9	2.06796e-10	3.16863e-08	0.000238407	7.8148e-08
13	60700000	60705000	13	60850000	60855000	.	.	.	.	0,0,0	56	11.8914	13.0101	15.8105	15.5451	10	11	12	11	8.31213e-17	5.35813e-13	2.31191e-09	1.32844e-12
13	60700000	60705000	13	60860000	60865000	.	.	.	.	0,0,0	19	5.65556	5.54431	8.8459	1.63362	7	7	9	2	0.00143139	0.0027782	0.0811282	6.80056e-08
13	60840000	60845000	13	60880000	60885000	.	.	.	.	0,0,0	32	10.4377	14.5122	18.1855	9.56019	10	11	12	9	4.35595e-05	0.00145406	0.0386574	4.61687e-06
13	60840000	60845000	13	60905000	60910000	.	.	.	.	0,0,0	42	11.2139	13.503	13.3473	22.6233	10	11	11	13	2.89085e-09	8.41065e-07	1.83029e-06	0.00714479
13	60850000	60855000	13	60900000	60905000	.	.	.	.	0,0,0	42	6.72262	8.816	5.63911	11.3481	8	9	7	10	3.99581e-14	2.21867e-11	1.64555e-16	1.43719e-08
13	60850000	60855000	13	60905000	60910000	.	.	.	.	0,0,0	83	19.6578	24.034	33.9903	24.6691	13	13	15	14	6.44362e-18	3.35605e-18	2.59406e-08	1.5945e-12
13	60850000	60855000	13	61035000	61040000	.	.	.	.	0,0,0	20	7.7158	7.8688	8.2848	7.5647	8	9	9	8	0.00365306	0.0239339	0.0479493	0.010513
13	60850000	60855000	13	61050000	61055000	.	.	.	.	0,0,0	15	4.85496	5.0645	5.03206	4.50219	6	7	7	6	0.0107279	0.0443084	0.0779212	0.0288497
13	60870000	60875000	13	60905000	60910000	.	.	.	.	0,0,0	47	7.31285	15.0276	15.478	8.8065	8	11	11	9	8.93608e-18	7.56538e-09	1.92113e-08	3.73453e-14
13	60595000	60600000	13	61505000	61510000	.	.	.	.	0,0,0	12	1.85958	1.94685	2.78216	2.08106	2	2	4	3	0.00370862	0.0078592	0.0483231	0.0224049
13	61420000	61425000	13	61465000	61470000	.	.	.	.	0,0,0	19	7.01858	5.80317	5.45652	6.10555	8	7	7	7	0.00762887	0.0027782	0.00440181	0.00453518
13	62745000	62750000	13	62795000	62800000	.	.	.	.	0,0,0	22	6.73507	6.85053	3.17008	8.17629	8	8	5	9	0.000735879	0.00131262	1.74626e-06	0.0160889
13	62760000	62765000	13	62795000	62800000	.	.	.	.	0,0,0	32	6.04147	11.5206	9.17213	11.0817	7	10	9	10	4.44543e-10	7.03013e-05	5.50303e-06	0.000178515
13	62760000	62765000	13	62845000	62850000	.	.	.	.	0,0,0	14	4.44447	4.94483	4.82024	4.87716	6	6	6	6	0.0228825	0.0356873	0.0591247	0.0587062
13	62810000	62815000	13	62850000	62855000	.	.	.	.	0,0,0	22	6.82059	7.98837	7.44653	8.70675	8	9	8	9	0.000735879	0.00767982	0.00271474	0.0160889
13	63945000	63950000	13	63990000	63995000	.	.	.	.	0,0,0	20	9.73606	7.58905	4.35059	4.51756	9	8	6	6	0.0189875	0.00552989	0.000276454	0.000258067
13	63945000	63950000	13	64045000	64050000	.	.	.	.	0,0,0	22	4.24405	4.11504	5.2865	5.31009	6	6	7	7	8.79751e-06	1.75017e-05	0.0002794	0.000261144
13	64410000	64415000	13	64475000	64480000	.	.	.	.	0,0,0	22	7.16437	7.63368	8.20433	8.63734	8	8	9	9	0.000735879	0.00131262	0.0153007	0.0160889
13	64450000	64455000	13	64525000	64530000	.	.	.	.	0,0,0	23	9.13051	10.3047	9.22073	12.3794	9	10	9	10	0.00280214	0.0232949	0.00841452	0.051787
13	64475000	64480000	13	64580000	64585000	.	.	.	.	0,0,0	22	8.33378	11.014	11.7411	10.4639	9	10	10	10	0.0054492	0.0377448	0.0787497	0.0805399
13	65225000	65230000	13	65270000	65275000	.	.	.	.	0,0,0	12	3.0841	3.02181	2.95932	2.22594	4	4	4	3	0.0209391	0.0353788	0.0483231	0.0224049
13	65270000	65275000	13	65305000	65310000	.	.	.	.	0,0,0	21	4.05245	7.4294	9.16726	7.18147	6	8	9	8	2.79519e-05	0.00266206	0.0277717	0.00508086
13	65525000	65530000	13	65640000	65645000	.	.	.	.	0,0,0	18	6.127	5.22171	5.70686	4.98636	7	7	7	7	0.00326602	0.00597717	0.00955531	0.010062
13	65545000	65550000	13	65595000	65600000	.	.	.	.	0,0,0	32	6.1798	7.51774	15.4443	10.7679	7	8	11	10	4.44543e-10	5.21144e-08	0.00327101	0.000178515
13	65545000	65550000	13	66030000	66035000	.	.	.	.	0,0,0	15	1.29962	1.837	1.94204	4.83115	1	2	2	6	6.78392e-06	7.64417e-05	8.7331e-05	0.0288497
13	65800000	65805000	13	66030000	66035000	.	.	.	.	0,0,0	19	5.70558	7.24871	5.26263	7.96832	7	8	7	9	0.00143139	0.0110845	0.00440181	0.0835667
13	66030000	66035000	13	66590000	66595000	.	.	.	.	0,0,0	14	2.30583	2.99197	2.22054	1.35846	3	4	3	1	0.000848655	0.00587831	0.00238482	9.53348e-05
13	66495000	66500000	13	66590000	66595000	.	.	.	.	0,0,0	19	6.41927	6.64588	6.98972	8.24837	8	8	8	9	0.00762887	0.0110845	0.0225188	0.0835667
13	69235000	69240000	13	69305000	69310000	.	.	.	.	0,0,0	33	9.83963	12.962	18.4185	13.3575	9	11	12	11	4.30607e-07	0.000751241	0.0248815	0.00180921
13	69270000	69275000	13	69305000	69310000	.	.	.	.	0,0,0	28	7.22928	18.144	8.91888	13.5724	8	12	9	11	2.43993e-06	0.0911664	0.00021104	0.0287996
13	71650000	71655000	13	71730000	71735000	.	.	.	.	0,0,0	36	8.60117	10.2457	11.6686	15.5133	9	10	10	11	1.68381e-08	2.37673e-06	4.82889e-06	0.000236202
13	71650000	71655000	13	71735000	71740000	.	.	.	.	0,0,0	15	4.41551	4.60844	4.51761	5.09255	6	6	6	7	0.0107279	0.0174153	0.0275802	0.0788116
13	71650000	71655000	13	72215000	72220000	.	.	.	.	0,0,0	11	2.5644	2.1676	1.34914	2.35	4	3	1	3	0.0491346	0.0472408	0.0109955	0.0568751
13	72820000	72825000	13	72895000	72900000	.	.	.	.	0,0,0	26	10.6905	10.0049	12.7013	12.3673	10	10	11	10	0.00350961	0.00450532	0.0708907	0.0106321
13	72830000	72835000	13	72910000	72915000	.	.	.	.	0,0,0	13	3.12032	3.18443	3.90152	3.04808	4	5	5	4	0.00846838	0.0350944	0.0486373	0.0198157
13	72895000	72900000	13	72930000	72935000	.	.	.	.	0,0,0	20	6.79445	8.47622	9.73525	6.8226	8	9	9	8	0.00365306	0.0239339	0.0479493	0.010513
13	74090000	74095000	13	74130000	74135000	.	.	.	.	0,0,0	18	4.72852	5.75278	7.05695	7.23104	6	7	8	8	0.000711911	0.00597717	0.0405628	0.0395652
13	74120000	74125000	13	74195000	74200000	.	.	.	.	0,0,0	16	4.48565	5.66186	5.55581	5.68489	6	7	7	7	0.00461177	0.0236047	0.0419077	0.0437082
13	74195000	74200000	13	74255000	74260000	.	.	.	.	0,0,0	23	7.349	7.37197	6.59978	10.0802	8	8	8	10	0.000326575	0.000599721	0.00126515	0.051787
13	74265000	74270000	13	74335000	74340000	.	.	.	.	0,0,0	16	6.63687	5.79175	5.29227	4.56272	8	7	7	6	0.0509687	0.0236047	0.0419077	0.0132102
13	74265000	74270000	13	74600000	74605000	.	.	.	.	0,0,0	15	3.10377	4.09396	4.32945	4.19714	4	6	6	6	0.000962873	0.0174153	0.0275802	0.0288497
13	74600000	74605000	13	74635000	74640000	.	.	.	.	0,0,0	23	5.9207	7.37362	8.7822	4.41203	7	8	9	6	3.42638e-05	0.000599721	0.00841452	7.96476e-06
13	74600000	74605000	13	74650000	74655000	.	.	.	.	0,0,0	20	3.85125	4.29371	3.92062	6.50235	5	6	5	8	9.25108e-06	0.000185581	2.89253e-05	0.010513
13	76405000	76410000	13	76610000	76615000	.	.	.	.	0,0,0	13	2.90308	2.99108	2.59294	3.44244	4	4	4	5	0.00846838	0.0159952	0.0195784	0.0522406
13	76490000	76495000	13	76550000	76555000	.	.	.	.	0,0,0	19	5.61502	5.98177	7.34271	7.66079	7	7	8	8	0.00143139	0.0027782	0.0225188	0.0214388
13	76490000	76495000	13	76555000	76560000	.	.	.	.	0,0,0	22	8.91227	9.93946	11.3333	8.84739	9	10	10	9	0.0054492	0.0377448	0.0787497	0.0160889
13	76510000	76515000	13	76545000	76550000	.	.	.	.	0,0,0	14	1.99342	4.46891	2.5748	2.9138	3	6	4	4	0.000848655	0.0356873	0.00793464	0.00726851
13	76725000	76730000	13	76900000	76905000	.	.	.	.	0,0,0	13	3.08282	2.72967	3.28957	1.28682	4	4	5	1	0.00846838	0.0159952	0.0486373	0.000423898
13	76825000	76830000	13	76900000	76905000	.	.	.	.	0,0,0	19	5.77248	5.99854	5.12568	9.59266	7	7	7	9	0.00143139	0.0027782	0.00440181	0.0835667
13	77260000	77265000	13	77295000	77300000	.	.	.	.	0,0,0	15	2.21383	4.22786	3.99966	2.32351	3	6	6	3	0.00020407	0.0174153	0.0275802	0.000640135
13	77615000	77620000	13	77710000	77715000	.	.	.	.	0,0,0	15	3.97429	4.25072	3.90417	4.49493	6	6	5	6	0.0107279	0.0174153	0.00832192	0.0288497
13	77615000	77620000	13	77925000	77930000	.	.	.	.	0,0,0	16	4.29768	4.25177	6.20036	3.41468	6	6	7	5	0.00461177	0.00815994	0.0419077	0.0035613
13	77670000	77675000	13	77710000	77715000	.	.	.	.	0,0,0	14	3.37417	4.29345	3.02211	4.59323	5	6	4	6	0.00871876	0.0356873	0.00793464	0.0587062
13	77735000	77740000	13	77820000	77825000	.	.	.	.	0,0,0	29	11.7176	10.5135	11.1942	13.5497	10	10	10	11	0.000436949	0.000631809	0.00133429	0.0178204
13	77735000	77740000	13	77835000	77840000	.	.	.	.	0,0,0	20	10.6499	7.93342	8.24969	9.25834	10	9	9	9	0.0900515	0.0239339	0.0479493	0.0503354
13	77735000	77740000	13	77925000	77930000	.	.	.	.	0,0,0	31	9.80755	9.87309	11.7535	10.4393	9	10	10	10	3.29237e-06	0.000147501	0.000313698	0.000368122
13	77755000	77760000	13	77820000	77825000	.	.	.	.	0,0,0	23	6.49717	6.91057	8.77481	7.21397	8	8	9	8	0.000326575	0.000599721	0.00841452	0.00108839
13	77810000	77815000	13	77885000	77890000	.	.	.	.	0,0,0	22	8.4673	10.2036	10.2166	11.5715	9	10	10	10	0.0054492	0.0377448	0.0787497	0.0805399
13	77810000	77815000	13	77925000	77930000	.	.	.	.	0,0,0	36	18.219	17.0603	19.4422	22.1649	12	12	12	13	0.00253143	0.00245952	0.00572233	0.0781764
13	77815000	77820000	13	77885000	77890000	.	.	.	.	0,0,0	19	8.00378	8.58038	9.52779	8.0407	9	9	9	9	0.033828	0.0407966	0.0811282	0.0835667
13	77820000	77825000	13	77885000	77890000	.	.	.	.	0,0,0	31	9.61203	11.9893	11.8811	7.96779	9	10	10	9	3.29237e-06	0.000147501	0.000313698	1.22493e-05
13	77835000	77840000	13	77925000	77930000	.	.	.	.	0,0,0	36	12.1452	15.4525	19.7364	20.2402	10	11	13	13	1.27911e-06	0.000102075	0.0760351	0.0781764
13	77840000	77845000	13	77925000	77930000	.	.	.	.	0,0,0	51	13.1976	17.7037	19.3464	25.8634	11	12	12	14	6.49188e-11	6.58593e-08	1.98116e-07	0.00378898
13	77870000	77875000	13	77925000	77930000	.	.	.	.	0,0,0	41	16.2453	15.0837	16.8457	17.0615	12	11	12	12	0.000115978	2.03795e-06	0.000331991	0.00036115
13	77885000	77890000	13	77925000	77930000	.	.	.	.	0,0,0	37	14.1625	14.6676	24.3767	11.4342	11	11	13	10	3.21996e-05	4.69472e-05	0.05285	2.23704e-06
13	77925000	77930000	13	77965000	77970000	.	.	.	.	0,0,0	22	4.94195	8.57886	7.97714	8.3734	6	9	9	9	8.79751e-06	0.00767982	0.0153007	0.0160889
13	77885000	77890000	13	77985000	77990000	.	.	.	.	0,0,0	21	5.18407	5.63438	4.83403	6.41737	7	7	6	8	0.000236683	0.000498246	8.29506e-05	0.00508086
13	77925000	77930000	13	78060000	78065000	.	.	.	.	0,0,0	22	7.89543	8.29299	9.9951	9.41643	9	9	10	9	0.0054492	0.00767982	0.0787497	0.0160889
13	77935000	77940000	13	78000000	78005000	.	.	.	.	0,0,0	16	3.85428	4.21275	3.70881	5.09891	5	6	5	7	0.00124328	0.00815994	0.00314124	0.0437082
13	80665000	80670000	13	80740000	80745000	.	.	.	.	0,0,0	17	6.23827	6.33717	7.80259	7.20172	8	8	8	8	0.0279685	0.0372598	0.0725713	0.0701872
13	80665000	80670000	13	80750000	80755000	.	.	.	.	0,0,0	18	7.19077	6.57606	5.90161	7.26619	8	8	7	8	0.0149558	0.020608	0.00955531	0.0395652
13	80665000	80670000	13	80945000	80950000	.	.	.	.	0,0,0	15	3.83781	3.23962	4.91773	3.27905	5	5	6	5	0.00346019	0.00690573	0.0275802	0.00963794
13	80665000	80670000	13	80960000	80965000	.	.	.	.	0,0,0	19	8.71461	5.50624	9.30867	6.58775	9	7	9	8	0.033828	0.0027782	0.0811282	0.0214388
13	80675000	80680000	13	80960000	80965000	.	.	.	.	0,0,0	33	13.239	9.56724	14.1443	9.57196	11	9	11	9	0.000585825	7.80281e-07	0.00172605	1.79733e-06
13	80680000	80685000	13	80960000	80965000	.	.	.	.	0,0,0	19	8.2885	6.81847	9.40838	6.92514	9	8	9	8	0.033828	0.0110845	0.0811282	0.0214388
13	80685000	80690000	13	80960000	80965000	.	.	.	.	0,0,0	23	8.55734	8.64321	9.31619	8.66161	9	9	9	9	0.00280214	0.00412107	0.00841452	0.0085689
13	80705000	80710000	13	80740000	80745000	.	.	.	.	0,0,0	24	4.51837	13.7476	7.94326	5.53676	6	11	9	7	7.98413e-07	0.0764531	0.00452125	3.59681e-05
13	80740000	80745000	13	80900000	80905000	.	.	.	.	0,0,0	21	5.47742	6.87391	6.78372	7.89437	7	8	8	9	0.000236683	0.00266206	0.00581603	0.029154
13	80740000	80745000	13	80960000	80965000	.	.	.	.	0,0,0	20	8.8514	9.2527	8.84771	7.83501	9	9	9	8	0.0189875	0.0239339	0.0479493	0.010513
13	80800000	80805000	13	80945000	80950000	.	.	.	.	0,0,0	13	2.67093	3.13889	3.90589	3.40374	4	5	5	5	0.00846838	0.0350944	0.0486373	0.0522406
13	80805000	80810000	13	80955000	80960000	.	.	.	.	0,0,0	11	1.6494	2.1842	2.40367	1.61428	2	3	3	2	0.0128071	0.0472408	0.0538051	0.0255303
NW_017189629.1	155000	160000	NW_017189629.1	210000	215000	.	.	.	.	0,0,0	46	10.5139	12.0738	22.2249	17.6385	10	10	13	12	3.18677e-11	8.70991e-11	0.000913554	1.06857e-05
NW_017189629.1	155000	160000	NW_017189629.1	215000	220000	.	.	.	.	0,0,0	32	6.56938	7.47424	10.7311	9.36936	8	8	10	9	2.62757e-08	5.21144e-08	0.000143669	4.61687e-06
NW_017189629.1	155000	160000	NW_017189629.1	235000	240000	.	.	.	.	0,0,0	22	6.72847	7.03162	10.4017	4.89261	8	8	10	6	0.000735879	0.00131262	0.0787497	2.69565e-05
NW_017189629.1	155000	160000	NW_017189629.1	250000	255000	.	.	.	.	0,0,0	39	7.86514	9.55842	15.5924	10.7761	9	9	12	10	4.59177e-10	9.84877e-10	0.00104077	3.09047e-07
NW_017189629.1	155000	160000	NW_017189629.1	305000	310000	.	.	.	.	0,0,0	37	7.49073	8.60939	9.16635	11.5658	8	9	9	10	5.24704e-11	1.02993e-08	3.308e-08	2.23704e-06
NW_017189629.1	155000	160000	NW_017189629.1	530000	535000	.	.	.	.	0,0,0	12	2.36472	2.51225	1.58172	2.55491	3	4	2	4	0.00902681	0.0353788	0.00762797	0.0489862
NW_017189629.1	165000	170000	NW_017189629.1	210000	215000	.	.	.	.	0,0,0	23	3.60176	4.85446	8.90228	7.61557	5	6	9	8	1.36611e-07	5.72864e-06	0.00841452	0.00108839
NW_017189629.1	210000	215000	NW_017189629.1	250000	255000	.	.	.	.	0,0,0	48	14.6522	16.1086	15.4265	25.2228	11	12	11	14	1.53172e-09	7.25118e-07	7.22219e-09	0.0132853
NW_017189629.1	210000	215000	NW_017189629.1	305000	310000	.	.	.	.	0,0,0	32	10.083	12.5331	12.4114	18.5623	10	11	11	12	4.35595e-05	0.00145406	0.00327101	0.0414278
NW_017189629.1	210000	215000	NW_017189629.1	310000	315000	.	.	.	.	0,0,0	27	7.44329	8.35996	7.55745	11.1333	8	9	8	10	6.8662e-06	0.000208112	2.88206e-05	0.00579741
NW_017189629.1	215000	220000	NW_017189629.1	250000	255000	.	.	.	.	0,0,0	33	6.96612	8.97319	11.0789	7.35749	8	9	10	8	8.53328e-09	7.80281e-07	6.45432e-05	2.38525e-08
NW_017189629.1	215000	220000	NW_017189629.1	305000	310000	.	.	.	.	0,0,0	32	6.61163	8.16087	9.12616	12.6694	8	9	9	11	2.62757e-08	2.20662e-06	5.50303e-06	0.00336471
NW_017189629.1	215000	220000	NW_017189629.1	310000	315000	.	.	.	.	0,0,0	18	4.99511	5.3394	5.82341	7.50482	7	7	7	8	0.00326602	0.00597717	0.00955531	0.0395652
NW_017189629.1	235000	240000	NW_017189629.1	305000	310000	.	.	.	.	0,0,0	26	5.90635	8.1449	8.49439	12.7366	7	9	9	11	1.07353e-06	0.00045167	0.00104429	0.0691806
NW_017189629.1	245000	250000	NW_017189629.1	305000	310000	.	.	.	.	0,0,0	26	7.09244	8.68599	8.52237	11.6864	8	9	9	10	1.93359e-05	0.00045167	0.00104429	0.0106321
NW_017189629.1	250000	255000	NW_017189629.1	305000	310000	.	.	.	.	0,0,0	41	7.97874	11.7927	12.1903	23.6262	9	10	10	13	3.77776e-11	1.92826e-08	3.68266e-08	0.0109561
14	11670000	11675000	14	11705000	11710000	.	.	.	.	0,0,0	45	11.8767	11.4441	11.5791	13.7097	10	10	10	11	9.73058e-11	2.54388e-10	3.97576e-10	1.40985e-07
14	12690000	12695000	14	13010000	13015000	.	.	.	.	0,0,0	18	4.15702	4.09499	5.97606	3.06004	6	6	7	4	0.000711911	0.00136262	0.00955531	4.48753e-05
14	12795000	12800000	14	12855000	12860000	.	.	.	.	0,0,0	17	5.33607	6.72123	6.33237	6.52062	7	8	8	8	0.00735115	0.0372598	0.0725713	0.0701872
14	12805000	12810000	14	12845000	12850000	.	.	.	.	0,0,0	45	21.2503	21.4499	19.7798	22.9519	13	13	13	13	0.000696341	0.000637869	0.00158353	0.00164863
14	12805000	12810000	14	12850000	12855000	.	.	.	.	0,0,0	31	11.7836	13.8544	16.8895	15.249	10	11	12	11	9.8328e-05	0.00256187	0.0549939	0.00594302
14	12805000	12810000	14	12855000	12860000	.	.	.	.	0,0,0	64	25.9272	28.0397	37.5848	24.3604	14	14	15	13	1.14861e-06	1.17081e-06	0.00112429	3.03242e-09
14	12805000	12810000	14	12875000	12880000	.	.	.	.	0,0,0	48	18.434	18.9049	25.0312	21.1038	12	12	14	13	6.27937e-07	7.25118e-07	0.0132258	0.000304048
14	12805000	12810000	14	12885000	12890000	.	.	.	.	0,0,0	35	10.8491	10.43	13.4162	12.976	10	10	11	11	3.24305e-06	5.73657e-06	0.000461986	0.000480434
14	12805000	12810000	14	12895000	12900000	.	.	.	.	0,0,0	30	11.647	9.99754	12.5805	16.5115	10	10	11	12	0.000210039	0.000301853	0.0103142	0.0855084
14	12805000	12810000	14	13010000	13015000	.	.	.	.	0,0,0	29	10.6998	8.6779	13.6322	7.14975	10	9	11	8	0.000436949	3.74098e-05	0.0173458	2.93172e-06
14	12860000	12865000	14	12895000	12900000	.	.	.	.	0,0,0	15	2.85951	4.32086	3.36717	5.07834	4	6	5	7	0.000962873	0.0174153	0.00832192	0.0788116
14	12955000	12960000	14	12990000	12995000	.	.	.	.	0,0,0	18	5.24158	9.21654	7.69066	7.36753	7	9	8	8	0.00326602	0.0662561	0.0405628	0.0395652
14	12955000	12960000	14	13010000	13015000	.	.	.	.	0,0,0	48	12.5235	19.2813	21.6369	25.171	11	12	13	14	1.53172e-09	7.25118e-07	0.000274883	0.0132853
14	13010000	13015000	14	13120000	13125000	.	.	.	.	0,0,0	22	5.48794	5.4314	6.57821	8.24368	7	7	8	9	9.34461e-05	0.000186378	0.00271474	0.0160889
14	15660000	15665000	14	15785000	15790000	.	.	.	.	0,0,0	14	3.68768	4.8747	3.34086	3.50227	5	6	5	5	0.00871876	0.0356873	0.0211163	0.0239566
14	15660000	15665000	14	16050000	16055000	.	.	.	.	0,0,0	20	5.9536	6.348	8.72746	8.71799	7	8	9	9	0.000595801	0.00552989	0.0479493	0.0503354
14	18580000	18585000	14	18795000	18800000	.	.	.	.	0,0,0	21	4.29859	4.28155	4.6088	4.0573	6	6	6	6	2.79519e-05	5.8423e-05	8.29506e-05	8.12278e-05
14	18755000	18760000	14	18790000	18795000	.	.	.	.	0,0,0	12	2.23608	3.50163	2.44621	2.34061	3	5	3	3	0.00902681	0.0690511	0.0224015	0.0224049
14	18795000	18800000	14	18975000	18980000	.	.	.	.	0,0,0	43	8.97903	12.4069	14.6367	14.9262	9	11	11	11	2.31071e-12	3.54131e-07	8.02896e-07	8.82242e-07
14	18795000	18800000	14	18985000	18990000	.	.	.	.	0,0,0	22	5.8725	6.86049	9.51472	10.3164	7	8	9	10	9.34461e-05	0.00131262	0.0153007	0.0805399
14	18795000	18800000	14	18990000	18995000	.	.	.	.	0,0,0	53	12.4922	12.6094	18.787	16.6685	11	11	12	12	7.09913e-12	1.38916e-11	3.49212e-08	3.50205e-08
14	18795000	18800000	14	19035000	19040000	.	.	.	.	0,0,0	44	8.95316	10.4286	9.87113	15.7953	9	10	10	12	6.61657e-13	7.32991e-10	1.27356e-09	4.56896e-05
14	18795000	18800000	14	19040000	19045000	.	.	.	.	0,0,0	15	4.3537	4.73772	5.16018	5.17962	6	6	7	7	0.0107279	0.0174153	0.0779212	0.0788116
14	18795000	18800000	14	20405000	20410000	.	.	.	.	0,0,0	13	2.00882	2.47201	2.70985	1.54237	3	3	4	1	0.00279279	0.00654614	0.0195784	0.000423898
14	18990000	18995000	14	19035000	19040000	.	.	.	.	0,0,0	31	14.3561	13.2222	8.91777	14.7865	11	11	9	11	0.00210759	0.00256187	1.52064e-05	0.00594302
14	19035000	19040000	14	20640000	20645000	.	.	.	.	0,0,0	10	1.81795	1.47574	1.86728	1.37371	2	1	2	1	0.0365757	0.0333707	0.068945	0.029624
14	19140000	19145000	14	19420000	19425000	.	.	.	.	0,0,0	16	3.08353	2.67994	4.13731	3.85283	4	4	6	5	0.000268037	0.000542519	0.0124265	0.0035613
14	19140000	19145000	14	19430000	19435000	.	.	.	.	0,0,0	17	4.29447	3.28458	5.58185	4.76617	6	5	7	6	0.00197485	0.000994097	0.0209371	0.00571705
14	20045000	20050000	14	20405000	20410000	.	.	.	.	0,0,0	23	6.09186	5.00954	7.75161	3.79986	7	7	8	5	3.42638e-05	7.1809e-05	0.00126515	5.44943e-07
14	20405000	20410000	14	20485000	20490000	.	.	.	.	0,0,0	25	8.39033	9.97534	9.75842	12.0346	9	10	9	10	0.000657915	0.00803229	0.00214828	0.0189756
14	20405000	20410000	14	20535000	20540000	.	.	.	.	0,0,0	22	4.36282	5.26687	6.5576	3.53431	6	7	8	5	8.79751e-06	0.000186378	0.00271474	2.06098e-06
14	20405000	20410000	14	20540000	20545000	.	.	.	.	0,0,0	52	9.95221	10.4681	11.8863	10.7107	10	10	10	10	1.8317e-14	3.99054e-14	4.86463e-14	7.14672e-14
14	20405000	20410000	14	20545000	20550000	.	.	.	.	0,0,0	58	12.5402	11.9813	12.1992	15.3278	11	10	10	11	2.38298e-14	9.54545e-18	1.55151e-17	1.29252e-13
14	20405000	20410000	14	20550000	20555000	.	.	.	.	0,0,0	62	12.6363	12.5431	14.7114	19.4363	11	11	11	12	1.68014e-16	6.53241e-16	7.43298e-16	5.43797e-12
14	20405000	20410000	14	20555000	20560000	.	.	.	.	0,0,0	19	7.00803	6.11937	8.20294	8.33093	8	7	9	9	0.00762887	0.0027782	0.0811282	0.0835667
14	20550000	20555000	14	20710000	20715000	.	.	.	.	0,0,0	13	3.52975	3.4008	3.83742	3.86217	5	5	5	5	0.0201229	0.0350944	0.0486373	0.0522406
14	20605000	20610000	14	20640000	20645000	.	.	.	.	0,0,0	21	4.69754	9.97022	7.1032	7.52271	6	10	8	8	2.79519e-05	0.0599944	0.00581603	0.00508086
14	20640000	20645000	14	20720000	20725000	.	.	.	.	0,0,0	20	5.35102	5.79052	5.34032	5.28507	7	7	7	7	0.000595801	0.00125312	0.00186628	0.00181023
14	25925000	25930000	14	26155000	26160000	.	.	.	.	0,0,0	23	6.40693	9.40801	9.33134	5.96555	8	9	9	7	0.000326575	0.00412107	0.00841452	0.000103363
14	25925000	25930000	14	27115000	27120000	.	.	.	.	0,0,0	12	1.50826	2.07746	2.85036	1.7052	1	3	4	2	0.00130973	0.0201631	0.0483231	0.00774442
14	33135000	33140000	14	33405000	33410000	.	.	.	.	0,0,0	16	3.85915	5.15411	5.86284	5.68217	5	7	7	7	0.00124328	0.0236047	0.0419077	0.0437082
14	37600000	37605000	14	37735000	37740000	.	.	.	.	0,0,0	14	3.25229	3.00974	3.73329	3.15374	5	4	5	5	0.00871876	0.00587831	0.0211163	0.0239566
14	37600000	37605000	14	37850000	37855000	.	.	.	.	0,0,0	14	3.91401	3.5472	4.06164	3.66589	5	5	6	5	0.00871876	0.0163433	0.0591247	0.0239566
14	37675000	37680000	14	37740000	37745000	.	.	.	.	0,0,0	31	10.247	12.0487	14.321	10.995	10	10	11	10	9.8328e-05	0.000147501	0.00590373	0.000368122
14	37740000	37745000	14	37800000	37805000	.	.	.	.	0,0,0	30	11.8114	12.7685	16.8832	16.2563	10	11	12	12	0.000210039	0.00450241	0.0799876	0.0855084
14	37765000	37770000	14	37800000	37805000	.	.	.	.	0,0,0	35	8.46239	15.025	11.2224	15.1671	9	11	10	11	5.13126e-08	0.000207326	1.20937e-05	0.000480434
14	37800000	37805000	14	37835000	37840000	.	.	.	.	0,0,0	18	4.01134	8.93776	5.61676	5.94391	6	9	7	7	0.000711911	0.0662561	0.00955531	0.010062
14	38635000	38640000	14	38675000	38680000	.	.	.	.	0,0,0	24	5.79766	7.00557	11.6397	6.2637	7	8	10	8	1.10059e-05	0.000255271	0.0294512	0.000447412
14	38635000	38640000	14	38685000	38690000	.	.	.	.	0,0,0	15	2.18488	3.00344	4.66586	3.1646	3	4	6	5	0.00020407	0.00185495	0.0275802	0.00963794
14	38820000	38825000	14	39170000	39175000	.	.	.	.	0,0,0	10	2.35502	1.71207	1.76667	1.74905	3	2	2	2	0.0605654	0.0732432	0.068945	0.0743431
14	44860000	44865000	14	44940000	44945000	.	.	.	.	0,0,0	21	5.36561	6.86105	7.3497	9.35498	7	8	8	9	0.000236683	0.00266206	0.00581603	0.029154
14	44885000	44890000	14	45040000	45045000	.	.	.	.	0,0,0	12	2.92722	3.37989	3.24783	2.90232	4	5	5	4	0.0209391	0.0690511	0.0986332	0.0489862
14	44935000	44940000	14	45040000	45045000	.	.	.	.	0,0,0	16	5.11702	5.13679	4.82273	4.43162	7	7	6	6	0.0151448	0.0236047	0.0124265	0.0132102
14	44800000	44805000	14	44880000	44885000	.	.	.	.	0,0,0	16	5.18815	4.74662	3.51963	6.00495	7	6	5	7	0.0151448	0.00815994	0.00314124	0.0437082
14	44800000	44805000	14	44890000	44895000	.	.	.	.	0,0,0	15	5.37208	4.10043	4.90115	5.41432	7	6	6	7	0.0291065	0.0174153	0.0275802	0.0788116
14	44800000	44805000	14	44935000	44940000	.	.	.	.	0,0,0	20	7.67938	6.84444	9.45748	8.67228	8	8	9	9	0.00365306	0.00552989	0.0479493	0.0503354
14	44890000	44895000	14	44935000	44940000	.	.	.	.	0,0,0	20	4.26752	6.27691	8.15035	5.65156	6	8	9	7	8.77235e-05	0.00552989	0.0479493	0.00181023
14	48035000	48040000	14	48240000	48245000	.	.	.	.	0,0,0	11	1.57411	1.91134	2.18185	2.29124	1	2	3	3	0.0056938	0.0253787	0.0538051	0.0568751
14	51420000	51425000	14	51645000	51650000	.	.	.	.	0,0,0	19	2.83433	4.27342	6.27776	7.33511	4	6	8	8	5.56238e-06	0.000566444	0.0225188	0.0214388
14	51425000	51430000	14	51645000	51650000	.	.	.	.	0,0,0	18	2.7147	3.40564	4.71237	5.41206	4	5	6	7	1.92072e-05	0.00032402	0.00223808	0.010062
14	55505000	55510000	14	55560000	55565000	.	.	.	.	0,0,0	15	5.38232	5.74347	5.89956	6.03473	7	7	7	7	0.0291065	0.0443084	0.0779212	0.0788116
14	55510000	55515000	14	55615000	55620000	.	.	.	.	0,0,0	24	7.12015	9.47321	10.1603	11.1327	8	9	10	10	0.000133047	0.00206957	0.0294512	0.0318924
14	55545000	55550000	14	55615000	55620000	.	.	.	.	0,0,0	36	13.2502	16.2343	17.7733	15.2713	11	12	12	11	7.05814e-05	0.00245952	0.00572233	0.000236202
14	55555000	55560000	14	55615000	55620000	.	.	.	.	0,0,0	17	5.46219	5.9653	7.36453	7.32843	7	7	8	8	0.00735115	0.0124709	0.0725713	0.0701872
14	55755000	55760000	14	55790000	55795000	.	.	.	.	0,0,0	13	2.31813	3.68606	3.74904	3.33736	3	5	5	5	0.00279279	0.0350944	0.0486373	0.0522406
14	58830000	58835000	14	58985000	58990000	.	.	.	.	0,0,0	15	4.0781	3.78226	3.78793	4.94984	6	5	5	6	0.0107279	0.00690573	0.00832192	0.0288497
14	58850000	58855000	14	59005000	59010000	.	.	.	.	0,0,0	15	4.87713	4.40336	5.18087	4.20286	6	6	7	6	0.0107279	0.0174153	0.0779212	0.0288497
14	58905000	58910000	14	58940000	58945000	.	.	.	.	0,0,0	31	10.6318	15.4004	15.5653	12.6757	10	11	12	11	9.8328e-05	0.00256187	0.0549939	0.00594302
14	60040000	60045000	14	60125000	60130000	.	.	.	.	0,0,0	19	4.36869	5.887	7.05561	6.90761	6	7	8	8	0.000269132	0.0027782	0.0225188	0.0214388
14	60040000	60045000	14	60140000	60145000	.	.	.	.	0,0,0	16	3.54598	3.76918	4.1318	3.66852	5	5	6	5	0.00124328	0.00256764	0.0124265	0.0035613
14	60040000	60045000	14	60150000	60155000	.	.	.	.	0,0,0	15	3.87061	3.74024	4.40614	4.86148	5	5	6	6	0.00346019	0.00690573	0.0275802	0.0288497
14	60965000	60970000	14	61000000	61005000	.	.	.	.	0,0,0	24	8.97999	6.42651	10.3588	5.06047	9	8	10	7	0.00139856	0.000255271	0.0294512	3.59681e-05
14	62715000	62720000	14	62915000	62920000	.	.	.	.	0,0,0	25	6.45723	6.32411	5.66869	11.0651	8	8	7	10	5.23604e-05	0.000106803	1.16326e-05	0.0189756
14	65310000	65315000	14	65400000	65405000	.	.	.	.	0,0,0	17	5.23025	5.5439	7.59983	5.97977	7	7	8	7	0.00735115	0.0124709	0.0725713	0.0222102
14	65330000	65335000	14	65400000	65405000	.	.	.	.	0,0,0	33	11.7729	11.5653	7.32987	13.67	10	10	8	11	1.86509e-05	3.12467e-05	3.46829e-08	0.00180921
14	65330000	65335000	14	65490000	65495000	.	.	.	.	0,0,0	13	3.09543	3.03628	2.98176	2.95606	4	4	4	4	0.00846838	0.0159952	0.0195784	0.0198157
14	65340000	65345000	14	65400000	65405000	.	.	.	.	0,0,0	20	7.30355	5.40833	5.65299	6.19461	8	7	7	7	0.00365306	0.00125312	0.00186628	0.00181023
14	65400000	65405000	14	65450000	65455000	.	.	.	.	0,0,0	19	9.02256	7.78354	6.62165	7.71894	9	8	8	8	0.033828	0.0110845	0.0225188	0.0214388
14	65400000	65405000	14	65585000	65590000	.	.	.	.	0,0,0	22	8.85979	7.04331	7.86913	5.93365	9	8	9	7	0.0054492	0.00131262	0.0153007	0.000261144
14	65490000	65495000	14	65570000	65575000	.	.	.	.	0,0,0	23	5.99056	5.57822	5.60137	7.39046	7	7	7	8	3.42638e-05	7.1809e-05	0.000100436	0.00108839
14	65575000	65580000	14	65910000	65915000	.	.	.	.	0,0,0	13	1.53151	2.16129	2.22057	3.48386	1	3	3	5	0.000265012	0.00654614	0.00773561	0.0522406
14	65585000	65590000	14	65700000	65705000	.	.	.	.	0,0,0	15	3.03748	3.43452	4.09432	5.47931	4	5	6	7	0.000962873	0.00690573	0.0275802	0.0788116
14	66960000	66965000	14	67240000	67245000	.	.	.	.	0,0,0	19	4.50221	3.6243	4.37744	6.16481	6	5	6	7	0.000269132	0.000100417	0.000831562	0.00453518
14	67055000	67060000	14	67130000	67135000	.	.	.	.	0,0,0	21	4.16624	5.58669	6.77036	6.02539	6	7	8	7	2.79519e-05	0.000498246	0.00581603	0.000745968
14	67130000	67135000	14	67240000	67245000	.	.	.	.	0,0,0	23	8.40423	8.70001	9.32105	11.6763	9	9	9	10	0.00280214	0.00412107	0.00841452	0.051787
14	67155000	67160000	14	67240000	67245000	.	.	.	.	0,0,0	31	11.8483	13.4209	13.5863	16.6537	10	11	11	12	9.8328e-05	0.00256187	0.00590373	0.0597068
14	67240000	67245000	14	67290000	67295000	.	.	.	.	0,0,0	35	16.583	15.1273	17.0769	15.8289	12	11	12	12	0.00443712	0.000207326	0.00995103	0.0106003
14	67240000	67245000	14	67295000	67300000	.	.	.	.	0,0,0	35	24.0684	19.862	17.9144	18.3426	13	13	12	12	0.0717533	0.0609903	0.00995103	0.0106003
14	67240000	67245000	14	67415000	67420000	.	.	.	.	0,0,0	22	12.3409	10.0188	10.0194	12.0975	10	10	10	10	0.0353406	0.0377448	0.0787497	0.0805399
14	67240000	67245000	14	67425000	67430000	.	.	.	.	0,0,0	25	8.4939	6.25072	9.68133	7.33923	9	8	9	8	0.000657915	0.000106803	0.00214828	0.000177305
14	68865000	68870000	14	69335000	69340000	.	.	.	.	0,0,0	15	2.27891	1.67259	2.72991	2.41355	3	2	4	3	0.00020407	7.64417e-05	0.00238489	0.000640135
14	69335000	69340000	14	69525000	69530000	.	.	.	.	0,0,0	16	3.04891	3.43222	6.06574	4.0469	4	5	7	6	0.000268037	0.00256764	0.0419077	0.0132102
14	69335000	69340000	14	69530000	69535000	.	.	.	.	0,0,0	14	3.30162	3.28433	4.84989	3.76024	5	5	6	5	0.00871876	0.0163433	0.0591247	0.0239566
14	69335000	69340000	14	70155000	70160000	.	.	.	.	0,0,0	18	2.17751	2.1416	3.06929	2.9908	3	3	4	4	2.0082e-06	6.68832e-06	4.80009e-05	4.48753e-05
14	69335000	69340000	14	70160000	70165000	.	.	.	.	0,0,0	19	2.30577	2.43823	3.53359	2.78868	3	3	5	4	3.6129e-07	1.50934e-06	9.6188e-05	1.16697e-05
14	71295000	71300000	14	71360000	71365000	.	.	.	.	0,0,0	33	11.8241	14.0604	11.1878	17.5015	10	11	10	12	1.86509e-05	0.000751241	6.45432e-05	0.0263629
14	73685000	73690000	14	73790000	73795000	.	.	.	.	0,0,0	18	5.1989	4.73018	5.38949	5.05152	7	6	7	7	0.00326602	0.00136262	0.00955531	0.010062
14	73695000	73700000	14	73760000	73765000	.	.	.	.	0,0,0	22	4.35158	6.10423	9.22327	5.76653	6	7	9	7	8.79751e-06	0.000186378	0.0153007	0.000261144
14	73695000	73700000	14	73800000	73805000	.	.	.	.	0,0,0	17	4.52381	4.38467	4.97612	4.19358	6	6	7	6	0.00197485	0.00372722	0.0209371	0.00571705
14	73815000	73820000	14	74010000	74015000	.	.	.	.	0,0,0	21	3.80533	2.74442	4.5013	2.51295	5	4	6	4	2.62742e-06	3.44854e-07	8.29506e-05	3.85632e-07
14	74025000	74030000	14	74080000	74085000	.	.	.	.	0,0,0	17	5.82325	5.93993	7.14202	7.03459	7	7	8	8	0.00735115	0.0124709	0.0725713	0.0701872
14	74065000	74070000	14	74105000	74110000	.	.	.	.	0,0,0	30	9.27595	10.5106	12.7295	13.2727	9	10	11	11	8.73644e-06	0.000301853	0.0103142	0.0103054
14	79420000	79425000	14	79460000	79465000	.	.	.	.	0,0,0	14	2.7266	3.74724	2.50038	2.93131	4	5	4	4	0.00312035	0.0163433	0.00793464	0.00726851
14	81080000	81085000	14	81185000	81190000	.	.	.	.	0,0,0	14	3.01462	2.30764	1.67955	2.98466	4	3	2	4	0.00312035	0.00211409	0.000500297	0.00726851
14	81110000	81115000	14	81235000	81240000	.	.	.	.	0,0,0	15	3.49126	4.14893	5.43379	4.88337	5	6	7	6	0.00346019	0.0174153	0.0779212	0.0288497
14	81110000	81115000	14	81330000	81335000	.	.	.	.	0,0,0	14	1.8015	2.37421	1.87394	3.1659	2	3	2	5	0.000210062	0.00211409	0.000500297	0.0239566
14	81330000	81335000	14	81455000	81460000	.	.	.	.	0,0,0	17	4.71745	3.58242	3.14842	2.98022	6	5	5	4	0.00197485	0.000994097	0.00113376	0.000174104
14	81455000	81460000	14	81495000	81500000	.	.	.	.	0,0,0	16	2.07602	3.06324	4.99204	2.20492	3	4	7	3	4.9252e-05	0.000542519	0.0419077	0.000151239
14	81455000	81460000	14	81600000	81605000	.	.	.	.	0,0,0	13	2.20994	2.59449	3.61059	1.56865	3	4	5	1	0.00279279	0.0159952	0.0486373	0.000423898
14	81455000	81460000	14	81610000	81615000	.	.	.	.	0,0,0	16	1.95393	2.49433	2.38467	1.88766	2	3	3	2	6.88078e-06	0.000151416	0.000151215	1.77855e-05
14	81455000	81460000	14	81615000	81620000	.	.	.	.	0,0,0	31	2.6258	3.27459	4.06608	5.18869	4	5	6	7	1.93644e-15	6.28031e-13	4.29772e-11	4.21444e-09
14	94070000	94075000	14	94105000	94110000	.	.	.	.	0,0,0	12	1.99062	2.64929	3.21935	2.29896	3	4	5	3	0.00902681	0.0353788	0.0986332	0.0224049
15	215000	220000	15	350000	355000	.	.	.	.	0,0,0	18	3.01513	3.8462	3.36801	5.21921	4	5	5	7	1.92072e-05	0.00032402	0.000344693	0.010062
15	225000	230000	15	260000	265000	.	.	.	.	0,0,0	14	3.57245	4.36745	4.72819	3.80619	5	6	6	5	0.00871876	0.0356873	0.0591247	0.0239566
15	285000	290000	15	350000	355000	.	.	.	.	0,0,0	20	5.00607	6.17842	5.49387	9.78237	7	7	7	9	0.000595801	0.00125312	0.00186628	0.0503354
15	300000	305000	15	350000	355000	.	.	.	.	0,0,0	21	5.86513	5.82559	6.20829	9.14322	7	7	7	9	0.000236683	0.000498246	0.000729734	0.029154
15	370000	375000	15	405000	410000	.	.	.	.	0,0,0	19	5.32029	7.56034	9.34658	5.70761	7	8	9	7	0.00143139	0.0110845	0.0811282	0.00453518
15	545000	550000	15	645000	650000	.	.	.	.	0,0,0	16	4.26489	4.10645	4.58901	5.03491	6	6	6	7	0.00461177	0.00815994	0.0124265	0.0437082
15	645000	650000	15	700000	705000	.	.	.	.	0,0,0	15	2.51487	2.63146	3.08757	3.35676	4	4	4	5	0.000962873	0.00185495	0.00238489	0.00963794
15	645000	650000	15	740000	745000	.	.	.	.	0,0,0	17	2.34101	3.39428	4.27144	5.93574	3	5	6	7	1.05904e-05	0.000994097	0.00586356	0.0222102
15	1490000	1495000	15	2345000	2350000	.	.	.	.	0,0,0	14	2.77366	2.69191	3.3292	3.09333	4	4	5	4	0.00312035	0.00587831	0.0211163	0.00726851
15	2310000	2315000	15	2345000	2350000	.	.	.	.	0,0,0	13	2.81866	4.69683	2.83455	3.55851	4	6	4	5	0.00846838	0.0652956	0.0195784	0.0522406
15	2345000	2350000	15	2390000	2395000	.	.	.	.	0,0,0	26	7.78421	8.71426	9.00396	13.1945	8	9	9	11	1.93359e-05	0.00045167	0.00104429	0.0691806
15	2345000	2350000	15	2495000	2500000	.	.	.	.	0,0,0	21	5.3399	5.07016	2.85682	6.89487	7	7	4	8	0.000236683	0.000498246	5.49096e-07	0.00508086
15	2345000	2350000	15	2585000	2590000	.	.	.	.	0,0,0	19	5.69209	5.30845	5.236	5.73542	7	7	7	7	0.00143139	0.0027782	0.00440181	0.00453518
15	2390000	2395000	15	2495000	2500000	.	.	.	.	0,0,0	15	4.84066	4.29143	6.19356	3.54509	6	6	7	5	0.0107279	0.0174153	0.0779212	0.00963794
15	2455000	2460000	15	2495000	2500000	.	.	.	.	0,0,0	20	10.7151	9.41257	8.26492	7.09319	10	9	9	8	0.0900515	0.0239339	0.0479493	0.010513
15	2455000	2460000	15	2585000	2590000	.	.	.	.	0,0,0	18	5.46254	5.11813	3.73448	6.26822	7	7	5	8	0.00326602	0.00597717	0.000344693	0.0395652
15	2455000	2460000	15	2595000	2600000	.	.	.	.	0,0,0	16	4.96163	4.28015	3.19387	4.66204	7	6	5	6	0.0151448	0.00815994	0.00314124	0.0132102
15	2495000	2500000	15	2570000	2575000	.	.	.	.	0,0,0	28	8.91651	9.44439	12.0561	13.4647	9	9	10	11	5.39532e-05	9.23762e-05	0.00269227	0.0287996
15	2495000	2500000	15	2590000	2595000	.	.	.	.	0,0,0	24	8.42707	8.32816	11.7857	8.43876	9	9	10	9	0.00139856	0.00206957	0.0294512	0.00427756
15	2525000	2530000	15	2570000	2575000	.	.	.	.	0,0,0	43	12.9857	14.7848	21.5006	17.8548	11	11	13	12	2.13917e-07	3.54131e-07	0.00441819	9.51877e-05
15	5180000	5185000	15	5215000	5220000	.	.	.	.	0,0,0	20	5.82617	7.32258	7.65661	6.68986	7	8	8	8	0.000595801	0.00552989	0.0117797	0.010513
15	5180000	5185000	15	5245000	5250000	.	.	.	.	0,0,0	40	13.1552	13.1229	19.502	17.0645	11	11	12	12	2.89359e-06	4.70879e-06	0.000608558	0.000650675
15	5195000	5200000	15	5240000	5245000	.	.	.	.	0,0,0	16	3.66411	5.12074	5.81995	5.78286	5	7	7	7	0.00124328	0.0236047	0.0419077	0.0437082
15	5195000	5200000	15	5245000	5250000	.	.	.	.	0,0,0	29	6.90485	8.57687	11.0564	10.5152	8	9	10	10	8.33648e-07	3.74098e-05	0.00133429	0.00154329
15	5245000	5250000	15	5295000	5300000	.	.	.	.	0,0,0	34	16.6787	18.0108	14.823	18.822	12	12	11	12	0.00745666	0.00689358	0.000880541	0.0168279
15	5295000	5300000	15	5330000	5335000	.	.	.	.	0,0,0	22	6.96822	10.6058	10.912	8.82756	8	10	10	9	0.000735879	0.0377448	0.0787497	0.0160889
15	5425000	5430000	15	5540000	5545000	.	.	.	.	0,0,0	12	2.34351	2.47613	3.44034	2.21451	3	3	5	3	0.00902681	0.0201631	0.0986332	0.0224049
15	5850000	5855000	15	5885000	5890000	.	.	.	.	0,0,0	23	5.34813	10.7622	7.45249	6.63279	7	10	8	8	3.42638e-05	0.0232949	0.00126515	0.00108839
15	6335000	6340000	15	6620000	6625000	.	.	.	.	0,0,0	11	2.45057	2.23619	2.13813	1.83261	3	3	3	2	0.0246042	0.0472408	0.0538051	0.0255303
15	6680000	6685000	15	6725000	6730000	.	.	.	.	0,0,0	28	4.87496	7.81475	9.76851	10.7569	6	8	9	10	3.18613e-09	5.47935e-06	0.00021104	0.00303266
15	6680000	6685000	15	6730000	6735000	.	.	.	.	0,0,0	33	5.63098	7.97485	6.04481	14.727	7	9	7	11	1.16252e-10	7.80281e-07	2.5569e-10	0.00180921
15	16000000	16005000	15	16085000	16090000	.	.	.	.	0,0,0	25	8.26229	8.77351	10.0617	8.3675	9	9	10	9	0.000657915	0.000982892	0.0174733	0.00202776
15	16040000	16045000	15	16075000	16080000	.	.	.	.	0,0,0	39	9.93037	13.3309	10.1626	12.409	10	11	10	11	7.0096e-08	1.06053e-05	2.78164e-07	2.46565e-05
15	16040000	16045000	15	16085000	16090000	.	.	.	.	0,0,0	38	14.5758	17.9944	21.563	22.0459	11	12	13	13	1.46076e-05	0.00077613	0.0371362	0.0372047
15	16045000	16050000	15	16085000	16090000	.	.	.	.	0,0,0	43	11.201	17.0578	22.0667	20.775	10	12	13	13	1.01259e-09	3.21388e-05	0.00441819	0.00465315
15	16050000	16055000	15	16085000	16090000	.	.	.	.	0,0,0	75	17.8044	26.0063	22.3745	26.0556	12	14	13	14	2.60237e-19	4.23199e-10	8.80429e-14	1.15791e-09
15	16075000	16080000	15	16120000	16125000	.	.	.	.	0,0,0	18	4.24776	5.43104	5.47494	5.60268	6	7	7	7	0.000711911	0.00597717	0.00955531	0.010062
15	16085000	16090000	15	16120000	16125000	.	.	.	.	0,0,0	26	6.98254	9.51958	9.07851	8.76225	8	9	9	9	1.93359e-05	0.00045167	0.00104429	0.000948172
15	17185000	17190000	15	17270000	17275000	.	.	.	.	0,0,0	23	8.6362	8.02365	6.83248	9.67604	9	9	8	9	0.00280214	0.00412107	0.00126515	0.0085689
15	17185000	17190000	15	17280000	17285000	.	.	.	.	0,0,0	27	11.1445	10.0963	10.9569	11.139	10	10	10	10	0.00183564	0.00243569	0.00512333	0.00579741
15	17185000	17190000	15	17285000	17290000	.	.	.	.	0,0,0	17	6.16526	5.61399	6.51488	6.42069	7	7	8	8	0.00735115	0.0124709	0.0725713	0.0701872
15	17195000	17200000	15	17270000	17275000	.	.	.	.	0,0,0	22	6.30871	6.64313	6.77381	8.08368	8	8	8	9	0.000735879	0.00131262	0.00271474	0.0160889
15	17280000	17285000	15	17505000	17510000	.	.	.	.	0,0,0	33	9.88954	10.0481	8.88513	14.8635	10	10	9	11	1.86509e-05	3.12467e-05	2.09885e-06	0.00180921
15	17505000	17510000	15	17710000	17715000	.	.	.	.	0,0,0	17	9.2076	7.76428	6.85764	6.3169	9	8	8	8	0.0947081	0.0372598	0.0725713	0.0701872
15	17505000	17510000	15	17790000	17795000	.	.	.	.	0,0,0	21	9.71212	6.7595	6.21317	9.65836	9	8	7	9	0.0104689	0.00266206	0.000729734	0.029154
15	17505000	17510000	15	17825000	17830000	.	.	.	.	0,0,0	25	12.4859	8.58879	11.0354	7.37512	11	9	10	8	0.0499474	0.000982892	0.0174733	0.000177305
15	17520000	17525000	15	17790000	17795000	.	.	.	.	0,0,0	15	4.94981	4.19307	5.48779	5.38693	6	6	7	7	0.0107279	0.0174153	0.0779212	0.0788116
15	17710000	17715000	15	17790000	17795000	.	.	.	.	0,0,0	17	6.54305	6.91768	7.34121	5.64014	8	8	8	7	0.0279685	0.0372598	0.0725713	0.0222102
15	17995000	18000000	15	18040000	18045000	.	.	.	.	0,0,0	24	7.0474	8.5824	9.78276	9.41021	8	9	9	9	0.000133047	0.00206957	0.00452125	0.00427756
15	17995000	18000000	15	18225000	18230000	.	.	.	.	0,0,0	27	5.11444	6.74858	8.17743	7.4555	7	8	9	8	3.24471e-07	1.53397e-05	0.00049474	2.53e-05
15	18225000	18230000	15	18260000	18265000	.	.	.	.	0,0,0	37	7.53787	8.6638	5.46684	11.839	8	9	7	10	5.24704e-11	1.02993e-08	6.65958e-13	2.23704e-06
15	19030000	19035000	15	19140000	19145000	.	.	.	.	0,0,0	15	4.6961	4.52385	5.94824	4.43487	6	6	7	6	0.0107279	0.0174153	0.0779212	0.0288497
15	19235000	19240000	15	19270000	19275000	.	.	.	.	0,0,0	12	2.7335	3.16689	2.60173	2.89265	4	5	4	4	0.0209391	0.0690511	0.0483231	0.0489862
15	27070000	27075000	15	27130000	27135000	.	.	.	.	0,0,0	23	6.73089	6.70307	6.93139	8.46021	8	8	8	9	0.000326575	0.000599721	0.00126515	0.0085689
15	27700000	27705000	15	27760000	27765000	.	.	.	.	0,0,0	21	4.85476	6.26783	7.37581	7.5328	6	8	8	8	2.79519e-05	0.00266206	0.00581603	0.00508086
15	27760000	27765000	15	27795000	27800000	.	.	.	.	0,0,0	24	5.53735	8.80405	11.346	6.32439	7	9	10	8	1.10059e-05	0.00206957	0.0294512	0.000447412
15	28305000	28310000	15	28385000	28390000	.	.	.	.	0,0,0	17	2.9179	2.79637	4.07397	3.50468	4	4	6	5	7.70591e-05	0.000149312	0.00586356	0.00138412
15	28420000	28425000	15	28495000	28500000	.	.	.	.	0,0,0	23	7.28844	7.82676	8.79425	7.05011	8	8	9	8	0.000326575	0.000599721	0.00841452	0.00108839
15	29525000	29530000	15	29575000	29580000	.	.	.	.	0,0,0	18	7.007	6.51206	7.82635	7.15622	8	8	8	8	0.0149558	0.020608	0.0405628	0.0395652
15	29525000	29530000	15	29625000	29630000	.	.	.	.	0,0,0	17	4.46767	4.20466	4.81495	6.35783	6	6	6	8	0.00197485	0.00372722	0.00586356	0.0701872
15	29570000	29575000	15	29610000	29615000	.	.	.	.	0,0,0	26	5.96782	8.20738	9.39947	13.6984	7	9	9	11	1.07353e-06	0.00045167	0.00104429	0.0691806
15	29575000	29580000	15	29610000	29615000	.	.	.	.	0,0,0	56	6.69637	12.8818	9.9936	11.2579	8	11	10	10	9.87145e-25	5.35813e-13	2.49741e-16	3.24313e-16
15	29575000	29580000	15	29615000	29620000	.	.	.	.	0,0,0	27	5.93159	8.19621	12.3126	14.0218	7	9	10	11	3.24471e-07	0.000208112	0.00512333	0.0456097
15	29575000	29580000	15	29620000	29625000	.	.	.	.	0,0,0	22	8.53401	9.25328	9.3475	11.4162	9	9	9	10	0.0054492	0.00767982	0.0153007	0.0805399
15	29750000	29755000	15	29785000	29790000	.	.	.	.	0,0,0	27	10.815	10.364	9.87614	13.3618	10	10	10	11	0.00183564	0.00243569	0.00512333	0.0456097
15	30290000	30295000	15	30335000	30340000	.	.	.	.	0,0,0	18	2.49144	3.6836	5.48455	3.42473	3	5	7	5	2.0082e-06	0.00032402	0.00955531	0.000390363
15	30320000	30325000	15	30730000	30735000	.	.	.	.	0,0,0	16	3.11386	3.56984	2.43671	4.64781	4	5	3	6	0.000268037	0.00256764	0.000151215	0.0132102
15	30350000	30355000	15	30410000	30415000	.	.	.	.	0,0,0	15	5.11989	5.61036	3.51124	2.91927	7	7	5	4	0.0291065	0.0443084	0.00832192	0.00248769
15	30625000	30630000	15	30680000	30685000	.	.	.	.	0,0,0	19	6.59513	7.79946	9.13804	3.98862	8	8	9	6	0.00762887	0.0110845	0.0811282	0.000789944
15	30665000	30670000	15	30715000	30720000	.	.	.	.	0,0,0	37	12.2433	17.3038	21.0669	19.3271	10	12	13	12	4.93615e-07	0.0013852	0.05285	0.00363813
15	30665000	30670000	15	30730000	30735000	.	.	.	.	0,0,0	30	11.3613	11.6817	16.3453	18.2923	10	10	12	12	0.000210039	0.000301853	0.0799876	0.0855084
15	30665000	30670000	15	30735000	30740000	.	.	.	.	0,0,0	22	9.46203	8.65757	10.1595	11.1154	9	9	10	10	0.0054492	0.00767982	0.0787497	0.0805399
15	30665000	30670000	15	30740000	30745000	.	.	.	.	0,0,0	49	18.0614	17.5237	19.8854	23.5129	12	12	13	13	2.75987e-07	3.47347e-07	0.000154891	0.000169831
15	30670000	30675000	15	30735000	30740000	.	.	.	.	0,0,0	17	4.28243	4.63631	5.00329	7.50431	6	6	7	8	0.00197485	0.00372722	0.0209371	0.0701872
15	30680000	30685000	15	30715000	30720000	.	.	.	.	0,0,0	53	21.3712	25.375	26.9882	22.2814	13	14	14	13	4.02812e-06	0.000693336	0.00148348	1.2272e-05
15	30680000	30685000	15	30725000	30730000	.	.	.	.	0,0,0	38	10.0772	14.6128	13.8189	22.268	10	11	11	13	1.83632e-07	2.26092e-05	5.21903e-05	0.0372047
15	30680000	30685000	15	30740000	30745000	.	.	.	.	0,0,0	61	23.5957	22.2352	22.5571	25.7712	13	13	13	14	9.38025e-09	9.52682e-09	3.74366e-08	2.54087e-05
15	30680000	30685000	15	30745000	30750000	.	.	.	.	0,0,0	30	14.2193	14.6016	17.5243	17.3646	11	11	12	12	0.00383566	0.00450241	0.0799876	0.0855084
15	30665000	30670000	15	31695000	31700000	.	.	.	.	0,0,0	13	2.84933	3.03364	3.28045	2.61201	4	4	5	4	0.00846838	0.0159952	0.0486373	0.0198157
15	31600000	31605000	15	31695000	31700000	.	.	.	.	0,0,0	28	7.72649	9.59872	12.8216	9.52653	8	9	11	9	2.43993e-06	9.23762e-05	0.0287076	0.000187249
15	31600000	31605000	15	31750000	31755000	.	.	.	.	0,0,0	17	4.8338	5.29439	6.77706	6.46559	6	7	8	8	0.00197485	0.0124709	0.0725713	0.0701872
15	31640000	31645000	15	31685000	31690000	.	.	.	.	0,0,0	17	7.31111	6.48159	7.50364	6.3535	8	8	8	8	0.0279685	0.0372598	0.0725713	0.0701872
15	31640000	31645000	15	31695000	31700000	.	.	.	.	0,0,0	44	7.96176	10.2353	13.7003	13.95	9	10	11	11	6.61657e-13	7.32991e-10	3.3323e-07	3.50937e-07
15	31640000	31645000	15	31750000	31755000	.	.	.	.	0,0,0	26	6.68239	6.73485	7.80749	7.00937	8	8	8	8	1.93359e-05	4.27594e-05	8.40075e-05	6.84484e-05
15	31685000	31690000	15	31730000	31735000	.	.	.	.	0,0,0	21	6.16239	10.4279	9.78489	8.53156	7	10	9	9	0.000236683	0.0599944	0.0277717	0.029154
15	31695000	31700000	15	31730000	31735000	.	.	.	.	0,0,0	56	14.0919	28.5018	22.3834	18.4585	11	14	13	12	2.35893e-13	0.000140277	1.59775e-06	2.23261e-09
15	31695000	31700000	15	31750000	31755000	.	.	.	.	0,0,0	80	16.5814	21.6022	23.0118	37.4655	12	13	13	15	4.54153e-22	9.17834e-17	9.3925e-16	1.57595e-07
15	31695000	31700000	15	31805000	31810000	.	.	.	.	0,0,0	22	8.18064	9.78407	10.9917	10.0415	9	9	10	10	0.0054492	0.00767982	0.0787497	0.0805399
15	31695000	31700000	15	32105000	32110000	.	.	.	.	0,0,0	20	10.2526	6.09175	7.34421	6.50857	10	7	8	8	0.0900515	0.00125312	0.0117797	0.010513
15	31715000	31720000	15	31750000	31755000	.	.	.	.	0,0,0	66	15.5142	23.733	11.757	28.9056	11	13	10	14	9.1216e-19	1.43108e-10	7.6824e-23	1.0816e-06
15	31730000	31735000	15	31765000	31770000	.	.	.	.	0,0,0	17	2.78432	6.88935	3.98545	4.00396	4	8	6	6	7.70591e-05	0.0372598	0.00586356	0.00571705
15	32005000	32010000	15	32080000	32085000	.	.	.	.	0,0,0	15	5.73881	5.53899	5.75538	5.58034	7	7	7	7	0.0291065	0.0443084	0.0779212	0.0788116
15	32035000	32040000	15	32080000	32085000	.	.	.	.	0,0,0	22	6.88634	7.92167	10.9055	9.97539	8	9	10	10	0.000735879	0.00767982	0.0787497	0.0805399
15	32065000	32070000	15	32100000	32105000	.	.	.	.	0,0,0	26	7.75089	13.4819	9.43345	6.52764	8	11	9	8	1.93359e-05	0.0339882	0.00104429	6.84484e-05
15	32080000	32085000	15	32115000	32120000	.	.	.	.	0,0,0	72	26.4183	29.3971	38.2138	24.5486	14	14	15	13	3.4682e-09	4.21594e-09	2.20242e-05	1.94515e-12
15	32105000	32110000	15	32290000	32295000	.	.	.	.	0,0,0	22	7.82802	7.01097	5.60436	9.44434	8	8	7	9	0.000735879	0.00131262	0.0002794	0.0160889
15	32105000	32110000	15	32295000	32300000	.	.	.	.	0,0,0	26	7.366	5.8307	4.85526	10.3813	8	7	6	10	1.93359e-05	2.43209e-06	1.21299e-07	0.0106321
15	32105000	32110000	15	32300000	32305000	.	.	.	.	0,0,0	24	8.29056	6.26633	5.81413	11.5308	9	8	7	10	0.00139856	0.000255271	3.42544e-05	0.0318924
15	32115000	32120000	15	32150000	32155000	.	.	.	.	0,0,0	27	10.3114	14.1164	10.0974	14.0526	10	11	10	11	0.00183564	0.0215097	0.00512333	0.0456097
15	32115000	32120000	15	32155000	32160000	.	.	.	.	0,0,0	45	17.1569	19.604	28.5756	13.4977	12	13	14	11	6.76516e-06	0.000637869	0.0395358	1.40985e-07
15	32115000	32120000	15	32160000	32165000	.	.	.	.	0,0,0	40	13.4881	16.9875	24.3072	13.6602	11	12	13	11	2.89359e-06	0.000233978	0.0167527	1.19731e-05
15	32115000	32120000	15	32165000	32170000	.	.	.	.	0,0,0	48	16.1554	18.1418	21.4753	16.5869	12	12	13	12	6.27937e-07	7.25118e-07	0.000274883	2.19747e-06
15	32115000	32120000	15	32205000	32210000	.	.	.	.	0,0,0	40	9.94584	10.9933	13.2085	13.4711	10	10	11	11	2.53837e-08	5.27872e-08	1.01265e-05	1.19731e-05
15	32115000	32120000	15	32210000	32215000	.	.	.	.	0,0,0	23	8.34576	8.7322	10.5907	11.4175	9	9	10	10	0.00280214	0.00412107	0.0495526	0.051787
15	32115000	32120000	15	32290000	32295000	.	.	.	.	0,0,0	38	12.2804	10.8644	11.5889	14.1306	10	10	10	11	1.83632e-07	3.56594e-07	7.79139e-07	5.35069e-05
15	32115000	32120000	15	32295000	32300000	.	.	.	.	0,0,0	44	11.4289	9.125	10.0821	15.6573	10	9	10	12	3.18694e-10	1.67959e-12	1.27356e-09	4.56896e-05
15	32120000	32125000	15	32300000	32305000	.	.	.	.	0,0,0	17	5.22277	4.1385	4.61221	7.12414	7	6	6	8	0.00735115	0.00372722	0.00586356	0.0701872
15	35375000	35380000	15	35410000	35415000	.	.	.	.	0,0,0	63	12.0457	10.3504	15.5588	13.2396	10	10	11	11	3.59376e-21	5.12467e-21	2.11268e-16	2.86429e-16
15	35375000	35380000	15	35415000	35420000	.	.	.	.	0,0,0	72	15.2793	13.7566	32.0491	11.6268	11	11	15	10	1.91635e-22	1.0588e-21	2.20242e-05	1.13565e-26
15	35375000	35380000	15	35420000	35425000	.	.	.	.	0,0,0	39	13.4793	10.6938	15.667	3.69814	11	10	12	5	6.55908e-06	1.34465e-07	0.00104077	2.06253e-20
15	35375000	35380000	15	35465000	35470000	.	.	.	.	0,0,0	36	9.56946	8.87121	15.5947	10.2938	9	9	12	10	1.68381e-08	3.16863e-08	0.00572233	5.64738e-06
15	35375000	35380000	15	35470000	35475000	.	.	.	.	0,0,0	49	15.0961	13.4544	23.3598	16.362	11	11	13	12	5.49818e-10	9.85594e-10	0.000154891	1.00376e-06
15	35380000	35385000	15	35415000	35420000	.	.	.	.	0,0,0	25	5.09652	7.28107	7.16617	3.12547	7	8	8	4	3.53834e-06	0.000106803	0.000218788	3.14608e-10
15	35410000	35415000	15	35470000	35475000	.	.	.	.	0,0,0	71	24.2982	26.3797	23.5047	43.0442	13	14	13	16	1.2399e-12	8.47919e-09	4.39209e-12	0.00974224
15	35415000	35420000	15	35470000	35475000	.	.	.	.	0,0,0	87	24.7254	26.0201	28.9703	34.3371	14	14	14	15	8.09709e-15	9.43269e-15	3.00511e-14	1.29294e-09
15	35420000	35425000	15	35465000	35470000	.	.	.	.	0,0,0	40	11.0684	12.6876	13.2561	13.219	10	11	11	11	2.53837e-08	4.70879e-06	1.01265e-05	1.19731e-05
15	35420000	35425000	15	35470000	35475000	.	.	.	.	0,0,0	57	17.3964	18.3644	18.2443	21.0365	12	12	12	13	2.01234e-10	3.31968e-10	8.42668e-10	7.17766e-07
15	35425000	35430000	15	35465000	35470000	.	.	.	.	0,0,0	30	12.1424	10.9074	9.89641	9.7871	10	10	10	9	0.000210039	0.000301853	0.000638216	3.14116e-05
15	35425000	35430000	15	35475000	35480000	.	.	.	.	0,0,0	15	6.1734	5.53331	4.50057	3.23052	7	7	6	5	0.0291065	0.0443084	0.0275802	0.00963794
15	35430000	35435000	15	35465000	35470000	.	.	.	.	0,0,0	53	11.068	16.2477	17.9573	12.6343	10	12	12	11	5.64744e-15	1.19545e-08	3.49212e-08	3.50675e-11
15	35430000	35435000	15	35470000	35475000	.	.	.	.	0,0,0	96	19.5138	23.5316	32.3555	28.361	12	13	15	14	1.27202e-31	9.24647e-25	1.88688e-12	4.33249e-18
15	35430000	35435000	15	35475000	35480000	.	.	.	.	0,0,0	29	7.99297	8.92897	8.74504	10.1185	9	9	9	10	2.20184e-05	3.74098e-05	9.31885e-05	0.00154329
15	35430000	35435000	15	35480000	35485000	.	.	.	.	0,0,0	24	13.3228	12.7952	11.4921	11.4588	11	11	10	10	0.0758925	0.0764531	0.0294512	0.0318924
15	35435000	35440000	15	35470000	35475000	.	.	.	.	0,0,0	28	9.58983	13.7503	13.6229	12.6933	9	11	11	11	5.39532e-05	0.013347	0.0287076	0.0287996
15	35375000	35380000	15	35520000	35525000	.	.	.	.	0,0,0	30	10.5792	8.16734	15.5608	7.74822	10	9	11	8	0.000210039	1.58798e-05	0.0103142	8.66373e-07
15	35375000	35380000	15	35545000	35550000	.	.	.	.	0,0,0	57	22.1623	16.9455	32.3419	15.1953	13	12	15	11	1.98909e-07	3.31968e-10	0.0175727	4.32204e-13
15	35375000	35380000	15	35560000	35565000	.	.	.	.	0,0,0	51	14.3958	11.6196	17.6809	12.6752	11	10	12	11	6.49188e-11	1.31502e-13	1.98116e-07	2.90974e-10
15	35375000	35380000	15	35775000	35780000	.	.	.	.	0,0,0	22	6.52978	4.94638	6.22705	3.59973	8	6	7	5	0.000735879	1.75017e-05	0.0002794	2.06098e-06
15	35410000	35415000	15	35545000	35550000	.	.	.	.	0,0,0	55	24.8613	28.8321	32.0152	31.9207	14	14	15	15	0.000256528	0.000239074	0.0326695	0.0305411
15	35410000	35415000	15	35560000	35565000	.	.	.	.	0,0,0	45	16.2234	17.0432	15.7355	26.3761	12	12	12	14	6.76516e-06	7.35597e-06	2.28404e-05	0.0400849
15	35415000	35420000	15	35545000	35550000	.	.	.	.	0,0,0	56	27.4676	28.3684	36.4944	23.7957	14	14	15	13	0.000152361	0.000140277	0.0231585	1.4361e-06
15	35415000	35420000	15	35555000	35560000	.	.	.	.	0,0,0	22	9.78335	9.05246	11.3838	8.46336	9	9	10	9	0.0054492	0.00767982	0.0787497	0.0160889
15	35415000	35420000	15	35560000	35565000	.	.	.	.	0,0,0	54	18.2164	16.8185	18.9417	23.3177	12	12	12	13	3.2624e-09	5.12352e-09	1.45151e-08	6.0783e-06
15	35420000	35425000	15	35540000	35545000	.	.	.	.	0,0,0	18	5.13413	6.04814	7.18176	6.61961	7	7	8	8	0.00326602	0.00597717	0.0405628	0.0395652
15	35420000	35425000	15	35545000	35550000	.	.	.	.	0,0,0	37	16.241	17.5704	21.4807	15.8798	12	12	13	12	0.00139352	0.0013852	0.05285	0.00363813
15	35420000	35425000	15	35560000	35565000	.	.	.	.	0,0,0	38	10.6666	9.90745	10.6785	13.5247	10	10	10	11	1.83632e-07	3.56594e-07	7.79139e-07	5.35069e-05
15	35430000	35435000	15	35545000	35550000	.	.	.	.	0,0,0	51	23.0385	27.2119	30.026	27.7202	13	14	14	14	1.63527e-05	0.00177909	0.00373708	0.00378898
15	35430000	35435000	15	35560000	35565000	.	.	.	.	0,0,0	43	15.8246	16.1745	17.71	22.2246	12	12	12	13	2.93159e-05	3.21388e-05	9.20703e-05	0.00465315
15	35465000	35470000	15	35545000	35550000	.	.	.	.	0,0,0	43	23.0795	23.2029	25.2192	27.055	13	13	14	14	0.00207569	0.00191376	0.0787388	0.0763864
15	35470000	35475000	15	35545000	35550000	.	.	.	.	0,0,0	58	32.434	33.3561	36.2493	37.2502	15	15	15	15	0.0123328	0.00685155	0.0126674	0.0110427
15	35470000	35475000	15	35555000	35560000	.	.	.	.	0,0,0	24	10.9344	10.2103	10.986	11.8349	10	10	10	10	0.0119845	0.0139666	0.0294512	0.0318924
15	35470000	35475000	15	35560000	35565000	.	.	.	.	0,0,0	47	20.3144	19.3863	19.5188	23.9612	13	12	12	13	0.000216701	1.59843e-06	4.97448e-06	0.000543785
15	35480000	35485000	15	35560000	35565000	.	.	.	.	0,0,0	23	8.84596	8.69907	10.8887	11.9335	9	9	10	10	0.00280214	0.00412107	0.0495526	0.051787
15	35510000	35515000	15	35545000	35550000	.	.	.	.	0,0,0	31	8.74795	15.7556	11.258	14.8838	9	12	10	11	3.29237e-06	0.0283883	0.000313698	0.00594302
15	35545000	35550000	15	35775000	35780000	.	.	.	.	0,0,0	23	8.19434	7.4951	7.1928	8.68298	9	8	8	9	0.00280214	0.000599721	0.00126515	0.0085689
15	35685000	35690000	15	35775000	35780000	.	.	.	.	0,0,0	33	9.46184	11.3256	19.4757	8.7708	9	10	12	9	4.30607e-07	3.12467e-05	0.0248815	1.79733e-06
15	35685000	35690000	15	35955000	35960000	.	.	.	.	0,0,0	14	4.75808	4.01489	4.78643	3.38983	6	6	6	5	0.0228825	0.0356873	0.0591247	0.0239566
15	35690000	35695000	15	35775000	35780000	.	.	.	.	0,0,0	31	9.28994	11.29	15.6912	8.85027	9	10	12	9	3.29237e-06	0.000147501	0.0549939	1.22493e-05
15	35690000	35695000	15	35880000	35885000	.	.	.	.	0,0,0	16	3.43194	4.53687	4.12225	3.99167	5	6	6	6	0.00124328	0.00815994	0.0124265	0.0132102
15	35690000	35695000	15	35885000	35890000	.	.	.	.	0,0,0	17	2.02629	2.73374	2.9094	2.66568	3	4	4	4	1.05904e-05	0.000149312	0.000176244	0.000174104
15	35880000	35885000	15	35955000	35960000	.	.	.	.	0,0,0	30	14.138	12.3925	9.53131	13.9493	11	11	9	11	0.00383566	0.00450241	3.85425e-05	0.0103054
15	35895000	35900000	15	35935000	35940000	.	.	.	.	0,0,0	24	6.00972	8.57009	8.60766	10.7028	7	9	9	10	1.10059e-05	0.00206957	0.00452125	0.0318924
15	35955000	35960000	15	36265000	36270000	.	.	.	.	0,0,0	33	7.75253	7.90853	15.7508	8.88259	8	9	12	9	8.53328e-09	7.80281e-07	0.0248815	1.79733e-06
15	38970000	38975000	15	39070000	39075000	.	.	.	.	0,0,0	14	3.19893	4.19402	3.84109	3.90668	5	6	5	5	0.00871876	0.0356873	0.0211163	0.0239566
15	39015000	39020000	15	39070000	39075000	.	.	.	.	0,0,0	33	18.9201	18.6909	13.9185	14.2246	12	12	11	11	0.0123806	0.011366	0.00172605	0.00180921
15	39015000	39020000	15	39145000	39150000	.	.	.	.	0,0,0	32	10.1883	13.3426	13.0547	9.17262	10	11	11	9	4.35595e-05	0.00145406	0.00327101	4.61687e-06
15	39015000	39020000	15	39200000	39205000	.	.	.	.	0,0,0	27	10.7327	9.63203	13.0853	7.73468	10	9	11	8	0.00183564	0.000208112	0.0474394	2.53e-05
15	39025000	39030000	15	39145000	39150000	.	.	.	.	0,0,0	21	6.89163	8.77567	9.68401	5.52356	8	9	9	7	0.00167172	0.0139646	0.0277717	0.000745968
15	39070000	39075000	15	39110000	39115000	.	.	.	.	0,0,0	45	12.8548	16.2597	14.2106	27.192	11	12	11	14	3.11734e-08	7.35597e-06	1.30654e-07	0.0400849
15	39070000	39075000	15	39145000	39150000	.	.	.	.	0,0,0	52	12.3165	15.8076	23.6946	16.1515	10	12	13	12	1.8317e-14	2.79209e-08	2.35525e-05	8.3768e-08
15	39070000	39075000	15	39165000	39170000	.	.	.	.	0,0,0	19	6.57487	7.15655	9.3178	5.86434	8	8	9	7	0.00762887	0.0110845	0.0811282	0.00453518
15	39070000	39075000	15	39310000	39315000	.	.	.	.	0,0,0	15	3.39355	4.0258	4.77502	5.71086	5	6	6	7	0.00346019	0.0174153	0.0275802	0.0788116
15	39110000	39115000	15	39145000	39150000	.	.	.	.	0,0,0	46	19.4886	22.5209	24.0717	22.3808	12	13	13	13	3.06175e-06	0.000354981	0.000913554	0.000931423
15	39230000	39235000	15	39280000	39285000	.	.	.	.	0,0,0	18	5.9132	5.96643	6.95809	6.692	7	7	8	8	0.00326602	0.00597717	0.0405628	0.0395652
15	39315000	39320000	15	39430000	39435000	.	.	.	.	0,0,0	17	3.64827	4.28904	6.03466	5.83942	5	6	7	7	0.000427159	0.00372722	0.0209371	0.0222102
15	39390000	39395000	15	39450000	39455000	.	.	.	.	0,0,0	10	1.94644	1.71326	1.87979	1.45874	2	2	2	1	0.0365757	0.0732432	0.068945	0.029624
15	40095000	40100000	15	40320000	40325000	.	.	.	.	0,0,0	16	3.33381	3.2089	4.11951	4.31211	5	5	6	6	0.00124328	0.00256764	0.0124265	0.0132102
15	40260000	40265000	15	40315000	40320000	.	.	.	.	0,0,0	15	5.16507	5.14489	6.02299	5.53327	7	7	7	7	0.0291065	0.0443084	0.0779212	0.0788116
15	42930000	42935000	15	43120000	43125000	.	.	.	.	0,0,0	24	7.17024	6.38542	11.4189	6.74902	8	8	10	8	0.000133047	0.000255271	0.0294512	0.000447412
15	44190000	44195000	15	44235000	44240000	.	.	.	.	0,0,0	27	6.52891	9.00674	9.80028	14.2982	8	9	9	11	6.8662e-06	0.000208112	0.00049474	0.0456097
15	44200000	44205000	15	44245000	44250000	.	.	.	.	0,0,0	20	3.54932	4.61035	9.42045	5.74215	5	6	9	7	9.25108e-06	0.000185581	0.0479493	0.00181023
15	48240000	48245000	15	48310000	48315000	.	.	.	.	0,0,0	19	5.7585	5.29889	7.05371	6.37313	7	7	8	8	0.00143139	0.0027782	0.0225188	0.0214388
15	50190000	50195000	15	50235000	50240000	.	.	.	.	0,0,0	37	13.5071	18.6541	20.7749	19.1154	11	12	13	12	3.21996e-05	0.0013852	0.05285	0.00363813
15	50195000	50200000	15	50450000	50455000	.	.	.	.	0,0,0	18	7.20534	7.26227	6.83927	7.0226	8	8	8	8	0.0149558	0.020608	0.0405628	0.0395652
15	50275000	50280000	15	50310000	50315000	.	.	.	.	0,0,0	26	4.43306	12.4534	6.47919	7.79166	6	11	8	8	6.52362e-08	0.0339882	8.40075e-05	6.84484e-05
15	50275000	50280000	15	50315000	50320000	.	.	.	.	0,0,0	36	10.1432	13.5802	17.1727	17.5566	10	11	12	12	1.27911e-06	0.000102075	0.00572233	0.00648461
15	50280000	50285000	15	50315000	50320000	.	.	.	.	0,0,0	32	6.97083	9.92189	9.57405	7.73081	8	10	9	8	2.62757e-08	7.03013e-05	5.50303e-06	7.94312e-08
15	50290000	50295000	15	50380000	50385000	.	.	.	.	0,0,0	15	3.84638	4.80303	4.57767	4.66286	5	6	6	6	0.00346019	0.0174153	0.0275802	0.0288497
15	52465000	52470000	15	52585000	52590000	.	.	.	.	0,0,0	18	4.61119	4.32379	5.91944	3.81581	6	6	7	5	0.000711911	0.00136262	0.00955531	0.000390363
15	52465000	52470000	15	52670000	52675000	.	.	.	.	0,0,0	16	3.67584	4.23643	4.25457	3.51462	5	6	6	5	0.00124328	0.00815994	0.0124265	0.0035613
15	52465000	52470000	15	52680000	52685000	.	.	.	.	0,0,0	21	5.06749	6.20664	7.01571	8.66959	7	7	8	9	0.000236683	0.000498246	0.00581603	0.029154
15	52535000	52540000	15	52585000	52590000	.	.	.	.	0,0,0	16	3.98854	5.23253	4.55794	5.34456	6	7	6	7	0.00461177	0.0236047	0.0124265	0.0437082
15	52570000	52575000	15	52605000	52610000	.	.	.	.	0,0,0	19	6.84586	9.71031	8.18881	9.27788	8	9	9	9	0.00762887	0.0407966	0.0811282	0.0835667
15	52585000	52590000	15	52680000	52685000	.	.	.	.	0,0,0	27	9.47474	9.81889	10.9528	10.6896	9	9	10	10	0.000132942	0.000208112	0.00512333	0.00579741
15	52600000	52605000	15	52665000	52670000	.	.	.	.	0,0,0	19	7.21593	8.35259	8.81991	8.44784	8	9	9	9	0.00762887	0.0407966	0.0811282	0.0835667
15	52605000	52610000	15	52670000	52675000	.	.	.	.	0,0,0	23	6.7123	8.12016	10.8233	11.4558	8	9	10	10	0.000326575	0.00412107	0.0495526	0.051787
15	52605000	52610000	15	52680000	52685000	.	.	.	.	0,0,0	26	10.7262	13.2396	15.3674	14.0358	10	11	11	11	0.00350961	0.0339882	0.0708907	0.0691806
15	52610000	52615000	15	52680000	52685000	.	.	.	.	0,0,0	22	5.8683	7.42425	7.43565	7.77345	7	8	8	8	9.34461e-05	0.00131262	0.00271474	0.00247951
15	52665000	52670000	15	52745000	52750000	.	.	.	.	0,0,0	26	6.1378	9.10193	8.53414	13.7683	7	9	9	11	1.07353e-06	0.00045167	0.00104429	0.0691806
15	53295000	53300000	15	53460000	53465000	.	.	.	.	0,0,0	12	2.45978	2.4827	2.85143	2.20468	3	3	4	3	0.00902681	0.0201631	0.0483231	0.0224049
15	53350000	53355000	15	53450000	53455000	.	.	.	.	0,0,0	20	6.05261	6.35177	9.12897	5.9536	7	8	9	7	0.000595801	0.00552989	0.0479493	0.00181023
15	53420000	53425000	15	53460000	53465000	.	.	.	.	0,0,0	32	9.86028	8.71249	6.16221	10.8611	10	9	7	10	4.35595e-05	2.20662e-06	1.15957e-09	0.000178515
15	54900000	54905000	15	54940000	54945000	.	.	.	.	0,0,0	18	4.42762	4.86447	7.68326	7.12667	6	6	8	8	0.000711911	0.00136262	0.0405628	0.0395652
15	57955000	57960000	15	58040000	58045000	.	.	.	.	0,0,0	17	5.98713	5.12132	6.29516	3.45119	7	7	8	5	0.00735115	0.0124709	0.0725713	0.00138412
15	59875000	59880000	15	59940000	59945000	.	.	.	.	0,0,0	27	4.47382	5.34179	6.27974	6.83167	6	7	8	8	1.44033e-08	6.88992e-07	2.88206e-05	2.53e-05
15	59940000	59945000	15	60110000	60115000	.	.	.	.	0,0,0	22	5.89605	6.87032	9.30437	8.47091	7	8	9	9	9.34461e-05	0.00131262	0.0153007	0.0160889
15	59990000	59995000	15	60140000	60145000	.	.	.	.	0,0,0	15	3.33875	4.01292	4.8755	4.7526	5	6	6	6	0.00346019	0.0174153	0.0275802	0.0288497
15	60060000	60065000	15	60110000	60115000	.	.	.	.	0,0,0	24	8.89693	9.40951	9.57955	11.2622	9	9	9	10	0.00139856	0.00206957	0.00452125	0.0318924
15	60070000	60075000	15	60110000	60115000	.	.	.	.	0,0,0	52	9.467	15.2956	11.8725	26.5438	9	11	10	14	5.31224e-18	4.01072e-11	4.86463e-14	0.00249121
15	60070000	60075000	15	60140000	60145000	.	.	.	.	0,0,0	19	6.78461	7.87668	9.52886	8.28339	8	9	9	9	0.00762887	0.0407966	0.0811282	0.0835667
15	60110000	60115000	15	60145000	60150000	.	.	.	.	0,0,0	28	10.4691	10.7079	12.5602	10.1912	10	10	11	10	0.000917176	0.00124135	0.0287076	0.00303266
15	62185000	62190000	15	62325000	62330000	.	.	.	.	0,0,0	14	2.49368	2.7257	2.81179	3.29308	3	4	4	5	0.000848655	0.00587831	0.00793464	0.0239566
15	64170000	64175000	15	64220000	64225000	.	.	.	.	0,0,0	13	1.93697	2.10168	2.23399	3.85164	2	3	3	5	0.000990835	0.00654614	0.00773561	0.0522406
15	67070000	67075000	15	67830000	67835000	.	.	.	.	0,0,0	25	4.22814	3.17122	4.48893	2.52638	6	5	6	4	2.19242e-07	2.10011e-08	4.53679e-07	3.14608e-10
15	67860000	67865000	15	68510000	68515000	.	.	.	.	0,0,0	21	5.56531	5.50202	5.31246	6.79367	7	7	7	8	0.000236683	0.000498246	0.000729734	0.00508086
15	68165000	68170000	15	68475000	68480000	.	.	.	.	0,0,0	27	8.85645	9.00057	10.1288	9.69096	9	9	10	9	0.000132942	0.000208112	0.00512333	0.000441327
15	68185000	68190000	15	68445000	68450000	.	.	.	.	0,0,0	14	2.31397	3.64928	4.93315	4.92954	3	5	6	6	0.000848655	0.0163433	0.0591247	0.0587062
15	68310000	68315000	15	68365000	68370000	.	.	.	.	0,0,0	19	3.36886	5.16977	6.12002	9.7211	5	7	7	9	3.76889e-05	0.0027782	0.00440181	0.0835667
15	68335000	68340000	15	68445000	68450000	.	.	.	.	0,0,0	28	11.1561	12.839	13.7979	15.2054	10	11	11	11	0.000917176	0.013347	0.0287076	0.0287996
15	68335000	68340000	15	68510000	68515000	.	.	.	.	0,0,0	19	9.75404	7.48731	6.59732	8.2145	9	8	8	9	0.033828	0.0110845	0.0225188	0.0835667
15	68355000	68360000	15	68475000	68480000	.	.	.	.	0,0,0	32	14.1147	14.3605	12.0323	19.3585	11	11	10	12	0.00114759	0.00145406	0.000143669	0.0414278
15	68365000	68370000	15	68475000	68480000	.	.	.	.	0,0,0	46	17.8408	18.7996	24.5368	22.4083	12	12	13	13	3.06175e-06	3.5356e-06	0.000913554	0.000931423
15	68380000	68385000	15	68510000	68515000	.	.	.	.	0,0,0	13	3.38973	3.01437	3.74871	3.12502	5	4	5	4	0.0201229	0.0159952	0.0486373	0.0198157
15	68435000	68440000	15	68475000	68480000	.	.	.	.	0,0,0	28	13.8829	13.863	15.199	13.9655	11	11	11	11	0.0118725	0.013347	0.0287076	0.0287996
15	75020000	75025000	15	75070000	75075000	.	.	.	.	0,0,0	20	5.47157	6.89673	9.41038	4.27751	7	8	9	6	0.000595801	0.00552989	0.0479493	0.000258067
15	76030000	76035000	15	76100000	76105000	.	.	.	.	0,0,0	15	5.65986	4.86098	5.7879	5.09384	7	6	7	7	0.0291065	0.0174153	0.0779212	0.0788116
15	76030000	76035000	15	76110000	76115000	.	.	.	.	0,0,0	11	2.42178	2.0243	2.39274	2.41872	3	3	3	3	0.0246042	0.0472408	0.0538051	0.0568751
15	76035000	76040000	15	76070000	76075000	.	.	.	.	0,0,0	22	5.84618	6.33349	8.06174	6.26919	7	8	9	8	9.34461e-05	0.00131262	0.0153007	0.00247951
15	76035000	76040000	15	76095000	76100000	.	.	.	.	0,0,0	32	10.8715	10.075	16.2023	7.03653	10	10	12	8	4.35595e-05	7.03013e-05	0.0386574	7.94312e-08
15	76035000	76040000	15	76100000	76105000	.	.	.	.	0,0,0	38	10.4751	10.4571	14.4242	14.5777	10	10	11	11	1.83632e-07	3.56594e-07	5.21903e-05	5.35069e-05
16	2405000	2410000	16	2480000	2485000	.	.	.	.	0,0,0	44	9.50127	10.5111	9.03668	21.6071	9	10	9	13	6.61657e-13	7.32991e-10	6.00763e-12	0.00284018
16	2440000	2445000	16	2485000	2490000	.	.	.	.	0,0,0	16	2.37497	2.6936	3.24874	4.30136	3	4	5	6	4.9252e-05	0.000542519	0.00314124	0.0132102
16	365000	370000	16	470000	475000	.	.	.	.	0,0,0	15	3.5514	4.54945	5.72708	4.46282	5	6	7	6	0.00346019	0.0174153	0.0779212	0.0288497
16	435000	440000	16	470000	475000	.	.	.	.	0,0,0	13	2.09572	3.82359	3.12575	2.65206	3	5	4	4	0.00279279	0.0350944	0.0195784	0.0198157
16	2790000	2795000	16	2840000	2845000	.	.	.	.	0,0,0	17	7.16085	6.50356	6.27237	3.74464	8	8	8	5	0.0279685	0.0372598	0.0725713	0.00138412
16	2915000	2920000	16	3010000	3015000	.	.	.	.	0,0,0	10	1.29614	1.40412	1.26988	1.63238	1	1	1	2	0.0196098	0.0333707	0.0346461	0.0743431
16	3325000	3330000	16	3365000	3370000	.	.	.	.	0,0,0	16	3.76643	4.64636	5.69259	5.25634	5	6	7	7	0.00124328	0.00815994	0.0419077	0.0437082
16	3350000	3355000	16	3430000	3435000	.	.	.	.	0,0,0	38	13.2557	16.0509	19.6508	14.4068	11	12	13	11	1.46076e-05	0.00077613	0.0371362	5.35069e-05
16	3350000	3355000	16	3435000	3440000	.	.	.	.	0,0,0	22	7.31321	8.45187	9.1104	9.72075	8	9	9	9	0.000735879	0.00767982	0.0153007	0.0160889
16	3350000	3355000	16	3505000	3510000	.	.	.	.	0,0,0	30	8.28192	11.2625	10.9159	13.2361	9	10	10	11	8.73644e-06	0.000301853	0.000638216	0.0103054
16	3360000	3365000	16	3525000	3530000	.	.	.	.	0,0,0	14	3.12949	3.86793	4.86347	4.23906	4	5	6	6	0.00312035	0.0163433	0.0591247	0.0587062
16	3430000	3435000	16	3505000	3510000	.	.	.	.	0,0,0	18	6.73224	7.87769	7.51262	6.86517	8	9	8	8	0.0149558	0.0662561	0.0405628	0.0395652
16	3430000	3435000	16	3525000	3530000	.	.	.	.	0,0,0	20	4.89338	6.56165	7.55394	8.243	6	8	8	9	8.77235e-05	0.00552989	0.0117797	0.0503354
16	3525000	3530000	16	3690000	3695000	.	.	.	.	0,0,0	11	1.83725	2.10942	2.30155	1.82163	2	3	3	2	0.0128071	0.0472408	0.0538051	0.0255303
16	3680000	3685000	16	3715000	3720000	.	.	.	.	0,0,0	14	2.93307	3.32917	3.50845	2.6929	4	5	5	4	0.00312035	0.0163433	0.0211163	0.00726851
16	3710000	3715000	16	3755000	3760000	.	.	.	.	0,0,0	13	3.20606	4.37107	3.904	2.91242	5	6	5	4	0.0201229	0.0652956	0.0486373	0.0198157
16	3825000	3830000	16	3865000	3870000	.	.	.	.	0,0,0	25	13.6952	12.3531	11.6182	12.0135	11	10	10	10	0.0499474	0.00803229	0.0174733	0.0189756
16	3825000	3830000	16	3895000	3900000	.	.	.	.	0,0,0	25	7.62567	9.13243	9.99152	7.41074	8	9	10	8	5.23604e-05	0.000982892	0.0174733	0.000177305
16	3825000	3830000	16	4230000	4235000	.	.	.	.	0,0,0	14	3.2422	3.56104	3.24698	3.60794	5	5	5	5	0.00871876	0.0163433	0.0211163	0.0239566
16	3835000	3840000	16	3895000	3900000	.	.	.	.	0,0,0	17	5.68462	6.58816	5.77492	6.37971	7	8	7	8	0.00735115	0.0372598	0.0209371	0.0701872
16	3865000	3870000	16	3900000	3905000	.	.	.	.	0,0,0	25	4.0376	10.1372	8.34236	4.44457	6	10	9	6	2.19242e-07	0.00803229	0.00214828	6.92706e-07
16	3865000	3870000	16	3910000	3915000	.	.	.	.	0,0,0	24	6.05085	8.52162	9.96356	9.17694	7	9	10	9	1.10059e-05	0.00206957	0.0294512	0.00427756
16	3885000	3890000	16	4135000	4140000	.	.	.	.	0,0,0	14	1.8855	2.17425	2.89679	3.45585	2	3	4	5	0.000210062	0.00211409	0.00793464	0.0239566
16	3895000	3900000	16	3940000	3945000	.	.	.	.	0,0,0	14	5.51037	4.62069	4.49233	4.03642	7	6	6	6	0.0541706	0.0356873	0.0591247	0.0587062
16	4610000	4615000	16	4755000	4760000	.	.	.	.	0,0,0	11	2.34007	2.50141	2.29271	2.0346	3	4	3	3	0.0246042	0.0773483	0.0538051	0.0568751
16	10735000	10740000	16	10775000	10780000	.	.	.	.	0,0,0	32	9.05511	11.6148	15.043	17.3841	9	10	11	12	1.24884e-06	7.03013e-05	0.00327101	0.0414278
16	10735000	10740000	16	10790000	10795000	.	.	.	.	0,0,0	20	10.1574	8.05329	9.00602	3.7553	10	9	9	5	0.0900515	0.0239339	0.0479493	3.10196e-05
16	10735000	10740000	16	11285000	11290000	.	.	.	.	0,0,0	27	6.17274	6.90574	8.34687	6.30027	7	8	9	8	3.24471e-07	1.53397e-05	0.00049474	2.53e-05
16	10825000	10830000	16	10915000	10920000	.	.	.	.	0,0,0	22	6.33167	6.63781	9.45466	6.93076	8	8	9	8	0.000735879	0.00131262	0.0153007	0.00247951
16	10885000	10890000	16	11020000	11025000	.	.	.	.	0,0,0	22	9.0876	6.61644	6.87649	10.4966	9	8	8	10	0.0054492	0.00131262	0.00271474	0.0805399
16	10915000	10920000	16	11020000	11025000	.	.	.	.	0,0,0	34	10.3497	8.58918	9.88941	11.7695	10	9	10	10	7.72474e-06	2.79826e-07	2.77784e-05	3.38331e-05
16	10940000	10945000	16	11285000	11290000	.	.	.	.	0,0,0	15	2.49581	3.65401	3.05364	4.50671	3	5	4	6	0.00020407	0.00690573	0.00238489	0.0288497
16	11205000	11210000	16	11240000	11245000	.	.	.	.	0,0,0	18	1.87483	6.75055	5.85421	3.97527	2	8	7	6	2.73e-07	0.020608	0.00955531	0.00212992
16	11205000	11210000	16	11285000	11290000	.	.	.	.	0,0,0	18	5.14122	6.71921	7.09479	7.77199	7	8	8	8	0.00326602	0.020608	0.0405628	0.0395652
16	11240000	11245000	16	11285000	11290000	.	.	.	.	0,0,0	32	9.70165	11.7998	16.1065	16.9523	9	10	12	12	1.24884e-06	7.03013e-05	0.0386574	0.0414278
16	11240000	11245000	16	11355000	11360000	.	.	.	.	0,0,0	15	2.42147	3.21778	6.17573	3.03784	3	5	7	4	0.00020407	0.00690573	0.0779212	0.00248769
16	11240000	11245000	16	11385000	11390000	.	.	.	.	0,0,0	16	1.94288	2.55426	3.71671	3.68204	2	4	5	5	6.88078e-06	0.000542519	0.00314124	0.0035613
16	11325000	11330000	16	11360000	11365000	.	.	.	.	0,0,0	13	2.98541	4.5708	2.93931	3.61511	4	6	4	5	0.00846838	0.0652956	0.0195784	0.0522406
16	22870000	22875000	16	23110000	23115000	.	.	.	.	0,0,0	44	10.2948	9.83076	14.5163	12.4035	10	9	11	11	3.18694e-10	1.67959e-12	3.3323e-07	3.50937e-07
16	22870000	22875000	16	23205000	23210000	.	.	.	.	0,0,0	21	7.3451	8.18913	8.10535	6.68419	8	9	9	8	0.00167172	0.0139646	0.0277717	0.00508086
16	22870000	22875000	16	23215000	23220000	.	.	.	.	0,0,0	19	7.36802	6.71499	6.88907	6.99259	8	8	8	8	0.00762887	0.0110845	0.0225188	0.0214388
16	22870000	22875000	16	23230000	23235000	.	.	.	.	0,0,0	16	5.71883	4.60807	5.70463	3.95046	7	6	7	6	0.0151448	0.00815994	0.0419077	0.0132102
16	23105000	23110000	16	23185000	23190000	.	.	.	.	0,0,0	19	4.62622	6.07946	8.04718	7.48666	6	7	9	8	0.000269132	0.0027782	0.0811282	0.0214388
16	23110000	23115000	16	23185000	23190000	.	.	.	.	0,0,0	23	5.23692	7.68384	9.39839	10.6781	7	8	9	10	3.42638e-05	0.000599721	0.00841452	0.051787
16	23110000	23115000	16	23205000	23210000	.	.	.	.	0,0,0	20	5.9115	6.22324	7.72749	7.07219	7	7	8	8	0.000595801	0.00125312	0.0117797	0.010513
16	22870000	22875000	16	23755000	23760000	.	.	.	.	0,0,0	14	1.98747	2.80005	2.38264	3.08484	3	4	3	4	0.000848655	0.00587831	0.00238482	0.00726851
16	26755000	26760000	16	26880000	26885000	.	.	.	.	0,0,0	10	1.57212	1.44456	1.57936	1.44871	1	1	1	1	0.0196098	0.0333707	0.0346461	0.029624
16	26825000	26830000	16	27065000	27070000	.	.	.	.	0,0,0	15	2.30333	2.76304	4.14326	1.78245	3	4	6	2	0.00020407	0.00185495	0.0275802	0.000110848
16	26830000	26835000	16	27050000	27055000	.	.	.	.	0,0,0	15	3.42708	4.01798	5.26369	4.06534	5	6	7	6	0.00346019	0.0174153	0.0779212	0.0288497
16	27025000	27030000	16	27060000	27065000	.	.	.	.	0,0,0	37	8.54407	11.4393	10.8328	12.7127	9	10	10	11	5.13375e-09	9.52396e-07	1.89428e-06	0.000110166
16	27025000	27030000	16	27065000	27070000	.	.	.	.	0,0,0	83	17.5481	22.564	42.2439	35.2074	12	13	16	15	9.17231e-24	3.35605e-18	0.000121192	2.09144e-08
16	27025000	27030000	16	27365000	27370000	.	.	.	.	0,0,0	34	5.74197	8.47195	7.99328	14.1346	7	9	9	11	2.41097e-11	2.79826e-07	8.35911e-07	0.000899618
16	27030000	27035000	16	27065000	27070000	.	.	.	.	0,0,0	56	8.2167	14.4692	11.3889	12.3379	9	11	10	10	1.13667e-20	5.35813e-13	2.49741e-16	3.24313e-16
16	27050000	27055000	16	27365000	27370000	.	.	.	.	0,0,0	22	5.64219	7.03397	4.91899	11.0055	7	8	6	10	9.34461e-05	0.00131262	2.64616e-05	0.0805399
16	27365000	27370000	16	27405000	27410000	.	.	.	.	0,0,0	17	7.17065	6.93177	6.35011	4.74107	8	8	8	6	0.0279685	0.0372598	0.0725713	0.00571705
16	27475000	27480000	16	27515000	27520000	.	.	.	.	0,0,0	17	5.3208	5.80997	3.50018	7.43066	7	7	5	8	0.00735115	0.0124709	0.00113376	0.0701872
16	27515000	27520000	16	27660000	27665000	.	.	.	.	0,0,0	13	2.24016	2.37671	2.10237	2.19739	3	3	3	3	0.00279279	0.00654614	0.00773561	0.00750925
16	27695000	27700000	16	27765000	27770000	.	.	.	.	0,0,0	20	3.74732	4.06858	4.64388	5.02942	5	6	6	7	9.25108e-06	0.000185581	0.000276454	0.00181023
16	27705000	27710000	16	27765000	27770000	.	.	.	.	0,0,0	26	5.78383	6.00712	10.1063	6.68585	7	7	10	8	1.07353e-06	2.43209e-06	0.0097313	6.84484e-05
16	28265000	28270000	16	28300000	28305000	.	.	.	.	0,0,0	51	14.0863	20.1638	19.0098	18.4241	11	13	12	12	6.49188e-11	1.58048e-05	1.98116e-07	1.85998e-07
16	28300000	28305000	16	28380000	28385000	.	.	.	.	0,0,0	25	8.5156	9.84636	9.42367	11.0002	9	9	9	10	0.000657915	0.000982892	0.00214828	0.0189756
16	28265000	28270000	16	28935000	28940000	.	.	.	.	0,0,0	12	1.31324	2.38208	3.23218	2.44294	1	3	5	3	0.00130973	0.0201631	0.0986332	0.0224049
16	28820000	28825000	16	28950000	28955000	.	.	.	.	0,0,0	12	2.53402	2.94506	3.51641	1.51927	4	4	5	1	0.0209391	0.0353788	0.0986332	0.0018916
16	28935000	28940000	16	28975000	28980000	.	.	.	.	0,0,0	30	7.83746	9.38023	15.1426	13.6229	9	9	11	11	8.73644e-06	1.58798e-05	0.0103142	0.0103054
16	28950000	28955000	16	29050000	29055000	.	.	.	.	0,0,0	16	5.81586	5.25873	5.94059	5.51442	7	7	7	7	0.0151448	0.0236047	0.0419077	0.0437082
16	30850000	30855000	16	30895000	30900000	.	.	.	.	0,0,0	20	8.27203	8.90278	9.56482	9.1809	9	9	9	9	0.0189875	0.0239339	0.0479493	0.0503354
16	30850000	30855000	16	30940000	30945000	.	.	.	.	0,0,0	29	7.56223	9.43178	13.5693	12.3232	8	9	11	10	8.33648e-07	3.74098e-05	0.0173458	0.00154329
16	30850000	30855000	16	30945000	30950000	.	.	.	.	0,0,0	25	6.84103	7.76202	9.25956	7.89574	8	8	9	9	5.23604e-05	0.000106803	0.00214828	0.00202776
16	30850000	30855000	16	30965000	30970000	.	.	.	.	0,0,0	27	10.108	9.17272	9.69331	9.21334	10	9	9	9	0.00183564	0.000208112	0.00049474	0.000441327
16	30855000	30860000	16	30940000	30945000	.	.	.	.	0,0,0	20	5.50494	7.10667	8.89513	8.85563	7	8	9	9	0.000595801	0.00552989	0.0479493	0.0503354
16	30855000	30860000	16	30945000	30950000	.	.	.	.	0,0,0	15	4.74267	5.57639	5.90256	5.83526	6	7	7	7	0.0107279	0.0443084	0.0779212	0.0788116
16	31680000	31685000	16	31875000	31880000	.	.	.	.	0,0,0	11	2.67651	2.25283	1.6959	2.05911	4	3	2	3	0.0491346	0.0472408	0.0244088	0.0568751
16	31805000	31810000	16	31875000	31880000	.	.	.	.	0,0,0	23	5.98013	6.76272	7.90802	7.42381	7	8	9	8	3.42638e-05	0.000599721	0.00841452	0.00108839
16	35220000	35225000	16	35560000	35565000	.	.	.	.	0,0,0	15	4.79043	4.05546	3.45952	4.33955	6	6	5	6	0.0107279	0.0174153	0.00832192	0.0288497
16	35220000	35225000	16	35285000	35290000	.	.	.	.	0,0,0	19	5.78567	5.72555	4.4873	5.72141	7	7	6	7	0.00143139	0.0027782	0.000831562	0.00453518
16	35555000	35560000	16	35900000	35905000	.	.	.	.	0,0,0	13	2.09044	1.92301	2.69272	1.94515	3	2	4	2	0.00279279	0.00201123	0.0195784	0.00217695
16	35560000	35565000	16	35655000	35660000	.	.	.	.	0,0,0	13	2.97347	2.99213	3.87444	2.69125	4	4	5	4	0.00846838	0.0159952	0.0486373	0.0198157
16	35560000	35565000	16	35660000	35665000	.	.	.	.	0,0,0	22	5.65797	5.50272	6.15464	2.8025	7	7	7	4	9.34461e-05	0.000186378	0.0002794	6.90675e-08
16	35560000	35565000	16	36630000	36635000	.	.	.	.	0,0,0	13	2.28394	2.25334	1.67131	1.97408	3	3	2	2	0.00279279	0.00654614	0.0020789	0.00217695
16	35735000	35740000	16	35900000	35905000	.	.	.	.	0,0,0	27	10.0122	8.26503	7.51198	13.9849	10	9	8	11	0.00183564	0.000208112	2.88206e-05	0.0456097
16	35780000	35785000	16	35900000	35905000	.	.	.	.	0,0,0	19	6.69006	5.41551	6.47082	7.42422	8	7	8	8	0.00762887	0.0027782	0.0225188	0.0214388
16	35800000	35805000	16	35855000	35860000	.	.	.	.	0,0,0	14	2.43038	3.79834	3.99198	4.72616	3	5	6	6	0.000848655	0.0163433	0.0591247	0.0587062
16	40155000	40160000	16	40230000	40235000	.	.	.	.	0,0,0	49	15.9344	17.4279	23.3343	21.7036	12	12	13	13	2.75987e-07	3.47347e-07	0.000154891	0.000169831
16	38745000	38750000	16	39335000	39340000	.	.	.	.	0,0,0	21	2.16989	3.74776	3.54514	5.03445	3	5	5	7	1.01113e-08	6.43377e-06	7.69857e-06	0.000745968
16	39085000	39090000	16	39335000	39340000	.	.	.	.	0,0,0	17	1.81826	3.04864	3.25444	5.17715	2	4	5	7	1.19063e-06	0.000149312	0.00113376	0.0222102
16	39170000	39175000	16	39335000	39340000	.	.	.	.	0,0,0	12	1.90097	2.59727	1.9924	2.87449	2	4	3	4	0.00370862	0.0353788	0.0224015	0.0489862
16	39600000	39605000	16	40155000	40160000	.	.	.	.	0,0,0	14	2.78545	3.16192	4.09165	4.04345	4	5	6	6	0.00312035	0.0163433	0.0591247	0.0587062
16	39605000	39610000	16	39800000	39805000	.	.	.	.	0,0,0	16	3.26895	3.45045	4.57413	4.81747	5	5	6	6	0.00124328	0.00256764	0.0124265	0.0132102
16	39685000	39690000	16	39760000	39765000	.	.	.	.	0,0,0	18	4.94889	6.25609	7.1443	6.83578	6	8	8	8	0.000711911	0.020608	0.0405628	0.0395652
16	39765000	39770000	16	39800000	39805000	.	.	.	.	0,0,0	20	5.85938	6.69849	8.33893	3.65868	7	8	9	5	0.000595801	0.00552989	0.0479493	3.10196e-05
16	39800000	39805000	16	40155000	40160000	.	.	.	.	0,0,0	12	2.74287	2.47169	1.56664	2.85703	4	3	1	4	0.0209391	0.0201631	0.00291149	0.0489862
16	40010000	40015000	16	40060000	40065000	.	.	.	.	0,0,0	27	7.14843	7.82615	10.034	12.2849	8	8	10	10	6.8662e-06	1.53397e-05	0.00512333	0.00579741
16	40020000	40025000	16	40060000	40065000	.	.	.	.	0,0,0	18	4.1876	5.00292	7.45715	7.35876	6	7	8	8	0.000711911	0.00597717	0.0405628	0.0395652
16	40020000	40025000	16	40070000	40075000	.	.	.	.	0,0,0	14	2.76162	2.80838	2.58784	3.7004	4	4	4	5	0.00312035	0.00587831	0.00793464	0.0239566
16	40155000	40160000	16	40190000	40195000	.	.	.	.	0,0,0	18	4.026	6.58302	5.33274	6.11557	6	8	7	7	0.000711911	0.020608	0.00955531	0.010062
16	40155000	40160000	16	40205000	40210000	.	.	.	.	0,0,0	30	9.05751	9.57017	17.4734	11.8488	9	9	12	10	8.73644e-06	1.58798e-05	0.0799876	0.000781155
16	42290000	42295000	16	42325000	42330000	.	.	.	.	0,0,0	26	10.1579	14.2703	14.2687	11.1145	10	11	11	10	0.00350961	0.0339882	0.0708907	0.0106321
16	42290000	42295000	16	42350000	42355000	.	.	.	.	0,0,0	27	10.0614	9.65939	13.1453	13.8408	10	9	11	11	0.00183564	0.000208112	0.0474394	0.0456097
16	42290000	42295000	16	42355000	42360000	.	.	.	.	0,0,0	37	12.084	11.9105	15.7969	18.8979	10	10	12	12	4.93615e-07	9.52396e-07	0.00326503	0.00363813
16	42305000	42310000	16	42355000	42360000	.	.	.	.	0,0,0	23	7.70892	8.22917	9.76125	10.7554	8	9	9	10	0.000326575	0.00412107	0.00841452	0.051787
16	42320000	42325000	16	42355000	42360000	.	.	.	.	0,0,0	17	4.84752	5.42566	6.28302	3.92449	6	7	8	5	0.00197485	0.0124709	0.0725713	0.00138412
16	45670000	45675000	16	45850000	45855000	.	.	.	.	0,0,0	21	5.76192	5.06616	7.75339	3.25245	7	7	8	5	0.000236683	0.000498246	0.00581603	8.489e-06
16	45815000	45820000	16	45850000	45855000	.	.	.	.	0,0,0	33	5.40072	11.2153	4.564	5.7985	7	10	6	7	1.16252e-10	3.12467e-05	1.70436e-12	2.37973e-10
16	47770000	47775000	16	47985000	47990000	.	.	.	.	0,0,0	12	2.29101	2.17556	1.98541	2.40906	3	3	2	3	0.00902681	0.0201631	0.00762797	0.0224049
16	48940000	48945000	16	49060000	49065000	.	.	.	.	0,0,0	12	1.53104	2.67984	2.97427	1.63421	1	4	4	2	0.00130973	0.0353788	0.0483231	0.00774442
16	49000000	49005000	16	49060000	49065000	.	.	.	.	0,0,0	64	18.373	19.1143	20.6676	11.5961	12	12	13	10	1.28699e-13	2.37787e-13	2.70514e-09	2.07888e-21
16	49000000	49005000	16	49075000	49080000	.	.	.	.	0,0,0	16	3.13259	3.01914	3.79008	2.94267	4	4	5	4	0.000268037	0.000542519	0.00314124	0.00071327
16	49020000	49025000	16	49060000	49065000	.	.	.	.	0,0,0	16	7.00063	7.74129	5.4226	4.76016	8	8	7	6	0.0509687	0.0650454	0.0419077	0.0132102
16	49415000	49420000	16	49550000	49555000	.	.	.	.	0,0,0	11	1.60983	1.93787	2.03439	2.32688	2	2	3	3	0.0128071	0.0253787	0.0538051	0.0568751
16	49550000	49555000	16	49600000	49605000	.	.	.	.	0,0,0	17	4.48531	5.0596	4.13769	6.23909	6	7	6	8	0.00197485	0.0124709	0.00586356	0.0701872
16	49060000	49065000	16	49870000	49875000	.	.	.	.	0,0,0	13	1.58553	1.37284	2.87353	2.56776	2	1	4	4	0.000990835	0.000389081	0.0195784	0.0198157
16	49635000	49640000	16	49680000	49685000	.	.	.	.	0,0,0	20	3.91385	4.95348	4.38114	4.02711	5	6	6	6	9.25108e-06	0.000185581	0.000276454	0.000258067
16	49635000	49640000	16	49770000	49775000	.	.	.	.	0,0,0	18	3.44793	3.68203	4.79993	4.37464	5	5	6	6	0.000129896	0.00032402	0.00223808	0.00212992
16	49635000	49640000	16	49870000	49875000	.	.	.	.	0,0,0	13	3.7201	2.68599	3.01708	1.95065	5	4	4	2	0.0201229	0.0159952	0.0195784	0.00217695
16	49680000	49685000	16	49715000	49720000	.	.	.	.	0,0,0	23	8.44356	9.89757	9.69161	7.37261	9	10	9	8	0.00280214	0.0232949	0.00841452	0.00108839
16	49770000	49775000	16	49960000	49965000	.	.	.	.	0,0,0	16	4.20516	4.09991	4.19257	5.38888	6	6	6	7	0.00461177	0.00815994	0.0124265	0.0437082
16	50105000	50110000	16	50230000	50235000	.	.	.	.	0,0,0	18	4.62591	5.70159	6.0585	6.79121	6	7	7	8	0.000711911	0.00597717	0.00955531	0.0395652
16	50220000	50225000	16	50260000	50265000	.	.	.	.	0,0,0	22	5.98224	6.84544	8.02974	11.426	7	8	9	10	9.34461e-05	0.00131262	0.0153007	0.0805399
16	50230000	50235000	16	50265000	50270000	.	.	.	.	0,0,0	22	3.68053	5.84407	5.74687	3.33078	5	7	7	5	5.97413e-07	0.000186378	0.0002794	2.06098e-06
16	54625000	54630000	16	54700000	54705000	.	.	.	.	0,0,0	20	7.10726	8.13741	9.69662	8.05223	8	9	9	9	0.00365306	0.0239339	0.0479493	0.0503354
16	54730000	54735000	16	54770000	54775000	.	.	.	.	0,0,0	45	23.0335	19.329	17.9901	18.3652	13	12	12	12	0.000696341	7.35597e-06	2.28404e-05	2.23466e-05
16	58045000	58050000	16	58295000	58300000	.	.	.	.	0,0,0	14	4.71586	4.97556	4.82022	4.62004	6	7	6	6	0.0228825	0.0783645	0.0591247	0.0587062
16	58100000	58105000	16	58235000	58240000	.	.	.	.	0,0,0	21	7.47868	8.8851	8.16245	6.33174	8	9	9	8	0.00167172	0.0139646	0.0277717	0.00508086
16	58100000	58105000	16	58295000	58300000	.	.	.	.	0,0,0	23	7.9632	8.26006	5.59187	7.88289	9	9	7	9	0.00280214	0.00412107	0.000100436	0.0085689
16	58105000	58110000	16	58235000	58240000	.	.	.	.	0,0,0	15	4.53154	5.30108	5.91634	4.5743	6	7	7	6	0.0107279	0.0443084	0.0779212	0.0288497
16	58215000	58220000	16	58295000	58300000	.	.	.	.	0,0,0	20	8.88051	8.24936	9.22995	9.7076	9	9	9	9	0.0189875	0.0239339	0.0479493	0.0503354
16	58225000	58230000	16	58295000	58300000	.	.	.	.	0,0,0	17	7.37583	6.53444	6.60345	7.72785	8	8	8	8	0.0279685	0.0372598	0.0725713	0.0701872
16	58235000	58240000	16	58295000	58300000	.	.	.	.	0,0,0	64	13.47	16.9208	18.8569	26.7025	11	12	12	14	1.25387e-17	2.37787e-13	6.15917e-13	3.78182e-06
16	58550000	58555000	16	58755000	58760000	.	.	.	.	0,0,0	10	1.60316	1.35373	1.55212	1.45127	2	1	1	1	0.0365757	0.0333707	0.0346461	0.029624
16	58770000	58775000	16	58945000	58950000	.	.	.	.	0,0,0	20	3.35014	3.66599	4.0414	3.89794	5	5	6	5	9.25108e-06	2.53967e-05	0.000276454	3.10196e-05
16	58820000	58825000	16	58950000	58955000	.	.	.	.	0,0,0	11	2.04333	1.93314	2.41733	1.8196	3	2	3	2	0.0246042	0.0253787	0.0538051	0.0255303
16	59025000	59030000	16	59670000	59675000	.	.	.	.	0,0,0	13	2.01726	2.17287	3.57436	1.41017	3	3	5	1	0.00279279	0.00654614	0.0486373	0.000423898
16	59670000	59675000	16	59745000	59750000	.	.	.	.	0,0,0	46	17.6003	15.1367	15.0394	10.0791	12	11	11	10	3.06175e-06	2.07521e-08	5.19485e-08	1.36179e-10
16	59745000	59750000	16	59930000	59935000	.	.	.	.	0,0,0	21	6.13176	6.59155	8.55331	7.8909	7	8	9	9	0.000236683	0.00266206	0.0277717	0.029154
16	60660000	60665000	16	60830000	60835000	.	.	.	.	0,0,0	15	3.29026	3.528	5.65979	2.66783	5	5	7	4	0.00346019	0.00690573	0.0779212	0.00248769
16	60660000	60665000	16	60855000	60860000	.	.	.	.	0,0,0	13	2.56915	2.0937	3.22606	2.87045	4	3	5	4	0.00846838	0.00654614	0.0486373	0.0198157
16	60715000	60720000	16	60810000	60815000	.	.	.	.	0,0,0	29	9.41088	10.7839	13.9742	9.07698	9	10	11	9	2.20184e-05	0.000631809	0.0173458	7.83373e-05
16	60740000	60745000	16	60775000	60780000	.	.	.	.	0,0,0	19	4.96741	9.51041	6.93629	6.26372	7	9	8	8	0.00143139	0.0407966	0.0225188	0.0214388
16	60740000	60745000	16	60785000	60790000	.	.	.	.	0,0,0	20	6.55157	8.75323	6.35396	7.45196	8	9	8	8	0.00365306	0.0239339	0.0117797	0.010513
16	60740000	60745000	16	60790000	60795000	.	.	.	.	0,0,0	32	10.0521	12.5071	11.703	12.0273	10	11	10	10	4.35595e-05	0.00145406	0.000143669	0.000178515
16	60740000	60745000	16	60820000	60825000	.	.	.	.	0,0,0	36	13.2925	17.9926	21.9293	17.4794	11	12	13	12	7.05814e-05	0.00245952	0.0760351	0.00648461
16	60785000	60790000	16	60820000	60825000	.	.	.	.	0,0,0	27	5.84526	10.6295	5.24279	7.7111	7	10	7	8	3.24471e-07	0.00243569	9.87938e-07	2.53e-05
16	60790000	60795000	16	60825000	60830000	.	.	.	.	0,0,0	27	3.92211	7.7844	5.00053	2.50796	5	8	7	4	2.32224e-10	1.53397e-05	9.87938e-07	8.94679e-12
16	62100000	62105000	16	62260000	62265000	.	.	.	.	0,0,0	15	2.17149	2.36835	2.5658	3.44488	3	3	4	5	0.00020407	0.000561407	0.00238489	0.00963794
16	62260000	62265000	16	62520000	62525000	.	.	.	.	0,0,0	12	4.49798	3.27744	3.60662	2.9915	6	5	5	4	0.0852293	0.0690511	0.0986332	0.0489862
16	62475000	62480000	16	62520000	62525000	.	.	.	.	0,0,0	26	8.73085	8.58312	11.6861	11.261	9	9	10	10	0.000299597	0.00045167	0.0097313	0.0106321
16	63130000	63135000	16	63305000	63310000	.	.	.	.	0,0,0	31	11.4682	9.15751	13.373	9.94501	10	9	11	10	9.8328e-05	6.09248e-06	0.00590373	0.000368122
16	63130000	63135000	16	63310000	63315000	.	.	.	.	0,0,0	33	10.5223	8.70293	13.3338	7.1368	10	9	11	8	1.86509e-05	7.80281e-07	0.00172605	2.38525e-08
16	63215000	63220000	16	63315000	63320000	.	.	.	.	0,0,0	13	3.84633	3.31408	3.42024	3.20011	5	5	5	5	0.0201229	0.0350944	0.0486373	0.0522406
16	64405000	64410000	16	64630000	64635000	.	.	.	.	0,0,0	13	2.1953	2.44184	2.08358	3.66534	3	3	3	5	0.00279279	0.00654614	0.00773561	0.0522406
16	64425000	64430000	16	64710000	64715000	.	.	.	.	0,0,0	15	4.19105	3.28581	3.16708	4.45682	6	5	5	6	0.0107279	0.00690573	0.00832192	0.0288497
16	64425000	64430000	16	64780000	64785000	.	.	.	.	0,0,0	24	5.33587	6.21727	5.59813	8.19745	7	7	7	9	1.10059e-05	2.39246e-05	3.42544e-05	0.00427756
16	64695000	64700000	16	64780000	64785000	.	.	.	.	0,0,0	19	5.53298	5.85072	7.23173	6.815	7	7	8	8	0.00143139	0.0027782	0.0225188	0.0214388
16	64770000	64775000	16	64805000	64810000	.	.	.	.	0,0,0	12	1.95752	3.31521	2.40366	1.92005	2	5	3	2	0.00370862	0.0690511	0.0224015	0.00774442
16	64780000	64785000	16	64905000	64910000	.	.	.	.	0,0,0	19	7.06552	6.22101	7.5987	9.09319	8	7	8	9	0.00762887	0.0027782	0.0225188	0.0835667
16	64780000	64785000	16	64910000	64915000	.	.	.	.	0,0,0	22	7.29158	6.85421	8.0879	10.2299	8	8	9	10	0.000735879	0.00131262	0.0153007	0.0805399
16	64870000	64875000	16	64905000	64910000	.	.	.	.	0,0,0	18	3.06794	8.38335	6.60832	5.5963	4	9	8	7	1.92072e-05	0.0662561	0.0405628	0.010062
16	64895000	64900000	16	65075000	65080000	.	.	.	.	0,0,0	15	4.7271	4.68838	4.29657	4.23549	6	6	6	6	0.0107279	0.0174153	0.0275802	0.0288497
16	64905000	64910000	16	64995000	65000000	.	.	.	.	0,0,0	48	12.3563	15.8794	20.2537	17.1245	10	12	13	12	2.64796e-12	7.25118e-07	0.000274883	2.19747e-06
16	64905000	64910000	16	65005000	65010000	.	.	.	.	0,0,0	26	9.17255	11.4052	14.0208	9.81369	9	10	11	9	0.000299597	0.00450532	0.0708907	0.000948172
16	64910000	64915000	16	64945000	64950000	.	.	.	.	0,0,0	21	7.3625	8.66819	7.79864	9.07815	8	9	8	9	0.00167172	0.0139646	0.00581603	0.029154
16	64910000	64915000	16	64995000	65000000	.	.	.	.	0,0,0	40	12.4737	18.2541	22.3664	19.5754	11	12	13	13	2.89359e-06	0.000233978	0.0167527	0.0166018
16	64950000	64955000	16	64995000	65000000	.	.	.	.	0,0,0	60	28.2193	25.6992	22.6635	23.7983	14	14	13	13	1.51578e-05	1.57387e-05	7.83624e-08	8.10553e-08
16	64950000	64955000	16	65005000	65010000	.	.	.	.	0,0,0	25	14.0443	14.5141	11.7044	11.9831	11	11	10	10	0.0499474	0.0517456	0.0174733	0.0189756
16	69225000	69230000	16	69380000	69385000	.	.	.	.	0,0,0	11	2.35493	2.45086	2.18703	1.51651	3	3	3	1	0.0246042	0.0472408	0.0538051	0.00835868
16	69505000	69510000	16	69720000	69725000	.	.	.	.	0,0,0	17	3.63333	5.10069	6.76595	5.58905	5	7	8	7	0.000427159	0.0124709	0.0725713	0.0222102
16	69560000	69565000	16	69720000	69725000	.	.	.	.	0,0,0	37	9.60514	11.5603	11.8235	14.3422	9	10	10	11	5.13375e-09	9.52396e-07	1.89428e-06	0.000110166
16	69560000	69565000	16	69730000	69735000	.	.	.	.	0,0,0	19	4.87343	4.43492	4.88143	6.36578	6	6	6	8	0.000269132	0.000566444	0.000831562	0.0214388
16	69565000	69570000	16	69720000	69725000	.	.	.	.	0,0,0	32	9.86685	11.5989	14.5542	13.3309	10	10	11	11	4.35595e-05	7.03013e-05	0.00327101	0.00336471
16	69720000	69725000	16	70395000	70400000	.	.	.	.	0,0,0	15	3.9187	3.02638	3.94144	3.67617	5	4	5	5	0.00346019	0.00185495	0.00832192	0.00963794
16	69765000	69770000	16	70095000	70100000	.	.	.	.	0,0,0	10	1.86429	1.5139	1.72119	1.42319	2	1	2	1	0.0365757	0.0333707	0.068945	0.029624
16	70290000	70295000	16	70335000	70340000	.	.	.	.	0,0,0	16	2.62727	3.0002	3.27103	3.59223	4	4	5	5	0.000268037	0.000542519	0.00314124	0.0035613
16	70290000	70295000	16	70525000	70530000	.	.	.	.	0,0,0	13	3.37825	3.58538	3.4001	3.54283	5	5	5	5	0.0201229	0.0350944	0.0486373	0.0522406
16	70295000	70300000	16	70425000	70430000	.	.	.	.	0,0,0	18	5.48977	3.94793	5.16245	3.33329	7	6	7	5	0.00326602	0.00136262	0.00955531	0.000390363
16	70300000	70305000	16	70335000	70340000	.	.	.	.	0,0,0	15	3.50956	5.28163	3.72747	5.92752	5	7	5	7	0.00346019	0.0443084	0.00832192	0.0788116
16	70440000	70445000	16	70525000	70530000	.	.	.	.	0,0,0	15	4.48822	4.56484	3.79628	5.63035	6	6	5	7	0.0107279	0.0174153	0.00832192	0.0788116
16	70445000	70450000	16	70525000	70530000	.	.	.	.	0,0,0	18	6.22541	5.95793	5.98571	6.20466	7	7	7	7	0.00326602	0.00597717	0.00955531	0.010062
16	70525000	70530000	16	70565000	70570000	.	.	.	.	0,0,0	23	7.06677	8.13438	11.8244	7.78956	8	9	10	8	0.000326575	0.00412107	0.0495526	0.00108839
16	72170000	72175000	16	72265000	72270000	.	.	.	.	0,0,0	18	5.5054	6.33269	6.23159	7.63444	7	8	7	8	0.00326602	0.020608	0.00955531	0.0395652
16	74025000	74030000	16	74220000	74225000	.	.	.	.	0,0,0	18	7.05801	4.25211	4.73848	4.0909	8	6	6	6	0.0149558	0.00136262	0.00223808	0.00212992
16	74100000	74105000	16	74175000	74180000	.	.	.	.	0,0,0	12	3.09717	3.05423	3.39733	2.73471	4	4	5	4	0.0209391	0.0353788	0.0986332	0.0489862
16	74110000	74115000	16	74310000	74315000	.	.	.	.	0,0,0	15	1.76784	2.7366	3.58749	3.49005	2	4	5	5	4.03619e-05	0.00185495	0.00832192	0.00963794
16	74115000	74120000	16	74220000	74225000	.	.	.	.	0,0,0	16	5.77904	5.66704	4.91539	5.09593	7	7	6	7	0.0151448	0.0236047	0.0124265	0.0437082
16	74120000	74125000	16	74310000	74315000	.	.	.	.	0,0,0	17	2.36877	3.97156	4.27585	4.29013	3	6	6	6	1.05904e-05	0.00372722	0.00586356	0.00571705
16	74125000	74130000	16	74220000	74225000	.	.	.	.	0,0,0	15	4.34996	4.51898	5.03386	5.54942	6	6	7	7	0.0107279	0.0174153	0.0779212	0.0788116
16	74175000	74180000	16	74220000	74225000	.	.	.	.	0,0,0	24	9.39888	10.6344	9.286	11.1682	9	10	9	10	0.00139856	0.0139666	0.00452125	0.0318924
16	74220000	74225000	16	74310000	74315000	.	.	.	.	0,0,0	44	3.7045	8.69011	17.4059	10.452	5	9	12	10	1.23084e-25	1.67959e-12	4.60663e-05	1.62188e-09
16	74235000	74240000	16	74310000	74315000	.	.	.	.	0,0,0	15	1.57101	3.14406	3.58135	5.83294	1	5	5	7	6.78392e-06	0.00690573	0.00832192	0.0788116
16	76020000	76025000	16	76105000	76110000	.	.	.	.	0,0,0	15	4.10734	4.94841	5.80993	4.8113	6	6	7	6	0.0107279	0.0174153	0.0779212	0.0288497
16	76110000	76115000	16	76150000	76155000	.	.	.	.	0,0,0	26	5.51043	8.77445	11.0482	11.1083	7	9	10	10	1.07353e-06	0.00045167	0.0097313	0.0106321
16	77630000	77635000	16	77735000	77740000	.	.	.	.	0,0,0	24	8.27899	7.82175	11.1264	7.98132	9	8	10	9	0.00139856	0.000255271	0.0294512	0.00427756
16	77660000	77665000	16	77695000	77700000	.	.	.	.	0,0,0	18	3.9476	8.10472	7.58334	5.32806	6	9	8	7	0.000711911	0.0662561	0.0405628	0.010062
16	77660000	77665000	16	77710000	77715000	.	.	.	.	0,0,0	25	6.61367	7.86672	10.1423	11.3302	8	9	10	10	5.23604e-05	0.000982892	0.0174733	0.0189756
16	75420000	75425000	16	75635000	75640000	.	.	.	.	0,0,0	11	2.10946	2.04925	2.10109	2.10813	3	3	3	3	0.0246042	0.0472408	0.0538051	0.0568751
16	78370000	78375000	16	78455000	78460000	.	.	.	.	0,0,0	32	9.82793	8.20956	12.4174	6.10683	9	9	11	7	1.24884e-06	2.20662e-06	0.00327101	1.02551e-09
17	1220000	1225000	17	1315000	1320000	.	.	.	.	0,0,0	19	3.26964	4.84836	4.06206	8.47865	5	6	6	9	3.76889e-05	0.000566444	0.000831562	0.0835667
17	1220000	1225000	17	1350000	1355000	.	.	.	.	0,0,0	24	6.29429	5.66008	5.61991	4.75358	8	7	7	6	0.000133047	2.39246e-05	3.42544e-05	2.27628e-06
17	1315000	1320000	17	1350000	1355000	.	.	.	.	0,0,0	21	10.0865	8.9874	9.78485	9.68909	10	9	9	9	0.0574395	0.0139646	0.0277717	0.029154
17	1880000	1885000	17	1975000	1980000	.	.	.	.	0,0,0	17	6.94146	6.7572	6.49972	7.31718	8	8	8	8	0.0279685	0.0372598	0.0725713	0.0701872
17	1975000	1980000	17	2035000	2040000	.	.	.	.	0,0,0	40	17.0812	18.9029	15.6616	21.5875	12	12	12	13	0.000220654	0.000233978	0.000608558	0.0166018
17	2840000	2845000	17	3040000	3045000	.	.	.	.	0,0,0	28	14.061	8.50067	8.71907	8.18847	11	9	9	9	0.0118725	9.23762e-05	0.00021104	0.000187249
17	2875000	2880000	17	3040000	3045000	.	.	.	.	0,0,0	22	5.95847	7.9855	12.2707	7.49673	7	9	10	8	9.34461e-05	0.00767982	0.0787497	0.00247951
17	4800000	4805000	17	4865000	4870000	.	.	.	.	0,0,0	16	4.32033	4.95872	6.16488	6.07686	6	6	7	7	0.00461177	0.00815994	0.0419077	0.0437082
17	4835000	4840000	17	4870000	4875000	.	.	.	.	0,0,0	15	3.43594	5.37745	4.84328	4.45229	5	7	6	6	0.00346019	0.0443084	0.0275802	0.0288497
17	6510000	6515000	17	6565000	6570000	.	.	.	.	0,0,0	15	4.58907	5.27702	4.96076	4.70554	6	7	7	6	0.0107279	0.0443084	0.0779212	0.0288497
17	6510000	6515000	17	6570000	6575000	.	.	.	.	0,0,0	21	5.96813	6.38745	6.00129	6.00947	7	8	7	7	0.000236683	0.00266206	0.000729734	0.000745968
17	6735000	6740000	17	6795000	6800000	.	.	.	.	0,0,0	14	3.41279	3.44869	3.27022	1.72149	5	5	5	2	0.00871876	0.0163433	0.0211163	0.000542969
17	6735000	6740000	17	6800000	6805000	.	.	.	.	0,0,0	21	5.36297	5.78231	5.95557	3.67672	7	7	7	5	0.000236683	0.000498246	0.000729734	8.489e-06
17	6780000	6785000	17	6885000	6890000	.	.	.	.	0,0,0	28	10.8325	10.419	11.1817	15.0093	10	10	10	11	0.000917176	0.00124135	0.00269227	0.0287996
17	6800000	6805000	17	6885000	6890000	.	.	.	.	0,0,0	31	12.4604	13.034	11.9441	18.3567	11	11	10	12	0.00210759	0.00256187	0.000313698	0.0597068
17	7690000	7695000	17	7755000	7760000	.	.	.	.	0,0,0	13	1.88329	2.02597	3.0085	1.42242	2	3	4	1	0.000990835	0.00654614	0.0195784	0.000423898
17	7690000	7695000	17	7760000	7765000	.	.	.	.	0,0,0	13	3.045	2.8901	3.3245	2.28963	4	4	5	3	0.00846838	0.0159952	0.0486373	0.00750925
17	7980000	7985000	17	8025000	8030000	.	.	.	.	0,0,0	28	4.59996	7.15655	9.23386	6.44901	6	8	9	8	3.18613e-09	5.47935e-06	0.00021104	9.32257e-06
17	7990000	7995000	17	8025000	8030000	.	.	.	.	0,0,0	20	3.67183	8.18914	5.77568	5.33702	5	9	7	7	9.25108e-06	0.0239339	0.00186628	0.00181023
17	8165000	8170000	17	8270000	8275000	.	.	.	.	0,0,0	15	3.99473	4.00636	5.10201	5.14641	6	6	7	7	0.0107279	0.0174153	0.0779212	0.0788116
17	8190000	8195000	17	8360000	8365000	.	.	.	.	0,0,0	15	4.08836	4.87307	5.21201	3.51879	6	6	7	5	0.0107279	0.0174153	0.0779212	0.00963794
17	8520000	8525000	17	8560000	8565000	.	.	.	.	0,0,0	37	20.042	16.1576	21.3201	15.0115	13	12	13	11	0.0345401	0.0013852	0.05285	0.000110166
17	8760000	8765000	17	8830000	8835000	.	.	.	.	0,0,0	12	3.13637	2.63882	1.98776	2.80165	4	4	3	4	0.0209391	0.0353788	0.0224015	0.0489862
17	8790000	8795000	17	8825000	8830000	.	.	.	.	0,0,0	24	4.16227	6.95802	5.43982	8.44916	6	8	7	9	7.98413e-07	0.000255271	3.42544e-05	0.00427756
17	9720000	9725000	17	9775000	9780000	.	.	.	.	0,0,0	20	3.70242	3.42469	2.92212	6.41035	5	5	4	8	9.25108e-06	2.53967e-05	2.32956e-06	0.010513
17	9720000	9725000	17	10135000	10140000	.	.	.	.	0,0,0	12	1.67662	1.95396	2.66427	2.3321	2	2	4	3	0.00370862	0.0078592	0.0483231	0.0224049
17	9775000	9780000	17	9830000	9835000	.	.	.	.	0,0,0	11	2.79758	2.86264	2.10267	2.40655	4	4	3	3	0.0491346	0.0773483	0.0538051	0.0568751
17	9830000	9835000	17	9925000	9930000	.	.	.	.	0,0,0	20	7.60473	7.87792	9.04542	7.70846	8	9	9	8	0.00365306	0.0239339	0.0479493	0.010513
17	10105000	10110000	17	10140000	10145000	.	.	.	.	0,0,0	47	14.7242	14.3342	13.9469	19.8828	11	11	11	13	4.32031e-09	7.56538e-09	1.92113e-08	0.000543785
17	10105000	10110000	17	10145000	10150000	.	.	.	.	0,0,0	20	7.24249	6.66932	8.11299	9.34807	8	8	9	9	0.00365306	0.00552989	0.0479493	0.0503354
17	14135000	14140000	17	14335000	14340000	.	.	.	.	0,0,0	14	3.4906	3.16057	3.24756	4.38133	5	5	5	6	0.00871876	0.0163433	0.0211163	0.0587062
17	12755000	12760000	17	12830000	12835000	.	.	.	.	0,0,0	14	3.30091	3.10861	3.25036	3.21607	5	4	5	5	0.00871876	0.00587831	0.0211163	0.0239566
17	15955000	15960000	17	16115000	16120000	.	.	.	.	0,0,0	15	3.07657	2.76954	4.15677	5.27496	4	4	6	7	0.000962873	0.00185495	0.0275802	0.0788116
17	16650000	16655000	17	16760000	16765000	.	.	.	.	0,0,0	15	5.07288	4.37864	4.7289	5.16458	7	6	6	7	0.0291065	0.0174153	0.0275802	0.0788116
17	16700000	16705000	17	16895000	16900000	.	.	.	.	0,0,0	14	2.50723	2.56955	2.53486	3.90194	4	4	4	5	0.00312035	0.00587831	0.00793464	0.0239566
17	16765000	16770000	17	16895000	16900000	.	.	.	.	0,0,0	25	4.88377	4.90082	5.3879	5.70623	6	6	7	7	2.19242e-07	4.47046e-07	1.16326e-05	1.20295e-05
17	16855000	16860000	17	16895000	16900000	.	.	.	.	0,0,0	25	9.38031	9.08142	12.2565	7.28676	9	9	10	8	0.000657915	0.000982892	0.0174733	0.000177305
17	16895000	16900000	17	17025000	17030000	.	.	.	.	0,0,0	15	5.23577	5.37784	5.02447	4.27708	7	7	7	6	0.0291065	0.0443084	0.0779212	0.0288497
17	16990000	16995000	17	17025000	17030000	.	.	.	.	0,0,0	17	5.36066	6.65589	5.15667	5.87073	7	8	7	7	0.00735115	0.0372598	0.0209371	0.0222102
17	17500000	17505000	17	17645000	17650000	.	.	.	.	0,0,0	22	7.55543	5.95963	7.58009	6.10554	8	7	8	7	0.000735879	0.000186378	0.00271474	0.000261144
17	17570000	17575000	17	17635000	17640000	.	.	.	.	0,0,0	15	2.23836	3.24525	5.06503	4.30957	3	5	7	6	0.00020407	0.00690573	0.0779212	0.0288497
17	17580000	17585000	17	17625000	17630000	.	.	.	.	0,0,0	17	5.57023	7.08727	6.83497	6.19153	7	8	8	7	0.00735115	0.0372598	0.0725713	0.0222102
17	17580000	17585000	17	17715000	17720000	.	.	.	.	0,0,0	33	12.8149	14.6087	4.12636	18.929	11	11	6	12	0.000585825	0.000751241	1.70436e-12	0.0263629
17	17595000	17600000	17	17715000	17720000	.	.	.	.	0,0,0	17	4.76955	4.70922	5.39008	6.78516	6	6	7	8	0.00197485	0.00372722	0.0209371	0.0701872
17	17605000	17610000	17	17645000	17650000	.	.	.	.	0,0,0	34	19.0608	14.7787	11.3591	15.363	12	11	10	11	0.00745666	0.000391567	2.77784e-05	0.000899618
17	17645000	17650000	17	17715000	17720000	.	.	.	.	0,0,0	59	13.5211	13.7896	14.4096	16.94	11	11	11	12	7.49389e-15	2.45359e-14	3.42636e-14	1.17452e-10
17	17645000	17650000	17	17725000	17730000	.	.	.	.	0,0,0	38	9.2596	9.34955	13.7567	10.9648	9	9	11	10	1.59876e-09	3.21982e-09	5.21903e-05	8.27651e-07
17	17650000	17655000	17	17715000	17720000	.	.	.	.	0,0,0	23	7.3563	7.33109	10.3173	8.79284	8	8	10	9	0.000326575	0.000599721	0.0495526	0.0085689
17	17655000	17660000	17	17715000	17720000	.	.	.	.	0,0,0	29	5.91113	6.7014	5.68717	9.37387	7	8	7	9	2.75115e-08	1.86671e-06	7.96182e-08	7.83373e-05
17	17665000	17670000	17	17715000	17720000	.	.	.	.	0,0,0	15	2.69058	5.43291	4.17471	5.77317	4	7	6	7	0.000962873	0.0443084	0.0275802	0.0788116
17	17925000	17930000	17	17975000	17980000	.	.	.	.	0,0,0	17	3.45305	3.91088	6.27749	4.84272	5	5	8	6	0.000427159	0.000994097	0.0725713	0.00571705
17	17925000	17930000	17	17985000	17990000	.	.	.	.	0,0,0	20	5.30135	4.46042	3.31866	7.01227	7	6	5	8	0.000595801	0.000185581	2.89253e-05	0.010513
17	17930000	17935000	17	17975000	17980000	.	.	.	.	0,0,0	20	3.41206	4.09104	6.23518	4.05026	5	6	8	6	9.25108e-06	0.000185581	0.0117797	0.000258067
17	17940000	17945000	17	17975000	17980000	.	.	.	.	0,0,0	23	2.40705	6.04073	3.34593	5.78792	3	7	5	7	2.51104e-10	7.1809e-05	4.06521e-07	0.000103363
17	17945000	17950000	17	17985000	17990000	.	.	.	.	0,0,0	22	5.75209	6.20236	7.1517	8.67378	7	7	8	9	9.34461e-05	0.000186378	0.00271474	0.0160889
17	18170000	18175000	17	18205000	18210000	.	.	.	.	0,0,0	16	3.67576	4.72701	3.30391	4.41692	5	6	5	6	0.00124328	0.00815994	0.00314124	0.0132102
17	18170000	18175000	17	18275000	18280000	.	.	.	.	0,0,0	17	5.85014	5.69036	7.5311	5.25952	7	7	8	7	0.00735115	0.0124709	0.0725713	0.0222102
17	18370000	18375000	17	18415000	18420000	.	.	.	.	0,0,0	22	7.54745	7.91108	7.50567	6.88139	8	9	8	8	0.000735879	0.00767982	0.00271474	0.00247951
17	18375000	18380000	17	18415000	18420000	.	.	.	.	0,0,0	17	6.77465	6.58541	7.26076	5.50533	8	8	8	7	0.0279685	0.0372598	0.0725713	0.0222102
17	18500000	18505000	17	18545000	18550000	.	.	.	.	0,0,0	20	4.63085	5.73078	8.45368	3.31172	6	7	9	5	8.77235e-05	0.00125312	0.0479493	3.10196e-05
17	18545000	18550000	17	18645000	18650000	.	.	.	.	0,0,0	15	6.44821	5.26865	5.41153	5.99432	8	7	7	7	0.0866935	0.0443084	0.0779212	0.0788116
17	18550000	18555000	17	18630000	18635000	.	.	.	.	0,0,0	21	4.1966	4.50441	4.75228	7.86631	6	6	6	9	2.79519e-05	5.8423e-05	8.29506e-05	0.029154
17	18975000	18980000	17	19035000	19040000	.	.	.	.	0,0,0	25	7.44098	8.60476	11.2894	7.58781	8	9	10	8	5.23604e-05	0.000982892	0.0174733	0.000177305
17	18985000	18990000	17	19030000	19035000	.	.	.	.	0,0,0	30	14.5366	16.5585	16.0084	15.4146	11	12	12	11	0.00383566	0.0429895	0.0799876	0.0103054
17	18985000	18990000	17	19035000	19040000	.	.	.	.	0,0,0	41	10.0398	14.2732	21.3765	14.6549	10	11	13	11	8.66655e-09	2.03795e-06	0.0110692	5.50179e-06
17	18985000	18990000	17	19060000	19065000	.	.	.	.	0,0,0	19	6.27439	7.03914	8.34317	9.80794	8	8	9	9	0.00762887	0.0110845	0.0811282	0.0835667
17	18985000	18990000	17	19135000	19140000	.	.	.	.	0,0,0	19	6.9718	5.82936	4.87524	5.29397	8	7	6	7	0.00762887	0.0027782	0.000831562	0.00453518
17	19030000	19035000	17	19135000	19140000	.	.	.	.	0,0,0	19	6.96389	7.38137	8.94674	6.42117	8	8	9	8	0.00762887	0.0110845	0.0811282	0.0214388
17	20275000	20280000	17	20310000	20315000	.	.	.	.	0,0,0	33	7.73642	15.2756	7.81939	6.49879	8	11	8	8	8.53328e-09	0.000751241	3.46829e-08	2.38525e-08
17	20275000	20280000	17	20320000	20325000	.	.	.	.	0,0,0	28	7.05368	10.5588	12.4263	11.6216	8	10	11	10	2.43993e-06	0.00124135	0.0287076	0.00303266
17	20275000	20280000	17	20410000	20415000	.	.	.	.	0,0,0	24	5.24005	6.11302	7.57438	8.46901	7	7	8	9	1.10059e-05	2.39246e-05	0.000526658	0.00427756
17	20310000	20315000	17	20410000	20415000	.	.	.	.	0,0,0	35	7.4059	8.85326	11.9117	10.8337	8	9	10	10	7.38706e-10	9.61738e-08	1.20937e-05	1.41805e-05
17	20320000	20325000	17	20410000	20415000	.	.	.	.	0,0,0	30	8.53365	10.0276	13.8168	13.9629	9	10	11	11	8.73644e-06	0.000301853	0.0103142	0.0103054
17	25970000	25975000	17	26030000	26035000	.	.	.	.	0,0,0	23	8.71066	8.49108	7.15919	7.67925	9	9	8	8	0.00280214	0.00412107	0.00126515	0.00108839
17	26730000	26735000	17	26820000	26825000	.	.	.	.	0,0,0	34	8.26555	9.41637	11.9288	10.4115	9	9	10	10	1.4607e-07	2.79826e-07	2.77784e-05	3.38331e-05
17	30740000	30745000	17	30790000	30795000	.	.	.	.	0,0,0	15	6.96739	4.95776	4.95274	5.60033	8	6	6	7	0.0866935	0.0174153	0.0275802	0.0788116
17	30790000	30795000	17	30840000	30845000	.	.	.	.	0,0,0	23	9.12509	9.07191	9.15773	11.3927	9	9	9	10	0.00280214	0.00412107	0.00841452	0.051787
17	30790000	30795000	17	30850000	30855000	.	.	.	.	0,0,0	22	9.39031	9.41114	8.42316	11.0972	9	9	9	10	0.0054492	0.00767982	0.0153007	0.0805399
17	30790000	30795000	17	31240000	31245000	.	.	.	.	0,0,0	21	1.77137	2.95504	3.9169	3.74568	2	4	5	5	8.75647e-10	3.44854e-07	7.69857e-06	8.489e-06
17	30810000	30815000	17	30895000	30900000	.	.	.	.	0,0,0	23	8.62276	8.4104	10.7696	8.82423	9	9	10	9	0.00280214	0.00412107	0.0495526	0.0085689
17	41280000	41285000	17	41755000	41760000	.	.	.	.	0,0,0	16	6.19367	4.74435	5.85505	4.15672	7	6	7	6	0.0151448	0.00815994	0.0419077	0.0132102
17	52415000	52420000	17	52460000	52465000	.	.	.	.	0,0,0	35	11.6166	13.5038	9.85369	13.7296	10	11	10	11	3.24305e-06	0.000207326	1.20937e-05	0.000480434
17	53235000	53240000	17	53345000	53350000	.	.	.	.	0,0,0	20	5.57371	6.66502	6.48701	6.07559	7	8	8	7	0.000595801	0.00552989	0.0117797	0.00181023
17	53235000	53240000	17	53430000	53435000	.	.	.	.	0,0,0	27	9.06639	8.95002	5.50052	10.2593	9	9	7	10	0.000132942	0.000208112	9.87938e-07	0.00579741
17	53235000	53240000	17	53440000	53445000	.	.	.	.	0,0,0	13	4.29592	3.85844	2.60096	3.29597	6	5	4	5	0.0452055	0.0350944	0.0195784	0.0522406
17	53290000	53295000	17	53535000	53540000	.	.	.	.	0,0,0	12	2.56209	2.43199	1.69514	2.5067	4	3	2	4	0.0209391	0.0201631	0.00762797	0.0489862
17	53325000	53330000	17	53425000	53430000	.	.	.	.	0,0,0	22	6.92786	7.0509	6.38697	8.90682	8	8	8	9	0.000735879	0.00131262	0.00271474	0.0160889
17	53325000	53330000	17	53430000	53435000	.	.	.	.	0,0,0	24	9.84798	9.43161	10.558	10.1222	9	9	10	10	0.00139856	0.00206957	0.0294512	0.0318924
17	53335000	53340000	17	53385000	53390000	.	.	.	.	0,0,0	29	7.69275	9.67947	13.8557	9.75122	8	9	11	9	8.33648e-07	3.74098e-05	0.0173458	7.83373e-05
17	53385000	53390000	17	53430000	53435000	.	.	.	.	0,0,0	40	11.4068	14.5753	17.5697	16.0526	10	11	12	12	2.53837e-08	4.70879e-06	0.000608558	0.000650675
17	53395000	53400000	17	53430000	53435000	.	.	.	.	0,0,0	25	4.86075	10.1354	8.14838	4.29876	6	10	9	6	2.19242e-07	0.00803229	0.00214828	6.92706e-07
17	53430000	53435000	17	53535000	53540000	.	.	.	.	0,0,0	23	6.84336	5.10498	5.71141	6.51804	8	7	7	8	0.000326575	7.1809e-05	0.000100436	0.00108839
17	53655000	53660000	17	53790000	53795000	.	.	.	.	0,0,0	32	5.03389	6.35029	8.63641	5.58746	7	8	9	7	4.44543e-10	5.21144e-08	5.50303e-06	1.02551e-09
17	54280000	54285000	17	54335000	54340000	.	.	.	.	0,0,0	25	7.77629	7.86055	4.42237	9.18453	8	9	6	9	5.23604e-05	0.000982892	4.53679e-07	0.00202776
17	54280000	54285000	17	54345000	54350000	.	.	.	.	0,0,0	16	4.49294	4.84866	5.64157	5.79163	6	6	7	7	0.00461177	0.00815994	0.0419077	0.0437082
17	54285000	54290000	17	54335000	54340000	.	.	.	.	0,0,0	20	8.28217	7.81743	8.05658	7.45452	9	8	9	8	0.0189875	0.00552989	0.0479493	0.010513
17	58475000	58480000	17	58560000	58565000	.	.	.	.	0,0,0	18	2.83779	3.64995	4.60501	3.8109	4	5	6	5	1.92072e-05	0.00032402	0.00223808	0.000390363
17	58475000	58480000	17	58585000	58590000	.	.	.	.	0,0,0	22	5.52713	6.70014	10.9554	6.74281	7	8	10	8	9.34461e-05	0.00131262	0.0787497	0.00247951
17	64060000	64065000	17	64135000	64140000	.	.	.	.	0,0,0	19	4.66613	3.91279	4.8006	2.57015	6	5	6	4	0.000269132	0.000100417	0.000831562	1.16697e-05
17	65800000	65805000	17	65835000	65840000	.	.	.	.	0,0,0	14	3.95343	5.49764	4.91731	3.95023	6	7	6	6	0.0228825	0.0783645	0.0591247	0.0587062
17	65860000	65865000	17	65940000	65945000	.	.	.	.	0,0,0	18	4.47765	5.59049	5.62274	6.2805	6	7	7	8	0.000711911	0.00597717	0.00955531	0.0395652
17	66200000	66205000	17	66265000	66270000	.	.	.	.	0,0,0	12	2.38154	2.16546	2.48152	2.70276	3	3	3	4	0.00902681	0.0201631	0.0224015	0.0489862
17	66645000	66650000	17	66700000	66705000	.	.	.	.	0,0,0	23	6.15934	7.64705	8.22331	8.89812	7	8	9	9	3.42638e-05	0.000599721	0.00841452	0.0085689
17	66655000	66660000	17	66735000	66740000	.	.	.	.	0,0,0	19	5.23617	6.66427	7.66087	7.57697	7	8	8	8	0.00143139	0.0110845	0.0225188	0.0214388
17	66665000	66670000	17	66700000	66705000	.	.	.	.	0,0,0	15	4.16797	5.49499	5.92453	3.57079	6	7	7	5	0.0107279	0.0443084	0.0779212	0.00963794
17	66830000	66835000	17	66925000	66930000	.	.	.	.	0,0,0	14	2.11298	2.18754	2.66702	3.1811	3	3	4	5	0.000848655	0.00211409	0.00793464	0.0239566
17	68875000	68880000	17	69185000	69190000	.	.	.	.	0,0,0	22	4.27304	4.90057	7.64932	4.78026	6	6	8	6	8.79751e-06	1.75017e-05	0.00271474	2.69565e-05
17	68875000	68880000	17	69190000	69195000	.	.	.	.	0,0,0	37	5.89043	7.23536	10.9989	9.34358	7	8	10	9	2.01151e-13	1.49845e-10	1.89428e-06	2.39965e-08
17	68995000	69000000	17	69095000	69100000	.	.	.	.	0,0,0	13	3.01407	2.84178	2.96535	3.46444	4	4	4	5	0.00846838	0.0159952	0.0195784	0.0522406
18	210000	215000	18	285000	290000	.	.	.	.	0,0,0	14	2.92496	2.33835	2.11336	2.97401	4	3	3	4	0.00312035	0.00211409	0.00238482	0.00726851
18	245000	250000	18	280000	285000	.	.	.	.	0,0,0	14	3.63877	3.81452	3.24957	4.90368	5	5	5	6	0.00871876	0.0163433	0.0211163	0.0587062
18	3980000	3985000	18	4100000	4105000	.	.	.	.	0,0,0	20	4.94153	8.14911	7.95941	9.40719	6	9	9	9	8.77235e-05	0.0239339	0.0479493	0.0503354
18	4100000	4105000	18	4135000	4140000	.	.	.	.	0,0,0	21	6.91683	6.62315	8.38525	4.33567	8	8	9	6	0.00167172	0.00266206	0.0277717	8.12278e-05
18	7535000	7540000	18	7570000	7575000	.	.	.	.	0,0,0	22	7.60251	8.58217	8.9304	5.11443	8	9	9	7	0.000735879	0.00767982	0.0153007	0.000261144
18	9030000	9035000	18	9090000	9095000	.	.	.	.	0,0,0	35	7.99832	8.94605	11.127	7.77933	9	9	10	8	5.13126e-08	9.61738e-08	1.20937e-05	2.37525e-09
18	9030000	9035000	18	9095000	9100000	.	.	.	.	0,0,0	28	7.8688	9.05462	14.8984	14.1021	9	9	11	11	5.39532e-05	9.23762e-05	0.0287076	0.0287996
18	9030000	9035000	18	9105000	9110000	.	.	.	.	0,0,0	28	11.5648	11.2275	10.374	13.679	10	10	10	11	0.000917176	0.00124135	0.00269227	0.0287996
18	9030000	9035000	18	9110000	9115000	.	.	.	.	0,0,0	21	10.3859	9.02762	8.28354	9.34558	10	9	9	9	0.0574395	0.0139646	0.0277717	0.029154
18	9030000	9035000	18	9150000	9155000	.	.	.	.	0,0,0	18	5.46836	4.54381	7.505	5.25998	7	6	8	7	0.00326602	0.00136262	0.0405628	0.010062
18	9280000	9285000	18	9380000	9385000	.	.	.	.	0,0,0	20	6.17025	5.45187	7.95826	4.95511	7	7	9	6	0.000595801	0.00125312	0.0479493	0.000258067
18	9370000	9375000	18	9410000	9415000	.	.	.	.	0,0,0	31	7.18917	10.2745	11.3744	15.2184	8	10	10	11	8.33059e-08	0.000147501	0.000313698	0.00594302
18	9640000	9645000	18	9675000	9680000	.	.	.	.	0,0,0	22	9.40749	10.0317	9.93581	9.00843	9	10	10	9	0.0054492	0.0377448	0.0787497	0.0160889
18	12110000	12115000	18	12210000	12215000	.	.	.	.	0,0,0	13	3.03233	2.36089	2.74786	2.87106	4	3	4	4	0.00846838	0.00654614	0.0195784	0.0198157
18	12115000	12120000	18	12160000	12165000	.	.	.	.	0,0,0	19	5.57179	5.18055	8.51649	6.67298	7	7	9	8	0.00143139	0.0027782	0.0811282	0.0214388
18	12115000	12120000	18	12210000	12215000	.	.	.	.	0,0,0	32	9.19668	7.4619	10.9829	9.32754	9	8	10	9	1.24884e-06	5.21144e-08	0.000143669	4.61687e-06
18	12115000	12120000	18	12215000	12220000	.	.	.	.	0,0,0	43	11.1124	8.52075	13.3708	9.46484	10	9	11	9	1.01259e-09	5.73949e-12	8.02896e-07	1.44224e-11
18	12115000	12120000	18	12285000	12290000	.	.	.	.	0,0,0	17	6.72248	5.37697	7.60647	7.08567	8	7	8	8	0.0279685	0.0124709	0.0725713	0.0701872
18	12195000	12200000	18	12285000	12290000	.	.	.	.	0,0,0	15	3.41179	3.82783	3.24722	5.23685	5	5	5	7	0.00346019	0.00690573	0.00832192	0.0788116
18	12215000	12220000	18	12280000	12285000	.	.	.	.	0,0,0	14	3.51845	3.6764	4.18786	4.50488	5	5	6	6	0.00871876	0.0163433	0.0591247	0.0587062
18	12215000	12220000	18	12285000	12290000	.	.	.	.	0,0,0	18	4.51396	4.90525	6.88586	6.776	6	6	8	8	0.000711911	0.00136262	0.0405628	0.0395652
18	12215000	12220000	18	12510000	12515000	.	.	.	.	0,0,0	12	2.19837	2.92107	3.48172	2.98427	3	4	5	4	0.00902681	0.0353788	0.0986332	0.0489862
18	12355000	12360000	18	12480000	12485000	.	.	.	.	0,0,0	15	3.5934	3.76549	3.49201	5.0242	5	5	5	7	0.00346019	0.00690573	0.00832192	0.0788116
18	12370000	12375000	18	12470000	12475000	.	.	.	.	0,0,0	21	6.27504	6.13463	8.99031	4.46734	8	7	9	6	0.00167172	0.000498246	0.0277717	8.12278e-05
18	12435000	12440000	18	12470000	12475000	.	.	.	.	0,0,0	19	3.81395	7.95011	4.81283	5.7023	5	9	6	7	3.76889e-05	0.0407966	0.000831562	0.00453518
18	12470000	12475000	18	12530000	12535000	.	.	.	.	0,0,0	37	13.0407	13.522	9.01157	16.3268	11	11	9	12	3.21996e-05	4.69472e-05	3.308e-08	0.00363813
18	12470000	12475000	18	12535000	12540000	.	.	.	.	0,0,0	19	4.61473	5.75217	6.91773	6.05415	6	7	8	7	0.000269132	0.0027782	0.0225188	0.00453518
18	12945000	12950000	18	13160000	13165000	.	.	.	.	0,0,0	17	3.25725	3.54024	6.10666	4.11123	5	5	7	6	0.000427159	0.000994097	0.0209371	0.00571705
18	13120000	13125000	18	13160000	13165000	.	.	.	.	0,0,0	19	5.07445	5.42524	3.29862	9.12498	7	7	5	9	0.00143139	0.0027782	9.6188e-05	0.0835667
18	14315000	14320000	18	14370000	14375000	.	.	.	.	0,0,0	16	2.82649	3.16425	4.12594	3.23117	4	5	6	5	0.000268037	0.00256764	0.0124265	0.0035613
18	15605000	15610000	18	15860000	15865000	.	.	.	.	0,0,0	18	4.00013	5.17204	7.04872	3.71887	6	7	8	5	0.000711911	0.00597717	0.0405628	0.000390363
18	15760000	15765000	18	15860000	15865000	.	.	.	.	0,0,0	21	6.89914	6.86786	7.61034	6.85898	8	8	8	8	0.00167172	0.00266206	0.00581603	0.00508086
18	15860000	15865000	18	15990000	15995000	.	.	.	.	0,0,0	22	5.70903	5.89967	5.81672	7.87026	7	7	7	9	9.34461e-05	0.000186378	0.0002794	0.0160889
18	15860000	15865000	18	16050000	16055000	.	.	.	.	0,0,0	18	3.61828	4.33687	5.25679	6.41003	5	6	7	8	0.000129896	0.00136262	0.00955531	0.0395652
18	18175000	18180000	18	18235000	18240000	.	.	.	.	0,0,0	34	10.5617	9.71498	11.7903	17.4048	10	9	10	12	7.72474e-06	2.79826e-07	2.77784e-05	0.0168279
18	18200000	18205000	18	18235000	18240000	.	.	.	.	0,0,0	19	4.96442	7.54366	4.90819	7.17251	7	8	6	8	0.00143139	0.0110845	0.000831562	0.0214388
18	18570000	18575000	18	18655000	18660000	.	.	.	.	0,0,0	14	3.70908	4.45221	4.69031	4.86665	5	6	6	6	0.00871876	0.0356873	0.0591247	0.0587062
18	21960000	21965000	18	22005000	22010000	.	.	.	.	0,0,0	21	6.34205	5.97287	5.7014	5.83451	8	7	7	7	0.00167172	0.000498246	0.000729734	0.000745968
18	21960000	21965000	18	22010000	22015000	.	.	.	.	0,0,0	15	4.25061	3.73425	4.12202	2.6889	6	5	6	4	0.0107279	0.00690573	0.0275802	0.00248769
18	22930000	22935000	18	23025000	23030000	.	.	.	.	0,0,0	18	4.43235	4.47664	6.44007	5.24823	6	6	8	7	0.000711911	0.00136262	0.0405628	0.010062
18	22990000	22995000	18	23225000	23230000	.	.	.	.	0,0,0	17	3.58358	4.08728	3.84517	6.02143	5	6	5	7	0.000427159	0.00372722	0.00113376	0.0222102
18	26360000	26365000	18	26430000	26435000	.	.	.	.	0,0,0	38	8.58174	9.64641	13.9695	12.3313	9	9	11	10	1.59876e-09	3.21982e-09	5.21903e-05	8.27651e-07
18	26360000	26365000	18	26435000	26440000	.	.	.	.	0,0,0	25	5.64357	6.23923	8.59656	7.67709	7	8	9	8	3.53834e-06	0.000106803	0.00214828	0.000177305
18	26375000	26380000	18	26430000	26435000	.	.	.	.	0,0,0	24	5.17401	7.42752	11.3852	10.5724	7	8	10	10	1.10059e-05	0.000255271	0.0294512	0.0318924
18	26395000	26400000	18	26435000	26440000	.	.	.	.	0,0,0	22	6.95695	9.26056	7.2171	10.5755	8	9	8	10	0.000735879	0.00767982	0.00271474	0.0805399
18	26430000	26435000	18	26610000	26615000	.	.	.	.	0,0,0	17	5.25715	6.06425	5.54801	7.64354	7	7	7	8	0.00735115	0.0124709	0.0209371	0.0701872
18	26610000	26615000	18	26665000	26670000	.	.	.	.	0,0,0	27	7.62643	8.01386	9.94361	14.1344	8	9	10	11	6.8662e-06	0.000208112	0.00512333	0.0456097
18	26665000	26670000	18	26725000	26730000	.	.	.	.	0,0,0	27	12.9637	13.5995	13.4199	13.3176	11	11	11	11	0.0197167	0.0215097	0.0474394	0.0456097
18	26665000	26670000	18	26750000	26755000	.	.	.	.	0,0,0	27	10.7652	11.3414	14.4321	9.9196	10	10	11	10	0.00183564	0.00243569	0.0474394	0.00579741
18	26665000	26670000	18	26765000	26770000	.	.	.	.	0,0,0	20	7.03786	6.74546	8.24724	8.67719	8	8	9	9	0.00365306	0.00552989	0.0479493	0.0503354
18	36350000	36355000	18	36610000	36615000	.	.	.	.	0,0,0	13	3.73033	2.83324	3.49364	2.48271	5	4	5	3	0.0201229	0.0159952	0.0486373	0.00750925
18	36405000	36410000	18	36585000	36590000	.	.	.	.	0,0,0	25	4.20663	6.02775	6.86467	9.22667	6	7	8	9	2.19242e-07	8.05872e-06	0.000218788	0.00202776
18	36585000	36590000	18	36680000	36685000	.	.	.	.	0,0,0	22	6.32681	5.6657	9.86043	7.74828	8	7	10	8	0.000735879	0.000186378	0.0787497	0.00247951
18	36720000	36725000	18	36895000	36900000	.	.	.	.	0,0,0	17	7.39543	6.3922	7.49348	5.01105	8	8	8	7	0.0279685	0.0372598	0.0725713	0.0222102
18	36740000	36745000	18	36780000	36785000	.	.	.	.	0,0,0	32	7.1316	10.4952	12.1633	16.0854	8	10	10	12	2.62757e-08	7.03013e-05	0.000143669	0.0414278
18	36745000	36750000	18	36780000	36785000	.	.	.	.	0,0,0	38	15.3066	19.493	17.5377	19.9827	11	12	12	13	1.46076e-05	0.00077613	0.001847	0.0372047
18	36745000	36750000	18	36810000	36815000	.	.	.	.	0,0,0	19	5.69752	6.25235	8.41371	9.80531	7	8	9	9	0.00143139	0.0110845	0.0811282	0.0835667
18	36780000	36785000	18	36815000	36820000	.	.	.	.	0,0,0	20	5.2483	9.13277	5.27493	4.79102	7	9	7	6	0.000595801	0.0239339	0.00186628	0.000258067
18	36780000	36785000	18	36895000	36900000	.	.	.	.	0,0,0	32	12.9963	14.8937	18.2287	14.4123	11	11	12	11	0.00114759	0.00145406	0.0386574	0.00336471
18	36880000	36885000	18	36940000	36945000	.	.	.	.	0,0,0	17	6.66447	7.44426	4.36354	7.35334	8	8	6	8	0.0279685	0.0372598	0.00586356	0.0701872
18	36885000	36890000	18	36920000	36925000	.	.	.	.	0,0,0	21	3.74459	6.50535	3.26702	4.32264	5	8	5	6	2.62742e-06	0.00266206	7.69857e-06	8.12278e-05
18	36885000	36890000	18	36940000	36945000	.	.	.	.	0,0,0	26	9.02616	9.98287	8.79561	6.37665	9	10	9	8	0.000299597	0.00450532	0.00104429	6.84484e-05
18	36895000	36900000	18	36940000	36945000	.	.	.	.	0,0,0	39	10.7432	12.145	16.4161	13.4077	10	10	12	11	7.0096e-08	1.34465e-07	0.00104077	2.46565e-05
18	37725000	37730000	18	37780000	37785000	.	.	.	.	0,0,0	19	5.98791	7.76674	9.28004	7.88157	7	8	9	9	0.00143139	0.0110845	0.0811282	0.0835667
18	37745000	37750000	18	37780000	37785000	.	.	.	.	0,0,0	43	17.9483	18.3044	15.5681	19.6271	12	12	12	13	2.93159e-05	3.21388e-05	9.20703e-05	0.00465315
18	39300000	39305000	18	39375000	39380000	.	.	.	.	0,0,0	15	3.65905	4.16251	5.34654	5.5112	5	6	7	7	0.00346019	0.0174153	0.0779212	0.0788116
18	40230000	40235000	18	40470000	40475000	.	.	.	.	0,0,0	16	4.2682	3.57085	3.57721	3.73606	6	5	5	5	0.00461177	0.00256764	0.00314124	0.0035613
18	40235000	40240000	18	40420000	40425000	.	.	.	.	0,0,0	17	3.77989	4.07188	6.66112	4.97533	5	6	8	7	0.000427159	0.00372722	0.0725713	0.0222102
18	40420000	40425000	18	40470000	40475000	.	.	.	.	0,0,0	44	15.8559	14.0471	11.096	18.8483	12	11	10	12	1.4144e-05	1.43339e-07	1.27356e-09	4.56896e-05
18	41615000	41620000	18	41710000	41715000	.	.	.	.	0,0,0	14	5.13876	5.46766	4.10988	4.87688	7	7	6	6	0.0541706	0.0783645	0.0591247	0.0587062
18	44015000	44020000	18	44085000	44090000	.	.	.	.	0,0,0	34	8.91461	8.03592	7.81144	8.50052	9	9	8	9	1.4607e-07	2.79826e-07	1.04715e-08	7.0995e-07
18	44020000	44025000	18	44085000	44090000	.	.	.	.	0,0,0	17	5.21158	5.61377	7.62558	5.95606	7	7	8	7	0.00735115	0.0124709	0.0725713	0.0222102
18	44025000	44030000	18	44075000	44080000	.	.	.	.	0,0,0	25	5.7745	6.75123	9.68652	9.08716	7	8	9	9	3.53834e-06	0.000106803	0.00214828	0.00202776
18	44455000	44460000	18	44545000	44550000	.	.	.	.	0,0,0	14	4.398	4.79555	3.82313	3.51477	6	6	5	5	0.0228825	0.0356873	0.0211163	0.0239566
18	44455000	44460000	18	44655000	44660000	.	.	.	.	0,0,0	24	5.23262	6.49619	5.94304	2.58501	7	8	7	4	1.10059e-05	0.000255271	3.42544e-05	1.81165e-09
18	44745000	44750000	18	44780000	44785000	.	.	.	.	0,0,0	18	5.37246	5.8563	6.86104	5.48342	7	7	8	7	0.00326602	0.00597717	0.0405628	0.010062
18	46555000	46560000	18	46805000	46810000	.	.	.	.	0,0,0	11	1.28496	1.58343	1.71126	2.15259	1	2	2	3	0.0056938	0.0253787	0.0244088	0.0568751
18	46570000	46575000	18	46740000	46745000	.	.	.	.	0,0,0	19	6.47719	6.83285	5.22217	8.37729	8	8	7	9	0.00762887	0.0110845	0.00440181	0.0835667
18	46690000	46695000	18	46745000	46750000	.	.	.	.	0,0,0	34	10.1939	12.0625	14.0875	18.631	10	10	11	12	7.72474e-06	1.33892e-05	0.000880541	0.0168279
18	46690000	46695000	18	46755000	46760000	.	.	.	.	0,0,0	33	11.7582	11.7967	12.5425	18.2617	10	10	11	12	1.86509e-05	3.12467e-05	0.00172605	0.0263629
18	46690000	46695000	18	46805000	46810000	.	.	.	.	0,0,0	22	11.0561	9.59762	11.8926	9.7575	10	9	10	9	0.0353406	0.00767982	0.0787497	0.0160889
18	46705000	46710000	18	46740000	46745000	.	.	.	.	0,0,0	24	3.94259	8.84658	3.8787	5.86396	5	9	5	7	3.0566e-08	0.00206957	8.96384e-08	3.59681e-05
18	46705000	46710000	18	46755000	46760000	.	.	.	.	0,0,0	31	9.90062	9.8963	13.5024	16.9892	10	10	11	12	9.8328e-05	0.000147501	0.00590373	0.0597068
18	46710000	46715000	18	46745000	46750000	.	.	.	.	0,0,0	19	4.99656	8.7488	5.53151	5.5484	7	9	7	7	0.00143139	0.0407966	0.00440181	0.00453518
18	46710000	46715000	18	46755000	46760000	.	.	.	.	0,0,0	27	7.73233	8.39272	10.9818	10.6914	8	9	10	10	6.8662e-06	0.000208112	0.00512333	0.00579741
18	46755000	46760000	18	46805000	46810000	.	.	.	.	0,0,0	16	5.56427	7.12431	4.62972	5.40434	7	8	6	7	0.0151448	0.0650454	0.0124265	0.0437082
18	46755000	46760000	18	46810000	46815000	.	.	.	.	0,0,0	12	2.22817	2.76285	3.05267	2.0301	3	4	4	3	0.00902681	0.0353788	0.0483231	0.0224049
18	46805000	46810000	18	46925000	46930000	.	.	.	.	0,0,0	23	8.62966	11.6664	11.3248	10.7548	9	10	10	10	0.00280214	0.0232949	0.0495526	0.051787
18	46880000	46885000	18	46955000	46960000	.	.	.	.	0,0,0	15	3.03763	3.69313	5.0264	4.66743	4	5	7	6	0.000962873	0.00690573	0.0779212	0.0288497
18	46905000	46910000	18	46955000	46960000	.	.	.	.	0,0,0	19	7.14974	7.0232	9.63659	9.37051	8	8	9	9	0.00762887	0.0110845	0.0811282	0.0835667
18	47070000	47075000	18	47275000	47280000	.	.	.	.	0,0,0	13	1.94805	2.11723	3.37885	2.83699	2	3	5	4	0.000990835	0.00654614	0.0486373	0.0198157
18	47210000	47215000	18	47275000	47280000	.	.	.	.	0,0,0	22	7.25823	7.73931	8.63102	9.27966	8	8	9	9	0.000735879	0.00131262	0.0153007	0.0160889
18	46570000	46575000	18	47430000	47435000	.	.	.	.	0,0,0	19	6.31263	6.63807	7.17157	5.94993	8	8	8	7	0.00762887	0.0110845	0.0225188	0.00453518
18	46570000	46575000	18	47465000	47470000	.	.	.	.	0,0,0	17	5.11285	4.66578	3.72871	5.33738	7	6	5	7	0.00735115	0.00372722	0.00113376	0.0222102
18	47095000	47100000	18	47305000	47310000	.	.	.	.	0,0,0	13	2.42899	3.31034	3.15315	3.21673	3	5	5	5	0.00279279	0.0350944	0.0486373	0.0522406
18	47250000	47255000	18	47305000	47310000	.	.	.	.	0,0,0	19	5.27254	7.33519	8.15597	9.48854	7	8	9	9	0.00143139	0.0110845	0.0811282	0.0835667
18	47275000	47280000	18	47315000	47320000	.	.	.	.	0,0,0	65	24.5247	32.8557	18.1228	45.1219	13	15	12	16	3.10532e-10	0.000389495	2.21382e-13	0.0635056
18	47275000	47280000	18	47435000	47440000	.	.	.	.	0,0,0	24	7.69362	10.2215	11.7913	9.88627	8	10	10	10	0.000133047	0.0139666	0.0294512	0.0318924
18	47315000	47320000	18	47370000	47375000	.	.	.	.	0,0,0	29	14.2153	12.1647	12.7822	14.7568	11	10	11	11	0.00688303	0.000631809	0.0173458	0.0178204
18	47315000	47320000	18	47430000	47435000	.	.	.	.	0,0,0	34	16.5988	19.4288	18.3729	10.6318	12	12	12	10	0.00745666	0.00689358	0.0157276	3.38331e-05
18	47315000	47320000	18	47435000	47440000	.	.	.	.	0,0,0	34	9.84094	13.4405	12.4822	8.09247	9	11	11	9	1.4607e-07	0.000391567	0.000880541	7.0995e-07
18	47330000	47335000	18	47370000	47375000	.	.	.	.	0,0,0	18	6.56009	5.91572	4.98613	7.20561	8	7	7	8	0.0149558	0.00597717	0.00955531	0.0395652
18	47330000	47335000	18	47465000	47470000	.	.	.	.	0,0,0	19	2.81495	4.73083	3.81851	8.36725	4	6	5	9	5.56238e-06	0.000566444	9.6188e-05	0.0835667
18	47370000	47375000	18	47465000	47470000	.	.	.	.	0,0,0	18	3.94028	4.4626	5.01647	5.83069	5	6	7	7	0.000129896	0.00136262	0.00955531	0.010062
18	47420000	47425000	18	47465000	47470000	.	.	.	.	0,0,0	19	5.38341	4.60917	6.6558	6.83936	7	6	8	8	0.00143139	0.000566444	0.0225188	0.0214388
18	47430000	47435000	18	47465000	47470000	.	.	.	.	0,0,0	79	16.7315	21.2253	10.7282	15.1139	12	13	10	11	1.53128e-21	2.56522e-16	4.02574e-32	6.59255e-26
18	47430000	47435000	18	47555000	47560000	.	.	.	.	0,0,0	19	5.06249	4.8797	7.07958	3.44132	7	6	8	5	0.00143139	0.000566444	0.0225188	0.000117658
18	47465000	47470000	18	47640000	47645000	.	.	.	.	0,0,0	13	4.72009	3.95995	2.78144	3.89914	6	6	4	5	0.0452055	0.0652956	0.0195784	0.0522406
18	47615000	47620000	18	47650000	47655000	.	.	.	.	0,0,0	15	4.3235	4.88537	3.92052	3.67889	6	6	5	5	0.0107279	0.0174153	0.00832192	0.00963794
18	47660000	47665000	18	47695000	47700000	.	.	.	.	0,0,0	21	9.14022	7.80065	9.81969	7.92359	9	8	9	9	0.0104689	0.00266206	0.0277717	0.029154
18	47695000	47700000	18	47770000	47775000	.	.	.	.	0,0,0	20	7.40246	6.66417	6.5718	6.86661	8	8	8	8	0.00365306	0.00552989	0.0117797	0.010513
18	49025000	49030000	18	49085000	49090000	.	.	.	.	0,0,0	24	8.62441	9.51288	12.1917	5.20434	9	9	10	7	0.00139856	0.00206957	0.0294512	3.59681e-05
18	49025000	49030000	18	49095000	49100000	.	.	.	.	0,0,0	28	8.1224	9.78736	13.5943	5.51123	9	9	11	7	5.39532e-05	9.23762e-05	0.0287076	2.58436e-07
18	49025000	49030000	18	49455000	49460000	.	.	.	.	0,0,0	14	3.23454	4.08291	3.80866	4.65097	5	6	5	6	0.00871876	0.0356873	0.0211163	0.0587062
18	49275000	49280000	18	49525000	49530000	.	.	.	.	0,0,0	21	4.53211	4.99706	7.05892	6.9859	6	7	8	8	2.79519e-05	0.000498246	0.00581603	0.00508086
18	49295000	49300000	18	49460000	49465000	.	.	.	.	0,0,0	14	4.01764	4.24457	4.21225	4.39976	6	6	6	6	0.0228825	0.0356873	0.0591247	0.0587062
18	49295000	49300000	18	49480000	49485000	.	.	.	.	0,0,0	13	3.40369	3.43323	2.88132	3.4157	5	5	4	5	0.0201229	0.0350944	0.0195784	0.0522406
18	49395000	49400000	18	49455000	49460000	.	.	.	.	0,0,0	24	9.545	8.88823	8.92068	7.26255	9	9	9	8	0.00139856	0.00206957	0.00452125	0.000447412
18	49395000	49400000	18	49525000	49530000	.	.	.	.	0,0,0	34	6.42047	7.10207	10.8001	7.34912	8	8	10	8	2.389e-09	5.70892e-09	2.77784e-05	6.84902e-09
18	49415000	49420000	18	49525000	49530000	.	.	.	.	0,0,0	24	5.1185	6.13877	8.58282	10.0974	7	7	9	10	1.10059e-05	2.39246e-05	0.00452125	0.0318924
18	49455000	49460000	18	49500000	49505000	.	.	.	.	0,0,0	22	8.99055	8.36445	11.1467	6.14023	9	9	10	7	0.0054492	0.00767982	0.0787497	0.000261144
18	49455000	49460000	18	49525000	49530000	.	.	.	.	0,0,0	57	18.8717	18.03	23.8299	20.4061	12	12	13	13	2.01234e-10	3.31968e-10	7.76703e-07	7.17766e-07
18	49455000	49460000	18	49975000	49980000	.	.	.	.	0,0,0	18	4.63125	5.13016	6.97076	5.98024	6	7	8	7	0.000711911	0.00597717	0.0405628	0.010062
18	49735000	49740000	18	49785000	49790000	.	.	.	.	0,0,0	21	4.73668	4.0994	5.97269	1.38342	6	6	7	1	2.79519e-05	5.8423e-05	0.000729734	2.25763e-11
18	49735000	49740000	18	49920000	49925000	.	.	.	.	0,0,0	17	1.73078	2.1377	3.16117	1.63704	2	3	5	2	1.19063e-06	2.89054e-05	0.00113376	2.94292e-06
18	49735000	49740000	18	49980000	49985000	.	.	.	.	0,0,0	17	4.80829	4.30754	5.26242	3.19834	6	6	7	5	0.00197485	0.00372722	0.0209371	0.00138412
18	49915000	49920000	18	49965000	49970000	.	.	.	.	0,0,0	25	11.9202	11.6555	6.56576	8.65977	10	10	8	9	0.00663746	0.00803229	0.000218788	0.00202776
18	49915000	49920000	18	49975000	49980000	.	.	.	.	0,0,0	33	8.18217	10.6249	15.063	14.9849	9	10	11	11	4.30607e-07	3.12467e-05	0.00172605	0.00180921
18	49915000	49920000	18	49980000	49985000	.	.	.	.	0,0,0	34	6.84483	7.43214	9.55065	9.74081	8	8	9	9	2.389e-09	5.70892e-09	8.35911e-07	7.0995e-07
18	49915000	49920000	18	49985000	49990000	.	.	.	.	0,0,0	12	2.96403	3.15325	2.83892	2.92704	4	5	4	4	0.0209391	0.0690511	0.0483231	0.0489862
18	49920000	49925000	18	49965000	49970000	.	.	.	.	0,0,0	43	18.5511	17.034	13.0997	15.3755	12	12	11	11	2.93159e-05	3.21388e-05	8.02896e-07	8.82242e-07
18	49920000	49925000	18	49970000	49975000	.	.	.	.	0,0,0	15	4.6261	5.25463	5.59744	4.27009	6	7	7	6	0.0107279	0.0443084	0.0779212	0.0288497
18	49920000	49925000	18	49975000	49980000	.	.	.	.	0,0,0	47	11.3225	16.0022	23.2666	23.171	10	12	13	13	9.14259e-12	1.59843e-06	0.000524588	0.000543785
18	49920000	49925000	18	49980000	49985000	.	.	.	.	0,0,0	41	13.3488	13.3907	15.5516	10.3651	11	11	11	10	1.28208e-06	2.03795e-06	4.58324e-06	4.02115e-08
18	49925000	49930000	18	49965000	49970000	.	.	.	.	0,0,0	28	13.2663	10.1331	10.0485	4.03539	11	10	10	6	0.0118725	0.00124135	0.00269227	8.40802e-09
18	49930000	49935000	18	49965000	49970000	.	.	.	.	0,0,0	38	14.7565	13.0847	22.2703	9.36992	11	11	13	9	1.46076e-05	2.26092e-05	0.0371362	7.95408e-09
18	49930000	49935000	18	49980000	49985000	.	.	.	.	0,0,0	24	7.12434	9.11682	11.7835	10.0509	8	9	10	10	0.000133047	0.00206957	0.0294512	0.0318924
18	49965000	49970000	18	50000000	50005000	.	.	.	.	0,0,0	39	11.2858	15.6269	10.6898	12.0583	10	12	10	10	7.0096e-08	0.000423736	2.78164e-07	3.09047e-07
18	49975000	49980000	18	50275000	50280000	.	.	.	.	0,0,0	26	10.3805	7.93051	6.47288	14.7607	10	9	8	11	0.00350961	0.00045167	8.40075e-05	0.0691806
18	49975000	49980000	18	50670000	50675000	.	.	.	.	0,0,0	25	5.24874	6.96059	6.96878	12.289	7	8	8	10	3.53834e-06	0.000106803	0.000218788	0.0189756
18	50235000	50240000	18	50275000	50280000	.	.	.	.	0,0,0	20	8.61688	9.62575	8.2488	9.78239	9	9	9	9	0.0189875	0.0239339	0.0479493	0.0503354
18	50235000	50240000	18	50375000	50380000	.	.	.	.	0,0,0	11	1.91641	2.0362	2.24262	2.20182	2	3	3	3	0.0128071	0.0472408	0.0538051	0.0568751
18	50275000	50280000	18	50310000	50315000	.	.	.	.	0,0,0	29	5.25055	9.58335	10.9025	13.3653	7	9	10	11	2.75115e-08	3.74098e-05	0.00133429	0.0178204
18	50275000	50280000	18	50385000	50390000	.	.	.	.	0,0,0	25	5.28529	7.17251	6.41276	9.62412	7	8	8	9	3.53834e-06	0.000106803	0.000218788	0.00202776
18	50460000	50465000	18	50510000	50515000	.	.	.	.	0,0,0	19	2.71049	3.16537	2.03255	3.28592	4	5	3	5	5.56238e-06	0.000100417	9.67727e-07	0.000117658
18	50570000	50575000	18	50670000	50675000	.	.	.	.	0,0,0	39	6.85522	9.51432	13.6835	8.85729	8	9	11	9	3.07553e-12	9.84877e-10	2.37995e-05	2.4676e-09
18	50630000	50635000	18	50670000	50675000	.	.	.	.	0,0,0	52	28.7612	29.0256	22.6205	33.7508	14	14	13	15	0.00122656	0.001127	2.35525e-05	0.0754799
18	50660000	50665000	18	50695000	50700000	.	.	.	.	0,0,0	25	7.05171	10.0966	11.6258	5.89931	8	10	10	7	5.23604e-05	0.00803229	0.0174733	1.20295e-05
18	50660000	50665000	18	50885000	50890000	.	.	.	.	0,0,0	16	4.80106	6.00878	5.78854	5.97417	6	7	7	7	0.00461177	0.0236047	0.0419077	0.0437082
18	50670000	50675000	18	50775000	50780000	.	.	.	.	0,0,0	34	10.7076	16.0437	15.941	15.2427	10	12	12	11	7.72474e-06	0.00689358	0.0157276	0.000899618
18	50670000	50675000	18	50885000	50890000	.	.	.	.	0,0,0	30	8.61422	12.2975	12.7394	12.9648	9	10	11	11	8.73644e-06	0.000301853	0.0103142	0.0103054
18	50670000	50675000	18	50910000	50915000	.	.	.	.	0,0,0	28	7.43008	10.589	13.9714	11.8518	8	10	11	10	2.43993e-06	0.00124135	0.0287076	0.00303266
18	50835000	50840000	18	50885000	50890000	.	.	.	.	0,0,0	22	10.7794	9.77282	9.98904	9.73183	10	9	10	9	0.0353406	0.00767982	0.0787497	0.0160889
18	50840000	50845000	18	50955000	50960000	.	.	.	.	0,0,0	25	4.04587	3.87839	4.5428	5.70046	6	5	6	7	2.19242e-07	2.10011e-08	4.53679e-07	1.20295e-05
18	50885000	50890000	18	50925000	50930000	.	.	.	.	0,0,0	50	17.6896	25.7535	25.0018	29.5803	12	14	14	14	1.17134e-07	0.0028758	0.00568409	0.00582245
18	50885000	50890000	18	50940000	50945000	.	.	.	.	0,0,0	26	8.11933	10.4552	9.85256	11.6757	9	10	10	10	0.000299597	0.00450532	0.0097313	0.0106321
18	50885000	50890000	18	50955000	50960000	.	.	.	.	0,0,0	42	15.2899	15.4605	18.8684	19.5733	11	11	12	13	5.37477e-07	8.41065e-07	0.000172437	0.00714479
18	50905000	50910000	18	50940000	50945000	.	.	.	.	0,0,0	18	2.92137	6.04939	2.01131	5.34513	4	7	3	7	1.92072e-05	0.00597717	5.62161e-06	0.010062
18	50910000	50915000	18	50945000	50950000	.	.	.	.	0,0,0	16	3.18241	7.63502	4.63955	4.24586	5	8	6	6	0.00124328	0.0650454	0.0124265	0.0132102
18	51315000	51320000	18	51365000	51370000	.	.	.	.	0,0,0	17	6.15447	5.41128	3.46687	4.39469	7	7	5	6	0.00735115	0.0124709	0.00113376	0.00571705
18	51365000	51370000	18	51415000	51420000	.	.	.	.	0,0,0	41	15.7355	14.875	17.575	13.3201	12	11	12	11	0.000115978	2.03795e-06	0.000331991	5.50179e-06
18	51365000	51370000	18	51430000	51435000	.	.	.	.	0,0,0	37	9.42445	11.8416	18.9788	16.9169	9	10	12	12	5.13375e-09	9.52396e-07	0.00326503	0.00363813
18	51465000	51470000	18	51665000	51670000	.	.	.	.	0,0,0	13	2.06696	2.81773	3.30759	3.31093	3	4	5	5	0.00279279	0.0159952	0.0486373	0.0522406
18	51710000	51715000	18	51745000	51750000	.	.	.	.	0,0,0	23	7.22438	7.63451	10.4944	9.44325	8	8	10	9	0.000326575	0.000599721	0.0495526	0.0085689
18	51710000	51715000	18	51755000	51760000	.	.	.	.	0,0,0	19	8.473	7.01923	8.49188	9.76074	9	8	9	9	0.033828	0.0110845	0.0811282	0.0835667
18	51885000	51890000	18	51955000	51960000	.	.	.	.	0,0,0	18	6.60999	6.52038	6.95342	6.85508	8	8	8	8	0.0149558	0.020608	0.0405628	0.0395652
18	51900000	51905000	18	51950000	51955000	.	.	.	.	0,0,0	31	9.78685	14.6381	18.4831	17.4335	9	11	12	12	3.29237e-06	0.00256187	0.0549939	0.0597068
18	51905000	51910000	18	51955000	51960000	.	.	.	.	0,0,0	26	6.58003	9.93659	13.7351	13.2297	8	10	11	11	1.93359e-05	0.00450532	0.0708907	0.0691806
18	51910000	51915000	18	51955000	51960000	.	.	.	.	0,0,0	22	5.43505	7.37141	9.40432	11.0915	7	8	9	10	9.34461e-05	0.00131262	0.0153007	0.0805399
18	51920000	51925000	18	51955000	51960000	.	.	.	.	0,0,0	34	9.30631	20.4876	11.2447	10.7845	9	13	10	10	1.4607e-07	0.0838547	2.77784e-05	3.38331e-05
18	51955000	51960000	18	52015000	52020000	.	.	.	.	0,0,0	15	5.73426	5.0403	3.90213	6.21682	7	7	5	7	0.0291065	0.0443084	0.00832192	0.0788116
18	49975000	49980000	18	55350000	55355000	.	.	.	.	0,0,0	22	1.98285	2.00839	4.40924	1.98099	2	3	6	2	1.58528e-10	8.98177e-09	2.64616e-05	8.7075e-11
18	51900000	51905000	18	52035000	52040000	.	.	.	.	0,0,0	14	2.34904	3.36113	2.29226	2.82344	3	5	3	4	0.000848655	0.0163433	0.00238482	0.00726851
18	51955000	51960000	18	52060000	52065000	.	.	.	.	0,0,0	13	3.83461	3.42526	3.46129	2.9938	5	5	5	4	0.0201229	0.0350944	0.0486373	0.0198157
18	52265000	52270000	18	52460000	52465000	.	.	.	.	0,0,0	20	4.59904	4.29178	5.46728	4.52594	6	6	7	6	8.77235e-05	0.000185581	0.00186628	0.000258067
18	52425000	52430000	18	52460000	52465000	.	.	.	.	0,0,0	52	16.6502	19.4692	23.3986	15.1978	12	12	13	11	2.02001e-08	2.79209e-08	2.35525e-05	9.53863e-11
18	52950000	52955000	18	52985000	52990000	.	.	.	.	0,0,0	26	7.74076	10.9893	14.752	6.86641	8	10	11	8	1.93359e-05	0.00450532	0.0708907	6.84484e-05
18	52950000	52955000	18	52990000	52995000	.	.	.	.	0,0,0	42	7.89111	9.87566	17.4198	10.9253	9	10	12	10	9.6767e-12	6.46158e-09	0.000172437	1.43719e-08
18	52955000	52960000	18	52990000	52995000	.	.	.	.	0,0,0	25	6.5653	8.12744	11.6885	6.56652	8	9	10	8	5.23604e-05	0.000982892	0.0174733	0.000177305
18	53575000	53580000	18	54050000	54055000	.	.	.	.	0,0,0	14	3.49479	2.89237	3.30028	2.68431	5	4	5	4	0.00871876	0.00587831	0.0211163	0.00726851
18	53575000	53580000	18	54160000	54165000	.	.	.	.	0,0,0	15	1.93539	1.93657	3.87495	1.46262	2	2	5	1	4.03619e-05	7.64417e-05	0.00832192	1.419e-05
18	53820000	53825000	18	54050000	54055000	.	.	.	.	0,0,0	10	1.91157	1.74315	1.60427	1.42301	2	2	2	1	0.0365757	0.0732432	0.068945	0.029624
18	54070000	54075000	18	54125000	54130000	.	.	.	.	0,0,0	28	12.1564	12.229	12.5156	14.3387	10	10	11	11	0.000917176	0.00124135	0.0287076	0.0287996
18	54070000	54075000	18	54135000	54140000	.	.	.	.	0,0,0	26	9.91473	9.1828	11.6008	14.794	10	9	10	11	0.00350961	0.00045167	0.0097313	0.0691806
18	54090000	54095000	18	54135000	54140000	.	.	.	.	0,0,0	34	10.2681	10.3659	8.5702	13.0606	10	10	9	11	7.72474e-06	1.33892e-05	8.35911e-07	0.000899618
18	54095000	54100000	18	54135000	54140000	.	.	.	.	0,0,0	32	8.08306	10.245	11.9997	12.0173	9	10	10	10	1.24884e-06	7.03013e-05	0.000143669	0.000178515
18	54100000	54105000	18	54135000	54140000	.	.	.	.	0,0,0	22	5.13778	9.35152	9.4225	9.0133	7	9	9	9	9.34461e-05	0.00767982	0.0153007	0.0160889
18	54100000	54105000	18	54225000	54230000	.	.	.	.	0,0,0	16	2.9654	3.52506	3.29696	4.97282	4	5	5	7	0.000268037	0.00256764	0.00314124	0.0437082
18	54105000	54110000	18	54140000	54145000	.	.	.	.	0,0,0	20	5.4278	8.07651	6.27606	9.14691	7	9	8	9	0.000595801	0.0239339	0.0117797	0.0503354
18	54155000	54160000	18	54230000	54235000	.	.	.	.	0,0,0	17	4.94289	5.5813	5.02115	7.08187	6	7	7	8	0.00197485	0.0124709	0.0209371	0.0701872
18	54160000	54165000	18	54225000	54230000	.	.	.	.	0,0,0	25	7.40571	8.86435	8.17656	10.4721	8	9	9	10	5.23604e-05	0.000982892	0.00214828	0.0189756
18	54235000	54240000	18	54280000	54285000	.	.	.	.	0,0,0	25	6.49511	9.87846	9.54203	11.9541	8	10	9	10	5.23604e-05	0.00803229	0.00214828	0.0189756
18	54280000	54285000	18	54340000	54345000	.	.	.	.	0,0,0	15	4.82865	4.42442	5.52463	3.52009	6	6	7	5	0.0107279	0.0174153	0.0779212	0.00963794
18	53575000	53580000	18	55350000	55355000	.	.	.	.	0,0,0	15	1.66362	1.98904	3.33811	2.46556	2	3	5	3	4.03619e-05	0.000561407	0.00832192	0.000640135
18	54440000	54445000	18	54540000	54545000	.	.	.	.	0,0,0	25	7.26969	6.54893	5.07975	7.75178	8	8	7	8	5.23604e-05	0.000106803	1.16326e-05	0.000177305
18	54965000	54970000	18	55275000	55280000	.	.	.	.	0,0,0	11	1.99833	2.40934	2.36919	1.98449	3	3	3	2	0.0246042	0.0472408	0.0538051	0.0255303
18	55115000	55120000	18	55275000	55280000	.	.	.	.	0,0,0	20	4.9148	6.27167	7.55139	5.90114	6	8	8	7	8.77235e-05	0.00552989	0.0117797	0.00181023
18	55135000	55140000	18	55185000	55190000	.	.	.	.	0,0,0	37	16.3575	14.1041	16.0895	9.12004	12	11	12	9	0.00139352	4.69472e-05	0.00326503	2.39965e-08
18	55135000	55140000	18	55275000	55280000	.	.	.	.	0,0,0	22	5.46356	7.09814	6.89124	8.16071	7	8	8	9	9.34461e-05	0.00131262	0.00271474	0.0160889
18	55135000	55140000	18	55285000	55290000	.	.	.	.	0,0,0	13	2.47335	3.11854	3.60296	3.54414	3	4	5	5	0.00279279	0.0159952	0.0486373	0.0522406
18	55185000	55190000	18	55275000	55280000	.	.	.	.	0,0,0	39	13.6361	14.0698	11.7	21.3137	11	11	10	13	6.55908e-06	1.06053e-05	2.78164e-07	0.0253346
18	55225000	55230000	18	55275000	55280000	.	.	.	.	0,0,0	14	2.84395	3.40323	4.75208	4.11171	4	5	6	6	0.00312035	0.0163433	0.0591247	0.0587062
18	55255000	55260000	18	55290000	55295000	.	.	.	.	0,0,0	13	1.80542	3.40686	3.31295	2.11553	2	5	5	3	0.000990835	0.0350944	0.0486373	0.00750925
18	55275000	55280000	18	55370000	55375000	.	.	.	.	0,0,0	27	10.8261	11.526	9.59703	13.1271	10	10	9	11	0.00183564	0.00243569	0.00049474	0.0456097
18	55335000	55340000	18	55410000	55415000	.	.	.	.	0,0,0	18	5.97055	5.27743	5.92115	4.91501	7	7	7	6	0.00326602	0.00597717	0.00955531	0.00212992
18	55345000	55350000	18	55380000	55385000	.	.	.	.	0,0,0	25	6.30959	11.0965	8.13926	11.7523	8	10	9	10	5.23604e-05	0.00803229	0.00214828	0.0189756
18	55345000	55350000	18	55390000	55395000	.	.	.	.	0,0,0	50	15.2815	16.4439	21.958	22.7901	11	12	13	13	1.84495e-10	1.48299e-07	8.43596e-05	8.79529e-05
18	55350000	55355000	18	55385000	55390000	.	.	.	.	0,0,0	70	16.0963	27.9462	28.0682	27.1554	12	14	14	14	1.48571e-16	1.76592e-08	4.50075e-08	6.08435e-08
18	55350000	55355000	18	55390000	55395000	.	.	.	.	0,0,0	79	24.4336	25.9977	37.6513	33.0971	13	14	15	15	3.4887e-16	1.42673e-11	3.3208e-07	2.6368e-07
18	55350000	55355000	18	55520000	55525000	.	.	.	.	0,0,0	26	7.19033	10.93	12.5038	14.9241	8	10	11	11	1.93359e-05	0.00450532	0.0708907	0.0691806
18	55355000	55360000	18	55390000	55395000	.	.	.	.	0,0,0	27	5.60302	9.0237	9.55005	5.38312	7	9	9	7	3.24471e-07	0.000208112	0.00049474	9.46201e-07
18	55370000	55375000	18	55575000	55580000	.	.	.	.	0,0,0	17	3.81661	4.2233	3.45846	5.49125	5	6	5	7	0.000427159	0.00372722	0.00113376	0.0222102
18	55520000	55525000	18	55675000	55680000	.	.	.	.	0,0,0	19	9.54178	6.50744	9.12503	3.96994	9	8	9	6	0.033828	0.0110845	0.0811282	0.000789944
18	55570000	55575000	18	55650000	55655000	.	.	.	.	0,0,0	17	6.2543	6.65857	6.01098	7.71272	8	8	7	8	0.0279685	0.0372598	0.0209371	0.0701872
18	56065000	56070000	18	56150000	56155000	.	.	.	.	0,0,0	29	9.17933	9.23906	12.9434	10.2322	9	9	11	10	2.20184e-05	3.74098e-05	0.0173458	0.00154329
18	56085000	56090000	18	56170000	56175000	.	.	.	.	0,0,0	16	5.76072	5.45604	4.61111	5.98024	7	7	6	7	0.0151448	0.0236047	0.0124265	0.0437082
18	56150000	56155000	18	56290000	56295000	.	.	.	.	0,0,0	20	8.61627	6.33649	6.79043	7.51454	9	8	8	8	0.0189875	0.00552989	0.0117797	0.010513
18	56170000	56175000	18	56260000	56265000	.	.	.	.	0,0,0	19	7.23189	7.3579	6.66348	7.98089	8	8	8	9	0.00762887	0.0110845	0.0225188	0.0835667
18	56170000	56175000	18	56290000	56295000	.	.	.	.	0,0,0	19	7.77287	7.14014	9.10285	9.68905	8	8	9	9	0.00762887	0.0110845	0.0811282	0.0835667
18	56170000	56175000	18	56305000	56310000	.	.	.	.	0,0,0	29	9.1338	8.01271	7.76875	9.84952	9	9	8	10	2.20184e-05	3.74098e-05	3.5943e-06	0.00154329
18	56290000	56295000	18	56370000	56375000	.	.	.	.	0,0,0	27	8.00779	7.90653	7.31307	10.5511	9	9	8	10	0.000132942	0.000208112	2.88206e-05	0.00579741
18	56305000	56310000	18	56370000	56375000	.	.	.	.	0,0,0	34	11.1349	11.5822	17.4257	8.30741	10	10	12	9	7.72474e-06	1.33892e-05	0.0157276	7.0995e-07
18	56305000	56310000	18	56380000	56385000	.	.	.	.	0,0,0	14	5.69181	5.30123	4.46832	3.65104	7	7	6	5	0.0541706	0.0783645	0.0591247	0.0239566
18	56310000	56315000	18	56370000	56375000	.	.	.	.	0,0,0	24	8.05574	7.7851	7.60507	5.08217	9	8	8	7	0.00139856	0.000255271	0.000526658	3.59681e-05
18	56370000	56375000	18	56500000	56505000	.	.	.	.	0,0,0	16	6.89011	5.24106	5.24597	5.84316	8	7	7	7	0.0509687	0.0236047	0.0419077	0.0437082
18	56420000	56425000	18	56460000	56465000	.	.	.	.	0,0,0	22	4.29637	6.84387	9.22214	8.26209	6	8	9	9	8.79751e-06	0.00131262	0.0153007	0.0160889
18	56420000	56425000	18	56465000	56470000	.	.	.	.	0,0,0	23	5.57089	7.43269	12.1002	8.95776	7	8	10	9	3.42638e-05	0.000599721	0.0495526	0.0085689
18	56425000	56430000	18	56460000	56465000	.	.	.	.	0,0,0	18	6.09006	6.82955	6.86866	7.69045	7	8	8	8	0.00326602	0.020608	0.0405628	0.0395652
18	56460000	56465000	18	56615000	56620000	.	.	.	.	0,0,0	14	4.10002	4.36868	4.21474	4.91615	6	6	6	6	0.0228825	0.0356873	0.0591247	0.0587062
18	56500000	56505000	18	56565000	56570000	.	.	.	.	0,0,0	19	6.16101	7.31988	5.68594	9.02092	7	8	7	9	0.00143139	0.0110845	0.00440181	0.0835667
18	56575000	56580000	18	56615000	56620000	.	.	.	.	0,0,0	20	4.87578	6.97722	8.26467	7.07593	6	8	9	8	8.77235e-05	0.00552989	0.0479493	0.010513
18	56850000	56855000	18	56935000	56940000	.	.	.	.	0,0,0	20	8.63795	8.94964	7.57785	6.80496	9	9	8	8	0.0189875	0.0239339	0.0117797	0.010513
18	56920000	56925000	18	57075000	57080000	.	.	.	.	0,0,0	26	8.42332	9.39086	9.08622	10.9773	9	9	9	10	0.000299597	0.00045167	0.00104429	0.0106321
18	56935000	56940000	18	56995000	57000000	.	.	.	.	0,0,0	30	9.17491	9.85082	6.51541	14.6301	9	10	8	11	8.73644e-06	0.000301853	1.06878e-06	0.0103054
18	56935000	56940000	18	57085000	57090000	.	.	.	.	0,0,0	31	11.9822	12.2528	12.07	18.5224	10	10	10	12	9.8328e-05	0.000147501	0.000313698	0.0597068
18	56950000	56955000	18	57145000	57150000	.	.	.	.	0,0,0	20	9.13288	8.0932	8.24681	8.96099	9	9	9	9	0.0189875	0.0239339	0.0479493	0.0503354
18	56955000	56960000	18	57085000	57090000	.	.	.	.	0,0,0	35	8.96216	9.22083	8.76165	12.98	9	9	9	11	5.13126e-08	9.61738e-08	3.20275e-07	0.000480434
18	57050000	57055000	18	57085000	57090000	.	.	.	.	0,0,0	28	10.6781	16.1741	11.794	11.7383	10	12	10	10	0.000917176	0.0911664	0.00269227	0.00303266
18	57070000	57075000	18	57145000	57150000	.	.	.	.	0,0,0	29	10.1052	10.3132	10.9746	8.07452	10	10	10	9	0.000436949	0.000631809	0.00133429	7.83373e-05
18	57085000	57090000	18	57145000	57150000	.	.	.	.	0,0,0	63	17.6255	20.4217	16.667	34.8069	12	13	12	15	3.76147e-13	1.72057e-09	1.83763e-12	0.00147196
18	57085000	57090000	18	57230000	57235000	.	.	.	.	0,0,0	22	11.6437	10.4078	9.97855	9.54762	10	10	10	9	0.0353406	0.0377448	0.0787497	0.0160889
18	57095000	57100000	18	57210000	57215000	.	.	.	.	0,0,0	12	3.3867	3.37904	2.95293	2.98267	5	5	4	4	0.0434891	0.0690511	0.0483231	0.0489862
18	57145000	57150000	18	57230000	57235000	.	.	.	.	0,0,0	38	11.7546	15.3537	20.1749	16.3371	10	11	13	12	1.83632e-07	2.26092e-05	0.0371362	0.00211685
18	57145000	57150000	18	57275000	57280000	.	.	.	.	0,0,0	34	13.2594	10.9595	9.21539	12.1019	11	10	9	10	0.000299525	1.33892e-05	8.35911e-07	3.38331e-05
18	57225000	57230000	18	57275000	57280000	.	.	.	.	0,0,0	51	8.40339	11.675	12.6261	17.1553	9	10	11	12	1.98818e-17	1.31502e-13	3.07357e-10	1.85998e-07
18	57230000	57235000	18	57275000	57280000	.	.	.	.	0,0,0	60	20.3555	19.3561	21.7312	27.0202	13	12	13	14	2.06576e-08	1.80845e-11	7.83624e-08	4.56295e-05
18	57520000	57525000	18	57590000	57595000	.	.	.	.	0,0,0	24	11.4731	11.6919	12.007	10.0288	10	10	10	10	0.0119845	0.0139666	0.0294512	0.0318924
18	58390000	58395000	18	58505000	58510000	.	.	.	.	0,0,0	19	6.78651	6.16725	8.93084	7.66759	8	7	9	8	0.00762887	0.0027782	0.0811282	0.0214388
18	58390000	58395000	18	58590000	58595000	.	.	.	.	0,0,0	17	8.22614	4.53683	5.47	6.42337	9	6	7	8	0.0947081	0.00372722	0.0209371	0.0701872
18	58390000	58395000	18	58685000	58690000	.	.	.	.	0,0,0	23	4.47369	4.81562	7.77286	4.67349	6	6	8	6	2.61366e-06	5.72864e-06	0.00126515	7.96476e-06
18	58390000	58395000	18	58690000	58695000	.	.	.	.	0,0,0	17	2.7093	2.66638	4.62654	3.55003	4	4	6	5	7.70591e-05	0.000149312	0.00586356	0.00138412
18	58400000	58405000	18	58485000	58490000	.	.	.	.	0,0,0	12	2.05422	2.45452	2.32642	3.12331	3	3	3	4	0.00902681	0.0201631	0.0224015	0.0489862
18	58445000	58450000	18	58485000	58490000	.	.	.	.	0,0,0	39	6.95465	10.9003	19.7184	18.3934	8	10	13	12	3.07553e-12	1.34465e-07	0.0255814	0.00118106
18	58445000	58450000	18	58490000	58495000	.	.	.	.	0,0,0	31	8.15102	9.60882	15.4347	13.8151	9	9	11	11	3.29237e-06	6.09248e-06	0.00590373	0.00594302
18	58445000	58450000	18	58590000	58595000	.	.	.	.	0,0,0	25	6.70726	8.53891	6.52989	12.2166	8	9	8	10	5.23604e-05	0.000982892	0.000218788	0.0189756
18	58445000	58450000	18	58685000	58690000	.	.	.	.	0,0,0	29	10.6741	10.5953	13.2426	11.7464	10	10	11	10	0.000436949	0.000631809	0.0173458	0.00154329
18	58465000	58470000	18	58525000	58530000	.	.	.	.	0,0,0	36	13.4834	16.1411	17.6951	20.5	11	12	12	13	7.05814e-05	0.00245952	0.00572233	0.0781764
18	58505000	58510000	18	58690000	58695000	.	.	.	.	0,0,0	15	4.5064	4.30003	4.71473	5.93346	6	6	6	7	0.0107279	0.0174153	0.0275802	0.0788116
18	58520000	58525000	18	58685000	58690000	.	.	.	.	0,0,0	28	10.1341	12.8078	12.5834	15.2459	10	11	11	11	0.000917176	0.013347	0.0287076	0.0287996
18	58525000	58530000	18	58590000	58595000	.	.	.	.	0,0,0	31	8.00817	10.1313	9.15475	9.5831	9	10	9	9	3.29237e-06	0.000147501	1.52064e-05	1.22493e-05
18	58585000	58590000	18	58685000	58690000	.	.	.	.	0,0,0	19	6.32789	6.5596	8.60632	8.73889	8	8	9	9	0.00762887	0.0110845	0.0811282	0.0835667
18	58590000	58595000	18	58685000	58690000	.	.	.	.	0,0,0	43	8.21395	11.0019	22.0389	12.1321	9	10	13	10	2.31071e-12	2.26906e-09	0.00441819	4.82878e-09
18	58790000	58795000	18	58850000	58855000	.	.	.	.	0,0,0	32	15.3059	12.9316	17.2476	12.4491	11	11	12	11	0.00114759	0.00145406	0.0386574	0.00336471
18	58835000	58840000	18	58915000	58920000	.	.	.	.	0,0,0	12	2.90571	2.90036	2.87209	2.74772	4	4	4	4	0.0209391	0.0353788	0.0483231	0.0489862
18	58850000	58855000	18	58925000	58930000	.	.	.	.	0,0,0	14	4.24173	4.18524	4.63337	4.34446	6	6	6	6	0.0228825	0.0356873	0.0591247	0.0587062
18	58790000	58795000	18	59115000	59120000	.	.	.	.	0,0,0	20	8.00432	5.22048	5.74671	7.39608	9	7	7	8	0.0189875	0.00125312	0.00186628	0.010513
18	58520000	58525000	18	64115000	64120000	.	.	.	.	0,0,0	16	1.88152	1.8364	2.23178	3.15208	2	2	3	5	6.88078e-06	1.39668e-05	0.000151215	0.0035613
18	58525000	58530000	18	64790000	64795000	.	.	.	.	0,0,0	13	1.75916	2.27607	3.03625	3.29491	2	3	4	5	0.000990835	0.00654614	0.0195784	0.0522406
18	58685000	58690000	18	64115000	64120000	.	.	.	.	0,0,0	12	2.40823	1.40352	1.34922	1.77372	3	1	1	2	0.00902681	0.00227881	0.00291149	0.00774442
18	62465000	62470000	18	62505000	62510000	.	.	.	.	0,0,0	33	4.19871	5.13225	5.34839	10.8402	6	7	7	10	7.41273e-13	4.13314e-10	2.5569e-10	8.02338e-05
18	62470000	62475000	18	62510000	62515000	.	.	.	.	0,0,0	16	4.90937	3.17456	1.824	4.66709	6	5	2	6	0.00461177	0.00256764	1.89483e-05	0.0132102
18	62495000	62500000	18	62825000	62830000	.	.	.	.	0,0,0	12	2.86326	2.68302	3.09884	2.05893	4	4	4	3	0.0209391	0.0353788	0.0483231	0.0224049
18	62495000	62500000	18	62885000	62890000	.	.	.	.	0,0,0	14	1.46464	2.19858	4.80275	3.08209	1	3	6	4	4.42753e-05	0.00211409	0.0591247	0.00726851
18	63270000	63275000	18	63315000	63320000	.	.	.	.	0,0,0	33	10.6324	10.7295	14.8008	14.7145	10	10	11	11	1.86509e-05	3.12467e-05	0.00172605	0.00180921
18	63295000	63300000	18	63420000	63425000	.	.	.	.	0,0,0	17	4.02081	4.74059	4.99338	6.99421	6	6	7	8	0.00197485	0.00372722	0.0209371	0.0701872
18	63315000	63320000	18	63420000	63425000	.	.	.	.	0,0,0	26	8.58307	9.56642	9.83266	13.8265	9	9	9	11	0.000299597	0.00045167	0.00104429	0.0691806
18	63335000	63340000	18	63415000	63420000	.	.	.	.	0,0,0	22	3.97378	4.56615	3.93728	4.53281	6	6	5	6	8.79751e-06	1.75017e-05	1.74626e-06	2.69565e-05
18	63780000	63785000	18	63815000	63820000	.	.	.	.	0,0,0	32	1.42832	6.28342	6.5583	11.3107	1	8	8	10	9.88473e-25	5.21144e-08	1.09524e-07	0.000178515
18	63640000	63645000	18	63865000	63870000	.	.	.	.	0,0,0	15	5.49041	3.84201	5.6467	4.73213	7	5	7	6	0.0291065	0.00690573	0.0779212	0.0288497
18	63780000	63785000	18	63865000	63870000	.	.	.	.	0,0,0	18	5.2389	6.37943	5.49874	6.39526	7	8	7	8	0.00326602	0.020608	0.00955531	0.0395652
18	63785000	63790000	18	63865000	63870000	.	.	.	.	0,0,0	19	7.00679	7.73865	8.0851	8.89866	8	8	9	9	0.00762887	0.0110845	0.0811282	0.0835667
18	63815000	63820000	18	64010000	64015000	.	.	.	.	0,0,0	22	9.04036	6.88026	6.49529	6.49585	9	8	8	8	0.0054492	0.00131262	0.00271474	0.00247951
18	63865000	63870000	18	63920000	63925000	.	.	.	.	0,0,0	47	19.7381	21.981	28.8633	25.0431	13	13	14	14	0.000216701	0.000198643	0.0192441	0.0193417
18	63865000	63870000	18	63930000	63935000	.	.	.	.	0,0,0	30	8.68317	10.2147	10.3637	10.5837	9	10	10	10	8.73644e-06	0.000301853	0.000638216	0.000781155
18	63865000	63870000	18	64010000	64015000	.	.	.	.	0,0,0	27	9.85553	10.7705	11.2647	9.80915	10	10	10	9	0.00183564	0.00243569	0.00512333	0.000441327
18	63865000	63870000	18	64045000	64050000	.	.	.	.	0,0,0	38	15.564	14.8828	19.6521	14.2427	12	11	13	11	0.000776937	2.26092e-05	0.0371362	5.35069e-05
18	63885000	63890000	18	63965000	63970000	.	.	.	.	0,0,0	22	6.16185	6.9672	9.02573	7.4472	7	8	9	8	9.34461e-05	0.00131262	0.0153007	0.00247951
18	63910000	63915000	18	64115000	64120000	.	.	.	.	0,0,0	32	5.57269	5.9522	3.46759	7.0575	7	7	5	8	4.44543e-10	1.1797e-09	6.62555e-14	7.94312e-08
18	63910000	63915000	18	64555000	64560000	.	.	.	.	0,0,0	10	2.00051	1.82434	1.89877	1.88071	3	2	2	2	0.0605654	0.0732432	0.068945	0.0743431
18	63915000	63920000	18	64115000	64120000	.	.	.	.	0,0,0	17	5.06974	5.14809	3.36649	5.40158	7	7	5	7	0.00735115	0.0124709	0.00113376	0.0222102
18	63915000	63920000	18	64790000	64795000	.	.	.	.	0,0,0	22	2.45203	3.75703	7.17267	4.81386	3	5	8	6	1.53569e-09	1.76596e-06	0.00271474	2.69565e-05
18	63915000	63920000	18	64875000	64880000	.	.	.	.	0,0,0	12	1.57188	1.75341	2.0556	2.92189	1	2	3	4	0.00130973	0.0078592	0.0224015	0.0489862
18	63920000	63925000	18	64115000	64120000	.	.	.	.	0,0,0	24	5.56587	4.68258	3.92835	4.46637	7	6	5	6	1.10059e-05	1.55452e-06	8.96384e-08	2.27628e-06
18	64010000	64015000	18	64045000	64050000	.	.	.	.	0,0,0	37	10.1783	12.447	12.6881	15.0745	10	11	11	11	4.93615e-07	4.69472e-05	0.000112298	0.000110166
18	64010000	64015000	18	64090000	64095000	.	.	.	.	0,0,0	12	3.2268	2.73586	2.59171	3.06189	5	4	4	4	0.0434891	0.0353788	0.0483231	0.0489862
18	64045000	64050000	18	64085000	64090000	.	.	.	.	0,0,0	15	4.55387	4.58467	3.95641	5.20662	6	6	6	7	0.0107279	0.0174153	0.0275802	0.0788116
18	64045000	64050000	18	64115000	64120000	.	.	.	.	0,0,0	30	13.681	15.5538	17.5319	12.0456	11	11	12	10	0.00383566	0.00450241	0.0799876	0.000781155
18	64045000	64050000	18	64790000	64795000	.	.	.	.	0,0,0	20	4.22158	7.54793	5.75027	9.28639	6	8	7	9	8.77235e-05	0.00552989	0.00186628	0.0503354
18	64045000	64050000	18	64835000	64840000	.	.	.	.	0,0,0	22	5.25472	4.98746	6.17092	5.78843	7	7	7	7	9.34461e-05	0.000186378	0.0002794	0.000261144
18	64115000	64120000	18	64195000	64200000	.	.	.	.	0,0,0	25	6.64712	6.62816	5.82375	5.25363	8	8	7	7	5.23604e-05	0.000106803	1.16326e-05	1.20295e-05
18	64115000	64120000	18	64210000	64215000	.	.	.	.	0,0,0	18	6.29248	6.69091	7.12709	4.11613	8	8	8	6	0.0149558	0.020608	0.0405628	0.00212992
18	64115000	64120000	18	64215000	64220000	.	.	.	.	0,0,0	34	12.3256	11.4872	16.3609	7.48814	10	10	12	8	7.72474e-06	1.33892e-05	0.0157276	6.84902e-09
18	64115000	64120000	18	64545000	64550000	.	.	.	.	0,0,0	17	2.84661	3.33671	4.49373	4.31356	4	5	6	6	7.70591e-05	0.000994097	0.00586356	0.00571705
18	64115000	64120000	18	64555000	64560000	.	.	.	.	0,0,0	31	7.10951	6.08484	9.94043	9.46678	8	7	10	9	8.33059e-08	4.39181e-09	0.000313698	1.22493e-05
18	64115000	64120000	18	64560000	64565000	.	.	.	.	0,0,0	18	3.81471	3.80455	6.39779	3.08875	5	5	8	4	0.000129896	0.00032402	0.0405628	4.48753e-05
18	64115000	64120000	18	64785000	64790000	.	.	.	.	0,0,0	15	2.04937	2.23028	3.98272	2.34673	3	3	6	3	0.00020407	0.000561407	0.0275802	0.000640135
18	64115000	64120000	18	64790000	64795000	.	.	.	.	0,0,0	37	5.41383	5.97435	11.1339	5.53801	7	7	10	7	2.01151e-13	8.28075e-13	1.89428e-06	5.56242e-13
18	64115000	64120000	18	64860000	64865000	.	.	.	.	0,0,0	19	1.7807	3.06851	5.07284	1.39205	2	4	7	1	4.64289e-08	1.01146e-05	0.00440181	2.27526e-09
18	64115000	64120000	18	64875000	64880000	.	.	.	.	0,0,0	25	2.20368	3.6472	5.42285	2.73799	3	5	7	4	3.51187e-12	2.10011e-08	1.16326e-05	3.14608e-10
18	64195000	64200000	18	64555000	64560000	.	.	.	.	0,0,0	12	2.30199	2.48047	3.56111	2.40929	3	3	5	3	0.00902681	0.0201631	0.0986332	0.0224049
18	64215000	64220000	18	64255000	64260000	.	.	.	.	0,0,0	20	8.11807	7.87921	9.01024	6.00531	9	9	9	7	0.0189875	0.0239339	0.0479493	0.00181023
18	64295000	64300000	18	64330000	64335000	.	.	.	.	0,0,0	13	2.77146	3.30574	3.48448	2.85255	4	5	5	4	0.00846838	0.0350944	0.0486373	0.0198157
18	64515000	64520000	18	64560000	64565000	.	.	.	.	0,0,0	14	4.45671	3.18336	4.03154	4.26831	6	5	6	6	0.0228825	0.0163433	0.0591247	0.0587062
18	64640000	64645000	18	64770000	64775000	.	.	.	.	0,0,0	16	3.58877	4.71259	3.74605	3.28898	5	6	5	5	0.00124328	0.00815994	0.00314124	0.0035613
18	64640000	64645000	18	64835000	64840000	.	.	.	.	0,0,0	19	7.05758	7.236	6.28146	6.37104	8	8	8	8	0.00762887	0.0110845	0.0225188	0.0214388
18	64685000	64690000	18	64770000	64775000	.	.	.	.	0,0,0	12	1.77365	3.62366	2.37671	2.62702	2	5	3	4	0.00370862	0.0690511	0.0224015	0.0489862
18	64685000	64690000	18	64775000	64780000	.	.	.	.	0,0,0	12	1.95954	3.71575	2.71107	3.03128	2	5	4	4	0.00370862	0.0690511	0.0483231	0.0489862
18	64695000	64700000	18	64760000	64765000	.	.	.	.	0,0,0	28	5.3702	5.11403	8.80376	5.96215	7	7	9	7	9.60529e-08	1.87304e-07	0.00021104	2.58436e-07
18	64775000	64780000	18	64875000	64880000	.	.	.	.	0,0,0	20	7.02811	6.42094	8.09163	4.27763	8	8	9	6	0.00365306	0.00552989	0.0479493	0.000258067
18	64785000	64790000	18	64875000	64880000	.	.	.	.	0,0,0	24	5.02026	5.90732	7.64367	6.91704	7	7	8	8	1.10059e-05	2.39246e-05	0.000526658	0.000447412
18	64790000	64795000	18	64835000	64840000	.	.	.	.	0,0,0	68	18.4621	30.4694	36.4856	32.7334	12	14	15	15	1.47535e-15	7.45696e-08	0.000185026	0.000169518
18	64790000	64795000	18	64870000	64875000	.	.	.	.	0,0,0	32	12.5224	15.523	18.8203	14.875	11	11	12	11	0.00114759	0.00145406	0.0386574	0.00336471
18	65150000	65155000	18	65245000	65250000	.	.	.	.	0,0,0	12	2.09266	3.47308	3.23675	2.80413	3	5	5	4	0.00902681	0.0690511	0.0986332	0.0489862
19	4695000	4700000	19	4765000	4770000	.	.	.	.	0,0,0	12	2.51715	2.64792	3.17043	2.4784	4	4	5	3	0.0209391	0.0353788	0.0986332	0.0224049
19	8260000	8265000	19	8410000	8415000	.	.	.	.	0,0,0	29	9.03363	5.69164	5.43768	9.22001	9	7	7	9	2.20184e-05	5.32552e-08	7.96182e-08	7.83373e-05
19	8265000	8270000	19	8400000	8405000	.	.	.	.	0,0,0	20	6.77703	5.07346	5.43301	9.18724	8	7	7	9	0.00365306	0.00125312	0.00186628	0.0503354
19	8265000	8270000	19	8410000	8415000	.	.	.	.	0,0,0	19	8.32135	5.32391	4.73854	7.99427	9	7	6	9	0.033828	0.0027782	0.000831562	0.0835667
19	8300000	8305000	19	8340000	8345000	.	.	.	.	0,0,0	31	6.59706	8.87863	9.62594	9.69105	8	9	9	9	8.33059e-08	6.09248e-06	1.52064e-05	1.22493e-05
19	8300000	8305000	19	8350000	8355000	.	.	.	.	0,0,0	23	7.35678	8.67484	11.3473	10.4174	8	9	10	10	0.000326575	0.00412107	0.0495526	0.051787
19	8300000	8305000	19	8360000	8365000	.	.	.	.	0,0,0	23	5.2162	7.48454	7.36275	6.22469	7	8	8	7	3.42638e-05	0.000599721	0.00126515	0.000103363
19	8340000	8345000	19	8410000	8415000	.	.	.	.	0,0,0	22	7.01729	7.17339	7.82621	8.42902	8	8	8	9	0.000735879	0.00131262	0.00271474	0.0160889
19	8410000	8415000	19	8485000	8490000	.	.	.	.	0,0,0	15	2.35133	2.3968	3.48895	4.25939	3	3	5	6	0.00020407	0.000561407	0.00832192	0.0288497
19	9190000	9195000	19	9260000	9265000	.	.	.	.	0,0,0	32	8.02419	6.88274	6.71979	10.6723	9	8	8	10	1.24884e-06	5.21144e-08	1.09524e-07	0.000178515
19	9205000	9210000	19	9255000	9260000	.	.	.	.	0,0,0	19	5.09435	6.04302	8.31236	9.7604	7	7	9	9	0.00143139	0.0027782	0.0811282	0.0835667
19	10220000	10225000	19	10465000	10470000	.	.	.	.	0,0,0	17	6.49136	5.55789	7.66314	6.85952	8	7	8	8	0.0279685	0.0124709	0.0725713	0.0701872
19	10340000	10345000	19	10375000	10380000	.	.	.	.	0,0,0	38	9.19667	12.3064	14.4784	7.45364	9	10	11	8	1.59876e-09	3.56594e-07	5.21903e-05	6.66456e-11
19	10375000	10380000	19	10425000	10430000	.	.	.	.	0,0,0	62	21.0594	21.4928	18.7736	21.5084	13	13	12	13	3.90262e-09	4.02988e-09	5.42255e-12	1.62388e-08
19	10375000	10380000	19	10430000	10435000	.	.	.	.	0,0,0	33	13.0596	14.0591	12.8228	15.2557	11	11	11	11	0.000585825	0.000751241	0.00172605	0.00180921
19	10375000	10380000	19	10435000	10440000	.	.	.	.	0,0,0	31	12.5989	14.5691	15.7183	14.4379	11	11	12	11	0.00210759	0.00256187	0.0549939	0.00594302
19	10390000	10395000	19	10435000	10440000	.	.	.	.	0,0,0	19	5.80208	7.18631	6.84686	9.05994	7	8	8	9	0.00143139	0.0110845	0.0225188	0.0835667
19	12470000	12475000	19	12525000	12530000	.	.	.	.	0,0,0	22	6.80634	7.99725	8.98791	9.71711	8	9	9	9	0.000735879	0.00767982	0.0153007	0.0160889
19	12475000	12480000	19	12525000	12530000	.	.	.	.	0,0,0	33	9.40548	11.5755	12.7197	14.769	9	10	11	11	4.30607e-07	3.12467e-05	0.00172605	0.00180921
19	12525000	12530000	19	12560000	12565000	.	.	.	.	0,0,0	72	8.10546	11.9408	11.7505	19.0444	9	10	10	12	1.00172e-32	6.91761e-27	5.6219e-27	4.66206e-17
19	13985000	13990000	19	14090000	14095000	.	.	.	.	0,0,0	32	11.3913	17.0105	15.7834	16.6844	10	12	12	12	4.35595e-05	0.0182033	0.0386574	0.0414278
19	14025000	14030000	19	14090000	14095000	.	.	.	.	0,0,0	60	19.3394	20.572	24.9647	25.4263	12	13	14	14	9.78802e-12	2.09499e-08	3.76568e-05	4.56295e-05
19	14045000	14050000	19	14090000	14095000	.	.	.	.	0,0,0	38	10.6304	14.2719	18.4882	17.9451	10	11	12	12	1.83632e-07	2.26092e-05	0.001847	0.00211685
19	14060000	14065000	19	14095000	14100000	.	.	.	.	0,0,0	23	8.81376	9.54983	9.84441	9.10784	9	9	9	9	0.00280214	0.00412107	0.00841452	0.0085689
19	14090000	14095000	19	14530000	14535000	.	.	.	.	0,0,0	22	3.04832	4.30825	5.87647	6.83062	4	6	7	8	5.64363e-08	1.75017e-05	0.0002794	0.00247951
19	14090000	14095000	19	14535000	14540000	.	.	.	.	0,0,0	21	3.79299	4.83521	5.80134	7.98782	5	6	7	9	2.62742e-06	5.8423e-05	0.000729734	0.029154
19	14405000	14410000	19	14755000	14760000	.	.	.	.	0,0,0	16	4.04756	3.82767	5.68133	3.52299	6	5	7	5	0.00461177	0.00256764	0.0419077	0.0035613
19	14415000	14420000	19	14655000	14660000	.	.	.	.	0,0,0	20	9.18127	7.7746	8.00799	7.19512	9	8	9	8	0.0189875	0.00552989	0.0479493	0.010513
19	14440000	14445000	19	14535000	14540000	.	.	.	.	0,0,0	31	8.73716	11.8892	15.4467	10.8643	9	10	11	10	3.29237e-06	0.000147501	0.00590373	0.000368122
19	14445000	14450000	19	14485000	14490000	.	.	.	.	0,0,0	34	7.71848	13.0848	16.6963	10.2687	8	11	12	10	2.389e-09	0.000391567	0.0157276	3.38331e-05
19	14445000	14450000	19	14530000	14535000	.	.	.	.	0,0,0	36	9.87898	14.2522	22.614	11.155	10	11	13	10	1.27911e-06	0.000102075	0.0760351	5.64738e-06
19	14445000	14450000	19	14550000	14555000	.	.	.	.	0,0,0	15	4.43391	4.99981	5.22817	4.60162	6	7	7	6	0.0107279	0.0443084	0.0779212	0.0288497
19	14485000	14490000	19	14530000	14535000	.	.	.	.	0,0,0	49	13.5288	16.0549	11.0515	27.6818	11	12	10	14	5.49818e-10	3.47347e-07	2.70234e-12	0.00882035
19	14485000	14490000	19	14535000	14540000	.	.	.	.	0,0,0	56	13.4611	19.2875	24.0177	25.0186	11	12	13	14	2.35893e-13	8.08589e-10	1.59775e-06	0.000351157
19	14485000	14490000	19	14540000	14545000	.	.	.	.	0,0,0	34	11.7556	14.668	18.5234	13.6423	10	11	12	11	7.72474e-06	0.000391567	0.0157276	0.000899618
19	14490000	14495000	19	14530000	14535000	.	.	.	.	0,0,0	26	9.22259	11.0486	11.086	14.2855	9	10	10	11	0.000299597	0.00450532	0.0097313	0.0691806
19	14490000	14495000	19	14545000	14550000	.	.	.	.	0,0,0	20	5.98335	7.05982	8.47739	8.54715	7	8	9	9	0.000595801	0.00552989	0.0479493	0.0503354
19	14535000	14540000	19	14620000	14625000	.	.	.	.	0,0,0	14	3.32274	3.86922	3.51483	4.62922	5	5	5	6	0.00871876	0.0163433	0.0211163	0.0587062
19	14615000	14620000	19	14755000	14760000	.	.	.	.	0,0,0	19	7.02914	5.1309	7.32814	7.08481	8	7	8	8	0.00762887	0.0027782	0.0225188	0.0214388
19	14635000	14640000	19	14670000	14675000	.	.	.	.	0,0,0	25	5.09514	10.9069	5.52728	6.34738	7	10	7	8	3.53834e-06	0.00803229	1.16326e-05	0.000177305
19	14635000	14640000	19	14690000	14695000	.	.	.	.	0,0,0	17	5.35123	5.91316	6.05883	7.11562	7	7	7	8	0.00735115	0.0124709	0.0209371	0.0701872
19	14635000	14640000	19	14755000	14760000	.	.	.	.	0,0,0	20	6.4773	6.15734	8.78311	7.94109	8	7	9	9	0.00365306	0.00125312	0.0479493	0.0503354
19	14640000	14645000	19	14755000	14760000	.	.	.	.	0,0,0	20	5.54319	6.03959	7.38307	8.61946	7	7	8	9	0.000595801	0.00125312	0.0117797	0.0503354
19	17245000	17250000	19	17350000	17355000	.	.	.	.	0,0,0	20	5.83098	5.92674	8.79218	6.16756	7	7	9	7	0.000595801	0.00125312	0.0479493	0.00181023
19	17660000	17665000	19	17700000	17705000	.	.	.	.	0,0,0	18	3.01337	5.51977	5.47863	6.71721	4	7	7	8	1.92072e-05	0.00597717	0.00955531	0.0395652
19	18280000	18285000	19	18330000	18335000	.	.	.	.	0,0,0	34	8.87029	9.93575	18.6709	11.9853	9	10	12	10	1.4607e-07	1.33892e-05	0.0157276	3.38331e-05
19	18330000	18335000	19	18590000	18595000	.	.	.	.	0,0,0	26	8.91659	10.3051	9.34168	8.40191	9	10	9	9	0.000299597	0.00450532	0.00104429	0.000948172
19	18330000	18335000	19	18635000	18640000	.	.	.	.	0,0,0	25	8.16421	9.54398	10.3209	10.2202	9	9	10	10	0.000657915	0.000982892	0.0174733	0.0189756
19	18330000	18335000	19	18765000	18770000	.	.	.	.	0,0,0	15	6.73113	5.74686	5.60601	5.67442	8	7	7	7	0.0866935	0.0443084	0.0779212	0.0788116
19	18430000	18435000	19	18665000	18670000	.	.	.	.	0,0,0	18	6.00586	4.98651	7.06515	5.1038	7	7	8	7	0.00326602	0.00597717	0.0405628	0.010062
19	18570000	18575000	19	18635000	18640000	.	.	.	.	0,0,0	26	8.57235	9.07302	11.7564	12.1198	9	9	10	10	0.000299597	0.00045167	0.0097313	0.0106321
19	18570000	18575000	19	18655000	18660000	.	.	.	.	0,0,0	24	8.40078	7.67025	8.12945	8.14536	9	8	9	9	0.00139856	0.000255271	0.00452125	0.00427756
19	18575000	18580000	19	18635000	18640000	.	.	.	.	0,0,0	23	8.87052	8.73817	8.73622	11.7543	9	9	9	10	0.00280214	0.00412107	0.00841452	0.051787
19	18590000	18595000	19	18635000	18640000	.	.	.	.	0,0,0	56	6.40372	13.012	25.175	21.8734	8	11	14	13	9.87145e-25	5.35813e-13	0.000321249	1.4361e-06
19	18590000	18595000	19	18640000	18645000	.	.	.	.	0,0,0	30	11.9253	15.3134	17.2772	15.6247	10	11	12	12	0.000210039	0.00450241	0.0799876	0.0855084
19	18590000	18595000	19	18645000	18650000	.	.	.	.	0,0,0	23	7.13334	10.3918	10.6947	10.6387	8	10	10	10	0.000326575	0.0232949	0.0495526	0.051787
19	18590000	18595000	19	18655000	18660000	.	.	.	.	0,0,0	44	13.6061	14.1648	15.8955	15.7038	11	11	12	12	8.38441e-08	1.43339e-07	4.60663e-05	4.56896e-05
19	18665000	18670000	19	18765000	18770000	.	.	.	.	0,0,0	18	6.20729	6.48714	6.69844	7.62153	7	8	8	8	0.00326602	0.020608	0.0405628	0.0395652
19	18740000	18745000	19	18820000	18825000	.	.	.	.	0,0,0	19	4.55394	5.36517	6.34009	5.96069	6	7	8	7	0.000269132	0.0027782	0.0225188	0.00453518
19	19910000	19915000	19	20140000	20145000	.	.	.	.	0,0,0	11	2.38444	2.37005	2.41978	2.3418	3	3	3	3	0.0246042	0.0472408	0.0538051	0.0568751
19	19980000	19985000	19	20060000	20065000	.	.	.	.	0,0,0	38	14.7108	16.6293	16.8858	17.0455	11	12	12	12	1.46076e-05	0.00077613	0.001847	0.00211685
19	19980000	19985000	19	20095000	20100000	.	.	.	.	0,0,0	47	22.3654	22.3916	25.6201	24.1194	13	13	14	13	0.000216701	0.000198643	0.0192441	0.000543785
19	19980000	19985000	19	20120000	20125000	.	.	.	.	0,0,0	24	10.3347	10.4948	8.33349	10.1671	10	10	9	10	0.0119845	0.0139666	0.00452125	0.0318924
19	19980000	19985000	19	20125000	20130000	.	.	.	.	0,0,0	26	13.7202	12.9079	10.9579	13.4805	11	11	10	11	0.0322498	0.0339882	0.0097313	0.0691806
19	19980000	19985000	19	20140000	20145000	.	.	.	.	0,0,0	56	24.8463	16.8317	20.8137	25.868	14	12	13	14	0.000152361	8.08589e-10	1.59775e-06	0.000351157
19	19995000	20000000	19	20100000	20105000	.	.	.	.	0,0,0	16	5.33118	6.07841	6.09288	5.3767	7	7	7	7	0.0151448	0.0236047	0.0419077	0.0437082
19	20060000	20065000	19	20095000	20100000	.	.	.	.	0,0,0	34	9.44376	20.9725	12.4659	14.4817	9	13	11	11	1.4607e-07	0.0838547	0.000880541	0.000899618
19	20100000	20105000	19	20140000	20145000	.	.	.	.	0,0,0	31	12.0947	10.5608	7.88238	16.4998	10	10	9	12	9.8328e-05	0.000147501	1.52064e-05	0.0597068
19	20330000	20335000	19	20445000	20450000	.	.	.	.	0,0,0	21	6.63807	6.0082	6.99709	7.48565	8	7	8	8	0.00167172	0.000498246	0.00581603	0.00508086
19	20335000	20340000	19	20445000	20450000	.	.	.	.	0,0,0	14	4.28723	3.84996	4.32047	4.0262	6	5	6	6	0.0228825	0.0163433	0.0591247	0.0587062
19	20525000	20530000	19	20635000	20640000	.	.	.	.	0,0,0	14	2.92162	3.43324	4.84035	2.11332	4	5	6	3	0.00312035	0.0163433	0.0591247	0.00232403
19	20710000	20715000	19	20745000	20750000	.	.	.	.	0,0,0	31	11.7268	14.4132	16.279	11.3397	10	11	12	10	9.8328e-05	0.00256187	0.0549939	0.000368122
19	20710000	20715000	19	20765000	20770000	.	.	.	.	0,0,0	40	15.6976	15.8398	20.845	14.8249	12	12	13	11	0.000220654	0.000233978	0.0167527	1.19731e-05
19	20710000	20715000	19	20775000	20780000	.	.	.	.	0,0,0	67	18.188	24.6432	41.5645	24.8096	12	14	16	14	4.79782e-15	1.46645e-07	0.0487439	5.30517e-07
19	20710000	20715000	19	20805000	20810000	.	.	.	.	0,0,0	33	14.5133	14.8844	18.4418	17.2951	11	11	12	12	0.000585825	0.000751241	0.0248815	0.0263629
19	20710000	20715000	19	20830000	20835000	.	.	.	.	0,0,0	34	15.7295	13.7258	13.07	15.1334	12	11	11	11	0.00745666	0.000391567	0.000880541	0.000899618
19	20765000	20770000	19	20800000	20805000	.	.	.	.	0,0,0	43	13.7735	16.5522	15.032	18.921	11	12	11	12	2.13917e-07	3.21388e-05	8.02896e-07	9.51877e-05
19	20775000	20780000	19	20920000	20925000	.	.	.	.	0,0,0	23	7.15392	8.33396	9.52986	11.3991	8	9	9	10	0.000326575	0.00412107	0.00841452	0.051787
19	21460000	21465000	19	21575000	21580000	.	.	.	.	0,0,0	25	4.28353	5.28928	5.33883	5.61898	6	7	7	7	2.19242e-07	8.05872e-06	1.16326e-05	1.20295e-05
19	22020000	22025000	19	22055000	22060000	.	.	.	.	0,0,0	23	4.57353	8.31599	6.1186	5.46088	6	9	7	7	2.61366e-06	0.00412107	0.000100436	0.000103363
19	22030000	22035000	19	22065000	22070000	.	.	.	.	0,0,0	20	3.47713	9.50009	6.43436	8.35491	5	9	8	9	9.25108e-06	0.0239339	0.0117797	0.0503354
19	22385000	22390000	19	22440000	22445000	.	.	.	.	0,0,0	45	12.5212	13.6355	25.3492	19.9282	11	11	14	13	3.11734e-08	5.52855e-08	0.0395358	0.00164863
19	22385000	22390000	19	22445000	22450000	.	.	.	.	0,0,0	26	10.2062	9.85403	8.75957	14.7418	10	10	9	11	0.00350961	0.00450532	0.00104429	0.0691806
19	22385000	22390000	19	22450000	22455000	.	.	.	.	0,0,0	20	4.69108	5.69811	5.02294	8.01614	6	7	7	9	8.77235e-05	0.00125312	0.00186628	0.0503354
19	22385000	22390000	19	22530000	22535000	.	.	.	.	0,0,0	22	8.21065	7.84072	9.02989	7.61445	9	9	9	8	0.0054492	0.00767982	0.0153007	0.00247951
19	22440000	22445000	19	22530000	22535000	.	.	.	.	0,0,0	33	12.6417	11.8315	11.4119	18.1292	11	10	10	12	0.000585825	3.12467e-05	6.45432e-05	0.0263629
19	22485000	22490000	19	22530000	22535000	.	.	.	.	0,0,0	23	4.15	4.96106	6.7788	7.61274	6	7	8	8	2.61366e-06	7.1809e-05	0.00126515	0.00108839
19	22530000	22535000	19	23160000	23165000	.	.	.	.	0,0,0	13	2.53129	2.27626	2.09763	2.23795	4	3	3	3	0.00846838	0.00654614	0.00773561	0.00750925
19	22615000	22620000	19	22650000	22655000	.	.	.	.	0,0,0	18	2.91976	4.94014	4.63811	4.96325	4	6	6	7	1.92072e-05	0.00136262	0.00223808	0.010062
19	23100000	23105000	19	23235000	23240000	.	.	.	.	0,0,0	18	4.83325	4.80252	4.18202	7.58347	6	6	6	8	0.000711911	0.00136262	0.00223808	0.0395652
19	23160000	23165000	19	23235000	23240000	.	.	.	.	0,0,0	41	12.345	13.5295	14.4807	18.6274	10	11	11	12	8.66655e-09	2.03795e-06	4.58324e-06	0.00036115
19	23160000	23165000	19	23465000	23470000	.	.	.	.	0,0,0	16	3.84817	4.24583	4.09903	3.439	5	6	6	5	0.00124328	0.00815994	0.0124265	0.0035613
19	24555000	24560000	19	24590000	24595000	.	.	.	.	0,0,0	28	9.82568	11.0081	12.2039	9.25727	9	10	10	9	5.39532e-05	0.00124135	0.00269227	0.000187249
19	24560000	24565000	19	24595000	24600000	.	.	.	.	0,0,0	23	4.85719	10.1733	4.58998	3.88115	6	10	6	5	2.61366e-06	0.0232949	7.94883e-06	5.44943e-07
19	24995000	25000000	19	25050000	25055000	.	.	.	.	0,0,0	14	4.40723	4.1771	4.83492	3.49787	6	6	6	5	0.0228825	0.0356873	0.0591247	0.0239566
19	25885000	25890000	19	25935000	25940000	.	.	.	.	0,0,0	13	5.41603	4.26891	3.59761	3.86111	7	6	5	5	0.0957703	0.0652956	0.0486373	0.0522406
19	25885000	25890000	19	25940000	25945000	.	.	.	.	0,0,0	29	9.6825	9.76461	11.1916	14.0563	9	9	10	11	2.20184e-05	3.74098e-05	0.00133429	0.0178204
19	25885000	25890000	19	26240000	26245000	.	.	.	.	0,0,0	22	10.4609	7.5905	8.67834	6.26799	10	8	9	8	0.0353406	0.00131262	0.0153007	0.00247951
19	26185000	26190000	19	26240000	26245000	.	.	.	.	0,0,0	30	16.5111	14.365	16.3649	9.55976	12	11	12	9	0.0473312	0.00450241	0.0799876	3.14116e-05
19	26185000	26190000	19	26285000	26290000	.	.	.	.	0,0,0	11	2.54296	2.06129	2.3613	1.42523	4	3	3	1	0.0491346	0.0472408	0.0538051	0.00835868
19	26200000	26205000	19	26235000	26240000	.	.	.	.	0,0,0	18	3.13292	8.79787	6.55595	5.97935	4	9	8	7	1.92072e-05	0.0662561	0.0405628	0.010062
19	26240000	26245000	19	26425000	26430000	.	.	.	.	0,0,0	27	7.72837	12.0759	10.5624	8.93989	8	10	10	9	6.8662e-06	0.00243569	0.00512333	0.000441327
19	26240000	26245000	19	26450000	26455000	.	.	.	.	0,0,0	75	30.7154	28.8104	35.3864	40.5547	14	14	15	16	3.44158e-10	4.23199e-10	3.97678e-06	0.00284816
19	26240000	26245000	19	26765000	26770000	.	.	.	.	0,0,0	17	7.14556	5.1926	5.2107	7.5992	8	7	7	8	0.0279685	0.0124709	0.0209371	0.0701872
19	26290000	26295000	19	26450000	26455000	.	.	.	.	0,0,0	38	12.8198	12.8121	12.4176	18.1593	11	11	11	12	1.46076e-05	2.26092e-05	5.21903e-05	0.00211685
19	26295000	26300000	19	26450000	26455000	.	.	.	.	0,0,0	15	4.24941	3.68768	4.0506	4.92343	6	5	6	6	0.0107279	0.00690573	0.0275802	0.0288497
19	26370000	26375000	19	26445000	26450000	.	.	.	.	0,0,0	24	6.89302	7.8113	7.54976	10.9019	8	8	8	10	0.000133047	0.000255271	0.000526658	0.0318924
19	26370000	26375000	19	26450000	26455000	.	.	.	.	0,0,0	43	15.0594	15.8836	15.4942	26.8631	11	12	11	14	2.13917e-07	3.21388e-05	8.02896e-07	0.0763864
19	26450000	26455000	19	26515000	26520000	.	.	.	.	0,0,0	14	4.14545	4.14337	4.69261	3.57443	6	6	6	5	0.0228825	0.0356873	0.0591247	0.0239566
19	26755000	26760000	19	27045000	27050000	.	.	.	.	0,0,0	17	6.62035	6.10255	6.84849	7.09299	8	7	8	8	0.0279685	0.0124709	0.0725713	0.0701872
19	26755000	26760000	19	27125000	27130000	.	.	.	.	0,0,0	20	6.2267	6.9207	9.39173	8.43735	7	8	9	9	0.000595801	0.00552989	0.0479493	0.0503354
19	26765000	26770000	19	27030000	27035000	.	.	.	.	0,0,0	24	6.30506	8.17127	9.96516	12.2013	8	9	10	10	0.000133047	0.00206957	0.0294512	0.0318924
19	26765000	26770000	19	27040000	27045000	.	.	.	.	0,0,0	31	8.25747	9.11693	9.50681	15.7367	9	9	9	12	3.29237e-06	6.09248e-06	1.52064e-05	0.0597068
19	26765000	26770000	19	27045000	27050000	.	.	.	.	0,0,0	19	7.51189	7.14897	8.11448	8.86563	8	8	9	9	0.00762887	0.0110845	0.0811282	0.0835667
19	26765000	26770000	19	27050000	27055000	.	.	.	.	0,0,0	24	7.7014	7.48497	7.71233	7.60991	8	8	8	8	0.000133047	0.000255271	0.000526658	0.000447412
19	26765000	26770000	19	27125000	27130000	.	.	.	.	0,0,0	21	8.64418	7.97391	5.70915	6.06267	9	9	7	7	0.0104689	0.0139646	0.000729734	0.000745968
19	26775000	26780000	19	26965000	26970000	.	.	.	.	0,0,0	15	3.53025	4.34217	5.40987	6.15406	5	6	7	7	0.00346019	0.0174153	0.0779212	0.0788116
19	26775000	26780000	19	27030000	27035000	.	.	.	.	0,0,0	24	6.42858	6.26589	7.10652	6.79436	8	8	8	8	0.000133047	0.000255271	0.000526658	0.000447412
19	26775000	26780000	19	27040000	27045000	.	.	.	.	0,0,0	21	6.21393	6.77118	7.06055	7.90739	7	8	8	9	0.000236683	0.00266206	0.00581603	0.029154
19	26775000	26780000	19	27125000	27130000	.	.	.	.	0,0,0	16	5.16534	5.49502	4.842	3.20097	7	7	6	5	0.0151448	0.0236047	0.0124265	0.0035613
19	26895000	26900000	19	26960000	26965000	.	.	.	.	0,0,0	32	7.07601	10.6135	11.7792	13.5552	8	10	10	11	2.62757e-08	7.03013e-05	0.000143669	0.00336471
19	26960000	26965000	19	27125000	27130000	.	.	.	.	0,0,0	18	3.53494	5.08457	5.65033	6.27447	5	7	7	8	0.000129896	0.00597717	0.00955531	0.0395652
19	26965000	26970000	19	27050000	27055000	.	.	.	.	0,0,0	19	5.19694	6.72964	7.69179	6.3765	7	8	8	8	0.00143139	0.0110845	0.0225188	0.0214388
19	26965000	26970000	19	27125000	27130000	.	.	.	.	0,0,0	25	4.4595	5.53154	6.61522	7.52268	6	7	8	8	2.19242e-07	8.05872e-06	0.000218788	0.000177305
19	27040000	27045000	19	27125000	27130000	.	.	.	.	0,0,0	32	10.3547	12.1401	9.6345	15.5691	10	10	9	12	4.35595e-05	7.03013e-05	5.50303e-06	0.0414278
19	27075000	27080000	19	27125000	27130000	.	.	.	.	0,0,0	21	5.03432	6.50418	8.01906	8.08704	7	8	9	9	0.000236683	0.00266206	0.0277717	0.029154
19	27080000	27085000	19	27125000	27130000	.	.	.	.	0,0,0	46	11.2436	14.3668	16.4324	17.929	10	11	12	12	3.18677e-11	2.07521e-08	1.11056e-05	1.06857e-05
19	27125000	27130000	19	27280000	27285000	.	.	.	.	0,0,0	17	5.4295	5.34878	5.00692	5.91084	7	7	7	7	0.00735115	0.0124709	0.0209371	0.0222102
19	27280000	27285000	19	27375000	27380000	.	.	.	.	0,0,0	20	5.671	6.2757	5.89652	8.48319	7	8	7	9	0.000595801	0.00552989	0.00186628	0.0503354
19	27495000	27500000	19	27565000	27570000	.	.	.	.	0,0,0	43	19.592	18.008	21.38	22.9663	13	12	13	13	0.00207569	3.21388e-05	0.00441819	0.00465315
19	27495000	27500000	19	27580000	27585000	.	.	.	.	0,0,0	30	10.7811	8.77737	10.7404	11.0677	10	9	10	10	0.000210039	1.58798e-05	0.000638216	0.000781155
19	27495000	27500000	19	27585000	27590000	.	.	.	.	0,0,0	24	6.82112	5.19299	7.01715	5.73119	8	7	8	7	0.000133047	2.39246e-05	0.000526658	3.59681e-05
19	27520000	27525000	19	27555000	27560000	.	.	.	.	0,0,0	14	1.90814	4.54264	1.527	2.37073	2	6	1	3	0.000210062	0.0356873	0.000202926	0.00232403
19	27525000	27530000	19	27565000	27570000	.	.	.	.	0,0,0	105	45.0239	56.797	52.4346	54.0216	16	17	17	17	4.47028e-11	2.18028e-06	7.0859e-06	6.54083e-06
19	27565000	27570000	19	27640000	27645000	.	.	.	.	0,0,0	22	7.6533	8.5941	9.74539	8.88995	8	9	9	9	0.000735879	0.00767982	0.0153007	0.0160889
19	27580000	27585000	19	27645000	27650000	.	.	.	.	0,0,0	27	7.46549	7.90198	9.36696	11.8933	8	9	9	10	6.8662e-06	0.000208112	0.00049474	0.00579741
19	27610000	27615000	19	27645000	27650000	.	.	.	.	0,0,0	26	7.78352	8.58067	4.79521	13.0492	8	9	6	11	1.93359e-05	0.00045167	1.21299e-07	0.0691806
19	28125000	28130000	19	28170000	28175000	.	.	.	.	0,0,0	28	10.5009	12.0226	14.0054	14.51	10	10	11	11	0.000917176	0.00124135	0.0287076	0.0287996
19	33415000	33420000	19	33450000	33455000	.	.	.	.	0,0,0	14	3.25736	5.70979	3.39872	3.22973	5	7	5	5	0.00871876	0.0783645	0.0211163	0.0239566
19	33705000	33710000	19	33755000	33760000	.	.	.	.	0,0,0	19	6.15202	6.93728	6.28101	6.783	7	8	8	8	0.00143139	0.0110845	0.0225188	0.0214388
19	33755000	33760000	19	33840000	33845000	.	.	.	.	0,0,0	15	2.4021	3.4143	5.54176	5.37839	3	5	7	7	0.00020407	0.00690573	0.0779212	0.0788116
19	33985000	33990000	19	34020000	34025000	.	.	.	.	0,0,0	22	8.25009	11.6744	11.284	12.27	9	10	10	10	0.0054492	0.0377448	0.0787497	0.0805399
19	34340000	34345000	19	34390000	34395000	.	.	.	.	0,0,0	22	4.18785	4.76047	4.86684	7.94789	6	6	6	9	8.79751e-06	1.75017e-05	2.64616e-05	0.0160889
19	34410000	34415000	19	34510000	34515000	.	.	.	.	0,0,0	19	4.07933	4.48695	5.53268	9.26446	6	6	7	9	0.000269132	0.000566444	0.00440181	0.0835667
19	34465000	34470000	19	34510000	34515000	.	.	.	.	0,0,0	20	5.63767	4.73112	4.03942	9.11919	7	6	6	9	0.000595801	0.000185581	0.000276454	0.0503354
19	34685000	34690000	19	34795000	34800000	.	.	.	.	0,0,0	17	2.76457	3.56642	4.47387	2.61139	4	5	6	4	7.70591e-05	0.000994097	0.00586356	0.000174104
19	34795000	34800000	19	34870000	34875000	.	.	.	.	0,0,0	23	5.49574	5.57224	6.81017	5.25048	7	7	8	7	3.42638e-05	7.1809e-05	0.00126515	0.000103363
19	34795000	34800000	19	34885000	34890000	.	.	.	.	0,0,0	21	4.97912	5.56421	6.53368	4.53582	7	7	8	6	0.000236683	0.000498246	0.00581603	8.12278e-05
19	35235000	35240000	19	35290000	35295000	.	.	.	.	0,0,0	29	9.45309	8.22279	1.75085	9.68948	9	9	2	9	2.20184e-05	3.74098e-05	5.56047e-18	7.83373e-05
19	35250000	35255000	19	35290000	35295000	.	.	.	.	0,0,0	33	11.6885	9.61509	10.6418	8.35616	10	9	10	9	1.86509e-05	7.80281e-07	6.45432e-05	1.79733e-06
19	35290000	35295000	19	35535000	35540000	.	.	.	.	0,0,0	16	4.00893	4.72697	3.27713	5.33146	6	6	5	7	0.00461177	0.00815994	0.00314124	0.0437082
19	36155000	36160000	19	36515000	36520000	.	.	.	.	0,0,0	11	2.08765	2.08394	2.16711	1.49656	3	3	3	1	0.0246042	0.0472408	0.0538051	0.00835868
19	36490000	36495000	19	36530000	36535000	.	.	.	.	0,0,0	26	9.28353	10.9211	15.518	13.3419	9	10	11	11	0.000299597	0.00450532	0.0708907	0.0691806
19	36510000	36515000	19	36555000	36560000	.	.	.	.	0,0,0	16	2.72414	3.9969	5.88786	6.17526	4	6	7	7	0.000268037	0.00815994	0.0419077	0.0437082
19	36945000	36950000	19	36980000	36985000	.	.	.	.	0,0,0	18	2.00791	6.91648	4.44172	6.24722	3	8	6	8	2.0082e-06	0.020608	0.00223808	0.0395652
19	36945000	36950000	19	36995000	37000000	.	.	.	.	0,0,0	20	4.99001	5.25296	7.8715	7.64609	7	7	9	8	0.000595801	0.00125312	0.0479493	0.010513
19	40075000	40080000	19	40220000	40225000	.	.	.	.	0,0,0	35	12.5343	14.063	14.2118	18.7413	11	11	11	12	0.000148622	0.000207326	0.000461986	0.0106003
19	40200000	40205000	19	40240000	40245000	.	.	.	.	0,0,0	22	4.25096	4.35681	6.99497	5.17353	6	6	8	7	8.79751e-06	1.75017e-05	0.00271474	0.000261144
19	40205000	40210000	19	40240000	40245000	.	.	.	.	0,0,0	57	10.9149	18.7193	7.74423	22.0961	10	12	8	13	2.34554e-17	3.31968e-10	3.43167e-25	7.17766e-07
19	38040000	38045000	19	38080000	38085000	.	.	.	.	0,0,0	24	3.77593	4.11338	9.35409	3.00968	5	6	9	4	3.0566e-08	1.55452e-06	0.00452125	1.81165e-09
[truncated: 3,767 more rows]
